# Supplementary material for: Reconstruction and In Silico Analysis of Metabolic Network for an Oleaginous Yeast, Yarrowia lipolytica
Source: PLoS One. 2012 Dec 7;7(12):e51535. doi: 10.1371/journal.pone.0051535 (PMC3518092; doi:10.1371/journal.pone.0051535)
Supplement: Additional file S2 — A database of all protein and reaction associations sorted from KEGG and Expansy-Enzyme. (XLSX) [file pone.0051535.s002.xlsx]

## Sheet: KEGG
KEGG Protein-Reaction association
Reaction ID	Name	Preferred Name	Definition	Eqaution	Source	Ecno	Preferred-Ecno
R00001	Polyphosphate polyphosphohydrolase	Polyphosphate polyphosphohydrolase	Polyphosphate + n H2O <=> (n+1) Oligophosphate	C00404 + n C00001 <=> (n+1) C02174	KEGG	3.6.1.10	3.6.1.10
R00002	Reduced ferredoxin:dinitrogen oxidoreductase (ATP-hydrolysing)	Reduced ferredoxin:dinitrogen oxidoreductase (ATP-hydrolysing)	16 ATP + 16 H2O + 8 Reduced ferredoxin <=> 8 e- + 16 Orthophosphate + 16 ADP + 8 Oxidized ferredoxin	16 C00002 + 16 C00001 + 8 C00138 <=> 8 C05359 + 16 C00009 + 16 C00008 + 8 C00139	KEGG	1.18.6.1	1.18.6.1
R00004	diphosphate phosphohydrolase; pyrophosphate phosphohydrolase	diphosphate phosphohydrolase	Diphosphate + H2O <=> 2 Orthophosphate	C00013 + C00001 <=> 2 C00009	KEGG	3.6.1.1	3.6.1.1
R00005	urea-1-carboxylate amidohydrolase	urea-1-carboxylate amidohydrolase	Urea-1-carboxylate + H2O <=> 2 CO2 + 2 NH3	C01010 + C00001 <=> 2 C00011 + 2 C00014	KEGG	3.5.1.54	3.5.1.54
R00006	pyruvate:pyruvate acetaldehydetransferase (decarboxylating); 2-acetolactate pyruvate-lyase (carboxylating)	2-acetolactate pyruvate-lyase (carboxylating)	2-Acetolactate + CO2 <=> 2 Pyruvate	C00900 + C00011 <=> 2 C00022	KEGG	2.2.1.6	2.2.1.6
R00008	4-hydroxy-4-methyl-2-oxoglutarate pyruvate-lyase (pyruvate-forming)	4-hydroxy-4-methyl-2-oxoglutarate pyruvate-lyase (pyruvate-forming)	Parapyruvate <=> 2 Pyruvate	C06033 <=> 2 C00022	KEGG	4.1.3.17	4.1.3.17
R00009	hydrogen-peroxide:hydrogen-peroxide oxidoreductase	hydrogen-peroxide:hydrogen-peroxide oxidoreductase	2 Hydrogen peroxide <=> Oxygen + 2 H2O	2 C00027 <=> C00007 + 2 C00001	KEGG	1.11.1.6	1.11.1.6
R00010	alpha,alpha-trehalose glucohydrolase	alpha,alpha-trehalose glucohydrolase	alpha,alpha-Trehalose + H2O <=> 2 D-Glucose	C01083 + C00001 <=> 2 C00031	KEGG	3.2.1.28	3.2.1.28
R00011	Mn(II):hydrogen-peroxide oxidoreductase	Mn(II):hydrogen-peroxide oxidoreductase	2 Manganese(2+) + Hydrogen peroxide + 2 H+ <=> 2 Manganese(3+) + 2 H2O	2 C19610 + C00027 + 2 C00080 <=> 2 C19611 + 2 C00001	KEGG	1.11.1.13	1.11.1.13
R00012	GTP:GTP guanylyltransferase	GTP:GTP guanylyltransferase	2 GTP <=> Diphosphate + P1,P4-Bis(5'-guanosyl) tetraphosphate	2 C00044 <=> C00013 + C01261	KEGG	2.7.7.45	2.7.7.45
R00013	glyoxylate carboxy-lyase (dimerizing; tartronate-semialdehyde-forming)	glyoxylate carboxy-lyase (dimerizing; tartronate-semialdehyde-forming)	2 Glyoxylate <=> 2-Hydroxy-3-oxopropanoate + CO2	2 C00048 <=> C01146 + C00011	KEGG	4.1.1.47	4.1.1.47
R00014	pyruvate:thiamin diphosphate acetaldehydetransferase (decarboxylating)	pyruvate:thiamin diphosphate acetaldehydetransferase (decarboxylating)	Pyruvate + Thiamin diphosphate <=> 2-(alpha-Hydroxyethyl)thiamine diphosphate + CO2	C00022 + C00068 <=> C05125 + C00011	KEGG	1.2.4.1，2.2.1.6，4.1.1.1	1.2.4.1
R00015	sucrose:sucrose 1'-beta-D-fructosyltransferase; sucrose:sucrose 1F-beta-D-fructosyltransferase	sucrose:sucrose 1'-beta-D-fructosyltransferase	2 Sucrose <=> D-Glucose + 1F-beta-D-Fructosylsucrose	2 C00089 <=> C00031 + C03661	KEGG	2.4.1.99	2.4.1.99
R00016	D-glucose-1-phosphate:D-glucose-1-phosphate 6-phosphotransferase	D-glucose-1-phosphate:D-glucose-1-phosphate 6-phosphotransferase	2 D-Glucose 1-phosphate <=> D-Glucose + D-Glucose 1,6-bisphosphate	2 C00103 <=> C00031 + C00660	KEGG	2.7.1.41	2.7.1.41
R00017	ferrocytochrome-c:hydrogen-peroxide oxidoreductase	ferrocytochrome-c:hydrogen-peroxide oxidoreductase	Hydrogen peroxide + 2 Ferrocytochrome c <=> 2 Ferricytochrome c + 2 H2O	C00027 + 2 C00126 <=> 2 C00125 + 2 C00001	KEGG	1.11.1.5	1.11.1.5
R00018	putrescine:putrescine 4-aminobutyltransferase (ammonia-forming)	putrescine:putrescine 4-aminobutyltransferase (ammonia-forming)	2 Putrescine <=> Homospermidine + NH3	2 C00134 <=> C06366 + C00014	KEGG	2.5.1.44	2.5.1.44
R00019	hydrogen:ferredoxin oxidoreductase; reduced ferredoxin:H+ oxidoreductase	hydrogen:ferredoxin oxidoreductase	2 Reduced ferredoxin + 2 H+ <=> Hydrogen + 2 Oxidized ferredoxin	2 C00138 + 2 C00080 <=> C00282 + 2 C00139	KEGG	1.12.7.2，1.12.99.-	1.12.7.2
R00021	L-glutamate:ferredoxin oxidoreductase (transaminating)	L-glutamate:ferredoxin oxidoreductase (transaminating)	2 L-Glutamate + 2 Oxidized ferredoxin <=> L-Glutamine + 2-Oxoglutarate + 2 Reduced ferredoxin + 2 H+	2 C00025 + 2 C00139 <=> C00064 + C00026 + 2 C00138 + 2 C00080	KEGG	1.4.7.1	1.4.7.1
R00022	chitobiose N-acetylglucosaminohydrolase	chitobiose N-acetylglucosaminohydrolase	Chitobiose + H2O <=> 2 N-Acetyl-D-glucosamine	C01674 + C00001 <=> 2 C00140	KEGG	3.2.1.52	3.2.1.52
R00023	hydroxylamine:NAD+ oxidoreductase; NADH:hyponitrite oxidoreductase	hydroxylamine:NAD+ oxidoreductase;	2 Hydroxylamine + 2 NAD+ <=> Hyponitrite + 2 NADH + 2 H+	2 C00192 + 2 C00003 <=> C01818 + 2 C00004 + 2 C00080	KEGG	1.7.1.5	1.7.1.5
R00024	3-phospho-D-glycerate carboxy-lyase (dimerizing; D-ribulose-1,5-bisphosphate-forming)	3-phospho-D-glycerate carboxy-lyase (dimerizing; D-ribulose-1,5-bisphosphate-forming)	D-Ribulose 1,5-bisphosphate + CO2 + H2O <=> 2 3-Phospho-D-glycerate	C01182 + C00011 + C00001 <=> 2 C00197	KEGG	4.1.1.39	4.1.1.39
R00025	ethylnitronate:oxygen 2-oxidoreductase (nitrite-forming)	ethylnitronate:oxygen 2-oxidoreductase (nitrite-forming)	Ethylnitronate + Oxygen + Reduced FMN <=> Acetaldehyde + Nitrite + FMN + H2O	C18091 + C00007 + C01847 <=> C00084 + C00088 + C00061 + C00001	KEGG	1.13.12.16	1.13.12.16
R00026	cellobiose glucohydrolase	cellobiose glucohydrolase	Cellobiose + H2O <=> 2 beta-D-Glucose	C00185 + C00001 <=> 2 C00221	KEGG	3.2.1.21	3.2.1.21
R00027	2-hydroxy-1,2-diphenylethanone benzaldehyde-lyase (benzaldehyde-forming)	2-hydroxy-1,2-diphenylethanone benzaldehyde-lyase (benzaldehyde-forming)	Benzoin <=> 2 Benzaldehyde	C01408 <=> 2 C00261	KEGG	4.1.2.38	4.1.2.38
R00028	maltose glucohydrolase	maltose glucohydrolase	Maltose + H2O <=> 2 alpha-D-Glucose	C00208 + C00001 <=> 2 C00267	KEGG	3.2.1.20	3.2.1.20
R00029	thiosulfate:ferricytochrome-c oxidoreductase	thiosulfate:ferricytochrome-c oxidoreductase	2 Thiosulfate + 2 Ferricytochrome c <=> Tetrathionate + 2 Ferrocytochrome c	2 C00320 + 2 C00125 <=> C02084 + 2 C00126	KEGG	1.8.2.2	1.8.2.2
R00031	1,2-Benzenediol:oxygen oxidoreductase	1,2-Benzenediol:oxygen oxidoreductase	Oxygen + 2 L-Tyrosine <=> 2 3,4-Dihydroxy-L-phenylalanine	C00007 + 2 C00082 <=> 2 C00355	KEGG	1.10.3.1	1.10.3.1
R00032	beta-Carotene:oxygen 15,15'-oxidoreductase (bond-cleaving)	beta-Carotene:oxygen 15,15'-oxidoreductase (bond-cleaving)	beta-Carotene + Oxygen <=> 2 Retinal	C02094 + C00007 <=> 2 C00376	KEGG	1.14.99.36	1.14.99.36
R00033	thiamine:oxygen 5-oxidoreductase	thiamine:oxygen 5-oxidoreductase	Thiamine + Oxygen <=> Hydrogen peroxide + Thiamine aldehyde	C00378 + C00007 <=> C00027 + C05856	KEGG	1.1.3.23	1.1.3.23
R00034	Cyclobutadipyrimidine (in DNA) pyrimidine-lyase	Cyclobutadipyrimidine (in DNA) pyrimidine-lyase	Cyclobutadipyrimidine <=> 2 Pyrimidine 5'-deoxynucleotide	C03103 <=> 2 C08249	KEGG	4.1.99.3	4.1.99.3
R00036	5-aminolevulinate hydro-lyase (adding 5-aminolevulinate and cyclizing; porphobilinogen-forming)	5-aminolevulinate hydro-lyase (adding 5-aminolevulinate and cyclizing; porphobilinogen-forming)	2 5-Aminolevulinate <=> Porphobilinogen + 2 H2O	2 C00430 <=> C00931 + 2 C00001	KEGG	4.2.1.24	4.2.1.24
R00038	4-hydroxy-3-hexanone propanal-lyase (propanal-forming)	4-hydroxy-3-hexanone propanal-lyase (propanal-forming)	2 Propanal <=> 4-Hydroxyhexan-3-one	2 C00479 <=> C02948	KEGG	4.1.2.35	4.1.2.35
R00039	raffinose:raffinose 1F-alpha-D-galactosyltransferase	raffinose:raffinose 1F-alpha-D-galactosyltransferase	2 Raffinose <=> Lychnose + Sucrose	2 C00492 <=> C08242 + C00089	KEGG	2.4.1.166	2.4.1.166
R00041	long-chain-alcohol:oxygen oxidoreductase	long-chain-alcohol:oxygen oxidoreductase	2 Long-chain alcohol + Oxygen <=> 2 Long-chain aldehyde + 2 H2O	2 C00339 + C00007 <=> 2 C00609 + 2 C00001	KEGG	1.1.3.20	1.1.3.20
R00042	4-hydroxyphenylpyruvate:oxygen oxidoreductase (decarboxylating)	4-hydroxyphenylpyruvate:oxygen oxidoreductase (decarboxylating)	2 3-(4-Hydroxyphenyl)pyruvate + Oxygen <=> 2 4-Hydroxyphenylacetate + 2 CO2	2 C01179 + C00007 <=> 2 C00642 + 2 C00011	KEGG	1.2.3.13	1.2.3.13
R00043	1,2-bis(4-hydroxy-3-methoxyphenyl)ethylene:oxygen oxidoreductase (alpha-beta-bond-cleaving)	1,2-bis(4-hydroxy-3-methoxyphenyl)ethylene:oxygen oxidoreductase (alpha-beta-bond-cleaving)	1,2-Bis(4-hydroxy-3-methoxyphenyl)ethylene + Oxygen <=> 2 4-Hydroxy-3-methoxy-benzaldehyde	C04547 + C00007 <=> 2 C00755	KEGG	1.13.11.43	1.13.11.43
R00044	columbamine:oxygen oxidoreductase (cyclizing)	columbamine:oxygen oxidoreductase (cyclizing)	2 Columbamine + Oxygen <=> 2 Berberine + 2 H2O	2 C01795 + C00007 <=> 2 C00757 + 2 C00001	KEGG	1.21.3.2	1.21.3.2
R00045	3,4-dihydroxy-L-phenylalanine:oxygen oxidoreductase	3,4-dihydroxy-L-phenylalanine:oxygen oxidoreductase	Oxygen + 2 3,4-Dihydroxy-L-phenylalanine <=> 2 Dopaquinone + 2 H2O	C00007 + 2 C00355 <=> 2 C00822 + 2 C00001	KEGG	1.10.3.1	1.10.3.1
R00047	6-hydroxynicotinate,hydrogen-donor:oxygen oxidoreductase (3-hydroxylating, decarboxylating)	6-hydroxynicotinate,hydrogen-donor:oxygen oxidoreductase (3-hydroxylating, decarboxylating)	Oxygen + 6-Hydroxynicotinate + Reduced acceptor <=> 2,5-Dihydroxypyridine + CO2 + Acceptor + H2O	C00007 + C01020 + C00030 <=> C01059 + C00011 + C00028 + C00001	KEGG	1.14.99.-	1.14.99.-
R00048	(R)-3-((R)-3-Hydroxybutanoyloxy)-butanoate hydroxybutanoylhydrolase	(R)-3-((R)-3-Hydroxybutanoyloxy)-butanoate hydroxybutanoylhydrolase	(R)-3-((R)-3-Hydroxybutanoyloxy)butanoate + H2O <=> 2 (R)-3-Hydroxybutanoate	C04546 + C00001 <=> 2 C01089	KEGG	3.1.1.22	3.1.1.22
R00049	1-O-galloyl-beta-D-glucose:1-O-galloyl-beta-D-glucose O-galloyltransferase	1-O-galloyl-beta-D-glucose:1-O-galloyl-beta-D-glucose O-galloyltransferase	2 1-O-Galloyl-beta-D-glucose <=> D-Glucose + 1-O,6-O-Digalloyl-beta-D-glucose	2 C01158 <=> C00031 + C04101	KEGG	2.3.1.90	2.3.1.90
R00052	chloride:hydrogen-peroxide oxidoreductase	chloride:hydrogen-peroxide oxidoreductase	Hydrogen peroxide + Alkane + Hydrochloric acid <=> RCl + 2 H2O	C00027 + C01371 + C01327 <=> C01334 + 2 C00001	KEGG	1.11.1.10	1.11.1.10
R00053	digallate acylhydrolase; tannin acylhydrolase	digallate acylhydrolase	Digallate + H2O <=> 2 Gallate	C01572 + C00001 <=> 2 C01424	KEGG	3.1.1.20	3.1.1.20
R00054	orsellinate-depside hydrolase	orsellinate-depside hydrolase	Orsellinate depside + H2O <=> 2 Orsellinate	C02868 + C00001 <=> 2 C01839	KEGG	3.1.1.40	3.1.1.40
R00055	inosine:oxygen 5'-oxidoreductase	inosine:oxygen 5'-oxidoreductase	2 Inosine + Oxygen <=> 2 5'-Oxoinosine + 2 H2O	2 C00294 + C00007 <=> 2 C01993 + 2 C00001	KEGG	1.1.3.28	1.1.3.28
R00056	dinucleotide nucleotidohydrolase	dinucleotide nucleotidohydrolase	Dinucleotide + H2O <=> 2 Mononucleotide	C01910 + C00001 <=> 2 C02171	KEGG	3.6.1.9	3.6.1.9
R00057	Thiol:oxygen oxidoreductase	Thiol:oxygen oxidoreductase	Oxygen + 4 R'C(R)SH <=> 2 R'C(R)S-S(R)CR' + 2 H2O	C00007 + 4 C01525 <=> 2 C02318 + 2 C00001	KEGG	1.8.3.2	1.8.3.2
R00058	catechol:oxygen oxidoreductase; 1,2-benzenediol:oxygen oxidoreductase	catechol:oxygen oxidoreductase	Oxygen + 2 Catechol <=> 2 o-Benzoquinone + 2 H2O	C00007 + 2 C00090 <=> 2 C02351 + 2 C00001	KEGG	1.10.3.1，1.14.18.1	1.10.3.1
R00059	N-(6-aminohexanoyl)-6-aminohexanoate amidohydrolase	N-(6-aminohexanoyl)-6-aminohexanoate amidohydrolase	N-(6-Aminohexanoyl)-6-aminohexanoate + H2O <=> 2 6-Aminohexanoate	C01255 + C00001 <=> 2 C02378	KEGG	3.5.1.46	3.5.1.46
R00060	Sulochrin:oxygen oxidoreductase (cyclizing, (+)-specific)	Sulochrin:oxygen oxidoreductase (cyclizing, (+)-specific)	Oxygen + 2 Sulochrin <=> 2 (+)-Bisdechlorogeodin + 2 H2O	C00007 + 2 C00495 <=> 2 C03036 + 2 C00001	KEGG	1.21.3.4	1.21.3.4
R00061	Sulochrin:oxygen oxidoreductase (cyclizing, (-)-specific)	Sulochrin:oxygen oxidoreductase (cyclizing, (-)-specific)	Oxygen + 2 Sulochrin <=> 2 (-)-Bisdechlorogeodin + 2 H2O	C00007 + 2 C00495 <=> 2 C03040 + 2 C00001	KEGG	1.21.3.5	1.21.3.5
R00062	bilirubin-glucuronoside:bilirubin-glucuronoside D-glucuronosyltransferase	bilirubin-glucuronoside:bilirubin-glucuronoside D-glucuronosyltransferase	2 Bilirubin-glucuronoside <=> Bilirubin + Bilirubin beta-diglucuronide	2 C03374 <=> C00486 + C05787	KEGG	2.4.1.95	2.4.1.95
R00063	1-O-sinapoyl-beta-D-glucose:1-O-sinapoyl-beta-D-glucose 1-O-sinapoyltransferase; 1-O-(4-hydroxy-3,5-dimethoxycinnamoyl)-beta-D-glucoside:1-O-(4-hydroxy-3,5-dimethoxycinnamoyl-beta-D-glucoside 1-O-sinapoyltransferase	1-O-sinapoyl-beta-D-glucose:1-O-sinapoyl-beta-D-glucose 1-O-sinapoyltransferase	2 1-O-Sinapoyl-beta-D-glucose <=> 1,2-Bis-O-sinapoyl-beta-D-glucoside + D-Glucose	2 C01175 <=> C04275 + C00031	KEGG	2.3.1.103	2.3.1.103
R00066	6,7-Dimethyl-8-(1-D-ribityl)lumazine:6,7-dimethyl-8-(1-D-ribityl)lumazine 2,3-butanediyltransferase	6,7-Dimethyl-8-(1-D-ribityl)lumazine:6,7-dimethyl-8-(1-D-ribityl)lumazine 2,3-butanediyltransferase	2 6,7-Dimethyl-8-(D-ribityl)lumazine <=> Riboflavin + 5-Amino-6-(1-D-ribitylamino)uracil	2 C04332 <=> C00255 + C04732	KEGG	2.5.1.9	2.5.1.9
R00067	Reduced ferredoxin:dinitrogen oxidoreductase (ATP-hydrolysing)	Reduced ferredoxin:dinitrogen oxidoreductase (ATP-hydrolysing)	2 e- + 2 H+ <=> Hydrogen	2 C05359 + 2 C00080 <=> C00282	KEGG	1.18.6.1	1.18.6.1
R00068	L-ascorbate:oxygen oxidoreductase	L-ascorbate:oxygen oxidoreductase	Oxygen + 2 Ascorbate <=> 2 Dehydroascorbate + 2 H2O	C00007 + 2 C00072 <=> 2 C05422 + 2 C00001	KEGG	1.10.3.3	1.10.3.3
R00069	4-imidazolone-5-propanoate:oxygen oxidoreductase	4-imidazolone-5-propanoate:oxygen oxidoreductase	Hydantoin-5-propionate + Hydrogen peroxide <=> 4-Imidazolone-5-propanoate + Oxygen + H2O	C05565 + C00027 <=> C03680 + C00007 + C00001	KEGG	1.14.13.-，1.17.3.2	1.17.3.2
R00070	D-urobilinogen:oxygen oxidoreductase	D-urobilinogen:oxygen oxidoreductase	2 D-Urobilinogen + Oxygen <=> 2 D-Urobilin + 2 H2O	2 C05791 + C00007 <=> 2 C05795 + 2 C00001	KEGG
R00072	thiamine-aldehyde:oxygen 5-oxidoreductase	thiamine-aldehyde:oxygen 5-oxidoreductase	Thiamine aldehyde + Oxygen + H2O <=> Hydrogen peroxide + Thiamine acetic acid	C05856 + C00007 + C00001 <=> C00027 + C02892	KEGG	1.1.3.23	1.1.3.23
R00073	reduced acceptor:prostaglandin G2 oxidoreductase	reduced acceptor:prostaglandin G2 oxidoreductase	Prostaglandin H2 + Acceptor + H2O <=> Prostaglandin G2 + Reduced acceptor	C00427 + C00028 + C00001 <=> C05956 + C00030	KEGG	1.14.99.1	1.14.99.1
R00074	2-aminophenol:oxygen oxidoreductase (dimerizing)	2-aminophenol:oxygen oxidoreductase (dimerizing)	3 Oxygen + 4 2-Aminophenol <=> 6 H2O + 2 Isophenoxazine	3 C00007 + 4 C01987 <=> 6 C00001 + 2 C02161	KEGG	1.10.3.4，ESOPHENOXAZINE SYNTHASE APOENZYME FROM PYCNOPORUS COCCINEUS.，Biochim. Biophys. Acta. 96 (1965) 318-27.	1.10.3.4
R00075	S-adenosyl-L-methionine:S-adenosyl-L-methionine 3-amino-3-carboxypropyltransferase	S-adenosyl-L-methionine:S-adenosyl-L-methionine 3-amino-3-carboxypropyltransferase	3 S-Adenosyl-L-methionine <=> 3 5'-Methylthioadenosine + Nicotianamine	3 C00019 <=> 3 C00170 + C05324	KEGG	2.5.1.43	2.5.1.43
R00076	ATP:phosphorylase-b phosphotransferase; ATP:[glycogen phosphorylase] phosphotransferase	ATP:phosphorylase-b phosphotransferase	4 ATP + 2 Phosphorylase b <=> 4 ADP + Phosphorylase a	4 C00002 + 2 C02308 <=> 4 C00008 + C02307	KEGG	2.7.11.19	2.7.11.19
R00077	[Phosphorylase a] phosphohydrolase; [glycogen phosphorylase] phosphohydrolase	[Phosphorylase a] phosphohydrolase	Phosphorylase a + 4 H2O <=> 2 Phosphorylase b + 4 Orthophosphate	C02307 + 4 C00001 <=> 2 C02308 + 4 C00009	KEGG	3.1.3.17	3.1.3.17
R00078	Fe(II):oxygen oxidoreductase; Fe2+:oxygen oxidoreductase	Fe(II):oxygen oxidoreductase	Oxygen + 4 Fe2+ + 4 H+ <=> 4 Fe3+ + 2 H2O	C00007 + 4 C14818 + 4 C00080 <=> 4 C14819 + 2 C00001	KEGG	1.16.3.1	1.16.3.1
R00080	Catechol:oxygen oxidoreductase (dimerizing)	Catechol:oxygen oxidoreductase (dimerizing)	4 Catechol + 3 Oxygen <=> 6 H2O + 2 Dibenzo[1,4]dioxin-2,3-dione	4 C00090 + 3 C00007 <=> 6 C00001 + 2 C03861	KEGG	1.1.3.14，1.10.3.1	1.1.3.14
R00081	Ferrocytochrome-c:oxygen oxidoreductase	Ferrocytochrome-c:oxygen oxidoreductase	Oxygen + 4 Ferrocytochrome c + 4 H+ <=> 4 Ferricytochrome c + 2 H2O	C00007 + 4 C00126 + 4 C00080 <=> 4 C00125 + 2 C00001	KEGG	1.7.2.1，1.9.3.1	1.7.2.1
R00082	Ferrocytochrome c2:oxygen oxidoreductase	Ferrocytochrome c2:oxygen oxidoreductase	Oxygen + 4 Ferrocytochrome c2 <=> 4 Ferricytochrome c2 + 2 H2O	C00007 + 4 C01000 <=> 4 C00997 + 2 C00001	KEGG	1.7.2.1，1.9.3.1	1.7.2.1
R00083	Benzenediol:oxygen oxidoreductase	Benzenediol:oxygen oxidoreductase	Oxygen + 4 Benzenediol <=> 4 Semiquinone + 2 H2O	C00007 + 4 C01785 <=> 4 C05309 + 2 C00001	KEGG	1.10.3.2	1.10.3.2
R00084	porphobilinogen:(4-[2-carboxyethyl]-3-[carboxymethyl]pyrrol-2-yl)methyltransferase (hydrolysing); porphobilinogen ammonia-lyase (polymerizing)	porphobilinogen ammonia-lyase (polymerizing)	4 Porphobilinogen + H2O <=> Hydroxymethylbilane + 4 NH3	4 C00931 + C00001 <=> C01024 + 4 C00014	KEGG	2.5.1.61	2.5.1.61
R00085	ATP diphosphohydrolase (phosphate-forming)	ATP diphosphohydrolase (phosphate-forming)	ATP + 2 H2O <=> AMP + 2 Orthophosphate	C00002 + 2 C00001 <=> C00020 + 2 C00009	KEGG	3.6.1.5	3.6.1.5
R00086	ATP phosphohydrolase	ATP phosphohydrolase	ATP + H2O <=> ADP + Orthophosphate	C00002 + C00001 <=> C00008 + C00009	KEGG	3.6.1.3，3.6.1.5，3.6.1.8，3.6.1.15，3.6.3.1，3.6.3.2，3.6.3.3，3.6.3.4，3.6.3.5，3.6.3.6，3.6.3.7，3.6.3.8，3.6.3.9，3.6.3.10，3.6.3.11，3.6.3.12，3.6.3.14，3.6.3.15，3.6.3.16，3.6.3.17，3.6.3.18，3.6.3.19，3.6.3.20，3.6.3.21，3.6.3.22，3.6.3.23，3.6.3.24，3.6.3.25，3.6.3.26，3.6.3.27，3.6.3.28，3.6.3.29，3.6.3.30，3.6.3.31，3.6.3.32，3.6.3.33，3.6.3.34，3.6.3.35，3.6.3.36，3.6.3.37，3.6.3.38，3.6.3.39，3.6.3.40，3.6.3.41，3.6.3.42，3.6.3.…	3.6.1.3
R00087	ATP diphosphohydrolase (diphosphate-forming); ATP pyrophosphohydrolase	ATP pyrophosphohydrolase	ATP + H2O <=> AMP + Diphosphate	C00002 + C00001 <=> C00020 + C00013	KEGG	3.6.1.8	3.6.1.8
R00088	ATP aminohydrolase	ATP aminohydrolase	ATP + H2O <=> ITP + NH3	C00002 + C00001 <=> C00081 + C00014	KEGG	3.5.4.18	3.5.4.18
R00089	ATP diphosphate-lyase (cyclizing; 3',5'-cyclic-AMP-forming)	ATP diphosphate-lyase (cyclizing; 3',5'-cyclic-AMP-forming)	ATP <=> 3',5'-Cyclic AMP + Diphosphate	C00002 <=> C00575 + C00013	KEGG	4.6.1.1	4.6.1.1
R00090	NADH:hydrogen-peroxide oxidoreductase	NADH:hydrogen-peroxide oxidoreductase	Hydrogen peroxide + NADH + H+ <=> NAD+ + 2 H2O	C00027 + C00004 + C00080 <=> C00003 + 2 C00001	KEGG	1.11.1.1	1.11.1.1
R00091	CoA:NAD+ oxidoreductase	CoA:NAD+ oxidoreductase	NAD+ + 2 CoA <=> CoA-disulfide + NADH + H+	C00003 + 2 C00010 <=> C02015 + C00004 + C00080	KEGG	1.8.1.14	1.8.1.14
R00092	Fe2+:NAD+ oxidoreductase; NADH:Fe3+ oxidoreductase	Fe2+:NAD+ oxidoreductase;	NAD+ + 2 Fe2+ <=> NADH + H+ + 2 Fe3+	C00003 + 2 C14818 <=> C00004 + C00080 + 2 C14819	KEGG	1.16.1.7	1.16.1.7
R00093	L-glutamate:NAD+ oxidoreductase (transaminating)	L-glutamate:NAD+ oxidoreductase (transaminating)	2 L-Glutamate + NAD+ <=> L-Glutamine + 2-Oxoglutarate + NADH + H+	2 C00025 + C00003 <=> C00064 + C00026 + C00004 + C00080	KEGG	1.4.1.14	1.4.1.14
R00094	glutathione:NAD+ oxidoreductase	glutathione:NAD+ oxidoreductase	2 Glutathione + NAD+ <=> Glutathione disulfide + NADH + H+	2 C00051 + C00003 <=> C00127 + C00004 + C00080	KEGG	1.8.1.7	1.8.1.7
R00095	NADH:monodehydroascorbate oxidoreductase	NADH:monodehydroascorbate oxidoreductase	NAD+ + 2 Ascorbate <=> NADH + 2 Monodehydroascorbate + H+	C00003 + 2 C00072 <=> C00004 + 2 C01041 + C00080	KEGG	1.6.5.4	1.6.5.4
R00097	NADH:cob(III)alamine oxidoreductase	NADH:cob(III)alamine oxidoreductase	NAD+ + 2 Cob(II)alamin + 2 H2O + H+ <=> NADH + 2 Aquacob(III)alamin	C00003 + 2 C00541 + 2 C00001 + C00080 <=> C00004 + 2 C00992	KEGG	1.16.1.3	1.16.1.3
R00099	cob(I)alamin:NAD+ oxidoreductase; NADH:cob(II)alamin oxidoreductase	cob(I)alamin:NAD+ oxidoreductase;	NAD+ + 2 Cob(I)alamin <=> NADH + H+ + 2 Cob(II)alamin	C00003 + 2 C00853 <=> C00004 + C00080 + 2 C00541	KEGG	1.16.1.4	1.16.1.4
R00100	NADH:ferricytochrome-b5 oxidoreductase	NADH:ferricytochrome-b5 oxidoreductase	NADH + 2 Ferricytochrome b5 <=> NAD+ + 2 Ferrocytochrome b5 + H+	C00004 + 2 C00996 <=> C00003 + 2 C00999 + C00080	KEGG	1.6.2.2	1.6.2.2
R00101	NADH:ferrileghemoglobin oxidoreductase	NADH:ferrileghemoglobin oxidoreductase	NADH + 2 Ferrileghemoglobin <=> NAD+ + 2 Ferroleghemoglobin + H+	C00004 + 2 C02683 <=> C00003 + 2 C02685 + C00080	KEGG	1.6.2.6	1.6.2.6
R00102	NAD+ glycohydrolase	NAD+ glycohydrolase	NAD+ + H2O <=> Nicotinamide + ADP-ribose	C00003 + C00001 <=> C00153 + C00301	KEGG	3.2.2.5，3.2.2.6	3.2.2.5
R00103	NAD+ phosphohydrolase	NAD+ phosphohydrolase	NAD+ + H2O <=> AMP + Nicotinamide D-ribonucleotide	C00003 + C00001 <=> C00020 + C00455	KEGG	3.6.1.9，3.6.1.22	3.6.1.9
R00104	ATP:NAD+ 2'-phosphotransferase	ATP:NAD+ 2'-phosphotransferase	ATP + NAD+ <=> ADP + NADP+	C00002 + C00003 <=> C00008 + C00006	KEGG	2.7.1.23	2.7.1.23
R00105	ATP:NADH 2'-phosphotransferase	ATP:NADH 2'-phosphotransferase	ATP + NADH <=> ADP + NADPH	C00002 + C00004 <=> C00008 + C00005	KEGG	2.7.1.86	2.7.1.86
R00106	NADPH:ferricytochrome oxidoreductase	NADPH:ferricytochrome oxidoreductase	NADPH + 2 Ferricytochrome <=> NADP+ + 2 Ferrocytochrome + H+	C00005 + 2 C00923 <=> C00006 + 2 C00924 + C00080	KEGG	1.6.2.4	1.6.2.4
R00107	cob(II)alamin:NADP+ oxidoreductase; NADPH:aquacob(III)alamin oxidoreductase	cob(II)alamin:NADP+ oxidoreductase;	NADPH + 2 Aquacob(III)alamin <=> NADP+ + 2 Cob(II)alamin + 2 H2O + H+	C00005 + 2 C00992 <=> C00006 + 2 C00541 + 2 C00001 + C00080	KEGG	1.16.1.5	1.16.1.5
R00108	NADPH:ferricytochrome-c2 oxidoreductase	NADPH:ferricytochrome-c2 oxidoreductase	NADPH + 2 Ferricytochrome c2 <=> NADP+ + 2 Ferrocytochrome c2 + H+	C00005 + 2 C00997 <=> C00006 + 2 C01000 + C00080	KEGG	1.6.2.5	1.6.2.5
R00109	NADPH:ferrileghemoglobin oxidoreductase	NADPH:ferrileghemoglobin oxidoreductase	NADPH + 2 Ferrileghemoglobin <=> NADP+ + 2 Ferroleghemoglobin + H+	C00005 + 2 C02683 <=> C00006 + 2 C02685 + C00080	KEGG	1.6.2.6	1.6.2.6
R00111	N-(omega)-Hydroxyarginine,NADPH:oxygen oxidoreductase (nitric-oxide-forming)	N-(omega)-Hydroxyarginine,NADPH:oxygen oxidoreductase (nitric-oxide-forming)	NADPH + 2 N-(omega)-Hydroxyarginine + 2 Oxygen + H+ <=> NADP+ + 2 Nitric oxide + 2 L-Citrulline + 2 H2O	C00005 + 2 C05933 + 2 C00007 + C00080 <=> C00006 + 2 C00533 + 2 C00327 + 2 C00001	KEGG	1.14.13.39	1.14.13.39
R00112	NADPH:NAD+ oxidoreductase	NADPH:NAD+ oxidoreductase	NADPH + NAD+ <=> NADP+ + NADH	C00005 + C00003 <=> C00006 + C00004	KEGG	1.6.1.1，1.6.1.2	1.6.1.1
R00113	NADPH:hydrogen-peroxide oxidoreductase	NADPH:hydrogen-peroxide oxidoreductase	Hydrogen peroxide + NADPH + H+ <=> NADP+ + 2 H2O	C00027 + C00005 + C00080 <=> C00006 + 2 C00001	KEGG	1.11.1.2	1.11.1.2
R00114	L-Glutamate:NADP+ oxidoreductase (transaminating)	L-Glutamate:NADP+ oxidoreductase (transaminating)	2 L-Glutamate + NADP+ <=> L-Glutamine + 2-Oxoglutarate + NADPH + H+	2 C00025 + C00006 <=> C00064 + C00026 + C00005 + C00080	KEGG	1.4.1.13	1.4.1.13
R00115	glutathione:NADP+ oxidoreductase	glutathione:NADP+ oxidoreductase	2 Glutathione + NADP+ <=> Glutathione disulfide + NADPH + H+	2 C00051 + C00006 <=> C00127 + C00005 + C00080	KEGG	1.8.1.7	1.8.1.7
R00118	NADP+ 2'-phosphohydrolase	NADP+ 2'-phosphohydrolase	NADP+ + H2O <=> Orthophosphate + NAD+	C00006 + C00001 <=> C00009 + C00003	KEGG	3.1.3.-	3.1.3.-
R00119	NADP+ glycohydrolase	NADP+ glycohydrolase	NADP+ + H2O <=> Nicotinamide + ADPribose 2'-phosphate	C00006 + C00001 <=> C00153 + C03246	KEGG	3.2.2.5，3.2.2.6	3.2.2.5
R00120	glutathione:oxygen oxidoreductase	glutathione:oxygen oxidoreductase	Oxygen + 2 Glutathione <=> Glutathione disulfide + Hydrogen peroxide	C00007 + 2 C00051 <=> C00127 + C00027	KEGG	1.8.3.3	1.8.3.3
R00122	ADP phosphohydrolase	ADP phosphohydrolase	ADP + H2O <=> AMP + Orthophosphate	C00008 + C00001 <=> C00020 + C00009	KEGG	3.6.1.5	3.6.1.5
R00123	ADP aminohydrolase	ADP aminohydrolase	ADP + H2O <=> IDP + NH3	C00008 + C00001 <=> C00104 + C00014	KEGG	3.5.4.7	3.5.4.7
R00124	ATP:ADP phosphatransferase	ATP:ADP phosphatransferase	ATP + ADP <=> ADP + ATP	C00002 + C00008 <=> C00008 + C00002	KEGG	2.7.4.6	2.7.4.6
R00125	P1,P4-bis(5'-adenosyl)-tetraphosphate nucleotidebisphosphohydrolase	P1,P4-bis(5'-adenosyl)-tetraphosphate nucleotidebisphosphohydrolase	P1,P4-Bis(5'-adenosyl) tetraphosphate + H2O <=> 2 ADP	C01260 + C00001 <=> 2 C00008	KEGG	3.6.1.41	3.6.1.41
R00126	ADP:ATP adenylyltransferase	ADP:ATP adenylyltransferase	ADP + ATP <=> Orthophosphate + P1,P4-Bis(5'-adenosyl) tetraphosphate	C00008 + C00002 <=> C00009 + C01260	KEGG	2.7.7.53	2.7.7.53
R00127	ATP:AMP phosphotransferase	ATP:AMP phosphotransferase	ATP + AMP <=> 2 ADP	C00002 + C00020 <=> 2 C00008	KEGG	2.7.4.3	2.7.4.3
R00128	Adenosine-tetraphosphate phosphohydrolase	Adenosine-tetraphosphate phosphohydrolase	Adenosine tetraphosphate + H2O <=> ATP + Orthophosphate	C03483 + C00001 <=> C00002 + C00009	KEGG	3.6.1.14	3.6.1.14
R00129	(6S)-6-Hydroxy-1,4,5,6-tetrahydronicotinamide-adenine-dinucleotide hydro-lyase (ATP-hydrolysing)	(6S)-6-Hydroxy-1,4,5,6-tetrahydronicotinamide-adenine-dinucleotide hydro-lyase (ATP-hydrolysing)	ATP + (6S)-6-Hydroxy-1,4,5,6-tetrahydronicotinamide-adenine dinucleotide <=> ADP + Orthophosphate + NADH	C00002 + C04856 <=> C00008 + C00009 + C00004	KEGG	4.2.1.93	4.2.1.93
R00130	ATP:dephospho-CoA 3'-phosphotransferase	ATP:dephospho-CoA 3'-phosphotransferase	ATP + Dephospho-CoA <=> ADP + CoA	C00002 + C00882 <=> C00008 + C00010	KEGG	2.7.1.24	2.7.1.24
R00131	Urea amidohydrolase	Urea amidohydrolase	Urea + H2O <=> CO2 + 2 NH3	C00086 + C00001 <=> C00011 + 2 C00014	KEGG	3.5.1.5	3.5.1.5
R00132	carbonate hydro-lyase (carbon-dioxide-forming); carbonic acid hydro-lyase	carbonic acid hydro-lyase	Carbonic acid <=> CO2 + H2O	C01353 <=> C00011 + C00001	KEGG	4.2.1.1	4.2.1.1
R00134	formate:NADP+ oxidoreductase	formate:NADP+ oxidoreductase	Formate + NADP+ <=> CO2 + NADPH	C00058 + C00006 <=> C00011 + C00005	KEGG	1.2.1.43	1.2.1.43
R00135	NO NAME	NO NAME	Peptide + H2O <=> L-Proline + Peptide	C00012 + C00001 <=> C00148 + C00012	KEGG	3.4.11.5	3.4.11.5
R00137	ATP:nicotinamide-nucleotide adenylyltransferase	ATP:nicotinamide-nucleotide adenylyltransferase	ATP + Nicotinamide D-ribonucleotide <=> Diphosphate + NAD+	C00002 + C00455 <=> C00013 + C00003	KEGG	2.7.7.1，2.7.7.18	2.7.7.1
R00138	Triphosphate phosphohydrolase	Triphosphate phosphohydrolase	Triphosphate + H2O <=> Diphosphate + Orthophosphate	C00536 + C00001 <=> C00013 + C00009	KEGG	3.6.1.25	3.6.1.25
R00139	ATP:2'-deoxy-5-hydroxymethylcytidine-5'-diphosphate phosphotransferase	ATP:2'-deoxy-5-hydroxymethylcytidine-5'-diphosphate phosphotransferase	2'-Deoxy-5-hydroxymethylcytidine-5'-diphosphate + ATP <=> 2'-Deoxy-5-hydroxymethylcytidine-5'-triphosphate + ADP	C11038 + C00002 <=> C11039 + C00008	KEGG	2.7.4.6	2.7.4.6
R00140	ATP:5-hydroxymethyldeoxycytidylate phosphotransferase	ATP:5-hydroxymethyldeoxycytidylate phosphotransferase	2'-Deoxy-5-hydroxymethylcytidine-5'-diphosphate + ADP <=> 5-Hydroxymethyldeoxycytidylate + ATP	C11038 + C00008 <=> C03997 + C00002	KEGG	2.7.4.12	2.7.4.12
R00141	ATP:ammonia phosphotransferase	ATP:ammonia phosphotransferase	ATP + NH3 <=> ADP + Phosphoramidate	C00002 + C00014 <=> C00008 + C02306	KEGG	2.7.3.8	2.7.3.8
R00143	ammonia:NAD+ oxidoreductase; NADH:hydroxylamine oxidoreductase	ammonia:NAD+ oxidoreductase;	NH3 + NAD+ + H2O <=> Hydroxylamine + NADH + H+	C00014 + C00003 + C00001 <=> C00192 + C00004 + C00080	KEGG	1.7.1.10，1.7.99.1	1.7.1.10
R00145	alpha-amino acid:NAD+ oxidoreductase (deaminating)	alpha-amino acid:NAD+ oxidoreductase (deaminating)	alpha-Amino acid + H2O + NAD+ <=> 2-Oxo acid + NH3 + NADH + H+	C05167 + C00001 + C00003 <=> C00161 + C00014 + C00004 + C00080	KEGG	1.4.1.1，1.4.1.2，1.4.1.3，1.4.1.4，1.4.1.5，1.4.1.7，1.4.1.8，1.4.1.9，1.4.1.10，1.4.1.12，1.4.1.15，1.4.1.19，1.4.1.20	1.4.1.1
R00146	alpha-amino acid:NADP+ oxidoreductase (deaminating)	alpha-amino acid:NADP+ oxidoreductase (deaminating)	alpha-Amino acid + H2O + NADP+ <=> 2-Oxo acid + NH3 + NADPH + H+	C05167 + C00001 + C00006 <=> C00161 + C00014 + C00005 + C00080	KEGG	1.4.1.1，1.4.1.2，1.4.1.3，1.4.1.4，1.4.1.5，1.4.1.7，1.4.1.8，1.4.1.9，1.4.1.10，1.4.1.12，1.4.1.15，1.4.1.19，1.4.1.20	1.4.1.1
R00148	ammonia,ubiquinol:oxygen oxidoreductase; ammonia monooxygenase	ammonia monooxygenase	NH3 + Oxygen + Ubiquinol <=> Hydroxylamine + H2O + Ubiquinone	C00014 + C00007 + C00390 <=> C00192 + C00001 + C00399	KEGG	1.13.12.-	1.13.12.-
R00149	Carbon-dioxide:ammonia ligase (ADP-forming,carbamate-phosphorylating)	Carbon-dioxide:ammonia ligase (ADP-forming,carbamate-phosphorylating)	2 ATP + NH3 + CO2 + H2O <=> 2 ADP + Orthophosphate + Carbamoyl phosphate	2 C00002 + C00014 + C00011 + C00001 <=> 2 C00008 + C00009 + C00169	KEGG	6.3.4.16	6.3.4.16
R00150	ATP:carbamate phosphotransferase	ATP:carbamate phosphotransferase	ATP + NH3 + CO2 <=> ADP + Carbamoyl phosphate	C00002 + C00014 + C00011 <=> C00008 + C00169	KEGG	2.7.2.2	2.7.2.2
R00152	NO NAME	NO NAME	NH3 + CO2 <=> Cyanide	C00014 + C00011 <=> C00177	KEGG
R00153	Reduced ferredoxin:dinitrogen oxidoreductase (ATP-hydrolysing)	Reduced ferredoxin:dinitrogen oxidoreductase (ATP-hydrolysing)	Hydrazine + 2 e- + 2 H+ <=> 2 NH3	C05361 + 2 C05359 + 2 C00080 <=> 2 C00014	KEGG	1.18.6.1	1.18.6.1
R00155	UDP phosphohydrolase	UDP phosphohydrolase	UDP + H2O <=> UMP + Orthophosphate	C00015 + C00001 <=> C00105 + C00009	KEGG	3.6.1.5，3.6.1.6	3.6.1.5
R00156	ATP:UDP phosphotransferase	ATP:UDP phosphotransferase	ATP + UDP <=> ADP + UTP	C00002 + C00015 <=> C00008 + C00075	KEGG	2.7.4.6	2.7.4.6
R00157	Uridine triphosphate:AMP phosphotransferase; UTP:AMP phosphotransferase	UTP:AMP phosphotransferase	UTP + AMP <=> UDP + ADP	C00075 + C00020 <=> C00015 + C00008	KEGG	2.7.4.10	2.7.4.10
R00158	ATP:UMP phosphotransferase	ATP:UMP phosphotransferase	ATP + UMP <=> ADP + UDP	C00002 + C00105 <=> C00008 + C00015	KEGG	2.7.4.4，2.7.4.14，2.7.4.22	2.7.4.4
R00159	UTP phosphohydrolase	UTP phosphohydrolase	UTP + H2O <=> UDP + Orthophosphate	C00075 + C00001 <=> C00015 + C00009	KEGG	3.6.1.5，3.6.1.39	3.6.1.5
R00160	FAD nucleotidohydrolase	FAD nucleotidohydrolase	FAD + H2O <=> AMP + FMN	C00016 + C00001 <=> C00020 + C00061	KEGG	3.6.1.9，3.6.1.18	3.6.1.9
R00161	ATP:FMN adenylyltransferase	ATP:FMN adenylyltransferase	ATP + FMN <=> Diphosphate + FAD	C00002 + C00061 <=> C00013 + C00016	KEGG	2.7.7.2	2.7.7.2
R00162	ATP:protein phosphotransferase; ATP:protein phosphotransferase (Ca2+/calmodulin-dependent)	ATP:protein phosphotransferase	ATP + Protein <=> ADP + Phosphoprotein	C00002 + C00017 <=> C00008 + C00562	KEGG	2.7.11.1，2.7.11.8，2.7.11.9，2.7.11.10，2.7.11.11，2.7.11.12，2.7.11.13，2.7.11.17，2.7.11.21，2.7.11.22，2.7.11.24，2.7.11.25，2.7.11.30，2.7.12.1，2.7.12.2	2.7.11.1
R00164	Phosphoprotein phosphohydrolase	Phosphoprotein phosphohydrolase	Phosphoprotein + H2O <=> Protein + Orthophosphate	C00562 + C00001 <=> C00017 + C00009	KEGG	3.1.3.16	3.1.3.16
R00165	NO NAME	NO NAME	Protein <=> L-Alanyl-tRNA	C00017 <=> C00886	KEGG
R00166	NO NAME	NO NAME	Protein <=> L-Leucyl-tRNA	C00017 <=> C02047	KEGG
R00167	NO NAME	NO NAME	L-Arginyl-tRNA(Arg) <=> Protein-L-arginine	C02163 <=> C00613	KEGG
R00168	NO NAME	NO NAME	Protein <=> L-Valyl-tRNA(Val)	C00017 <=> C02554	KEGG
R00169	NO NAME	NO NAME	Protein <=> L-Glutamyl-tRNA(Glu)	C00017 <=> C02987	KEGG
R00170	NO NAME	NO NAME	Protein <=> L-Isoleucyl-tRNA(Ile)	C00017 <=> C03127	KEGG
R00171	NO NAME	NO NAME	L-Selenocysteinyl-tRNA(Sec) <=> Protein L-selenocysteine	C06482 <=> C16824	KEGG
R00172	NO NAME	NO NAME	Protein <=> Selenomethionyl-tRNA(Met)	C00017 <=> C05336	KEGG
R00173	pyridoxal-5'-phosphate phosphohydrolase	pyridoxal-5'-phosphate phosphohydrolase	Pyridoxal phosphate + H2O <=> Pyridoxal + Orthophosphate	C00018 + C00001 <=> C00250 + C00009	KEGG	3.1.3.74	3.1.3.74
R00174	ATP:pyridoxal 5'-phosphotransferase	ATP:pyridoxal 5'-phosphotransferase	ATP + Pyridoxal <=> ADP + Pyridoxal phosphate	C00002 + C00250 <=> C00008 + C00018	KEGG	2.7.1.35	2.7.1.35
R00175	S-Adenosyl-L-methionine hydrolase	S-Adenosyl-L-methionine hydrolase	S-Adenosyl-L-methionine + H2O <=> 5'-Methylthioadenosine + L-Homoserine	C00019 + C00001 <=> C00170 + C00263	KEGG	3.3.1.2	3.3.1.2
R00177	ATP:L-methionine S-adenosyltransferase	ATP:L-methionine S-adenosyltransferase	Orthophosphate + Diphosphate + S-Adenosyl-L-methionine <=> ATP + L-Methionine + H2O	C00009 + C00013 + C00019 <=> C00002 + C00073 + C00001	KEGG	2.5.1.6	2.5.1.6
R00178	S-adenosyl-L-methionine carboxy-lyase [(5-deoxy-5-adenosyl)(3-aminopropyl)methylsulfonium-forming]	S-adenosyl-L-methionine carboxy-lyase [(5-deoxy-5-adenosyl)(3-aminopropyl)methylsulfonium-forming]	S-Adenosyl-L-methionine + H+ <=> S-Adenosylmethioninamine + CO2	C00019 + C00080 <=> C01137 + C00011	KEGG	4.1.1.50	4.1.1.50
R00179	S-adenosyl-L-methionine methylthioadenosine-lyase (1-aminocyclopropane-1-carboxylate-forming)	S-adenosyl-L-methionine methylthioadenosine-lyase (1-aminocyclopropane-1-carboxylate-forming)	S-Adenosyl-L-methionine <=> 1-Aminocyclopropane-1-carboxylate + 5'-Methylthioadenosine	C00019 <=> C01234 + C00170	KEGG	4.4.1.14	4.4.1.14
R00180	S-Adenosyl-L-methionine alkyltransferase (cyclizing)	S-Adenosyl-L-methionine alkyltransferase (cyclizing)	S-Adenosyl-L-methionine <=> 5'-Methylthioadenosine + 2-Aminobutan-4-olide	C00019 <=> C00170 + C02926	KEGG	2.5.1.4	2.5.1.4
R00181	AMP aminohydrolase	AMP aminohydrolase	AMP + H2O <=> IMP + NH3	C00020 + C00001 <=> C00130 + C00014	KEGG	3.5.4.6，3.5.4.17	3.5.4.6
R00182	AMP phosphoribohydrolase	AMP phosphoribohydrolase	AMP + H2O <=> Adenine + D-Ribose 5-phosphate	C00020 + C00001 <=> C00147 + C00117	KEGG	3.2.2.4	3.2.2.4
R00183	Adenosine 5'-monophosphate phosphohydrolase	Adenosine 5'-monophosphate phosphohydrolase	AMP + H2O <=> Adenosine + Orthophosphate	C00020 + C00001 <=> C00212 + C00009	KEGG	3.1.3.5	3.1.3.5
R00184	P1,P4-bis(5'-adenosyl)-tetraphosphate adenylohydrolase	P1,P4-bis(5'-adenosyl)-tetraphosphate adenylohydrolase	P1,P4-Bis(5'-adenosyl) tetraphosphate + H2O <=> ATP + AMP	C01260 + C00001 <=> C00002 + C00020	KEGG	3.6.1.17	3.6.1.17
R00185	ATP:adenosine 5'-phosphotransferase	ATP:adenosine 5'-phosphotransferase	ATP + Adenosine <=> ADP + AMP	C00002 + C00212 <=> C00008 + C00020	KEGG	2.7.1.20，2.7.1.74	2.7.1.20
R00187	P1,P3-bis(5'-adenosyl)-triphosphate adenylohydrolase	P1,P3-bis(5'-adenosyl)-triphosphate adenylohydrolase	P1,P3-Bis(5'-adenosyl) triphosphate + H2O <=> ADP + AMP	C06197 + C00001 <=> C00008 + C00020	KEGG	3.6.1.29	3.6.1.29
R00188	Adenosine 3',5'-bisphosphate 3'-phosphohydrolase	Adenosine 3',5'-bisphosphate 3'-phosphohydrolase	Adenosine 3',5'-bisphosphate + H2O <=> AMP + Orthophosphate	C00054 + C00001 <=> C00020 + C00009	KEGG	3.1.3.7	3.1.3.7
R00189	deamido-NAD+:ammonia ligase (AMP-forming)	deamido-NAD+:ammonia ligase (AMP-forming)	ATP + Deamino-NAD+ + NH3 <=> AMP + Diphosphate + NAD+	C00002 + C00857 + C00014 <=> C00020 + C00013 + C00003	KEGG	6.3.1.5，6.3.5.1	6.3.1.5
R00190	AMP:diphosphate phospho-D-ribosyltransferase	AMP:diphosphate phospho-D-ribosyltransferase	AMP + Diphosphate <=> Adenine + 5-Phospho-alpha-D-ribose 1-diphosphate	C00020 + C00013 <=> C00147 + C00119	KEGG	2.4.2.7，2.4.2.8	2.4.2.7
R00191	adenosine 3',5'-phosphate 5'-nucleotidohydrolase	adenosine 3',5'-phosphate 5'-nucleotidohydrolase	3',5'-Cyclic AMP + H2O <=> AMP	C00575 + C00001 <=> C00020	KEGG	3.1.4.17，3.1.4.53	3.1.4.17
R00192	S-Adenosyl-L-homocysteine hydrolase	S-Adenosyl-L-homocysteine hydrolase	S-Adenosyl-L-homocysteine + H2O <=> Adenosine + L-Homocysteine	C00021 + C00001 <=> C00212 + C00155	KEGG	3.3.1.1	3.3.1.1
R00193	S-Adenosyl-L-homocysteine aminohydrolase	S-Adenosyl-L-homocysteine aminohydrolase	S-Adenosyl-L-homocysteine + H2O <=> S-Inosyl-L-homocysteine + NH3	C00021 + C00001 <=> C03431 + C00014	KEGG	3.5.4.28	3.5.4.28
R00194	S-Adenosyl-L-homocysteine homocysteinylribohydrolase	S-Adenosyl-L-homocysteine homocysteinylribohydrolase	S-Adenosyl-L-homocysteine + H2O <=> S-Ribosyl-L-homocysteine + Adenine	C00021 + C00001 <=> C03539 + C00147	KEGG	3.2.2.9	3.2.2.9
R00195	2,3-diaminopropanoate ammonia-lyase (adding water; pyruvate-forming)	2,3-diaminopropanoate ammonia-lyase (adding water; pyruvate-forming)	2,3-Diaminopropanoate + H2O <=> Pyruvate + 2 NH3	C06393 + C00001 <=> C00022 + 2 C00014	KEGG	4.3.1.15	4.3.1.15
R00196	(S)-Lactate:ferricytochrome-c 2-oxidoreductase	(S)-Lactate:ferricytochrome-c 2-oxidoreductase	(S)-Lactate + 2 Ferricytochrome c <=> Pyruvate + 2 Ferrocytochrome c + 2 H+	C00186 + 2 C00125 <=> C00022 + 2 C00126 + 2 C00080	KEGG	1.1.2.3	1.1.2.3
R00197	(R)-Lactate:ferricytochrome-c 2-oxidoreductase	(R)-Lactate:ferricytochrome-c 2-oxidoreductase	(R)-Lactate + 2 Ferricytochrome c <=> Pyruvate + 2 Ferrocytochrome c + 2 H+	C00256 + 2 C00125 <=> C00022 + 2 C00126 + 2 C00080	KEGG	1.1.2.4	1.1.2.4
R00198	(R)-Lactate:ferricytochrome-c-553 2-oxidoreductase	(R)-Lactate:ferricytochrome-c-553 2-oxidoreductase	(R)-Lactate + 2 Ferricytochrome c-553 <=> Pyruvate + 2 Ferrocytochrome c-553	C00256 + 2 C01070 <=> C00022 + 2 C01071	KEGG	1.1.2.5	1.1.2.5
R00199	ATP:pyruvate,water phosphotransferase	ATP:pyruvate,water phosphotransferase	ATP + Pyruvate + H2O <=> AMP + Phosphoenolpyruvate + Orthophosphate	C00002 + C00022 + C00001 <=> C00020 + C00074 + C00009	KEGG	2.7.9.2	2.7.9.2
R00200	ATP:pyruvate 2-O-phosphotransferase	ATP:pyruvate 2-O-phosphotransferase	ATP + Pyruvate <=> ADP + Phosphoenolpyruvate	C00002 + C00022 <=> C00008 + C00074	KEGG	2.7.1.40	2.7.1.40
R00203	pyruvaldehyde:NAD+ oxidoreductase; 2-oxopropanal:NAD+ oxidoreductase	pyruvaldehyde:NAD+ oxidoreductase	Methylglyoxal + NAD+ + H2O <=> Pyruvate + NADH + H+	C00546 + C00003 + C00001 <=> C00022 + C00004 + C00080	KEGG	1.2.1.22，1.2.1.23	1.2.1.22
R00205	2-Oxopropanal:NADP+ oxidoreductase	2-Oxopropanal:NADP+ oxidoreductase	Methylglyoxal + NADP+ + H2O <=> Pyruvate + NADPH + H+	C00546 + C00006 + C00001 <=> C00022 + C00005 + C00080	KEGG	1.2.1.49	1.2.1.49
R00206	ATP:pyruvate,phosphate phosphotransferase	ATP:pyruvate,phosphate phosphotransferase	ATP + Pyruvate + Orthophosphate <=> AMP + Phosphoenolpyruvate + Diphosphate	C00002 + C00022 + C00009 <=> C00020 + C00074 + C00013	KEGG	2.7.9.1	2.7.9.1
R00207	Pyruvate:oxygen 2-oxidoreductase (phosphorylating)	Pyruvate:oxygen 2-oxidoreductase (phosphorylating)	Pyruvate + Orthophosphate + Oxygen <=> Acetyl phosphate + Hydrogen peroxide + CO2	C00022 + C00009 + C00007 <=> C00227 + C00027 + C00011	KEGG	1.2.3.3	1.2.3.3
R00208	Phosphoenolpyruvate phosphohydrolase	Phosphoenolpyruvate phosphohydrolase	Phosphoenolpyruvate + H2O <=> Pyruvate + Orthophosphate	C00074 + C00001 <=> C00022 + C00009	KEGG	3.1.3.60	3.1.3.60
R00209	pyruvate:NAD+ 2-oxidoreductase (CoA-acetylating); pyruvate dehydrogenase complex	pyruvate dehydrogenase complex	Pyruvate + CoA + NAD+ <=> Acetyl-CoA + CO2 + NADH + H+	C00022 + C00010 + C00003 <=> C00024 + C00011 + C00004 + C00080	KEGG	1.2.4.1，1.8.1.4，2.3.1.12	1.2.4.1
R00210	pyruvate:NADP+ 2-oxidoreductase (CoA-acetylating)	pyruvate:NADP+ 2-oxidoreductase (CoA-acetylating)	Pyruvate + CoA + NADP+ <=> Acetyl-CoA + CO2 + NADPH + H+	C00022 + C00010 + C00006 <=> C00024 + C00011 + C00005 + C00080	KEGG	1.2.1.51	1.2.1.51
R00211	pyruvate:oxygen 2-oxidoreductase (CoA-acetylating)	pyruvate:oxygen 2-oxidoreductase (CoA-acetylating)	Pyruvate + CoA + Oxygen <=> Hydrogen peroxide + Acetyl-CoA + CO2	C00022 + C00010 + C00007 <=> C00027 + C00024 + C00011	KEGG	1.2.3.6	1.2.3.6
R00212	Acetyl-CoA:formate C-acetyltransferase	Acetyl-CoA:formate C-acetyltransferase	Acetyl-CoA + Formate <=> CoA + Pyruvate	C00024 + C00058 <=> C00010 + C00022	KEGG	2.3.1.54	2.3.1.54
R00213	O-carbamoyl-L-serine ammonia-lyase (decarboxylating; pyruvate-forming)	O-carbamoyl-L-serine ammonia-lyase (decarboxylating; pyruvate-forming)	O-Carbamoyl-L-serine + H2O <=> Pyruvate + 2 NH3 + CO2	C03015 + C00001 <=> C00022 + 2 C00014 + C00011	KEGG	4.3.1.13	4.3.1.13
R00214	(S)-malate:NAD+ oxidoreductase (decarboxylating)	(S)-malate:NAD+ oxidoreductase (decarboxylating)	(S)-Malate + NAD+ <=> Pyruvate + CO2 + NADH + H+	C00149 + C00003 <=> C00022 + C00011 + C00004 + C00080	KEGG	1.1.1.38，1.1.1.39	1.1.1.38
R00215	(R)-Malate:NAD+ oxidoreductase (decarboxylating)	(R)-Malate:NAD+ oxidoreductase (decarboxylating)	(R)-Malate + NAD+ <=> Pyruvate + CO2 + NADH + H+	C00497 + C00003 <=> C00022 + C00011 + C00004 + C00080	KEGG	1.1.1.83	1.1.1.83
R00216	(S)-Malate:NADP+ oxidoreductase(oxaloacetate-decarboxylating)	(S)-Malate:NADP+ oxidoreductase(oxaloacetate-decarboxylating)	(S)-Malate + NADP+ <=> Pyruvate + CO2 + NADPH + H+	C00149 + C00006 <=> C00022 + C00011 + C00005 + C00080	KEGG	1.1.1.40	1.1.1.40
R00217	oxaloacetate carboxy-lyase (pyruvate-forming)	oxaloacetate carboxy-lyase (pyruvate-forming)	Oxaloacetate <=> Pyruvate + CO2	C00036 <=> C00022 + C00011	KEGG	1.1.1.38，1.1.1.40，4.1.1.3	1.1.1.38
R00218	acetylenedicarboxylate carboxy-lyase (pyruvate-forming)	acetylenedicarboxylate carboxy-lyase (pyruvate-forming)	Acetylenedicarboxylate + H2O <=> Pyruvate + CO2	C03248 + C00001 <=> C00022 + C00011	KEGG	4.1.1.78	4.1.1.78
R00219	2-Hydroxyethylenedicarboxylate carboxy-lyase (pyruvate-forming)	2-Hydroxyethylenedicarboxylate carboxy-lyase (pyruvate-forming)	Pyruvate + CO2 <=> 2-Hydroxyethylenedicarboxylate	C00022 + C00011 <=> C03981	KEGG	4.1.1.-	4.1.1.-
R00220	L-serine ammonia-lyase	L-serine ammonia-lyase	L-Serine <=> Pyruvate + NH3	C00065 <=> C00022 + C00014	KEGG	4.3.1.17，4.3.1.19	4.3.1.17
R00221	D-serine ammonia-lyase	D-serine ammonia-lyase	D-Serine <=> Pyruvate + NH3	C00740 <=> C00022 + C00014	KEGG	4.3.1.18	4.3.1.18
R00223	serine ammonia-lyase (pyruvate-forming)	serine ammonia-lyase (pyruvate-forming)	DL-Serine <=> Pyruvate + NH3	C00716 <=> C00022 + C00014	KEGG	4.3.1.15	4.3.1.15
R00224	pyruvate carboxy-lyase (acetaldehyde-forming)	pyruvate carboxy-lyase (acetaldehyde-forming)	Pyruvate <=> Acetaldehyde + CO2	C00022 <=> C00084 + C00011	KEGG	4.1.1.1	4.1.1.1
R00226	pyruvate:pyruvate acetaldehydetransferase (decarboxylating); (S)-2-acetolactate pyruvate-lyase (carboxylating)	pyruvate:pyruvate acetaldehydetransferase (decarboxylating)	(S)-2-Acetolactate + CO2 <=> 2 Pyruvate	C06010 + C00011 <=> 2 C00022	KEGG	2.2.1.6	2.2.1.6
R00227	Acetyl-CoA hydrolase	Acetyl-CoA hydrolase	Acetyl-CoA + H2O <=> CoA + Acetate	C00024 + C00001 <=> C00010 + C00033	KEGG	3.1.2.1	3.1.2.1
R00228	acetaldehyde:NAD+ oxidoreductase (CoA-acetylating)	acetaldehyde:NAD+ oxidoreductase (CoA-acetylating)	Acetaldehyde + CoA + NAD+ <=> Acetyl-CoA + NADH + H+	C00084 + C00010 + C00003 <=> C00024 + C00004 + C00080	KEGG	1.2.1.10	1.2.1.10
R00229	Acetate:CoA ligase (ADP-forming)	Acetate:CoA ligase (ADP-forming)	ATP + Acetate + CoA <=> ADP + Acetyl-CoA + Orthophosphate	C00002 + C00033 + C00010 <=> C00008 + C00024 + C00009	KEGG	6.2.1.13	6.2.1.13
R00230	acetyl-CoA:phosphate acetyltransferase	acetyl-CoA:phosphate acetyltransferase	Acetyl-CoA + Orthophosphate <=> CoA + Acetyl phosphate	C00024 + C00009 <=> C00010 + C00227	KEGG	2.3.1.8	2.3.1.8
R00233	malonyl-CoA carboxy-lyase (acetyl-CoA-forming)	malonyl-CoA carboxy-lyase (acetyl-CoA-forming)	Malonyl-CoA <=> Acetyl-CoA + CO2	C00083 <=> C00024 + C00011	KEGG	4.1.1.9	4.1.1.9
R00234	Acetyl-CoA:peptide Nalpha-acetyltransferase	Acetyl-CoA:peptide Nalpha-acetyltransferase	Acetyl-CoA + Peptide <=> CoA + Nalpha-Acetylpeptide	C00024 + C00012 <=> C00010 + C03011	KEGG	2.3.1.88	2.3.1.88
R00235	Acetate:CoA ligase (AMP-forming)	Acetate:CoA ligase (AMP-forming)	ATP + Acetate + CoA <=> AMP + Diphosphate + Acetyl-CoA	C00002 + C00033 + C00010 <=> C00020 + C00013 + C00024	KEGG	6.2.1.1	6.2.1.1
R00236	acetyl adenylate:CoA acetyltransferase	acetyl adenylate:CoA acetyltransferase	Acetyl adenylate + CoA <=> AMP + Acetyl-CoA	C05993 + C00010 <=> C00020 + C00024	KEGG	6.2.1.1	6.2.1.1
R00237	(3S)-citramalyl-CoA pyruvate-lyase (acetyl-CoA-forming)	(3S)-citramalyl-CoA pyruvate-lyase (acetyl-CoA-forming)	(3S)-Citramalyl-CoA <=> Acetyl-CoA + Pyruvate	C01011 <=> C00024 + C00022	KEGG	4.1.3.24，4.1.3.25	4.1.3.24
R00238	Acetyl-CoA:acetyl-CoA C-acetyltransferase	Acetyl-CoA:acetyl-CoA C-acetyltransferase	2 Acetyl-CoA <=> CoA + Acetoacetyl-CoA	2 C00024 <=> C00010 + C00332	KEGG	2.3.1.9	2.3.1.9
R00239	ATP:L-glutamate 5-phosphotransferase	ATP:L-glutamate 5-phosphotransferase	ATP + L-Glutamate <=> ADP + L-Glutamyl 5-phosphate	C00002 + C00025 <=> C00008 + C03287	KEGG	2.7.2.11	2.7.2.11
R00241	ATP:L-glutamate 1-phosphotransferase	ATP:L-glutamate 1-phosphotransferase	ATP + L-Glutamate <=> ADP + L-Glutamyl 1-phosphate	C00002 + C00025 <=> C00008 + C05765	KEGG	2.7.2.13	2.7.2.13
R00243	L-Glutamate:NAD+ oxidoreductase (deaminating)	L-Glutamate:NAD+ oxidoreductase (deaminating)	L-Glutamate + NAD+ + H2O <=> 2-Oxoglutarate + NH3 + NADH + H+	C00025 + C00003 + C00001 <=> C00026 + C00014 + C00004 + C00080	KEGG	1.4.1.2，1.4.1.3	1.4.1.2
R00245	L-Glutamate 5-semialdehyde:NAD+ oxidoreductase	L-Glutamate 5-semialdehyde:NAD+ oxidoreductase	L-Glutamate 5-semialdehyde + NAD+ + H2O <=> L-Glutamate + NADH + H+	C01165 + C00003 + C00001 <=> C00025 + C00004 + C00080	KEGG	1.5.1.12	1.5.1.12
R00248	L-Glutamate:NADP+ oxidoreductase (deaminating)	L-Glutamate:NADP+ oxidoreductase (deaminating)	L-Glutamate + NADP+ + H2O <=> 2-Oxoglutarate + NH3 + NADPH + H+	C00025 + C00006 + C00001 <=> C00026 + C00014 + C00005 + C00080	KEGG	1.4.1.3，1.4.1.4	1.4.1.3
R00250	L-Glutamate:oxygen oxidoreductase (deaminating)	L-Glutamate:oxygen oxidoreductase (deaminating)	L-Glutamate + Oxygen + H2O <=> 2-Oxoglutarate + NH3 + Hydrogen peroxide	C00025 + C00007 + C00001 <=> C00026 + C00014 + C00027	KEGG	1.4.3.11	1.4.3.11
R00251	5-oxo-L-proline amidohydrolase (ATP-hydrolysing)	5-oxo-L-proline amidohydrolase (ATP-hydrolysing)	ATP + 5-Oxoproline + 2 H2O <=> ADP + Orthophosphate + L-Glutamate	C00002 + C01879 + 2 C00001 <=> C00008 + C00009 + C00025	KEGG	3.5.2.9	3.5.2.9
R00253	L-Glutamate:ammonia ligase (ADP-forming)	L-Glutamate:ammonia ligase (ADP-forming)	ATP + L-Glutamate + NH3 <=> ADP + Orthophosphate + L-Glutamine	C00002 + C00025 + C00014 <=> C00008 + C00009 + C00064	KEGG	6.3.1.2	6.3.1.2
R00254	N-carbamyl-L-glutamate amidohydrolase	N-carbamyl-L-glutamate amidohydrolase	L-Glutamate + NH3 + CO2 <=> N-Carbamyl-L-glutamate + H2O	C00025 + C00014 + C00011 <=> C05829 + C00001	KEGG	3.5.1.87	3.5.1.87
R00256	L-Glutamine amidohydrolase	L-Glutamine amidohydrolase	L-Glutamine + H2O <=> L-Glutamate + NH3	C00064 + C00001 <=> C00025 + C00014	KEGG	3.5.1.2，3.5.1.38，6.3.5.4，6.3.5.5	3.5.1.2
R00257	Deamido-NAD+:L-glutamine amido-ligase (AMP-forming)	Deamido-NAD+:L-glutamine amido-ligase (AMP-forming)	ATP + Deamino-NAD+ + L-Glutamine + H2O <=> AMP + Diphosphate + NAD+ + L-Glutamate	C00002 + C00857 + C00064 + C00001 <=> C00020 + C00013 + C00003 + C00025	KEGG	6.3.5.1	6.3.5.1
R00258	L-Alanine:2-oxoglutarate aminotransferase	L-Alanine:2-oxoglutarate aminotransferase	L-Alanine + 2-Oxoglutarate <=> Pyruvate + L-Glutamate	C00041 + C00026 <=> C00022 + C00025	KEGG	2.6.1.2	2.6.1.2
R00259	acetyl-CoA:L-glutamate N-acetyltransferase	acetyl-CoA:L-glutamate N-acetyltransferase	Acetyl-CoA + L-Glutamate <=> CoA + N-Acetyl-L-glutamate	C00024 + C00025 <=> C00010 + C00624	KEGG	2.3.1.1	2.3.1.1
R00260	glutamate racemase	glutamate racemase	L-Glutamate <=> D-Glutamate	C00025 <=> C00217	KEGG	5.1.1.3	5.1.1.3
R00261	L-glutamate 1-carboxy-lyase (4-aminobutanoate-forming)	L-glutamate 1-carboxy-lyase (4-aminobutanoate-forming)	L-Glutamate <=> 4-Aminobutanoate + CO2	C00025 <=> C00334 + C00011	KEGG	4.1.1.15	4.1.1.15
R00262	L-threo-3-Methylaspartate carboxy-aminomethylmutase	L-threo-3-Methylaspartate carboxy-aminomethylmutase	L-threo-3-Methylaspartate <=> L-Glutamate	C03618 <=> C00025	KEGG	5.4.99.1	5.4.99.1
R00263	NO NAME	NO NAME	L-Glutamate <=> Poly-gamma-D-glutamate	C00025 <=> C05723	KEGG
R00264	2,5-dioxopentanoate:NADP+ 5-oxidoreductase	2,5-dioxopentanoate:NADP+ 5-oxidoreductase	2,5-Dioxopentanoate + NADP+ + H2O <=> 2-Oxoglutarate + NADPH + H+	C00433 + C00006 + C00001 <=> C00026 + C00005 + C00080	KEGG	1.2.1.3，1.2.1.26	1.2.1.3
R00265	2-oxoglutarate:NADP+ 2-oxidoreductase (CoA-succinylating)	2-oxoglutarate:NADP+ 2-oxidoreductase (CoA-succinylating)	2-Oxoglutarate + CoA + NADP+ <=> Succinyl-CoA + CO2 + NADPH + H+	C00026 + C00010 + C00006 <=> C00091 + C00011 + C00005 + C00080	KEGG	1.2.1.52	1.2.1.52
R00267	Isocitrate:NADP+ oxidoreductase (decarboxylating)	Isocitrate:NADP+ oxidoreductase (decarboxylating)	Isocitrate + NADP+ <=> 2-Oxoglutarate + CO2 + NADPH + H+	C00311 + C00006 <=> C00026 + C00011 + C00005 + C00080	KEGG	1.1.1.42	1.1.1.42
R00268	oxalosuccinate carboxy-lyase (2-oxoglutarate-forming)	oxalosuccinate carboxy-lyase (2-oxoglutarate-forming)	Oxalosuccinate <=> 2-Oxoglutarate + CO2	C05379 <=> C00026 + C00011	KEGG	1.1.1.42	1.1.1.42
R00269	2-oxoglutaramate amidohydrolase	2-oxoglutaramate amidohydrolase	2-Oxoglutaramate + H2O <=> 2-Oxoglutarate + NH3	C00940 + C00001 <=> C00026 + C00014	KEGG	3.5.1.3	3.5.1.3
R00270	NO NAME	NO NAME	2-Oxoglutarate + NH3 <=> 4-Oxoglutaramate + H2O	C00026 + C00014 <=> C05572 + C00001	KEGG
R00271	acetyl-CoA:2-oxoglutarate C-acetyltransferase (thioester-hydrolysing, carboxymethyl forming)	acetyl-CoA:2-oxoglutarate C-acetyltransferase (thioester-hydrolysing, carboxymethyl forming)	Acetyl-CoA + H2O + 2-Oxoglutarate <=> (R)-2-Hydroxybutane-1,2,4-tricarboxylate + CoA	C00024 + C00001 + C00026 <=> C01251 + C00010	KEGG	2.3.3.14	2.3.3.14
R00272	2-Oxoglutarate carboxy-lyase	2-Oxoglutarate carboxy-lyase	2-Oxoglutarate <=> Succinate semialdehyde + CO2	C00026 <=> C00232 + C00011	KEGG	4.1.1.71	4.1.1.71
R00273	oxalate:oxygen oxidoreductase	oxalate:oxygen oxidoreductase	Oxalate + Oxygen <=> Hydrogen peroxide + 2 CO2	C00209 + C00007 <=> C00027 + 2 C00011	KEGG	1.2.3.4	1.2.3.4
R00274	glutathione:hydrogen-peroxide oxidoreductase	glutathione:hydrogen-peroxide oxidoreductase	Hydrogen peroxide + 2 Glutathione <=> Glutathione disulfide + 2 H2O	C00027 + 2 C00051 <=> C00127 + 2 C00001	KEGG	1.11.1.9	1.11.1.9
R00275	superoxide:superoxide oxidoreductase	superoxide:superoxide oxidoreductase	2 O2.- + 2 H+ <=> Hydrogen peroxide + Oxygen	2 C00704 + 2 C00080 <=> C00027 + C00007	KEGG	1.15.1.1	1.15.1.1
R00276	Carbon-monoxide:oxygen oxidoreductase	Carbon-monoxide:oxygen oxidoreductase	CO2 + Hydrogen peroxide <=> CO + H2O + Oxygen	C00011 + C00027 <=> C00237 + C00001 + C00007	KEGG	1.2.2.4	1.2.2.4
R00277	Pyridoxamine-5'-phosphate:oxygen oxidoreductase (deaminating)	Pyridoxamine-5'-phosphate:oxygen oxidoreductase (deaminating)	Pyridoxamine phosphate + H2O + Oxygen <=> Pyridoxal phosphate + NH3 + Hydrogen peroxide	C00647 + C00001 + C00007 <=> C00018 + C00014 + C00027	KEGG	1.4.3.5	1.4.3.5
R00278	Pyridoxine 5-phosphate:oxygen oxidoreductase	Pyridoxine 5-phosphate:oxygen oxidoreductase	Pyridoxine phosphate + Oxygen <=> Hydrogen peroxide + Pyridoxal phosphate	C00627 + C00007 <=> C00027 + C00018	KEGG	1.4.3.5	1.4.3.5
R00279	D-Glutamate:oxygen oxidoreductase (deaminating)	D-Glutamate:oxygen oxidoreductase (deaminating)	D-Glutamate + H2O + Oxygen <=> 2-Oxoglutarate + NH3 + Hydrogen peroxide	C00217 + C00001 + C00007 <=> C00026 + C00014 + C00027	KEGG	1.4.3.7，1.4.3.15	1.4.3.7
R00280	Nitric-oxide:acceptor oxidoreductase	Nitric-oxide:acceptor oxidoreductase	Acceptor + 2 Nitric oxide + 2 H2O <=> Reduced acceptor + 2 Nitrite	C00028 + 2 C00533 + 2 C00001 <=> C00030 + 2 C00088	KEGG	1.7.2.1	1.7.2.1
R00281	NADH:acceptor oxidoreductase	NADH:acceptor oxidoreductase	Acceptor + NADH + H+ <=> Reduced acceptor + NAD+	C00028 + C00004 + C00080 <=> C00030 + C00003	KEGG	1.6.99.3，1.6.99.5	1.6.99.3
R00282	NADPH:acceptor oxidoreductase	NADPH:acceptor oxidoreductase	Acceptor + NADPH + H+ <=> Reduced acceptor + NADP+	C00028 + C00005 + C00080 <=> C00030 + C00006	KEGG	1.6.99.1，1.6.99.6	1.6.99.1
R00283	ammonium:acceptor oxidoreductase (ATP-forming)	ammonium:acceptor oxidoreductase (ATP-forming)	Acceptor + NH3 + H2O + 2 Orthophosphate + 2 ADP <=> Hydroxylamine + Reduced acceptor + 2 ATP + 2 H2O	C00028 + C00014 + C00001 + 2 C00009 + 2 C00008 <=> C00192 + C00030 + 2 C00002 + 2 C00001	KEGG	1.3.99.15	1.3.99.15
R00284	ammonia:acceptor oxidoreductase	ammonia:acceptor oxidoreductase	Acceptor + NH3 + H2O <=> Hydroxylamine + Reduced acceptor	C00028 + C00014 + C00001 <=> C00192 + C00030	KEGG	1.7.99.1	1.7.99.1
R00286	UDP-glucose:NAD+ 6-oxidoreductase	UDP-glucose:NAD+ 6-oxidoreductase	UDP-glucose + H2O + 2 NAD+ <=> UDP-glucuronate + 2 NADH + 2 H+	C00029 + C00001 + 2 C00003 <=> C00167 + 2 C00004 + 2 C00080	KEGG	1.1.1.22	1.1.1.22
R00287	UDP-glucose glucophosphohydrolase	UDP-glucose glucophosphohydrolase	UDP-glucose + H2O <=> UMP + D-Glucose 1-phosphate	C00029 + C00001 <=> C00105 + C00103	KEGG	3.6.1.8，3.6.1.9，3.6.1.45	3.6.1.8
R00289	UTP:alpha-D-glucose-1-phosphate uridylyltransferase	UTP:alpha-D-glucose-1-phosphate uridylyltransferase	UTP + D-Glucose 1-phosphate <=> Diphosphate + UDP-glucose	C00075 + C00103 <=> C00013 + C00029	KEGG	2.7.7.9	2.7.7.9
R00291	UDP-glucose 4-epimerase	UDP-glucose 4-epimerase	UDP-glucose <=> UDP-D-galactose	C00029 <=> C00052	KEGG	5.1.3.2	5.1.3.2
R00292	UDP-glucose:glycogen 4-alpha-D-glucosyltransferase	UDP-glucose:glycogen 4-alpha-D-glucosyltransferase	UDP-glucose + Amylose <=> UDP + Amylose	C00029 + C00718 <=> C00015 + C00718	KEGG	2.4.1.11	2.4.1.11
R00293	UDP-glucose 4,6-hydro-lyase (UDP-4-dehydro-6-deoxy-D-glucose-forming)	UDP-glucose 4,6-hydro-lyase (UDP-4-dehydro-6-deoxy-D-glucose-forming)	UDP-glucose <=> UDP-4-dehydro-6-deoxy-D-glucose + H2O	C00029 <=> C04089 + C00001	KEGG	4.2.1.76	4.2.1.76
R00294	nitrous-oxide:acceptor oxidoreductase (NO-forming)	nitrous-oxide:acceptor oxidoreductase (NO-forming)	Reduced acceptor + 2 Nitric oxide <=> Nitrous oxide + Acceptor + H2O	C00030 + 2 C00533 <=> C00887 + C00028 + C00001	KEGG	1.7.99.7	1.7.99.7
R00295	Trithionate: (acceptor) oxidoreductase	Trithionate: (acceptor) oxidoreductase	Trithionate + HO- + Acceptor + 2 H2O <=> Reduced acceptor + 3 HSO3-	C01861 + C01328 + C00028 + 2 C00001 <=> C00030 + 3 C11481	KEGG	1.8.99.3	1.8.99.3
R00296	carbon-monoxide:acceptor oxidoreductase	carbon-monoxide:acceptor oxidoreductase	CO + H2O + Acceptor <=> CO2 + Reduced acceptor	C00237 + C00001 + C00028 <=> C00011 + C00030	KEGG	1.2.99.2	1.2.99.2
R00297	(R)-2-hydroxy-acid:acceptor 2-oxidoreductase	(R)-2-hydroxy-acid:acceptor 2-oxidoreductase	(R)-Lactate + Acceptor <=> Pyruvate + Reduced acceptor	C00256 + C00028 <=> C00022 + C00030	KEGG	1.1.99.6	1.1.99.6
R00298	(S)-2-hydroxyglutarate:acceptor 2-oxidoreductase	(S)-2-hydroxyglutarate:acceptor 2-oxidoreductase	(S)-2-Hydroxyglutarate + Acceptor <=> 2-Oxoglutarate + Reduced acceptor	C03196 + C00028 <=> C00026 + C00030	KEGG	1.1.99.2	1.1.99.2
R00299	ATP:D-glucose 6-phosphotransferase	ATP:D-glucose 6-phosphotransferase	ATP + D-Glucose <=> ADP + D-Glucose 6-phosphate	C00002 + C00031 <=> C00008 + C00092	KEGG	2.7.1.1，2.7.1.2	2.7.1.1
R00300	D-Glucose:NAD+ 1-oxidoreductase	D-Glucose:NAD+ 1-oxidoreductase	D-Glucose + NAD+ <=> D-Glucono-1,5-lactone + NADH + H+	C00031 + C00003 <=> C00198 + C00004 + C00080	KEGG	1.1.1.118，1.1.1.121	1.1.1.118
R00301	D-Glucose:NADP+ 1-oxidoreductase	D-Glucose:NADP+ 1-oxidoreductase	D-Glucose + NADP+ <=> D-Glucono-1,4-lactone + NADPH + H+	C00031 + C00006 <=> C03107 + C00005 + C00080	KEGG	1.1.1.119	1.1.1.119
R00302	D-glucose:oxygen 2-oxidoreductase	D-glucose:oxygen 2-oxidoreductase	D-Glucose + Oxygen <=> 2-Dehydro-D-glucose + Hydrogen peroxide	C00031 + C00007 <=> C02779 + C00027	KEGG	1.1.3.10	1.1.3.10
R00303	D-Glucose-6-phosphate phosphohydrolase	D-Glucose-6-phosphate phosphohydrolase	D-Glucose 6-phosphate + H2O <=> D-Glucose + Orthophosphate	C00092 + C00001 <=> C00031 + C00009	KEGG	3.1.3.9，3.1.3.58	3.1.3.9
R00304	D-Glucose-1-phosphate phosphohydrolase	D-Glucose-1-phosphate phosphohydrolase	D-Glucose 1-phosphate + H2O <=> D-Glucose + Orthophosphate	C00103 + C00001 <=> C00031 + C00009	KEGG	3.1.3.10	3.1.3.10
R00305	D-glucose:acceptor 1-oxidoreductase	D-glucose:acceptor 1-oxidoreductase	D-Glucose + Acceptor <=> D-Glucono-1,5-lactone + Reduced acceptor	C00031 + C00028 <=> C00198 + C00030	KEGG	1.1.99.10	1.1.99.10
R00306	cellobiose glucohydrolase	cellobiose glucohydrolase	Cellobiose + H2O <=> 2 D-Glucose	C00185 + C00001 <=> 2 C00031	KEGG	3.2.1.21，3.2.1.74	3.2.1.21
R00307	D-glucose aldose-ketose-isomerase	D-glucose aldose-ketose-isomerase	D-Glucose <=> D-Fructose	C00031 <=> C00095	KEGG	5.3.1.5	5.3.1.5
R00308	1,3-beta-D-Glucan glucanohydrolase	1,3-beta-D-Glucan glucanohydrolase	1,3-beta-D-Glucan + H2O <=> D-Glucose + 1,3-beta-D-Glucan	C00965 + C00001 <=> C00031 + C00965	KEGG	3.2.1.39	3.2.1.39
R00310	protoheme ferro-lyase (protoporphyrin-forming)	protoheme ferro-lyase (protoporphyrin-forming)	Protoporphyrin + Fe2+ <=> Heme + 2 H+	C02191 + C14818 <=> C00032 + 2 C00080	KEGG	4.99.1.1	4.99.1.1
R00311	Heme, hydrogen-donor:oxygen oxidoreductase (alpha-methylene-oxydizing, hydroxylating)	Heme, hydrogen-donor:oxygen oxidoreductase (alpha-methylene-oxydizing, hydroxylating)	Heme + 3 Reduced acceptor + 3 Oxygen <=> Biliverdin + CO + Fe2+ + 3 Acceptor + 3 H2O	C00032 + 3 C00030 + 3 C00007 <=> C00500 + C00237 + C14818 + 3 C00028 + 3 C00001	KEGG	1.14.99.3	1.14.99.3
R00312	NO NAME	NO NAME	Heme <=> Cytochrome a	C00032 <=> C05783	KEGG
R00313	NO NAME	NO NAME	Heme <=> Catalase	C00032 <=> C05784	KEGG
R00314	NO NAME	NO NAME	Heme <=> Peroxidase	C00032 <=> C05785	KEGG
R00315	ATP:acetate phosphotransferase	ATP:acetate phosphotransferase	ATP + Acetate <=> ADP + Acetyl phosphate	C00002 + C00033 <=> C00008 + C00227	KEGG	2.7.2.1，2.7.2.15	2.7.2.1
R00316	ATP:acetate adenylyltransferase	ATP:acetate adenylyltransferase	ATP + Acetate <=> Diphosphate + Acetyl adenylate	C00002 + C00033 <=> C00013 + C05993	KEGG	6.2.1.1	6.2.1.1
R00317	Acetyl phosphate phosphohydrolase	Acetyl phosphate phosphohydrolase	Acetyl phosphate + H2O <=> Acetate + Orthophosphate	C00227 + C00001 <=> C00033 + C00009	KEGG	3.6.1.7	3.6.1.7
R00318	Phosphonoacetate phosphonohydrolase	Phosphonoacetate phosphonohydrolase	Phosphonoacetate + H2O <=> Acetate + Orthophosphate	C05682 + C00001 <=> C00033 + C00009	KEGG	3.11.1.2	3.11.1.2
R00319	(S)-lactate:oxygen 2-oxidoreductase (decarboxylating)	(S)-lactate:oxygen 2-oxidoreductase (decarboxylating)	(S)-Lactate + Oxygen <=> Acetate + CO2 + H2O	C00186 + C00007 <=> C00033 + C00011 + C00001	KEGG	1.13.12.4	1.13.12.4
R00320	diphosphate:acetate phosphotransferase	diphosphate:acetate phosphotransferase	Diphosphate + Acetate <=> Orthophosphate + Acetyl phosphate	C00013 + C00033 <=> C00009 + C00227	KEGG	2.7.2.12	2.7.2.12
R00321	Acetamide amidohydrolase	Acetamide amidohydrolase	Acetamide + H2O <=> Acetate + NH3	C06244 + C00001 <=> C00033 + C00014	KEGG	3.5.1.4	3.5.1.4
R00322	5'-acetylphosphoadenosine acetylhydrolase	5'-acetylphosphoadenosine acetylhydrolase	Acetyl adenylate + H2O <=> AMP + Acetate	C05993 + C00001 <=> C00020 + C00033	KEGG	3.6.1.20	3.6.1.20
R00324	2,4-dioxopentanoate acetylhydrolase; Acetylpyruvate acetylhydrolase	2,4-dioxopentanoate acetylhydrolase	Acetylpyruvate + H2O <=> Acetate + Pyruvate	C02132 + C00001 <=> C00033 + C00022	KEGG	3.7.1.6	3.7.1.6
R00325	(2S)-2-hydroxy-2-methylbutanedioate pyruvate-lyase (acetate-forming); (3S)-citramalate pyruvate-lyase	(3S)-citramalate pyruvate-lyase	(S)-2-Methylmalate <=> Acetate + Pyruvate	C02614 <=> C00033 + C00022	KEGG	4.1.3.22	4.1.3.22
R00326	acetaldehyde:acceptor oxidoreductase	acetaldehyde:acceptor oxidoreductase	Acetaldehyde + Acceptor + H2O <=> Acetate + Reduced acceptor	C00084 + C00028 + C00001 <=> C00033 + C00030	KEGG	1.2.99.6	1.2.99.6
R00327	6-Acetyl-D-glucose acetylhydrolase	6-Acetyl-D-glucose acetylhydrolase	6-Acetyl-D-glucose + H2O <=> D-Glucose + Acetate	C02655 + C00001 <=> C00031 + C00033	KEGG	3.1.1.33	3.1.1.33
R00328	GDP phosphohydrolase	GDP phosphohydrolase	GDP + H2O <=> GMP + Orthophosphate	C00035 + C00001 <=> C00144 + C00009	KEGG	3.6.1.5，3.6.1.6，3.6.1.42	3.6.1.5
R00329	Nucleoside-diphosphate phosphohydrolase	Nucleoside-diphosphate phosphohydrolase	NDP + H2O <=> Nucleotide + Orthophosphate	C00454 + C00001 <=> C00215 + C00009	KEGG	3.6.1.6	3.6.1.6
R00330	ATP:GDP phosphotransferase	ATP:GDP phosphotransferase	ATP + GDP <=> ADP + GTP	C00002 + C00035 <=> C00008 + C00044	KEGG	2.7.4.6	2.7.4.6
R00331	ATP:nucleoside-diphosphate phosphotransferase	ATP:nucleoside-diphosphate phosphotransferase	ATP + NDP <=> ADP + Nucleoside triphosphate	C00002 + C00454 <=> C00008 + C00201	KEGG	2.7.4.6	2.7.4.6
R00332	ATP:GMP phosphotransferase	ATP:GMP phosphotransferase	ATP + GMP <=> ADP + GDP	C00002 + C00144 <=> C00008 + C00035	KEGG	2.7.4.8	2.7.4.8
R00333	nucleoside-triphosphate:AMP phosphotransferase	nucleoside-triphosphate:AMP phosphotransferase	Nucleoside triphosphate + AMP <=> NDP + ADP	C00201 + C00020 <=> C00454 + C00008	KEGG	2.7.4.10	2.7.4.10
R00334	ATP:nucleoside-phosphate phosphotransferase	ATP:nucleoside-phosphate phosphotransferase	ATP + Nucleoside phosphate <=> ADP + NDP	C00002 + C01329 <=> C00008 + C00454	KEGG	2.7.4.4	2.7.4.4
R00335	GTP phosphohydrolase	GTP phosphohydrolase	GTP + H2O <=> GDP + Orthophosphate	C00044 + C00001 <=> C00035 + C00009	KEGG	3.6.1.5，3.6.5.1，3.6.5.2，3.6.5.3，3.6.5.4，3.6.5.5，3.6.5.6	3.6.1.5
R00336	guanosine-3',5'-bis(diphosphate) 3'-diphosphohydrolase	guanosine-3',5'-bis(diphosphate) 3'-diphosphohydrolase	Guanosine 3',5'-bis(diphosphate) + H2O <=> GDP + Diphosphate	C01228 + C00001 <=> C00035 + C00013	KEGG	3.1.7.2	3.1.7.2
R00337	GDP-glucose glucohydrolase	GDP-glucose glucohydrolase	GDP-glucose + H2O <=> GDP + D-Glucose	C00394 + C00001 <=> C00035 + C00031	KEGG	3.2.1.42	3.2.1.42
R00338	Oxaloacetate acetylhydrolase	Oxaloacetate acetylhydrolase	Oxaloacetate + H2O <=> Oxalate + Acetate	C00036 + C00001 <=> C00209 + C00033	KEGG	3.7.1.1	3.7.1.1
R00339	(R,R)-tartrate hydro-lyase (oxaloacetate-forming)	(R,R)-tartrate hydro-lyase (oxaloacetate-forming)	(R,R)-Tartaric acid <=> Oxaloacetate + H2O	C00898 <=> C00036 + C00001	KEGG	4.2.1.32	4.2.1.32
R00340	(S,S)-tartrate hydro-lyase (oxaloacetate-forming)	(S,S)-tartrate hydro-lyase (oxaloacetate-forming)	(S,S)-Tartaric acid <=> Oxaloacetate + H2O	C02107 <=> C00036 + C00001	KEGG	4.2.1.81	4.2.1.81
R00341	ATP:oxaloacetate carboxy-lyase (transphosphorylating;phosphoenolpyruvate-forming)	ATP:oxaloacetate carboxy-lyase (transphosphorylating;phosphoenolpyruvate-forming)	ATP + Oxaloacetate <=> ADP + Phosphoenolpyruvate + CO2	C00002 + C00036 <=> C00008 + C00074 + C00011	KEGG	4.1.1.49	4.1.1.49
R00342	(S)-malate:NAD+ oxidoreductase	(S)-malate:NAD+ oxidoreductase	(S)-Malate + NAD+ <=> Oxaloacetate + NADH + H+	C00149 + C00003 <=> C00036 + C00004 + C00080	KEGG	1.1.1.37	1.1.1.37
R00343	(S)-Malate:NADP+ oxidoreductase	(S)-Malate:NADP+ oxidoreductase	(S)-Malate + NADP+ <=> Oxaloacetate + NADPH + H+	C00149 + C00006 <=> C00036 + C00005 + C00080	KEGG	1.1.1.82	1.1.1.82
R00344	Pyruvate:carbon-dioxide ligase (ADP-forming)	Pyruvate:carbon-dioxide ligase (ADP-forming)	ATP + Pyruvate + HCO3- <=> ADP + Orthophosphate + Oxaloacetate	C00002 + C00022 + C00288 <=> C00008 + C00009 + C00036	KEGG	6.4.1.1	6.4.1.1
R00345	phosphate:oxaloacetate carboxy-lyase (adding phosphate;phosphoenolpyruvate-forming); Orthophosphate:oxaloacetate carboxyl-lyase (phosphorylating)	Orthophosphate:oxaloacetate carboxyl-lyase (phosphorylating)	Orthophosphate + Oxaloacetate <=> H2O + Phosphoenolpyruvate + CO2	C00009 + C00036 <=> C00001 + C00074 + C00011	KEGG	4.1.1.31	4.1.1.31
R00346	diphosphate:oxaloacetate carboxy-lyase (transphosphorylating;phosphoenolpyruvate-forming); Pyrophosphate:oxaloacetate carboxy-lyase (transphosphorylating)	Pyrophosphate:oxaloacetate carboxy-lyase (transphosphorylating)	Diphosphate + Oxaloacetate <=> Orthophosphate + Phosphoenolpyruvate + CO2	C00013 + C00036 <=> C00009 + C00074 + C00011	KEGG	4.1.1.38	4.1.1.38
R00347	erythro-3-hydroxy-Ls-aspartate ammonia-lyase (oxaloacetate-forming)	erythro-3-hydroxy-Ls-aspartate ammonia-lyase (oxaloacetate-forming)	erythro-3-Hydroxy-Ls-aspartate <=> Oxaloacetate + NH3	C03961 <=> C00036 + C00014	KEGG	4.3.1.20	4.3.1.20
R00348	2-oxosuccinamate amidohydrolase	2-oxosuccinamate amidohydrolase	2-Oxosuccinamate + H2O <=> Oxaloacetate + NH3	C02362 + C00001 <=> C00036 + C00014	KEGG	3.5.1.3	3.5.1.3
R00350	4-carboxy-4-hydroxy-2-oxoadipate oxaloacetate-lyase (pyruvate-forming)	4-carboxy-4-hydroxy-2-oxoadipate oxaloacetate-lyase (pyruvate-forming)	4-Carboxy-4-hydroxy-2-oxoadipate <=> Oxaloacetate + Pyruvate	C04115 <=> C00036 + C00022	KEGG	4.1.3.17	4.1.3.17
R00351	acetyl-CoA:oxaloacetate C-acetyltransferase (thioester-hydrolysing)	acetyl-CoA:oxaloacetate C-acetyltransferase (thioester-hydrolysing)	Citrate + CoA <=> Acetyl-CoA + H2O + Oxaloacetate	C00158 + C00010 <=> C00024 + C00001 + C00036	KEGG	2.3.3.1，2.3.3.3	2.3.3.1
R00352	acetyl-CoA:oxaloacetate C-acetyltransferase [(pro-S)-carboxymethyl-forming, ADP-phosphorylating]	acetyl-CoA:oxaloacetate C-acetyltransferase [(pro-S)-carboxymethyl-forming, ADP-phosphorylating]	ATP + Citrate + CoA <=> ADP + Orthophosphate + Acetyl-CoA + Oxaloacetate	C00002 + C00158 + C00010 <=> C00008 + C00009 + C00024 + C00036	KEGG	2.3.3.8	2.3.3.8
R00353	Malonyl-CoA:pyruvate carboxytransferase	Malonyl-CoA:pyruvate carboxytransferase	Malonyl-CoA + Pyruvate <=> Acetyl-CoA + Oxaloacetate	C00083 + C00022 <=> C00024 + C00036	KEGG	2.1.3.1	2.1.3.1
R00354	(3S)-citryl-CoA oxaloacetate-lyase (acetyl-CoA-forming)	(3S)-citryl-CoA oxaloacetate-lyase (acetyl-CoA-forming)	(3S)-Citryl-CoA <=> Acetyl-CoA + Oxaloacetate	C00566 <=> C00024 + C00036	KEGG	4.1.3.34	4.1.3.34
R00355	L-Aspartate:2-oxoglutarate aminotransferase	L-Aspartate:2-oxoglutarate aminotransferase	L-Aspartate + 2-Oxoglutarate <=> Oxaloacetate + L-Glutamate	C00049 + C00026 <=> C00036 + C00025	KEGG	2.6.1.1	2.6.1.1
R00357	L-Aspartic acid:oxygen oxidoreductase (deaminating)	L-Aspartic acid:oxygen oxidoreductase (deaminating)	L-Aspartate + H2O + Oxygen <=> Oxaloacetate + NH3 + Hydrogen peroxide	C00049 + C00001 + C00007 <=> C00036 + C00014 + C00027	KEGG	1.4.3.2，1.4.3.16	1.4.3.2
R00359	D-Aspartate:oxygen oxidoreductase (deaminating)	D-Aspartate:oxygen oxidoreductase (deaminating)	D-Aspartate + H2O + Oxygen <=> Oxaloacetate + NH3 + Hydrogen peroxide	C00402 + C00001 + C00007 <=> C00036 + C00014 + C00027	KEGG	1.4.3.1，1.4.3.15	1.4.3.1
R00360	(S)-Malate:oxygen oxidoreductase	(S)-Malate:oxygen oxidoreductase	(S)-Malate + Oxygen <=> Oxaloacetate + Hydrogen peroxide	C00149 + C00007 <=> C00036 + C00027	KEGG	1.1.3.3	1.1.3.3
R00361	(S)-malate:acceptor oxidoreductase	(S)-malate:acceptor oxidoreductase	(S)-Malate + Acceptor <=> Oxaloacetate + Reduced acceptor	C00149 + C00028 <=> C00036 + C00030	KEGG	1.1.5.4	1.1.5.4
R00362	citrate oxaloacetate-lyase (forming acetate from the pro-S carboxymethyl group of citrate); Citrate oxaloacetate-lyase ((pro-3S)-CH2COO- -->acetate)	Citrate oxaloacetate-lyase ((pro-3S)-CH2COO- -->acetate)	Citrate <=> Acetate + Oxaloacetate	C00158 <=> C00033 + C00036	KEGG	4.1.3.6	4.1.3.6
R00363	Oxaloacetate keto-enol-isomerase	Oxaloacetate keto-enol-isomerase	Oxaloacetate <=> 2-Hydroxyethylenedicarboxylate	C00036 <=> C03981	KEGG	5.3.2.2	5.3.2.2
R00364	Glycine:ferricytochrome-c oxidoreductase (deaminating)	Glycine:ferricytochrome-c oxidoreductase (deaminating)	Glycine + H2O + 2 Ferricytochrome c <=> Glyoxylate + NH3 + 2 Ferrocytochrome c + 2 H+	C00037 + C00001 + 2 C00125 <=> C00048 + C00014 + 2 C00126 + 2 C00080	KEGG	1.4.2.1	1.4.2.1
R00365	glycine:NAD+ oxidoreductase (deaminating)	glycine:NAD+ oxidoreductase (deaminating)	Glycine + H2O + NAD+ <=> Glyoxylate + NH3 + NADH + H+	C00037 + C00001 + C00003 <=> C00048 + C00014 + C00004 + C00080	KEGG	1.4.1.1，1.4.1.10	1.4.1.1
R00366	glycine:oxygen oxidoreductase (deaminating); Aminoacetic acid:oxygen oxidoreductase (deaminating)	glycine:oxygen oxidoreductase (deaminating)	Glycine + H2O + Oxygen <=> Glyoxylate + NH3 + Hydrogen peroxide	C00037 + C00001 + C00007 <=> C00048 + C00014 + C00027	KEGG	1.4.3.3，1.4.3.19	1.4.3.3
R00367	S-Adenosyl-L-methionine:glycine N-methyltransferase	S-Adenosyl-L-methionine:glycine N-methyltransferase	S-Adenosyl-L-methionine + Glycine <=> S-Adenosyl-L-homocysteine + Sarcosine	C00019 + C00037 <=> C00021 + C00213	KEGG	2.1.1.20，2.1.1.156，2.1.1.162	2.1.1.20
R00368	N-(carboxymethyl)-D-alanine:NAD+ oxidoreductase (glycine-forming)	N-(carboxymethyl)-D-alanine:NAD+ oxidoreductase (glycine-forming)	N-(Carboxymethyl)-D-alanine + NAD+ + H2O <=> Glycine + Pyruvate + NADH + H+	C03790 + C00003 + C00001 <=> C00037 + C00022 + C00004 + C00080	KEGG	1.5.1.22	1.5.1.22
R00369	L-Alanine:glyoxylate aminotransferase	L-Alanine:glyoxylate aminotransferase	L-Alanine + Glyoxylate <=> Pyruvate + Glycine	C00041 + C00048 <=> C00022 + C00037	KEGG	2.6.1.44	2.6.1.44
R00371	Acetyl-CoA:glycine C-acetyltransferase	Acetyl-CoA:glycine C-acetyltransferase	Acetyl-CoA + Glycine <=> CoA + L-2-Amino-3-oxobutanoic acid	C00024 + C00037 <=> C00010 + C03508	KEGG	2.3.1.29	2.3.1.29
R00372	Glycine:2-oxoglutarate aminotransferase	Glycine:2-oxoglutarate aminotransferase	Glycine + 2-Oxoglutarate <=> Glyoxylate + L-Glutamate	C00037 + C00026 <=> C00048 + C00025	KEGG	2.6.1.4，2.6.1.44	2.6.1.4
R00373	Glycine:oxaloacetate aminotransferase	Glycine:oxaloacetate aminotransferase	Glycine + Oxaloacetate <=> Glyoxylate + L-Aspartate	C00037 + C00036 <=> C00048 + C00049	KEGG	2.6.1.35	2.6.1.35
R00374	glycine:acceptor oxidoreductase (cyanide-forming)	glycine:acceptor oxidoreductase (cyanide-forming)	Glycine + 2 Acceptor <=> Cyanide + CO2 + 2 Reduced acceptor + H+	C00037 + 2 C00028 <=> C00177 + C00011 + 2 C00030 + C00080	KEGG	1.4.99.5	1.4.99.5
R00375	Deoxyadenosine 5'-triphosphate:DNA deoxynucleotidyltransferase (DNA-directed)	Deoxyadenosine 5'-triphosphate:DNA deoxynucleotidyltransferase (DNA-directed)	dATP + DNA <=> Diphosphate + DNA	C00131 + C00039 <=> C00013 + C00039	KEGG	2.7.7.7	2.7.7.7
R00376	Deoxyguanosine 5'-triphosphate:DNA deoxynucleotidyltransferase (DNA-directed)	Deoxyguanosine 5'-triphosphate:DNA deoxynucleotidyltransferase (DNA-directed)	dGTP + DNA <=> Diphosphate + DNA	C00286 + C00039 <=> C00013 + C00039	KEGG	2.7.7.7	2.7.7.7
R00377	Deoxycytidine triphosphate:DNA deoxynucleotidyltransferase (DNA-directed)	Deoxycytidine triphosphate:DNA deoxynucleotidyltransferase (DNA-directed)	dCTP + DNA <=> Diphosphate + DNA	C00458 + C00039 <=> C00013 + C00039	KEGG	2.7.7.7	2.7.7.7
R00378	deoxythymidine triphosphate:DNA deoxynucleotidyltransferase (DNA-directed)	deoxythymidine triphosphate:DNA deoxynucleotidyltransferase (DNA-directed)	dTTP + DNA <=> Diphosphate + DNA	C00459 + C00039 <=> C00013 + C00039	KEGG	2.7.7.7	2.7.7.7
R00379	Deoxynucleoside triphosphate:DNA deoxynucleotidyltransferase	Deoxynucleoside triphosphate:DNA deoxynucleotidyltransferase	Deoxynucleoside triphosphate + DNA(n) <=> Diphosphate + DNA(n+1)	C00677 + C00039(n) <=> C00013 + C00039(n+1)	KEGG	2.7.7.7，2.7.7.31，2.7.7.49	2.7.7.7
R00380	S-Adenosyl-L-methionine:DNA (cytosine-5-)-methyltransferase	S-Adenosyl-L-methionine:DNA (cytosine-5-)-methyltransferase	S-Adenosyl-L-methionine + DNA <=> S-Adenosyl-L-homocysteine + DNA 5-methylcytosine	C00019 + C00039 <=> C00021 + C02967	KEGG	2.1.1.37	2.1.1.37
R00381	(Deoxyribonucleotide)n:5'-phospho-(deoxyribonucleotide)m ligase (AMP-forming)	(Deoxyribonucleotide)n:5'-phospho-(deoxyribonucleotide)m ligase (AMP-forming)	ATP + DNA(n) + 5'-Phospho-DNA(m) <=> AMP + Diphosphate + DNA(n+m)	C00002 + C00039(n) + C02128(m) <=> C00020 + C00013 + C00039(n+m)	KEGG	6.5.1.1	6.5.1.1
R00382	(Deoxyribonucleotide)n:5'-phospho-(deoxyribonucleotide)m ligase (AMP-forming, NMN-forming)	(Deoxyribonucleotide)n:5'-phospho-(deoxyribonucleotide)m ligase (AMP-forming, NMN-forming)	NAD+ + DNA(n) + 5'-Phospho-DNA(m) <=> AMP + Nicotinamide D-ribonucleotide + DNA(n+m)	C00003 + C00039(n) + C02128(m) <=> C00020 + C00455 + C00039(n+m)	KEGG	6.5.1.2	6.5.1.2
R00383	Acyl-CoA hydrolase	Acyl-CoA hydrolase	Acyl-CoA + H2O <=> CoA + Carboxylate	C00040 + C00001 <=> C00010 + C00060	KEGG	3.1.2.18，3.1.2.19，3.1.2.20	3.1.2.18
R00384	acyl-CoA:NAD+ trans-2-oxidoreductase	acyl-CoA:NAD+ trans-2-oxidoreductase	Acyl-CoA + NAD+ <=> trans-2,3-Dehydroacyl-CoA + NADH + H+	C00040 + C00003 <=> C00658 + C00004 + C00080	KEGG	1.3.1.44	1.3.1.44
R00385	acyl-CoA:NADP+ 2-oxidoreductase	acyl-CoA:NADP+ 2-oxidoreductase	Acyl-CoA + NADP+ <=> 2,3-Dehydroacyl-CoA + NADPH + H+	C00040 + C00006 <=> C00605 + C00005 + C00080	KEGG	1.3.1.8	1.3.1.8
R00387	acyl-CoA:NADP+ cis-2-oxidoreductase	acyl-CoA:NADP+ cis-2-oxidoreductase	Acyl-CoA + NADP+ <=> cis-2,3-Dehydroacyl-CoA + NADPH + H+	C00040 + C00006 <=> C01122 + C00005 + C00080	KEGG	1.3.1.37	1.3.1.37
R00388	Acyl-CoA:oxygen 2-oxidoreductase	Acyl-CoA:oxygen 2-oxidoreductase	Acyl-CoA + Oxygen <=> trans-2,3-Dehydroacyl-CoA + Hydrogen peroxide	C00040 + C00007 <=> C00658 + C00027	KEGG	1.3.3.6	1.3.3.6
R00389	Acid:CoA ligase (AMP-forming)	Acid:CoA ligase (AMP-forming)	ATP + Acid + CoA <=> AMP + Diphosphate + Acyl-CoA	C00002 + C00174 + C00010 <=> C00020 + C00013 + C00040	KEGG	6.2.1.2	6.2.1.2
R00390	Long-chain carboxylate:CoA ligase (AMP-forming)	Long-chain carboxylate:CoA ligase (AMP-forming)	ATP + Long-chain carboxylate + CoA <=> AMP + Diphosphate + Acyl-CoA	C00002 + C00347 + C00010 <=> C00020 + C00013 + C00040	KEGG	6.2.1.3	6.2.1.3
R00391	Acyl-CoA:acetyl-CoA C-acyltransferase	Acyl-CoA:acetyl-CoA C-acyltransferase	Acyl-CoA + Acetyl-CoA <=> CoA + 3-Oxoacyl-CoA	C00040 + C00024 <=> C00010 + C00264	KEGG	2.3.1.16	2.3.1.16
R00392	Acyl-CoA:acceptor 2,3-oxidoreductase	Acyl-CoA:acceptor 2,3-oxidoreductase	Acyl-CoA + Acceptor <=> 2,3-Dehydroacyl-CoA + Reduced acceptor	C00040 + C00028 <=> C00605 + C00030	KEGG	1.3.99.3，1.3.99.13	1.3.99.3
R00393	Acyl-CoA:acetate CoA-transferase	Acyl-CoA:acetate CoA-transferase	Acyl-CoA + Acetate <=> Fatty acid anion + Acetyl-CoA	C00040 + C00033 <=> C02403 + C00024	KEGG	2.8.3.8	2.8.3.8
R00394	Acid:CoA ligase (GDP-forming)	Acid:CoA ligase (GDP-forming)	GTP + Acid + CoA <=> GDP + Orthophosphate + Acyl-CoA	C00044 + C00174 + C00010 <=> C00035 + C00009 + C00040	KEGG	6.2.1.10	6.2.1.10
R00395	Acyl-CoA:glycine N-acyltransferase	Acyl-CoA:glycine N-acyltransferase	Acyl-CoA + Glycine <=> CoA + N-Acylglycine	C00040 + C00037 <=> C00010 + C02055	KEGG	2.3.1.13	2.3.1.13
R00396	L-Alanine:NAD+ oxidoreductase (deaminating)	L-Alanine:NAD+ oxidoreductase (deaminating)	L-Alanine + NAD+ + H2O <=> Pyruvate + NH3 + NADH + H+	C00041 + C00003 + C00001 <=> C00022 + C00014 + C00004 + C00080	KEGG	1.4.1.1	1.4.1.1
R00397	L-aspartate 4-carboxy-lyase (L-alanine-forming)	L-aspartate 4-carboxy-lyase (L-alanine-forming)	L-Aspartate <=> L-Alanine + CO2	C00049 <=> C00041 + C00011	KEGG	4.1.1.12	4.1.1.12
R00398	2,2'-iminodipropanoate:NAD+ oxidoreductase (L-alanine-forming)	2,2'-iminodipropanoate:NAD+ oxidoreductase (L-alanine-forming)	Alanopine + NAD+ + H2O <=> L-Alanine + Pyruvate + NADH + H+	C03210 + C00003 + C00001 <=> C00041 + C00022 + C00004 + C00080	KEGG	1.5.1.17	1.5.1.17
R00399	2-amino-4-ketopentanoate thiolase; acetyl-CoA:D-alanine C-acyltransferase	2-amino-4-ketopentanoate thiolase	D-Alanine + Acetyl-CoA <=> 2-Amino-4-oxopentanoic acid + CoA	C00133 + C00024 <=> C03341 + C00010	KEGG	2.3.1.-	2.3.1.-
R00400	L-alanine:oxaloacetate aminotransferase	L-alanine:oxaloacetate aminotransferase	L-Alanine + Oxaloacetate <=> Pyruvate + L-Aspartate	C00041 + C00036 <=> C00022 + C00049	KEGG	2.6.1.12	2.6.1.12
R00401	alanine racemase	alanine racemase	L-Alanine <=> D-Alanine	C00041 <=> C00133	KEGG	5.1.1.1	5.1.1.1
R00402	succinate:NAD+ oxidoreductase	succinate:NAD+ oxidoreductase	Succinate + NAD+ <=> Fumarate + NADH + H+	C00042 + C00003 <=> C00122 + C00004 + C00080	KEGG	1.3.1.6	1.3.1.6
R00405	Succinate:CoA ligase (ADP-forming)	Succinate:CoA ligase (ADP-forming)	ATP + Succinate + CoA <=> ADP + Orthophosphate + Succinyl-CoA	C00002 + C00042 + C00010 <=> C00008 + C00009 + C00091	KEGG	6.2.1.5	6.2.1.5
R00406	succinyl-CoA:malate CoA-transferase	succinyl-CoA:malate CoA-transferase	Succinyl-CoA + (S)-Malate <=> Succinate + (3S)-3-Carboxy-3-hydroxypropanoyl-CoA	C00091 + C00149 <=> C00042 + C04348	KEGG	2.8.3.-	2.8.3.-
R00407	Succinyl-CoA hydrolase	Succinyl-CoA hydrolase	Succinyl-CoA + H2O <=> CoA + Succinate	C00091 + C00001 <=> C00010 + C00042	KEGG	3.1.2.3	3.1.2.3
R00408	Succinate:(acceptor) oxidoreductase	Succinate:(acceptor) oxidoreductase	Succinate + FAD <=> FADH2 + Fumarate	C00042 + C00016 <=> C01352 + C00122	KEGG	1.3.99.1	1.3.99.1
R00409	(2S,3R)-3-hydroxybutane-1,2,3-tricarboxylate pyruvate-lyase (succinate-forming)	(2S,3R)-3-hydroxybutane-1,2,3-tricarboxylate pyruvate-lyase (succinate-forming)	(2S,3R)-3-Hydroxybutane-1,2,3-tricarboxylate <=> Pyruvate + Succinate	C04593 <=> C00022 + C00042	KEGG	4.1.3.30	4.1.3.30
R00410	succinyl-CoA:acetoacetate CoA-transferase	succinyl-CoA:acetoacetate CoA-transferase	Succinyl-CoA + Acetoacetate <=> Succinate + Acetoacetyl-CoA	C00091 + C00164 <=> C00042 + C00332	KEGG	2.8.3.5	2.8.3.5
R00411	N-succinyl-L-glutamate amidohydrolase	N-succinyl-L-glutamate amidohydrolase	N-Succinyl-L-glutamate + H2O <=> L-Glutamate + Succinate	C05931 + C00001 <=> C00025 + C00042	KEGG	3.5.1.96	3.5.1.96
R00412	succinate:acceptor oxidoreductase	succinate:acceptor oxidoreductase	Succinate + Acceptor <=> Fumarate + Reduced acceptor	C00042 + C00028 <=> C00122 + C00030	KEGG	1.3.99.1	1.3.99.1
R00414	UDP-N-acetyl-D-glucosamine 2-epimerase	UDP-N-acetyl-D-glucosamine 2-epimerase	UDP-N-acetyl-D-glucosamine + H2O <=> N-Acetyl-D-mannosamine + UDP	C00043 + C00001 <=> C00645 + C00015	KEGG	5.1.3.14	5.1.3.14
R00416	UTP:N-acetyl-alpha-D-glucosamine-1-phosphate uridylyltransferase	UTP:N-acetyl-alpha-D-glucosamine-1-phosphate uridylyltransferase	UTP + N-Acetyl-alpha-D-glucosamine 1-phosphate <=> Diphosphate + UDP-N-acetyl-D-glucosamine	C00075 + C04501 <=> C00013 + C00043	KEGG	2.7.7.23	2.7.7.23
R00417	UDP-N-acetyl-D-glucosamine:protein beta-N-acetyl-D-glucosaminyltransferase	UDP-N-acetyl-D-glucosamine:protein beta-N-acetyl-D-glucosaminyltransferase	UDP-N-acetyl-D-glucosamine + Protein asparagine <=> UDP + 4-N-(N-Acetyl-D-glucosaminyl)-protein	C00043 + C03021 <=> C00015 + C04375	KEGG	2.4.1.94	2.4.1.94
R00418	UDP-N-acetyl-D-glucosamine 4-epimerase	UDP-N-acetyl-D-glucosamine 4-epimerase	UDP-N-acetyl-D-glucosamine <=> UDP-N-acetyl-D-galactosamine	C00043 <=> C00203	KEGG	5.1.3.2，5.1.3.7	5.1.3.2
R00420	UDP-N-acetyl-D-glucosamine 2-epimerase	UDP-N-acetyl-D-glucosamine 2-epimerase	UDP-N-acetyl-D-glucosamine <=> UDP-N-acetyl-D-mannosamine	C00043 <=> C01170	KEGG	5.1.3.14	5.1.3.14
R00421	UDP-N-acetyl-D-glucosamine:NAD+ 6-oxidoreductase	UDP-N-acetyl-D-glucosamine:NAD+ 6-oxidoreductase	UDP-N-acetyl-D-glucosamine + 2 NAD+ + H2O <=> UDP-N-acetyl-2-amino-2-deoxy-D-glucuronate + 2 NADH + 2 H+	C00043 + 2 C00003 + C00001 <=> C04573 + 2 C00004 + 2 C00080	KEGG	1.1.1.136	1.1.1.136
R00422	NO NAME	NO NAME	UDP-N-acetyl-D-glucosamine <=> Glycolipid	C00043 <=> C05005	KEGG
R00423	NO NAME	NO NAME	UDP-N-acetyl-D-glucosamine <=> Mucopolysaccharide	C00043 <=> C05114	KEGG
R00424	GTP 7,8-8,9-dihydrolase	GTP 7,8-8,9-dihydrolase	GTP + H2O <=> 2-Amino-4-hydroxy-6-(erythro-1,2,3-trihydroxypropyl)dihydropteridine triphosphate + Formate	C00044 + C00001 <=> C04895 + C00058	KEGG	3.5.4.16	3.5.4.16
R00425	GTP 7,8-8,9-dihydrolase (diphosphate-forming)	GTP 7,8-8,9-dihydrolase (diphosphate-forming)	GTP + 3 H2O <=> Formate + 2,5-Diamino-6-(5-phospho-D-ribosylamino)pyrimidin-4(3H)-one + Diphosphate	C00044 + 3 C00001 <=> C00058 + C01304 + C00013	KEGG	3.5.4.25	3.5.4.25
R00426	GTP diphosphohydrolase (diphosphate-forming); Guanosine 5'-triphosphate pyrophosphohydrolase	GTP diphosphohydrolase (diphosphate-forming)	GTP + H2O <=> GMP + Diphosphate	C00044 + C00001 <=> C00144 + C00013	KEGG	3.6.1.8，3.6.1.19	3.6.1.8
R00428	GTP 8,9-hydrolase	GTP 8,9-hydrolase	GTP + H2O <=> Formamidopyrimidine nucleoside triphosphate	C00044 + C00001 <=> C05922	KEGG	3.5.4.16	3.5.4.16
R00429	ATP:GTP 3'-diphosphotransferase	ATP:GTP 3'-diphosphotransferase	ATP + GTP <=> AMP + Guanosine 3'-diphosphate 5'-triphosphate	C00002 + C00044 <=> C00020 + C04494	KEGG	2.7.6.5	2.7.6.5
R00430	GTP:pyruvate 2-O-phosphotransferase	GTP:pyruvate 2-O-phosphotransferase	GTP + Pyruvate <=> GDP + Phosphoenolpyruvate	C00044 + C00022 <=> C00035 + C00074	KEGG	2.7.1.40	2.7.1.40
R00431	GTP:oxaloacetate carboxy-lyase (adding GTP;phosphoenolpyruvate-forming); GTP:oxaloacetate carboxy-lyase (transphosphorylating)	GTP:oxaloacetate carboxy-lyase (transphosphorylating)	GTP + Oxaloacetate <=> GDP + Phosphoenolpyruvate + CO2	C00044 + C00036 <=> C00035 + C00074 + C00011	KEGG	4.1.1.32	4.1.1.32
R00432	Succinate:CoA ligase (GDP-forming)	Succinate:CoA ligase (GDP-forming)	GTP + Succinate + CoA <=> GDP + Orthophosphate + Succinyl-CoA	C00044 + C00042 + C00010 <=> C00035 + C00009 + C00091	KEGG	6.2.1.4	6.2.1.4
R00434	GTP diphosphate-lyase (cyclizing; 3',5'-cyclic-GMP-forming)	GTP diphosphate-lyase (cyclizing; 3',5'-cyclic-GMP-forming)	GTP <=> 3',5'-Cyclic GMP + Diphosphate	C00044 <=> C00942 + C00013	KEGG	4.6.1.1，4.6.1.2	4.6.1.1
R00435	ATP:polynucleotide adenylyltransferase; ATP:RNA adenylyltransferase	ATP:RNA adenylyltransferase	ATP + RNA <=> Diphosphate + RNA	C00002 + C00046 <=> C00013 + C00046	KEGG	2.7.7.6，2.7.7.19，2.7.7.48	2.7.7.6
R00436	polyribonucleotide ligase (cyclizing, AMP-forming)	polyribonucleotide ligase (cyclizing, AMP-forming)	ATP + RNA <=> AMP + Diphosphate + RNA(circular)	C00002 + C00046 <=> C00020 + C00013 + C02073	KEGG	6.5.1.3	6.5.1.3
R00437	polyribonucleotide:phosphate adenylyltransferase	polyribonucleotide:phosphate adenylyltransferase	RNA + Orthophosphate <=> RNA + ADP	C00046 + C00009 <=> C00046 + C00008	KEGG	2.7.7.8	2.7.7.8
R00438	polyribonucleotide:phosphate uridylyltransferase	polyribonucleotide:phosphate uridylyltransferase	RNA + Orthophosphate <=> RNA + UDP	C00046 + C00009 <=> C00046 + C00015	KEGG	2.7.7.8	2.7.7.8
R00439	polyribonucleotide:phosphate guanylyltransferase	polyribonucleotide:phosphate guanylyltransferase	RNA + Orthophosphate <=> RNA + GDP	C00046 + C00009 <=> C00046 + C00035	KEGG	2.7.7.8	2.7.7.8
R00440	polyribonucleotide:phosphate cytidylyltransferase	polyribonucleotide:phosphate cytidylyltransferase	RNA + Orthophosphate <=> RNA + CDP	C00046 + C00009 <=> C00046 + C00112	KEGG	2.7.7.8	2.7.7.8
R00441	GTP:RNA guanylyltransferase (DNA-directed); GTP:RNA guanylyltransferase (RNA-directed)	GTP:RNA guanylyltransferase (DNA-directed)	GTP + RNA <=> Diphosphate + RNA	C00044 + C00046 <=> C00013 + C00046	KEGG	2.7.7.6，2.7.7.48	2.7.7.6
R00442	CTP:RNA cytidylyltransferase (DNA-directed); CTP:RNA cytidylyltransferase (RNA-directed)	CTP:RNA cytidylyltransferase (DNA-directed)	CTP + RNA <=> Diphosphate + RNA	C00063 + C00046 <=> C00013 + C00046	KEGG	2.7.7.6，2.7.7.48	2.7.7.6
R00443	UTP:RNA uridylyltransferase	UTP:RNA uridylyltransferase	UTP + RNA <=> Diphosphate + RNA	C00075 + C00046 <=> C00013 + C00046	KEGG	2.7.7.6，2.7.7.48，2.7.7.52	2.7.7.6
R00444	nucleoside-triphosphate:RNA nucleotidyltransferase (DNA-directed); nucleoside-triphosphate:RNA nucleotidyltransferase (RNA-directed)	nucleoside-triphosphate:RNA nucleotidyltransferase (DNA-directed)	Nucleoside triphosphate + RNA <=> Diphosphate + RNA	C00201 + C00046 <=> C00013 + C00046	KEGG	2.7.7.6，2.7.7.48	2.7.7.6
R00445	L-lysine:NAD+ oxidoreductase (deaminating, cyclizing)	L-lysine:NAD+ oxidoreductase (deaminating, cyclizing)	L-Lysine + NAD+ <=> delta1-Piperideine-2-carboxylate + NH3 + NADH + H+	C00047 + C00003 <=> C04092 + C00014 + C00004 + C00080	KEGG	1.4.1.15	1.4.1.15
R00446	L-Lysine:NAD+ 6-oxidoreductase (deaminating)	L-Lysine:NAD+ 6-oxidoreductase (deaminating)	L-Lysine + NAD+ + H2O <=> L-2-Aminoadipate 6-semialdehyde + NADH + NH3 + H+	C00047 + C00003 + C00001 <=> C04076 + C00004 + C00014 + C00080	KEGG	1.4.1.18	1.4.1.18
R00447	L-lysine:oxygen 2-oxidoreductase (deaminating)	L-lysine:oxygen 2-oxidoreductase (deaminating)	L-Lysine + Oxygen + H2O <=> 6-Amino-2-oxohexanoate + NH3 + Hydrogen peroxide	C00047 + C00007 + C00001 <=> C03239 + C00014 + C00027	KEGG	1.4.3.14	1.4.3.14
R00448	L-lysine,NADPH:oxygen oxidoreductase (6-hydroxylating)	L-lysine,NADPH:oxygen oxidoreductase (6-hydroxylating)	L-Lysine + Oxygen + NADPH + H+ <=> N6-Hydroxy-L-lysine + NADP+ + H2O	C00047 + C00007 + C00005 + C00080 <=> C01028 + C00006 + C00001	KEGG	1.14.13.59	1.14.13.59
R00449	L-Lysine:oxygen 2-oxidoreductase (decarboxylating)	L-Lysine:oxygen 2-oxidoreductase (decarboxylating)	L-Lysine + Oxygen <=> 5-Aminopentanamide + CO2 + H2O	C00047 + C00007 <=> C00990 + C00011 + C00001	KEGG	1.13.12.2	1.13.12.2
R00451	meso-2,6-diaminoheptanedioate carboxy-lyase (L-lysine-forming)	meso-2,6-diaminoheptanedioate carboxy-lyase (L-lysine-forming)	meso-2,6-Diaminoheptanedioate <=> L-Lysine + CO2	C00680 <=> C00047 + C00011	KEGG	4.1.1.20	4.1.1.20
R00452	N2-(D-1-carboxylethyl)-L-lysine:NADP+ oxidoreductase (L-lysine-forming)	N2-(D-1-carboxylethyl)-L-lysine:NADP+ oxidoreductase (L-lysine-forming)	D-Lysopine + NADP+ + H2O <=> L-Lysine + Pyruvate + NADPH + H+	C04020 + C00006 + C00001 <=> C00047 + C00022 + C00005 + C00080	KEGG	1.5.1.16	1.5.1.16
R00453	L-Lysine:pyruvate aminotransferase	L-Lysine:pyruvate aminotransferase	L-Lysine + Pyruvate <=> L-2-Aminoadipate 6-semialdehyde + L-Alanine	C00047 + C00022 <=> C04076 + C00041	KEGG	2.6.1.71	2.6.1.71
R00454	acetyl-CoA:L-lysine N6-acetyltransferase	acetyl-CoA:L-lysine N6-acetyltransferase	L-Lysine + Acetyl-CoA <=> N6-Acetyl-L-lysine + CoA	C00047 + C00024 <=> C02727 + C00010	KEGG	2.3.1.-	2.3.1.-
R00457	L-Lysine:2-oxoglutarate 6-aminotransferase	L-Lysine:2-oxoglutarate 6-aminotransferase	L-Lysine + 2-Oxoglutarate <=> L-2-Aminoadipate 6-semialdehyde + L-Glutamate	C00047 + C00026 <=> C04076 + C00025	KEGG	2.6.1.36	2.6.1.36
R00458	N6-acetyl-L-lysine amidohydrolase	N6-acetyl-L-lysine amidohydrolase	N6-Acetyl-L-lysine + H2O <=> Acetate + L-Lysine	C02727 + C00001 <=> C00033 + C00047	KEGG	3.5.1.17	3.5.1.17
R00459	NO NAME	NO NAME	L-Lysine <=> L-Pipecolate	C00047 <=> C00408	KEGG
R00460	lysine racemase	lysine racemase	L-Lysine <=> D-Lysine	C00047 <=> C00739	KEGG	5.1.1.5，5.1.1.9	5.1.1.5
R00461	L-Lysine 2,3-aminomutase	L-Lysine 2,3-aminomutase	L-Lysine <=> (3S)-3,6-Diaminohexanoate	C00047 <=> C01142	KEGG	5.4.3.2	5.4.3.2
R00462	L-lysine carboxy-lyase (cadaverine-forming)	L-lysine carboxy-lyase (cadaverine-forming)	L-Lysine <=> Cadaverine + CO2	C00047 <=> C01672 + C00011	KEGG	4.1.1.18	4.1.1.18
R00463	L-Lysine-1,6-lactam lactamhydrolase	L-Lysine-1,6-lactam lactamhydrolase	L-Lysine 1,6-lactam + H2O <=> L-Lysine	C02837 + C00001 <=> C00047	KEGG	3.5.2.11	3.5.2.11
R00465	glycolate:NADP+ oxidoreductase	glycolate:NADP+ oxidoreductase	Glycolate + NADP+ <=> Glyoxylate + NADPH + H+	C00160 + C00006 <=> C00048 + C00005 + C00080	KEGG	1.1.1.79	1.1.1.79
R00466	Glyoxylate:oxygen oxidoreductase	Glyoxylate:oxygen oxidoreductase	Glyoxylate + Oxygen + H2O <=> Oxalate + Hydrogen peroxide	C00048 + C00007 + C00001 <=> C00209 + C00027	KEGG	1.2.3.5	1.2.3.5
R00468	Glyoxylate:NADP+ oxidoreductase (CoA-oxalylating)	Glyoxylate:NADP+ oxidoreductase (CoA-oxalylating)	Glyoxylate + CoA + NADP+ <=> Oxalyl-CoA + NADPH + H+	C00048 + C00010 + C00006 <=> C00313 + C00005 + C00080	KEGG	1.2.1.17	1.2.1.17
R00469	(S)-ureidoglycolate amidohydrolase (decarboxylating)	(S)-ureidoglycolate amidohydrolase (decarboxylating)	(-)-Ureidoglycolate + H2O <=> Glyoxylate + 2 NH3 + CO2	C00603 + C00001 <=> C00048 + 2 C00014 + C00011	KEGG	3.5.3.19	3.5.3.19
R00470	4-hydroxy-2-oxoglutarate glyoxylate-lyase (pyruvate-forming)	4-hydroxy-2-oxoglutarate glyoxylate-lyase (pyruvate-forming)	4-Hydroxy-2-oxoglutarate <=> Pyruvate + Glyoxylate	C01127 <=> C00022 + C00048	KEGG	4.1.3.16	4.1.3.16
R00471	D-4-Hydroxy-2-oxoglutarate glyoxylate-lyase	D-4-Hydroxy-2-oxoglutarate glyoxylate-lyase	D-4-Hydroxy-2-oxoglutarate <=> Pyruvate + Glyoxylate	C05946 <=> C00022 + C00048	KEGG	4.1.1.3，4.1.2.14，4.1.3.16	4.1.1.3
R00472	acetyl-CoA:glyoxylate C-acetyltransferase (thioester-hydrolysing, carboxymethyl-forming); L-Malate glyoxylate-lyase (CoA-acetylating)	L-Malate glyoxylate-lyase (CoA-acetylating)	(S)-Malate + CoA <=> Acetyl-CoA + H2O + Glyoxylate	C00149 + C00010 <=> C00024 + C00001 + C00048	KEGG	2.3.3.9	2.3.3.9
R00473	(3S)-3-carboxy-3-hydroxypropanoyl-CoA glyoxylate-lyase (acetyl-CoA-forming)	(3S)-3-carboxy-3-hydroxypropanoyl-CoA glyoxylate-lyase (acetyl-CoA-forming)	(3S)-3-Carboxy-3-hydroxypropanoyl-CoA <=> Acetyl-CoA + Glyoxylate	C04348 <=> C00024 + C00048	KEGG	4.1.3.24	4.1.3.24
R00474	2-oxoglutarate:glyoxylate succinaldehydetransferase (decarboxylating); 2-Hydroxy-3-oxoadipate glyoxylate-lyase (carboxylating)	2-Hydroxy-3-oxoadipate glyoxylate-lyase (carboxylating)	2-Hydroxy-3-oxoadipate + CO2 <=> 2-Oxoglutarate + Glyoxylate	C03217 + C00011 <=> C00026 + C00048	KEGG	2.2.1.5	2.2.1.5
R00475	Glycolate:oxygen 2-oxidoreductase	Glycolate:oxygen 2-oxidoreductase	Glycolate + Oxygen <=> Glyoxylate + Hydrogen peroxide	C00160 + C00007 <=> C00048 + C00027	KEGG	1.1.3.15	1.1.3.15
R00476	glycolate:acceptor 2-oxidoreductase	glycolate:acceptor 2-oxidoreductase	Glycolate + Acceptor <=> Glyoxylate + Reduced acceptor	C00160 + C00028 <=> C00048 + C00030	KEGG	1.1.99.14	1.1.99.14
R00477	3-oxalomalate glyoxylate-lyase (oxaloacetate-forming)	3-oxalomalate glyoxylate-lyase (oxaloacetate-forming)	3-Oxalomalate <=> Oxaloacetate + Glyoxylate	C01990 <=> C00036 + C00048	KEGG	4.1.3.13	4.1.3.13
R00478	erythro-3-hydroxy-Ls-aspartate glyoxylate-lyase (glycine-forming)	erythro-3-hydroxy-Ls-aspartate glyoxylate-lyase (glycine-forming)	erythro-3-Hydroxy-Ls-aspartate <=> Glycine + Glyoxylate	C03961 <=> C00037 + C00048	KEGG	4.1.3.14	4.1.3.14
R00479	isocitrate glyoxylate-lyase (succinate-forming)	isocitrate glyoxylate-lyase (succinate-forming)	Isocitrate <=> Succinate + Glyoxylate	C00311 <=> C00042 + C00048	KEGG	4.1.3.1	4.1.3.1
R00480	ATP:L-aspartate 4-phosphotransferase	ATP:L-aspartate 4-phosphotransferase	ATP + L-Aspartate <=> ADP + 4-Phospho-L-aspartate	C00002 + C00049 <=> C00008 + C03082	KEGG	2.7.2.4	2.7.2.4
R00481	L-aspartate:oxygen oxidoreductase	L-aspartate:oxygen oxidoreductase	L-Aspartate + Oxygen <=> Iminoaspartate + Hydrogen peroxide	C00049 + C00007 <=> C05840 + C00027	KEGG	1.4.3.16	1.4.3.16
R00482	L-Aspartate:ammonia ligase (ADP-forming)	L-Aspartate:ammonia ligase (ADP-forming)	ATP + L-Aspartate + NH3 <=> ADP + Orthophosphate + L-Asparagine	C00002 + C00049 + C00014 <=> C00008 + C00009 + C00152	KEGG	6.3.1.4	6.3.1.4
R00483	L-aspartate:ammonia ligase (AMP-forming)	L-aspartate:ammonia ligase (AMP-forming)	ATP + L-Aspartate + NH3 <=> AMP + Diphosphate + L-Asparagine	C00002 + C00049 + C00014 <=> C00020 + C00013 + C00152	KEGG	6.3.1.1，6.3.5.4	6.3.1.1
R00484	N-Carbamoyl-L-aspartate amidohydrolase	N-Carbamoyl-L-aspartate amidohydrolase	N-Carbamoyl-L-aspartate + H2O <=> L-Aspartate + CO2 + NH3	C00438 + C00001 <=> C00049 + C00011 + C00014	KEGG	3.5.1.7	3.5.1.7
R00485	L-Asparagine amidohydrolase	L-Asparagine amidohydrolase	L-Asparagine + H2O <=> L-Aspartate + NH3	C00152 + C00001 <=> C00049 + C00014	KEGG	3.5.1.1，3.5.1.38	3.5.1.1
R00486	3-Cyano-L-alanine aminohydrolase	3-Cyano-L-alanine aminohydrolase	3-Cyano-L-alanine + 2 H2O <=> L-Aspartate + NH3	C02512 + 2 C00001 <=> C00049 + C00014	KEGG	3.5.5.4	3.5.5.4
R00487	Acetyl-CoA:L-aspartate N-acetyltransferase	Acetyl-CoA:L-aspartate N-acetyltransferase	Acetyl-CoA + L-Aspartate <=> CoA + N-Acetyl-L-aspartate	C00024 + C00049 <=> C00010 + C01042	KEGG	2.3.1.17	2.3.1.17
R00488	N-Acetyl-L-aspartate amidohydrolase	N-Acetyl-L-aspartate amidohydrolase	N-Acetyl-L-aspartate + H2O <=> Acetate + L-Aspartate	C01042 + C00001 <=> C00033 + C00049	KEGG	3.5.1.15	3.5.1.15
R00489	L-aspartate 1-carboxy-lyase (beta-alanine-forming)	L-aspartate 1-carboxy-lyase (beta-alanine-forming)	L-Aspartate <=> beta-Alanine + CO2	C00049 <=> C00099 + C00011	KEGG	4.1.1.11，4.1.1.15	4.1.1.11
R00490	L-Aspartate ammonia-lyase	L-Aspartate ammonia-lyase	L-Aspartate <=> Fumarate + NH3	C00049 <=> C00122 + C00014	KEGG	3.5.1.38，4.3.1.1	3.5.1.38
R00491	aspartate racemase	aspartate racemase	L-Aspartate <=> D-Aspartate	C00049 <=> C00402	KEGG	5.1.1.13	5.1.1.13
R00493	L-aspartate:2-oxo acid aminotransferase	L-aspartate:2-oxo acid aminotransferase	L-Aspartate + 2-Oxo acid <=> alpha-Amino acid + Oxaloacetate	C00049 + C00161 <=> C05167 + C00036	KEGG	2.6.1.-	2.6.1.-
R00494	glutathione gamma-glutamylaminopeptidase	glutathione gamma-glutamylaminopeptidase	Glutathione + H2O <=> Cys-Gly + L-Glutamate	C00051 + C00001 <=> C01419 + C00025	KEGG	2.3.2.2	2.3.2.2
R00497	gamma-L-glutamyl-L-cysteine:glycine ligase (ADP-forming)	gamma-L-glutamyl-L-cysteine:glycine ligase (ADP-forming)	ATP + gamma-L-Glutamyl-L-cysteine + Glycine <=> ADP + Orthophosphate + Glutathione	C00002 + C00669 + C00037 <=> C00008 + C00009 + C00051	KEGG	6.3.2.3	6.3.2.3
R00499	S-Succinylglutathione hydrolase	S-Succinylglutathione hydrolase	S-Succinylglutathione + H2O <=> Glutathione + Succinate	C03174 + C00001 <=> C00051 + C00042	KEGG	3.1.2.13	3.1.2.13
R00501	UDP-D-galactose:NAD+ 6-oxidoreductase	UDP-D-galactose:NAD+ 6-oxidoreductase	UDP-D-galactose + 2 NAD+ + H2O <=> UDP-D-galacturonate + 2 NADH + 2 H+	C00052 + 2 C00003 + C00001 <=> C00617 + 2 C00004 + 2 C00080	KEGG	1.1.1.-	1.1.1.-
R00502	UTP:alpha-D-galactose-1-phosphate uridylyltransferase	UTP:alpha-D-galactose-1-phosphate uridylyltransferase	UTP + alpha-D-Galactose 1-phosphate <=> Diphosphate + UDP-D-galactose	C00075 + C00446 <=> C00013 + C00052	KEGG	2.7.7.10	2.7.7.10
R00503	UDP-galactose:D-glucose 4-beta-D-galactosyltransferase	UDP-galactose:D-glucose 4-beta-D-galactosyltransferase	UDP-D-galactose + D-Glucose <=> UDP + Lactose	C00052 + C00031 <=> C00015 + C00243	KEGG	2.4.1.22	2.4.1.22
R00504	UDP-galactose:UDP-N-acetyl-D-glucosamine galactose phosphotransferase	UDP-galactose:UDP-N-acetyl-D-glucosamine galactose phosphotransferase	UDP-D-galactose + UDP-N-acetyl-D-glucosamine <=> UMP + UDP-N-acetyl-6-(D-galactose-1-phospho)-D-glucosamine	C00052 + C00043 <=> C00105 + C04739	KEGG	2.7.8.18	2.7.8.18
R00505	UDP-D-galactopyranose furanomutase	UDP-D-galactopyranose furanomutase	UDP-D-galactose <=> UDP-alpha-D-galacto-1,4-furanose	C00052 <=> C03733	KEGG	5.4.99.9	5.4.99.9
R00506	UDP-galactose:galactan beta-1,4-D-galactosyltransferase	UDP-galactose:galactan beta-1,4-D-galactosyltransferase	UDP-D-galactose + Galactan <=> Galactan + UDP	C00052 + C05796 <=> C05796 + C00015	KEGG	2.4.1.-	2.4.1.-
R00507	3'-phosphoadenylyl-sulfate sulfohydrolase; 3'-phosphoadenylyl-sulfate nucleotidohydrolase	3'-phosphoadenylyl-sulfate sulfohydrolase	3'-Phosphoadenylyl sulfate + H2O <=> Sulfate + Adenosine 3',5'-bisphosphate	C00053 + C00001 <=> C00059 + C00054	KEGG	3.6.1.9，3.6.2.2	3.6.1.9
R00508	3'-Phospho-5'-adenylyl sulfate 3'-phosphohydrolase	3'-Phospho-5'-adenylyl sulfate 3'-phosphohydrolase	3'-Phosphoadenylyl sulfate + H2O <=> Adenylyl sulfate + Orthophosphate	C00053 + C00001 <=> C00224 + C00009	KEGG	3.1.3.7	3.1.3.7
R00509	ATP:adenylylsulfate 3'-phosphotransferase	ATP:adenylylsulfate 3'-phosphotransferase	ATP + Adenylyl sulfate <=> ADP + 3'-Phosphoadenylyl sulfate	C00002 + C00224 <=> C00008 + C00053	KEGG	2.7.1.25	2.7.1.25
R00510	Cytidine-5'-monophosphate phosphoribohydrolase	Cytidine-5'-monophosphate phosphoribohydrolase	CMP + H2O <=> Cytosine + D-Ribose 5-phosphate	C00055 + C00001 <=> C00380 + C00117	KEGG	3.2.2.10	3.2.2.10
R00511	Cytidine-5'-monophosphate phosphohydrolase	Cytidine-5'-monophosphate phosphohydrolase	CMP + H2O <=> Cytidine + Orthophosphate	C00055 + C00001 <=> C00475 + C00009	KEGG	3.1.3.5	3.1.3.5
R00512	ATP:CMP phosphotransferase	ATP:CMP phosphotransferase	ATP + CMP <=> ADP + CDP	C00002 + C00055 <=> C00008 + C00112	KEGG	2.7.4.14	2.7.4.14
R00513	ATP:cytidine 5'-phosphotransferase	ATP:cytidine 5'-phosphotransferase	ATP + Cytidine <=> ADP + CMP	C00002 + C00475 <=> C00008 + C00055	KEGG	2.7.1.48	2.7.1.48
R00514	CDP phosphohydrolase	CDP phosphohydrolase	CDP + H2O <=> CMP + Orthophosphate	C00112 + C00001 <=> C00055 + C00009	KEGG	3.6.1.5	3.6.1.5
R00515	CTP diphosphohydrolase (diphosphate-forming); CTP pyrophosphohydrolase	CTP pyrophosphohydrolase	CTP + H2O <=> CMP + Diphosphate	C00063 + C00001 <=> C00055 + C00013	KEGG	3.6.1.8	3.6.1.8
R00516	UTP:cytidine 5'-phosphotransferase	UTP:cytidine 5'-phosphotransferase	UTP + Cytidine <=> UDP + CMP	C00075 + C00475 <=> C00015 + C00055	KEGG	2.7.1.48	2.7.1.48
R00517	GTP:cytidine 5'-phosphotransferase	GTP:cytidine 5'-phosphotransferase	GTP + Cytidine <=> GDP + CMP	C00044 + C00475 <=> C00035 + C00055	KEGG	2.7.1.48	2.7.1.48
R00518	ATP:formate phosphotransferase	ATP:formate phosphotransferase	ATP + Formate <=> ADP + Formyl phosphate	C00002 + C00058 <=> C00008 + C02405	KEGG	2.7.2.6	2.7.2.6
R00519	Formate:NAD+ oxidoreductase	Formate:NAD+ oxidoreductase	Formate + NAD+ <=> H+ + CO2 + NADH	C00058 + C00003 <=> C00080 + C00011 + C00004	KEGG	1.2.1.2	1.2.1.2
R00521	Formyl-CoA hydrolase	Formyl-CoA hydrolase	Formyl-CoA + H2O <=> CoA + Formate	C00798 + C00001 <=> C00010 + C00058	KEGG	3.1.2.10	3.1.2.10
R00522	Oxalate carboxy-lyase	Oxalate carboxy-lyase	Oxalate <=> Formate + CO2	C00209 <=> C00058 + C00011	KEGG	4.1.1.2	4.1.1.2
R00524	Formamide amidohydrolase	Formamide amidohydrolase	Formamide + H2O <=> Formate + NH3	C00488 + C00001 <=> C00058 + C00014	KEGG	3.5.1.49	3.5.1.49
R00525	N-Formyl-L-glutamate amidohydrolase	N-Formyl-L-glutamate amidohydrolase	N-Formyl-L-glutamate + H2O <=> Formate + L-Glutamate	C01045 + C00001 <=> C00058 + C00025	KEGG	3.5.1.68	3.5.1.68
R00526	N-Formyl-L-aspartate amidohydrolase	N-Formyl-L-aspartate amidohydrolase	N-Formyl-L-aspartate + H2O <=> Formate + L-Aspartate	C01044 + C00001 <=> C00058 + C00049	KEGG	3.5.1.8，3.5.1.15	3.5.1.8
R00527	S-Formylglutathione hydrolase	S-Formylglutathione hydrolase	S-Formylglutathione + H2O <=> Formate + Glutathione	C01031 + C00001 <=> C00058 + C00051	KEGG	3.1.2.12	3.1.2.12
R00528	Sulfite:ferricytochrome-c oxidoreductase	Sulfite:ferricytochrome-c oxidoreductase	Sulfite + H2O + 2 Ferricytochrome c <=> Sulfate + 2 Ferrocytochrome c + 2 H+	C00094 + C00001 + 2 C00125 <=> C00059 + 2 C00126 + 2 C00080	KEGG	1.8.2.1	1.8.2.1
R00529	ATP:sulfate adenylyltransferase	ATP:sulfate adenylyltransferase	ATP + Sulfate <=> Diphosphate + Adenylyl sulfate	C00002 + C00059 <=> C00013 + C00224	KEGG	2.7.7.4	2.7.7.4
R00530	ADP:sulfate adenylyltransferase	ADP:sulfate adenylyltransferase	ADP + Sulfate <=> Orthophosphate + Adenylyl sulfate	C00008 + C00059 <=> C00009 + C00224	KEGG	2.7.7.5	2.7.7.5
R00531	Adenylylsulfate sulfohydrolase	Adenylylsulfate sulfohydrolase	Adenylyl sulfate + H2O <=> AMP + Sulfate	C00224 + C00001 <=> C00020 + C00059	KEGG	3.6.2.1	3.6.2.1
R00532	L-Serine-O-sulfate ammonia-lyase (pyruvate-forming)	L-Serine-O-sulfate ammonia-lyase (pyruvate-forming)	L-Serine O-sulfate + H2O <=> Pyruvate + NH3 + Sulfate	C02703 + C00001 <=> C00022 + C00014 + C00059	KEGG	4.3.1.10	4.3.1.10
R00533	Sulfite:oxygen oxidoreductase	Sulfite:oxygen oxidoreductase	Sulfite + Oxygen + H2O <=> Sulfate + Hydrogen peroxide	C00094 + C00007 + C00001 <=> C00059 + C00027	KEGG	1.8.3.1	1.8.3.1
R00534	D-Glucose 6-sulfate sulfohydrolase	D-Glucose 6-sulfate sulfohydrolase	D-Glucose 6-sulfate + H2O <=> D-Glucose + Sulfate	C02827 + C00001 <=> C00031 + C00059	KEGG	3.1.6.3	3.1.6.3
R00535	3'-Phosphoadenylylsulfate:17beta-estradiol 3-sulfotransferase	3'-Phosphoadenylylsulfate:17beta-estradiol 3-sulfotransferase	3'-Phosphoadenylyl sulfate + Estradiol <=> Adenosine 3',5'-bisphosphate + Estradiol-17beta 3-sulfate	C00053 + C00951 <=> C00054 + C08357	KEGG	2.8.2.15	2.8.2.15
R00536	3'-Phosphoadenylylsulfate:phenolic-steroid sulfotransferase	3'-Phosphoadenylylsulfate:phenolic-steroid sulfotransferase	3'-Phosphoadenylyl sulfate + 2-Methoxyestrone <=> Adenosine 3',5'-bisphosphate + 2-Methoxyestrone 3-sulfate	C00053 + C05299 <=> C00054 + C08358	KEGG	2.8.2.15	2.8.2.15
R00537	3'-Phosphoadenylylsulfate:phenolic-steroid sulfotransferase	3'-Phosphoadenylylsulfate:phenolic-steroid sulfotransferase	3'-Phosphoadenylyl sulfate + 2-Methoxyestradiol-17beta <=> Adenosine 3',5'-bisphosphate + 2-Methoxyestradiol-17beta 3-sulfate	C00053 + C05302 <=> C00054 + C08359	KEGG	2.8.2.15	2.8.2.15
R00538	Aldehyde:NAD+ oxidoreductase	Aldehyde:NAD+ oxidoreductase	Aldehyde + NAD+ + H2O <=> Carboxylate + NADH + H+	C00071 + C00003 + C00001 <=> C00060 + C00004 + C00080	KEGG	1.2.1.3，1.2.1.5	1.2.1.3
R00539	Acyl phosphate phosphohydrolase	Acyl phosphate phosphohydrolase	Acyl phosphate + H2O <=> Carboxylate + Orthophosphate	C02133 + C00001 <=> C00060 + C00009	KEGG	3.6.1.7	3.6.1.7
R00540	Nitrile aminohydrolase	Nitrile aminohydrolase	Nitrile + 2 H2O <=> Carboxylate + NH3	C00726 + 2 C00001 <=> C00060 + C00014	KEGG	3.5.5.1，3.5.5.2，3.5.5.5，3.5.5.7	3.5.5.1
R00542	5'-Acylphosphoadenosine acylhydrolase	5'-Acylphosphoadenosine acylhydrolase	5'-Acylphosphoadenosine + H2O <=> AMP + Carboxylate	C03361 + C00001 <=> C00020 + C00060	KEGG	3.6.1.20	3.6.1.20
R00543	3-Acylpyruvate acylhydrolase	3-Acylpyruvate acylhydrolase	3-Acylpyruvate + H2O <=> Carboxylate + Pyruvate	C02119 + C00001 <=> C00060 + C00022	KEGG	3.7.1.5	3.7.1.5
R00544	aldehyde:acceptor oxidoreductase	aldehyde:acceptor oxidoreductase	Aldehyde + Acceptor + H2O <=> Carboxylate + Reduced acceptor	C00071 + C00028 + C00001 <=> C00060 + C00030	KEGG	1.2.99.3，1.2.99.6，1.2.99.7	1.2.99.3
R00545	N6-Acyl-L-lysine amidohydrolase	N6-Acyl-L-lysine amidohydrolase	N6-Acyl-L-lysine + H2O <=> Carboxylate + L-Lysine	C02444 + C00001 <=> C00060 + C00047	KEGG	3.5.1.17	3.5.1.17
R00546	N-Acyl-L-aspartate amidohydrolase	N-Acyl-L-aspartate amidohydrolase	N-Acyl-L-aspartate + H2O <=> Carboxylate + L-Aspartate	C02715 + C00001 <=> C00060 + C00049	KEGG	3.5.1.15	3.5.1.15
R00547	S-Acylglutathione hydrolase	S-Acylglutathione hydrolase	S-Acylglutathione + H2O <=> Carboxylate + Glutathione	C02589 + C00001 <=> C00060 + C00051	KEGG	3.1.2.7	3.1.2.7
R00548	riboflavin-5-phosphate phosphohydrolase (acid optimum)	riboflavin-5-phosphate phosphohydrolase (acid optimum)	FMN + H2O <=> Riboflavin + Orthophosphate	C00061 + C00001 <=> C00255 + C00009	KEGG	3.1.3.2	3.1.3.2
R00549	ATP:riboflavin 5'-phosphotransferase	ATP:riboflavin 5'-phosphotransferase	ATP + Riboflavin <=> ADP + FMN	C00002 + C00255 <=> C00008 + C00061	KEGG	2.7.1.26	2.7.1.26
R00550	D-Glucose-1-phosphate:riboflavin 5'-phosphotransferase	D-Glucose-1-phosphate:riboflavin 5'-phosphotransferase	D-Glucose 1-phosphate + Riboflavin <=> D-Glucose + FMN	C00103 + C00255 <=> C00031 + C00061	KEGG	2.7.1.42	2.7.1.42
R00551	L-Arginine amidinohydrolase	L-Arginine amidinohydrolase	L-Arginine + H2O <=> L-Ornithine + Urea	C00062 + C00001 <=> C00077 + C00086	KEGG	3.5.3.1	3.5.3.1
R00552	L-Arginine iminohydrolase	L-Arginine iminohydrolase	L-Arginine + H2O <=> L-Citrulline + NH3	C00062 + C00001 <=> C00327 + C00014	KEGG	3.5.3.6	3.5.3.6
R00554	ATP:L-arginine Nomega-phosphotransferase	ATP:L-arginine Nomega-phosphotransferase	ATP + L-Arginine <=> ADP + L-Arginine phosphate	C00002 + C00062 <=> C00008 + C05945	KEGG	2.7.3.3	2.7.3.3
R00555	NAD+:protein-L-arginine ADP-D-ribosyltransferase	NAD+:protein-L-arginine ADP-D-ribosyltransferase	NAD+ + Protein-L-arginine <=> Nicotinamide + Protein-omega-N-(ADP-D-ribosyl)-L-arginine	C00003 + C00613 <=> C00153 + C16011	KEGG	2.4.2.31	2.4.2.31
R00557	L-Arginine,NADPH:oxygen oxidoreductase (nitric-oxide-forming)	L-Arginine,NADPH:oxygen oxidoreductase (nitric-oxide-forming)	2 L-Arginine + 4 Oxygen + 3 NADPH + 3 H+ <=> 2 Nitric oxide + 2 L-Citrulline + 3 NADP+ + 4 H2O	2 C00062 + 4 C00007 + 3 C00005 + 3 C00080 <=> 2 C00533 + 2 C00327 + 3 C00006 + 4 C00001	KEGG	1.14.13.39	1.14.13.39
R00558	L-Arginine,NADPH:oxygen oxidoreductase (N-(omega)-hydroxyarginine-forming)	L-Arginine,NADPH:oxygen oxidoreductase (N-(omega)-hydroxyarginine-forming)	L-Arginine + Oxygen + NADPH + H+ <=> N-(omega)-Hydroxyarginine + NADP+ + H2O	C00062 + C00007 + C00005 + C00080 <=> C05933 + C00006 + C00001	KEGG	1.14.13.39	1.14.13.39
R00559	L-Arginine:oxygen 2-oxidoreductase (decarboxylating)	L-Arginine:oxygen 2-oxidoreductase (decarboxylating)	L-Arginine + Oxygen <=> 4-Guanidinobutanamide + CO2 + H2O	C00062 + C00007 <=> C03078 + C00011 + C00001	KEGG	1.13.12.1	1.13.12.1
R00562	N2-(D-1-carboxyethyl)-L-arginine:NAD+ oxidoreductase (L-arginine-forming)	N2-(D-1-carboxyethyl)-L-arginine:NAD+ oxidoreductase (L-arginine-forming)	D-Octopine + NAD+ + H2O <=> L-Arginine + Pyruvate + NADH + H+	C04137 + C00003 + C00001 <=> C00062 + C00022 + C00004 + C00080	KEGG	1.5.1.11	1.5.1.11
R00563	N2-(D-1,3-dicarboxypropyl)-L-arginine:NADP+ oxidoreductase (L-arginine-forming); D-nopaline:NADP+ oxidoreductase (L-arginine-forming)	N2-(D-1,3-dicarboxypropyl)-L-arginine:NADP+ oxidoreductase (L-arginine-forming);	Nopaline + NADP+ + H2O <=> L-Arginine + 2-Oxoglutarate + NADPH + H+	C01682 + C00006 + C00001 <=> C00062 + C00026 + C00005 + C00080	KEGG	1.5.1.19	1.5.1.19
R00565	L-Arginine:glycine amidinotransferase	L-Arginine:glycine amidinotransferase	L-Arginine + Glycine <=> L-Ornithine + Guanidinoacetate	C00062 + C00037 <=> C00077 + C00581	KEGG	2.1.4.1	2.1.4.1
R00566	L-arginine carboxy-lyase (agmatine-forming)	L-arginine carboxy-lyase (agmatine-forming)	L-Arginine <=> Agmatine + CO2	C00062 <=> C00179 + C00011	KEGG	4.1.1.19	4.1.1.19
R00567	arginine racemase	arginine racemase	L-Arginine <=> D-Arginine	C00062 <=> C00792	KEGG	5.1.1.9	5.1.1.9
R00568	CTP aminohydrolase	CTP aminohydrolase	CTP + H2O <=> UTP + NH3	C00063 + C00001 <=> C00075 + C00014	KEGG	3.5.4.13	3.5.4.13
R00569	CTP phosphohydrolase	CTP phosphohydrolase	CTP + H2O <=> CDP + Orthophosphate	C00063 + C00001 <=> C00112 + C00009	KEGG	3.6.1.5	3.6.1.5
R00570	ATP:CDP phosphotransferase	ATP:CDP phosphotransferase	ATP + CDP <=> ADP + CTP	C00002 + C00112 <=> C00008 + C00063	KEGG	2.7.4.6	2.7.4.6
R00571	UTP:ammonia ligase (ADP-forming)	UTP:ammonia ligase (ADP-forming)	ATP + UTP + NH3 <=> ADP + Orthophosphate + CTP	C00002 + C00075 + C00014 <=> C00008 + C00009 + C00063	KEGG	6.3.4.2	6.3.4.2
R00572	CTP:pyruvate 2-O-phosphotransferase	CTP:pyruvate 2-O-phosphotransferase	CTP + Pyruvate <=> CDP + Phosphoenolpyruvate	C00063 + C00022 <=> C00112 + C00074	KEGG	2.7.1.40	2.7.1.40
R00573	UTP:L-glutamine amido-ligase (ADP-forming)	UTP:L-glutamine amido-ligase (ADP-forming)	ATP + UTP + L-Glutamine + H2O <=> ADP + Orthophosphate + CTP + L-Glutamate	C00002 + C00075 + C00064 + C00001 <=> C00008 + C00009 + C00063 + C00025	KEGG	6.3.4.2	6.3.4.2
R00574	CTP diphosphate-lyase (cyclizing; 3',5'-cyclic-CMP-forming)	CTP diphosphate-lyase (cyclizing; 3',5'-cyclic-CMP-forming)	CTP <=> 3',5'-Cyclic CMP + Diphosphate	C00063 <=> C00941 + C00013	KEGG	4.6.1.6	4.6.1.6
R00575	hydrogen-carbonate:L-glutamine amido-ligase (ADP-forming, carbamate-phosphorylating)	hydrogen-carbonate:L-glutamine amido-ligase (ADP-forming, carbamate-phosphorylating)	2 ATP + L-Glutamine + HCO3- + H2O <=> 2 ADP + Orthophosphate + L-Glutamate + Carbamoyl phosphate	2 C00002 + C00064 + C00288 + C00001 <=> 2 C00008 + C00009 + C00025 + C00169	KEGG	6.3.5.5	6.3.5.5
R00576	L-Glutamine:pyruvate aminotransferase	L-Glutamine:pyruvate aminotransferase	L-Glutamine + Pyruvate <=> 2-Oxoglutaramate + L-Alanine	C00064 + C00022 <=> C00940 + C00041	KEGG	2.6.1.15	2.6.1.15
R00577	acyl-CoA:L-glutamine N-acyltransferase	acyl-CoA:L-glutamine N-acyltransferase	Acyl-CoA + L-Glutamine <=> CoA + N-Acyl-L-glutamine	C00040 + C00064 <=> C00010 + C02716	KEGG	2.3.1.68	2.3.1.68
R00578	L-aspartate:L-glutamine amido-ligase (AMP-forming)	L-aspartate:L-glutamine amido-ligase (AMP-forming)	ATP + L-Aspartate + L-Glutamine + H2O <=> AMP + Diphosphate + L-Asparagine + L-Glutamate	C00002 + C00049 + C00064 + C00001 <=> C00020 + C00013 + C00152 + C00025	KEGG	6.3.5.4	6.3.5.4
R00579	glutamine racemase	glutamine racemase	L-Glutamine <=> D-Glutamine	C00064 <=> C00819	KEGG	5.1.1.10	5.1.1.10
R00581	L-serine:NAD+ oxidoreductase (deaminating)	L-serine:NAD+ oxidoreductase (deaminating)	L-Serine + NAD+ + H2O <=> Hydroxypyruvate + NH3 + NADH + H+	C00065 + C00003 + C00001 <=> C00168 + C00014 + C00004 + C00080	KEGG	1.4.1.7	1.4.1.7
R00582	O-phospho-L-serine phosphohydrolase	O-phospho-L-serine phosphohydrolase	O-Phospho-L-serine + H2O <=> L-Serine + Orthophosphate	C01005 + C00001 <=> C00065 + C00009	KEGG	3.1.3.3	3.1.3.3
R00584	diphosphate:L-serine O-phosphotransferase	diphosphate:L-serine O-phosphotransferase	Diphosphate + L-Serine <=> Orthophosphate + O-Phospho-L-serine	C00013 + C00065 <=> C00009 + C01005	KEGG	2.7.1.80	2.7.1.80
R00585	L-Serine:pyruvate aminotransferase	L-Serine:pyruvate aminotransferase	L-Serine + Pyruvate <=> Hydroxypyruvate + L-Alanine	C00065 + C00022 <=> C00168 + C00041	KEGG	2.6.1.51	2.6.1.51
R00586	acetyl-CoA:L-serine O-acetyltransferase	acetyl-CoA:L-serine O-acetyltransferase	L-Serine + Acetyl-CoA <=> O-Acetyl-L-serine + CoA	C00065 + C00024 <=> C00979 + C00010	KEGG	2.3.1.30	2.3.1.30
R00588	L-Serine:glyoxylate aminotransferase	L-Serine:glyoxylate aminotransferase	L-Serine + Glyoxylate <=> Hydroxypyruvate + Glycine	C00065 + C00048 <=> C00168 + C00037	KEGG	2.6.1.45	2.6.1.45
R00589	serine racemase; L-2-Amino-3-hydroxypropionic acid racemase	serine racemase	L-Serine <=> D-Serine	C00065 <=> C00740	KEGG	5.1.1.10，5.1.1.18	5.1.1.10
R00590	L-Serine hydro-lyase	L-Serine hydro-lyase	L-Serine <=> Dehydroalanine + H2O	C00065 <=> C02218 + C00001	KEGG	4.3.1.17	4.3.1.17
R00594	S-Adenosyl-L-methionine:tRNA uracil 5-methyltransferase; S-Adenosyl-L-methionine:tRNA (uracil-5-)-methyltransferase	S-Adenosyl-L-methionine:tRNA uracil 5-methyltransferase	S-Adenosyl-L-methionine + tRNA containing uridine at position 54 <=> S-Adenosyl-L-homocysteine + tRNA containing ribothymidine at position 54	C00019 + C01764 <=> C00021 + C03446	KEGG	2.1.1.35	2.1.1.35
R00595	S-adenosyl-L-methionine:tRNA cytosine 5-methyltransferase; S-adenosyl-L-methionine:tRNA (cytosine-5-)-methyltransferase	S-adenosyl-L-methionine:tRNA cytosine 5-methyltransferase	S-Adenosyl-L-methionine + tRNA cytosine <=> S-Adenosyl-L-homocysteine + tRNA containing 5-methylcytosine	C00019 + C17325 <=> C00021 + C04155	KEGG	2.1.1.29	2.1.1.29
R00596	S-adenosyl-L-methionine:tRNA adenine N1-methyltransferase; S-adenosyl-L-methionine:tRNA (adenine-N1-)-methyltransferase	S-adenosyl-L-methionine:tRNA adenine N1-methyltransferase	S-Adenosyl-L-methionine + tRNA adenine <=> S-Adenosyl-L-homocysteine + tRNA containing N1-methyladenine	C00019 + C17324 <=> C00021 + C04156	KEGG	2.1.1.36	2.1.1.36
R00597	S-Adenosyl-L-methionine:tRNA guanine N1-methyltransferase; S-Adenosyl-L-methionine:tRNA (guanine-N1-)-methyltransferase	S-Adenosyl-L-methionine:tRNA guanine N1-methyltransferase	S-Adenosyl-L-methionine + tRNA guanine <=> S-Adenosyl-L-homocysteine + tRNA containing N1-methylguanine	C00019 + C01977 <=> C00021 + C04157	KEGG	2.1.1.31	2.1.1.31
R00598	S-Adenosyl-L-methionine:tRNA guanine N2-methyltransferase; S-Adenosyl-L-methionine:tRNA (guanine-N2-)-methyltransferase	S-Adenosyl-L-methionine:tRNA guanine N2-methyltransferase	S-Adenosyl-L-methionine + tRNA guanine <=> S-Adenosyl-L-homocysteine + tRNA containing N2-methylguanine	C00019 + C01977 <=> C00021 + C04158	KEGG	2.1.1.32	2.1.1.32
R00599	S-adenosyl-L-methionine:tRNA adenine N6-methyltransferase; S-adenosyl-L-methionine:tRNA (adenine-N6-)-methyltransferase	S-adenosyl-L-methionine:tRNA adenine N6-methyltransferase	S-Adenosyl-L-methionine + tRNA adenine <=> S-Adenosyl-L-homocysteine + tRNA containing N6-methyladenine	C00019 + C17324 <=> C00021 + C04159	KEGG	2.1.1.55	2.1.1.55
R00600	S-Adenosyl-L-methionine:tRNA guanine N7-methyltransferase; S-Adenosyl-L-methionine:tRNA (guanine-N7-)-methyltransferase	S-Adenosyl-L-methionine:tRNA guanine N7-methyltransferase	S-Adenosyl-L-methionine + tRNA guanine <=> S-Adenosyl-L-homocysteine + tRNA containing N7-methylguanine	C00019 + C01977 <=> C00021 + C04160	KEGG	2.1.1.33	2.1.1.33
R00601	S-adenosyl-L-methionine:tRNA 5-methylaminomethyl-2-thiouridine methyltransferase; S-adenosyl-L-methionine:tRNA (5-methylaminomethyl-2-thiouridylate)-methyltransferase	S-adenosyl-L-methionine:tRNA 5-methylaminomethyl-2-thiouridine methyltransferase	S-Adenosyl-L-methionine + tRNA containing 5-aminomethyl-2-thiouridine <=> S-Adenosyl-L-homocysteine + tRNA containing 5-methylaminomethyl-2-thiouridylate	C00019 + C11478 <=> C00021 + C04728	KEGG	2.1.1.61	2.1.1.61
R00602	methanol:hydrogen-peroxide oxidoreductase	methanol:hydrogen-peroxide oxidoreductase	Methanol + Hydrogen peroxide <=> Formaldehyde + 2 H2O	C00132 + C00027 <=> C00067 + 2 C00001	KEGG	1.11.1.6，1.11.1.7	1.11.1.6
R00603	dichloromethane chloride-lyase (adding H2O; chloride-hydrolysing; formaldehyde-forming)	dichloromethane chloride-lyase (adding H2O; chloride-hydrolysing; formaldehyde-forming)	Dichloromethane + H2O <=> Formaldehyde + 2 Hydrochloric acid	C02271 + C00001 <=> C00067 + 2 C01327	KEGG	4.5.1.3	4.5.1.3
R00604	Formaldehyde:NAD+ oxidoreductase	Formaldehyde:NAD+ oxidoreductase	Formaldehyde + NAD+ + H2O <=> Formate + NADH + H+	C00067 + C00003 + C00001 <=> C00058 + C00004 + C00080	KEGG	1.2.1.46	1.2.1.46
R00605	methanol:NAD+ oxidoreductase	methanol:NAD+ oxidoreductase	Methanol + NAD+ <=> Formaldehyde + NADH + H+	C00132 + C00003 <=> C00067 + C00004 + C00080	KEGG	1.1.1.244	1.1.1.244
R00606	methylamine:acceptor oxidoreductase (deaminating)	methylamine:acceptor oxidoreductase (deaminating)	Methylamine + H2O + Acceptor <=> Formaldehyde + NH3 + Reduced acceptor	C00218 + C00001 + C00028 <=> C00067 + C00014 + C00030	KEGG	1.4.99.3	1.4.99.3
R00608	Methanol:oxygen oxidereductase	Methanol:oxygen oxidereductase	Methanol + Oxygen <=> Formaldehyde + Hydrogen peroxide	C00132 + C00007 <=> C00067 + C00027	KEGG	1.1.3.13	1.1.3.13
R00609	N-methyl-L-glutamate:acceptor oxidoreductase (demethylating)	N-methyl-L-glutamate:acceptor oxidoreductase (demethylating)	N-Methyl-L-glutamate + Acceptor + H2O <=> L-Glutamate + Formaldehyde + Reduced acceptor	C01046 + C00028 + C00001 <=> C00025 + C00067 + C00030	KEGG	1.5.99.5	1.5.99.5
R00610	sarcosine:oxygen oxidoreductase (demethylating)	sarcosine:oxygen oxidoreductase (demethylating)	Sarcosine + H2O + Oxygen <=> Glycine + Formaldehyde + Hydrogen peroxide	C00213 + C00001 + C00007 <=> C00037 + C00067 + C00027	KEGG	1.5.3.1	1.5.3.1
R00611	sarcosine:acceptor oxidoreductase (demethylating)	sarcosine:acceptor oxidoreductase (demethylating)	Sarcosine + Acceptor + H2O <=> Glycine + Formaldehyde + Reduced acceptor	C00213 + C00028 + C00001 <=> C00037 + C00067 + C00030	KEGG	1.5.99.1	1.5.99.1
R00612	N6-Methyl-L-lysine:oxygen oxidoreductase (demethylating)	N6-Methyl-L-lysine:oxygen oxidoreductase (demethylating)	N6-Methyl-L-lysine + H2O + Oxygen <=> L-Lysine + Formaldehyde + Hydrogen peroxide	C02728 + C00001 + C00007 <=> C00047 + C00067 + C00027	KEGG	1.5.3.4	1.5.3.4
R00614	Formaldehyde:formaldehyde oxidoreductase	Formaldehyde:formaldehyde oxidoreductase	2 Formaldehyde + H2O <=> Formate + Methanol	2 C00067 + C00001 <=> C00058 + C00132	KEGG	1.2.99.4	1.2.99.4
R00615	Thiamin diphosphate phosphohydrolase	Thiamin diphosphate phosphohydrolase	Thiamin diphosphate + H2O <=> Thiamin monophosphate + Orthophosphate	C00068 + C00001 <=> C01081 + C00009	KEGG	3.6.1.15	3.6.1.15
R00616	ATP:thiamine-diphosphate phosphotransferase	ATP:thiamine-diphosphate phosphotransferase	ATP + Thiamin diphosphate <=> ADP + Thiamin triphosphate	C00002 + C00068 <=> C00008 + C03028	KEGG	2.7.4.15，2.7.6.2	2.7.4.15
R00617	ATP:thiamin-phosphate phosphotransferase	ATP:thiamin-phosphate phosphotransferase	ATP + Thiamin monophosphate <=> ADP + Thiamin diphosphate	C00002 + C01081 <=> C00008 + C00068	KEGG	2.7.4.16	2.7.4.16
R00618	Thiamin-triphosphate phosphohydrolase	Thiamin-triphosphate phosphohydrolase	Thiamin triphosphate + H2O <=> Thiamin diphosphate + Orthophosphate	C03028 + C00001 <=> C00068 + C00009	KEGG	3.6.1.28	3.6.1.28
R00619	ATP:thiamine diphosphotransferase	ATP:thiamine diphosphotransferase	ATP + Thiamine <=> AMP + Thiamin diphosphate	C00002 + C00378 <=> C00020 + C00068	KEGG	2.7.6.2	2.7.6.2
R00621	NO NAME	NO NAME	2-Oxoglutarate + Thiamin diphosphate <=> 3-Carboxy-1-hydroxypropyl-ThPP + CO2	C00026 + C00068 <=> C05381 + C00011	KEGG	1.2.4.2	1.2.4.2
R00623	primary_alcohol:NAD+ oxidoreductase	primary_alcohol:NAD+ oxidoreductase	Primary alcohol + NAD+ <=> Aldehyde + NADH + H+	C00226 + C00003 <=> C00071 + C00004 + C00080	KEGG	1.1.1.1，1.1.1.71	1.1.1.1
R00624	Secondary_alcohol:NAD+ oxidoreductase	Secondary_alcohol:NAD+ oxidoreductase	Secondary alcohol + NAD+ <=> Ketone + NADH + H+	C01612 + C00003 <=> C01450 + C00004 + C00080	KEGG	1.1.1.1	1.1.1.1
R00625	primary_alcohol:NADP+ oxidoreductase	primary_alcohol:NADP+ oxidoreductase	Primary alcohol + NADP+ <=> Aldehyde + NADPH + H+	C00226 + C00006 <=> C00071 + C00005 + C00080	KEGG	1.1.1.2，1.1.1.71	1.1.1.2
R00626	phosphate-monoester phosphohydrolase	phosphate-monoester phosphohydrolase	Orthophosphoric monoester + H2O <=> Alcohol + Orthophosphate	C01153 + C00001 <=> C00069 + C00009	KEGG	3.1.3.1，3.1.3.2	3.1.3.1
R00627	Acetyl-CoA:alcohol O-acetyltransferase	Acetyl-CoA:alcohol O-acetyltransferase	Acetyl-CoA + Alcohol <=> CoA + Acetic ester	C00024 + C00069 <=> C00010 + C01883	KEGG	2.3.1.84	2.3.1.84
R00628	Acetic-ester acetylhydrolase	Acetic-ester acetylhydrolase	Acetic ester + H2O <=> Alcohol + Acetate	C01883 + C00001 <=> C00069 + C00033	KEGG	3.1.1.6	3.1.1.6
R00629	3'-phosphoadenylyl-sulfate:alcohol sulfotransferase	3'-phosphoadenylyl-sulfate:alcohol sulfotransferase	Alcohol + 3'-Phosphoadenylyl sulfate <=> Alkyl sulfate + Adenosine 3',5'-bisphosphate	C00069 + C00053 <=> C02000 + C00054	KEGG	2.8.2.2	2.8.2.2
R00630	Carboxylic-ester hydrolase	Carboxylic-ester hydrolase	Carboxylic ester + H2O <=> Alcohol + Carboxylate	C02391 + C00001 <=> C00069 + C00060	KEGG	3.1.1.1	3.1.1.1
R00631	Aldehyde:NAD+ oxidoreductase	Aldehyde:NAD+ oxidoreductase	Aldehyde + NAD+ + H2O <=> Fatty acid + NADH + H+	C00071 + C00003 + C00001 <=> C00162 + C00004 + C00080	KEGG	1.2.1.3，1.2.1.5	1.2.1.3
R00634	aldehyde:NADP+ oxidoreductase	aldehyde:NADP+ oxidoreductase	Aldehyde + NADP+ + H2O <=> Carboxylate + NADPH + H+	C00071 + C00006 + C00001 <=> C00060 + C00005 + C00080	KEGG	1.2.1.4，1.2.1.5	1.2.1.4
R00635	Aldehyde:oxygen oxidoreductase	Aldehyde:oxygen oxidoreductase	Aldehyde + Oxygen + H2O <=> Carboxylate + Hydrogen peroxide	C00071 + C00007 + C00001 <=> C00060 + C00027	KEGG	1.2.3.1	1.2.3.1
R00636	2-oxo-acid carboxy-lyase (aldehyde-forming)	2-oxo-acid carboxy-lyase (aldehyde-forming)	2-Oxo acid <=> Aldehyde + CO2	C00161 <=> C00071 + C00011	KEGG	4.1.1.1	4.1.1.1
R00637	primary alcohol:oxygen oxidoreductase	primary alcohol:oxygen oxidoreductase	Primary alcohol + Oxygen <=> Aldehyde + Hydrogen peroxide	C00226 + C00007 <=> C00071 + C00027	KEGG	1.1.3.13	1.1.3.13
R00638	aldehyde:acceptor oxidoreductase	aldehyde:acceptor oxidoreductase	Aldehyde + Acceptor + H2O <=> Fatty acid + Reduced acceptor	C00071 + C00028 + C00001 <=> C00162 + C00030	KEGG	1.2.99.3，1.2.99.6，1.2.99.7	1.2.99.3
R00639	primary alcohol:acceptor oxidoreductase	primary alcohol:acceptor oxidoreductase	Primary alcohol + Acceptor <=> Aldehyde + Reduced acceptor	C00226 + C00028 <=> C00071 + C00030	KEGG	1.1.99.20	1.1.99.20
R00640	L-Galactono-1,4-lactone:ferricytochrome-c oxidoreductase	L-Galactono-1,4-lactone:ferricytochrome-c oxidoreductase	L-Galactono-1,4-lactone + 2 Ferricytochrome c <=> Ascorbate + 2 Ferrocytochrome c + 2 H+	C01115 + 2 C00125 <=> C00072 + 2 C00126 + 2 C00080	KEGG	1.3.2.3	1.3.2.3
R00643	L-Galactono-1,4-lactone:oxygen 3-oxidoreductase	L-Galactono-1,4-lactone:oxygen 3-oxidoreductase	L-Galactono-1,4-lactone + Oxygen <=> Ascorbate + Hydrogen peroxide	C01115 + C00007 <=> C00072 + C00027	KEGG	1.3.3.12	1.3.3.12
R00644	L-ascorbate:hydrogen-peroxide oxidoreductase	L-ascorbate:hydrogen-peroxide oxidoreductase	Ascorbate + Hydrogen peroxide <=> Dehydroascorbate + 2 H2O	C00072 + C00027 <=> C05422 + 2 C00001	KEGG	1.11.1.11	1.11.1.11
R00645	ascorbate:acceptor oxidoreductase	ascorbate:acceptor oxidoreductase	2 Ascorbate + Acceptor <=> 2 Monodehydroascorbate + Reduced acceptor	2 C00072 + C00028 <=> 2 C01041 + C00030	KEGG	1.14.-.-	1.14.-.-
R00646	Ascorbate:oxygen 2,3-oxidoreductase (bond-cleaving)	Ascorbate:oxygen 2,3-oxidoreductase (bond-cleaving)	Ascorbate + Oxygen + H2O <=> Threonate + Oxalate	C00072 + C00007 + C00001 <=> C01620 + C00209	KEGG	1.13.11.13	1.13.11.13
R00647	NO NAME	NO NAME	Ascorbate <=> L-xylo-Hexulonolactone	C00072 <=> C03289	KEGG	1.1.3.8	1.1.3.8
R00648	L-Methionine:oxygen oxidoreductase (deaminating)	L-Methionine:oxygen oxidoreductase (deaminating)	L-Methionine + H2O + Oxygen <=> 4-Methylthio-2-oxobutanoic acid + NH3 + Hydrogen peroxide	C00073 + C00001 + C00007 <=> C01180 + C00014 + C00027	KEGG	1.4.3.2	1.4.3.2
R00649	S-Adenosyl-L-methionine:L-methionine S-methyltransferase	S-Adenosyl-L-methionine:L-methionine S-methyltransferase	S-Adenosyl-L-methionine + L-Methionine <=> S-Adenosyl-L-homocysteine + S-Methyl-L-methionine	C00019 + C00073 <=> C00021 + C03172	KEGG	2.1.1.12	2.1.1.12
R00650	S-Adenosyl-L-methionine:L-homocysteine S-methyltransferase	S-Adenosyl-L-methionine:L-homocysteine S-methyltransferase	S-Adenosyl-L-methionine + L-Homocysteine <=> S-Adenosyl-L-homocysteine + L-Methionine	C00019 + C00155 <=> C00021 + C00073	KEGG	2.1.1.10	2.1.1.10
R00651	O-acetyl-L-homoserine:methanethiol 3-amino-3-carboxypropyltransferase; O-Acetyl-L-homoserine acetate-lyase (adding methanethiol)	O-Acetyl-L-homoserine acetate-lyase (adding methanethiol)	O-Acetyl-L-homoserine + Methanethiol <=> L-Methionine + Acetate	C01077 + C00409 <=> C00073 + C00033	KEGG	2.5.1.49	2.5.1.49
R00652	L-Methionine:glyoxylate aminotransferase	L-Methionine:glyoxylate aminotransferase	L-Methionine + Glyoxylate <=> 4-Methylthio-2-oxobutanoic acid + Glycine	C00073 + C00048 <=> C01180 + C00037	KEGG	2.6.1.73	2.6.1.73
R00653	N-Formyl-L-methionine amidohydrolase	N-Formyl-L-methionine amidohydrolase	N-Formyl-L-methionine + H2O <=> Formate + L-Methionine	C03145 + C00001 <=> C00058 + C00073	KEGG	3.5.1.31	3.5.1.31
R00654	L-methionine methanethiol-lyase (deaminating;2-oxobutanoate-forming)	L-methionine methanethiol-lyase (deaminating;2-oxobutanoate-forming)	L-Methionine + H2O <=> Methanethiol + NH3 + 2-Oxobutanoate	C00073 + C00001 <=> C00409 + C00014 + C00109	KEGG	4.4.1.11	4.4.1.11
R00655	methionine racemase	methionine racemase	L-Methionine <=> D-Methionine	C00073 <=> C00855	KEGG	5.1.1.2	5.1.1.2
R00656	L-methionine carboxy-lyase (3-methylthiopropanamine-forming)	L-methionine carboxy-lyase (3-methylthiopropanamine-forming)	L-Methionine <=> 3-Methylthiopropanamine + CO2	C00073 <=> C03354 + C00011	KEGG	4.1.1.57	4.1.1.57
R00657	NO NAME	NO NAME	Aminoacyl-L-methionine + H2O <=> L-Methionine	C05524 + C00001 <=> C00073	KEGG	3.4.13.12	3.4.13.12
R00658	2-phospho-D-glycerate hydro-lyase (phosphoenolpyruvate-forming)	2-phospho-D-glycerate hydro-lyase (phosphoenolpyruvate-forming)	2-Phospho-D-glycerate <=> Phosphoenolpyruvate + H2O	C00631 <=> C00074 + C00001	KEGG	4.2.1.11	4.2.1.11
R00659	UTP:pyruvate 2-O-phosphotransferase	UTP:pyruvate 2-O-phosphotransferase	UTP + Pyruvate <=> UDP + Phosphoenolpyruvate	C00075 + C00022 <=> C00015 + C00074	KEGG	2.7.1.40	2.7.1.40
R00660	Phosphoenolpyruvate:UDP-N-acetyl-D-glucosamine 1-carboxyvinyl-transferase	Phosphoenolpyruvate:UDP-N-acetyl-D-glucosamine 1-carboxyvinyl-transferase	Phosphoenolpyruvate + UDP-N-acetyl-D-glucosamine <=> UDP-N-acetyl-3-(1-carboxyvinyl)-D-glucosamine + Orthophosphate	C00074 + C00043 <=> C04631 + C00009	KEGG	2.5.1.7	2.5.1.7
R00661	phosphoenolpyruvate 2,3-phosphonomutase	phosphoenolpyruvate 2,3-phosphonomutase	Phosphoenolpyruvate <=> 3-Phosphonopyruvate	C00074 <=> C02798	KEGG	5.4.2.9	5.4.2.9
R00662	Uridine triphosphate pyrophosphohydrolase	Uridine triphosphate pyrophosphohydrolase	UTP + H2O <=> UMP + Diphosphate	C00075 + C00001 <=> C00105 + C00013	KEGG	3.6.1.8，3.6.1.19	3.6.1.8
R00664	Bezoyl-CoA:L-ornithine N-benzoyltransferase	Bezoyl-CoA:L-ornithine N-benzoyltransferase	2 S-Benzoate coenzyme A + L-Ornithine <=> 2 CoA + N2,N5-Dibenzoyl-L-ornithine	2 C00512 + C00077 <=> 2 C00010 + C03712	KEGG	2.3.1.127	2.3.1.127
R00665	L-Citrulline N5-carbamoyldihydrolase	L-Citrulline N5-carbamoyldihydrolase	L-Citrulline + H2O <=> L-Ornithine + CO2 + NH3	C00327 + C00001 <=> C00077 + C00011 + C00014	KEGG	3.5.1.20	3.5.1.20
R00666	N5-(L-1-carboxyethyl)-L-ornithine:NADP+ oxidoreductase (L-ornithine-dorming)	N5-(L-1-carboxyethyl)-L-ornithine:NADP+ oxidoreductase (L-ornithine-dorming)	N5-(L-1-Carboxyethyl)-L-ornithine + NADP+ + H2O <=> L-Ornithine + Pyruvate + NADPH + H+	C04210 + C00006 + C00001 <=> C00077 + C00022 + C00005 + C00080	KEGG	1.5.1.24	1.5.1.24
R00667	L-Ornithine:2-oxo-acid aminotransferase	L-Ornithine:2-oxo-acid aminotransferase	L-Ornithine + 2-Oxoglutarate <=> L-Glutamate 5-semialdehyde + L-Glutamate	C00077 + C00026 <=> C01165 + C00025	KEGG	2.6.1.13	2.6.1.13
R00668	L-ornithine:2-oxoglutarate aminotransferase	L-ornithine:2-oxoglutarate aminotransferase	L-Ornithine + 2-Oxoglutarate <=> 3,4-Dihydro-2H-Pyrrole-2-carboxylate + L-Glutamate + H2O	C00077 + C00026 <=> C04322 + C00025 + C00001	KEGG	2.6.1.13，2.6.1.68	2.6.1.13
R00669	N2-Acetyl-L-ornithine amidohydrolase	N2-Acetyl-L-ornithine amidohydrolase	N-Acetylornithine + H2O <=> Acetate + L-Ornithine	C00437 + C00001 <=> C00033 + C00077	KEGG	3.5.1.14，3.5.1.16	3.5.1.14
R00670	L-ornithine carboxy-lyase (putrescine-forming)	L-ornithine carboxy-lyase (putrescine-forming)	L-Ornithine <=> Putrescine + CO2	C00077 <=> C00134 + C00011	KEGG	4.1.1.17	4.1.1.17
R00671	L-ornithine ammonia-lyase (cyclizing; L-proline-forming)	L-ornithine ammonia-lyase (cyclizing; L-proline-forming)	L-Ornithine <=> L-Proline + NH3	C00077 <=> C00148 + C00014	KEGG	4.3.1.12	4.3.1.12
R00672	ornithine racemase	ornithine racemase	L-Ornithine <=> D-Ornithine	C00077 <=> C00515	KEGG	5.1.1.9，5.1.1.10，5.1.1.12	5.1.1.9
R00673	L-tryptophan indole-lyase (deaminating; pyruvate-forming)	L-tryptophan indole-lyase (deaminating; pyruvate-forming)	L-Tryptophan + H2O <=> Indole + Pyruvate + NH3	C00078 + C00001 <=> C00463 + C00022 + C00014	KEGG	4.1.99.1	4.1.99.1
R00674	L-serine hydro-lyase (adding indole; L-tryptophan-forming)	L-serine hydro-lyase (adding indole; L-tryptophan-forming)	L-Serine + Indole <=> L-Tryptophan + H2O	C00065 + C00463 <=> C00078 + C00001	KEGG	4.2.1.20	4.2.1.20
R00675	L-Tryptophan:NAD+ oxidoreductase (deaminating)	L-Tryptophan:NAD+ oxidoreductase (deaminating)	L-Tryptophan + NAD+ + H2O <=> Indolepyruvate + NH3 + NADH + H+	C00078 + C00003 + C00001 <=> C00331 + C00014 + C00004 + C00080	KEGG	1.4.1.19	1.4.1.19
R00676	L-Tryptophan:NADP+ oxidoreductase (deaminating)	L-Tryptophan:NADP+ oxidoreductase (deaminating)	L-Tryptophan + NADP+ + H2O <=> Indolepyruvate + NH3 + NADPH + H+	C00078 + C00006 + C00001 <=> C00331 + C00014 + C00005 + C00080	KEGG	1.4.1.19	1.4.1.19
R00677	L-Tryptophan:oxygen oxidoreductase (deaminating)	L-Tryptophan:oxygen oxidoreductase (deaminating)	L-Tryptophan + H2O + Oxygen <=> Indolepyruvate + NH3 + Hydrogen peroxide	C00078 + C00001 + C00007 <=> C00331 + C00014 + C00027	KEGG	1.4.3.2	1.4.3.2
R00678	L-tryptophan:oxygen 2,3-oxidoreductase (decyclizing)	L-tryptophan:oxygen 2,3-oxidoreductase (decyclizing)	L-Tryptophan + Oxygen <=> L-Formylkynurenine	C00078 + C00007 <=> C02700	KEGG	1.13.11.11，1.13.11.52	1.13.11.11
R00679	L-tryptophan:oxygen 2-oxidoreductase (decarboxylating)	L-tryptophan:oxygen 2-oxidoreductase (decarboxylating)	L-Tryptophan + Oxygen <=> (Indol-3-yl)acetamide + CO2 + H2O	C00078 + C00007 <=> C02693 + C00011 + C00001	KEGG	1.13.12.3	1.13.12.3
R00681	L-Tryptophan:oxygen 2'-oxidoreductase (side-chain-cleaving)	L-Tryptophan:oxygen 2'-oxidoreductase (side-chain-cleaving)	L-Tryptophan + Oxygen <=> (Indol-3-yl)glycolaldehyde + NH3 + CO2	C00078 + C00007 <=> C03230 + C00014 + C00011	KEGG	1.13.99.3	1.13.99.3
R00682	L-Tryptophanamide amidohydrolase	L-Tryptophanamide amidohydrolase	L-Tryptophanamide + H2O <=> L-Tryptophan + NH3	C00977 + C00001 <=> C00078 + C00014	KEGG	3.5.1.57	3.5.1.57
R00683	S-Adenosyl-L-methionine:L-tryptophan N-methyltransferase	S-Adenosyl-L-methionine:L-tryptophan N-methyltransferase	S-Adenosyl-L-methionine + L-Tryptophan <=> S-Adenosyl-L-homocysteine + Abrine	C00019 + C00078 <=> C00021 + C02983	KEGG
R00684	L-Tryptophan:2-oxoglutarate aminotransferase	L-Tryptophan:2-oxoglutarate aminotransferase	L-Tryptophan + 2-Oxoglutarate <=> Indolepyruvate + L-Glutamate	C00078 + C00026 <=> C00331 + C00025	KEGG	2.6.1.27	2.6.1.27
R00685	L-Tryptophan decarboxy-lyase	L-Tryptophan decarboxy-lyase	L-Tryptophan <=> Tryptamine + CO2	C00078 <=> C00398 + C00011	KEGG	4.1.1.28	4.1.1.28
R00686	L-Phenylalanine racemase (ATP-hydrolysing)	L-Phenylalanine racemase (ATP-hydrolysing)	ATP + L-Phenylalanine + H2O <=> AMP + Diphosphate + D-Phenylalanine	C00002 + C00079 + C00001 <=> C00020 + C00013 + C02265	KEGG	5.1.1.11	5.1.1.11
R00687	ATP:L-phenylalanine adenylyltransferase	ATP:L-phenylalanine adenylyltransferase	ATP + L-Phenylalanine <=> Diphosphate + N-Adenylyl-L-phenylalanine	C00002 + C00079 <=> C00013 + C03709	KEGG	2.7.7.54	2.7.7.54
R00688	L-phenylalanine:NAD+ oxidoreductase (deaminating)	L-phenylalanine:NAD+ oxidoreductase (deaminating)	L-Phenylalanine + H2O + NAD+ <=> Phenylpyruvate + NH3 + NADH + H+	C00079 + C00001 + C00003 <=> C00166 + C00014 + C00004 + C00080	KEGG	1.4.1.20	1.4.1.20
R00689	L-Phenylalanine:oxygen oxidoreductase (deaminating)	L-Phenylalanine:oxygen oxidoreductase (deaminating)	L-Phenylalanine + H2O + Oxygen <=> Phenylpyruvate + NH3 + Hydrogen peroxide	C00079 + C00001 + C00007 <=> C00166 + C00014 + C00027	KEGG	1.4.3.2	1.4.3.2
R00690	L-Phenylalanine:oxygen 2-oxidoreductase (decarboxylating)	L-Phenylalanine:oxygen 2-oxidoreductase (decarboxylating)	L-Phenylalanine + Oxygen <=> 2-Phenylacetamide + CO2 + H2O	C00079 + C00007 <=> C02505 + C00011 + C00001	KEGG	1.13.12.9	1.13.12.9
R00691	L-arogenate hydro-lyase (decarboxylating; L-phenylalanine-forming)	L-arogenate hydro-lyase (decarboxylating; L-phenylalanine-forming)	L-Arogenate <=> L-Phenylalanine + H2O + CO2	C00826 <=> C00079 + C00001 + C00011	KEGG	4.2.1.51，4.2.1.91	4.2.1.51
R00692	L-phenylalanine:pyruvate aminotransferase	L-phenylalanine:pyruvate aminotransferase	L-Phenylalanine + Pyruvate <=> Phenylpyruvate + L-Alanine	C00079 + C00022 <=> C00166 + C00041	KEGG	2.6.1.58	2.6.1.58
R00693	Acetyl-CoA:L-phenylalanine N-acetyltransferase	Acetyl-CoA:L-phenylalanine N-acetyltransferase	Acetyl-CoA + L-Phenylalanine <=> CoA + N-Acetyl-L-phenylalanine	C00024 + C00079 <=> C00010 + C03519	KEGG	2.3.1.53	2.3.1.53
R00694	L-Phenylalanine:2-oxoglutarate aminotransferase	L-Phenylalanine:2-oxoglutarate aminotransferase	L-Phenylalanine + 2-Oxoglutarate <=> Phenylpyruvate + L-Glutamate	C00079 + C00026 <=> C00166 + C00025	KEGG	2.6.1.1，2.6.1.5，2.6.1.9，2.6.1.57	2.6.1.1
R00695	L-Aspartate:phenylpyruvate aminotransferase	L-Aspartate:phenylpyruvate aminotransferase	L-Aspartate + Phenylpyruvate <=> Oxaloacetate + L-Phenylalanine	C00049 + C00166 <=> C00036 + C00079	KEGG	2.6.1.70	2.6.1.70
R00697	L-phenylalanine ammonia-lyase (trans-cinnamate-forming)	L-phenylalanine ammonia-lyase (trans-cinnamate-forming)	L-Phenylalanine <=> trans-Cinnamate + NH3	C00079 <=> C00423 + C00014	KEGG	4.3.1.24，4.3.1.25	4.3.1.24
R00698	L-phenylalanine:oxygen oxidoreductase (decarboxylating)	L-phenylalanine:oxygen oxidoreductase (decarboxylating)	L-Phenylalanine + Oxygen <=> 2-Phenylacetamide + CO2	C00079 + C00007 <=> C02505 + C00011	KEGG	1.11.1.7	1.11.1.7
R00699	L-phenylalanine carboxy-lyase (phenylethylamine-forming)	L-phenylalanine carboxy-lyase (phenylethylamine-forming)	L-Phenylalanine <=> Phenethylamine + CO2	C00079 <=> C05332 + C00011	KEGG	4.1.1.28，4.1.1.53	4.1.1.28
R00700	Hydrogen:NAD+ oxidoreductase	Hydrogen:NAD+ oxidoreductase	Hydrogen + NAD+ <=> NADH + H+	C00282 + C00003 <=> C00004 + C00080	KEGG	1.12.1.2	1.12.1.2
R00702	Farnesyl-diphosphate:farnesyl-diphosphate farnesyltransferase	Farnesyl-diphosphate:farnesyl-diphosphate farnesyltransferase	2 trans,trans-Farnesyl diphosphate <=> Diphosphate + Presqualene diphosphate	2 C00448 <=> C00013 + C03428	KEGG	2.5.1.21	2.5.1.21
R00703	(S)-Lactate:NAD+ oxidoreductase	(S)-Lactate:NAD+ oxidoreductase	(S)-Lactate + NAD+ <=> Pyruvate + NADH + H+	C00186 + C00003 <=> C00022 + C00004 + C00080	KEGG	1.1.1.27	1.1.1.27
R00704	(R)-Lactate:NAD+ oxidoreductase	(R)-Lactate:NAD+ oxidoreductase	(R)-Lactate + NAD+ <=> Pyruvate + NADH + H+	C00256 + C00003 <=> C00022 + C00004 + C00080	KEGG	1.1.1.28	1.1.1.28
R00705	3-Oxopropanoate:NAD+ oxidoreductase (decarboxylating, CoA-acetylating)	3-Oxopropanoate:NAD+ oxidoreductase (decarboxylating, CoA-acetylating)	3-Oxopropanoate + CoA + NAD+ <=> Acetyl-CoA + CO2 + NADH + H+	C00222 + C00010 + C00003 <=> C00024 + C00011 + C00004 + C00080	KEGG	1.2.1.18，1.2.1.27	1.2.1.18
R00706	3-Oxopropanoate:NADP+ oxidoreductase (decarboxylating, CoA-acetylating)	3-Oxopropanoate:NADP+ oxidoreductase (decarboxylating, CoA-acetylating)	3-Oxopropanoate + CoA + NADP+ <=> Acetyl-CoA + CO2 + NADPH + H+	C00222 + C00010 + C00006 <=> C00024 + C00011 + C00005 + C00080	KEGG	1.2.1.18	1.2.1.18
R00707	(S)-1-pyrroline-5-carboxylate:NAD+ oxidoreductase	(S)-1-pyrroline-5-carboxylate:NAD+ oxidoreductase	(S)-1-Pyrroline-5-carboxylate + NAD+ + 2 H2O <=> L-Glutamate + NADH + H+	C03912 + C00003 + 2 C00001 <=> C00025 + C00004 + C00080	KEGG	1.5.1.12	1.5.1.12
R00708	(S)-1-pyrroline-5-carboxylate:NADP+ oxidoreductase	(S)-1-pyrroline-5-carboxylate:NADP+ oxidoreductase	(S)-1-Pyrroline-5-carboxylate + NADP+ + 2 H2O <=> L-Glutamate + NADPH + H+	C03912 + C00006 + 2 C00001 <=> C00025 + C00005 + C00080	KEGG	1.5.1.12	1.5.1.12
R00709	Isocitrate:NAD+ oxidoreductase (decarboxylating)	Isocitrate:NAD+ oxidoreductase (decarboxylating)	Isocitrate + NAD+ <=> 2-Oxoglutarate + CO2 + NADH + H+	C00311 + C00003 <=> C00026 + C00011 + C00004 + C00080	KEGG	1.1.1.41，1.1.1.286	1.1.1.41
R00710	Acetaldehyde:NAD+ oxidoreductase	Acetaldehyde:NAD+ oxidoreductase	Acetaldehyde + NAD+ + H2O <=> Acetate + NADH + H+	C00084 + C00003 + C00001 <=> C00033 + C00004 + C00080	KEGG	1.2.1.3，1.2.1.5	1.2.1.3
R00711	Acetaldehyde:NADP+ oxidoreductase	Acetaldehyde:NADP+ oxidoreductase	Acetaldehyde + NADP+ + H2O <=> Acetate + NADPH + H+	C00084 + C00006 + C00001 <=> C00033 + C00005 + C00080	KEGG	1.2.1.4，1.2.1.5	1.2.1.4
R00713	Succinate-semialdehyde:NAD+ oxidoreductase	Succinate-semialdehyde:NAD+ oxidoreductase	Succinate semialdehyde + NAD+ + H2O <=> Succinate + NADH + H+	C00232 + C00003 + C00001 <=> C00042 + C00004 + C00080	KEGG	1.2.1.16，1.2.1.24	1.2.1.16
R00714	Succinate-semialdehyde:NADP+ oxidoreductase	Succinate-semialdehyde:NADP+ oxidoreductase	Succinate semialdehyde + NADP+ + H2O <=> Succinate + NADPH + H+	C00232 + C00006 + C00001 <=> C00042 + C00005 + C00080	KEGG	1.2.1.16	1.2.1.16
R00715	N6-(L-1,3-Dicarboxypropyl)-L-lysine:NAD+ oxidoreductase (L-lysine-forming)	N6-(L-1,3-Dicarboxypropyl)-L-lysine:NAD+ oxidoreductase (L-lysine-forming)	N6-(L-1,3-Dicarboxypropyl)-L-lysine + NAD+ + H2O <=> L-Lysine + 2-Oxoglutarate + NADH + H+	C00449 + C00003 + C00001 <=> C00047 + C00026 + C00004 + C00080	KEGG	1.5.1.7	1.5.1.7
R00716	N6-(L-1,3-Dicarboxypropyl)-L-lysine:NADP+ oxidoreductase (L-lysine-forming)	N6-(L-1,3-Dicarboxypropyl)-L-lysine:NADP+ oxidoreductase (L-lysine-forming)	N6-(L-1,3-Dicarboxypropyl)-L-lysine + NADP+ + H2O <=> L-Lysine + 2-Oxoglutarate + NADPH + H+	C00449 + C00006 + C00001 <=> C00047 + C00026 + C00005 + C00080	KEGG	1.5.1.8	1.5.1.8
R00717	Glycolate:NAD+ oxidoreductase	Glycolate:NAD+ oxidoreductase	Glycolate + NAD+ <=> Glyoxylate + NADH + H+	C00160 + C00003 <=> C00048 + C00004 + C00080	KEGG	1.1.1.26，1.1.1.29	1.1.1.26
R00719	ITP phosphohydrolase	ITP phosphohydrolase	ITP + H2O <=> IDP + Orthophosphate	C00081 + C00001 <=> C00104 + C00009	KEGG	3.6.1.5	3.6.1.5
R00720	Inosine 5'-triphosphate pyrophosphohydrolase	Inosine 5'-triphosphate pyrophosphohydrolase	ITP + H2O <=> IMP + Diphosphate	C00081 + C00001 <=> C00130 + C00013	KEGG	3.6.1.8，3.6.1.19	3.6.1.8
R00722	ATP:IDP phosphotransferase	ATP:IDP phosphotransferase	ATP + IDP <=> ADP + ITP	C00002 + C00104 <=> C00008 + C00081	KEGG	2.7.4.6	2.7.4.6
R00723	Inosine 5'-tetraphosphate phosphohydrolase	Inosine 5'-tetraphosphate phosphohydrolase	Inosine 5'-tetraphosphate + H2O <=> ITP + Orthophosphate	C03614 + C00001 <=> C00081 + C00009	KEGG	3.6.1.14	3.6.1.14
R00724	ITP:pyruvate 2-O-phosphotransferase	ITP:pyruvate 2-O-phosphotransferase	ITP + Pyruvate <=> IDP + Phosphoenolpyruvate	C00081 + C00022 <=> C00104 + C00074	KEGG	2.7.1.40	2.7.1.40
R00725	ITP:D-glucose 6-phosphotransferase	ITP:D-glucose 6-phosphotransferase	ITP + D-Glucose <=> IDP + D-Glucose 6-phosphate	C00081 + C00031 <=> C00104 + C00092	KEGG	2.7.1.1	2.7.1.1
R00726	ITP:oxaloacetate carboxy-lyase (adding ITP; phosphoenolpyruvate-forming); ITP:oxaloacetate carboxy-lyase (transphosphorylating)	ITP:oxaloacetate carboxy-lyase (transphosphorylating)	ITP + Oxaloacetate <=> IDP + Phosphoenolpyruvate + CO2	C00081 + C00036 <=> C00104 + C00074 + C00011	KEGG	4.1.1.32	4.1.1.32
R00727	Succinate:CoA ligase (IDP-forming)	Succinate:CoA ligase (IDP-forming)	ITP + Succinate + CoA <=> IDP + Orthophosphate + Succinyl-CoA	C00081 + C00042 + C00010 <=> C00104 + C00009 + C00091	KEGG	6.2.1.4	6.2.1.4
R00728	L-tyrosine phenol-lyase (deaminating; pyruvate-forming)	L-tyrosine phenol-lyase (deaminating; pyruvate-forming)	L-Tyrosine + H2O <=> Phenol + Pyruvate + NH3	C00082 + C00001 <=> C00146 + C00022 + C00014	KEGG	4.1.99.2	4.1.99.2
R00729	L-Tyrosine:oxygen oxidoreductase (deaminating)	L-Tyrosine:oxygen oxidoreductase (deaminating)	L-Tyrosine + H2O + Oxygen <=> 3-(4-Hydroxyphenyl)pyruvate + NH3 + Hydrogen peroxide	C00082 + C00001 + C00007 <=> C01179 + C00014 + C00027	KEGG	1.4.3.2	1.4.3.2
R00730	L-tyrosine,NADPH:oxygen oxidoreductase (N-hydroxylating)	L-tyrosine,NADPH:oxygen oxidoreductase (N-hydroxylating)	L-Tyrosine + Oxygen + NADPH + H+ <=> N-Hydroxy-L-tyrosine + NADP+ + H2O	C00082 + C00007 + C00005 + C00080 <=> C03004 + C00006 + C00001	KEGG	1.14.13.41	1.14.13.41
R00731	L-Tyrosine:oxygen oxidoreductase	L-Tyrosine:oxygen oxidoreductase	L-Tyrosine + Oxygen <=> 3,4-Dihydroxy-L-phenylalanine + H2O	C00082 + C00007 <=> C00355 + C00001	KEGG	1.14.18.1	1.14.18.1
R00732	L-arogenate:NAD+ oxidoreductase	L-arogenate:NAD+ oxidoreductase	L-Arogenate + NAD+ <=> L-Tyrosine + CO2 + NADH + H+	C00826 + C00003 <=> C00082 + C00011 + C00004 + C00080	KEGG	1.3.1.43，1.3.1.79	1.3.1.43
R00733	L-arogenate:NADP+ oxidoreductase	L-arogenate:NADP+ oxidoreductase	L-Arogenate + NADP+ <=> L-Tyrosine + CO2 + NADPH + H+	C00826 + C00006 <=> C00082 + C00011 + C00005 + C00080	KEGG	1.3.1.78，1.3.1.79	1.3.1.78
R00734	L-tyrosine:2-oxoglutarate aminotransferase	L-tyrosine:2-oxoglutarate aminotransferase	L-Tyrosine + 2-Oxoglutarate <=> 3-(4-Hydroxyphenyl)pyruvate + L-Glutamate	C00082 + C00026 <=> C01179 + C00025	KEGG	2.6.1.1，2.6.1.5，2.6.1.9，2.6.1.57	2.6.1.1
R00735	L-Tyrosine:L-arginine ligase (AMP-forming)	L-Tyrosine:L-arginine ligase (AMP-forming)	ATP + L-Tyrosine + L-Arginine <=> AMP + Diphosphate + Kyotorphin	C00002 + C00082 + C00062 <=> C00020 + C00013 + C02993	KEGG	6.3.2.24	6.3.2.24
R00736	L-tyrosine carboxy-lyase (tyramine-forming)	L-tyrosine carboxy-lyase (tyramine-forming)	L-Tyrosine <=> Tyramine + CO2	C00082 <=> C00483 + C00011	KEGG	4.1.1.25，4.1.1.28	4.1.1.25
R00737	L-tyrosine ammonia-lyase (trans-p-hydroxycinnamate-forming)	L-tyrosine ammonia-lyase (trans-p-hydroxycinnamate-forming)	L-Tyrosine <=> 4-Coumarate + NH3	C00082 <=> C00811 + C00014	KEGG	4.3.1.23，4.3.1.25	4.3.1.23
R00739	L-Tyrosine 2,3-aminomutase	L-Tyrosine 2,3-aminomutase	L-Tyrosine <=> 3-Amino-3-(4-hydroxyphenyl)propanoate	C00082 <=> C04368	KEGG	5.4.3.6	5.4.3.6
R00740	3-Oxopropanoate:NADP+ oxidoreductase (CoA-malonylating)	3-Oxopropanoate:NADP+ oxidoreductase (CoA-malonylating)	3-Oxopropanoate + CoA + NADP+ <=> Malonyl-CoA + NADPH + H+	C00222 + C00010 + C00006 <=> C00083 + C00005 + C00080	KEGG	1.2.1.18，1.2.1.75，1.2.1.-	1.2.1.18
R00742	Acetyl-CoA:carbon-dioxide ligase (ADP-forming)	Acetyl-CoA:carbon-dioxide ligase (ADP-forming)	ATP + Acetyl-CoA + HCO3- <=> ADP + Orthophosphate + Malonyl-CoA	C00002 + C00024 + C00288 <=> C00008 + C00009 + C00083	KEGG	6.4.1.2	6.4.1.2
R00743	Acetyl-CoA:malonate CoA-transferase	Acetyl-CoA:malonate CoA-transferase	Acetyl-CoA + Malonate <=> Acetate + Malonyl-CoA	C00024 + C00383 <=> C00033 + C00083	KEGG	2.8.3.3	2.8.3.3
R00744	3-oxopropionyl-CoA:NAD+ oxidoreductase	3-oxopropionyl-CoA:NAD+ oxidoreductase	Malonyl-CoA + NADPH + H+ <=> 3-Oxopropionyl-CoA + NADP+ + H2O	C00083 + C00005 + C00080 <=> C05989 + C00006 + C00001	KEGG
R00746	Ethanol:NADP+ oxidoreductase	Ethanol:NADP+ oxidoreductase	Ethanol + NADP+ <=> Acetaldehyde + NADPH + H+	C00469 + C00006 <=> C00084 + C00005 + C00080	KEGG	1.1.1.2，1.1.1.71	1.1.1.2
R00747	2-Phosphonoacetaldehyde phosphonohydrolase	2-Phosphonoacetaldehyde phosphonohydrolase	Phosphonoacetaldehyde + H2O <=> Acetaldehyde + Orthophosphate	C03167 + C00001 <=> C00084 + C00009	KEGG	3.11.1.1	3.11.1.1
R00748	ethanolamine-phosphate phosphate-lyase (deaminating; acetaldehyde-forming)	ethanolamine-phosphate phosphate-lyase (deaminating; acetaldehyde-forming)	Ethanolamine phosphate + H2O <=> Acetaldehyde + NH3 + Orthophosphate	C00346 + C00001 <=> C00084 + C00014 + C00009	KEGG	4.2.3.2	4.2.3.2
R00749	ethanolamine ammonia-lyase (acetaldehyde-forming)	ethanolamine ammonia-lyase (acetaldehyde-forming)	Ethanolamine <=> Acetaldehyde + NH3	C00189 <=> C00084 + C00014	KEGG	4.3.1.7	4.3.1.7
R00750	4-hydroxy-2-oxopentanoate pyruvate-lyase (acetaldehyde-forming)	4-hydroxy-2-oxopentanoate pyruvate-lyase (acetaldehyde-forming)	Acetaldehyde + Pyruvate <=> 4-Hydroxy-2-oxopentanoate	C00084 + C00022 <=> C03589	KEGG	4.1.3.39	4.1.3.39
R00751	L-threonine acetaldehyde-lyase (glycine-forming)	L-threonine acetaldehyde-lyase (glycine-forming)	L-Threonine <=> Glycine + Acetaldehyde	C00188 <=> C00037 + C00084	KEGG	4.1.2.5	4.1.2.5
R00753	(S)-lactate acetaldehyde-lyase (formate-forming)	(S)-lactate acetaldehyde-lyase (formate-forming)	(S)-Lactate <=> Formate + Acetaldehyde	C00186 <=> C00058 + C00084	KEGG	4.1.2.36	4.1.2.36
R00754	ethanol:NAD+ oxidoreductase	ethanol:NAD+ oxidoreductase	Ethanol + NAD+ <=> Acetaldehyde + NADH + H+	C00469 + C00003 <=> C00084 + C00004 + C00080	KEGG	1.1.1.1，1.1.1.71	1.1.1.1
R00755	NO NAME	NO NAME	Acetaldehyde + Thiamin diphosphate <=> 2-(alpha-Hydroxyethyl)thiamine diphosphate	C00084 + C00068 <=> C05125	KEGG	4.1.1.1	4.1.1.1
R00756	ATP:D-fructose-6-phosphate 1-phosphotransferase	ATP:D-fructose-6-phosphate 1-phosphotransferase	ATP + D-Fructose 6-phosphate <=> ADP + D-Fructose 1,6-bisphosphate	C00002 + C00085 <=> C00008 + C00354	KEGG	2.7.1.11	2.7.1.11
R00758	D-Mannitol-1-phosphate:NAD+ 5-oxidoreductase	D-Mannitol-1-phosphate:NAD+ 5-oxidoreductase	D-Mannitol 1-phosphate + NAD+ <=> D-Fructose 6-phosphate + NADH + H+	C00644 + C00003 <=> C00085 + C00004 + C00080	KEGG	1.1.1.17	1.1.1.17
R00760	ATP:D-fructose 6-phosphotransferase	ATP:D-fructose 6-phosphotransferase	ATP + D-Fructose <=> ADP + D-Fructose 6-phosphate	C00002 + C00095 <=> C00008 + C00085	KEGG	2.7.1.1，2.7.1.4	2.7.1.1
R00761	D-fructose-6-phosphate D-erythrose-4-phosphate-lyase (adding phosphate; acetyl-phosphate-forming)	D-fructose-6-phosphate D-erythrose-4-phosphate-lyase (adding phosphate; acetyl-phosphate-forming)	D-Fructose 6-phosphate + Orthophosphate <=> Acetyl phosphate + D-Erythrose 4-phosphate + H2O	C00085 + C00009 <=> C00227 + C00279 + C00001	KEGG	4.1.2.22	4.1.2.22
R00762	D-Fructose-1,6-bisphosphate 1-phosphohydrolase	D-Fructose-1,6-bisphosphate 1-phosphohydrolase	D-Fructose 1,6-bisphosphate + H2O <=> D-Fructose 6-phosphate + Orthophosphate	C00354 + C00001 <=> C00085 + C00009	KEGG	3.1.3.11	3.1.3.11
R00763	beta-D-fructose-2,6-bisphosphate 2-phosphohydrolase	beta-D-fructose-2,6-bisphosphate 2-phosphohydrolase	beta-D-Fructose 2,6-bisphosphate + H2O <=> D-Fructose 6-phosphate + Orthophosphate	C00665 + C00001 <=> C00085 + C00009	KEGG	3.1.3.46	3.1.3.46
R00764	diphosphate:D-fructose-6-phosphate 1-phosphotransferase	diphosphate:D-fructose-6-phosphate 1-phosphotransferase	Diphosphate + D-Fructose 6-phosphate <=> Orthophosphate + D-Fructose 1,6-bisphosphate	C00013 + C00085 <=> C00009 + C00354	KEGG	2.7.1.90	2.7.1.90
R00765	D-glucosamine-6-phosphate aminohydrolase (ketol isomerizing); D-glucosamine-6-phosphate ketol-isomerase(deaminating)	D-glucosamine-6-phosphate aminohydrolase (ketol isomerizing)	D-Glucosamine 6-phosphate + H2O <=> D-Fructose 6-phosphate + NH3	C00352 + C00001 <=> C00085 + C00014	KEGG	3.5.99.6	3.5.99.6
R00766	UDP-glucose:D-fructose-6-phosphate 2-alpha-D-glucosyltransferase	UDP-glucose:D-fructose-6-phosphate 2-alpha-D-glucosyltransferase	UDP-glucose + D-Fructose 6-phosphate <=> UDP + Sucrose 6'-phosphate	C00029 + C00085 <=> C00015 + C02591	KEGG	2.4.1.14	2.4.1.14
R00767	CTP:D-fructose-6-phosphate 1-phosphotransferase	CTP:D-fructose-6-phosphate 1-phosphotransferase	CTP + D-Fructose 6-phosphate <=> CDP + D-Fructose 1,6-bisphosphate	C00063 + C00085 <=> C00112 + C00354	KEGG	2.7.1.11	2.7.1.11
R00768	L-glutamine:D-fructose-6-phosphate isomerase (deaminating); L-glutamine:D-fructose-6-phosphate aminotransferase (hexose isomerizing)	L-glutamine:D-fructose-6-phosphate isomerase (deaminating)	L-Glutamine + D-Fructose 6-phosphate <=> L-Glutamate + D-Glucosamine 6-phosphate	C00064 + C00085 <=> C00025 + C00352	KEGG	2.6.1.16	2.6.1.16
R00769	UTP:D-fructose-6-phosphate 1-phosphotransferase	UTP:D-fructose-6-phosphate 1-phosphotransferase	UTP + D-Fructose 6-phosphate <=> UDP + D-Fructose 1,6-bisphosphate	C00075 + C00085 <=> C00015 + C00354	KEGG	2.7.1.11	2.7.1.11
R00770	ITP:D-fructose-6-phosphate 1-phosphotransferase	ITP:D-fructose-6-phosphate 1-phosphotransferase	ITP + D-Fructose 6-phosphate <=> IDP + D-Fructose 1,6-bisphosphate	C00081 + C00085 <=> C00104 + C00354	KEGG	2.7.1.11	2.7.1.11
R00771	D-glucose-6-phosphate aldose-ketose-isomerase	D-glucose-6-phosphate aldose-ketose-isomerase	D-Glucose 6-phosphate <=> D-Fructose 6-phosphate	C00092 <=> C00085	KEGG	5.3.1.9	5.3.1.9
R00772	D-mannose-6-phosphate aldose-ketose-isomerase	D-mannose-6-phosphate aldose-ketose-isomerase	D-Mannose 6-phosphate <=> D-Fructose 6-phosphate	C00275 <=> C00085	KEGG	5.3.1.8	5.3.1.8
R00774	Urea:carbon-dioxide ligase (ADP-forming)	Urea:carbon-dioxide ligase (ADP-forming)	ATP + Urea + HCO3- <=> ADP + Orthophosphate + Urea-1-carboxylate	C00002 + C00086 + C00288 <=> C00008 + C00009 + C01010	KEGG	6.3.4.6	6.3.4.6
R00775	Guanidinoacetate amidohydrolase	Guanidinoacetate amidohydrolase	Guanidinoacetate + H2O <=> Glycine + Urea	C00581 + C00001 <=> C00037 + C00086	KEGG	3.5.3.2	3.5.3.2
R00776	(S)-ureidoglycolate urea-lyase (glyoxylate-forming)	(S)-ureidoglycolate urea-lyase (glyoxylate-forming)	(-)-Ureidoglycolate <=> Glyoxylate + Urea	C00603 <=> C00048 + C00086	KEGG	4.3.2.3	4.3.2.3
R00777	N-Amidino-L-aspartate amidinohydrolase	N-Amidino-L-aspartate amidinohydrolase	N-Amidino-L-aspartate + H2O <=> L-Aspartate + Urea	C03139 + C00001 <=> C00049 + C00086	KEGG	3.5.3.14	3.5.3.14
R00778	urea hydro-lyase (cyanamide-forming)	urea hydro-lyase (cyanamide-forming)	Urea <=> Cyanamide + H2O	C00086 <=> C01566 + C00001	KEGG	4.2.1.69	4.2.1.69
R00781	Sulfur:oxygen oxidoreductase	Sulfur:oxygen oxidoreductase	Sulfur + Oxygen + H2O <=> Sulfite	C00087 + C00007 + C00001 <=> C00094	KEGG	1.13.11.18	1.13.11.18
R00782	L-Cysteine hydrogen-sulfide-lyase (deaminating; pyruvate-forming)	L-Cysteine hydrogen-sulfide-lyase (deaminating; pyruvate-forming)	L-Cysteine + H2O <=> Hydrogen sulfide + Pyruvate + NH3	C00097 + C00001 <=> C00283 + C00022 + C00014	KEGG	4.4.1.1，4.4.1.8	4.4.1.1
R00783	nitric-oxide:ferricytochrome-c oxidoreductase	nitric-oxide:ferricytochrome-c oxidoreductase	Nitric oxide + H2O + Ferricytochrome c <=> Nitrite + Ferrocytochrome c + H+	C00533 + C00001 + C00125 <=> C00088 + C00126 + C00080	KEGG	1.7.2.1	1.7.2.1
R00784	nitric-oxide:ferricytochrome-c2 oxidoreductase	nitric-oxide:ferricytochrome-c2 oxidoreductase	Nitric oxide + H2O + Ferricytochrome c2 <=> Nitrite + Ferrocytochrome c2 + H+	C00533 + C00001 + C00997 <=> C00088 + C01000 + C00080	KEGG	1.7.2.1	1.7.2.1
R00785	nitric-oxide:oxidized azurin oxidoreductase	nitric-oxide:oxidized azurin oxidoreductase	Nitric oxide + H2O + Oxidized azurin <=> Nitrite + Reduced azurin + H+	C00533 + C00001 + C05357 <=> C00088 + C05358 + C00080	KEGG	1.7.2.1	1.7.2.1
R00787	ammonium-hydroxide:NADP+ oxidoreductase	ammonium-hydroxide:NADP+ oxidoreductase	NH4OH + 3 NAD+ + H2O <=> Nitrite + 3 NADH + 3 H+	C01358 + 3 C00003 + C00001 <=> C00088 + 3 C00004 + 3 C00080	KEGG	1.7.1.4	1.7.1.4
R00789	ammonium-hydroxide:NAD(P)+ oxidoreductase	ammonium-hydroxide:NAD(P)+ oxidoreductase	NH4OH + 3 NADP+ + H2O <=> Nitrite + 3 NADPH + 3 H+	C01358 + 3 C00006 + C00001 <=> C00088 + 3 C00005 + 3 C00080	KEGG	1.7.1.4	1.7.1.4
R00790	Ammonia:ferredoxin oxidoreductase	Ammonia:ferredoxin oxidoreductase	NH3 + 2 H2O + 6 Oxidized ferredoxin <=> Nitrite + 6 Reduced ferredoxin + 6 H+	C00014 + 2 C00001 + 6 C00139 <=> C00088 + 6 C00138 + 6 C00080	KEGG	1.7.7.1	1.7.7.1
R00791	nitrite:ferredoxin oxidoreductase	nitrite:ferredoxin oxidoreductase	Nitrite + H2O + 2 Oxidized ferredoxin <=> Nitrate + 2 Reduced ferredoxin	C00088 + C00001 + 2 C00139 <=> C00244 + 2 C00138	KEGG	1.7.7.2	1.7.7.2
R00792	ferrocytochrome-b:nitrate oxidoreductase	ferrocytochrome-b:nitrate oxidoreductase	Nitrate + 2 Ferrocytochrome b <=> Nitrite + H2O + 2 Ferricytochrome b	C00244 + 2 C06259 <=> C00088 + C00001 + 2 C06260	KEGG	1.9.6.1	1.9.6.1
R00793	Hydroxylamine:oxygen oxidoreductase	Hydroxylamine:oxygen oxidoreductase	Nitrite + H2O <=> Hydroxylamine + Oxygen	C00088 + C00001 <=> C00192 + C00007	KEGG	1.7.3.4	1.7.3.4
R00794	nitrite:NAD+ oxidoreductase; NADH:nitrate oxidoreductase	nitrite:NAD+ oxidoreductase;	Nitrite + NAD+ + H2O <=> Nitrate + NADH + H+	C00088 + C00003 + C00001 <=> C00244 + C00004 + C00080	KEGG	1.7.1.1，1.7.1.2	1.7.1.1
R00796	nitrite:NADP+ oxidoreductase; NADPH:nitrate oxidoreductase	nitrite:NADP+ oxidoreductase;	Nitrite + NADP+ + H2O <=> Nitrate + NADPH + H+	C00088 + C00006 + C00001 <=> C00244 + C00005 + C00080	KEGG	1.7.1.2，1.7.1.3	1.7.1.2
R00798	nitrite:acceptor oxidoreductase	nitrite:acceptor oxidoreductase	Nitrite + Acceptor + H2O <=> Nitrate + Reduced acceptor	C00088 + C00028 + C00001 <=> C00244 + C00030	KEGG	1.7.99.4	1.7.99.4
R00799	Nitroethane:oxygen oxidoreductase	Nitroethane:oxygen oxidoreductase	Nitrite + Acetaldehyde + Hydrogen peroxide <=> Nitroethane + Oxygen + H2O	C00088 + C00084 + C00027 <=> C01837 + C00007 + C00001	KEGG	1.7.3.1	1.7.3.1
R00800	nitrite oxidase	nitrite oxidase	2 Nitrite + Oxygen <=> 2 Nitrate	2 C00088 + C00007 <=> 2 C00244	KEGG
R00801	sucrose glucohydrolase	sucrose glucohydrolase	Sucrose + H2O <=> D-Fructose + D-Glucose	C00089 + C00001 <=> C00095 + C00031	KEGG	3.2.1.20，3.2.1.48	3.2.1.20
R00802	sucrose alpha-glucohydrolase	sucrose alpha-glucohydrolase	Sucrose + H2O <=> beta-D-Fructose + alpha-D-Glucose	C00089 + C00001 <=> C02336 + C00267	KEGG	3.2.1.20，3.2.1.26，3.2.1.48	3.2.1.20
R00803	sucrose:phosphate alpha-D-glucosyltransferase	sucrose:phosphate alpha-D-glucosyltransferase	Sucrose + Orthophosphate <=> D-Fructose + D-Glucose 1-phosphate	C00089 + C00009 <=> C00095 + C00103	KEGG	2.4.1.7	2.4.1.7
R00804	Sugar-phosphate phosphohydrolase	Sugar-phosphate phosphohydrolase	Sugar phosphate + H2O <=> Sugar + Orthophosphate	C00934 + C00001 <=> C11477 + C00009	KEGG	3.1.3.23	3.1.3.23
R00805	sucrose-6F-phosphate phosphohydrolase	sucrose-6F-phosphate phosphohydrolase	Sucrose 6'-phosphate + H2O <=> Sucrose + Orthophosphate	C02591 + C00001 <=> C00089 + C00009	KEGG	3.1.3.24	3.1.3.24
R00806	UDP-glucose:D-fructose 2-alpha-D-glucosyltransferase	UDP-glucose:D-fructose 2-alpha-D-glucosyltransferase	UDP-glucose + D-Fructose <=> UDP + Sucrose	C00029 + C00095 <=> C00015 + C00089	KEGG	2.4.1.13	2.4.1.13
R00807	Sucrose:(acceptor) 3-oxidoreductase	Sucrose:(acceptor) 3-oxidoreductase	Sucrose + FAD <=> 3-Ketosucrose + FADH2	C00089 + C00016 <=> C05731 + C01352	KEGG	1.1.99.13	1.1.99.13
R00808	Sucrose:(acceptor) 3-oxidoreductase	Sucrose:(acceptor) 3-oxidoreductase	Sucrose + Acceptor <=> 3-Ketosucrose + Reduced acceptor	C00089 + C00028 <=> C05731 + C00030	KEGG	1.1.99.13	1.1.99.13
R00809	UDP-galactose:sucrose 6F-alpha-D-galactosyltransferase	UDP-galactose:sucrose 6F-alpha-D-galactosyltransferase	UDP-D-galactose + Sucrose <=> UDP + 6F-alpha-D-Galactosylsucrose	C00052 + C00089 <=> C00015 + C03848	KEGG	2.4.1.167	2.4.1.167
R00810	Sucrose glucosylmutase	Sucrose glucosylmutase	Sucrose <=> Palatinose	C00089 <=> C01742	KEGG	5.4.99.11	5.4.99.11
R00811	protein-Npi-phospho-L-histidine:sugar phosphotransferase	protein-Npi-phospho-L-histidine:sugar phosphotransferase	Sucrose + Protein N(pi)-phospho-L-histidine <=> Sucrose 6-phosphate + Protein histidine	C00089 + C04261 <=> C16688 + C00615	KEGG	2.7.1.69	2.7.1.69
R00812	cis-1,2-dihydrobenzene-1,2-diol:NAD+ oxidoreductase	cis-1,2-dihydrobenzene-1,2-diol:NAD+ oxidoreductase	cis-1,2-Dihydrobenzene-1,2-diol + NAD+ <=> Catechol + NADH + H+	C04091 + C00003 <=> C00090 + C00004 + C00080	KEGG	1.3.1.19	1.3.1.19
R00813	(1R,6S)-1,6-dihydroxycyclohexa-2,4-diene-1-carboxylate:NAD+ oxidoreductase (decarboxylating)	(1R,6S)-1,6-dihydroxycyclohexa-2,4-diene-1-carboxylate:NAD+ oxidoreductase (decarboxylating)	(1R,6S)-1,6-Dihydroxycyclohexa-2,4-diene-1-carboxylate + NAD+ <=> Catechol + NADH + CO2 + H+	C06321 + C00003 <=> C00090 + C00004 + C00011 + C00080	KEGG	1.3.1.25	1.3.1.25
R00814	trans-1,2-dihydrobenzene-1,2-diol:NADP+ oxidoreductase	trans-1,2-dihydrobenzene-1,2-diol:NADP+ oxidoreductase	trans-1,2-Dihydrobenzene-1,2-diol + NADP+ <=> Catechol + NADPH + H+	C04221 + C00006 <=> C00090 + C00005 + C00080	KEGG	1.3.1.20	1.3.1.20
R00815	phenol,NADPH:oxogen oxidoreductase (2-hydroxylating)	phenol,NADPH:oxogen oxidoreductase (2-hydroxylating)	Phenol + Oxygen + NADPH + H+ <=> Catechol + NADP+ + H2O	C00146 + C00007 + C00005 + C00080 <=> C00090 + C00006 + C00001	KEGG	1.14.13.7	1.14.13.7
R00816	Catechol:oxygen 2,3-oxidoreductase (decyclizing)	Catechol:oxygen 2,3-oxidoreductase (decyclizing)	Catechol + Oxygen <=> 2-Hydroxymuconate semialdehyde	C00090 + C00007 <=> C00682	KEGG	1.13.11.2	1.13.11.2
R00817	Catechol:oxygen 1,2-oxidoreductase(decyclizing)	Catechol:oxygen 1,2-oxidoreductase(decyclizing)	Catechol + Oxygen <=> cis,cis-Muconate	C00090 + C00007 <=> C02480	KEGG	1.13.11.1	1.13.11.1
R00818	salicylate,NADH:oxygen oxidoreductase (1-hydroxylating, decarboxylating)	salicylate,NADH:oxygen oxidoreductase (1-hydroxylating, decarboxylating)	Salicylate + Oxygen + NADH + H+ <=> Catechol + CO2 + NAD+ + H2O	C00805 + C00007 + C00004 + C00080 <=> C00090 + C00011 + C00003 + C00001	KEGG	1.14.13.1	1.14.13.1
R00821	2,3-dihydroxybenzoate carboxy-lyase	2,3-dihydroxybenzoate carboxy-lyase	2,3-Dihydroxybenzoate <=> Catechol + CO2	C00196 <=> C00090 + C00011	KEGG	4.1.1.46	4.1.1.46
R00822	3,4-dihydroxybenzoate carboxy-lyase (catechol-forming); Protocatechuate carboxy-lyase	Protocatechuate carboxy-lyase	3,4-Dihydroxybenzoate <=> Catechol + CO2	C00230 <=> C00090 + C00011	KEGG	4.1.1.63	4.1.1.63
R00823	Anthranilate,NADH:oxygen oxidoreductase (1,2-hydroxylating, deaminating, decarboxylating)	Anthranilate,NADH:oxygen oxidoreductase (1,2-hydroxylating, deaminating, decarboxylating)	Anthranilate + Oxygen + NADH + H+ <=> Catechol + NH3 + CO2 + NAD+	C00108 + C00007 + C00004 + C00080 <=> C00090 + C00014 + C00011 + C00003	KEGG	1.14.12.1	1.14.12.1
R00825	Anthranilate,NADPH:oxygen oxidoreductase (1,2-hydroxylating, deaminating, decarboxylating)	Anthranilate,NADPH:oxygen oxidoreductase (1,2-hydroxylating, deaminating, decarboxylating)	Anthranilate + Oxygen + NADPH + H+ <=> Catechol + NH3 + CO2 + NADP+	C00108 + C00007 + C00005 + C00080 <=> C00090 + C00014 + C00011 + C00006	KEGG	1.14.12.1	1.14.12.1
R00827	S-Adenosyl-L-methionine:catechol O-methyltransferase	S-Adenosyl-L-methionine:catechol O-methyltransferase	S-Adenosyl-L-methionine + Catechol <=> S-Adenosyl-L-homocysteine + o-Methoxyphenol	C00019 + C00090 <=> C00021 + C01502	KEGG	2.1.1.6	2.1.1.6
R00828	2-nitrophenol,NADPH:oxygen 2-oxidoreductase (2-hydroxylating, nitrite-forming)	2-nitrophenol,NADPH:oxygen 2-oxidoreductase (2-hydroxylating, nitrite-forming)	2-Nitrophenol + Oxygen + 2 NADPH + 2 H+ <=> Catechol + Nitrite + 2 NADP+ + H2O	C01988 + C00007 + 2 C00005 + 2 C00080 <=> C00090 + C00088 + 2 C00006 + C00001	KEGG	1.14.13.31	1.14.13.31
R00829	Succinyl-CoA:acetyl-CoA C-acyltransferase; beta-ketoadipyl-CoA thiolase	beta-ketoadipyl-CoA thiolase	Succinyl-CoA + Acetyl-CoA <=> CoA + 3-Oxoadipyl-CoA	C00091 + C00024 <=> C00010 + C02232	KEGG	2.3.1.16，2.3.1.174	2.3.1.16
R00830	succinyl-CoA:glycine C-succinyltransferase (decarboxylating)	succinyl-CoA:glycine C-succinyltransferase (decarboxylating)	Succinyl-CoA + Glycine <=> 5-Aminolevulinate + CoA + CO2	C00091 + C00037 <=> C00430 + C00010 + C00011	KEGG	2.3.1.37	2.3.1.37
R00832	succinyl-CoA:L-arginine N2-succinyltransferase	succinyl-CoA:L-arginine N2-succinyltransferase	Succinyl-CoA + L-Arginine <=> CoA + N2-Succinyl-L-arginine	C00091 + C00062 <=> C00010 + C03296	KEGG	2.3.1.109	2.3.1.109
R00833	(R)-Methylmalonyl-CoA CoA-carbonylmutase	(R)-Methylmalonyl-CoA CoA-carbonylmutase	(R)-Methylmalonyl-CoA <=> Succinyl-CoA	C01213 <=> C00091	KEGG	5.4.99.2	5.4.99.2
R00834	D-Sorbitol 6-phosphate:NADP+ 1-oxidoreductase	D-Sorbitol 6-phosphate:NADP+ 1-oxidoreductase	Sorbitol 6-phosphate + NADP+ <=> D-Glucose 6-phosphate + NADPH + H+	C01096 + C00006 <=> C00092 + C00005 + C00080	KEGG	1.1.1.200	1.1.1.200
R00835	D-glucose-6-phosphate:NADP+ 1-oxidoreductase	D-glucose-6-phosphate:NADP+ 1-oxidoreductase	D-Glucose 6-phosphate + NADP+ <=> D-Glucono-1,5-lactone 6-phosphate + NADPH + H+	C00092 + C00006 <=> C01236 + C00005 + C00080	KEGG	1.1.1.49	1.1.1.49
R00836	UDP-glucose:D-glucose-6-phosphate 1-alpha-D-glucosyltransferase	UDP-glucose:D-glucose-6-phosphate 1-alpha-D-glucosyltransferase	UDP-glucose + D-Glucose 6-phosphate <=> UDP + alpha,alpha'-Trehalose 6-phosphate	C00029 + C00092 <=> C00015 + C00689	KEGG	2.4.1.15	2.4.1.15
R00837	alpha,alpha-Trehalose-6-phosphate phosphoglucohydrolase	alpha,alpha-Trehalose-6-phosphate phosphoglucohydrolase	H2O + alpha,alpha'-Trehalose 6-phosphate <=> D-Glucose + D-Glucose 6-phosphate	C00001 + C00689 <=> C00031 + C00092	KEGG	3.2.1.93，3.2.1.122	3.2.1.93
R00838	Maltose-6'-phosphate 6-phosphoglucohydrolase	Maltose-6'-phosphate 6-phosphoglucohydrolase	H2O + Maltose 6'-phosphate <=> D-Glucose + D-Glucose 6-phosphate	C00001 + C02995 <=> C00031 + C00092	KEGG	3.2.1.122	3.2.1.122
R00839	6-phospho-beta-D-glucosyl-(1->4)-D-glucose 6-phosphoglucohydrolase	6-phospho-beta-D-glucosyl-(1->4)-D-glucose 6-phosphoglucohydrolase	6-Phospho-beta-D-glucosyl-(1,4)-D-glucose + H2O <=> D-Glucose + D-Glucose 6-phosphate	C04534 + C00001 <=> C00031 + C00092	KEGG	3.2.1.86	3.2.1.86
R00841	sn-glycerol-3-phosphate phosphohydrolase	sn-glycerol-3-phosphate phosphohydrolase	sn-Glycerol 3-phosphate + H2O <=> Glycerol + Orthophosphate	C00093 + C00001 <=> C00116 + C00009	KEGG	3.1.3.21	3.1.3.21
R00842	sn-Glycerol-3-phosphate:NAD+ 2-oxidoreductase	sn-Glycerol-3-phosphate:NAD+ 2-oxidoreductase	sn-Glycerol 3-phosphate + NAD+ <=> Glycerone phosphate + NADH + H+	C00093 + C00003 <=> C00111 + C00004 + C00080	KEGG	1.1.1.8，1.1.1.94	1.1.1.8
R00844	sn-Glycerol-3-phosphate:NADP+ 2-oxidoreductase	sn-Glycerol-3-phosphate:NADP+ 2-oxidoreductase	sn-Glycerol 3-phosphate + NADP+ <=> Glycerone phosphate + NADPH + H+	C00093 + C00006 <=> C00111 + C00005 + C00080	KEGG	1.1.1.94	1.1.1.94
R00845	sn-glycerol-3-phosphate:NADP+ 1-oxidoreductase	sn-glycerol-3-phosphate:NADP+ 1-oxidoreductase	sn-Glycerol 3-phosphate + NADP+ <=> D-Glyceraldehyde 3-phosphate + NADPH + H+	C00093 + C00006 <=> C00118 + C00005 + C00080	KEGG	1.1.1.177	1.1.1.177
R00846	sn-Glycerol-3-phosphate:oxygen 2-oxidoreductase	sn-Glycerol-3-phosphate:oxygen 2-oxidoreductase	sn-Glycerol 3-phosphate + Oxygen <=> Glycerone phosphate + Hydrogen peroxide	C00093 + C00007 <=> C00111 + C00027	KEGG	1.1.3.21	1.1.3.21
R00847	ATP:glycerol 3-phosphotransferase	ATP:glycerol 3-phosphotransferase	ATP + Glycerol <=> ADP + sn-Glycerol 3-phosphate	C00002 + C00116 <=> C00008 + C00093	KEGG	2.7.1.30	2.7.1.30
R00848	sn-Glycerol-3-phosphate:(acceptor) 2-oxidoreductase	sn-Glycerol-3-phosphate:(acceptor) 2-oxidoreductase	sn-Glycerol 3-phosphate + FAD <=> Glycerone phosphate + FADH2	C00093 + C00016 <=> C00111 + C01352	KEGG	1.1.5.3	1.1.5.3
R00849	sn-glycerol 3-phosphate:quinone oxidoreductase	sn-glycerol 3-phosphate:quinone oxidoreductase	sn-Glycerol 3-phosphate + Quinone <=> Glycerone phosphate + Hydroquinone	C00093 + C15602 <=> C00111 + C15603	KEGG	1.1.5.3	1.1.5.3
R00850	sn-Glycerol-3-phosphate:D-glucose 6-phosphotransferase	sn-Glycerol-3-phosphate:D-glucose 6-phosphotransferase	sn-Glycerol 3-phosphate + D-Glucose <=> Glycerol + D-Glucose 6-phosphate	C00093 + C00031 <=> C00116 + C00092	KEGG	2.7.1.142	2.7.1.142
R00851	acyl-CoA:sn-glycerol-3-phosphate 1-O-acyltransferase	acyl-CoA:sn-glycerol-3-phosphate 1-O-acyltransferase	sn-Glycerol 3-phosphate + Acyl-CoA <=> 1-Acyl-sn-glycerol 3-phosphate + CoA	C00093 + C00040 <=> C00681 + C00010	KEGG	2.3.1.15	2.3.1.15
R00853	UDP-galactose:sn-glycerol-3-phosphate 2-alpha-D-galactosyltransferase	UDP-galactose:sn-glycerol-3-phosphate 2-alpha-D-galactosyltransferase	UDP-D-galactose + sn-Glycerol 3-phosphate <=> UDP + 2-(alpha-D-Galactosyl)-sn-glycerol 3-phosphate	C00052 + C00093 <=> C00015 + C04641	KEGG	2.4.1.137	2.4.1.137
R00854	UDP-galactose:sn-glycerol-3-phosphate 1-alpha-D-galactosyltransferase	UDP-galactose:sn-glycerol-3-phosphate 1-alpha-D-galactosyltransferase	UDP-D-galactose + sn-Glycerol 3-phosphate <=> UDP + alpha-D-Galactosyl-(1,1')-sn-glycerol 3-phosphate	C00052 + C00093 <=> C00015 + C04703	KEGG	2.4.1.96	2.4.1.96
R00855	CDPglycerol phosphoglycerohydrolase	CDPglycerol phosphoglycerohydrolase	CDP-glycerol + H2O <=> CMP + sn-Glycerol 3-phosphate	C00513 + C00001 <=> C00055 + C00093	KEGG	3.6.1.16	3.6.1.16
R00856	CTP:sn-glycerol-3-phosphate cytidylyltransferase	CTP:sn-glycerol-3-phosphate cytidylyltransferase	CTP + sn-Glycerol 3-phosphate <=> Diphosphate + CDP-glycerol	C00063 + C00093 <=> C00013 + C00513	KEGG	2.7.7.39	2.7.7.39
R00857	Glycerophosphodiester glycerophosphohydrolase	Glycerophosphodiester glycerophosphohydrolase	Glycerophosphodiester + H2O <=> Alcohol + sn-Glycerol 3-phosphate	C03120 + C00001 <=> C00069 + C00093	KEGG	3.1.4.46	3.1.4.46
R00858	hydrogen-sulfide:NADP+ oxidoreductase	hydrogen-sulfide:NADP+ oxidoreductase	Hydrogen sulfide + 3 NADP+ + 3 H2O <=> Sulfite + 3 NADPH + 3 H+	C00283 + 3 C00006 + 3 C00001 <=> C00094 + 3 C00005 + 3 C00080	KEGG	1.8.1.2	1.8.1.2
R00859	Hydrogen-sulfide:ferredoxin oxidoreductase	Hydrogen-sulfide:ferredoxin oxidoreductase	Hydrogen sulfide + 6 Oxidized ferredoxin + 3 H2O <=> Sulfite + 6 Reduced ferredoxin + 6 H+	C00283 + 6 C00139 + 3 C00001 <=> C00094 + 6 C00138 + 6 C00080	KEGG	1.8.7.1	1.8.7.1
R00860	AMP,sulfite:acceptor oxidoreductase (adenosine-5'-phosphosulfate-forming)	AMP,sulfite:acceptor oxidoreductase (adenosine-5'-phosphosulfate-forming)	Sulfite + Acceptor + AMP <=> Adenylyl sulfate + Reduced acceptor	C00094 + C00028 + C00020 <=> C00224 + C00030	KEGG	1.8.99.2	1.8.99.2
R00861	hydrogen-sulfide:acceptor oxidoreductase	hydrogen-sulfide:acceptor oxidoreductase	Hydrogen sulfide + Acceptor + 3 H2O <=> Sulfite + Reduced acceptor	C00283 + C00028 + 3 C00001 <=> C00094 + C00030	KEGG	1.8.99.1	1.8.99.1
R00863	3-Sulfino-L-alanine 4-carboxy-lyase	3-Sulfino-L-alanine 4-carboxy-lyase	3-Sulfino-L-alanine <=> L-Alanine + Sulfur dioxide	C00606 <=> C00041 + C09306	KEGG	4.1.1.12	4.1.1.12
R00864	NO NAME	NO NAME	Sulfite + Sulfur <=> Thiosulfate	C00094 + C00087 <=> C00320	KEGG
R00865	D-Mannitol:ferricytochrome-c 2-oxidoreductase	D-Mannitol:ferricytochrome-c 2-oxidoreductase	Mannitol + 2 Ferricytochrome c <=> D-Fructose + 2 Ferrocytochrome c + 2 H+	C00392 + 2 C00125 <=> C00095 + 2 C00126 + 2 C00080	KEGG	1.1.2.2	1.1.2.2
R00866	ATP:D-fructose 1-phosphotransferase	ATP:D-fructose 1-phosphotransferase	ATP + D-Fructose <=> ADP + D-Fructose 1-phosphate	C00002 + C00095 <=> C00008 + C01094	KEGG	2.7.1.3	2.7.1.3
R00867	ATP:D-fructose 6-phosphotransferase	ATP:D-fructose 6-phosphotransferase	ATP + D-Fructose <=> ADP + beta-D-Fructose 6-phosphate	C00002 + C00095 <=> C00008 + C05345	KEGG	2.7.1.1，2.7.1.4	2.7.1.1
R00868	D-Mannitol:NAD+ 2-oxidoreductase	D-Mannitol:NAD+ 2-oxidoreductase	Mannitol + NAD+ <=> D-Fructose + NADH + H+	C00392 + C00003 <=> C00095 + C00004 + C00080	KEGG	1.1.1.11，1.1.1.67	1.1.1.11
R00870	D-Mannitol:NADP+ 2-oxidoreductase	D-Mannitol:NADP+ 2-oxidoreductase	Mannitol + NADP+ <=> D-Fructose + NADPH + H+	C00392 + C00006 <=> C00095 + C00005 + C00080	KEGG	1.1.1.138	1.1.1.138
R00871	D-Fructose:NADP+ 5-oxidoreductase	D-Fructose:NADP+ 5-oxidoreductase	D-Fructose + NADP+ <=> 5-Dehydro-D-fructose + NADPH + H+	C10906 + C00006 <=> C00273 + C00005 + C00080	KEGG	1.1.1.124	1.1.1.124
R00872	D-Fructose 2-phosphate phosphatase	D-Fructose 2-phosphate phosphatase	beta-D-Fructose 2-phosphate + H2O <=> D-Fructose + Orthophosphate	C03267 + C00001 <=> C00095 + C00009	KEGG	3.1.3.-	3.1.3.-
R00873	D-fructose:acceptor 5-oxidoreductase	D-fructose:acceptor 5-oxidoreductase	D-Fructose + Acceptor <=> 5-Dehydro-D-fructose + Reduced acceptor	C00095 + C00028 <=> C00273 + C00030	KEGG	1.1.99.11	1.1.99.11
R00874	D-Glucose:D-fructose oxidoreductase	D-Glucose:D-fructose oxidoreductase	D-Fructose + D-Glucose <=> D-Glucono-1,5-lactone + D-Sorbitol	C00095 + C00031 <=> C00198 + C00794	KEGG	1.1.99.28	1.1.99.28
R00875	D-Glucitol:NAD+ 2-oxidoreductase	D-Glucitol:NAD+ 2-oxidoreductase	D-Sorbitol + NAD+ <=> D-Fructose + NADH + H+	C00794 + C00003 <=> C00095 + C00004 + C00080	KEGG	1.1.1.14，1.1.1.15	1.1.1.14
R00876	ITP:D-fructose 6-phosphotransferase	ITP:D-fructose 6-phosphotransferase	ITP + D-Fructose <=> IDP + D-Fructose 6-phosphate	C00081 + C00095 <=> C00104 + C00085	KEGG	2.7.1.1	2.7.1.1
R00877	D-mannose aldose-ketose-isomerase	D-mannose aldose-ketose-isomerase	D-Mannose <=> D-Fructose	C00159 <=> C00095	KEGG	5.3.1.7	5.3.1.7
R00878	alpha-D-Glucose aldose-ketose-isomerase	alpha-D-Glucose aldose-ketose-isomerase	alpha-D-Glucose <=> D-Fructose	C00267 <=> C00095	KEGG	5.3.1.5	5.3.1.5
R00879	beta-D-Fructan fructohydrolase	beta-D-Fructan fructohydrolase	Fructan(n+1) + H2O <=> D-Fructose + Fructan(n)	C01355(n+1) + C00001 <=> C00095 + C01355(n)	KEGG	3.2.1.80	3.2.1.80
R00880	GDP-D-mannose:NAD+ 6-oxidoreductase	GDP-D-mannose:NAD+ 6-oxidoreductase	GDP-mannose + H2O + 2 NAD+ <=> GDP-D-mannuronate + 2 NADH + 2 H+	C00096 + C00001 + 2 C00003 <=> C00976 + 2 C00004 + 2 C00080	KEGG	1.1.1.132	1.1.1.132
R00881	GDP-mannose mannophosphohydrolase	GDP-mannose mannophosphohydrolase	GDP-mannose + H2O <=> GMP + D-Mannose 1-phosphate	C00096 + C00001 <=> C00144 + C00636	KEGG	3.6.1.21，3.6.1.-	3.6.1.21
R00883	GDP:D-mannose-1-phosphate guanylyltransferase	GDP:D-mannose-1-phosphate guanylyltransferase	GDP + D-Mannose 1-phosphate <=> Orthophosphate + GDP-mannose	C00035 + C00636 <=> C00009 + C00096	KEGG	2.7.7.22	2.7.7.22
R00885	GTP:alpha-D-mannose-1-phosphate guanylyltransferase	GTP:alpha-D-mannose-1-phosphate guanylyltransferase	GTP + D-Mannose 1-phosphate <=> Diphosphate + GDP-mannose	C00044 + C00636 <=> C00013 + C00096	KEGG	2.7.7.13	2.7.7.13
R00887	NO NAME	NO NAME	GDP-mannose + Mannan(n) <=> GDP + Mannan(n+1)	C00096 + C00464(n) <=> C00035 + C00464(n+1)	KEGG	2.4.1.-	2.4.1.-
R00888	GDP-mannose 4,6-hydro-lyase (GDP-4-dehydro-6-deoxy-D-mannose-forming)	GDP-mannose 4,6-hydro-lyase (GDP-4-dehydro-6-deoxy-D-mannose-forming)	GDP-mannose <=> GDP-4-dehydro-6-deoxy-D-mannose + H2O	C00096 <=> C01222 + C00001	KEGG	4.2.1.47	4.2.1.47
R00889	GDP-mannose 3,5-epimerase	GDP-mannose 3,5-epimerase	GDP-mannose <=> GDP-L-galactose	C00096 <=> C02280	KEGG	5.1.3.18	5.1.3.18
R00890	GDPmannose:mannan 1,4-beta-D-mannosyltransferase	GDPmannose:mannan 1,4-beta-D-mannosyltransferase	GDP-mannose + 1,4-beta-D-Mannan <=> GDP + 1,4-beta-D-Mannan	C00096 + C02492 <=> C00035 + C02492	KEGG	2.4.1.-	2.4.1.-
R00891	L-serine hydro-lyase (adding hydrogen sulfide, L-cysteine-forming)	L-serine hydro-lyase (adding hydrogen sulfide, L-cysteine-forming)	L-Serine + Hydrogen sulfide <=> L-Cysteine + H2O	C00065 + C00283 <=> C00097 + C00001	KEGG	4.2.1.22	4.2.1.22
R00892	L-cysteine:NAD+ oxidoreductase; NADH:L-cystine oxidoreductase	L-cysteine:NAD+ oxidoreductase;	2 L-Cysteine + NAD+ <=> L-Cystine + H+ + NADH	2 C00097 + C00003 <=> C00491 + C00080 + C00004	KEGG	1.8.1.6	1.8.1.6
R00893	L-Cysteine:oxygen oxidoreductase	L-Cysteine:oxygen oxidoreductase	L-Cysteine + Oxygen <=> 3-Sulfino-L-alanine	C00097 + C00007 <=> C00606	KEGG	1.13.11.20	1.13.11.20
R00894	L-glutamate:L-cysteine gamma-ligase (ADP-forming)	L-glutamate:L-cysteine gamma-ligase (ADP-forming)	ATP + L-Glutamate + L-Cysteine <=> ADP + Orthophosphate + gamma-L-Glutamyl-L-cysteine	C00002 + C00025 + C00097 <=> C00008 + C00009 + C00669	KEGG	6.3.2.2	6.3.2.2
R00895	L-Cysteine:2-oxoglutarate aminotransferase	L-Cysteine:2-oxoglutarate aminotransferase	L-Cysteine + 2-Oxoglutarate <=> Mercaptopyruvate + L-Glutamate	C00097 + C00026 <=> C00957 + C00025	KEGG	2.6.1.1，2.6.1.3	2.6.1.1
R00896	L-cysteine:2-oxoglutarate aminotransferase	L-cysteine:2-oxoglutarate aminotransferase	L-Cysteine + 2-Oxoglutarate <=> Mercaptopyruvate + DL-Glutamate	C00097 + C00026 <=> C00957 + C00302	KEGG	2.6.1.1	2.6.1.1
R00897	O3-acetyl-L-serine:hydrogen-sulfide 2-amino-2-carboxyethyltransferase; O3-acetyl-L-serine acetate-lyase (adding hydrogen sulfide)	O3-acetyl-L-serine acetate-lyase (adding hydrogen sulfide)	O-Acetyl-L-serine + Hydrogen sulfide <=> L-Cysteine + Acetate	C00979 + C00283 <=> C00097 + C00033	KEGG	2.5.1.47，2.5.1.65	2.5.1.47
R00899	L-cysteinylglycine dipeptidase	L-cysteinylglycine dipeptidase	Cys-Gly + H2O <=> L-Cysteine + Glycine	C01419 + C00001 <=> C00097 + C00037	KEGG	3.4.11.1，3.4.11.2，3.4.11.23，3.4.13.3	3.4.11.1
R00900	L-cysteine,glutathione:NADP+ oxidoreductase (disulfide-forming); NADPH:CoA-glutathione oxidoreductase	L-cysteine,glutathione:NADP+ oxidoreductase (disulfide-forming);	L-Cysteine + Glutathione + NADP+ <=> S-Glutathionyl-L-cysteine + NADPH	C00097 + C00051 + C00006 <=> C05526 + C00005	KEGG	1.8.1.9，1.8.1.10	1.8.1.9
R00901	L-cysteine hydrogen-sulfide-lyase (adding sulfite; L-cysteate-forming)	L-cysteine hydrogen-sulfide-lyase (adding sulfite; L-cysteate-forming)	L-Cysteine + Sulfite <=> Hydrogen sulfide + L-Cysteate	C00097 + C00094 <=> C00283 + C00506	KEGG	4.4.1.10	4.4.1.10
R00903	2-Amino-3-mercaptopropionic acid racemase; cysteine racemase	cysteine racemase	L-Cysteine <=> D-Cysteine	C00097 <=> C00793	KEGG	5.1.1.10	5.1.1.10
R00904	3-aminopropanal:NAD+ oxidoreductase	3-aminopropanal:NAD+ oxidoreductase	3-Aminopropanal + NAD+ + H2O <=> beta-Alanine + NADH + H+	C05665 + C00003 + C00001 <=> C00099 + C00004 + C00080	KEGG	1.2.1.3，1.2.1.5，1.2.1.19	1.2.1.3
R00905	N-Carbamoyl-beta-alanine amidohydrolase	N-Carbamoyl-beta-alanine amidohydrolase	3-Ureidopropionate + H2O <=> beta-Alanine + CO2 + NH3	C02642 + C00001 <=> C00099 + C00011 + C00014	KEGG	3.5.1.6	3.5.1.6
R00906	N-(D-1-carboxyethyl)-beta-alanine:NAD+ oxidoreductase (beta-alanine-forming)	N-(D-1-carboxyethyl)-beta-alanine:NAD+ oxidoreductase (beta-alanine-forming)	beta-Alanopine + NAD+ + H2O <=> beta-Alanine + Pyruvate + NADH + H+	C02207 + C00003 + C00001 <=> C00099 + C00022 + C00004 + C00080	KEGG	1.5.1.26	1.5.1.26
R00907	L-Alanine:3-oxopropanoate aminotransferase	L-Alanine:3-oxopropanoate aminotransferase	L-Alanine + 3-Oxopropanoate <=> Pyruvate + beta-Alanine	C00041 + C00222 <=> C00022 + C00099	KEGG	2.6.1.18	2.6.1.18
R00908	beta-alanine:2-oxoglutarate aminotransferase	beta-alanine:2-oxoglutarate aminotransferase	beta-Alanine + 2-Oxoglutarate <=> 3-Oxopropanoate + L-Glutamate	C00099 + C00026 <=> C00222 + C00025	KEGG	2.6.1.19，2.6.1.55	2.6.1.19
R00909	N-Acetyl-beta-alanine amidohydrolase	N-Acetyl-beta-alanine amidohydrolase	N-Acetyl-beta-alanine + H2O <=> Acetate + beta-Alanine	C01073 + C00001 <=> C00033 + C00099	KEGG	3.5.1.21	3.5.1.21
R00910	L-lysine:beta-alanine ligase (AMP-forming)	L-lysine:beta-alanine ligase (AMP-forming)	ATP + L-Lysine + beta-Alanine <=> AMP + Diphosphate + beta-Alanyl-L-lysine	C00002 + C00047 + C00099 <=> C00020 + C00013 + C05341	KEGG	6.3.2.11	6.3.2.11
R00911	beta-Alanyl-L-lysine hydrolase	beta-Alanyl-L-lysine hydrolase	beta-Alanyl-L-lysine + H2O <=> beta-Alanine + L-Lysine	C05341 + C00001 <=> C00099 + C00047	KEGG	3.4.13.4	3.4.13.4
R00912	L-arginine:beta-alanine ligase (AMP-forming)	L-arginine:beta-alanine ligase (AMP-forming)	ATP + L-Arginine + beta-Alanine <=> AMP + Diphosphate + beta-Alanyl-L-arginine	C00002 + C00062 + C00099 <=> C00020 + C00013 + C05340	KEGG	6.3.2.11	6.3.2.11
R00913	3-Guanidinopropanoate amidinopropionase	3-Guanidinopropanoate amidinopropionase	3-Guanidinopropanoate + H2O <=> beta-Alanine + Urea	C03065 + C00001 <=> C00099 + C00086	KEGG	3.5.3.17	3.5.3.17
R00914	beta-alanine CoA-transferase	beta-alanine CoA-transferase	beta-Alanine <=> beta-Alanyl-CoA	C00099 <=> C02335	KEGG	2.8.3.-	2.8.3.-
R00915	NO NAME	NO NAME	beta-Alanine <=> Quinolinate	C00099 <=> C03722	KEGG
R00916	NO NAME	NO NAME	beta-Alanine <=> beta-Nitropropanoate	C00099 <=> C05669	KEGG
R00917	beta-aminopropionitrile aminohydrolase	beta-aminopropionitrile aminohydrolase	beta-Alanine + NH3 <=> 3-Aminopropiononitrile + 2 H2O	C00099 + C00014 <=> C05670 + 2 C00001	KEGG
R00918	propanoyl-CoA:(2S)-methylmalonyl-CoA malonyltransferase (cyclizing); propanoyl-CoA:(2S)-methylmalonyl-CoA 2-C-acyltransferase (decarboxylating, oxoacyl-reducing and cyclizing)	propanoyl-CoA:(2S)-methylmalonyl-CoA malonyltransferase (cyclizing)	Propanoyl-CoA + 6 (S)-Methylmalonyl-CoA + 6 NADPH + 6 H+ <=> 6-Deoxyerythronolide B + 7 CoA + 6 CO2 + H2O + 6 NADP+	C00100 + 6 C00683 + 6 C00005 + 6 C00080 <=> C03240 + 7 C00010 + 6 C00011 + C00001 + 6 C00006	KEGG	2.3.1.94	2.3.1.94
R00919	propanoyl-CoA:NADP+ 2-oxidoreductase; Acrylyl-CoA reductase (NADPH)	propanoyl-CoA:NADP+ 2-oxidoreductase;	Propanoyl-CoA + NADP+ <=> Propenoyl-CoA + NADPH + H+	C00100 + C00006 <=> C00894 + C00005 + C00080	KEGG	1.3.1.84，1.3.1.-	1.3.1.84
R00920	Propanoate:CoA ligase (ADP-forming)	Propanoate:CoA ligase (ADP-forming)	ATP + Propanoate + CoA <=> ADP + Orthophosphate + Propanoyl-CoA	C00002 + C00163 + C00010 <=> C00008 + C00009 + C00100	KEGG	6.2.1.13	6.2.1.13
R00921	propanoyl-CoA:phosphate propanoyltransferase	propanoyl-CoA:phosphate propanoyltransferase	Propanoyl-CoA + Orthophosphate <=> Propanoyl phosphate + CoA	C00100 + C00009 <=> C02876 + C00010	KEGG	2.3.1.8	2.3.1.8
R00922	2-Methyl-3-oxopropanoate:NAD+ oxidoreductase (CoA-propanoylating)	2-Methyl-3-oxopropanoate:NAD+ oxidoreductase (CoA-propanoylating)	2-Methyl-3-oxopropanoate + CoA + NAD+ <=> Propanoyl-CoA + CO2 + NADH + H+	C00349 + C00010 + C00003 <=> C00100 + C00011 + C00004 + C00080	KEGG	1.2.1.27	1.2.1.27
R00923	(S)-methylmalonyl-CoA carboxy-lyase (propanoyl-CoA-forming)	(S)-methylmalonyl-CoA carboxy-lyase (propanoyl-CoA-forming)	(S)-Methylmalonyl-CoA <=> Propanoyl-CoA + CO2	C00683 <=> C00100 + C00011	KEGG	4.1.1.41	4.1.1.41
R00924	Propanoyl-CoA:(acceptor) 2,3-oxidoreductase	Propanoyl-CoA:(acceptor) 2,3-oxidoreductase	Propanoyl-CoA + FAD <=> FADH2 + Propenoyl-CoA	C00100 + C00016 <=> C01352 + C00894	KEGG	1.3.99.3	1.3.99.3
R00925	Propanoate:CoA ligase (AMP-forming)	Propanoate:CoA ligase (AMP-forming)	ATP + Propanoate + CoA <=> AMP + Diphosphate + Propanoyl-CoA	C00002 + C00163 + C00010 <=> C00020 + C00013 + C00100	KEGG	6.2.1.1，6.2.1.17	6.2.1.1
R00926	Propionyladenylate:CoA propionyltransferase	Propionyladenylate:CoA propionyltransferase	Propionyladenylate + CoA <=> AMP + Propanoyl-CoA	C05983 + C00010 <=> C00020 + C00100	KEGG	6.2.1.1，6.2.1.17	6.2.1.1
R00927	acetyl-CoA:propanoyl-CoA 2-C-acetyltransferase; 2-methylacetoacetyl-CoA thiolase	2-methylacetoacetyl-CoA thiolase	Propanoyl-CoA + Acetyl-CoA <=> CoA + 2-Methylacetoacetyl-CoA	C00100 + C00024 <=> C00010 + C03344	KEGG	2.3.1.9，2.3.1.16	2.3.1.9
R00928	Acetyl-CoA:propanoate CoA-transferase	Acetyl-CoA:propanoate CoA-transferase	Acetyl-CoA + Propanoate <=> Acetate + Propanoyl-CoA	C00024 + C00163 <=> C00033 + C00100	KEGG	2.8.3.1	2.8.3.1
R00930	(S)-2-Methyl-3-oxopropanoyl-CoA:pyruvate carboxyltransferase	(S)-2-Methyl-3-oxopropanoyl-CoA:pyruvate carboxyltransferase	(S)-Methylmalonyl-CoA + Pyruvate <=> Propanoyl-CoA + Oxaloacetate	C00683 + C00022 <=> C00100 + C00036	KEGG	2.1.3.1	2.1.3.1
R00931	propanoyl-CoA:oxaloacetate C-propanoyltransferase (thioester-hydrolysing, 1-carboxyethyl-forming); 2-methylcitrate oxaloacetate-lyase	2-methylcitrate oxaloacetate-lyase	2-Methylcitrate + CoA <=> Propanoyl-CoA + Oxaloacetate + H2O	C02225 + C00010 <=> C00100 + C00036 + C00001	KEGG	2.3.3.5	2.3.3.5
R00932	propanoyl-CoA:glyoxylate C-propanoyltransferase (thioester-hydrolysing, 2-carboxyethyl-forming); 2-hydroxyglutarate glyoxylate-lyase (CoA-propanoylating)	2-hydroxyglutarate glyoxylate-lyase (CoA-propanoylating)	2-Hydroxyglutarate + CoA <=> Propanoyl-CoA + H2O + Glyoxylate	C02630 + C00010 <=> C00100 + C00001 + C00048	KEGG	2.3.3.11	2.3.3.11
R00934	L-erythro-3-Methylmalyl-CoA glyoxylate-lyase (propanoyl-CoA-forming)	L-erythro-3-Methylmalyl-CoA glyoxylate-lyase (propanoyl-CoA-forming)	Propanoyl-CoA + Glyoxylate <=> L-erythro-3-Methylmalyl-CoA	C00100 + C00048 <=> C06027	KEGG	4.1.3.24	4.1.3.24
R00935	(S)-Methylmalonate semialdehyde:NAD+ oxidoreductase (CoA-propanoylating)	(S)-Methylmalonate semialdehyde:NAD+ oxidoreductase (CoA-propanoylating)	(S)-Methylmalonate semialdehyde + CoA + NAD+ <=> Propanoyl-CoA + CO2 + NADH + H+	C06002 + C00010 + C00003 <=> C00100 + C00011 + C00004 + C00080	KEGG	1.2.1.27	1.2.1.27
R00936	5,6,7,8-tetrahydrofolate:NAD+ oxidoreductase	5,6,7,8-tetrahydrofolate:NAD+ oxidoreductase	Tetrahydrofolate + NAD+ <=> Dihydrofolate + NADH + H+	C00101 + C00003 <=> C00415 + C00004 + C00080	KEGG	1.5.1.3	1.5.1.3
R00937	5,6,7,8-tetrahydrofolate:NAD+ oxidoreductase	5,6,7,8-tetrahydrofolate:NAD+ oxidoreductase	Tetrahydrofolate + 2 NAD+ <=> Folate + 2 NADH + 2 H+	C00101 + 2 C00003 <=> C00504 + 2 C00004 + 2 C00080	KEGG	1.5.1.3	1.5.1.3
R00939	5,6,7,8-tetrahydrofolate:NADP+ oxidoreductase	5,6,7,8-tetrahydrofolate:NADP+ oxidoreductase	Tetrahydrofolate + NADP+ <=> Dihydrofolate + NADPH + H+	C00101 + C00006 <=> C00415 + C00005 + C00080	KEGG	1.5.1.3	1.5.1.3
R00940	5,6,7,8-tetrahydrofolate:NADP+ oxidoreductase	5,6,7,8-tetrahydrofolate:NADP+ oxidoreductase	Tetrahydrofolate + 2 NADP+ <=> Folate + 2 NADPH + 2 H+	C00101 + 2 C00006 <=> C00504 + 2 C00005 + 2 C00080	KEGG	1.5.1.3	1.5.1.3
R00941	10-formyltetrahydrofolate:NADP+ oxidoreductase	10-formyltetrahydrofolate:NADP+ oxidoreductase	10-Formyltetrahydrofolate + NADP+ + H2O <=> Tetrahydrofolate + CO2 + NADPH + H+	C00234 + C00006 + C00001 <=> C00101 + C00011 + C00005 + C00080	KEGG	1.5.1.6	1.5.1.6
R00942	Tetrahydrofolate:L-glutamate gamma-ligase (ADP-forming)	Tetrahydrofolate:L-glutamate gamma-ligase (ADP-forming)	ATP + Tetrahydrofolate + L-Glutamate <=> ADP + Orthophosphate + Tetrahydrofolyl-[Glu](2)	C00002 + C00101 + C00025 <=> C00008 + C00009 + C09332	KEGG	6.3.2.17	6.3.2.17
R00943	Formate:tetrahydrofolate ligase (ADP-forming)	Formate:tetrahydrofolate ligase (ADP-forming)	Tetrahydrofolate + Formate + ATP <=> ADP + Orthophosphate + 10-Formyltetrahydrofolate	C00101 + C00058 + C00002 <=> C00008 + C00009 + C00234	KEGG	6.3.4.3	6.3.4.3
R00944	10-Formyltetrahydrofolate amidohydrolase	10-Formyltetrahydrofolate amidohydrolase	10-Formyltetrahydrofolate + H2O <=> Formate + Tetrahydrofolate	C00234 + C00001 <=> C00058 + C00101	KEGG	3.5.1.10	3.5.1.10
R00945	5,10-Methylenetetrahydrofolate:glycine hydroxymethyltransferase	5,10-Methylenetetrahydrofolate:glycine hydroxymethyltransferase	5,10-Methylenetetrahydrofolate + Glycine + H2O <=> Tetrahydrofolate + L-Serine	C00143 + C00037 + C00001 <=> C00101 + C00065	KEGG	2.1.2.1	2.1.2.1
R00946	5-Methyltetrahydrofolate:L-homocysteine S-methyltransferase	5-Methyltetrahydrofolate:L-homocysteine S-methyltransferase	5-Methyltetrahydrofolate + L-Homocysteine <=> Tetrahydrofolate + L-Methionine	C00440 + C00155 <=> C00101 + C00073	KEGG	2.1.1.13	2.1.1.13
R00947	alpha-D-glucose-1-phosphate phosphohydrolase	alpha-D-glucose-1-phosphate phosphohydrolase	D-Glucose 1-phosphate + H2O <=> alpha-D-Glucose + Orthophosphate	C00103 + C00001 <=> C00267 + C00009	KEGG	3.1.3.10	3.1.3.10
R00948	ATP:alpha-D-glucose-1-phosphate adenyltransferase	ATP:alpha-D-glucose-1-phosphate adenyltransferase	ATP + D-Glucose 1-phosphate <=> Diphosphate + ADP-glucose	C00002 + C00103 <=> C00013 + C00498	KEGG	2.7.7.27	2.7.7.27
R00949	ATP:D-glucose-1-phosphate 6-phosphotransferase	ATP:D-glucose-1-phosphate 6-phosphotransferase	ATP + D-Glucose 1-phosphate <=> ADP + alpha-D-Glucose 1,6-bisphosphate	C00002 + C00103 <=> C00008 + C01231	KEGG	2.7.1.10	2.7.1.10
R00951	ADP-glucose Glucose-1-phosphohydrolase	ADP-glucose Glucose-1-phosphohydrolase	ADP-glucose + H2O <=> AMP + D-Glucose 1-phosphate	C00498 + C00001 <=> C00020 + C00103	KEGG	3.6.1.21	3.6.1.21
R00952	cellobiose:phosphate alpha-D-glucosyltransferase	cellobiose:phosphate alpha-D-glucosyltransferase	Cellobiose + Orthophosphate <=> D-Glucose 1-phosphate + D-Glucose	C00185 + C00009 <=> C00103 + C00031	KEGG	2.4.1.20	2.4.1.20
R00953	3-beta-D-glucosyl-D-glucose:phosphate alpha-D-glucosyltransferase	3-beta-D-glucosyl-D-glucose:phosphate alpha-D-glucosyltransferase	Laminaribiose + Orthophosphate <=> D-Glucose + D-Glucose 1-phosphate	C02048 + C00009 <=> C00031 + C00103	KEGG	2.4.1.31	2.4.1.31
R00954	GTP:alpha-D-glucose-1-phosphate guanylyltransferase	GTP:alpha-D-glucose-1-phosphate guanylyltransferase	GTP + D-Glucose 1-phosphate <=> Diphosphate + GDP-glucose	C00044 + C00103 <=> C00013 + C00394	KEGG	2.7.7.34	2.7.7.34
R00955	UDP-glucose:alpha-D-galactose-1-phosphate uridylyltransferase	UDP-glucose:alpha-D-galactose-1-phosphate uridylyltransferase	UDP-glucose + alpha-D-Galactose 1-phosphate <=> D-Glucose 1-phosphate + UDP-D-galactose	C00029 + C00446 <=> C00103 + C00052	KEGG	2.7.7.12	2.7.7.12
R00956	CTP:alpha-D-glucose-1-phosphate cytidylyltransferase	CTP:alpha-D-glucose-1-phosphate cytidylyltransferase	CTP + D-Glucose 1-phosphate <=> Diphosphate + CDP-glucose	C00063 + C00103 <=> C00013 + C00501	KEGG	2.7.7.33	2.7.7.33
R00957	alpha-D-Glucose-1-phosphate:alpha-D-glucose-1-phosphate 4-alpha-D-glucosyltransferase (dephosphorylating)	alpha-D-Glucose-1-phosphate:alpha-D-glucose-1-phosphate 4-alpha-D-glucosyltransferase (dephosphorylating)	2 D-Glucose 1-phosphate + H2O <=> Maltose + 2 Orthophosphate	2 C00103 + C00001 <=> C00208 + 2 C00009	KEGG	2.4.1.139	2.4.1.139
R00959	alpha-D-Glucose 1-phosphate 1,6-phosphomutase	alpha-D-Glucose 1-phosphate 1,6-phosphomutase	D-Glucose 1-phosphate <=> alpha-D-Glucose 6-phosphate	C00103 <=> C00668	KEGG	5.4.2.2，5.4.2.5	5.4.2.2
R00960	D-Glucose-1-phosphate:D-glucose-1-phosphate 6-phosphotransferase	D-Glucose-1-phosphate:D-glucose-1-phosphate 6-phosphotransferase	2 D-Glucose 1-phosphate <=> alpha-D-Glucose 1,6-bisphosphate + alpha-D-Glucose	2 C00103 <=> C01231 + C00267	KEGG	2.7.1.41	2.7.1.41
R00961	IDP phosphohydrolase	IDP phosphohydrolase	IDP + H2O <=> IMP + Orthophosphate	C00104 + C00001 <=> C00130 + C00009	KEGG	3.6.1.5，3.6.1.6	3.6.1.5
R00962	ITP:cytidine 5'-phosphotransferase	ITP:cytidine 5'-phosphotransferase	ITP + Cytidine <=> IDP + CMP	C00081 + C00475 <=> C00104 + C00055	KEGG	2.7.1.48	2.7.1.48
R00963	Uridine 5'-monophosphate phosphohydrolase	Uridine 5'-monophosphate phosphohydrolase	UMP + H2O <=> Uridine + Orthophosphate	C00105 + C00001 <=> C00299 + C00009	KEGG	3.1.3.5	3.1.3.5
R00964	ATP:uridine 5'-phosphotransferase	ATP:uridine 5'-phosphotransferase	ATP + Uridine <=> ADP + UMP	C00002 + C00299 <=> C00008 + C00105	KEGG	2.7.1.48	2.7.1.48
R00965	orotidine-5'-phosphate carboxy-lyase (UMP-forming)	orotidine-5'-phosphate carboxy-lyase (UMP-forming)	Orotidine 5'-phosphate <=> UMP + CO2	C01103 <=> C00105 + C00011	KEGG	4.1.1.23	4.1.1.23
R00966	UMP:diphosphate phospho-alpha-D-ribosyltransferase	UMP:diphosphate phospho-alpha-D-ribosyltransferase	UMP + Diphosphate <=> Uracil + 5-Phospho-alpha-D-ribose 1-diphosphate	C00105 + C00013 <=> C00106 + C00119	KEGG	2.4.2.9	2.4.2.9
R00967	UTP:uridine 5'-phosphotransferase	UTP:uridine 5'-phosphotransferase	UTP + Uridine <=> UDP + UMP	C00075 + C00299 <=> C00015 + C00105	KEGG	2.7.1.48	2.7.1.48
R00968	GTP:uridine 5'-phosphotransferase	GTP:uridine 5'-phosphotransferase	GTP + Uridine <=> GDP + UMP	C00044 + C00299 <=> C00035 + C00105	KEGG	2.7.1.48	2.7.1.48
R00969	P1,P4-bis(5'-uridyl)-tetraphosphate uridylohydrolase	P1,P4-bis(5'-uridyl)-tetraphosphate uridylohydrolase	P1,P4-Bis(5'-uridyl) tetraphosphate + H2O <=> UTP + UMP	C06198 + C00001 <=> C00075 + C00105	KEGG	3.6.1.17	3.6.1.17
R00970	ITP:uridine 5'-phosphotransferase	ITP:uridine 5'-phosphotransferase	ITP + Uridine <=> IDP + UMP	C00081 + C00299 <=> C00104 + C00105	KEGG	2.7.1.48	2.7.1.48
R00973	uracil-5-carboxylate carboxy-lyase (uracil-forming)	uracil-5-carboxylate carboxy-lyase (uracil-forming)	Uracil 5-carboxylate <=> Uracil + CO2	C03030 <=> C00106 + C00011	KEGG	4.1.1.66	4.1.1.66
R00974	Cytosine aminohydrolase	Cytosine aminohydrolase	Cytosine + H2O <=> Uracil + NH3	C00380 + C00001 <=> C00106 + C00014	KEGG	3.5.4.1	3.5.4.1
R00975	5,6-Dihydrouracil:oxygen oxidoreductase	5,6-Dihydrouracil:oxygen oxidoreductase	5,6-Dihydrouracil + Oxygen <=> Uracil + Hydrogen peroxide	C00429 + C00007 <=> C00106 + C00027	KEGG	1.3.3.7	1.3.3.7
R00976	uracil:acceptor oxidoreductase	uracil:acceptor oxidoreductase	Uracil + Acceptor + H2O <=> Barbiturate + Reduced acceptor	C00106 + C00028 + C00001 <=> C00813 + C00030	KEGG	1.17.99.4	1.17.99.4
R00977	5,6-Dihydrouracil:NAD+ oxidoreductase	5,6-Dihydrouracil:NAD+ oxidoreductase	5,6-Dihydrouracil + NAD+ <=> Uracil + NADH + H+	C00429 + C00003 <=> C00106 + C00004 + C00080	KEGG	1.3.1.1	1.3.1.1
R00978	5,6-Dihydrouracil:NADP+ oxidoreductase	5,6-Dihydrouracil:NADP+ oxidoreductase	5,6-Dihydrouracil + NADP+ <=> Uracil + NADPH + H+	C00429 + C00006 <=> C00106 + C00005 + C00080	KEGG	1.3.1.2	1.3.1.2
R00979	ATP:anthranilate N-adenylyltransferase	ATP:anthranilate N-adenylyltransferase	ATP + Anthranilate <=> Diphosphate + N-Adenylylanthranilate	C00002 + C00108 <=> C00013 + C03293	KEGG	2.7.7.55	2.7.7.55
R00980	Anthranilate,NADPH:oxygen oxidoreductase (3-hydroxylating, deaminating)	Anthranilate,NADPH:oxygen oxidoreductase (3-hydroxylating, deaminating)	Anthranilate + Oxygen + NADPH + H+ <=> 2,3-Dihydroxybenzoate + NH3 + NADP+	C00108 + C00007 + C00005 + C00080 <=> C00196 + C00014 + C00006	KEGG	1.14.13.35	1.14.13.35
R00982	Anthranilate:CoA ligase (AMP-forming)	Anthranilate:CoA ligase (AMP-forming)	ATP + Anthranilate + CoA <=> AMP + Diphosphate + Anthranilyl-CoA	C00002 + C00108 + C00010 <=> C00020 + C00013 + C02247	KEGG	6.2.1.32	6.2.1.32
R00983	2,3-Dihydroxyindole:oxygen 2,3-oxidoreductase (decyclizing)	2,3-Dihydroxyindole:oxygen 2,3-oxidoreductase (decyclizing)	2,3-Dihydroxyindole + Oxygen <=> Anthranilate + CO2	C02775 + C00007 <=> C00108 + C00011	KEGG	1.13.11.23	1.13.11.23
R00984	S-Adenosyl-L-methionine:anthranilate N-methyltransferase	S-Adenosyl-L-methionine:anthranilate N-methyltransferase	S-Adenosyl-L-methionine + Anthranilate <=> S-Adenosyl-L-homocysteine + N-Methylanthranilate	C00019 + C00108 <=> C00021 + C03005	KEGG	2.1.1.111	2.1.1.111
R00985	chorismate pyruvate-lyase (amino-accepting; anthranilate-forming)	chorismate pyruvate-lyase (amino-accepting; anthranilate-forming)	Chorismate + NH3 <=> Anthranilate + Pyruvate + H2O	C00251 + C00014 <=> C00108 + C00022 + C00001	KEGG	4.1.3.27	4.1.3.27
R00986	Chorismate pyruvate-lyase (amino-accepting)	Chorismate pyruvate-lyase (amino-accepting)	Chorismate + L-Glutamine <=> Anthranilate + Pyruvate + L-Glutamate	C00251 + C00064 <=> C00108 + C00022 + C00025	KEGG	4.1.3.27	4.1.3.27
R00987	L-Kynurenine hydrolase	L-Kynurenine hydrolase	L-Kynurenine + H2O <=> Anthranilate + L-Alanine	C00328 + C00001 <=> C00108 + C00041	KEGG	3.7.1.3	3.7.1.3
R00988	N-Formylanthranilate amidohydrolase	N-Formylanthranilate amidohydrolase	Formylanthranilate + H2O <=> Formate + Anthranilate	C05653 + C00001 <=> C00058 + C00108	KEGG	3.5.1.9	3.5.1.9
R00989	Malonyl-CoA:anthranilate N-malonyltransferase	Malonyl-CoA:anthranilate N-malonyltransferase	Malonyl-CoA + Anthranilate <=> CoA + N-Malonylanthranilate	C00083 + C00108 <=> C00010 + C03147	KEGG	2.3.1.113	2.3.1.113
R00990	2-Aminobenzoate carboxy-lyase	2-Aminobenzoate carboxy-lyase	Anthranilate <=> Aniline + CO2	C00108 <=> C00292 + C00011	KEGG	4.1.1.24	4.1.1.24
R00991	NO NAME	NO NAME	Anthranilate <=> 2-Formaminobenzoylacetate	C00108 <=> C05835	KEGG
R00993	2-oxobutanoate:oxygen 2-oxidoreductase (phosphorylating)	2-oxobutanoate:oxygen 2-oxidoreductase (phosphorylating)	2-Oxobutanoate + Orthophosphate + Oxygen <=> Propanoyl phosphate + CO2 + H2O	C00109 + C00009 + C00007 <=> C02876 + C00011 + C00001	KEGG	1.2.3.-	1.2.3.-
R00994	(2R,3S)-3-methylmalate:NAD+ oxidoreductase	(2R,3S)-3-methylmalate:NAD+ oxidoreductase	2-Oxobutanoate + CO2 + NADH + H+ <=> D-erythro-3-Methylmalate + NAD+	C00109 + C00011 + C00004 + C00080 <=> C06032 + C00003	KEGG	1.1.1.85	1.1.1.85
R00995	methyloxaloacetate carboxy-lyase (2-oxobutanoate-forming)	methyloxaloacetate carboxy-lyase (2-oxobutanoate-forming)	2-Oxobutanoate + CO2 <=> Methyloxaloacetate	C00109 + C00011 <=> C06030	KEGG	4.1.1.3	4.1.1.3
R00996	L-threonine ammonia-lyase (2-oxobutanoate-forming)	L-threonine ammonia-lyase (2-oxobutanoate-forming)	L-Threonine <=> 2-Oxobutanoate + NH3	C00188 <=> C00109 + C00014	KEGG	4.3.1.19	4.3.1.19
R00997	1-aminocyclopropane-1-carboxylate aminohydrolase (isomerizing); 1-aminocyclopropane-1-carboxylate endolyase (deaminating)	1-aminocyclopropane-1-carboxylate aminohydrolase (isomerizing)	1-Aminocyclopropane-1-carboxylate + H2O <=> 2-Oxobutanoate + NH3	C01234 + C00001 <=> C00109 + C00014	KEGG	3.5.99.7	3.5.99.7
R00998	acetyl-CoA:2-oxobutanoate C-acetyltransferase (thioester-hydrolysing, carboxymethyl-forming); (R)-2-ethylmalate 2-oxobutanoyl-lyase (CoA-acylating)	(R)-2-ethylmalate 2-oxobutanoyl-lyase (CoA-acylating)	(R)-2-Ethylmalate + CoA <=> Acetyl-CoA + H2O + 2-Oxobutanoate	C02488 + C00010 <=> C00024 + C00001 + C00109	KEGG	2.3.3.6	2.3.3.6
R00999	O-Succinyl-L-homoserine succinate-lyase (deaminating; 2-oxobutanoate-forming)	O-Succinyl-L-homoserine succinate-lyase (deaminating; 2-oxobutanoate-forming)	O-Succinyl-L-homoserine + H2O <=> 2-Oxobutanoate + Succinate + NH3	C01118 + C00001 <=> C00109 + C00042 + C00014	KEGG	2.5.1.48	2.5.1.48
R01000	2-Hydroxybutyrate:NAD+ oxidoreductase	2-Hydroxybutyrate:NAD+ oxidoreductase	2-Hydroxybutanoic acid + NAD+ <=> 2-Oxobutanoate + NADH + H+	C05984 + C00003 <=> C00109 + C00004 + C00080	KEGG	1.1.1.27	1.1.1.27
R01001	L-cystathionine cysteine-lyase (deaminating; 2-oxobutanoate-forming)	L-cystathionine cysteine-lyase (deaminating; 2-oxobutanoate-forming)	L-Cystathionine + H2O <=> L-Cysteine + NH3 + 2-Oxobutanoate	C02291 + C00001 <=> C00097 + C00014 + C00109	KEGG	4.4.1.1	4.4.1.1
R01003	dolichyl-phosphate phosphohydrolase	dolichyl-phosphate phosphohydrolase	Dolichyl phosphate + H2O <=> Dolichol + Orthophosphate	C00110 + C00001 <=> C00381 + C00009	KEGG	3.1.3.51	3.1.3.51
R01004	Dolichyl-diphosphate phosphohydrolase	Dolichyl-diphosphate phosphohydrolase	Dolichyl diphosphate + H2O <=> Dolichyl phosphate + Orthophosphate	C00621 + C00001 <=> C00110 + C00009	KEGG	3.6.1.43	3.6.1.43
R01005	UDPglucose:dolichyl-phosphate beta-D-glucosyltransferase	UDPglucose:dolichyl-phosphate beta-D-glucosyltransferase	UDP-glucose + Dolichyl phosphate <=> UDP + Dolichyl beta-D-glucosyl phosphate	C00029 + C00110 <=> C00015 + C01246	KEGG	2.4.1.117	2.4.1.117
R01006	Dolichyl-beta-D-glucosyl-phosphate dolichylphosphohydrolase	Dolichyl-beta-D-glucosyl-phosphate dolichylphosphohydrolase	Dolichyl beta-D-glucosyl phosphate + H2O <=> Dolichyl phosphate + D-Glucose	C01246 + C00001 <=> C00110 + C00031	KEGG	3.1.4.48	3.1.4.48
R01007	UDP-N-acetyl-D-glucosamine:dolichyl-phosphate N-acetyl-D-glucosamine phosphotransferase	UDP-N-acetyl-D-glucosamine:dolichyl-phosphate N-acetyl-D-glucosamine phosphotransferase	UDP-N-acetyl-D-glucosamine + Dolichyl phosphate <=> UMP + N-Acetyl-D-glucosaminyldiphosphodolichol	C00043 + C00110 <=> C00105 + C04500	KEGG	2.7.8.15	2.7.8.15
R01008	UDP-N-acetyl-D-glucosamine:dolichyl-phosphate alpha-N-acetyl-D-glucosaminyltransferase	UDP-N-acetyl-D-glucosamine:dolichyl-phosphate alpha-N-acetyl-D-glucosaminyltransferase	UDP-N-acetyl-D-glucosamine + Dolichyl phosphate <=> UDP + Dolichyl N-acetyl-alpha-D-glucosaminyl phosphate	C00043 + C00110 <=> C00015 + C04678	KEGG	2.4.1.153	2.4.1.153
R01009	GDPmannose:dolichyl-phosphate O-beta-D-mannosyltransferase	GDPmannose:dolichyl-phosphate O-beta-D-mannosyltransferase	GDP-mannose + Dolichyl phosphate <=> GDP + Dolichyl phosphate D-mannose	C00096 + C00110 <=> C00035 + C03862	KEGG	2.4.1.83	2.4.1.83
R01010	Glycerone phosphate phosphohydrolase	Glycerone phosphate phosphohydrolase	Glycerone phosphate + H2O <=> Glycerone + Orthophosphate	C00111 + C00001 <=> C00184 + C00009	KEGG	3.1.3.1，3.1.3.2	3.1.3.1
R01011	ATP:glycerone phosphotransferase	ATP:glycerone phosphotransferase	ATP + Glycerone <=> ADP + Glycerone phosphate	C00002 + C00184 <=> C00008 + C00111	KEGG	2.7.1.29	2.7.1.29
R01012	Phosphoenolpyruvate:glycerone phosphotransferase	Phosphoenolpyruvate:glycerone phosphotransferase	Phosphoenolpyruvate + Glycerone <=> Pyruvate + Glycerone phosphate	C00074 + C00184 <=> C00022 + C00111	KEGG	2.7.1.121	2.7.1.121
R01013	Acyl-CoA:glycerone-phosphate O-acyltransferase	Acyl-CoA:glycerone-phosphate O-acyltransferase	Acyl-CoA + Glycerone phosphate <=> CoA + Acylglycerone phosphate	C00040 + C00111 <=> C00010 + C03372	KEGG	2.3.1.42	2.3.1.42
R01014	erythrulose-1-phosphate formaldehyde-lyase (glycerone-phosphate-forming)	erythrulose-1-phosphate formaldehyde-lyase (glycerone-phosphate-forming)	Erythrulose 1-phosphate <=> Glycerone phosphate + Formaldehyde	C03394 <=> C00111 + C00067	KEGG	4.1.2.2	4.1.2.2
R01015	D-glyceraldehyde-3-phosphate aldose-ketose-isomerase	D-glyceraldehyde-3-phosphate aldose-ketose-isomerase	D-Glyceraldehyde 3-phosphate <=> Glycerone phosphate	C00118 <=> C00111	KEGG	5.3.1.1	5.3.1.1
R01016	glycerone-phosphate phosphate-lyase (methylglyoxal-forming)	glycerone-phosphate phosphate-lyase (methylglyoxal-forming)	Glycerone phosphate <=> Methylglyoxal + Orthophosphate	C00111 <=> C00546 + C00009	KEGG	4.2.3.3	4.2.3.3
R01018	CTP:dolichol O-phosphotransferase	CTP:dolichol O-phosphotransferase	CTP + Dolichol <=> CDP + Dolichyl phosphate	C00063 + C00381 <=> C00112 + C00110	KEGG	2.7.1.108	2.7.1.108
R01019	acetaldehyde:pyrroloquinoline-quinone oxidoreductase	acetaldehyde:pyrroloquinoline-quinone oxidoreductase	PQQ + Acetaldehyde + H2O <=> PQQH2 + Acetate	C00113 + C00084 + C00001 <=> C01359 + C00033	KEGG	1.2.99.3	1.2.99.3
R01021	ATP:choline phosphotransferase	ATP:choline phosphotransferase	ATP + Choline <=> ADP + Choline phosphate	C00002 + C00114 <=> C00008 + C00588	KEGG	2.7.1.32	2.7.1.32
R01022	Choline:oxygen 1-oxidoreductase	Choline:oxygen 1-oxidoreductase	Choline + Oxygen <=> Betaine aldehyde + Hydrogen peroxide	C00114 + C00007 <=> C00576 + C00027	KEGG	1.1.3.17	1.1.3.17
R01023	Acetyl-CoA:choline O-acetyltransferase	Acetyl-CoA:choline O-acetyltransferase	Acetyl-CoA + Choline <=> CoA + Acetylcholine	C00024 + C00114 <=> C00010 + C01996	KEGG	2.3.1.6	2.3.1.6
R01025	choline:acceptor 1-oxidoreductase	choline:acceptor 1-oxidoreductase	Choline + Acceptor <=> Betaine aldehyde + Reduced acceptor	C00114 + C00028 <=> C00576 + C00030	KEGG	1.1.99.1	1.1.99.1
R01026	Acetylcholine aectylhydrolase	Acetylcholine aectylhydrolase	Acetylcholine + H2O <=> Choline + Acetate	C01996 + C00001 <=> C00114 + C00033	KEGG	3.1.1.7，3.1.1.8	3.1.1.7
R01027	3'-phosphoadenylyl-sulfate:choline sulfotransferase	3'-phosphoadenylyl-sulfate:choline sulfotransferase	3'-Phosphoadenylyl sulfate + Choline <=> Adenosine 3',5'-bisphosphate + Choline sulfate	C00053 + C00114 <=> C00054 + C00919	KEGG	2.8.2.6	2.8.2.6
R01028	Choline sulfate sulfohydrolase	Choline sulfate sulfohydrolase	Choline sulfate + H2O <=> Choline + Sulfate	C00919 + C00001 <=> C00114 + C00059	KEGG	3.1.6.6	3.1.6.6
R01029	Acylcholine acylhydrolase	Acylcholine acylhydrolase	Acylcholine + H2O <=> Choline + Carboxylate	C01777 + C00001 <=> C00114 + C00060	KEGG	3.1.1.8	3.1.1.8
R01030	sn-Glycero-3-phosphocholine glycerophosphohydrolase	sn-Glycero-3-phosphocholine glycerophosphohydrolase	sn-glycero-3-Phosphocholine + H2O <=> Choline + sn-Glycerol 3-phosphate	C00670 + C00001 <=> C00114 + C00093	KEGG	3.1.4.2，3.1.4.46	3.1.4.2
R01031	3-chloro-D-alanine chloride-lyase (deaminating; pyruvate-forming)	3-chloro-D-alanine chloride-lyase (deaminating; pyruvate-forming)	3-Chloro-D-alanine + H2O <=> Pyruvate + Hydrochloric acid + NH3	C02634 + C00001 <=> C00022 + C01327 + C00014	KEGG	4.5.1.2	4.5.1.2
R01032	3-chloro-L-alanine chloride-lyase (deaminating; pyruvate-forming)	3-chloro-L-alanine chloride-lyase (deaminating; pyruvate-forming)	Cl- + Pyruvate + NH3 <=> 3-Chloro-L-alanine + H2O	C00698 + C00022 + C00014 <=> C02635 + C00001	KEGG
R01033	2-chlorobenzoate,NADH:oxygen oxidoreductase (1,2-hydroxylating, dechlorinating, decarboxylating)	2-chlorobenzoate,NADH:oxygen oxidoreductase (1,2-hydroxylating, dechlorinating, decarboxylating)	2-Chlorobenzoate + Oxygen + NADH <=> Cl- + Catechol + NAD+ + CO2	C02357 + C00007 + C00004 <=> C00698 + C00090 + C00003 + C00011	KEGG	1.14.12.13	1.14.12.13
R01034	glycerol:NAD+ 2-oxidoreductase	glycerol:NAD+ 2-oxidoreductase	Glycerol + NAD+ <=> Glycerone + NADH + H+	C00116 + C00003 <=> C00184 + C00004 + C00080	KEGG	1.1.1.6	1.1.1.6
R01036	Glycerol:NAD+ oxidoreductase	Glycerol:NAD+ oxidoreductase	Glycerol + NAD+ <=> D-Glyceraldehyde + NADH + H+	C00116 + C00003 <=> C00577 + C00004 + C00080	KEGG	1.1.1.21，1.1.1.72	1.1.1.21
R01039	glycerol:NADP+ 2-oxidoreductase (glycerone-forming)	glycerol:NADP+ 2-oxidoreductase (glycerone-forming)	Glycerol + NADP+ <=> Glycerone + NADPH + H+	C00116 + C00006 <=> C00184 + C00005 + C00080	KEGG	1.1.1.156	1.1.1.156
R01041	Glycerol:NADP+ oxidoreductase	Glycerol:NADP+ oxidoreductase	Glycerol + NADP+ <=> D-Glyceraldehyde + NADPH + H+	C00116 + C00006 <=> C00577 + C00005 + C00080	KEGG	1.1.1.2，1.1.1.21，1.1.1.72	1.1.1.2
R01043	Glycerol-2-phosphate phosphohydrolase	Glycerol-2-phosphate phosphohydrolase	Glycerol 2-phosphate + H2O <=> Glycerol + Orthophosphate	C02979 + C00001 <=> C00116 + C00009	KEGG	3.1.3.19	3.1.3.19
R01044	diphosphate:glycerol 1-phosphotransferase	diphosphate:glycerol 1-phosphotransferase	Diphosphate + Glycerol <=> Orthophosphate + Glycerol 1-phosphate	C00013 + C00116 <=> C00009 + C00623	KEGG	2.7.1.79	2.7.1.79
R01045	Glycerol:(acceptor) 1-oxidoreductase; glycerol:acceptor 2-oxidoreductase	Glycerol:(acceptor) 1-oxidoreductase	Glycerol + Acceptor <=> Glycerone + Reduced acceptor	C00116 + C00028 <=> C00184 + C00030	KEGG	1.1.99.22	1.1.99.22
R01047	glycerol hydro-lyase (3-hydroxypropanal-forming)	glycerol hydro-lyase (3-hydroxypropanal-forming)	Glycerol <=> 3-Hydroxypropanal + H2O	C00116 <=> C00969 + C00001	KEGG	4.2.1.30	4.2.1.30
R01048	Glycerol hydro-lyase	Glycerol hydro-lyase	Glycerol <=> Lactaldehyde + H2O	C00116 <=> C05999 + C00001	KEGG	4.2.1.30	4.2.1.30
R01049	ATP:D-ribose-5-phosphate diphosphotransferase	ATP:D-ribose-5-phosphate diphosphotransferase	ATP + D-Ribose 5-phosphate <=> AMP + 5-Phospho-alpha-D-ribose 1-diphosphate	C00002 + C00117 <=> C00020 + C00119	KEGG	2.7.6.1	2.7.6.1
R01050	ATP:D-ribose-5-phosphate 1-phosphotransferase	ATP:D-ribose-5-phosphate 1-phosphotransferase	ATP + D-Ribose 5-phosphate <=> ADP + D-Ribose 1,5-bisphosphate	C00002 + C00117 <=> C00008 + C01151	KEGG	2.7.1.18	2.7.1.18
R01051	ATP:D-ribose 5-phosphotransferase	ATP:D-ribose 5-phosphotransferase	ATP + D-Ribose <=> ADP + D-Ribose 5-phosphate	C00002 + C00121 <=> C00008 + C00117	KEGG	2.7.1.15	2.7.1.15
R01052	ADP:D-ribose-5-phosphate adenylyltransferase	ADP:D-ribose-5-phosphate adenylyltransferase	ADP + D-Ribose 5-phosphate <=> Orthophosphate + ADP-ribose	C00008 + C00117 <=> C00009 + C00301	KEGG	2.7.7.35	2.7.7.35
R01053	Ribose-5-phosphate:ammonia ligase (ADP-forming)	Ribose-5-phosphate:ammonia ligase (ADP-forming)	ATP + D-Ribose 5-phosphate + NH3 <=> ADP + Orthophosphate + 5-Phosphoribosylamine	C00002 + C00117 + C00014 <=> C00008 + C00009 + C03090	KEGG	6.3.4.7	6.3.4.7
R01054	ADP-ribose ribophosphohydrolase	ADP-ribose ribophosphohydrolase	ADP-ribose + H2O <=> AMP + D-Ribose 5-phosphate	C00301 + C00001 <=> C00020 + C00117	KEGG	3.6.1.13，3.6.1.21，3.6.1.-	3.6.1.13
R01055	uracil hydro-lyase (adding D-ribose 5-phosphate;pseudouridine-5'-phosphate-forming)	uracil hydro-lyase (adding D-ribose 5-phosphate;pseudouridine-5'-phosphate-forming)	Uracil + D-Ribose 5-phosphate <=> Pseudouridine 5'-phosphate + H2O	C00106 + C00117 <=> C01168 + C00001	KEGG	4.2.1.70	4.2.1.70
R01056	D-ribose-5-phosphate aldose-ketose-isomerase	D-ribose-5-phosphate aldose-ketose-isomerase	D-Ribose 5-phosphate <=> D-Ribulose 5-phosphate	C00117 <=> C00199	KEGG	5.3.1.6	5.3.1.6
R01057	D-Ribose 1,5-phosphomutase	D-Ribose 1,5-phosphomutase	alpha-D-Ribose 1-phosphate <=> D-Ribose 5-phosphate	C00620 <=> C00117	KEGG	5.4.2.2，5.4.2.7	5.4.2.2
R01058	D-glyceraldehyde 3-phosphate:NADP+ oxidoreductase	D-glyceraldehyde 3-phosphate:NADP+ oxidoreductase	D-Glyceraldehyde 3-phosphate + NADP+ + H2O <=> 3-Phospho-D-glycerate + NADPH + H+	C00118 + C00006 + C00001 <=> C00197 + C00005 + C00080	KEGG	1.2.1.9	1.2.1.9
R01059	ATP:D-glyceraldehyde 3-phosphotransferase	ATP:D-glyceraldehyde 3-phosphotransferase	ATP + D-Glyceraldehyde <=> ADP + D-Glyceraldehyde 3-phosphate	C00002 + C00577 <=> C00008 + C00118	KEGG	2.7.1.28	2.7.1.28
R01061	D-glyceraldehyde-3-phosphate:NAD+ oxidoreductase (phosphorylating)	D-glyceraldehyde-3-phosphate:NAD+ oxidoreductase (phosphorylating)	D-Glyceraldehyde 3-phosphate + Orthophosphate + NAD+ <=> 3-Phospho-D-glyceroyl phosphate + NADH + H+	C00118 + C00009 + C00003 <=> C00236 + C00004 + C00080	KEGG	1.2.1.12，1.2.1.59	1.2.1.12
R01063	D-glyceraldehyde-3-phosphate:NADP+ oxidoreductase (phosphorylating)	D-glyceraldehyde-3-phosphate:NADP+ oxidoreductase (phosphorylating)	D-Glyceraldehyde 3-phosphate + Orthophosphate + NADP+ <=> 3-Phospho-D-glyceroyl phosphate + NADPH + H+	C00118 + C00009 + C00006 <=> C00236 + C00005 + C00080	KEGG	1.2.1.13，1.2.1.59	1.2.1.13
R01064	2-dehydro-3-deoxy-D-galactonate-6-phosphate D-glyceraldehyde-3-phosphate-lyase (pyruvate-forming)	2-dehydro-3-deoxy-D-galactonate-6-phosphate D-glyceraldehyde-3-phosphate-lyase (pyruvate-forming)	2-Dehydro-3-deoxy-D-galactonate 6-phosphate <=> Pyruvate + D-Glyceraldehyde 3-phosphate	C01286 <=> C00022 + C00118	KEGG	4.1.2.21	4.1.2.21
R01066	2-deoxy-D-ribose-5-phosphate acetaldehyde-lyase (D-glyceraldehyde-3-phosphate-forming)	2-deoxy-D-ribose-5-phosphate acetaldehyde-lyase (D-glyceraldehyde-3-phosphate-forming)	2-Deoxy-D-ribose 5-phosphate <=> D-Glyceraldehyde 3-phosphate + Acetaldehyde	C00673 <=> C00118 + C00084	KEGG	4.1.2.4	4.1.2.4
R01067	D-Fructose 6-phosphate:D-glyceraldehyde-3-phosphate glycolaldehyde transferase	D-Fructose 6-phosphate:D-glyceraldehyde-3-phosphate glycolaldehyde transferase	D-Fructose 6-phosphate + D-Glyceraldehyde 3-phosphate <=> D-Erythrose 4-phosphate + D-Xylulose 5-phosphate	C00085 + C00118 <=> C00279 + C00231	KEGG	2.2.1.1	2.2.1.1
R01068	D-fructose-1,6-bisphosphate D-glyceraldehyde-3-phosphate-lyase (glycerone-phosphate-forming)	D-fructose-1,6-bisphosphate D-glyceraldehyde-3-phosphate-lyase (glycerone-phosphate-forming)	D-Fructose 1,6-bisphosphate <=> Glycerone phosphate + D-Glyceraldehyde 3-phosphate	C00354 <=> C00111 + C00118	KEGG	4.1.2.13	4.1.2.13
R01069	D-tagatose 1,6-bisphosphate D-glyceraldehyde-3-phosphate-lyase (glycerone-phosphate-forming)	D-tagatose 1,6-bisphosphate D-glyceraldehyde-3-phosphate-lyase (glycerone-phosphate-forming)	D-Tagatose 1,6-bisphosphate <=> Glycerone phosphate + D-Glyceraldehyde 3-phosphate	C03785 <=> C00111 + C00118	KEGG	4.1.2.40	4.1.2.40
R01070	beta-D-fructose-1,6-bisphosphate D-glyceraldehyde-3-phosphate-lyase (glycerone-phosphate-forming)	beta-D-fructose-1,6-bisphosphate D-glyceraldehyde-3-phosphate-lyase (glycerone-phosphate-forming)	beta-D-Fructose 1,6-bisphosphate <=> Glycerone phosphate + D-Glyceraldehyde 3-phosphate	C05378 <=> C00111 + C00118	KEGG	4.1.2.13	4.1.2.13
R01071	1-(5-phospho-D-ribosyl)-ATP:diphosphate phospho-alpha-D-ribosyl-transferase	1-(5-phospho-D-ribosyl)-ATP:diphosphate phospho-alpha-D-ribosyl-transferase	1-(5-Phospho-D-ribosyl)-ATP + Diphosphate <=> ATP + 5-Phospho-alpha-D-ribose 1-diphosphate	C02739 + C00013 <=> C00002 + C00119	KEGG	2.4.2.17	2.4.2.17
R01072	5-phosphoribosylamine:diphosphate phospho-alpha-D-ribosyltransferase (glutamate-amidating)	5-phosphoribosylamine:diphosphate phospho-alpha-D-ribosyltransferase (glutamate-amidating)	5-Phosphoribosylamine + Diphosphate + L-Glutamate <=> L-Glutamine + 5-Phospho-alpha-D-ribose 1-diphosphate + H2O	C03090 + C00013 + C00025 <=> C00064 + C00119 + C00001	KEGG	2.4.2.14	2.4.2.14
R01073	N-(5-Phospho-D-ribosyl)anthranilate:pyrophosphate phosphoribosyl-transferase	N-(5-Phospho-D-ribosyl)anthranilate:pyrophosphate phosphoribosyl-transferase	N-(5-Phospho-D-ribosyl)anthranilate + Diphosphate <=> Anthranilate + 5-Phospho-alpha-D-ribose 1-diphosphate	C04302 + C00013 <=> C00108 + C00119	KEGG	2.4.2.18	2.4.2.18
R01074	biotin:CoA ligase (AMP-forming); ATP:biotin adenylyltransferase	biotin:CoA ligase (AMP-forming)	ATP + Biotin <=> Diphosphate + Biotinyl-5'-AMP	C00002 + C00120 <=> C00013 + C05921	KEGG	6.2.1.11，6.3.4.9，6.3.4.10，6.3.4.11，6.3.4.15	6.2.1.11
R01075	biotin:CoA ligase (AMP-forming)	biotin:CoA ligase (AMP-forming)	ATP + Biotin + CoA <=> AMP + Diphosphate + Biotinyl-CoA	C00002 + C00120 + C00010 <=> C00020 + C00013 + C01894	KEGG	6.2.1.11	6.2.1.11
R01076	Biotin-amide amidohydrolase	Biotin-amide amidohydrolase	Biotin amide + H2O <=> Biotin + NH3	C01893 + C00001 <=> C00120 + C00014	KEGG	3.5.1.12	3.5.1.12
R01077	N6-D-Biotinyl-L-lysine amidohydrolase	N6-D-Biotinyl-L-lysine amidohydrolase	Biocytin + H2O <=> Biotin + L-Lysine	C05552 + C00001 <=> C00120 + C00047	KEGG	3.5.1.12	3.5.1.12
R01078	dethiobiotin:sulfur sulfurtransferase	dethiobiotin:sulfur sulfurtransferase	Dethiobiotin + Sulfur donor + 2 S-Adenosyl-L-methionine + 2 e- + 2 H+ <=> Biotin + 2 L-Methionine + 2 5'-Deoxyadenosine	C01909 + C17023 + 2 C00019 + 2 C05359 + 2 C00080 <=> C00120 + 2 C00073 + 2 C05198	KEGG	2.8.1.6	2.8.1.6
R01079	D-Ribose:NADP+ 1-oxidoreductase	D-Ribose:NADP+ 1-oxidoreductase	D-Ribose + NADP+ + H2O <=> D-Ribonate + NADPH + H+	C00121 + C00006 + C00001 <=> C01685 + C00005 + C00080	KEGG	1.1.1.115	1.1.1.115
R01080	Uridine ribohydrolase	Uridine ribohydrolase	Uridine + H2O <=> Uracil + D-Ribose	C00299 + C00001 <=> C00106 + C00121	KEGG	3.2.2.3	3.2.2.3
R01081	D-ribose aldose-ketose-isomerase	D-ribose aldose-ketose-isomerase	D-Ribose <=> D-Ribulose	C00121 <=> C00309	KEGG	5.3.1.20	5.3.1.20
R01082	(S)-malate hydro-lyase (fumarate-forming)	(S)-malate hydro-lyase (fumarate-forming)	(S)-Malate <=> Fumarate + H2O	C00149 <=> C00122 + C00001	KEGG	4.2.1.2	4.2.1.2
R01083	N6-(1,2-dicarboxyethyl)AMP AMP-lyase (fumarate-forming)	N6-(1,2-dicarboxyethyl)AMP AMP-lyase (fumarate-forming)	N6-(1,2-Dicarboxyethyl)-AMP <=> Fumarate + AMP	C03794 <=> C00122 + C00020	KEGG	4.3.2.2	4.3.2.2
R01085	3-fumarylpyruvate fumarylhydrolase	3-fumarylpyruvate fumarylhydrolase	3-Fumarylpyruvate + H2O <=> Fumarate + Pyruvate	C02514 + C00001 <=> C00122 + C00022	KEGG	3.7.1.5	3.7.1.5
R01086	2-(Nomega-L-arginino)succinate arginine-lyase (fumarate-forming)	2-(Nomega-L-arginino)succinate arginine-lyase (fumarate-forming)	N-(L-Arginino)succinate <=> Fumarate + L-Arginine	C03406 <=> C00122 + C00062	KEGG	4.3.2.1	4.3.2.1
R01087	Maleate cis-trans-isomerase	Maleate cis-trans-isomerase	Maleic acid <=> Fumarate	C01384 <=> C00122	KEGG	5.2.1.1	5.2.1.1
R01088	L-leucine:NAD+ oxidoreductase (deaminating)	L-leucine:NAD+ oxidoreductase (deaminating)	L-Leucine + H2O + NAD+ <=> 4-Methyl-2-oxopentanoate + NH3 + NADH + H+	C00123 + C00001 + C00003 <=> C00233 + C00014 + C00004 + C00080	KEGG	1.4.1.9	1.4.1.9
R01089	Acetyl-CoA:L-leucine N-acetyltransferase	Acetyl-CoA:L-leucine N-acetyltransferase	Acetyl-CoA + L-Leucine <=> CoA + N-Acetyl-L-leucine	C00024 + C00123 <=> C00010 + C02710	KEGG	2.3.1.66	2.3.1.66
R01090	L-Leucine:2-oxoglutarate aminotransferase	L-Leucine:2-oxoglutarate aminotransferase	L-Leucine + 2-Oxoglutarate <=> 4-Methyl-2-oxopentanoate + L-Glutamate	C00123 + C00026 <=> C00233 + C00025	KEGG	2.6.1.6，2.6.1.42，2.6.1.67	2.6.1.6
R01091	(2S)-alpha-leucine 2,3-aminomutase	(2S)-alpha-leucine 2,3-aminomutase	L-Leucine <=> (3R)-beta-Leucine	C00123 <=> C02486	KEGG	5.4.3.7	5.4.3.7
R01092	ATP:D-galactose 1-phosphotransferase	ATP:D-galactose 1-phosphotransferase	ATP + D-Galactose <=> ADP + alpha-D-Galactose 1-phosphate	C00002 + C00124 <=> C00008 + C00446	KEGG	2.7.1.6	2.7.1.6
R01093	galactitol:NAD+ 1-oxidoreductase	galactitol:NAD+ 1-oxidoreductase	D-Galactose + NADH + H+ <=> Galactitol + NAD+	C00124 + C00004 + C00080 <=> C01697 + C00003	KEGG	1.1.1.21	1.1.1.21
R01094	D-Galactose:NAD+ 1-oxidoreductase	D-Galactose:NAD+ 1-oxidoreductase	D-Galactose + NAD+ <=> D-Galactono-1,4-lactone + NADH + H+	C00124 + C00003 <=> C03383 + C00004 + C00080	KEGG	1.1.1.48	1.1.1.48
R01095	galactitol:NADP+ 1-oxidoreductase	galactitol:NADP+ 1-oxidoreductase	D-Galactose + NADPH + H+ <=> Galactitol + NADP+	C00124 + C00005 + C00080 <=> C01697 + C00006	KEGG	1.1.1.21	1.1.1.21
R01096	D-Galactose:NADP+ 1-oxidoreductase	D-Galactose:NADP+ 1-oxidoreductase	D-Galactose + NADP+ <=> D-Galactono-1,5-lactone + NADPH + H+	C00124 + C00006 <=> C02669 + C00005 + C00080	KEGG	1.1.1.48，1.1.1.120	1.1.1.48
R01097	D-Galactose:NADP+ 1-oxidoreductase	D-Galactose:NADP+ 1-oxidoreductase	D-Galactose + NADP+ <=> D-Galactono-1,4-lactone + NADPH + H+	C00124 + C00006 <=> C03383 + C00005 + C00080	KEGG	1.1.1.48，1.1.1.120	1.1.1.48
R01098	D-Galactose:oxygen 6-oxidoreductase	D-Galactose:oxygen 6-oxidoreductase	D-Galactose + Oxygen + H2O <=> D-Galactonate + Hydrogen peroxide	C00124 + C00007 + C00001 <=> C00880 + C00027	KEGG	1.1.3.9	1.1.3.9
R01099	D-Galactose:oxygen 6-oxidoreductase	D-Galactose:oxygen 6-oxidoreductase	D-Galactose + Oxygen <=> D-galacto-Hexodialdose + Hydrogen peroxide	C00124 + C00007 <=> C03269 + C00027	KEGG	1.1.3.9	1.1.3.9
R01100	Lactose galactohydrolase	Lactose galactohydrolase	Lactose + H2O <=> D-Glucose + D-Galactose	C00243 + C00001 <=> C00031 + C00124	KEGG	3.2.1.23，3.2.1.108	3.2.1.23
R01101	melibiose galactohydrolase	melibiose galactohydrolase	Melibiose + H2O <=> D-Galactose + D-Glucose	C05402 + C00001 <=> C00124 + C00031	KEGG	3.2.1.22	3.2.1.22
R01103	Raffinose galactohydrolase	Raffinose galactohydrolase	Raffinose + H2O <=> D-Galactose + Sucrose	C00492 + C00001 <=> C00124 + C00089	KEGG	3.2.1.22	3.2.1.22
R01104	Galactosylglycerol galactohydrolase	Galactosylglycerol galactohydrolase	3-beta-D-Galactosyl-sn-glycerol + H2O <=> D-Galactose + Glycerol	C05401 + C00001 <=> C00124 + C00116	KEGG	3.2.1.22	3.2.1.22
R01105	Galactan galactohydrolase	Galactan galactohydrolase	Galactan + H2O <=> D-Galactose + Galactan	C05796 + C00001 <=> C00124 + C05796	KEGG	3.2.1.23	3.2.1.23
R01106	nitrite:(acceptor) oxidoreductase	nitrite:(acceptor) oxidoreductase	2 Ferricytochrome c + Nitrite + H2O <=> Nitrate + 2 Ferrocytochrome c + 2 H+	2 C00125 + C00088 + C00001 <=> C00244 + 2 C00126 + 2 C00080	KEGG	1.7.99.4	1.7.99.4
R01108	glutathione:dehydroascorbate oxidoreductase	glutathione:dehydroascorbate oxidoreductase	Dehydroascorbate + 2 Glutathione <=> Glutathione disulfide + Ascorbate	C05422 + 2 C00051 <=> C00127 + C00072	KEGG	1.8.5.1	1.8.5.1
R01109	Glutathione:cystine oxidoreductase	Glutathione:cystine oxidoreductase	Cystine + 2 Glutathione <=> Glutathione disulfide + 2 Cysteine	C01420 + 2 C00051 <=> C00127 + 2 C00736	KEGG	1.8.4.4	1.8.4.4
R01110	glutathione:homocystine oxidoreductase	glutathione:homocystine oxidoreductase	Homocystine + 2 Glutathione <=> Glutathione disulfide + 2 Homocysteine	C01817 + 2 C00051 <=> C00127 + 2 C05330	KEGG	1.8.4.1	1.8.4.1
R01111	coenzyme A:glutathione-disulfide oxidoreductase	coenzyme A:glutathione-disulfide oxidoreductase	CoA + Glutathione disulfide <=> CoA-glutathione + Glutathione	C00010 + C00127 <=> C00920 + C00051	KEGG	1.8.4.3	1.8.4.3
R01113	Glutathione:L-cystine oxidoreductase	Glutathione:L-cystine oxidoreductase	L-Cystine + 2 Glutathione <=> Glutathione disulfide + 2 L-Cysteine	C00491 + 2 C00051 <=> C00127 + 2 C00097	KEGG	1.8.4.4	1.8.4.4
R01115	CMP-N-acetylneuraminate,ferrocytochrome-b5:oxygen oxidoreductase (N-acetyl-hydroxylating)	CMP-N-acetylneuraminate,ferrocytochrome-b5:oxygen oxidoreductase (N-acetyl-hydroxylating)	CMP-N-acetylneuraminate + 2 Ferrocytochrome b5 + Oxygen + 2 H+ <=> CMP-N-glycoloylneuraminate + 2 Ferricytochrome b5 + H2O	C00128 + 2 C00999 + C00007 + 2 C00080 <=> C03691 + 2 C00996 + C00001	KEGG	1.14.18.2	1.14.18.2
R01117	CTP:N-acetylneuraminate cytidylyltransferase	CTP:N-acetylneuraminate cytidylyltransferase	CTP + N-Acetylneuraminate <=> Diphosphate + CMP-N-acetylneuraminate	C00063 + C00270 <=> C00013 + C00128	KEGG	2.7.7.43	2.7.7.43
R01119	NO NAME	NO NAME	CMP-N-acetylneuraminate <=> Colominic acid(non-reducing N- or O-acylneuraminyl residue)	C00128 <=> C04799	KEGG
R01120	NO NAME	NO NAME	CMP-N-acetylneuraminate <=> Glycolipid	C00128 <=> C05005	KEGG
R01121	ATP:(R)-5-diphosphomevalonate carboxy-lyase (adding ATP; isopentenyl-diphosphate-forming); ATP:(R)-5-diphosphomevalonate carboxy-lyase (dehydrating)	ATP:(R)-5-diphosphomevalonate carboxy-lyase (dehydrating)	ATP + (R)-5-Diphosphomevalonate <=> ADP + Orthophosphate + Isopentenyl diphosphate + CO2	C00002 + C01143 <=> C00008 + C00009 + C00129 + C00011	KEGG	4.1.1.33	4.1.1.33
R01122	delta2-isopentenyl-diphosphate:tRNA isopentenyltransferase	delta2-isopentenyl-diphosphate:tRNA isopentenyltransferase	Dimethylallyl diphosphate + tRNA <=> Diphosphate + tRNA containing 6-isopentenyladenosine	C00235 + C00066 <=> C00013 + C04432	KEGG	2.5.1.75	2.5.1.75
R01123	Isopentenyl-diphosphate delta3-delta2-isomerase	Isopentenyl-diphosphate delta3-delta2-isomerase	Isopentenyl diphosphate <=> Dimethylallyl diphosphate	C00129 <=> C00235	KEGG	5.3.3.2	5.3.3.2
R01126	Inosine 5'-monophosphate phosphohydrolase	Inosine 5'-monophosphate phosphohydrolase	IMP + H2O <=> Inosine + Orthophosphate	C00130 + C00001 <=> C00294 + C00009	KEGG	3.1.3.5	3.1.3.5
R01127	IMP 1,2-hydrolase (decyclizing)	IMP 1,2-hydrolase (decyclizing)	IMP + H2O <=> 1-(5'-Phosphoribosyl)-5-formamido-4-imidazolecarboxamide	C00130 + C00001 <=> C04734	KEGG	2.1.2.3，3.5.4.10	2.1.2.3
R01128	5'-Inosinate phosphoribohydrolase	5'-Inosinate phosphoribohydrolase	IMP + H2O <=> Hypoxanthine + D-Ribose 5-phosphate	C00130 + C00001 <=> C00262 + C00117	KEGG	3.2.2.12	3.2.2.12
R01130	IMP:NAD+ oxidoreductase	IMP:NAD+ oxidoreductase	IMP + NAD+ + H2O <=> Xanthosine 5'-phosphate + NADH + H+	C00130 + C00003 + C00001 <=> C00655 + C00004 + C00080	KEGG	1.1.1.205	1.1.1.205
R01131	ATP:inosine 5'-phosphotransferase	ATP:inosine 5'-phosphotransferase	ATP + Inosine <=> ADP + IMP	C00002 + C00294 <=> C00008 + C00130	KEGG	2.7.1.73	2.7.1.73
R01132	IMP:diphosphate phospho-D-ribosyltransferase	IMP:diphosphate phospho-D-ribosyltransferase	IMP + Diphosphate <=> Hypoxanthine + 5-Phospho-alpha-D-ribose 1-diphosphate	C00130 + C00013 <=> C00262 + C00119	KEGG	2.4.2.8	2.4.2.8
R01134	inosine-5'-phosphate:NADP+ oxidoreductase (aminating); NADH:guanosine-5'-phosphate oxidoreductase (deaminating)	inosine-5'-phosphate:NADP+ oxidoreductase (aminating);	IMP + NH3 + NADP+ <=> GMP + NADPH + H+	C00130 + C00014 + C00006 <=> C00144 + C00005 + C00080	KEGG	1.7.1.7	1.7.1.7
R01135	IMP:L-aspartate ligase (GDP-forming)	IMP:L-aspartate ligase (GDP-forming)	GTP + IMP + L-Aspartate <=> GDP + Orthophosphate + N6-(1,2-Dicarboxyethyl)-AMP	C00044 + C00130 + C00049 <=> C00035 + C00009 + C03794	KEGG	6.3.4.4	6.3.4.4
R01137	ATP:dADP phosphotransferase	ATP:dADP phosphotransferase	ATP + dADP <=> ADP + dATP	C00002 + C00206 <=> C00008 + C00131	KEGG	2.7.4.6	2.7.4.6
R01138	dATP:pyruvate 2-O-phosphotransferase	dATP:pyruvate 2-O-phosphotransferase	dATP + Pyruvate <=> dADP + Phosphoenolpyruvate	C00131 + C00022 <=> C00206 + C00074	KEGG	2.7.1.40	2.7.1.40
R01139	dATP:D-glucose 6-phosphotransferase	dATP:D-glucose 6-phosphotransferase	dATP + D-Glucose <=> dADP + D-Glucose 6-phosphate	C00131 + C00031 <=> C00206 + C00092	KEGG	2.7.1.1	2.7.1.1
R01140	dATP:D-fructose 6-phosphotransferase	dATP:D-fructose 6-phosphotransferase	dATP + D-Fructose <=> dADP + D-Fructose 6-phosphate	C00131 + C00095 <=> C00206 + C00085	KEGG	2.7.1.1	2.7.1.1
R01142	Methane,NADH:oxygen oxidoreductase (hydroxylating)	Methane,NADH:oxygen oxidoreductase (hydroxylating)	Methane + Oxygen + NADH + H+ <=> Methanol + NAD+ + H2O	C01438 + C00007 + C00004 + C00080 <=> C00132 + C00003 + C00001	KEGG	1.14.13.25	1.14.13.25
R01143	methane,NADPH:oxygen oxidoreductase (hydroxylating)	methane,NADPH:oxygen oxidoreductase (hydroxylating)	Methane + Oxygen + NADPH + H+ <=> Methanol + NADP+ + H2O	C01438 + C00007 + C00005 + C00080 <=> C00132 + C00006 + C00001	KEGG	1.14.13.25	1.14.13.25
R01144	Oxaloacetate-4-methyl-ester oxaloacetohydrolase	Oxaloacetate-4-methyl-ester oxaloacetohydrolase	Oxaloacetate 4-methyl ester + H2O <=> Oxaloacetate + Methanol	C03716 + C00001 <=> C00036 + C00132	KEGG	3.1.1.44	3.1.1.44
R01145	Monomethyl-sulfate sulfohydrolase	Monomethyl-sulfate sulfohydrolase	Monomethyl sulfate + H2O <=> Methanol + Sulfate	C02704 + C00001 <=> C00132 + C00059	KEGG	3.1.6.16	3.1.6.16
R01146	methanol:ferricytochrome-c oxidoreductase; methanol dehydrogenase	methanol dehydrogenase	Methanol + 2 Ferricytochrome c <=> Formaldehyde + 2 Ferrocytochrome c + 2 H+	C00132 + 2 C00125 <=> C00067 + 2 C00126 + 2 C00080	KEGG	1.1.2.7	1.1.2.7
R01147	Pyridoxamine-5'-phosphate:2-oxoglutarate aminotransferase	Pyridoxamine-5'-phosphate:2-oxoglutarate aminotransferase	Pyridoxamine phosphate + Pyruvate <=> Pyridoxal phosphate + D-Alanine	C00647 + C00022 <=> C00018 + C00133	KEGG	2.6.1.54	2.6.1.54
R01148	D-Alanine:2-oxoglutarate aminotransferase	D-Alanine:2-oxoglutarate aminotransferase	D-Alanine + 2-Oxoglutarate <=> Pyruvate + D-Glutamate	C00133 + C00026 <=> C00022 + C00217	KEGG	2.6.1.21	2.6.1.21
R01149	L-Glutamine:D-alanine gamma-glutamyltransferase	L-Glutamine:D-alanine gamma-glutamyltransferase	D-Alanine + L-Glutamine <=> NH3 + gamma-L-Glutamyl-D-alanine	C00133 + C00064 <=> C00014 + C03738	KEGG	2.3.2.14	2.3.2.14
R01150	D-alanine:D-alanine ligase (ADP-forming)	D-alanine:D-alanine ligase (ADP-forming)	ATP + 2 D-Alanine <=> ADP + Orthophosphate + D-Alanyl-D-alanine	C00002 + 2 C00133 <=> C00008 + C00009 + C00993	KEGG	6.3.2.4	6.3.2.4
R01151	Putrescine:oxygen oxidoreductase (deaminating)	Putrescine:oxygen oxidoreductase (deaminating)	Putrescine + Oxygen + H2O <=> 4-Aminobutyraldehyde + NH3 + Hydrogen peroxide	C00134 + C00007 + C00001 <=> C00555 + C00014 + C00027	KEGG	1.4.3.10，1.4.3.22	1.4.3.10
R01152	N-Carbamoylputrescine amidohydrolase	N-Carbamoylputrescine amidohydrolase	N-Carbamoylputrescine + H2O <=> Putrescine + CO2 + NH3	C00436 + C00001 <=> C00134 + C00011 + C00014	KEGG	3.5.1.53	3.5.1.53
R01153	S-Adenosyl-L-methionine:putrescine N-methyltransferase	S-Adenosyl-L-methionine:putrescine N-methyltransferase	S-Adenosyl-L-methionine + Putrescine <=> S-Adenosyl-L-homocysteine + N-Methylputrescine	C00019 + C00134 <=> C00021 + C02723	KEGG	2.1.1.53	2.1.1.53
R01154	acetyl-CoA:putrescine N-acetyltransferase	acetyl-CoA:putrescine N-acetyltransferase	Acetyl-CoA + Putrescine <=> CoA + N-Acetylputrescine	C00024 + C00134 <=> C00010 + C02714	KEGG	2.3.1.57	2.3.1.57
R01155	putrescine:2-oxoglutarate aminotransferase	putrescine:2-oxoglutarate aminotransferase	Putrescine + 2-Oxoglutarate <=> 4-Aminobutyraldehyde + L-Glutamate	C00134 + C00026 <=> C00555 + C00025	KEGG	2.6.1.29，2.6.1.82	2.6.1.29
R01156	N-Acetylputrescine acetylhydrolase	N-Acetylputrescine acetylhydrolase	N-Acetylputrescine + H2O <=> Acetate + Putrescine	C02714 + C00001 <=> C00033 + C00134	KEGG	3.5.1.62	3.5.1.62
R01157	Agmatine amidinohydrolase	Agmatine amidinohydrolase	Agmatine + H2O <=> Putrescine + Urea	C00179 + C00001 <=> C00134 + C00086	KEGG	3.5.3.11	3.5.3.11
R01158	L-Histidinol:NAD+ oxidoreductase	L-Histidinol:NAD+ oxidoreductase	L-Histidinol + 2 NAD+ + H2O <=> L-Histidine + 2 NADH + 2 H+	C00860 + 2 C00003 + C00001 <=> C00135 + 2 C00004 + 2 C00080	KEGG	1.1.1.23	1.1.1.23
R01159	S-adenosyl-L-methionine:L-histidine N-methyltransferase	S-adenosyl-L-methionine:L-histidine N-methyltransferase	L-Histidine + S-Adenosyl-L-methionine <=> N(pi)-Methyl-L-histidine + S-Adenosyl-L-homocysteine	C00135 + C00019 <=> C01152 + C00021	KEGG	2.1.1.-	2.1.1.-
R01160	acetyl-CoA:L-histidine N-acetyltransferase	acetyl-CoA:L-histidine N-acetyltransferase	Acetyl-CoA + L-Histidine <=> CoA + N-Acetyl-L-histidine	C00024 + C00135 <=> C00010 + C02997	KEGG	2.3.1.33	2.3.1.33
R01161	L-histidine:2-oxoglutarate aminotransferase	L-histidine:2-oxoglutarate aminotransferase	L-Histidine + 2-Oxoglutarate <=> Imidazol-5-yl-pyruvate + L-Glutamate	C00135 + C00026 <=> C03277 + C00025	KEGG	2.6.1.38	2.6.1.38
R01163	L-histidinal:NAD+ oxidoreductase	L-histidinal:NAD+ oxidoreductase	L-Histidinal + H2O + NAD+ <=> L-Histidine + NADH + H+	C01929 + C00001 + C00003 <=> C00135 + C00004 + C00080	KEGG	1.1.1.23	1.1.1.23
R01164	L-histidine:beta-alanine ligase (AMP-forming)	L-histidine:beta-alanine ligase (AMP-forming)	ATP + L-Histidine + beta-Alanine <=> AMP + Diphosphate + Carnosine	C00002 + C00135 + C00099 <=> C00020 + C00013 + C00386	KEGG	6.3.2.11	6.3.2.11
R01166	Nalpha-(beta-alanyl)-L-histidine hydrolase	Nalpha-(beta-alanyl)-L-histidine hydrolase	Carnosine + H2O <=> beta-Alanine + L-Histidine	C00386 + C00001 <=> C00099 + C00135	KEGG	3.4.13.3，3.4.13.20	3.4.13.3
R01167	L-histidine carboxy-lyase (histamine-forming)	L-histidine carboxy-lyase (histamine-forming)	L-Histidine <=> 1H-Imidazole-4-ethanamine + CO2	C00135 <=> C00388 + C00011	KEGG	4.1.1.22，4.1.1.28	4.1.1.22
R01168	L-histidine ammonia-lyase (urocanate-forming)	L-histidine ammonia-lyase (urocanate-forming)	L-Histidine <=> Urocanate + NH3	C00135 <=> C00785 + C00014	KEGG	4.3.1.3	4.3.1.3
R01169	S-adenosyl-L-methionine:L-histidine Nalpha-methyltransferase	S-adenosyl-L-methionine:L-histidine Nalpha-methyltransferase	L-Histidine + 3 S-Adenosyl-L-methionine + H+ <=> Hercynine + 3 S-Adenosyl-L-homocysteine	C00135 + 3 C00019 + C00080 <=> C05575 + 3 C00021	KEGG	2.1.1.44	2.1.1.44
R01171	Butanoyl-CoA:(acceptor) 2,3-oxidoreductase; Butanoyl-CoA:NAD+ trans-2-oxidoreductase	Butanoyl-CoA:(acceptor) 2,3-oxidoreductase	Butanoyl-CoA + NAD+ <=> Crotonoyl-CoA + NADH + H+	C00136 + C00003 <=> C00877 + C00004 + C00080	KEGG	1.3.1.44，1.3.99.2	1.3.1.44
R01172	butanal:NAD+ oxidoreductase (CoA-acylating)	butanal:NAD+ oxidoreductase (CoA-acylating)	Butanal + CoA + NAD+ <=> Butanoyl-CoA + NADH + H+	C01412 + C00010 + C00003 <=> C00136 + C00004 + C00080	KEGG	1.2.1.10，1.2.1.57	1.2.1.10
R01173	butanal:NADP+ oxidoreductase (CoA-acylating)	butanal:NADP+ oxidoreductase (CoA-acylating)	Butanal + CoA + NADP+ <=> Butanoyl-CoA + NADPH + H+	C01412 + C00010 + C00006 <=> C00136 + C00005 + C00080	KEGG	1.2.1.57	1.2.1.57
R01174	butanoyl-CoA:phosphate butanoyltransferase	butanoyl-CoA:phosphate butanoyltransferase	Butanoyl-CoA + Orthophosphate <=> CoA + Butanoylphosphate	C00136 + C00009 <=> C00010 + C02527	KEGG	2.3.1.19	2.3.1.19
R01175	Butanoyl-CoA:oxygen 2-oxidoreductase	Butanoyl-CoA:oxygen 2-oxidoreductase	Butanoyl-CoA + FAD <=> FADH2 + Crotonoyl-CoA	C00136 + C00016 <=> C01352 + C00877	KEGG	1.3.3.6，1.3.99.2，1.3.99.3，1.3.99.-	1.3.3.6
R01176	Butanoate:CoA ligase (AMP-forming)	Butanoate:CoA ligase (AMP-forming)	ATP + Butanoic acid + CoA <=> AMP + Diphosphate + Butanoyl-CoA	C00002 + C00246 + C00010 <=> C00020 + C00013 + C00136	KEGG	6.2.1.2	6.2.1.2
R01177	butanoyl-CoA:acetyl-CoA C-butanoyltransferase	butanoyl-CoA:acetyl-CoA C-butanoyltransferase	Acetyl-CoA + Butanoyl-CoA <=> CoA + 3-Oxohexanoyl-CoA	C00024 + C00136 <=> C00010 + C05269	KEGG	2.3.1.9，2.3.1.16	2.3.1.9
R01178	butanoyl-CoA:acceptor 2,3-oxidoreductase	butanoyl-CoA:acceptor 2,3-oxidoreductase	Butanoyl-CoA + Acceptor <=> Crotonoyl-CoA + Reduced acceptor	C00136 + C00028 <=> C00877 + C00030	KEGG	1.3.99.2	1.3.99.2
R01179	Butanoyl-CoA:acetate CoA-transferase	Butanoyl-CoA:acetate CoA-transferase	Butanoyl-CoA + Acetate <=> Butanoic acid + Acetyl-CoA	C00136 + C00033 <=> C00246 + C00024	KEGG	2.8.3.8	2.8.3.8
R01180	butanoyl-CoA:glyoxylate C-butanoyltransferase (thioester-hydrolysing, 1-carboxypropyl-forming); 3-Ethylmalate glyoxylate-lyase (CoA-butanoylating)	3-Ethylmalate glyoxylate-lyase (CoA-butanoylating)	3-Ethylmalate + CoA <=> Butanoyl-CoA + H2O + Glyoxylate	C01989 + C00010 <=> C00136 + C00001 + C00048	KEGG	2.3.3.7	2.3.3.7
R01181	2-Methylpropanoyl-CoA CoA-carbonylmutase	2-Methylpropanoyl-CoA CoA-carbonylmutase	2-Methylpropanoyl-CoA <=> Butanoyl-CoA	C00630 <=> C00136	KEGG	5.4.99.13	5.4.99.13
R01182	ATP:myo-inositol 1-phosphotransferase	ATP:myo-inositol 1-phosphotransferase	ATP + myo-Inositol <=> ADP + Inositol 1-phosphate	C00002 + C00137 <=> C00008 + C01177	KEGG	2.7.1.64	2.7.1.64
R01183	myo-Inositol:NAD+ 2-oxidoreductase	myo-Inositol:NAD+ 2-oxidoreductase	myo-Inositol + NAD+ <=> 2,4,6/3,5-Pentahydroxycyclohexanone + NADH + H+	C00137 + C00003 <=> C00691 + C00004 + C00080	KEGG	1.1.1.18	1.1.1.18
R01184	myo-Inositol:oxygen oxidoreductase	myo-Inositol:oxygen oxidoreductase	myo-Inositol + Oxygen <=> D-Glucuronate + H2O	C00137 + C00007 <=> C00191 + C00001	KEGG	1.13.99.1	1.13.99.1
R01185	1D-myo-Inositol 1-phosphate phosphohydrolase	1D-myo-Inositol 1-phosphate phosphohydrolase	Inositol 1-phosphate + H2O <=> myo-Inositol + Orthophosphate	C01177 + C00001 <=> C00137 + C00009	KEGG	3.1.3.25	3.1.3.25
R01186	1D-myo-Inositol 4-phosphate phosphohydrolase	1D-myo-Inositol 4-phosphate phosphohydrolase	myo-Inositol 4-phosphate + H2O <=> myo-Inositol + Orthophosphate	C03546 + C00001 <=> C00137 + C00009	KEGG	3.1.3.25	3.1.3.25
R01187	1D-myo-Inositol 3-phosphate phosphohydrolase	1D-myo-Inositol 3-phosphate phosphohydrolase	1D-myo-Inositol 3-phosphate + H2O <=> myo-Inositol + Orthophosphate	C04006 + C00001 <=> C00137 + C00009	KEGG	3.1.3.25	3.1.3.25
R01188	S-adenosyl-L-methionine:1D-myo-inositol 1-O-methyltransferase	S-adenosyl-L-methionine:1D-myo-inositol 1-O-methyltransferase	S-Adenosyl-L-methionine + myo-Inositol <=> S-Adenosyl-L-homocysteine + 1-O-Methyl-myo-inositol	C00019 + C00137 <=> C00021 + C03659	KEGG	2.1.1.40	2.1.1.40
R01189	S-adenosyl-L-methionine:1D-myo-inositol 3-O-methyltransferase	S-adenosyl-L-methionine:1D-myo-inositol 3-O-methyltransferase	S-Adenosyl-L-methionine + myo-Inositol <=> S-Adenosyl-L-homocysteine + 3-O-Methyl-myo-inositol	C00019 + C00137 <=> C00021 + C03660	KEGG	2.1.1.39	2.1.1.39
R01190	S-adenosyl-L-methionine:1D-myo-inositol 4-methyltransferase	S-adenosyl-L-methionine:1D-myo-inositol 4-methyltransferase	S-Adenosyl-L-methionine + myo-Inositol <=> S-Adenosyl-L-homocysteine + 4-O-Methyl-myo-inositol	C00019 + C00137 <=> C00021 + C06352	KEGG	2.1.1.129	2.1.1.129
R01192	UDP-galactose:myo-inositol 3-alpha-D-galactosyltransferase; UDP-galactose:myo-inositol 1-alpha-D-galactosyltransferase	UDP-galactose:myo-inositol 3-alpha-D-galactosyltransferase	UDP-D-galactose + myo-Inositol <=> UDP + alpha-D-Galactosyl-(1->3)-1D-myo-inositol	C00052 + C00137 <=> C00015 + C01235	KEGG	2.4.1.123	2.4.1.123
R01193	1-(sn-glycero-3-phospho)-1D-myo-inositol glycerophosphohydrolase	1-(sn-glycero-3-phospho)-1D-myo-inositol glycerophosphohydrolase	sn-glycero-3-Phospho-1-inositol + H2O <=> myo-Inositol + sn-Glycerol 3-phosphate	C01225 + C00001 <=> C00137 + C00093	KEGG	3.1.4.44	3.1.4.44
R01194	3-O-alpha-D-Galactosyl-1D-myo-inositol galactohydrolase; 1-alpha-D-Galactosyl-myo-inositol galactohydrolase	3-O-alpha-D-Galactosyl-1D-myo-inositol galactohydrolase	alpha-D-Galactosyl-(1->3)-1D-myo-inositol + H2O <=> myo-Inositol + D-Galactose	C01235 + C00001 <=> C00137 + C00124	KEGG	3.2.1.22	3.2.1.22
R01195	Ferredoxin:NADP+ oxidoreductase	Ferredoxin:NADP+ oxidoreductase	2 Reduced ferredoxin + NADP+ + H+ <=> 2 Oxidized ferredoxin + NADPH	2 C00138 + C00006 + C00080 <=> 2 C00139 + C00005	KEGG	1.18.1.2	1.18.1.2
R01196	pyruvate:ferredoxin 2-oxidoreductase (CoA-acetylating)	pyruvate:ferredoxin 2-oxidoreductase (CoA-acetylating)	2 Reduced ferredoxin + Acetyl-CoA + CO2 + 2 H+ <=> 2 Oxidized ferredoxin + Pyruvate + CoA	2 C00138 + C00024 + C00011 + 2 C00080 <=> 2 C00139 + C00022 + C00010	KEGG	1.2.7.1，1.2.7.-	1.2.7.1
R01197	2-oxoglutarate:ferredoxin oxidoreductase (decarboxylating)	2-oxoglutarate:ferredoxin oxidoreductase (decarboxylating)	2 Reduced ferredoxin + Succinyl-CoA + CO2 + 2 H+ <=> 2 Oxidized ferredoxin + 2-Oxoglutarate + CoA	2 C00138 + C00091 + C00011 + 2 C00080 <=> 2 C00139 + C00026 + C00010	KEGG	1.2.7.3	1.2.7.3
R01199	2-oxobutanoate:ferredoxin 2-oxidoreductase (CoA-propanoylating)	2-oxobutanoate:ferredoxin 2-oxidoreductase (CoA-propanoylating)	2 Oxidized ferredoxin + 2-Oxobutanoate + CoA <=> 2 Reduced ferredoxin + Propanoyl-CoA + CO2 + 2 H+	2 C00139 + C00109 + C00010 <=> 2 C00138 + C00100 + C00011 + 2 C00080	KEGG	1.2.7.1，1.2.7.2	1.2.7.1
R01200	N-Acetyl-D-glucosamine amidohydrolase	N-Acetyl-D-glucosamine amidohydrolase	N-Acetyl-D-glucosamine + H2O <=> D-Glucosamine + Acetate	C00140 + C00001 <=> C00329 + C00033	KEGG	3.5.1.33	3.5.1.33
R01201	ATP:N-acetyl-D-glucosamine 6-phosphotransferase	ATP:N-acetyl-D-glucosamine 6-phosphotransferase	ATP + N-Acetyl-D-glucosamine <=> ADP + N-Acetyl-D-glucosamine 6-phosphate	C00002 + C00140 <=> C00008 + C00357	KEGG	2.7.1.59	2.7.1.59
R01202	N-Acetyl-D-glucosamine:NAD+ 1-oxidoreductase	N-Acetyl-D-glucosamine:NAD+ 1-oxidoreductase	N-Acetyl-D-glucosamine + NAD+ + H2O <=> N-Acetyl-D-glucosaminate + NADH + H+	C00140 + C00003 + C00001 <=> C01133 + C00004 + C00080	KEGG	1.1.1.240	1.1.1.240
R01203	N-acetyl-D-glucosamine:oxygen 1-oxidoreductase	N-acetyl-D-glucosamine:oxygen 1-oxidoreductase	N-Acetyl-D-glucosamine + Oxygen + H2O <=> N-Acetyl-D-glucosaminate + Hydrogen peroxide	C00140 + C00007 + C00001 <=> C01133 + C00027	KEGG	1.1.3.29	1.1.3.29
R01204	Acetyl-CoA:D-glucosamine N-acetyltransferase	Acetyl-CoA:D-glucosamine N-acetyltransferase	Acetyl-CoA + D-Glucosamine <=> CoA + N-Acetyl-D-glucosamine	C00024 + C00329 <=> C00010 + C00140	KEGG	2.3.1.3	2.3.1.3
R01205	UDP-galactose:N-acetyl-D-glucosamine 4-beta-D-galactosyltransferase	UDP-galactose:N-acetyl-D-glucosamine 4-beta-D-galactosyltransferase	UDP-D-galactose + N-Acetyl-D-glucosamine <=> UDP + N-Acetyllactosamine	C00052 + C00140 <=> C00015 + C00611	KEGG	2.4.1.90	2.4.1.90
R01206	[1,4-(N-Acetyl-beta-D-glucosaminyl)]n glycanohydrolase	[1,4-(N-Acetyl-beta-D-glucosaminyl)]n glycanohydrolase	Chitin + H2O <=> N-Acetyl-D-glucosamine + Chitin	C00461 + C00001 <=> C00140 + C00461	KEGG	3.2.1.14	3.2.1.14
R01207	N-acetyl-D-glucosamine 2-epimerase	N-acetyl-D-glucosamine 2-epimerase	N-Acetyl-D-glucosamine <=> N-Acetyl-D-mannosamine	C00140 <=> C00645	KEGG	5.1.3.8	5.1.3.8
R01209	2,3-Dihydroxy-3-methylbutanoate hydro-lyase	2,3-Dihydroxy-3-methylbutanoate hydro-lyase	2,3-Dihydroxy-3-methylbutanoate <=> 3-Methyl-2-oxobutanoic acid + H2O	C04039 <=> C00141 + C00001	KEGG	4.2.1.9	4.2.1.9
R01210	3-methyl-2-oxobutanoate:NAD+ oxidoreductase (CoA-mehtylpropanoylating)	3-methyl-2-oxobutanoate:NAD+ oxidoreductase (CoA-mehtylpropanoylating)	3-Methyl-2-oxobutanoic acid + CoA + NAD+ <=> 2-Methylpropanoyl-CoA + CO2 + NADH + H+	C00141 + C00010 + C00003 <=> C00630 + C00011 + C00004 + C00080	KEGG	1.2.1.25	1.2.1.25
R01211	(R)-3,3-Dimethylmalate:NAD+ oxidoreductase (decarboxylating)	(R)-3,3-Dimethylmalate:NAD+ oxidoreductase (decarboxylating)	(R)-3,3-Dimethylmalate + NAD+ <=> 3-Methyl-2-oxobutanoic acid + CO2 + NADH + H+	C01088 + C00003 <=> C00141 + C00011 + C00004 + C00080	KEGG	1.1.1.84	1.1.1.84
R01212	L-valine:NADP+ oxidoreductase (deaminating)	L-valine:NADP+ oxidoreductase (deaminating)	L-Valine + NADP+ + H2O <=> 3-Methyl-2-oxobutanoic acid + NH3 + NADPH + H+	C00183 + C00006 + C00001 <=> C00141 + C00014 + C00005 + C00080	KEGG	1.4.1.8	1.4.1.8
R01213	acetyl-CoA:3-methyl-2-oxobutanoate C-acetyltransferase (thioester-hydrolysing, carboxymethyl-forming); 3-Carboxy-3-hydroxy-4-methylpentanoate 3-methyl-2-oxobutanoate-lyase (CoA-acetylating)	3-Carboxy-3-hydroxy-4-methylpentanoate 3-methyl-2-oxobutanoate-lyase (CoA-acetylating)	alpha-Isopropylmalate + CoA <=> Acetyl-CoA + 3-Methyl-2-oxobutanoic acid + H2O	C02504 + C00010 <=> C00024 + C00141 + C00001	KEGG	2.3.3.13	2.3.3.13
R01214	L-Valine:2-oxoglutarate aminotransferase	L-Valine:2-oxoglutarate aminotransferase	L-Valine + 2-Oxoglutarate <=> 3-Methyl-2-oxobutanoic acid + L-Glutamate	C00183 + C00026 <=> C00141 + C00025	KEGG	2.6.1.6，2.6.1.42	2.6.1.6
R01215	L-Valine:pyruvate aminotransferase	L-Valine:pyruvate aminotransferase	L-Valine + Pyruvate <=> 3-Methyl-2-oxobutanoic acid + L-Alanine	C00183 + C00022 <=> C00141 + C00041	KEGG	2.6.1.66	2.6.1.66
R01216	2-dehydropantoate formaldehyde-lyase (3-methyl-2-oxobutanoate-forming)	2-dehydropantoate formaldehyde-lyase (3-methyl-2-oxobutanoate-forming)	2-Dehydropantoate <=> 3-Methyl-2-oxobutanoic acid + Formaldehyde	C00966 <=> C00141 + C00067	KEGG	2.1.2.11，4.1.2.12	2.1.2.11
R01217	5-methyltetrahydrofolate:ferredoxin oxidoreductase	5-methyltetrahydrofolate:ferredoxin oxidoreductase	5,10-Methylenetetrahydrofolate + 2 Reduced ferredoxin + 2 H+ <=> 5-Methyltetrahydrofolate + 2 Oxidized ferredoxin	C00143 + 2 C00138 + 2 C00080 <=> C00440 + 2 C00139	KEGG	1.5.7.1	1.5.7.1
R01218	5,10-methylenetetrahydrofolate:NAD+ oxidoreductase	5,10-methylenetetrahydrofolate:NAD+ oxidoreductase	5,10-Methylenetetrahydrofolate + NAD+ <=> 5,10-Methenyltetrahydrofolate + NADH	C00143 + C00003 <=> C00445 + C00004	KEGG	1.5.1.15	1.5.1.15
R01220	5,10-methylenetetrahydrofolate:NADP+ oxidoreductase	5,10-methylenetetrahydrofolate:NADP+ oxidoreductase	5,10-Methylenetetrahydrofolate + NADP+ <=> 5,10-Methenyltetrahydrofolate + NADPH	C00143 + C00006 <=> C00445 + C00005	KEGG	1.5.1.5	1.5.1.5
R01221	glycine synthase; glycine cleavage system	glycine synthase	Glycine + Tetrahydrofolate + NAD+ <=> 5,10-Methylenetetrahydrofolate + NH3 + CO2 + NADH + H+	C00037 + C00101 + C00003 <=> C00143 + C00014 + C00011 + C00004 + C00080	KEGG	1.4.4.2，1.8.1.4，2.1.2.10	1.4.4.2
R01224	5-methyltetrahydrofolate:NADP+ oxidoreductase	5-methyltetrahydrofolate:NADP+ oxidoreductase	5-Methyltetrahydrofolate + NADP+ <=> 5,10-Methylenetetrahydrofolate + NADPH + H+	C00440 + C00006 <=> C00143 + C00005 + C00080	KEGG	1.5.1.20	1.5.1.20
R01225	5,10-Methylenetetrahydrofolate:D-alanine 2-hydroxymethyltransferase	5,10-Methylenetetrahydrofolate:D-alanine 2-hydroxymethyltransferase	5,10-Methylenetetrahydrofolate + D-Alanine + H2O <=> Tetrahydrofolate + 2-Methylserine	C00143 + C00133 + C00001 <=> C00101 + C02115	KEGG	2.1.2.7	2.1.2.7
R01226	5,10-Methylenetetrahydrofolate:3-methyl-2-oxobutanoate hydroxymethyltransferase	5,10-Methylenetetrahydrofolate:3-methyl-2-oxobutanoate hydroxymethyltransferase	5,10-Methylenetetrahydrofolate + 3-Methyl-2-oxobutanoic acid + H2O <=> Tetrahydrofolate + 2-Dehydropantoate	C00143 + C00141 + C00001 <=> C00101 + C00966	KEGG	2.1.2.11	2.1.2.11
R01227	Guanosine 5'-monophosphate phosphohydrolase	Guanosine 5'-monophosphate phosphohydrolase	GMP + H2O <=> Guanosine + Orthophosphate	C00144 + C00001 <=> C00387 + C00009	KEGG	3.1.3.5	3.1.3.5
R01228	ATP:guanosine 5'-phosphotransferase	ATP:guanosine 5'-phosphotransferase	ATP + Guanosine <=> ADP + GMP	C00002 + C00387 <=> C00008 + C00144	KEGG	2.7.1.73	2.7.1.73
R01229	GMP:diphosphate 5-phospho-alpha-D-ribosyltransferase	GMP:diphosphate 5-phospho-alpha-D-ribosyltransferase	GMP + Diphosphate <=> Guanine + 5-Phospho-alpha-D-ribose 1-diphosphate	C00144 + C00013 <=> C00242 + C00119	KEGG	2.4.2.7，2.4.2.8，2.4.2.22	2.4.2.7
R01230	Xanthosine-5'-phosphate:ammonia ligase (AMP-forming)	Xanthosine-5'-phosphate:ammonia ligase (AMP-forming)	ATP + Xanthosine 5'-phosphate + NH3 <=> AMP + Diphosphate + GMP	C00002 + C00655 + C00014 <=> C00020 + C00013 + C00144	KEGG	6.3.4.1，6.3.5.2	6.3.4.1
R01231	Xanthosine-5'-phosphate:L-glutamine amido-ligase (AMP-forming)	Xanthosine-5'-phosphate:L-glutamine amido-ligase (AMP-forming)	ATP + Xanthosine 5'-phosphate + L-Glutamine + H2O <=> AMP + Diphosphate + GMP + L-Glutamate	C00002 + C00655 + C00064 + C00001 <=> C00020 + C00013 + C00144 + C00025	KEGG	6.3.5.2	6.3.5.2
R01232	P1,P4-bis(5'-guanosyl)-tetraphosphate guanylylhydrolase	P1,P4-bis(5'-guanosyl)-tetraphosphate guanylylhydrolase	P1,P4-Bis(5'-guanosyl) tetraphosphate + H2O <=> GTP + GMP	C01261 + C00001 <=> C00044 + C00144	KEGG	3.6.1.17	3.6.1.17
R01233	GDPglucose sugarphosphohydrolase	GDPglucose sugarphosphohydrolase	GDP-glucose + H2O <=> GMP + D-Glucose 1-phosphate	C00394 + C00001 <=> C00144 + C00103	KEGG	3.6.1.21	3.6.1.21
R01234	Guanosine 3',5'-cyclic phosphate 5'-nucleotidohydrolase	Guanosine 3',5'-cyclic phosphate 5'-nucleotidohydrolase	3',5'-Cyclic GMP + H2O <=> GMP	C00942 + C00001 <=> C00144	KEGG	3.1.4.17，3.1.4.35	3.1.4.17
R01235	NO NAME	NO NAME	Thiol + S-Adenosyl-L-methionine <=> Sulfide + S-Adenosyl-L-homocysteine	C00145 + C00019 <=> C00297 + C00021	KEGG	2.1.1.9	2.1.1.9
R01236	3'-Phosphoadenylylsulfate:thiol S-sulfotransferase	3'-Phosphoadenylylsulfate:thiol S-sulfotransferase	3'-Phosphoadenylyl sulfate + Thiol <=> Adenosine 3',5'-bisphosphate + S-Alkyl thiosulfate	C00053 + C00145 <=> C00054 + C02885	KEGG	2.8.2.16	2.8.2.16
R01237	Thioglucoside glucohydrolase	Thioglucoside glucohydrolase	Thioglucoside + H2O <=> Thiol + Sugar	C02085 + C00001 <=> C00145 + C11477	KEGG	3.2.1.147	3.2.1.147
R01238	4-hydroxybenzoate carboxy-lyase (phenol-forming)	4-hydroxybenzoate carboxy-lyase (phenol-forming)	4-Hydroxybenzoate <=> Phenol + CO2	C00156 <=> C00146 + C00011	KEGG	4.1.1.61	4.1.1.61
R01239	S-Adenosyl-L-methionine:phenol O-methyltransferase	S-Adenosyl-L-methionine:phenol O-methyltransferase	S-Adenosyl-L-methionine + Phenol <=> S-Adenosyl-L-homocysteine + Anisole	C00019 + C00146 <=> C00021 + C01403	KEGG	2.1.1.25	2.1.1.25
R01240	UDP-glucose:phenol beta-D-glucosyltransferase	UDP-glucose:phenol beta-D-glucosyltransferase	UDP-glucose + Phenol <=> UDP + Aryl beta-D-glucoside	C00029 + C15584 <=> C00015 + C03097	KEGG	2.4.1.35	2.4.1.35
R01241	phenyl acetate acetylhydrolase	phenyl acetate acetylhydrolase	Phenol + Acetate <=> Phenyl acetate + H2O	C00146 + C00033 <=> C00548 + C00001	KEGG	3.1.1.2	3.1.1.2
R01242	3'-Phosphoadenylylsulfate:phenol sulfotransferase	3'-Phosphoadenylylsulfate:phenol sulfotransferase	3'-Phosphoadenylyl sulfate + Phenol <=> Adenosine 3',5'-bisphosphate + Aryl sulfate	C00053 + C15584 <=> C00054 + C00850	KEGG	2.8.2.1	2.8.2.1
R01243	aryl-sulfate sulfohydrolase	aryl-sulfate sulfohydrolase	Aryl sulfate + H2O <=> Phenol + Sulfate	C00850 + C00001 <=> C15584 + C00059	KEGG	3.1.6.1	3.1.6.1
R01244	Adenine aminohydrolase	Adenine aminohydrolase	Adenine + H2O <=> Hypoxanthine + NH3	C00147 + C00001 <=> C00262 + C00014	KEGG	3.5.4.2	3.5.4.2
R01245	Adenosine ribohydrolase	Adenosine ribohydrolase	Adenosine + H2O <=> Adenine + D-Ribose	C00212 + C00001 <=> C00147 + C00121	KEGG	3.2.2.1，3.2.2.7，3.2.2.8	3.2.2.1
R01246	L-proline:NAD+ 2-oxidoreductase	L-proline:NAD+ 2-oxidoreductase	L-Proline + NAD+ <=> 1-Pyrroline-2-carboxylate + NADH + H+	C00148 + C00003 <=> C03564 + C00004 + C00080	KEGG	1.5.1.1	1.5.1.1
R01248	L-Proline:NAD+ 5-oxidoreductase	L-Proline:NAD+ 5-oxidoreductase	L-Proline + NAD+ <=> (S)-1-Pyrroline-5-carboxylate + NADH + H+	C00148 + C00003 <=> C03912 + C00004 + C00080	KEGG	1.5.1.2	1.5.1.2
R01249	L-proline:NADP+ 2-oxidoreductase	L-proline:NADP+ 2-oxidoreductase	L-Proline + NADP+ <=> 1-Pyrroline-2-carboxylate + NADPH + H+	C00148 + C00006 <=> C03564 + C00005 + C00080	KEGG	1.5.1.1	1.5.1.1
R01251	L-Proline:NADP+ 5-oxidoreductase	L-Proline:NADP+ 5-oxidoreductase	L-Proline + NADP+ <=> (S)-1-Pyrroline-5-carboxylate + NADPH + H+	C00148 + C00006 <=> C03912 + C00005 + C00080	KEGG	1.5.1.2	1.5.1.2
R01252	L-Proline,2-oxoglutarate:oxygen oxidoreductase (4-hydroxylating)	L-Proline,2-oxoglutarate:oxygen oxidoreductase (4-hydroxylating)	L-Proline + 2-Oxoglutarate + Oxygen <=> trans-4-Hydroxy-L-proline + Succinate + CO2	C00148 + C00026 + C00007 <=> C01157 + C00042 + C00011	KEGG	1.14.11.2	1.14.11.2
R01253	L-proline:(acceptor) oxidoreductase	L-proline:(acceptor) oxidoreductase	L-Proline + Acceptor <=> (S)-1-Pyrroline-5-carboxylate + Reduced acceptor	C00148 + C00028 <=> C03912 + C00030	KEGG	1.5.99.8	1.5.99.8
R01255	proline racemase	proline racemase	L-Proline <=> D-Proline	C00148 <=> C00763	KEGG	5.1.1.4	5.1.1.4
R01256	(S)-Malate:CoA ligase (ADP-forming)	(S)-Malate:CoA ligase (ADP-forming)	ATP + (S)-Malate + CoA <=> ADP + Orthophosphate + (3S)-3-Carboxy-3-hydroxypropanoyl-CoA	C00002 + C00149 + C00010 <=> C00008 + C00009 + C04348	KEGG	6.2.1.9	6.2.1.9
R01257	(S)-Malate:(acceptor) oxidoreductase	(S)-Malate:(acceptor) oxidoreductase	(S)-Malate + FAD <=> FADH2 + Oxaloacetate	C00149 + C00016 <=> C01352 + C00036	KEGG	1.1.5.4	1.1.5.4
R01258	L-amino-aicd:NAD+ oxidoreductase (deaminating)	L-amino-aicd:NAD+ oxidoreductase (deaminating)	L-Amino acid + NAD+ + H2O <=> 2-Oxo acid + NH3 + NADH + H+	C00151 + C00003 + C00001 <=> C00161 + C00014 + C00004 + C00080	KEGG	1.4.1.5	1.4.1.5
R01259	L-Amino-acid:oxygen oxidoreductase (deaminating)	L-Amino-acid:oxygen oxidoreductase (deaminating)	L-Amino acid + H2O + Oxygen <=> 2-Oxo acid + NH3 + Hydrogen peroxide	C00151 + C00001 + C00007 <=> C00161 + C00014 + C00027	KEGG	1.4.3.2	1.4.3.2
R01260	L-amino acid,NADPH:oxygen oxidoreductase (N-hydroxylating)	L-amino acid,NADPH:oxygen oxidoreductase (N-hydroxylating)	L-Amino acid + Oxygen + NADPH <=> N-Hydroxy-amino acid + NADP+ + H2O	C00151 + C00007 + C00005 <=> C05710 + C00006 + C00001	KEGG	1.14.13.-	1.14.13.-
R01261	L-Alanine:2-oxo-acid aminotransferase	L-Alanine:2-oxo-acid aminotransferase	L-Alanine + 2-Oxo acid <=> Pyruvate + L-Amino acid	C00041 + C00161 <=> C00022 + C00151	KEGG	2.6.1.12	2.6.1.12
R01262	glutathione:L-amino-acid 5-glutamyltransferase	glutathione:L-amino-acid 5-glutamyltransferase	Glutathione + L-Amino acid <=> Cys-Gly + (5-L-Glutamyl)-L-amino acid	C00051 + C00151 <=> C01419 + C03740	KEGG	2.3.2.2	2.3.2.2
R01263	N-Acyl-L-amino-acid amidohydrolase	N-Acyl-L-amino-acid amidohydrolase	N-Acyl-L-amino acid + H2O <=> Carboxylate + L-Amino acid	C02850 + C00001 <=> C00060 + C00151	KEGG	3.5.1.14	3.5.1.14
R01264	N-Methyl-L-amino-acid:oxygen oxidoreductase (demethylating)	N-Methyl-L-amino-acid:oxygen oxidoreductase (demethylating)	N-Methyl-L-amino acid + H2O + Oxygen <=> L-Amino acid + Formaldehyde + Hydrogen peroxide	C03148 + C00001 + C00007 <=> C00151 + C00067 + C00027	KEGG	1.5.3.2	1.5.3.2
R01265	amino-acid racemase	amino-acid racemase	L-Amino acid <=> D-Amino acid	C00151 <=> C00405	KEGG	5.1.1.10	5.1.1.10
R01266	1-beta-Aspartyl-N-acetyl-D-glucosaminylamine L-asparaginohydrolase	1-beta-Aspartyl-N-acetyl-D-glucosaminylamine L-asparaginohydrolase	N4-(Acetyl-beta-D-glucosaminyl)asparagine + H2O <=> N-Acetyl-D-glucosamine + L-Asparagine	C04540 + C00001 <=> C00140 + C00152	KEGG	3.2.2.11	3.2.2.11
R01267	L-asparagine hydro-lyase (3-cyanoalanine-forming)	L-asparagine hydro-lyase (3-cyanoalanine-forming)	L-Asparagine <=> 3-Cyano-L-alanine + H2O	C00152 <=> C02512 + C00001	KEGG	4.2.1.65	4.2.1.65
R01268	Nicotinamide amidohydrolase	Nicotinamide amidohydrolase	Nicotinamide + H2O <=> Nicotinate + NH3	C00153 + C00001 <=> C00253 + C00014	KEGG	3.5.1.19	3.5.1.19
R01269	S-Adenosyl-L-methionine:nicotinamide N-methyltransferase	S-Adenosyl-L-methionine:nicotinamide N-methyltransferase	S-Adenosyl-L-methionine + Nicotinamide + H+ <=> S-Adenosyl-L-homocysteine + 1-Methylnicotinamide	C00019 + C00153 + C00080 <=> C00021 + C02918	KEGG	2.1.1.1	2.1.1.1
R01270	Nicotinamide D-ribonucleotide phosphoribohydrolase	Nicotinamide D-ribonucleotide phosphoribohydrolase	Nicotinamide D-ribonucleotide + H2O <=> Nicotinamide + D-Ribose 5-phosphate	C00455 + C00001 <=> C00153 + C00117	KEGG	3.2.2.14	3.2.2.14
R01271	nicotinamide-D-ribonucleotide:diphosphate phospho-alpha-D-ribosyltransferase	nicotinamide-D-ribonucleotide:diphosphate phospho-alpha-D-ribosyltransferase	Nicotinamide D-ribonucleotide + Diphosphate <=> Nicotinamide + 5-Phospho-alpha-D-ribose 1-diphosphate	C00455 + C00013 <=> C00153 + C00119	KEGG	2.4.2.12	2.4.2.12
R01273	N-ribosylnicotinamide ribohydrolase	N-ribosylnicotinamide ribohydrolase	N-Ribosylnicotinamide + H2O <=> Nicotinamide + D-Ribose	C03150 + C00001 <=> C00153 + C00121	KEGG	3.2.2.1	3.2.2.1
R01274	Palmitoyl-CoA hydrolase	Palmitoyl-CoA hydrolase	Palmitoyl-CoA + H2O <=> CoA + Hexadecanoic acid	C00154 + C00001 <=> C00010 + C00249	KEGG	3.1.2.2，3.1.2.22	3.1.2.2
R01277	hexadecanal:NAD+ oxidoreductase (CoA-acylating)	hexadecanal:NAD+ oxidoreductase (CoA-acylating)	Hexadecanal + CoA + NAD+ <=> Palmitoyl-CoA + NADH + H+	C00517 + C00010 + C00003 <=> C00154 + C00004 + C00080	KEGG	1.2.1.42	1.2.1.42
R01278	hexadecanoyl-CoA:NADP+ trans-2-oxidoreductase; trans-Hexadec-2-enoyl-CoA reductase	hexadecanoyl-CoA:NADP+ trans-2-oxidoreductase	Palmitoyl-CoA + NADP+ <=> trans-Hexadec-2-enoyl-CoA + NADPH + H+	C00154 + C00006 <=> C05272 + C00005 + C00080	KEGG	1.3.1.8，1.3.1.38	1.3.1.8
R01279	Palmitoyl-CoA:oxygen 2-oxidoreductase	Palmitoyl-CoA:oxygen 2-oxidoreductase	Palmitoyl-CoA + FAD <=> trans-Hexadec-2-enoyl-CoA + FADH2	C00154 + C00016 <=> C05272 + C01352	KEGG	1.3.3.6，1.3.99.3，1.3.99.13，1.3.99.-	1.3.3.6
R01280	Palmitate:CoA ligase (AMP-forming)	Palmitate:CoA ligase (AMP-forming)	ATP + Hexadecanoic acid + CoA <=> AMP + Palmitoyl-CoA + Diphosphate	C00002 + C00249 + C00010 <=> C00020 + C00154 + C00013	KEGG	6.2.1.3	6.2.1.3
R01281	Palmitoyl-CoA:L-serine C-palmitoyltransferase (decarboxylating)	Palmitoyl-CoA:L-serine C-palmitoyltransferase (decarboxylating)	Palmitoyl-CoA + L-Serine <=> 3-Dehydrosphinganine + CoA + CO2	C00154 + C00065 <=> C02934 + C00010 + C00011	KEGG	2.3.1.50	2.3.1.50
R01282	NO NAME	NO NAME	Palmitoyl-CoA + Acceptor <=> trans-Hexadec-2-enoyl-CoA + Reduced acceptor	C00154 + C00028 <=> C05272 + C00030	KEGG
R01283	L-homocysteine hydrogen-sulfide-lyase (deaminating; 2-oxobutanoate-forming)	L-homocysteine hydrogen-sulfide-lyase (deaminating; 2-oxobutanoate-forming)	L-Homocysteine + H2O <=> Hydrogen sulfide + NH3 + 2-Oxobutanoate	C00155 + C00001 <=> C00283 + C00014 + C00109	KEGG	4.4.1.2	4.4.1.2
R01285	Cystathionine L-homocysteine-lyase (deaminating)	Cystathionine L-homocysteine-lyase (deaminating)	Cystathionine + H2O <=> L-Homocysteine + NH3 + Pyruvate	C00542 + C00001 <=> C00155 + C00014 + C00022	KEGG	4.4.1.8	4.4.1.8
R01286	L-cystathionine L-homocysteine-lyase (deaminating; pyruvate-forming)	L-cystathionine L-homocysteine-lyase (deaminating; pyruvate-forming)	L-Cystathionine + H2O <=> L-Homocysteine + NH3 + Pyruvate	C02291 + C00001 <=> C00155 + C00014 + C00022	KEGG	4.4.1.8	4.4.1.8
R01287	O-acetyl-L-homoserine:hydrogen sulfide S-(3-amino-3-carboxypropyl)transferase; O-acetyl-L-homoserine acetate-lyase (adding hydrogen sulfide)	O-acetyl-L-homoserine acetate-lyase (adding hydrogen sulfide)	O-Acetyl-L-homoserine + Hydrogen sulfide <=> L-Homocysteine + Acetate	C01077 + C00283 <=> C00155 + C00033	KEGG	2.5.1.49	2.5.1.49
R01288	O4-succinyl-L-homoserine:hydrogen sulfide S-(3-amino-3-carboxypropyl)transferase; O-succinyl-L-homoserine succinate-lyase (adding hydrogen sulfide)	O-succinyl-L-homoserine succinate-lyase (adding hydrogen sulfide)	O-Succinyl-L-homoserine + Hydrogen sulfide <=> L-Homocysteine + Succinate	C01118 + C00283 <=> C00155 + C00042	KEGG	2.5.1.48，2.5.1.-	2.5.1.48
R01289	L-Serine hydro-lyase (adding homocysteine)	L-Serine hydro-lyase (adding homocysteine)	L-Serine + L-Homocysteine <=> Cystathionine + H2O	C00065 + C00155 <=> C00542 + C00001	KEGG	4.2.1.22	4.2.1.22
R01290	L-serine hydro-lyase (adding homocysteine; L-cystathionine-forming)	L-serine hydro-lyase (adding homocysteine; L-cystathionine-forming)	L-Serine + L-Homocysteine <=> L-Cystathionine + H2O	C00065 + C00155 <=> C02291 + C00001	KEGG	4.2.1.22	4.2.1.22
R01291	S-(5-deoxy-D-ribos-5-yl)-L-homocysteine homocysteine-lyase [(4S)-4,5-dihydroxypentan-2,3-dione-forming]	S-(5-deoxy-D-ribos-5-yl)-L-homocysteine homocysteine-lyase [(4S)-4,5-dihydroxypentan-2,3-dione-forming]	S-Ribosyl-L-homocysteine <=> (4S)-4,5-Dihydroxypentan-2,3-dione + L-Homocysteine	C03539 <=> C11838 + C00155	KEGG	4.4.1.21	4.4.1.21
R01292	Glutathione:homocystine oxidoreductase	Glutathione:homocystine oxidoreductase	Homocystine + 2 Glutathione <=> 2 L-Homocysteine + Glutathione disulfide	C01817 + 2 C00051 <=> 2 C00155 + C00127	KEGG	1.8.4.1	1.8.4.1
R01293	4-hydroxybenzaldehyde:NAD+ oxidoreductase	4-hydroxybenzaldehyde:NAD+ oxidoreductase	4-Hydroxybenzaldehyde + NAD+ + H2O <=> 4-Hydroxybenzoate + NADH + H+	C00633 + C00003 + C00001 <=> C00156 + C00004 + C00080	KEGG	1.2.1.28，1.2.1.64	1.2.1.28
R01294	4-Hydroxybenzaldehyde:NADP+ oxidoreductase	4-Hydroxybenzaldehyde:NADP+ oxidoreductase	4-Hydroxybenzaldehyde + NADP+ + H2O <=> 4-Hydroxybenzoate + NADPH + H+	C00633 + C00006 + C00001 <=> C00156 + C00005 + C00080	KEGG	1.2.1.7	1.2.1.7
R01295	benzoate,NADPH:oxygen oxidoreductase (4-hydroxylating)	benzoate,NADPH:oxygen oxidoreductase (4-hydroxylating)	Benzoate + Oxygen + NADPH + H+ <=> 4-Hydroxybenzoate + NADP+ + H2O	C00180 + C00007 + C00005 + C00080 <=> C00156 + C00006 + C00001	KEGG	1.14.13.12	1.14.13.12
R01296	4-hydroxybenzoate,NADH:oxygen oxidoreductase (3-hydroxylating)	4-hydroxybenzoate,NADH:oxygen oxidoreductase (3-hydroxylating)	4-Hydroxybenzoate + Oxygen + NADH + H+ <=> 3,4-Dihydroxybenzoate + NAD+ + H2O	C00156 + C00007 + C00004 + C00080 <=> C00230 + C00003 + C00001	KEGG	1.14.13.33	1.14.13.33
R01297	4-hydroxybenzoate,NADH:oxygen oxidoreductase (1-hydroxylating, decarboxylating)	4-hydroxybenzoate,NADH:oxygen oxidoreductase (1-hydroxylating, decarboxylating)	4-Hydroxybenzoate + Oxygen + NADH + H+ <=> Hydroquinone + CO2 + NAD+ + H2O	C00156 + C00007 + C00004 + C00080 <=> C00530 + C00011 + C00003 + C00001	KEGG	1.14.13.64	1.14.13.64
R01298	4-hydroxybenzoate,NADPH:oxygen oxidoreductase (3-hydroxylating)	4-hydroxybenzoate,NADPH:oxygen oxidoreductase (3-hydroxylating)	4-Hydroxybenzoate + Oxygen + NADPH + H+ <=> 3,4-Dihydroxybenzoate + NADP+ + H2O	C00156 + C00007 + C00005 + C00080 <=> C00230 + C00006 + C00001	KEGG	1.14.13.2，1.14.13.33	1.14.13.2
R01299	4-hydroxybenzoate,NADPH:oxygen oxidoreductase (1-hydroxylating, decarboxylating)	4-hydroxybenzoate,NADPH:oxygen oxidoreductase (1-hydroxylating, decarboxylating)	4-Hydroxybenzoate + Oxygen + NADPH + H+ <=> Hydroquinone + CO2 + NADP+ + H2O	C00156 + C00007 + C00005 + C00080 <=> C00530 + C00011 + C00006 + C00001	KEGG	1.14.13.64	1.14.13.64
R01300	4-Hydroxybenzoate:CoA ligase (AMP-forming)	4-Hydroxybenzoate:CoA ligase (AMP-forming)	ATP + 4-Hydroxybenzoate + CoA <=> AMP + Diphosphate + 4-Hydroxybenzoyl-CoA	C00002 + C00156 + C00010 <=> C00020 + C00013 + C02949	KEGG	6.2.1.27	6.2.1.27
R01301	4-Hydroxybenzoyl-CoA hydrolase	4-Hydroxybenzoyl-CoA hydrolase	4-Hydroxybenzoyl-CoA + H2O <=> 4-Hydroxybenzoate + CoA	C02949 + C00001 <=> C00156 + C00010	KEGG	3.1.2.23	3.1.2.23
R01302	chorismate pyruvate-lyase (4-hydroxybenzoate-forming)	chorismate pyruvate-lyase (4-hydroxybenzoate-forming)	4-Hydroxybenzoate + Pyruvate <=> Chorismate	C00156 + C00022 <=> C00251	KEGG	4.1.3.40	4.1.3.40
R01303	NO NAME	NO NAME	4-Hydroxybenzoate + Acceptor + H2O <=> 4-Hydroxybenzaldehyde + Reduced acceptor + Oxygen	C00156 + C00028 + C00001 <=> C00633 + C00030 + C00007	KEGG	1.14.99.-	1.14.99.-
R01304	UDP-glucose:4-hydroxybenzoate 4-O-beta-D-glucosyltransferase	UDP-glucose:4-hydroxybenzoate 4-O-beta-D-glucosyltransferase	UDP-glucose + 4-Hydroxybenzoate <=> UDP + 4-(beta-D-Glucosyloxy)benzoate	C00029 + C00156 <=> C00015 + C03993	KEGG	2.4.1.194	2.4.1.194
R01305	2,4'-dihydroxyacetophenone oxidoreductase (C-C-bond-cleaving)	2,4'-dihydroxyacetophenone oxidoreductase (C-C-bond-cleaving)	4-Hydroxyphenacyl alcohol + Oxygen <=> 4-Hydroxybenzoate + Formate	C13635 + C00007 <=> C00156 + C00058	KEGG	1.13.11.41	1.13.11.41
R01306	4-Methoxybenzoate,hydrogen-donor:oxygen oxidoreductase (O-demethylating)	4-Methoxybenzoate,hydrogen-donor:oxygen oxidoreductase (O-demethylating)	4-Methoxybenzoate + Reduced acceptor + Oxygen <=> 4-Hydroxybenzoate + Formaldehyde + Acceptor + H2O	C02519 + C00030 + C00007 <=> C00156 + C00067 + C00028 + C00001	KEGG	1.14.99.15	1.14.99.15
R01307	4-Chlorobenzoate chlorohydrolase	4-Chlorobenzoate chlorohydrolase	4-Chlorobenzoate + H2O <=> 4-Hydroxybenzoate + Cl- + H+	C02370 + C00001 <=> C00156 + C00698 + C00080	KEGG	3.8.1.6	3.8.1.6
R01308	NO NAME	NO NAME	4-Hydroxybenzoate + Acetate + NADH + H+ <=> 4-Coumarate + 2 H2O + NAD+	C00156 + C00033 + C00004 + C00080 <=> C00811 + 2 C00001 + C00003	KEGG
R01309	phosphatidylcholine acylhydrolase	phosphatidylcholine acylhydrolase	Phosphatidylcholine + 2 H2O <=> sn-glycero-3-Phosphocholine + 2 Fatty acid	C00157 + 2 C00001 <=> C00670 + 2 C00162	KEGG	3.1.1.5	3.1.1.5
R01310	Phosphatidylcholine phosphatidohydrolase	Phosphatidylcholine phosphatidohydrolase	Phosphatidylcholine + H2O <=> Phosphatidate + Choline	C00157 + C00001 <=> C00416 + C00114	KEGG	3.1.4.4	3.1.4.4
R01312	Phosphatidylcholine cholinephosphohydrolase	Phosphatidylcholine cholinephosphohydrolase	Phosphatidylcholine + H2O <=> 1,2-Diacyl-sn-glycerol + Choline phosphate	C00157 + C00001 <=> C00641 + C00588	KEGG	3.1.4.3	3.1.4.3
R01313	Phosphatidylcholine 2-acylhydrolase	Phosphatidylcholine 2-acylhydrolase	Phosphatidylcholine + H2O <=> 1-Acyl-sn-glycero-3-phosphocholine + Carboxylate	C00157 + C00001 <=> C04230 + C00060	KEGG	3.1.1.4	3.1.1.4
R01314	Phosphatidylcholine 1-acylhydrolase	Phosphatidylcholine 1-acylhydrolase	Phosphatidylcholine + H2O <=> 2-Acyl-sn-glycero-3-phosphocholine + Carboxylate	C00157 + C00001 <=> C04233 + C00060	KEGG	3.1.1.32	3.1.1.32
R01315	Phosphatidylcholine 2-acylhydrolase	Phosphatidylcholine 2-acylhydrolase	Phosphatidylcholine + H2O <=> 1-Acyl-sn-glycero-3-phosphocholine + Fatty acid	C00157 + C00001 <=> C04230 + C00162	KEGG	3.1.1.4	3.1.1.4
R01316	Phosphatidylcholine 1-acylhydrolase	Phosphatidylcholine 1-acylhydrolase	Phosphatidylcholine + H2O <=> 2-Acyl-sn-glycero-3-phosphocholine + Fatty acid	C00157 + C00001 <=> C04233 + C00162	KEGG	3.1.1.32	3.1.1.32
R01317	Phosphatidylcholine 2-acylhydrolase	Phosphatidylcholine 2-acylhydrolase	Phosphatidylcholine + H2O <=> 1-Acyl-sn-glycero-3-phosphocholine + (5Z,8Z,11Z,14Z)-Icosatetraenoic acid	C00157 + C00001 <=> C04230 + C00219	KEGG	3.1.1.4	3.1.1.4
R01318	Acyl-CoA:1-acyl-sn-glycero-3-phosphocholine O-acyltransferase	Acyl-CoA:1-acyl-sn-glycero-3-phosphocholine O-acyltransferase	Acyl-CoA + 1-Acyl-sn-glycero-3-phosphocholine <=> CoA + Phosphatidylcholine	C00040 + C04230 <=> C00010 + C00157	KEGG	2.3.1.23	2.3.1.23
R01319	Acyl-CoA:2-acyl-sn-glycero-3-phosphocholine O-acyltransferase	Acyl-CoA:2-acyl-sn-glycero-3-phosphocholine O-acyltransferase	Acyl-CoA + 2-Acyl-sn-glycero-3-phosphocholine <=> CoA + Phosphatidylcholine	C00040 + C04233 <=> C00010 + C00157	KEGG	2.3.1.62	2.3.1.62
R01320	S-Adenosyl-L-methionine:phosphatidyl-N-dimethylethanolamine N-methyltransferase	S-Adenosyl-L-methionine:phosphatidyl-N-dimethylethanolamine N-methyltransferase	S-Adenosyl-L-methionine + Phosphatidyl-N-dimethylethanolamine <=> S-Adenosyl-L-homocysteine + Phosphatidylcholine	C00019 + C04308 <=> C00021 + C00157	KEGG	2.1.1.71	2.1.1.71
R01321	CDP-choline:1,2-diacyl-sn-glycerol cholinephosphotransferase	CDP-choline:1,2-diacyl-sn-glycerol cholinephosphotransferase	CDP-choline + 1,2-Diacyl-sn-glycerol <=> CMP + Phosphatidylcholine	C00307 + C00641 <=> C00055 + C00157	KEGG	2.7.8.2	2.7.8.2
R01322	Citrate:CoA ligase (ADP-forming)	Citrate:CoA ligase (ADP-forming)	ATP + Citrate + CoA <=> ADP + Orthophosphate + (3S)-Citryl-CoA	C00002 + C00158 + C00010 <=> C00008 + C00009 + C00566	KEGG	6.2.1.18	6.2.1.18
R01323	Acetyl-CoA:citrate CoA-transferase	Acetyl-CoA:citrate CoA-transferase	Acetyl-CoA + Citrate <=> Acetate + (3S)-Citryl-CoA	C00024 + C00158 <=> C00033 + C00566	KEGG	2.8.3.10	2.8.3.10
R01324	citrate hydroxymutase	citrate hydroxymutase	Citrate <=> Isocitrate	C00158 <=> C00311	KEGG	4.2.1.3	4.2.1.3
R01325	citrate hydro-lyase (cis-aconitate-forming)	citrate hydro-lyase (cis-aconitate-forming)	Citrate <=> cis-Aconitate + H2O	C00158 <=> C00417 + C00001	KEGG	4.2.1.3，4.2.1.4	4.2.1.3
R01326	ATP:D-mannose 6-phosphotransferase	ATP:D-mannose 6-phosphotransferase	ATP + D-Mannose <=> ADP + D-Mannose 6-phosphate	C00002 + C00159 <=> C00008 + C00275	KEGG	2.7.1.1，2.7.1.7	2.7.1.1
R01327	ITP:D-mannose 6-phosphotransferase	ITP:D-mannose 6-phosphotransferase	ITP + D-Mannose <=> IDP + D-Mannose 6-phosphate	C00081 + C00159 <=> C00104 + C00275	KEGG	2.7.1.1	2.7.1.1
R01328	Dolichyl-beta-D-mannosyl-phosphate dolichylphosphohydrolase	Dolichyl-beta-D-mannosyl-phosphate dolichylphosphohydrolase	Dolichyl phosphate D-mannose + H2O <=> Dolichyl phosphate + D-Mannose	C03862 + C00001 <=> C00110 + C00159	KEGG	3.1.4.49	3.1.4.49
R01329	Epimelibiose galactohydrolase	Epimelibiose galactohydrolase	Epimelibiose + H2O <=> D-Mannose + D-Galactose	C05400 + C00001 <=> C00159 + C00124	KEGG	3.2.1.22	3.2.1.22
R01330	dATP:D-mannose 6-phosphotransferase	dATP:D-mannose 6-phosphotransferase	dATP + D-Mannose <=> dADP + D-Mannose 6-phosphate	C00131 + C00159 <=> C00206 + C00275	KEGG	2.7.1.1	2.7.1.1
R01331	1,2-1,3-alpha-D-Mannan mannohydrolase	1,2-1,3-alpha-D-Mannan mannohydrolase	G10542 + H2O <=> D-Mannose + G10542	G10542 + C00001 <=> C00159 + G10542	KEGG	3.2.1.77，3.2.1.137	3.2.1.77
R01332	beta-D-mannan hydrolases	beta-D-mannan hydrolases	1,4-beta-D-Mannan + (n-1) H2O <=> n D-Mannose	C02492 + (n-1) C00001 <=> n C00159	KEGG	3.2.1.25，3.2.1.78	3.2.1.25
R01333	glycolaldehyde:NAD+ oxidoreductase	glycolaldehyde:NAD+ oxidoreductase	Glycolaldehyde + NAD+ + H2O <=> Glycolate + NADH + H+	C00266 + C00003 + C00001 <=> C00160 + C00004 + C00080	KEGG	1.2.1.21	1.2.1.21
R01334	2-Phosphoglycolate phosphohydrolase	2-Phosphoglycolate phosphohydrolase	2-Phosphoglycolate + H2O <=> Glycolate + Orthophosphate	C00988 + C00001 <=> C00160 + C00009	KEGG	3.1.3.18	3.1.3.18
R01335	5-hydroxy-2,4-dioxopentanoate glycolylhydrolase	5-hydroxy-2,4-dioxopentanoate glycolylhydrolase	Glycolate + Pyruvate <=> 5-Hydroxy-2,4-dioxopentanoate + H2O	C00160 + C00022 <=> C05406 + C00001	KEGG	3.7.1.-	3.7.1.-
R01336	carboxymethyloxysuccinate glycolate-lyase (fumarate-forming)	carboxymethyloxysuccinate glycolate-lyase (fumarate-forming)	Carboxymethyloxysuccinate <=> Fumarate + Glycolate	C03600 <=> C00122 + C00160	KEGG	4.2.99.12	4.2.99.12
R01337	2-Oxoaldehyde:NAD+ 2-oxidoreductase	2-Oxoaldehyde:NAD+ 2-oxidoreductase	2-Oxoaldehyde + NAD+ + H2O <=> 2-Oxo acid + NADH + H+	C00538 + C00003 + C00001 <=> C00161 + C00004 + C00080	KEGG	1.2.1.23	1.2.1.23
R01338	2-oxoaldehyde:NADP+ oxidoreductase	2-oxoaldehyde:NADP+ oxidoreductase	2-Oxoaldehyde + NADP+ + H2O <=> 2-Oxo acid + NADPH + H+	C00538 + C00006 + C00001 <=> C00161 + C00005 + C00080	KEGG	1.2.1.49	1.2.1.49
R01339	L-glutamate:2-oxo acid aminotransferase	L-glutamate:2-oxo acid aminotransferase	2-Oxo acid + L-Glutamate <=> alpha-Amino acid + 2-Oxoglutarate	C00161 + C00025 <=> C05167 + C00026	KEGG
R01340	D-Amino-acid:oxygen oxidoreductase (deaminating)	D-Amino-acid:oxygen oxidoreductase (deaminating)	D-Amino acid + H2O + Oxygen <=> 2-Oxo acid + NH3 + Hydrogen peroxide	C00405 + C00001 + C00007 <=> C00161 + C00014 + C00027	KEGG	1.4.3.3	1.4.3.3
R01341	(S)-2-Hydroxy-acid:oxygen 2-oxidoreductase	(S)-2-Hydroxy-acid:oxygen 2-oxidoreductase	(S)-2-Hydroxy acid + Oxygen <=> 2-Oxo acid + Hydrogen peroxide	C02613 + C00007 <=> C00161 + C00027	KEGG	1.1.3.15	1.1.3.15
R01342	D-Amino-acid:(acceptor) oxidoreductase (deaminating)	D-Amino-acid:(acceptor) oxidoreductase (deaminating)	alpha-Amino acid + H2O + Acceptor <=> 2-Oxo acid + NH3 + Reduced acceptor	C05167 + C00001 + C00028 <=> C00161 + C00014 + C00030	KEGG	1.4.99.1	1.4.99.1
R01343	L-Ornithine:2-oxo-acid aminotransferase	L-Ornithine:2-oxo-acid aminotransferase	L-Ornithine + 2-Oxo acid <=> L-Glutamate 5-semialdehyde + L-Amino acid	C00077 + C00161 <=> C01165 + C00151	KEGG	2.6.1.13	2.6.1.13
R01344	D-alanine:2-oxo acid aminotransferase	D-alanine:2-oxo acid aminotransferase	D-Amino acid + Pyruvate <=> 2-Oxo acid + D-Alanine	C00405 + C00022 <=> C00161 + C00133	KEGG	2.6.1.21	2.6.1.21
R01346	L-Asparagine:2-oxo-acid aminotransferase	L-Asparagine:2-oxo-acid aminotransferase	L-Asparagine + 2-Oxo acid <=> 2-Oxosuccinamate + L-Amino acid	C00152 + C00161 <=> C02362 + C00151	KEGG	2.6.1.14	2.6.1.14
R01347	Fatty acid,reduced rubredoxin:oxygen oxidoreductase (omega-hydroxylating)	Fatty acid,reduced rubredoxin:oxygen oxidoreductase (omega-hydroxylating)	Fatty acid + Oxygen + Reduced rubredoxin <=> omega-Hydroxy fatty acid + Oxidized rubredoxin + H2O	C00162 + C00007 + C00340 <=> C03547 + C00435 + C00001	KEGG	1.14.15.3	1.14.15.3
R01348	Fatty acid,reduced-flavoprotein:oxygen oxidoreductase (omega-hydroxylating)	Fatty acid,reduced-flavoprotein:oxygen oxidoreductase (omega-hydroxylating)	Fatty acid + Oxygen + Reduced flavoprotein <=> omega-Hydroxy fatty acid + Oxidized flavoprotein + H2O	C00162 + C00007 + C03024 <=> C03547 + C03161 + C00001	KEGG	1.14.15.3	1.14.15.3
R01349	S-Adenosyl-L-methionine:fatty-acid O-methyltransferase	S-Adenosyl-L-methionine:fatty-acid O-methyltransferase	S-Adenosyl-L-methionine + Fatty acid <=> S-Adenosyl-L-homocysteine + Fatty acid methyl ester	C00019 + C00162 <=> C00021 + C03395	KEGG	2.1.1.15	2.1.1.15
R01350	Glycerol acylhydrolase	Glycerol acylhydrolase	Glycerol + Fatty acid <=> Triacylglycerol	C00116 + C00162 <=> C00422	KEGG	3.1.1.34	3.1.1.34
R01351	1-acylglycerol acylhydrolase	1-acylglycerol acylhydrolase	1-Acylglycerol + H2O <=> Glycerol + Fatty acid	C01885 + C00001 <=> C00116 + C00162	KEGG	3.1.1.23	3.1.1.23
R01352	2-acylglycerol acylhydrolase	2-acylglycerol acylhydrolase	2-Acylglycerol + H2O <=> Glycerol + Fatty acid	C02112 + C00001 <=> C00116 + C00162	KEGG	3.1.1.23	3.1.1.23
R01353	ATP:propanoate phosphotransferase	ATP:propanoate phosphotransferase	ATP + Propanoate <=> ADP + Propanoyl phosphate	C00002 + C00163 <=> C00008 + C02876	KEGG	2.7.2.1，2.7.2.15	2.7.2.1
R01354	ATP:propanoate adenyltransferase	ATP:propanoate adenyltransferase	ATP + Propanoate <=> Diphosphate + Propionyladenylate	C00002 + C00163 <=> C00013 + C05983	KEGG	6.2.1.1，6.2.1.17	6.2.1.1
R01355	2,3-Dimethylmalate pyruvate-lyase	2,3-Dimethylmalate pyruvate-lyase	(2R,3S)-2,3-Dimethylmalate <=> Propanoate + Pyruvate	C03652 <=> C00163 + C00022	KEGG	4.1.3.32	4.1.3.32
R01357	Acetoacetate:CoA ligase (AMP-forming)	Acetoacetate:CoA ligase (AMP-forming)	ATP + Acetoacetate + CoA <=> AMP + Diphosphate + Acetoacetyl-CoA	C00002 + C00164 + C00010 <=> C00020 + C00013 + C00332	KEGG	6.2.1.16	6.2.1.16
R01358	Acetoacetyl-CoA hydrolase	Acetoacetyl-CoA hydrolase	Acetoacetyl-CoA + H2O <=> Acetoacetate + CoA	C00332 + C00001 <=> C00164 + C00010	KEGG	3.1.2.11	3.1.2.11
R01359	Acetoacetyl-CoA:acetate CoA-transferase	Acetoacetyl-CoA:acetate CoA-transferase	Acetoacetyl-CoA + Acetate <=> Acetoacetate + Acetyl-CoA	C00332 + C00033 <=> C00164 + C00024	KEGG	2.8.3.8	2.8.3.8
R01360	(S)-3-hydroxy-3-methylglutaryl-CoA acetoacetate-lyase (acetyl-CoA-forming)	(S)-3-hydroxy-3-methylglutaryl-CoA acetoacetate-lyase (acetyl-CoA-forming)	(S)-3-Hydroxy-3-methylglutaryl-CoA <=> Acetyl-CoA + Acetoacetate	C00356 <=> C00024 + C00164	KEGG	4.1.3.4	4.1.3.4
R01361	(R)-3-Hydroxybutanoate:NAD+ oxidoreductase	(R)-3-Hydroxybutanoate:NAD+ oxidoreductase	(R)-3-Hydroxybutanoate + NAD+ <=> Acetoacetate + NADH + H+	C01089 + C00003 <=> C00164 + C00004 + C00080	KEGG	1.1.1.30	1.1.1.30
R01364	4-fumarylacetoacetate fumarylhydrolase	4-fumarylacetoacetate fumarylhydrolase	Acetoacetate + Fumarate <=> 4-Fumarylacetoacetate + H2O	C00164 + C00122 <=> C01061 + C00001	KEGG	3.7.1.2	3.7.1.2
R01365	Butanoyl-CoA:acetoacetate CoA-transferase	Butanoyl-CoA:acetoacetate CoA-transferase	Butanoyl-CoA + Acetoacetate <=> Butanoic acid + Acetoacetyl-CoA	C00136 + C00164 <=> C00246 + C00332	KEGG	2.8.3.9	2.8.3.9
R01366	Acetoacetate carboxy-lyase (acetone-forming)	Acetoacetate carboxy-lyase (acetone-forming)	Acetoacetate <=> Acetone + CO2	C00164 <=> C00207 + C00011	KEGG	4.1.1.4	4.1.1.4
R01367	Acetoacetate hydro-lyase (3-butynoate-forming)	Acetoacetate hydro-lyase (3-butynoate-forming)	Acetoacetate <=> 3-Butynoate + H2O	C00164 <=> C06144 + C00001	KEGG	4.2.1.27	4.2.1.27
R01368	Acyl-CoA:2-acylglycerol O-acyltransferase	Acyl-CoA:2-acylglycerol O-acyltransferase	Acyl-CoA + 2-Acylglycerol <=> CoA + Diacylglycerol	C00040 + C02112 <=> C00010 + C00165	KEGG	2.3.1.22	2.3.1.22
R01369	triacylglycerol acylhydrolase	triacylglycerol acylhydrolase	Triacylglycerol + H2O <=> Diacylglycerol + Carboxylate	C00422 + C00001 <=> C00165 + C00060	KEGG	3.1.1.3，3.1.1.34，3.1.1.79	3.1.1.3
R01370	Phenyllactate:NAD+ oxidoreductase	Phenyllactate:NAD+ oxidoreductase	Phenyllactate + NAD+ <=> Phenylpyruvate + NADH + H+	C05607 + C00003 <=> C00166 + C00004 + C00080	KEGG	1.1.1.222，1.1.1.237	1.1.1.222
R01371	Phenyllactate:NADP+ oxidoreductase	Phenyllactate:NADP+ oxidoreductase	Phenyllactate + NADP+ <=> Phenylpyruvate + NADPH + H+	C05607 + C00006 <=> C00166 + C00005 + C00080	KEGG	1.1.1.222，1.1.1.237	1.1.1.222
R01372	Phenylpyruvate:oxygen oxidoreductase (hydroxylating,decarboxylating)	Phenylpyruvate:oxygen oxidoreductase (hydroxylating,decarboxylating)	Phenylpyruvate + Oxygen <=> 2-Hydroxyphenylacetate + CO2	C00166 + C00007 <=> C05852 + C00011	KEGG	1.13.11.27	1.13.11.27
R01373	prephenate hydro-lyase (decarboxylating; phenylpyruvate-forming)	prephenate hydro-lyase (decarboxylating; phenylpyruvate-forming)	Prephenate <=> Phenylpyruvate + H2O + CO2	C00254 <=> C00166 + C00001 + C00011	KEGG	4.2.1.51，4.2.1.91	4.2.1.51
R01374	D-phenylalanine:acceptor oxidoreductase (deaminating)	D-phenylalanine:acceptor oxidoreductase (deaminating)	D-Phenylalanine + H2O + Acceptor <=> Phenylpyruvate + NH3 + Reduced acceptor	C02265 + C00001 + C00028 <=> C00166 + C00014 + C00030	KEGG	1.4.99.1	1.4.99.1
R01375	L-Glutamine:phenylpyruvate aminotransferase	L-Glutamine:phenylpyruvate aminotransferase	L-Glutamine + Phenylpyruvate <=> 2-Oxoglutaramate + L-Phenylalanine	C00064 + C00166 <=> C00940 + C00079	KEGG	2.6.1.64	2.6.1.64
R01376	L-Tryptophan:phenylpyruvate aminotransferase	L-Tryptophan:phenylpyruvate aminotransferase	L-Tryptophan + Phenylpyruvate <=> Indolepyruvate + L-Phenylalanine	C00078 + C00166 <=> C00331 + C00079	KEGG	2.6.1.28	2.6.1.28
R01377	phenylpyruvate carboxy-lyase (phenylacetaldehyde-forming)	phenylpyruvate carboxy-lyase (phenylacetaldehyde-forming)	Phenylpyruvate <=> Phenylacetaldehyde + CO2	C00166 <=> C00601 + C00011	KEGG	4.1.1.43，4.1.1.-	4.1.1.43
R01378	Phenylpyruvate keto-enol-isomerase	Phenylpyruvate keto-enol-isomerase	Phenylpyruvate <=> 2-Hydroxy-3-phenylpropenoate	C00166 <=> C02763	KEGG	5.3.2.1	5.3.2.1
R01381	UTP:1-phospho-alpha-D-glucuronate uridylyltransferase	UTP:1-phospho-alpha-D-glucuronate uridylyltransferase	UTP + D-Glucuronate 1-phosphate <=> Diphosphate + UDP-glucuronate	C00075 + C05385 <=> C00013 + C00167	KEGG	2.7.7.44	2.7.7.44
R01383	UDPglucuronate beta-D-glucuronosyltransferase (acceptor-unspecific)	UDPglucuronate beta-D-glucuronosyltransferase (acceptor-unspecific)	UDP-glucuronate + ROH <=> UDP + beta-D-Glucuronoside	C00167 + C01335 <=> C00015 + C03033	KEGG	2.4.1.17	2.4.1.17
R01384	UDP-D-glucuronate carboxy-lyase (UDP-D-xylose-forming)	UDP-D-glucuronate carboxy-lyase (UDP-D-xylose-forming)	UDP-glucuronate <=> UDP-D-xylose + CO2	C00167 <=> C00190 + C00011	KEGG	4.1.1.35	4.1.1.35
R01385	UDP-glucuronate 4-epimerase	UDP-glucuronate 4-epimerase	UDP-glucuronate <=> UDP-D-galacturonate	C00167 <=> C00617	KEGG	5.1.3.6	5.1.3.6
R01386	UDP-D-glucuronate carboxy-lyase (UDP-D-apiose-forming)	UDP-D-glucuronate carboxy-lyase (UDP-D-apiose-forming)	UDP-glucuronate <=> UDP-apiose + CO2	C00167 <=> C01623 + C00011	KEGG
R01387	UDP-glucuronate 5'-epimerase	UDP-glucuronate 5'-epimerase	UDP-glucuronate <=> UDP-L-iduronate	C00167 <=> C02330	KEGG	5.1.3.12	5.1.3.12
R01388	D-Glycerate:NAD+ 2-oxidoreductase	D-Glycerate:NAD+ 2-oxidoreductase	D-Glycerate + NAD+ <=> Hydroxypyruvate + NADH + H+	C00258 + C00003 <=> C00168 + C00004 + C00080	KEGG	1.1.1.26，1.1.1.29，1.1.1.81	1.1.1.26
R01390	NO NAME	NO NAME	Hydroxypyruvate + CO2 <=> Dihydroxyfumarate	C00168 + C00011 <=> C00975	KEGG
R01392	D-Glycerate:NADP+ 2-oxidoreductase	D-Glycerate:NADP+ 2-oxidoreductase	D-Glycerate + NADP+ <=> Hydroxypyruvate + NADPH + H+	C00258 + C00006 <=> C00168 + C00005 + C00080	KEGG	1.1.1.79，1.1.1.81	1.1.1.79
R01393	hydroxypyruvate carboxy-lyase (glycolaldehyde-forming)	hydroxypyruvate carboxy-lyase (glycolaldehyde-forming)	Hydroxypyruvate <=> Glycolaldehyde + CO2	C00168 <=> C00266 + C00011	KEGG	4.1.1.40	4.1.1.40
R01394	hydroxypyruvate aldose-ketose-isomerase	hydroxypyruvate aldose-ketose-isomerase	Hydroxypyruvate <=> 2-Hydroxy-3-oxopropanoate	C00168 <=> C01146	KEGG	5.3.1.22	5.3.1.22
R01395	ATP:carbamate phosphotransferase	ATP:carbamate phosphotransferase	ATP + Carbamate <=> ADP + Carbamoyl phosphate	C00002 + C01563 <=> C00008 + C00169	KEGG	2.7.2.2	2.7.2.2
R01396	Carbamoyl-phosphate:L-lysine carbamoyltransferase	Carbamoyl-phosphate:L-lysine carbamoyltransferase	Carbamoyl phosphate + L-Lysine <=> Orthophosphate + L-Homocitrulline	C00169 + C00047 <=> C00009 + C02427	KEGG	2.1.3.8	2.1.3.8
R01397	carbamoyl-phosphate:L-aspartate carbamoyltransferase	carbamoyl-phosphate:L-aspartate carbamoyltransferase	Carbamoyl phosphate + L-Aspartate <=> Orthophosphate + N-Carbamoyl-L-aspartate	C00169 + C00049 <=> C00009 + C00438	KEGG	2.1.3.2	2.1.3.2
R01398	Carbamoyl-phosphate:L-ornithine carbamoyltransferase	Carbamoyl-phosphate:L-ornithine carbamoyltransferase	Carbamoyl phosphate + L-Ornithine <=> Orthophosphate + L-Citrulline	C00169 + C00077 <=> C00009 + C00327	KEGG	2.1.3.3	2.1.3.3
R01399	Carbamoyl-phosphate:putrescine carbamoyltransferase	Carbamoyl-phosphate:putrescine carbamoyltransferase	Carbamoyl phosphate + Putrescine <=> Orthophosphate + N-Carbamoylputrescine	C00169 + C00134 <=> C00009 + C00436	KEGG	2.1.3.6	2.1.3.6
R01400	NO NAME	NO NAME	Carbamoyl phosphate <=> Cyclic amidines	C00169 <=> C06059	KEGG
R01401	Methylthioadenosine methylthioribohydrolase	Methylthioadenosine methylthioribohydrolase	5'-Methylthioadenosine + H2O <=> Adenine + 5-Methylthio-D-ribose	C00170 + C00001 <=> C00147 + C03089	KEGG	3.2.2.9，3.2.2.16	3.2.2.9
R01402	S-methyl-5'-thioadenosine:phosphate S-methyl-5-thio-alpha-D-ribosyl-transferase	S-methyl-5'-thioadenosine:phosphate S-methyl-5-thio-alpha-D-ribosyl-transferase	5'-Methylthioadenosine + Orthophosphate <=> Adenine + S-Methyl-5-thio-D-ribose 1-phosphate	C00170 + C00009 <=> C00147 + C04188	KEGG	2.4.2.28	2.4.2.28
R01403	acyl-[acyl-carrier-protein]:NAD+ oxidoreductase	acyl-[acyl-carrier-protein]:NAD+ oxidoreductase	Acyl-[acyl-carrier protein] + NAD+ <=> trans-2,3-Dehydroacyl-[acyl-carrier protein] + NADH + H+	C00173 + C00003 <=> C00693 + C00004 + C00080	KEGG	1.3.1.9	1.3.1.9
R01404	Acyl-[acyl-carrier protein]:NADP+ oxidoreductase	Acyl-[acyl-carrier protein]:NADP+ oxidoreductase	Acyl-[acyl-carrier protein] + NADP+ <=> trans-2,3-Dehydroacyl-[acyl-carrier protein] + NADPH + H+	C00173 + C00006 <=> C00693 + C00005 + C00080	KEGG	1.3.1.10，1.3.1.39	1.3.1.10
R01406	Long-chain-fatty-acid:[acyl-carrier-protein] ligase (AMP-forming)	Long-chain-fatty-acid:[acyl-carrier-protein] ligase (AMP-forming)	ATP + Long-chain fatty acid + Acyl-carrier protein <=> AMP + Diphosphate + Acyl-[acyl-carrier protein]	C00002 + C00638 + C00229 <=> C00020 + C00013 + C00173	KEGG	6.2.1.20	6.2.1.20
R01407	Acid:protein ligase (AMP-forming)	Acid:protein ligase (AMP-forming)	ATP + Acid + Protein <=> AMP + Diphosphate + Acyl-protein thioester	C00002 + C00174 + C00017 <=> C00020 + C00013 + C03371	KEGG	6.2.1.19	6.2.1.19
R01408	formamide hydro-lyase (cyanide-forming)	formamide hydro-lyase (cyanide-forming)	Formamide <=> Hydrogen cyanide + H2O	C00488 <=> C01326 + C00001	KEGG	4.2.1.66	4.2.1.66
R01409	Cyanohydrin aldehyde-lyase (cyanide-forming)	Cyanohydrin aldehyde-lyase (cyanide-forming)	Cyanohydrin <=> Cyanide + Aldehyde	C05712 <=> C00177 + C00071	KEGG	4.1.2.10，4.1.2.11，4.1.2.47	4.1.2.10
R01410	NO NAME	NO NAME	Cyanide + Acetaldehyde + NH3 <=> alpha-Aminopropiononitrile + H2O	C00177 + C00084 + C00014 <=> C05714 + C00001	KEGG
R01411	5-Methylcytosine aminohydrolase	5-Methylcytosine aminohydrolase	5-Methylcytosine + H2O <=> Thymine + NH3	C02376 + C00001 <=> C00178 + C00014	KEGG	3.5.4.1	3.5.4.1
R01412	Thymine,2-oxoglutarate:oxygen oxidoreductase (7-hydroxylating)	Thymine,2-oxoglutarate:oxygen oxidoreductase (7-hydroxylating)	Thymine + 2-Oxoglutarate + Oxygen <=> 5-Hydroxymethyluracil + Succinate + CO2	C00178 + C00026 + C00007 <=> C03088 + C00042 + C00011	KEGG	1.14.11.6	1.14.11.6
R01413	thymine:acceptor oxidoreductase	thymine:acceptor oxidoreductase	Thymine + Acceptor + H2O <=> 5-Methylbarbiturate + Reduced acceptor	C00178 + C00028 + C00001 <=> C05281 + C00030	KEGG	1.17.99.4	1.17.99.4
R01414	5,6-Dihydrothymine:NAD+ oxidoreductase	5,6-Dihydrothymine:NAD+ oxidoreductase	5,6-Dihydrothymine + NAD+ <=> Thymine + NADH + H+	C00906 + C00003 <=> C00178 + C00004 + C00080	KEGG	1.3.1.1	1.3.1.1
R01415	5,6-Dihydrothymine:NADP+ oxidoreductase	5,6-Dihydrothymine:NADP+ oxidoreductase	5,6-Dihydrothymine + NADP+ <=> Thymine + NADPH + H+	C00906 + C00006 <=> C00178 + C00005 + C00080	KEGG	1.3.1.2	1.3.1.2
R01416	Agmatine iminohydrolase	Agmatine iminohydrolase	Agmatine + H2O <=> N-Carbamoylputrescine + NH3	C00179 + C00001 <=> C00436 + C00014	KEGG	3.5.3.12	3.5.3.12
R01417	ATP:agmatine N4-phosphotransferase	ATP:agmatine N4-phosphotransferase	ATP + Agmatine <=> ADP + N4-Phosphoagmatine	C00002 + C00179 <=> C00008 + C02726	KEGG	2.7.3.10	2.7.3.10
R01418	1,4-diguanidinobutane amidinohydrolase	1,4-diguanidinobutane amidinohydrolase	Agmatine + Urea <=> 1,4-Diguanidinobutane + H2O	C00179 + C00086 <=> C03047 + C00001	KEGG	3.5.3.20	3.5.3.20
R01419	Benzaldehyde:NAD+ oxidoreductase	Benzaldehyde:NAD+ oxidoreductase	Benzaldehyde + NAD+ + H2O <=> Benzoate + NADH + H+	C00261 + C00003 + C00001 <=> C00180 + C00004 + C00080	KEGG	1.2.1.28	1.2.1.28
R01420	benzaldehyde:NADP+ oxidoreductase	benzaldehyde:NADP+ oxidoreductase	Benzaldehyde + NADP+ + H2O <=> Benzoate + NADPH + H+	C00261 + C00006 + C00001 <=> C00180 + C00005 + C00080	KEGG	1.2.1.7	1.2.1.7
R01421	Benzoyl phosphate phosphohydrolase	Benzoyl phosphate phosphohydrolase	Benzoyl phosphate + H2O <=> Benzoate + Orthophosphate	C06206 + C00001 <=> C00180 + C00009	KEGG	3.6.1.7	3.6.1.7
R01422	Benzoate:CoA ligase (AMP-forming)	Benzoate:CoA ligase (AMP-forming)	ATP + Benzoate + CoA <=> AMP + Diphosphate + S-Benzoate coenzyme A	C00002 + C00180 + C00010 <=> C00020 + C00013 + C00512	KEGG	6.2.1.25	6.2.1.25
R01423	5'-Benzoylphosphoadenosine benzoylhydrolase	5'-Benzoylphosphoadenosine benzoylhydrolase	5'-Benzoylphosphoadenosine + H2O <=> AMP + Benzoate	C06433 + C00001 <=> C00020 + C00180	KEGG	3.6.1.20	3.6.1.20
R01424	N-Benzoylglycine amidohydrolase	N-Benzoylglycine amidohydrolase	Hippurate + H2O <=> Benzoate + Glycine	C01586 + C00001 <=> C00180 + C00037	KEGG	3.5.1.32	3.5.1.32
R01425	Benzoylagmatine amidohydrolase	Benzoylagmatine amidohydrolase	Benzoylagmatine + H2O <=> Benzoate + Agmatine	C02253 + C00001 <=> C00180 + C00179	KEGG	3.5.1.40	3.5.1.40
R01426	NO NAME	NO NAME	Benzoate + Acetate + NADH + H+ <=> trans-Cinnamate + 2 H2O + NAD+	C00180 + C00033 + C00004 + C00080 <=> C00423 + 2 C00001 + C00003	KEGG
R01427	NO NAME	NO NAME	Benzoate <=> 3-Hydroxybenzoate	C00180 <=> C00587	KEGG
R01429	D-xylose:NAD+ 1-oxidoreductase	D-xylose:NAD+ 1-oxidoreductase	D-Xylose + NAD+ <=> D-Xylonolactone + NADH + H+	C00181 + C00003 <=> C02266 + C00004 + C00080	KEGG	1.1.1.121，1.1.1.175	1.1.1.121
R01430	D-xylose:NADP+ 1-oxidoreductase	D-xylose:NADP+ 1-oxidoreductase	D-Xylose + NADP+ <=> D-Xylonolactone + NADPH + H+	C00181 + C00006 <=> C02266 + C00005 + C00080	KEGG	1.1.1.179	1.1.1.179
R01431	Xylitol:NADP+ oxidoreductase	Xylitol:NADP+ oxidoreductase	Xylitol + NADP+ <=> D-Xylose + NADPH + H+	C00379 + C00006 <=> C00181 + C00005 + C00080	KEGG	1.1.1.21	1.1.1.21
R01432	D-xylose aldose-ketose-isomerase	D-xylose aldose-ketose-isomerase	D-Xylose <=> D-Xylulose	C00181 <=> C00310	KEGG	5.3.1.5	5.3.1.5
R01433	D-Xylose xylohydrolase	D-Xylose xylohydrolase	D-Xylose + 1,4-beta-D-Xylan <=> 1,4-beta-D-Xylan + H2O	C00181 + C02352 <=> C02352 + C00001	KEGG	3.2.1.37	3.2.1.37
R01434	L-Valine:NAD+ oxidoreductase(deaminating)	L-Valine:NAD+ oxidoreductase(deaminating)	L-Valine + H2O + NAD+ <=> 3-Methyl-2-oxobutanoic acid + NH3 + NADH + H+	C00183 + C00001 + C00003 <=> C00141 + C00014 + C00004 + C00080	KEGG	1.4.1.9	1.4.1.9
R01437	L-valine carboxy-lyase (2-methylpropanamine-forming)	L-valine carboxy-lyase (2-methylpropanamine-forming)	L-Valine <=> 2-Methylpropanamine + CO2	C00183 <=> C02787 + C00011	KEGG	4.1.1.14	4.1.1.14
R01438	NO NAME	NO NAME	L-Valine <=> (S)-Methylmalonate semialdehyde	C00183 <=> C06002	KEGG
R01440	D-Xylulose-5-phosphate:formaldehyde glycolaldehydetransferase	D-Xylulose-5-phosphate:formaldehyde glycolaldehydetransferase	D-Xylulose 5-phosphate + Formaldehyde <=> D-Glyceraldehyde 3-phosphate + Glycerone	C00231 + C00067 <=> C00118 + C00184	KEGG	2.2.1.3	2.2.1.3
R01441	ATP:cellobiose 6-phosphotransferase	ATP:cellobiose 6-phosphotransferase	ATP + Cellobiose <=> ADP + 6-Phospho-beta-D-glucosyl-(1,4)-D-glucose	C00002 + C00185 <=> C00008 + C04534	KEGG	2.7.1.85	2.7.1.85
R01442	Cellobiose:oxygen 1-oxidoreductase	Cellobiose:oxygen 1-oxidoreductase	Cellobiose + Oxygen <=> Cellobiono-1,5-lactone + Hydrogen peroxide	C00185 + C00007 <=> C01093 + C00027	KEGG	1.1.99.18	1.1.99.18
R01443	Cellobiose:(acceptor) 1-oxidoreductase	Cellobiose:(acceptor) 1-oxidoreductase	Cellobiose + Acceptor <=> Cellobiono-1,5-lactone + Reduced acceptor	C00185 + C00028 <=> C01093 + C00030	KEGG	1.1.99.18	1.1.99.18
R01444	cellotriose glucohydrolase	cellotriose glucohydrolase	Cellotriose + H2O <=> Cellobiose + D-Glucose	C06219 + C00001 <=> C00185 + C00031	KEGG	3.2.1.74	3.2.1.74
R01445	Cellobiose 2-epimerase	Cellobiose 2-epimerase	Cellobiose <=> D-Glucosyl-D-mannose	C00185 <=> C02964	KEGG	5.1.3.11	5.1.3.11
R01446	(S)-lactaldehyde:NAD+ oxidoreductase	(S)-lactaldehyde:NAD+ oxidoreductase	(S)-Lactaldehyde + NAD+ + H2O <=> (S)-Lactate + NADH + H+	C00424 + C00003 + C00001 <=> C00186 + C00004 + C00080	KEGG	1.2.1.22	1.2.1.22
R01447	(S)-Lactate:oxaloacetate oxidoreductase	(S)-Lactate:oxaloacetate oxidoreductase	(S)-Lactate + Oxaloacetate <=> (S)-Malate + Pyruvate	C00186 + C00036 <=> C00149 + C00022	KEGG	1.1.99.7	1.1.99.7
R01448	(R)-2-O-sulfolactate 2-sulfohydrolase	(R)-2-O-sulfolactate 2-sulfohydrolase	(R)-2-O-Sulfolactate + H2O <=> (R)-Lactate + Sulfate	C17205 + C00001 <=> C00256 + C00059	KEGG	3.1.6.17	3.1.6.17
R01449	lactoyl-CoA:propanoate CoA-transferase	lactoyl-CoA:propanoate CoA-transferase	Lactoyl-CoA + Propanoate <=> (S)-Lactate + Propanoyl-CoA	C00827 + C00163 <=> C00186 + C00100	KEGG	2.8.3.1	2.8.3.1
R01450	lactate racemase	lactate racemase	(S)-Lactate <=> (R)-Lactate	C00186 <=> C00256	KEGG	5.1.2.1	5.1.2.1
R01451	Cholesterol:NAD+ delta7-oxidoreductase	Cholesterol:NAD+ delta7-oxidoreductase	Cholesterol + NAD+ <=> 7-Dehydrocholesterol + NADH + H+	C00187 + C00003 <=> C01164 + C00004 + C00080	KEGG	1.3.1.21	1.3.1.21
R01452	cholesterol,NADPH:oxygen oxidoreductase (5alpha,6alpha-epoxidizing)	cholesterol,NADPH:oxygen oxidoreductase (5alpha,6alpha-epoxidizing)	Cholesterol + Oxygen + NADPH + H+ <=> Cholesterol-5alpha,6alpha-epoxide + NADP+ + H2O	C00187 + C00007 + C00005 + C00080 <=> C15992 + C00006 + C00001	KEGG	1.14.13.-	1.14.13.-
R01453	cholesterol,NADPH:oxygen oxidoreductase (5beta,6beta-epoxidizing)	cholesterol,NADPH:oxygen oxidoreductase (5beta,6beta-epoxidizing)	Cholesterol + Oxygen + NADPH + H+ <=> Cholesterol-5beta,6beta-epoxide + NADP+ + H2O	C00187 + C00007 + C00005 + C00080 <=> C05418 + C00006 + C00001	KEGG	1.14.13.-	1.14.13.-
R01454	Cholesterol:oxygen oxidoreductase (side-chain-cleaving)	Cholesterol:oxygen oxidoreductase (side-chain-cleaving)	Cholesterol + Oxygen + H+ + 2 Reduced adrenal ferredoxin <=> 20alpha-Hydroxycholesterol + H2O + 2 Oxidized adrenal ferredoxin	C00187 + C00007 + C00080 + 2 C00662 <=> C05500 + C00001 + 2 C00667	KEGG	1.14.15.6	1.14.15.6
R01456	Cholesterol:NADP+ delta7-oxidoreductase	Cholesterol:NADP+ delta7-oxidoreductase	Cholesterol + NADP+ <=> 7-Dehydrocholesterol + NADPH + H+	C00187 + C00006 <=> C01164 + C00005 + C00080	KEGG	1.3.1.21	1.3.1.21
R01457	cholesterol:NADP+ Delta24-oxidoreductase	cholesterol:NADP+ Delta24-oxidoreductase	Cholesterol + NADP+ <=> Desmosterol + H+ + NADPH	C00187 + C00006 <=> C01802 + C00080 + C00005	KEGG	1.3.1.72	1.3.1.72
R01459	Cholesterol:oxygen oxidoreductase	Cholesterol:oxygen oxidoreductase	Cholesterol + Oxygen <=> Cholest-4-en-3-one + Hydrogen peroxide	C00187 + C00007 <=> C00599 + C00027	KEGG	1.1.3.6	1.1.3.6
R01460	Cholesteryl-beta-D-glucoside glucohydrolase	Cholesteryl-beta-D-glucoside glucohydrolase	Cholesteryl-beta-D-glucoside + H2O <=> Cholesterol + D-Glucose	C03855 + C00001 <=> C00187 + C00031	KEGG	3.2.1.104	3.2.1.104
R01461	Acyl-CoA:cholesterol O-acyltransferase	Acyl-CoA:cholesterol O-acyltransferase	Acyl-CoA + Cholesterol <=> CoA + Cholesterol ester	C00040 + C00187 <=> C00010 + C02530	KEGG	2.3.1.26	2.3.1.26
R01462	cholesterol ester acylhydrolase	cholesterol ester acylhydrolase	Cholesterol ester + H2O <=> Cholesterol + Fatty acid	C02530 + C00001 <=> C00187 + C00162	KEGG	3.1.1.13	3.1.1.13
R01463	Cholesterol,NADPH:oxygen oxidoreductase (7alpha-hydroxylating)	Cholesterol,NADPH:oxygen oxidoreductase (7alpha-hydroxylating)	Cholesterol + Oxygen + NADPH + H+ <=> 7alpha-Hydroxycholesterol + NADP+ + H2O	C00187 + C00007 + C00005 + C00080 <=> C03594 + C00006 + C00001	KEGG	1.14.13.17	1.14.13.17
R01465	L-Threonine:NAD+ oxidoreductase	L-Threonine:NAD+ oxidoreductase	L-Threonine + NAD+ <=> L-2-Amino-3-oxobutanoic acid + NADH + H+	C00188 + C00003 <=> C03508 + C00004 + C00080	KEGG	1.1.1.103	1.1.1.103
R01466	O-phospho-L-homoserine phosphate-lyase (adding water;L-threonine-forming)	O-phospho-L-homoserine phosphate-lyase (adding water;L-threonine-forming)	O-Phospho-L-homoserine + H2O <=> L-Threonine + Orthophosphate	C01102 + C00001 <=> C00188 + C00009	KEGG	4.2.3.1	4.2.3.1
R01467	Threonine racemase	Threonine racemase	L-Threonine <=> D-Threonine	C00188 <=> C00820	KEGG	5.1.1.6	5.1.1.6
R01468	ATP:ethanolamine O-phosphotransferase	ATP:ethanolamine O-phosphotransferase	ATP + Ethanolamine <=> ADP + Ethanolamine phosphate	C00002 + C00189 <=> C00008 + C00346	KEGG	2.7.1.82	2.7.1.82
R01469	Ethanolamine:oxygen oxidoreductase (deaminating)	Ethanolamine:oxygen oxidoreductase (deaminating)	Ethanolamine + H2O + Oxygen <=> Glycolaldehyde + NH3 + Hydrogen peroxide	C00189 + C00001 + C00007 <=> C00266 + C00014 + C00027	KEGG	1.4.3.8	1.4.3.8
R01470	sn-Glycero-3-phosphoethanolamine glycerophosphohydrolase	sn-Glycero-3-phosphoethanolamine glycerophosphohydrolase	sn-glycero-3-Phosphoethanolamine + H2O <=> Ethanolamine + sn-Glycerol 3-phosphate	C01233 + C00001 <=> C00189 + C00093	KEGG	3.1.4.2，3.1.4.46	3.1.4.2
R01471	UTP:alpha-D-xylose-1-phosphate uridylyltransferase	UTP:alpha-D-xylose-1-phosphate uridylyltransferase	UTP + alpha-D-Xylose 1-phosphate <=> Diphosphate + UDP-D-xylose	C00075 + C03737 <=> C00013 + C00190	KEGG	2.7.7.11	2.7.7.11
R01472	UDP-D-xylose:dolichyl-phosphate D-xylosyltrtansferase	UDP-D-xylose:dolichyl-phosphate D-xylosyltrtansferase	UDP-D-xylose + Dolichyl phosphate <=> UDP + Dolichyl D-xylosyl phosphate	C00190 + C00110 <=> C00015 + C01191	KEGG	2.4.2.32	2.4.2.32
R01473	UDP-L-arabinose 4-epimerase	UDP-L-arabinose 4-epimerase	UDP-L-arabinose <=> UDP-D-xylose	C00935 <=> C00190	KEGG	5.1.3.5	5.1.3.5
R01474	NO NAME	NO NAME	UDP-D-xylose <=> Pentosan + UDP	C00190 <=> C06016 + C00015	KEGG
R01476	ATP:D-glucuronate 1-phosphotransferase	ATP:D-glucuronate 1-phosphotransferase	ATP + D-Glucuronate <=> ADP + D-Glucuronate 1-phosphate	C00002 + C00191 <=> C00008 + C05385	KEGG	2.7.1.43	2.7.1.43
R01478	beta-D-glucuronoside glucuronosohydrolase	beta-D-glucuronoside glucuronosohydrolase	H2O + beta-D-Glucuronoside <=> D-Glucuronate + Alcohol	C00001 + C03033 <=> C00191 + C00069	KEGG	3.2.1.31	3.2.1.31
R01480	alpha-D-Glucosiduronate glucuronohydrolase	alpha-D-Glucosiduronate glucuronohydrolase	alpha-D-Glucuronoside + H2O <=> Alcohol + D-Glucuronate	C06370 + C00001 <=> C00069 + C00191	KEGG	3.2.1.139	3.2.1.139
R01481	L-Gulonate:NADP+ 6-oxidoreductase	L-Gulonate:NADP+ 6-oxidoreductase	L-Gulonate + NADP+ <=> D-Glucuronate + NADPH + H+	C00800 + C00006 <=> C00191 + C00005 + C00080	KEGG	1.1.1.19	1.1.1.19
R01482	D-glucuronate aldose-ketose-isomerase	D-glucuronate aldose-ketose-isomerase	D-Glucuronate <=> D-Fructuronate	C00191 <=> C00905	KEGG	5.3.1.12	5.3.1.12
R01483	D-Glucuronolactone lactonohydrolase	D-Glucuronolactone lactonohydrolase	D-Glucuronolactone + H2O <=> D-Glucuronate	C02670 + C00001 <=> C00191	KEGG	3.1.1.19	3.1.1.19
R01484	D-Glucurono-6,2-lactone lactonohydrolase	D-Glucurono-6,2-lactone lactonohydrolase	D-Glucurono-6,2-lactone + H2O <=> D-Glucuronate	C03387 + C00001 <=> C00191	KEGG	3.1.1.19	3.1.1.19
R01485	L-Asparagine:hydroxylamine gamma-aspartyltransferase	L-Asparagine:hydroxylamine gamma-aspartyltransferase	L-Asparagine + Hydroxylamine <=> NH3 + beta-L-Aspartylhydroxamate	C00152 + C00192 <=> C00014 + C03124	KEGG	2.3.2.7	2.3.2.7
R01486	aromatic aldehyde:NAD+ oxidoreductase	aromatic aldehyde:NAD+ oxidoreductase	Aromatic aldehyde + NAD+ + H2O <=> Aromatic acid + NADH + H+	C00193 + C00003 + C00001 <=> C00539 + C00004 + C00080	KEGG	1.2.1.29	1.2.1.29
R01487	Aromatic alcohol:NAD+ oxidoreductase	Aromatic alcohol:NAD+ oxidoreductase	Aromatic primary alcohol + NAD+ <=> Aromatic aldehyde + NADH + H+	C03485 + C00003 <=> C00193 + C00004 + C00080	KEGG	1.1.1.90	1.1.1.90
R01488	Aromatic alcohol:NADP+ oxidoreductase	Aromatic alcohol:NADP+ oxidoreductase	Aromatic primary alcohol + NADP+ <=> Aromatic aldehyde + NADPH + H+	C03485 + C00006 <=> C00193 + C00005 + C00080	KEGG	1.1.1.91	1.1.1.91
R01489	aromatic aldehyde:oxygen oxidoreductase	aromatic aldehyde:oxygen oxidoreductase	Aromatic aldehyde + Oxygen + H2O <=> Aromatic acid + Hydrogen peroxide	C00193 + C00007 + C00001 <=> C00539 + C00027	KEGG	1.2.3.9	1.2.3.9
R01490	aromatic aldehyde:NADP+ oxidoreductase (ATP-forming)	aromatic aldehyde:NADP+ oxidoreductase (ATP-forming)	Aromatic aldehyde + AMP + Diphosphate + NADP+ <=> Aromatic acid + NADPH + ATP + H+	C00193 + C00020 + C00013 + C00006 <=> C00539 + C00005 + C00002 + C00080	KEGG	1.2.1.30	1.2.1.30
R01491	aromatic alcohol:oxygen oxidoreductase	aromatic alcohol:oxygen oxidoreductase	Aromatic primary alcohol + Oxygen <=> Aromatic aldehyde + Hydrogen peroxide	C03485 + C00007 <=> C00193 + C00027	KEGG	1.1.3.7	1.1.3.7
R01492	ATP:cob(I)alamin Co-beta-adenosyltransferase	ATP:cob(I)alamin Co-beta-adenosyltransferase	ATP + Cob(I)alamin <=> Triphosphate + Cobamide coenzyme	C00002 + C00853 <=> C00536 + C00194	KEGG	2.5.1.17	2.5.1.17
R01493	N-Acylsphingosine amidohydrolase	N-Acylsphingosine amidohydrolase	N-Acylsphingosine + H2O <=> Carboxylate + Sphingosine	C00195 + C00001 <=> C00060 + C00319	KEGG	3.5.1.23	3.5.1.23
R01494	N-Acylsphingosine amidohydrolase	N-Acylsphingosine amidohydrolase	N-Acylsphingosine + H2O <=> Fatty acid + Sphingosine	C00195 + C00001 <=> C00162 + C00319	KEGG	3.5.1.23	3.5.1.23
R01495	ATP:ceramide 1-phosphotransferase	ATP:ceramide 1-phosphotransferase	ATP + N-Acylsphingosine <=> ADP + Ceramide 1-phosphate	C00002 + C00195 <=> C00008 + C02960	KEGG	2.7.1.138	2.7.1.138
R01496	Acyl-CoA:sphingosine N-acyltransferase	Acyl-CoA:sphingosine N-acyltransferase	Acyl-CoA + Sphingosine <=> CoA + N-Acylsphingosine	C00040 + C00319 <=> C00010 + C00195	KEGG	2.3.1.24	2.3.1.24
R01497	UDP-glucose:N-acylsphingosine D-glucosyltransferase	UDP-glucose:N-acylsphingosine D-glucosyltransferase	UDP-glucose + N-Acylsphingosine <=> UDP + Glucosylceramide	C00029 + C00195 <=> C00015 + C01190	KEGG	2.4.1.80	2.4.1.80
R01498	D-Glucosyl-N-acylsphingosine glucohydrolase	D-Glucosyl-N-acylsphingosine glucohydrolase	Glucosylceramide + H2O <=> D-Glucose + N-Acylsphingosine	C01190 + C00001 <=> C00031 + C00195	KEGG	3.2.1.45，3.2.1.62	3.2.1.45
R01500	UDP-galactose:N-acylsphingosine D-galactosyltransferase	UDP-galactose:N-acylsphingosine D-galactosyltransferase	UDP-D-galactose + N-Acylsphingosine <=> UDP + Galactosylceramide	C00052 + C00195 <=> C00015 + C02686	KEGG	2.4.1.47	2.4.1.47
R01501	Glycosyl-N-acylsphingosine glycohydrolase	Glycosyl-N-acylsphingosine glycohydrolase	Glycosyl-N-acylsphingosine + H2O <=> Sugar + N-Acylsphingosine	C03701 + C00001 <=> C11477 + C00195	KEGG	3.2.1.62	3.2.1.62
R01503	CDP-ethanolamine:N-acylsphingosine ethanolaminephosphotransferase	CDP-ethanolamine:N-acylsphingosine ethanolaminephosphotransferase	CDP-ethanolamine + N-Acylsphingosine <=> CMP + Ceramide phosphoethanolamine	C00570 + C00195 <=> C00055 + C06062	KEGG	2.7.8.-	2.7.8.-
R01504	ATP:2,3-dihydroxybenzoate adenylyltransferase	ATP:2,3-dihydroxybenzoate adenylyltransferase	ATP + 2,3-Dihydroxybenzoate <=> Diphosphate + (2,3-Dihydroxybenzoyl)adenylate	C00002 + C00196 <=> C00013 + C04030	KEGG	2.7.7.58	2.7.7.58
R01505	2,3-dihydro-2,3-dihydroxybenzoate:NAD+ oxidoreductase	2,3-dihydro-2,3-dihydroxybenzoate:NAD+ oxidoreductase	(2S,3S)-2,3-Dihydro-2,3-dihydroxybenzoate + NAD+ <=> 2,3-Dihydroxybenzoate + NADH + H+	C04171 + C00003 <=> C00196 + C00004 + C00080	KEGG	1.3.1.28	1.3.1.28
R01506	2,3-Dihydroxybenzoate:oxygen 2,3-oxidoreductase (decyclizing)	2,3-Dihydroxybenzoate:oxygen 2,3-oxidoreductase (decyclizing)	2,3-Dihydroxybenzoate + Oxygen <=> 2-Carboxy-cis,cis-muconate	C00196 + C00007 <=> C03666	KEGG	1.13.11.28	1.13.11.28
R01507	2,3-Dihydroxybenzoate:oxygen 3,4-oxidoreductase (decyclizing)	2,3-Dihydroxybenzoate:oxygen 3,4-oxidoreductase (decyclizing)	2,3-Dihydroxybenzoate + Oxygen <=> 3-Carboxy-2-hydroxymuconate semialdehyde	C00196 + C00007 <=> C04480	KEGG	1.13.11.14	1.13.11.14
R01508	3-Hydroxybenzoate, hydrogen-donor:oxygen oxidoreduxtase (2-hydroxylating)	3-Hydroxybenzoate, hydrogen-donor:oxygen oxidoreduxtase (2-hydroxylating)	3-Hydroxybenzoate + Reduced acceptor + Oxygen <=> 2,3-Dihydroxybenzoate + Acceptor + H2O	C00587 + C00030 + C00007 <=> C00196 + C00028 + C00001	KEGG	1.14.99.23	1.14.99.23
R01511	D-Glycerate-3-phosphate phosphohydrolase	D-Glycerate-3-phosphate phosphohydrolase	3-Phospho-D-glycerate + H2O <=> D-Glycerate + Orthophosphate	C00197 + C00001 <=> C00258 + C00009	KEGG	3.1.3.38	3.1.3.38
R01512	ATP:3-phospho-D-glycerate 1-phosphotransferase	ATP:3-phospho-D-glycerate 1-phosphotransferase	ATP + 3-Phospho-D-glycerate <=> ADP + 3-Phospho-D-glyceroyl phosphate	C00002 + C00197 <=> C00008 + C00236	KEGG	2.7.2.3	2.7.2.3
R01513	3-Phospho-D-glycerate:NAD+ 2-oxidoreductase	3-Phospho-D-glycerate:NAD+ 2-oxidoreductase	3-Phospho-D-glycerate + NAD+ <=> 3-Phosphonooxypyruvate + NADH + H+	C00197 + C00003 <=> C03232 + C00004 + C00080	KEGG	1.1.1.95	1.1.1.95
R01514	ATP:(R)-glycerate 3-phosphotransferase	ATP:(R)-glycerate 3-phosphotransferase	ATP + D-Glycerate <=> ADP + 3-Phospho-D-glycerate	C00002 + C00258 <=> C00008 + C00197	KEGG	2.7.1.31	2.7.1.31
R01515	3-Phospho-D-glyceroyl phosphate phosphohydrolase	3-Phospho-D-glyceroyl phosphate phosphohydrolase	3-Phospho-D-glyceroyl phosphate + H2O <=> 3-Phospho-D-glycerate + Orthophosphate	C00236 + C00001 <=> C00197 + C00009	KEGG	3.6.1.7	3.6.1.7
R01516	2,3-bisphospho-D-glycerate 2-phosphohydrolase	2,3-bisphospho-D-glycerate 2-phosphohydrolase	2,3-Bisphospho-D-glycerate + H2O <=> 3-Phospho-D-glycerate + Orthophosphate	C01159 + C00001 <=> C00197 + C00009	KEGG	3.1.3.13	3.1.3.13
R01517	GTP:3-phospho-D-glycerate 1-phosphotransferase	GTP:3-phospho-D-glycerate 1-phosphotransferase	GTP + 3-Phospho-D-glycerate <=> GDP + 3-Phospho-D-glyceroyl phosphate	C00044 + C00197 <=> C00035 + C00236	KEGG	2.7.2.10	2.7.2.10
R01518	2-Phospho-D-glycerate 2,3-phosphomutase	2-Phospho-D-glycerate 2,3-phosphomutase	2-Phospho-D-glycerate <=> 3-Phospho-D-glycerate	C00631 <=> C00197	KEGG	5.4.2.1	5.4.2.1
R01519	D-Glucono-1,5-lactone lactonohydrolase	D-Glucono-1,5-lactone lactonohydrolase	D-Glucono-1,5-lactone + H2O <=> D-Gluconic acid	C00198 + C00001 <=> C00257	KEGG	3.1.1.17	3.1.1.17
R01520	beta-D-Glucose:NAD+ 1-oxoreductase	beta-D-Glucose:NAD+ 1-oxoreductase	beta-D-Glucose + NAD+ <=> D-Glucono-1,5-lactone + NADH + H+	C00221 + C00003 <=> C00198 + C00004 + C00080	KEGG	1.1.1.47	1.1.1.47
R01521	beta-D-Glucose:NADP+ 1-oxoreductase	beta-D-Glucose:NADP+ 1-oxoreductase	beta-D-Glucose + NADP+ <=> D-Glucono-1,5-lactone + NADPH + H+	C00221 + C00006 <=> C00198 + C00005 + C00080	KEGG	1.1.1.47	1.1.1.47
R01522	beta-D-Glucose:oxygen 1-oxidoreductase	beta-D-Glucose:oxygen 1-oxidoreductase	beta-D-Glucose + Oxygen <=> D-Glucono-1,5-lactone + Hydrogen peroxide	C00221 + C00007 <=> C00198 + C00027	KEGG	1.1.3.4，1.1.3.5	1.1.3.4
R01523	ATP:D-ribulose-5-phosphate 1-phosphotransferase	ATP:D-ribulose-5-phosphate 1-phosphotransferase	ATP + D-Ribulose 5-phosphate <=> ADP + D-Ribulose 1,5-bisphosphate	C00002 + C00199 <=> C00008 + C01182	KEGG	2.7.1.19	2.7.1.19
R01524	D-Ribitol-5-phosphate:NAD+ 2-oxidoreductase	D-Ribitol-5-phosphate:NAD+ 2-oxidoreductase	D-Ribitol 5-phosphate + NAD+ <=> D-Ribulose 5-phosphate + NADH + H+	C01068 + C00003 <=> C00199 + C00004 + C00080	KEGG	1.1.1.137	1.1.1.137
R01525	D-Ribitol-5-phosphate:NADP+ 2-oxidoreductase	D-Ribitol-5-phosphate:NADP+ 2-oxidoreductase	D-Ribitol 5-phosphate + NADP+ <=> D-Ribulose 5-phosphate + NADPH + H+	C01068 + C00006 <=> C00199 + C00005 + C00080	KEGG	1.1.1.137	1.1.1.137
R01526	ATP:D-ribulose 5-phosphotransferase	ATP:D-ribulose 5-phosphotransferase	ATP + D-Ribulose <=> ADP + D-Ribulose 5-phosphate	C00002 + C00309 <=> C00008 + C00199	KEGG	2.7.1.16，2.7.1.47	2.7.1.16
R01528	6-phospho-D-gluconate:NADP+ 2-oxidoreductase (decarboxylating)	6-phospho-D-gluconate:NADP+ 2-oxidoreductase (decarboxylating)	6-Phospho-D-gluconate + NADP+ <=> D-Ribulose 5-phosphate + CO2 + NADPH + H+	C00345 + C00006 <=> C00199 + C00011 + C00005 + C00080	KEGG	1.1.1.44	1.1.1.44
R01529	D-Ribulose-5-phosphate 3-epimerase	D-Ribulose-5-phosphate 3-epimerase	D-Ribulose 5-phosphate <=> D-Xylulose 5-phosphate	C00199 <=> C00231	KEGG	5.1.3.1	5.1.3.1
R01530	D-arabinose-5-phosphate aldose-ketose-isomerase	D-arabinose-5-phosphate aldose-ketose-isomerase	D-Arabinose 5-phosphate <=> D-Ribulose 5-phosphate	C01112 <=> C00199	KEGG	5.3.1.13	5.3.1.13
R01532	nucleoside-triphosphate diphosphohydrolase	nucleoside-triphosphate diphosphohydrolase	Nucleoside triphosphate + H2O <=> Nucleotide + Diphosphate	C00201 + C00001 <=> C00215 + C00013	KEGG	3.6.1.19	3.6.1.19
R01533	Diisopropyl-fluorophosphate fluorohydrolase	Diisopropyl-fluorophosphate fluorohydrolase	Isoflurophate + H2O <=> Diisopropyl phosphate + Hydrofluoric acid	C00202 + C00001 <=> C03113 + C16487	KEGG	3.1.8.2	3.1.8.2
R01535	UDP-galactose:undecaprenyl-phosphate galactose phosphotransferase	UDP-galactose:undecaprenyl-phosphate galactose phosphotransferase	UDP-D-galactose + di-trans,poly-cis-Undecaprenyl phosphate <=> UMP + alpha-D-Galactosyl-diphosphoundecaprenol	C00052 + C17556 <=> C00105 + C04507	KEGG	2.7.8.6	2.7.8.6
R01537	NO NAME	NO NAME	UDP-N-acetyl-D-galactosamine <=> Glycolipid	C00203 <=> C05005	KEGG
R01538	D-gluconate hydro-lyase (2-dehydro-3-deoxy-D-gluconate-forming)	D-gluconate hydro-lyase (2-dehydro-3-deoxy-D-gluconate-forming)	D-Gluconic acid <=> 2-Dehydro-3-deoxy-D-gluconate + H2O	C00257 <=> C00204 + C00001	KEGG	4.2.1.39	4.2.1.39
R01540	D-altronate hydro-lyase (2-dehydro-3-deoxy-D-gluconate-forming)	D-altronate hydro-lyase (2-dehydro-3-deoxy-D-gluconate-forming)	D-Altronate <=> 2-Dehydro-3-deoxy-D-gluconate + H2O	C00817 <=> C00204 + C00001	KEGG	4.2.1.7	4.2.1.7
R01541	ATP:2-dehydro-3-deoxy-D-gluconate 6-phosphotransferase	ATP:2-dehydro-3-deoxy-D-gluconate 6-phosphotransferase	ATP + 2-Dehydro-3-deoxy-D-gluconate <=> ADP + 2-Dehydro-3-deoxy-6-phospho-D-gluconate	C00002 + C00204 <=> C00008 + C04442	KEGG	2.7.1.45	2.7.1.45
R01542	2-Dehydro-3-deoxy-D-gluconate:NAD+ 5-oxidoreductase	2-Dehydro-3-deoxy-D-gluconate:NAD+ 5-oxidoreductase	2-Dehydro-3-deoxy-D-gluconate + NAD+ <=> (4S)-4,6-Dihydroxy-2,5-dioxohexanoate + NADH + H+	C00204 + C00003 <=> C04349 + C00004 + C00080	KEGG	1.1.1.125，1.1.1.127	1.1.1.125
R01543	2-Dehydro-3-deoxy-D-gluconate:NADP+ 6-oxidoreductase	2-Dehydro-3-deoxy-D-gluconate:NADP+ 6-oxidoreductase	2-Dehydro-3-deoxy-D-gluconate + NADP+ <=> (4S,5S)-4,5-Dihydroxy-2,6-dioxohexanoate + NADPH + H+	C00204 + C00006 <=> C04471 + C00005 + C00080	KEGG	1.1.1.126	1.1.1.126
R01544	2-amino-2-deoxy-D-gluconate ammonia-lyase; D-glucosaminate ammonia-lyase (isomerizing;2-dehydro-3-deoxy-D-gluconate-forming)	2-amino-2-deoxy-D-gluconate ammonia-lyase	2-Amino-2-deoxy-D-gluconate <=> 2-Dehydro-3-deoxy-D-gluconate + NH3	C03752 <=> C00204 + C00014	KEGG	4.3.1.9	4.3.1.9
R01547	ATP:dAMP phosphotransferase	ATP:dAMP phosphotransferase	ATP + dAMP <=> ADP + dADP	C00002 + C00360 <=> C00008 + C00206	KEGG	2.7.4.3，2.7.4.11	2.7.4.3
R01548	dATP:cytidine 5'-phosphotransferase	dATP:cytidine 5'-phosphotransferase	dATP + Cytidine <=> dADP + CMP	C00131 + C00475 <=> C00206 + C00055	KEGG	2.7.1.48	2.7.1.48
R01549	dATP:uridine 5'-phosphotransferase	dATP:uridine 5'-phosphotransferase	dATP + Uridine <=> dADP + UMP	C00131 + C00299 <=> C00206 + C00105	KEGG	2.7.1.48	2.7.1.48
R01550	Propan-2-ol:NADP+ oxidoreductase	Propan-2-ol:NADP+ oxidoreductase	Acetone + NADPH + H+ <=> Propan-2-ol + NADP+	C00207 + C00005 + C00080 <=> C01845 + C00006	KEGG	1.1.1.80	1.1.1.80
R01553	Acetone-cyanohydrin acetone-lyase (cyanide-forming)	Acetone-cyanohydrin acetone-lyase (cyanide-forming)	Acetone cyanohydrin <=> Cyanide + Acetone	C02659 <=> C00177 + C00207	KEGG	4.1.2.46	4.1.2.46
R01555	Maltose:phosphate 1-beta-D-glucosyltransferase	Maltose:phosphate 1-beta-D-glucosyltransferase	Maltose + Orthophosphate <=> D-Glucose + beta-D-Glucose 1-phosphate	C00208 + C00009 <=> C00031 + C00663	KEGG	2.4.1.8	2.4.1.8
R01556	Acetyl-CoA:maltose O-acetyltransferase	Acetyl-CoA:maltose O-acetyltransferase	Acetyl-CoA + Maltose <=> CoA + Acetyl-maltose	C00024 + C00208 <=> C00010 + C02130	KEGG	2.3.1.79	2.3.1.79
R01557	Maltose alpha-D-glucosylmutase	Maltose alpha-D-glucosylmutase	Maltose <=> alpha,alpha-Trehalose	C00208 <=> C01083	KEGG	5.4.99.16	5.4.99.16
R01558	Oxalate:CoA ligase (AMP-forming)	Oxalate:CoA ligase (AMP-forming)	ATP + Oxalate + CoA <=> AMP + Diphosphate + Oxalyl-CoA	C00002 + C00209 + C00010 <=> C00020 + C00013 + C00313	KEGG	6.2.1.8	6.2.1.8
R01559	Succinyl-CoA:oxalate CoA-transferase	Succinyl-CoA:oxalate CoA-transferase	Succinyl-CoA + Oxalate <=> Succinate + Oxalyl-CoA	C00091 + C00209 <=> C00042 + C00313	KEGG	2.8.3.2	2.8.3.2
R01560	Adenosine aminohydrolase	Adenosine aminohydrolase	Adenosine + H2O <=> Inosine + NH3	C00212 + C00001 <=> C00294 + C00014	KEGG	3.5.4.4	3.5.4.4
R01561	Adenosine:phosphate alpha-D-ribosyltransferase	Adenosine:phosphate alpha-D-ribosyltransferase	Adenosine + Orthophosphate <=> Adenine + alpha-D-Ribose 1-phosphate	C00212 + C00009 <=> C00147 + C00620	KEGG	2.4.2.1	2.4.2.1
R01562	adenosine 3'-phosphate phosphohydrolase	adenosine 3'-phosphate phosphohydrolase	3'-AMP + H2O <=> Adenosine + Orthophosphate	C01367 + C00001 <=> C00212 + C00009	KEGG	3.1.3.6	3.1.3.6
R01563	N-Carbamoylsarcosine amidohydrolase	N-Carbamoylsarcosine amidohydrolase	N-Carbamoylsarcosine + H2O <=> Sarcosine + CO2 + NH3	C01043 + C00001 <=> C00213 + C00011 + C00014	KEGG	3.5.1.59	3.5.1.59
R01564	N,N-Dimethylglycine:oxygen oxidoreductase (demethylating)	N,N-Dimethylglycine:oxygen oxidoreductase (demethylating)	N,N-Dimethylglycine + H2O + Oxygen <=> Sarcosine + Formaldehyde + Hydrogen peroxide	C01026 + C00001 + C00007 <=> C00213 + C00067 + C00027	KEGG	1.5.3.10	1.5.3.10
R01565	N,N-Dimethylglycine:acceptor oxidoreductase (demethylating)	N,N-Dimethylglycine:acceptor oxidoreductase (demethylating)	N,N-Dimethylglycine + Acceptor + H2O <=> Sarcosine + Formaldehyde + Reduced acceptor	C01026 + C00028 + C00001 <=> C00213 + C00067 + C00030	KEGG	1.5.99.2	1.5.99.2
R01566	Creatine amidinohydrolase	Creatine amidinohydrolase	Creatine + H2O <=> Sarcosine + Urea	C00300 + C00001 <=> C00213 + C00086	KEGG	3.5.3.3	3.5.3.3
R01567	ATP:thymidine 5'-phosphotransferase	ATP:thymidine 5'-phosphotransferase	ATP + Thymidine <=> ADP + dTMP	C00002 + C00214 <=> C00008 + C00364	KEGG	2.7.1.21	2.7.1.21
R01568	ADP:thymidine 5'-phosphotransferase	ADP:thymidine 5'-phosphotransferase	ADP + Thymidine <=> AMP + dTMP	C00008 + C00214 <=> C00020 + C00364	KEGG	2.7.1.118	2.7.1.118
R01569	Thymidylate 5'-phosphohydrolase	Thymidylate 5'-phosphohydrolase	dTMP + H2O <=> Thymidine + Orthophosphate	C00364 + C00001 <=> C00214 + C00009	KEGG	3.1.3.5，3.1.3.35	3.1.3.5
R01570	thymidine:phosphate deoxy-alpha-D-ribosyltransferase	thymidine:phosphate deoxy-alpha-D-ribosyltransferase	Thymidine + Orthophosphate <=> Thymine + 2-Deoxy-D-ribose 1-phosphate	C00214 + C00009 <=> C00178 + C00672	KEGG	2.4.2.4	2.4.2.4
R01571	AMP:thymidine 5'-phosphotransferase	AMP:thymidine 5'-phosphotransferase	AMP + Thymidine <=> Adenosine + dTMP	C00020 + C00214 <=> C00212 + C00364	KEGG	2.7.1.114	2.7.1.114
R01572	Nucleotide phosphohydrolase	Nucleotide phosphohydrolase	Nucleotide + H2O <=> Nucleoside + Orthophosphate	C00215 + C00001 <=> C00801 + C00009	KEGG	3.1.3.31	3.1.3.31
R01573	ATP:D-arabinose 5-phosphotransferase	ATP:D-arabinose 5-phosphotransferase	ATP + D-Arabinose <=> ADP + D-Arabinose 5-phosphate	C00002 + C00216 <=> C00008 + C01112	KEGG	2.7.1.54	2.7.1.54
R01574	D-Arabinose:NAD+ 1-oxidoreductase	D-Arabinose:NAD+ 1-oxidoreductase	D-Arabinose + NAD+ <=> D-Arabinono-1,4-lactone + NADH + H+	C00216 + C00003 <=> C00652 + C00004 + C00080	KEGG	1.1.1.116，1.1.1.117	1.1.1.116
R01575	D-Arabinose:NADP+ 1-oxidoreductase	D-Arabinose:NADP+ 1-oxidoreductase	D-Arabinose + NADP+ <=> D-Arabinono-1,4-lactone + NADPH + H+	C00216 + C00006 <=> C00652 + C00005 + C00080	KEGG	1.1.1.117	1.1.1.117
R01576	3-deoxy-D-manno-octulosonate D-arabinose-lyase (pyruvate-forming)	3-deoxy-D-manno-octulosonate D-arabinose-lyase (pyruvate-forming)	3-Deoxy-D-manno-octulosonate <=> Pyruvate + D-Arabinose	C01187 <=> C00022 + C00216	KEGG	4.1.2.23	4.1.2.23
R01577	D-arabinose aldose-ketose-isomerase	D-arabinose aldose-ketose-isomerase	D-Arabinose <=> D-Ribulose	C00216 <=> C00309	KEGG	5.3.1.3	5.3.1.3
R01578	NO NAME	NO NAME	D-Glutamate + Peptide <=> D-Glutamyl-peptide	C00217 + C00012 <=> C02671	KEGG
R01579	D-Glutamine amidohydrolase	D-Glutamine amidohydrolase	D-Glutamine + H2O <=> D-Glutamate + NH3	C00819 + C00001 <=> C00217 + C00014	KEGG	3.5.1.2，3.5.1.35，3.5.1.38	3.5.1.2
R01580	Pyridoxamine-5'-phosphate:2-oxoglutarate aminotransferase (D-glutamate-forming)	Pyridoxamine-5'-phosphate:2-oxoglutarate aminotransferase (D-glutamate-forming)	Pyridoxamine phosphate + 2-Oxoglutarate <=> Pyridoxal phosphate + D-Glutamate	C00647 + C00026 <=> C00018 + C00217	KEGG	2.6.1.54	2.6.1.54
R01581	N-Acyl-D-glutamate amidohydrolase	N-Acyl-D-glutamate amidohydrolase	N-Acyl-D-glutamate + H2O <=> Carboxylate + D-Glutamate	C06379 + C00001 <=> C00060 + C00217	KEGG	3.5.1.82	3.5.1.82
R01582	D-Phenylalanine:2-oxoglutarate aminotransferase	D-Phenylalanine:2-oxoglutarate aminotransferase	D-Phenylalanine + 2-Oxoglutarate <=> Phenylpyruvate + D-Glutamate	C02265 + C00026 <=> C00166 + C00217	KEGG	2.6.1.21	2.6.1.21
R01583	D-glutamate hydro-lyase (cyclizing; 5-oxo-D-proline-forming)	D-glutamate hydro-lyase (cyclizing; 5-oxo-D-proline-forming)	D-Glutamate <=> 5-Oxo-D-proline + H2O	C00217 <=> C02237 + C00001	KEGG	4.2.1.48	4.2.1.48
R01584	N-methyl-L-alanine:NADP+ oxidoreductase (demethylating, deaminating)	N-methyl-L-alanine:NADP+ oxidoreductase (demethylating, deaminating)	N-Methyl-L-alanine + H2O + NADP+ <=> Pyruvate + Methylamine + NADPH + H+	C02721 + C00001 + C00006 <=> C00022 + C00218 + C00005 + C00080	KEGG	1.4.1.17	1.4.1.17
R01585	L-Glutamate:methylamine ligase (ADP-forming)	L-Glutamate:methylamine ligase (ADP-forming)	ATP + L-Glutamate + Methylamine <=> ADP + Orthophosphate + N5-Methyl-L-glutamine	C00002 + C00025 + C00218 <=> C00008 + C00009 + C03153	KEGG	6.3.4.12	6.3.4.12
R01586	Methylamine:L-glutamate N-methyltransferase	Methylamine:L-glutamate N-methyltransferase	Methylamine + L-Glutamate <=> NH3 + N-Methyl-L-glutamate	C00218 + C00025 <=> C00014 + C01046	KEGG	2.1.1.21	2.1.1.21
R01587	N-Methyl-2-oxoglutaramate methylamidohydrolase	N-Methyl-2-oxoglutaramate methylamidohydrolase	N-Methyl-2-oxoglutaramate + H2O <=> Methylamine + 2-Oxoglutarate	C03623 + C00001 <=> C00218 + C00026	KEGG	3.5.1.36	3.5.1.36
R01588	dimethylamine:electron-transferring flavoprotein oxidoreductase	dimethylamine:electron-transferring flavoprotein oxidoreductase	Dimethylamine + H2O + Electron-transferring flavoprotein <=> Methylamine + Formaldehyde + Reduced electron-transferring flavoprotein	C00543 + C00001 + C04253 <=> C00218 + C00067 + C04570	KEGG	1.5.8.1	1.5.8.1
R01589	Methylguanidine amidinohydrolase	Methylguanidine amidinohydrolase	Methylguanidine + H2O <=> Methylamine + Urea	C02294 + C00001 <=> C00218 + C00086	KEGG	3.5.3.16	3.5.3.16
R01590	Arachidonate:oxygen oxidoreductase	Arachidonate:oxygen oxidoreductase	(5Z,8Z,11Z,14Z)-Icosatetraenoic acid + 2 Oxygen <=> Prostaglandin G2	C00219 + 2 C00007 <=> C05956	KEGG	1.14.99.1	1.14.99.1
R01593	Arachidonate:oxygen 15-oxidoreductase	Arachidonate:oxygen 15-oxidoreductase	(5Z,8Z,11Z,14Z)-Icosatetraenoic acid + Oxygen <=> 15(S)-HPETE	C00219 + C00007 <=> C05966	KEGG	1.13.11.33	1.13.11.33
R01594	Arachidonate:oxygen 8-oxidoreductase	Arachidonate:oxygen 8-oxidoreductase	(5Z,8Z,11Z,14Z)-Icosatetraenoic acid + Oxygen <=> 8(R)-HPETE	C00219 + C00007 <=> C04822	KEGG	1.13.11.40	1.13.11.40
R01595	Arachidonate:oxygen 5-oxidoreductase	Arachidonate:oxygen 5-oxidoreductase	(5Z,8Z,11Z,14Z)-Icosatetraenoic acid + Oxygen <=> 5(S)-HPETE	C00219 + C00007 <=> C05356	KEGG	1.13.11.34	1.13.11.34
R01596	arachidonate:oxygen 12-oxidoreductase	arachidonate:oxygen 12-oxidoreductase	(5Z,8Z,11Z,14Z)-Icosatetraenoic acid + Oxygen <=> 12(S)-HPETE	C00219 + C00007 <=> C05965	KEGG	1.13.11.31	1.13.11.31
R01598	Arachidonate:CoA ligase (AMP-forming)	Arachidonate:CoA ligase (AMP-forming)	ATP + (5Z,8Z,11Z,14Z)-Icosatetraenoic acid + CoA <=> AMP + Diphosphate + Arachidonyl-CoA	C00002 + C00219 + C00010 <=> C00020 + C00013 + C02249	KEGG	6.2.1.15	6.2.1.15
R01599	Arachidonate,reduced acceptor:oxygen oxidoreductase	Arachidonate,reduced acceptor:oxygen oxidoreductase	(5Z,8Z,11Z,14Z)-Icosatetraenoic acid + Reduced acceptor + 2 Oxygen <=> Prostaglandin H2 + Acceptor + H2O	C00219 + C00030 + 2 C00007 <=> C00427 + C00028 + C00001	KEGG	1.14.99.1	1.14.99.1
R01600	ATP:beta-D-glucose 6-phosphotransferase	ATP:beta-D-glucose 6-phosphotransferase	ATP + beta-D-Glucose <=> ADP + beta-D-Glucose 6-phosphate	C00002 + C00221 <=> C00008 + C01172	KEGG	2.7.1.1，2.7.1.2	2.7.1.1
R01602	D-Glucose 1-epimerase	D-Glucose 1-epimerase	alpha-D-Glucose <=> beta-D-Glucose	C00267 <=> C00221	KEGG	5.1.3.3	5.1.3.3
R01604	3-Oxopropanoate:NAD+ oxidoreductase	3-Oxopropanoate:NAD+ oxidoreductase	3-Oxopropanoate + NAD+ + H2O <=> Malonate + NADH + H+	C00222 + C00003 + C00001 <=> C00383 + C00004 + C00080	KEGG	1.2.1.15	1.2.1.15
R01607	3-Oxopropanoate:NADP+ oxidoreductase	3-Oxopropanoate:NADP+ oxidoreductase	3-Oxopropanoate + NADP+ + H2O <=> Malonate + NADPH + H+	C00222 + C00006 + C00001 <=> C00383 + C00005 + C00080	KEGG	1.2.1.15	1.2.1.15
R01608	3-hydroxypropanoate:NAD+ oxidoreductase	3-hydroxypropanoate:NAD+ oxidoreductase	3-Hydroxypropanoate + NAD+ <=> 3-Oxopropanoate + NADH + H+	C01013 + C00003 <=> C00222 + C00004 + C00080	KEGG	1.1.1.59	1.1.1.59
R01609	3-aci-Nitropropanoate:oxygen oxidoreductase	3-aci-Nitropropanoate:oxygen oxidoreductase	3-Oxopropanoate + Nitrite + Hydrogen peroxide <=> 3-aci-Nitropropanoate + Oxygen + H2O	C00222 + C00088 + C00027 <=> C03071 + C00007 + C00001	KEGG	1.7.3.5	1.7.3.5
R01611	3-Oxopropanoate hydro-lyase	3-Oxopropanoate hydro-lyase	3-Oxopropanoate <=> Propynoate + H2O	C00222 <=> C00804 + C00001	KEGG	4.2.1.27	4.2.1.27
R01613	Malonyl-CoA:4-Coumaroyl-CoA malonyltransferase(cyclizing)	Malonyl-CoA:4-Coumaroyl-CoA malonyltransferase(cyclizing)	p-Coumaroyl-CoA + 3 Malonyl-CoA <=> Naringenin chalcone + 4 CoA + 3 CO2	C00223 + 3 C00083 <=> C06561 + 4 C00010 + 3 C00011	KEGG	2.3.1.74	2.3.1.74
R01614	Malonyl-CoA:4-coumaroyl-CoA malonyltransferase (cyclizing)	Malonyl-CoA:4-coumaroyl-CoA malonyltransferase (cyclizing)	3 Malonyl-CoA + p-Coumaroyl-CoA <=> 4 CoA + 3,4',5-Trihydroxystilbene + 4 CO2	3 C00083 + C00223 <=> 4 C00010 + C03582 + 4 C00011	KEGG	2.3.1.95	2.3.1.95
R01615	4-Hydroxycinnamyl aldehyde:NADP+ oxidoreductase (CoA-hydroxycinnamoylating)	4-Hydroxycinnamyl aldehyde:NADP+ oxidoreductase (CoA-hydroxycinnamoylating)	4-Hydroxycinnamyl aldehyde + CoA + NADP+ <=> p-Coumaroyl-CoA + NADPH + H+	C05608 + C00010 + C00006 <=> C00223 + C00005 + C00080	KEGG	1.2.1.44	1.2.1.44
R01616	4-Coumarate:CoA ligase (AMP-forming)	4-Coumarate:CoA ligase (AMP-forming)	ATP + 4-Coumarate + CoA <=> AMP + Diphosphate + p-Coumaroyl-CoA	C00002 + C00811 + C00010 <=> C00020 + C00013 + C00223	KEGG	6.2.1.12	6.2.1.12
R01617	4-Coumaroyl-CoA:agmatine N4-coumaroyltransferase	4-Coumaroyl-CoA:agmatine N4-coumaroyltransferase	p-Coumaroyl-CoA + Agmatine <=> p-Coumaroylagmatine + CoA	C00223 + C00179 <=> C04498 + C00010	KEGG	2.3.1.64	2.3.1.64
R01618	APS:ATP adenylyltransferase	APS:ATP adenylyltransferase	Adenylyl sulfate + ATP <=> Sulfate + P1,P4-Bis(5'-adenosyl) tetraphosphate	C00224 + C00002 <=> C00059 + C01260	KEGG	2.7.7.53	2.7.7.53
R01619	Adenylyl-sulfate:ammonia adenylyltransferase	Adenylyl-sulfate:ammonia adenylyltransferase	Adenylyl sulfate + NH3 <=> Adenosine 5'-phosphoramidate + Sulfate	C00224 + C00014 <=> C03851 + C00059	KEGG	2.7.7.51	2.7.7.51
R01620	Acetyl-phosphate:L-lysine N6-acetyltransferase	Acetyl-phosphate:L-lysine N6-acetyltransferase	Acetyl phosphate + L-Lysine <=> Orthophosphate + N6-Acetyl-L-lysine	C00227 + C00047 <=> C00009 + C02727	KEGG	2.3.1.32	2.3.1.32
R01621	D-Xylulose 5-phosphate D-glyceraldehyde-3-phosphate-lyase (adding phosphate; acetyl-phosphate-forming)	D-Xylulose 5-phosphate D-glyceraldehyde-3-phosphate-lyase (adding phosphate; acetyl-phosphate-forming)	D-Xylulose 5-phosphate + Orthophosphate <=> Acetyl phosphate + D-Glyceraldehyde 3-phosphate + H2O	C00231 + C00009 <=> C00227 + C00118 + C00001	KEGG	4.1.2.9，4.1.2.22	4.1.2.9
R01623	[Acyl-carrier-protein] 4'-pantetheine-phosphohydrolase	[Acyl-carrier-protein] 4'-pantetheine-phosphohydrolase	Acyl-carrier protein + H2O <=> Pantetheine 4'-phosphate + Apo-[acyl-carrier-protein]	C00229 + C00001 <=> C01134 + C03688	KEGG	3.1.4.14	3.1.4.14
R01624	acetyl-CoA:[acyl-carrier-protein] S-acetyltransferase	acetyl-CoA:[acyl-carrier-protein] S-acetyltransferase	Acetyl-CoA + Acyl-carrier protein <=> CoA + Acetyl-[acyl-carrier protein]	C00024 + C00229 <=> C00010 + C03939	KEGG	2.3.1.38，2.3.1.85，2.3.1.86，2.3.1.180	2.3.1.38
R01625	CoA:apo-[acyl-carrier-protein] pantetheinephosphotransferase	CoA:apo-[acyl-carrier-protein] pantetheinephosphotransferase	CoA + Apo-[acyl-carrier-protein] <=> Adenosine 3',5'-bisphosphate + Acyl-carrier protein	C00010 + C03688 <=> C00054 + C00229	KEGG	2.7.8.7，2.7.8.-	2.7.8.7
R01626	Malonyl-CoA:[acyl-carrier-protein] S-malonyltransferase	Malonyl-CoA:[acyl-carrier-protein] S-malonyltransferase	Malonyl-CoA + Acyl-carrier protein <=> CoA + Malonyl-[acyl-carrier protein]	C00083 + C00229 <=> C00010 + C01209	KEGG	2.3.1.39，2.3.1.85，2.3.1.86	2.3.1.39
R01627	3-Dehydroshikimate hydro-lyase	3-Dehydroshikimate hydro-lyase	3-Dehydroshikimate <=> 3,4-Dihydroxybenzoate + H2O	C02637 <=> C00230 + C00001	KEGG	4.2.1.-	4.2.1.-
R01628	3-hydroxybenzoate,NADPH:oxygen oxidoreductase (4-hydroxylating)	3-hydroxybenzoate,NADPH:oxygen oxidoreductase (4-hydroxylating)	3-Hydroxybenzoate + Oxygen + NADPH + H+ <=> 3,4-Dihydroxybenzoate + NADP+ + H2O	C00587 + C00007 + C00005 + C00080 <=> C00230 + C00006 + C00001	KEGG	1.14.13.23	1.14.13.23
R01629	protocatechuate,NADH:oxygen oxidoreductase (1-hydroxylating, decarboxylating)	protocatechuate,NADH:oxygen oxidoreductase (1-hydroxylating, decarboxylating)	3,4-Dihydroxybenzoate + Oxygen + NADH + H+ <=> Benzene-1,2,4-triol + CO2 + NAD+ + H2O	C00230 + C00007 + C00004 + C00080 <=> C02814 + C00011 + C00003 + C00001	KEGG	1.13.11.-，1.14.13.64	1.14.13.64
R01630	protocatechuate,NADPH:oxygen oxidoreductase (1-hydroxylating, decarboxylating)	protocatechuate,NADPH:oxygen oxidoreductase (1-hydroxylating, decarboxylating)	3,4-Dihydroxybenzoate + Oxygen + NADPH + H+ <=> Benzene-1,2,4-triol + CO2 + NADP+ + H2O	C00230 + C00007 + C00005 + C00080 <=> C02814 + C00011 + C00006 + C00001	KEGG	1.13.11.-，1.14.13.64	1.14.13.64
R01631	Protocatechuate:oxygen 3,4-oxidoreductase (decyclizing)	Protocatechuate:oxygen 3,4-oxidoreductase (decyclizing)	3,4-Dihydroxybenzoate + Oxygen <=> 3-Carboxy-cis,cis-muconate	C00230 + C00007 <=> C01163	KEGG	1.13.11.3	1.13.11.3
R01632	Protocatechuate:oxygen 4,5-oxidoreductase (decyclizing)	Protocatechuate:oxygen 4,5-oxidoreductase (decyclizing)	3,4-Dihydroxybenzoate + Oxygen <=> 4-Carboxy-2-hydroxymuconate semialdehyde	C00230 + C00007 <=> C04484	KEGG	1.13.11.8	1.13.11.8
R01633	(3S,4R)-3,4-dihydroxycyclohexa-1,5-diene-1,4-dicarboxylate:NAD+ oxidoreductase	(3S,4R)-3,4-dihydroxycyclohexa-1,5-diene-1,4-dicarboxylate:NAD+ oxidoreductase	(3S,4R)-3,4-Dihydroxycyclohexa-1,5-diene-1,4-dicarboxylate + NAD+ <=> 3,4-Dihydroxybenzoate + CO2 + NADH + H+	C06318 + C00003 <=> C00230 + C00011 + C00004 + C00080	KEGG	1.3.1.53	1.3.1.53
R01634	3,4-Dihydroxyphthalate carboxy-lyase (3,4-dihydroxybenzoate-forming)	3,4-Dihydroxyphthalate carboxy-lyase (3,4-dihydroxybenzoate-forming)	3,4-Dihydroxyphthalate <=> 3,4-Dihydroxybenzoate + CO2	C03223 <=> C00230 + C00011	KEGG	4.1.1.69	4.1.1.69
R01635	4,5-Dihydroxyphthalate carboxy-lyase (3,4-dihydroxybenzoate-forming)	4,5-Dihydroxyphthalate carboxy-lyase (3,4-dihydroxybenzoate-forming)	4,5-Dihydroxyphthalate <=> 3,4-Dihydroxybenzoate + CO2	C03233 <=> C00230 + C00011	KEGG	4.1.1.55	4.1.1.55
R01636	4-sulfobenzoate,NADH:oxygen oxidoreductase (3,4-hydroxylating, sulfite-forming)	4-sulfobenzoate,NADH:oxygen oxidoreductase (3,4-hydroxylating, sulfite-forming)	4-Sulfobenzoate + Oxygen + NADH + H+ <=> 3,4-Dihydroxybenzoate + Sulfite + NAD+	C02236 + C00007 + C00004 + C00080 <=> C00230 + C00094 + C00003	KEGG	1.14.12.8	1.14.12.8
R01637	NO NAME	NO NAME	3,4-Dihydroxybenzoate <=> Gallate	C00230 <=> C01424	KEGG
R01639	ATP:D-xylulose 5-phosphotransferase	ATP:D-xylulose 5-phosphotransferase	ATP + D-Xylulose <=> ADP + D-Xylulose 5-phosphate	C00002 + C00310 <=> C00008 + C00231	KEGG	2.7.1.17	2.7.1.17
R01641	Sedoheptulose-7-phosphate:D-glyceraldehyde-3-phosphate glycolaldehyde transferase	Sedoheptulose-7-phosphate:D-glyceraldehyde-3-phosphate glycolaldehyde transferase	Sedoheptulose 7-phosphate + D-Glyceraldehyde 3-phosphate <=> D-Ribose 5-phosphate + D-Xylulose 5-phosphate	C05382 + C00118 <=> C00117 + C00231	KEGG	2.2.1.1	2.2.1.1
R01644	4-Hydroxybutanoate:NAD+ oxidoreductase	4-Hydroxybutanoate:NAD+ oxidoreductase	4-Hydroxybutanoic acid + NAD+ <=> Succinate semialdehyde + NADH + H+	C00989 + C00003 <=> C00232 + C00004 + C00080	KEGG	1.1.1.61	1.1.1.61
R01645	4-hydroxy-2-oxo-heptandioate succinate semialdehyde-lyase (pyruvate-forming)	4-hydroxy-2-oxo-heptandioate succinate semialdehyde-lyase (pyruvate-forming)	4-Hydroxy-2-oxo-heptanedioate <=> Succinate semialdehyde + Pyruvate	C05601 <=> C00232 + C00022	KEGG	4.1.2.-	4.1.2.-
R01647	NO NAME	NO NAME	Succinate semialdehyde + Pyruvate <=> 2,4-Dihydroxyhept-2-enedioate	C00232 + C00022 <=> C06201	KEGG	4.1.2.-	4.1.2.-
R01648	4-aminobutanoate:2-oxoglutarate aminotransferase	4-aminobutanoate:2-oxoglutarate aminotransferase	4-Aminobutanoate + 2-Oxoglutarate <=> Succinate semialdehyde + L-Glutamate	C00334 + C00026 <=> C00232 + C00025	KEGG	2.6.1.19	2.6.1.19
R01649	2-(Acetamidomethylene)succinate amidohydrolase (deaminating, decarboxylating)	2-(Acetamidomethylene)succinate amidohydrolase (deaminating, decarboxylating)	2-(Acetamidomethylene)succinate + 2 H2O <=> Acetate + Succinate semialdehyde + NH3 + CO2	C01215 + 2 C00001 <=> C00033 + C00232 + C00014 + C00011	KEGG	3.5.1.29	3.5.1.29
R01650	NO NAME	NO NAME	Succinate semialdehyde + Cyanide + NH3 <=> gamma-Amino-gamma-cyanobutanoate + H2O	C00232 + C00177 + C00014 <=> C05715 + C00001	KEGG
R01651	4-methyl-2-oxopentanoate:NAD+ oxidoreductase (CoA-mehtylpropanoylating)	4-methyl-2-oxopentanoate:NAD+ oxidoreductase (CoA-mehtylpropanoylating)	4-Methyl-2-oxopentanoate + CoA + NAD+ <=> 3-Methylbutanoyl-CoA + CO2 + NADH + H+	C00233 + C00010 + C00003 <=> C02939 + C00011 + C00004 + C00080	KEGG	1.2.1.25	1.2.1.25
R01652	NO NAME	NO NAME	4-Methyl-2-oxopentanoate + CO2 <=> (2S)-2-Isopropyl-3-oxosuccinate	C00233 + C00011 <=> C04236	KEGG
R01654	10-Formyltetrahydrofolate:L-glutamate ligase (ADP-forming)	10-Formyltetrahydrofolate:L-glutamate ligase (ADP-forming)	ATP + 10-Formyltetrahydrofolate + L-Glutamate <=> ADP + Orthophosphate + 10-Formyltetrahydrofolyl L-glutamate	C00002 + C00234 + C00025 <=> C00008 + C00009 + C05928	KEGG	6.3.2.12，6.3.2.17	6.3.2.12
R01655	5,10-Methenyltetrahydrofolate 5-hydrolase (decyclizing)	5,10-Methenyltetrahydrofolate 5-hydrolase (decyclizing)	5,10-Methenyltetrahydrofolate + H2O <=> 10-Formyltetrahydrofolate + H+	C00445 + C00001 <=> C00234 + C00080	KEGG	3.5.4.9	3.5.4.9
R01657	Dimethylallyl-diphosphate:L-tryptophan dimethylallyltransferase	Dimethylallyl-diphosphate:L-tryptophan dimethylallyltransferase	Dimethylallyl diphosphate + L-Tryptophan <=> Diphosphate + 4-(3-Methylbut-2-enyl)-L-tryptophan	C00235 + C00078 <=> C00013 + C04290	KEGG	2.5.1.34	2.5.1.34
R01658	Dimethylallyl-diphosphate:isopentenyl-diphosphate dimethylallyltranstransferase	Dimethylallyl-diphosphate:isopentenyl-diphosphate dimethylallyltranstransferase	Dimethylallyl diphosphate + Isopentenyl diphosphate <=> Diphosphate + Geranyl diphosphate	C00235 + C00129 <=> C00013 + C00341	KEGG	2.5.1.1	2.5.1.1
R01659	Dimethylallyl-diphosphate:isopentenyl-diphosphate dimethylallylcistransferase	Dimethylallyl-diphosphate:isopentenyl-diphosphate dimethylallylcistransferase	Dimethylallyl diphosphate + Isopentenyl diphosphate <=> Diphosphate + Neryl diphosphate	C00235 + C00129 <=> C00013 + C02569	KEGG	2.5.1.28	2.5.1.28
R01660	3-phospho-D-glyceroyl-phosphate:alpha-D-glucose-1-phosphate 6-phosphotransferase	3-phospho-D-glyceroyl-phosphate:alpha-D-glucose-1-phosphate 6-phosphotransferase	3-Phospho-D-glyceroyl phosphate + D-Glucose 1-phosphate <=> 3-Phospho-D-glycerate + alpha-D-Glucose 1,6-bisphosphate	C00236 + C00103 <=> C00197 + C01231	KEGG	2.7.1.106	2.7.1.106
R01662	3-phospho-D-glycerate 1,2-phosphomutase	3-phospho-D-glycerate 1,2-phosphomutase	3-Phospho-D-glyceroyl phosphate <=> 2,3-Bisphospho-D-glycerate	C00236 <=> C01159	KEGG	5.4.2.1，5.4.2.4	5.4.2.1
R01663	dCMP aminohydrolase	dCMP aminohydrolase	dCMP + H2O <=> dUMP + NH3	C00239 + C00001 <=> C00365 + C00014	KEGG	3.5.4.12	3.5.4.12
R01664	2'-Deoxycytidine 5'-monophosphate phosphohydrolase	2'-Deoxycytidine 5'-monophosphate phosphohydrolase	dCMP + H2O <=> Deoxycytidine + Orthophosphate	C00239 + C00001 <=> C00881 + C00009	KEGG	3.1.3.5	3.1.3.5
R01665	ATP:dCMP phosphotransferase	ATP:dCMP phosphotransferase	ATP + dCMP <=> ADP + dCDP	C00002 + C00239 <=> C00008 + C00705	KEGG	2.7.4.14	2.7.4.14
R01666	ATP:deoxycitidine 5'-phosphotransferase	ATP:deoxycitidine 5'-phosphotransferase	ATP + Deoxycytidine <=> ADP + dCMP	C00002 + C00881 <=> C00008 + C00239	KEGG	2.7.1.74	2.7.1.74
R01667	dCDP nucleotidohydrolase	dCDP nucleotidohydrolase	dCDP + H2O <=> dCMP + Orthophosphate	C00705 + C00001 <=> C00239 + C00009	KEGG	3.6.1.12	3.6.1.12
R01668	dCTP nucleotidohydrolase	dCTP nucleotidohydrolase	dCTP + H2O <=> dCMP + Diphosphate	C00458 + C00001 <=> C00239 + C00013	KEGG	3.6.1.12	3.6.1.12
R01669	5,10-Methylenetetrahydrofolate:deoxycytidylate 5-hydroxymethyltransferase	5,10-Methylenetetrahydrofolate:deoxycytidylate 5-hydroxymethyltransferase	5,10-Methylenetetrahydrofolate + H2O + dCMP <=> Tetrahydrofolate + 5-Hydroxymethyldeoxycytidylate	C00143 + C00001 + C00239 <=> C00101 + C03997	KEGG	2.1.2.8	2.1.2.8
R01670	5,10-Methylenetetrahydrofolate:dCMP C-methyltransferase	5,10-Methylenetetrahydrofolate:dCMP C-methyltransferase	5,10-Methylenetetrahydrofolate + dCMP <=> Dihydrofolate + Deoxy-5-methylcytidylate	C00143 + C00239 <=> C00415 + C03495	KEGG	2.1.1.54	2.1.1.54
R01675	S-Adenosyl-L-methionine:rRNA (adenosine-2'-O-)-methyltransferase	S-Adenosyl-L-methionine:rRNA (adenosine-2'-O-)-methyltransferase	S-Adenosyl-L-methionine + rRNA <=> S-Adenosyl-L-homocysteine + rRNA containing a single residue of 2'-O-methyladenosine	C00019 + C00240 <=> C00021 + C04779	KEGG	2.1.1.66	2.1.1.66
R01676	Guanine aminohydrolase	Guanine aminohydrolase	Guanine + H2O <=> Xanthine + NH3	C00242 + C00001 <=> C00385 + C00014	KEGG	3.5.4.3	3.5.4.3
R01677	Guanosine ribohydrolase	Guanosine ribohydrolase	Guanosine + H2O <=> Guanine + D-Ribose	C00387 + C00001 <=> C00242 + C00121	KEGG	3.2.2.1，3.2.2.8	3.2.2.1
R01678	Lactose galactohydrolase	Lactose galactohydrolase	Lactose + H2O <=> alpha-D-Glucose + D-Galactose	C00243 + C00001 <=> C00267 + C00124	KEGG	3.2.1.23，3.2.1.108	3.2.1.23
R01680	Lactose:(acceptor) 3-oxidoreductase	Lactose:(acceptor) 3-oxidoreductase	Lactose + Acceptor <=> 3-Ketolactose + Reduced acceptor	C00243 + C00028 <=> C05403 + C00030	KEGG	1.1.99.13	1.1.99.13
R01681	hypotaurine:NAD+ oxidoreductase	hypotaurine:NAD+ oxidoreductase	Hypotaurine + NAD+ + H2O <=> Taurine + NADH + H+	C00519 + C00003 + C00001 <=> C00245 + C00004 + C00080	KEGG	1.8.1.3	1.8.1.3
R01682	3-Sulfo-L-alanine carboxy-lyase (taurine-forming)	3-Sulfo-L-alanine carboxy-lyase (taurine-forming)	L-Cysteate <=> Taurine + CO2	C00506 <=> C00245 + C00011	KEGG	4.1.1.15，4.1.1.29	4.1.1.15
R01683	tauropine:NAD+ oxidoreductase (taurine-forming)	tauropine:NAD+ oxidoreductase (taurine-forming)	Tauropine + NAD+ + H2O <=> Taurine + Pyruvate + NADH + H+	C01616 + C00003 + C00001 <=> C00245 + C00022 + C00004 + C00080	KEGG	1.5.1.23	1.5.1.23
R01684	Taurine:2-oxoglutarate aminotransferase	Taurine:2-oxoglutarate aminotransferase	Taurine + 2-Oxoglutarate <=> Sulfoacetaldehyde + L-Glutamate	C00245 + C00026 <=> C00593 + C00025	KEGG	2.6.1.55	2.6.1.55
R01685	taurine:ferricytochrome-c oxidoreductase (deaminating)	taurine:ferricytochrome-c oxidoreductase (deaminating)	Taurine + H2O + 2 Ferricytochrome c <=> Sulfoacetaldehyde + NH3 + 2 Ferrocytochrome c + 2 H+	C00245 + C00001 + 2 C00125 <=> C00593 + C00014 + 2 C00126 + 2 C00080	KEGG	1.4.2.-	1.4.2.-
R01686	L-arginine:taurine amidinotransferase	L-arginine:taurine amidinotransferase	Taurine + L-Arginine <=> Taurocyamine + L-Ornithine	C00245 + C00062 <=> C01959 + C00077	KEGG	2.1.4.1	2.1.4.1
R01687	(5-L-glutamyl)-peptide:taurine 5-glutamyltransferase	(5-L-glutamyl)-peptide:taurine 5-glutamyltransferase	(5-L-Glutamyl)-peptide + Taurine <=> Peptide + 5-L-Glutamyl-taurine	C03193 + C00245 <=> C00012 + C05844	KEGG	2.3.2.2	2.3.2.2
R01688	ATP:butanoate 1-phosphotransferase	ATP:butanoate 1-phosphotransferase	ATP + Butanoic acid <=> ADP + Butanoylphosphate	C00002 + C00246 <=> C00008 + C02527	KEGG	2.7.2.7	2.7.2.7
R01689	butanoate:NAD+ delta2-oxidoreductase	butanoate:NAD+ delta2-oxidoreductase	Butanoic acid + NAD+ <=> 2-Butenoate + NADH + H+	C00246 + C00003 <=> C01771 + C00004 + C00080	KEGG	1.3.1.31	1.3.1.31
R01690	5'-butyrylphosphoinosine butyrylhydrolase	5'-butyrylphosphoinosine butyrylhydrolase	5'-Butyrylphosphoinosine + H2O <=> IMP + Butanoic acid	C06435 + C00001 <=> C00130 + C00246	KEGG	3.6.1.20	3.6.1.20
R01694	L-Sorbose:NADP+ 5-oxidoreductase	L-Sorbose:NADP+ 5-oxidoreductase	L-Sorbose + NADP+ <=> 5-Dehydro-D-fructose + NADPH + H+	C00247 + C00006 <=> C00273 + C00005 + C00080	KEGG	1.1.1.123	1.1.1.123
R01695	L-Sorbose:oxygen 5-oxidoreductase	L-Sorbose:oxygen 5-oxidoreductase	L-Sorbose + Oxygen <=> 5-Dehydro-D-fructose + Hydrogen peroxide	C00247 + C00007 <=> C00273 + C00027	KEGG	1.1.3.11	1.1.3.11
R01696	L-Sorbose:acceptor 5-oxidoreductase	L-Sorbose:acceptor 5-oxidoreductase	L-Sorbose + Acceptor <=> 5-Dehydro-D-fructose + Reduced acceptor	C00247 + C00028 <=> C00273 + C00030	KEGG	1.1.99.12	1.1.99.12
R01697	D-Sorbitol:(acceptor) 1-oxidoreductase	D-Sorbitol:(acceptor) 1-oxidoreductase	D-Sorbitol + Acceptor <=> L-Sorbose + Reduced acceptor	C00794 + C00028 <=> C00247 + C00030	KEGG	1.1.99.21	1.1.99.21
R01698	Dihydrolipoamide:NAD+ oxidoreductase	Dihydrolipoamide:NAD+ oxidoreductase	Dihydrolipoamide + NAD+ <=> Lipoamide + NADH + H+	C00579 + C00003 <=> C00248 + C00004 + C00080	KEGG	1.8.1.4	1.8.1.4
R01699	pyruvate:[dihydrolipoyllysine-residue acetyltransferase]-lipoyllysine 2-oxidoreductase (decarboxylating, acceptor-acetylating)	pyruvate:[dihydrolipoyllysine-residue acetyltransferase]-lipoyllysine 2-oxidoreductase (decarboxylating, acceptor-acetylating)	Pyruvate + Enzyme N6-(lipoyl)lysine <=> [Dihydrolipoyllysine-residue acetyltransferase] S-acetyldihydrolipoyllysine + CO2	C00022 + C15972 <=> C16255 + C00011	KEGG	1.2.4.1	1.2.4.1
R01700	2-oxoglutarate:[dihydrolipoyllysine-residue succinyltransferase]-lipoyllysine 2-oxidoreductase (decarboxylating, acceptor-succinylating)	2-oxoglutarate:[dihydrolipoyllysine-residue succinyltransferase]-lipoyllysine 2-oxidoreductase (decarboxylating, acceptor-succinylating)	2-Oxoglutarate + Enzyme N6-(lipoyl)lysine <=> [Dihydrolipoyllysine-residue succinyltransferase] S-succinyldihydrolipoyllysine + CO2	C00026 + C15972 <=> C16254 + C00011	KEGG	1.2.4.2	1.2.4.2
R01701	3-methyl-2-oxobutanoate:[dihydrolipoyllysine-residue (2-methylpropanoyl)transferase] lipoyllysine 2-oxidoreductase (decarboxylating, acceptor-2-methylpropanoylating)	3-methyl-2-oxobutanoate:[dihydrolipoyllysine-residue (2-methylpropanoyl)transferase] lipoyllysine 2-oxidoreductase (decarboxylating, acceptor-2-methylpropanoylating)	3-Methyl-2-oxobutanoic acid + Enzyme N6-(lipoyl)lysine <=> [Dihydrolipoyllysine-residue (2-methylpropanoyl)transferase] S-(2-methylpropanoyl)dihydrolipoyllysine + CO2	C00141 + C15972 <=> C15977 + C00011	KEGG	1.2.4.4	1.2.4.4
R01702	4-methyl-2-oxopentanoate:[dihydrolipoyllysine-residue (2-methylpropanoyl)transferase] lipoyllysine 2-oxidoreductase (decarboxylating, acceptor-2-methylpropanoylating)	4-methyl-2-oxopentanoate:[dihydrolipoyllysine-residue (2-methylpropanoyl)transferase] lipoyllysine 2-oxidoreductase (decarboxylating, acceptor-2-methylpropanoylating)	4-Methyl-2-oxopentanoate + Enzyme N6-(lipoyl)lysine <=> [Dihydrolipoyllysine-residue (2-methylpropanoyl)transferase] S-(3-methylbutanoyl)dihydrolipoyllysine + CO2	C00233 + C15972 <=> C15975 + C00011	KEGG	1.2.4.4	1.2.4.4
R01703	Hexadecanoate:hydrogen-peroxide oxidoreductase	Hexadecanoate:hydrogen-peroxide oxidoreductase	Hexadecanoic acid + 2 Hydrogen peroxide <=> Pentadecanal + CO2 + 3 H2O	C00249 + 2 C00027 <=> C01948 + C00011 + 3 C00001	KEGG	1.11.1.3	1.11.1.3
R01704	Palmitaldehyde:NAD+ oxidoreductase	Palmitaldehyde:NAD+ oxidoreductase	Hexadecanal + NAD+ + H2O <=> Hexadecanoic acid + NADH + H+	C00517 + C00003 + C00001 <=> C00249 + C00004 + C00080	KEGG	1.2.1.48	1.2.1.48
R01705	Palmitoyl-protein hydrolase	Palmitoyl-protein hydrolase	Hexadecanoic acid + Protein <=> Palmitoyl-protein + H2O	C00249 + C00017 <=> C06412 + C00001	KEGG	3.1.2.22	3.1.2.22
R01706	Oleoyl-[acyl-carrier protein] hydrolase	Oleoyl-[acyl-carrier protein] hydrolase	Hexadecanoyl-[acp] + H2O <=> Acyl-carrier protein + Hexadecanoic acid	C05764 + C00001 <=> C00229 + C00249	KEGG	2.3.1.85，3.1.2.14	2.3.1.85
R01707	Pyridoxal:NAD+ 4-oxidoreductase	Pyridoxal:NAD+ 4-oxidoreductase	Pyridoxal + NAD+ <=> 4-Pyridoxolactone + NADH + H+	C00250 + C00003 <=> C00971 + C00004 + C00080	KEGG	1.1.1.107	1.1.1.107
R01708	Pyridoxine:NADP+ 4-oxidoreductase	Pyridoxine:NADP+ 4-oxidoreductase	Pyridoxine + NADP+ <=> Pyridoxal + NADPH + H+	C00314 + C00006 <=> C00250 + C00005 + C00080	KEGG	1.1.1.65	1.1.1.65
R01709	Pyridoxal:oxygen 4-oxidoreductase	Pyridoxal:oxygen 4-oxidoreductase	Pyridoxal + Oxygen + H2O <=> 4-Pyridoxate + Hydrogen peroxide	C00250 + C00007 + C00001 <=> C00847 + C00027	KEGG	1.2.3.1，1.2.3.8	1.2.3.1
R01710	Pyridoxamine:oxygen oxidoreductase (deaminating)	Pyridoxamine:oxygen oxidoreductase (deaminating)	Pyridoxamine + H2O + Oxygen <=> Pyridoxal + NH3 + Hydrogen peroxide	C00534 + C00001 + C00007 <=> C00250 + C00014 + C00027	KEGG	1.4.3.5	1.4.3.5
R01711	Pyridoxine:oxygen oxidoreductase (deaminating)	Pyridoxine:oxygen oxidoreductase (deaminating)	Pyridoxine + Oxygen <=> Pyridoxal + Hydrogen peroxide	C00314 + C00007 <=> C00250 + C00027	KEGG	1.1.3.12，1.4.3.5	1.1.3.12
R01712	Pyridoxamine:pyruvate aminotransferase	Pyridoxamine:pyruvate aminotransferase	Pyridoxamine + Pyruvate <=> Pyridoxal + L-Alanine	C00534 + C00022 <=> C00250 + C00041	KEGG	2.6.1.30	2.6.1.30
R01713	Pyridoxamine:oxaloacetate aminotransferase	Pyridoxamine:oxaloacetate aminotransferase	Pyridoxamine + Oxaloacetate <=> Pyridoxal + L-Aspartate	C00534 + C00036 <=> C00250 + C00049	KEGG	2.6.1.31	2.6.1.31
R01714	5-O-(1-Carboxyvinyl)-3-phosphoshikimate phosphate-lyase (chorismate-forming)	5-O-(1-Carboxyvinyl)-3-phosphoshikimate phosphate-lyase (chorismate-forming)	5-O-(1-Carboxyvinyl)-3-phosphoshikimate <=> Chorismate + Orthophosphate	C01269 <=> C00251 + C00009	KEGG	4.2.3.5	4.2.3.5
R01715	Chorismate pyruvatemutase	Chorismate pyruvatemutase	Chorismate <=> Prephenate	C00251 <=> C00254	KEGG	5.4.99.5	5.4.99.5
R01716	chorismate:L-glutamine aminotransferase	chorismate:L-glutamine aminotransferase	Chorismate + L-Glutamine <=> 4-Amino-4-deoxychorismate + L-Glutamate	C00251 + C00064 <=> C11355 + C00025	KEGG	2.6.1.85	2.6.1.85
R01717	chorismate hydroxymutase	chorismate hydroxymutase	Chorismate <=> Isochorismate	C00251 <=> C00885	KEGG	5.4.4.2	5.4.4.2
R01718	Isomaltose 6-alpha-D-glucanohydrolase	Isomaltose 6-alpha-D-glucanohydrolase	Isomaltose + H2O <=> alpha-D-Glucose + D-Glucose	C00252 + C00001 <=> C00267 + C00031	KEGG	3.2.1.10	3.2.1.10
R01720	nicotinate:NADP+ 6-oxidoreductase (hydroxylating)	nicotinate:NADP+ 6-oxidoreductase (hydroxylating)	Nicotinate + NADP+ + H2O <=> 6-Hydroxynicotinate + NADPH + H+	C00253 + C00006 + C00001 <=> C01020 + C00005 + C00080	KEGG	1.17.1.5	1.17.1.5
R01721	S-Adenosyl-L-methionine:nicotinate N-methyltransferase	S-Adenosyl-L-methionine:nicotinate N-methyltransferase	S-Adenosyl-L-methionine + Nicotinate <=> S-Adenosyl-L-homocysteine + N-Methylnicotinate	C00019 + C00253 <=> C00021 + C01004	KEGG	2.1.1.7	2.1.1.7
R01722	UDP-glucose:nicotinate N-glucosyltransferase	UDP-glucose:nicotinate N-glucosyltransferase	UDP-glucose + Nicotinate <=> UDP + N-Glucosylnicotinate	C00029 + C00253 <=> C00015 + C03003	KEGG	2.4.1.196	2.4.1.196
R01723	NO NAME	NO NAME	Nicotinate + Glycine + ATP <=> Nicotinurate + AMP + Diphosphate	C00253 + C00037 + C00002 <=> C05380 + C00020 + C00013	KEGG
R01724	Nicotinate D-ribonucleotide:diphosphate phosphoribosyltransferase	Nicotinate D-ribonucleotide:diphosphate phosphoribosyltransferase	Nicotinate D-ribonucleotide + Diphosphate <=> Nicotinate + 5-Phospho-alpha-D-ribose 1-diphosphate	C01185 + C00013 <=> C00253 + C00119	KEGG	2.4.2.11	2.4.2.11
R01725	NO NAME	NO NAME	Nicotinate <=> 2-Methyleneglutarate	C00253 <=> C02930	KEGG
R01728	Prephenate:NAD+ oxidoreductase(decarboxylating)	Prephenate:NAD+ oxidoreductase(decarboxylating)	Prephenate + NAD+ <=> 3-(4-Hydroxyphenyl)pyruvate + CO2 + NADH + H+	C00254 + C00003 <=> C01179 + C00011 + C00004 + C00080	KEGG	1.3.1.12	1.3.1.12
R01730	Prephenate:NADP+ oxidoreductase(decarboxylating)	Prephenate:NADP+ oxidoreductase(decarboxylating)	Prephenate + NADP+ <=> 3-(4-Hydroxyphenyl)pyruvate + CO2 + NADPH + H+	C00254 + C00006 <=> C01179 + C00011 + C00005 + C00080	KEGG	1.3.1.13	1.3.1.13
R01731	L-arogenate:2-oxoglutarate aminotransferase	L-arogenate:2-oxoglutarate aminotransferase	Oxaloacetate + L-Arogenate <=> L-Aspartate + Prephenate	C00036 + C00826 <=> C00049 + C00254	KEGG	2.6.1.57，2.6.1.78	2.6.1.57
R01732	Riboflavin hydrolase	Riboflavin hydrolase	Riboflavin + H2O <=> Ribitol + Lumichrome	C00255 + C00001 <=> C00474 + C01727	KEGG	3.5.99.1	3.5.99.1
R01734	NO NAME	NO NAME	Dimethylbenzimidazole <=> Riboflavin	C03114 <=> C00255	KEGG
R01735	(R)-Lactaldehyde:NAD+ 2-oxidoreductase	(R)-Lactaldehyde:NAD+ 2-oxidoreductase	(R)-Lactaldehyde + NAD+ + H2O <=> (R)-Lactate + NADH + H+	C00937 + C00003 + C00001 <=> C00256 + C00004 + C00080	KEGG	1.2.1.23	1.2.1.23
R01736	(R)-S-Lactoylglutathione hydrolase	(R)-S-Lactoylglutathione hydrolase	(R)-S-Lactoylglutathione + H2O <=> Glutathione + (R)-Lactate	C03451 + C00001 <=> C00051 + C00256	KEGG	3.1.2.6	3.1.2.6
R01737	ATP:D-Gluconate 6-phosphotransferase	ATP:D-Gluconate 6-phosphotransferase	ATP + D-Gluconic acid <=> ADP + 6-Phospho-D-gluconate	C00002 + C00257 <=> C00008 + C00345	KEGG	2.7.1.12	2.7.1.12
R01738	D-Gluconate:NAD+ 5-oxidoreductase	D-Gluconate:NAD+ 5-oxidoreductase	D-Gluconic acid + NAD+ <=> 5-Dehydro-D-gluconate + NADH + H+	C00257 + C00003 <=> C01062 + C00004 + C00080	KEGG	1.1.1.69	1.1.1.69
R01739	D-gluconate:NADP+ 2-oxidoreductase	D-gluconate:NADP+ 2-oxidoreductase	D-Gluconic acid + NADP+ <=> 2-Keto-D-gluconic acid + NADPH + H+	C00257 + C00006 <=> C06473 + C00005 + C00080	KEGG	1.1.1.215	1.1.1.215
R01740	D-Gluconate:NADP+ 5-oxidoreductase	D-Gluconate:NADP+ 5-oxidoreductase	D-Gluconic acid + NADP+ <=> 5-Dehydro-D-gluconate + NADPH + H+	C00257 + C00006 <=> C01062 + C00005 + C00080	KEGG	1.1.1.69	1.1.1.69
R01741	D-Gluconate:(acceptor) 2-oxidoreductase	D-Gluconate:(acceptor) 2-oxidoreductase	D-Gluconic acid + FAD <=> 2-Keto-D-gluconic acid + FADH2	C00257 + C00016 <=> C06473 + C01352	KEGG	1.1.99.3	1.1.99.3
R01742	D-Gluconate:acceptor 2-oxidoreductase	D-Gluconate:acceptor 2-oxidoreductase	D-Gluconic acid + Acceptor <=> 2-Keto-D-gluconic acid + Reduced acceptor	C00257 + C00028 <=> C06473 + C00030	KEGG	1.1.99.3	1.1.99.3
R01745	(R)-Glycerate:NAD+ oxidoreductase	(R)-Glycerate:NAD+ oxidoreductase	D-Glycerate + NAD+ <=> 2-Hydroxy-3-oxopropanoate + NADH + H+	C00258 + C00003 <=> C01146 + C00004 + C00080	KEGG	1.1.1.60	1.1.1.60
R01747	(R)-Glycerate:NADP+ oxidoreductase	(R)-Glycerate:NADP+ oxidoreductase	D-Glycerate + NADP+ <=> 2-Hydroxy-3-oxopropanoate + NADPH + H+	C00258 + C00006 <=> C01146 + C00005 + C00080	KEGG	1.1.1.60	1.1.1.60
R01748	D-Glycerate-2-phosphate phosphohydrolase	D-Glycerate-2-phosphate phosphohydrolase	2-Phospho-D-glycerate + H2O <=> D-Glycerate + Orthophosphate	C00631 + C00001 <=> C00258 + C00009	KEGG	3.1.3.20	3.1.3.20
R01749	D-Glycerate:NAD+ oxidoreductase (carboxylating)	D-Glycerate:NAD+ oxidoreductase (carboxylating)	D-Glycerate + NAD+ + CO2 <=> 2-Hydroxy-3-oxosuccinate + NADH + H+	C00258 + C00003 + C00011 <=> C03459 + C00004 + C00080	KEGG	1.1.1.92	1.1.1.92
R01750	D-Glycerate:NADP+ oxidoreductase (carboxylating)	D-Glycerate:NADP+ oxidoreductase (carboxylating)	D-Glycerate + NADP+ + CO2 <=> 2-Hydroxy-3-oxosuccinate + NADPH + H+	C00258 + C00006 + C00011 <=> C03459 + C00005 + C00080	KEGG	1.1.1.92	1.1.1.92
R01751	(R,R)-tartrate carboxy-lyase (D-glycerate-forming)	(R,R)-tartrate carboxy-lyase (D-glycerate-forming)	(R,R)-Tartaric acid <=> D-Glycerate + CO2	C00898 <=> C00258 + C00011	KEGG	4.1.1.73	4.1.1.73
R01752	D-Glyceraldehyde:NAD+ oxidoreductase	D-Glyceraldehyde:NAD+ oxidoreductase	D-Glyceraldehyde + NAD+ + H2O <=> D-Glycerate + NADH + H+	C00577 + C00003 + C00001 <=> C00258 + C00004 + C00080	KEGG	1.2.1.3	1.2.1.3
R01754	ATP:L-arabinose 1-phosphotransferase	ATP:L-arabinose 1-phosphotransferase	ATP + L-Arabinose <=> ADP + beta-L-Arabinose 1-phosphate	C00002 + C00259 <=> C00008 + C03906	KEGG	2.7.1.46	2.7.1.46
R01757	L-Arabinose:NAD+ 1-oxidoreductase	L-Arabinose:NAD+ 1-oxidoreductase	L-Arabinose + NAD+ <=> L-Arabinono-1,4-lactone + NADH + H+	C00259 + C00003 <=> C01114 + C00004 + C00080	KEGG	1.1.1.46	1.1.1.46
R01758	L-Arabitol:NAD+ 1-oxidoreductase	L-Arabitol:NAD+ 1-oxidoreductase	L-Arabitol + NAD+ <=> L-Arabinose + NADH + H+	C00532 + C00003 <=> C00259 + C00004 + C00080	KEGG	1.1.1.21	1.1.1.21
R01759	L-Arabitol:NADP+ 1-oxidoreductase	L-Arabitol:NADP+ 1-oxidoreductase	L-Arabitol + NADP+ <=> L-Arabinose + NADPH + H+	C00532 + C00006 <=> C00259 + C00005 + C00080	KEGG	1.1.1.21	1.1.1.21
R01760	beta-L-Arabinoside arabinohydrolase	beta-L-Arabinoside arabinohydrolase	beta-L-Arabinoside + H2O <=> Alcohol + L-Arabinose	C02761 + C00001 <=> C00069 + C00259	KEGG	3.2.1.88	3.2.1.88
R01761	L-Arabinose aldose-ketose-isomerase	L-Arabinose aldose-ketose-isomerase	L-Arabinose <=> L-Ribulose	C00259 <=> C00508	KEGG	5.3.1.4	5.3.1.4
R01762	alpha-L-Arabinan arabinofuranohydrolase	alpha-L-Arabinan arabinofuranohydrolase	Arabinan + H2O <=> Arabinan + L-Arabinose	C02474 + C00001 <=> C02474 + C00259	KEGG	3.2.1.55	3.2.1.55
R01763	Benzyl alcohol:NAD+ oxidoreductase	Benzyl alcohol:NAD+ oxidoreductase	Benzyl alcohol + NAD+ <=> Benzaldehyde + NADH + H+	C00556 + C00003 <=> C00261 + C00004 + C00080	KEGG	1.1.1.90	1.1.1.90
R01764	benzoylformate carboxy-lyase (benzaldehyde-forming)	benzoylformate carboxy-lyase (benzaldehyde-forming)	alpha-Oxo-benzeneacetic acid <=> Benzaldehyde + CO2	C02137 <=> C00261 + C00011	KEGG	4.1.1.7	4.1.1.7
R01766	L-threo-3-Phenylserine benzaldehyde-lyase (glycine-forming)	L-threo-3-Phenylserine benzaldehyde-lyase (glycine-forming)	L-threo-3-Phenylserine <=> Glycine + Benzaldehyde	C03290 <=> C00037 + C00261	KEGG	4.1.2.26	4.1.2.26
R01767	Mandelonitrile benzaldehyde-lyase (cyanide-forming)	Mandelonitrile benzaldehyde-lyase (cyanide-forming)	Mandelonitrile <=> Cyanide + Benzaldehyde	C00561 <=> C00177 + C00261	KEGG	4.1.2.10	4.1.2.10
R01768	hypoxanthine:NAD+ oxidoreductase	hypoxanthine:NAD+ oxidoreductase	Hypoxanthine + NAD+ + H2O <=> Xanthine + NADH + H+	C00262 + C00003 + C00001 <=> C00385 + C00004 + C00080	KEGG	1.17.1.4	1.17.1.4
R01769	Hypoxanthine:oxygen oxidoreductase	Hypoxanthine:oxygen oxidoreductase	Hypoxanthine + Oxygen + H2O <=> Xanthine + Hydrogen peroxide	C00262 + C00007 + C00001 <=> C00385 + C00027	KEGG	1.17.3.2	1.17.3.2
R01770	Inosine ribohydrolase	Inosine ribohydrolase	Inosine + H2O <=> Hypoxanthine + D-Ribose	C00294 + C00001 <=> C00262 + C00121	KEGG	3.2.2.1，3.2.2.2，3.2.2.8	3.2.2.1
R01771	ATP:L-homoserine O-phosphotransferase	ATP:L-homoserine O-phosphotransferase	ATP + L-Homoserine <=> ADP + O-Phospho-L-homoserine	C00002 + C00263 <=> C00008 + C01102	KEGG	2.7.1.39	2.7.1.39
R01773	L-Homoserine:NAD+ oxidoreductase	L-Homoserine:NAD+ oxidoreductase	L-Homoserine + NAD+ <=> L-Aspartate 4-semialdehyde + NADH + H+	C00263 + C00003 <=> C00441 + C00004 + C00080	KEGG	1.1.1.3	1.1.1.3
R01775	L-homoserine:NADP+ oxidoreductase	L-homoserine:NADP+ oxidoreductase	L-Homoserine + NADP+ <=> L-Aspartate 4-semialdehyde + NADPH + H+	C00263 + C00006 <=> C00441 + C00005 + C00080	KEGG	1.1.1.3	1.1.1.3
R01776	Acetyl-CoA:L-homoserine O-acetyltransferase	Acetyl-CoA:L-homoserine O-acetyltransferase	Acetyl-CoA + L-Homoserine <=> CoA + O-Acetyl-L-homoserine	C00024 + C00263 <=> C00010 + C01077	KEGG	2.3.1.31	2.3.1.31
R01777	Succinyl-CoA:L-homoserine O-succinyltransferase	Succinyl-CoA:L-homoserine O-succinyltransferase	Succinyl-CoA + L-Homoserine <=> CoA + O-Succinyl-L-homoserine	C00091 + C00263 <=> C00010 + C01118	KEGG	2.3.1.46	2.3.1.46
R01778	(3S)-3-Hydroxyacyl-CoA:NAD+ oxidoreductase	(3S)-3-Hydroxyacyl-CoA:NAD+ oxidoreductase	(3S)-3-Hydroxyacyl-CoA + NAD+ <=> 3-Oxoacyl-CoA + NADH + H+	C00640 + C00003 <=> C00264 + C00004 + C00080	KEGG	1.1.1.35，1.1.1.211	1.1.1.35
R01779	(3R)-3-Hydroxyacyl-CoA:NADP+ oxidoreductase	(3R)-3-Hydroxyacyl-CoA:NADP+ oxidoreductase	(3R)-3-Hydroxyacyl-CoA + NADP+ <=> 3-Oxoacyl-CoA + NADPH + H+	C01086 + C00006 <=> C00264 + C00005 + C00080	KEGG	1.1.1.36	1.1.1.36
R01780	Succinyl-CoA:3-oxo-acid CoA-transferase	Succinyl-CoA:3-oxo-acid CoA-transferase	Succinyl-CoA + 3-Oxo acid <=> Succinate + 3-Oxoacyl-CoA	C00091 + C01656 <=> C00042 + C00264	KEGG	2.8.3.5	2.8.3.5
R01781	1,2-Ethanediol:NAD+ oxidoreductase	1,2-Ethanediol:NAD+ oxidoreductase	Ethylene glycol + NAD+ <=> Glycolaldehyde + NADH + H+	C01380 + C00003 <=> C00266 + C00004 + C00080	KEGG	1.1.1.77	1.1.1.77
R01782	2-dehydro-3-deoxy-D-pentonate glycolaldehyde-lyase (pyruvate-forming)	2-dehydro-3-deoxy-D-pentonate glycolaldehyde-lyase (pyruvate-forming)	2-Dehydro-3-deoxy-D-xylonate <=> Pyruvate + Glycolaldehyde	C03826 <=> C00022 + C00266	KEGG	4.1.2.28	4.1.2.28
R01784	2-dehydro-3-deoxy-L-pentonate glycolaldehyde-lyase (pyruvate-forming)	2-dehydro-3-deoxy-L-pentonate glycolaldehyde-lyase (pyruvate-forming)	2-Dehydro-3-deoxy-L-arabinonate <=> Pyruvate + Glycolaldehyde	C00684 <=> C00022 + C00266	KEGG	4.1.2.18	4.1.2.18
R01785	L-xylulose 1-phosphate glycolaldehyde-lyase (glycerone-phosphate-forming)	L-xylulose 1-phosphate glycolaldehyde-lyase (glycerone-phosphate-forming)	L-Xylulose 1-phosphate <=> Glycerone phosphate + Glycolaldehyde	C06441 <=> C00111 + C00266	KEGG	4.1.2.19	4.1.2.19
R01786	ATP:alpha-D-glucose 6-phosphotransferase	ATP:alpha-D-glucose 6-phosphotransferase	ATP + alpha-D-Glucose <=> ADP + alpha-D-Glucose 6-phosphate	C00002 + C00267 <=> C00008 + C00668	KEGG	2.7.1.1，2.7.1.2	2.7.1.1
R01787	D-Glucitol:NADP+ 1-oxidoreductase	D-Glucitol:NADP+ 1-oxidoreductase	D-Sorbitol + NADP+ <=> alpha-D-Glucose + NADPH + H+	C00794 + C00006 <=> C00267 + C00005 + C00080	KEGG	1.1.1.21	1.1.1.21
R01788	alpha-D-Glucose 6-phosphate phosphohydrolase	alpha-D-Glucose 6-phosphate phosphohydrolase	alpha-D-Glucose 6-phosphate + H2O <=> alpha-D-Glucose + Orthophosphate	C00668 + C00001 <=> C00267 + C00009	KEGG	3.1.3.9	3.1.3.9
R01790	1,4-alpha-D-Glucan glucohydrolase	1,4-alpha-D-Glucan glucohydrolase	Starch + H2O <=> alpha-D-Glucose + Starch	C00369 + C00001 <=> C00267 + C00369	KEGG	3.2.1.3	3.2.1.3
R01791	Dextrin 6-alpha-D-glucanohydrolase	Dextrin 6-alpha-D-glucanohydrolase	Dextrin + H2O <=> alpha-D-Glucose + Dextrin	C00721 + C00001 <=> C00267 + C00721	KEGG	3.2.1.3，3.2.1.10	3.2.1.3
R01793	5,6,7,8-tetrahydrobiopterin:NAD+ oxidoreductase	5,6,7,8-tetrahydrobiopterin:NAD+ oxidoreductase	Dihydrobiopterin + NADH + H+ <=> Tetrahydrobiopterin + NAD+	C00268 + C00004 + C00080 <=> C00272 + C00003	KEGG	1.5.1.34	1.5.1.34
R01794	5,6,7,8-tetrahydrobiopterin:NADP+ oxidoreductase	5,6,7,8-tetrahydrobiopterin:NADP+ oxidoreductase	Dihydrobiopterin + NADPH + H+ <=> Tetrahydrobiopterin + NADP+	C00268 + C00005 + C00080 <=> C00272 + C00006	KEGG	1.5.1.34	1.5.1.34
R01795	L-Phenylalanine,tetrahydrobiopterin:oxygen oxidoreductase (4-hydroxylating)	L-Phenylalanine,tetrahydrobiopterin:oxygen oxidoreductase (4-hydroxylating)	Tetrahydrobiopterin + L-Phenylalanine + Oxygen <=> Dihydrobiopterin + L-Tyrosine + H2O	C00272 + C00079 + C00007 <=> C00268 + C00082 + C00001	KEGG	1.14.16.1	1.14.16.1
R01797	CDP-diacylglycerol phosphatidylhydrolase	CDP-diacylglycerol phosphatidylhydrolase	CDP-diacylglycerol + H2O <=> CMP + Phosphatidate	C00269 + C00001 <=> C00055 + C00416	KEGG	3.6.1.26	3.6.1.26
R01798	Arachidonyl-CoA:CDPacylglycerol O-arachidonyltransferase	Arachidonyl-CoA:CDPacylglycerol O-arachidonyltransferase	Arachidonyl-CoA + CDP-acylglycerol <=> CoA + CDP-diacylglycerol	C02249 + C02255 <=> C00010 + C00269	KEGG
R01799	CTP:phosphatidate cytidyltransferase	CTP:phosphatidate cytidyltransferase	CTP + Phosphatidate <=> Diphosphate + CDP-diacylglycerol	C00063 + C00416 <=> C00013 + C00269	KEGG	2.7.7.41	2.7.7.41
R01800	CDP-diacylglycerol:L-serine 3-phosphatidyltransferase	CDP-diacylglycerol:L-serine 3-phosphatidyltransferase	CDP-diacylglycerol + L-Serine <=> CMP + Phosphatidylserine	C00269 + C00065 <=> C00055 + C02737	KEGG	2.7.8.8	2.7.8.8
R01801	CDP-diacylglycerol:sn-glycerol-3-phosphate 3-phosphatidyltransferase	CDP-diacylglycerol:sn-glycerol-3-phosphate 3-phosphatidyltransferase	CDP-diacylglycerol + sn-Glycerol 3-phosphate <=> CMP + Phosphatidylglycerophosphate	C00269 + C00093 <=> C00055 + C03892	KEGG	2.7.8.5	2.7.8.5
R01802	CDP-diacylglycerol:myo-inositol 3-phosphatidyltransferase	CDP-diacylglycerol:myo-inositol 3-phosphatidyltransferase	CDP-diacylglycerol + myo-Inositol <=> CMP + 1-Phosphatidyl-D-myo-inositol	C00269 + C00137 <=> C00055 + C01194	KEGG	2.7.8.11	2.7.8.11
R01803	N-acetylneuraminate,ferrocytochrome-b5:oxygen oxidoreductase (N-acetyl-hydroxylating)	N-acetylneuraminate,ferrocytochrome-b5:oxygen oxidoreductase (N-acetyl-hydroxylating)	N-Acetylneuraminate + 2 Ferrocytochrome b5 + Oxygen + 2 H+ <=> N-Glycoloyl-neuraminate + 2 Ferricytochrome b5 + H2O	C00270 + 2 C00999 + C00007 + 2 C00080 <=> C03410 + 2 C00996 + C00001	KEGG	1.14.18.2	1.14.18.2
R01804	phosphoenolpyruvate:N-acetyl-D-mannosamine C-(1-carboxyvinyl)transferase (phosphate-hydrolysing, 2-carboxy-2-oxoethyl-forming)	phosphoenolpyruvate:N-acetyl-D-mannosamine C-(1-carboxyvinyl)transferase (phosphate-hydrolysing, 2-carboxy-2-oxoethyl-forming)	N-Acetylneuraminate + Orthophosphate <=> N-Acetyl-D-mannosamine + Phosphoenolpyruvate + H2O	C00270 + C00009 <=> C00645 + C00074 + C00001	KEGG	2.5.1.56	2.5.1.56
R01805	N-Acetylneuraminate 9-phosphate phosphohydrolase	N-Acetylneuraminate 9-phosphate phosphohydrolase	N-Acetylneuraminate 9-phosphate + H2O <=> N-Acetylneuraminate + Orthophosphate	C06241 + C00001 <=> C00270 + C00009	KEGG	3.1.3.29	3.1.3.29
R01806	Acetyl-CoA:N-acetylneuraminate 4-O-acetyltransferase	Acetyl-CoA:N-acetylneuraminate 4-O-acetyltransferase	Acetyl-CoA + N-Acetylneuraminate <=> CoA + N-Acetyl-4-O-acetylneuraminate	C00024 + C00270 <=> C00010 + C04015	KEGG	2.3.1.44	2.3.1.44
R01807	Acetyl-CoA:N-acetylneuraminate 7-O-acetyltransferase	Acetyl-CoA:N-acetylneuraminate 7-O-acetyltransferase	Acetyl-CoA + N-Acetylneuraminate <=> CoA + N-Acetyl-7-O-acetylneuraminate	C00024 + C00270 <=> C00010 + C04016	KEGG	2.3.1.45	2.3.1.45
R01808	Acetyl-CoA:N-acetylneuraminate 9-O-acetyltransferase	Acetyl-CoA:N-acetylneuraminate 9-O-acetyltransferase	Acetyl-CoA + N-Acetylneuraminate <=> CoA + N-Acetyl-9-O-acetylneuraminate	C00024 + C00270 <=> C00010 + C04017	KEGG	2.3.1.45	2.3.1.45
R01810	N-Acyl-O-acetylneuraminate O-acetylesterase	N-Acyl-O-acetylneuraminate O-acetylesterase	N-Acetyl-O-acetylneuraminate + H2O <=> N-Acetylneuraminate + Acetate	C03708 + C00001 <=> C00270 + C00033	KEGG	3.1.1.53	3.1.1.53
R01811	N-Acetylneuraminate pyruvate-lyase (N-acetyl-D-mannosamine-forming)	N-Acetylneuraminate pyruvate-lyase (N-acetyl-D-mannosamine-forming)	N-Acetylneuraminate <=> N-Acetyl-D-mannosamine + Pyruvate	C00270 <=> C00645 + C00022	KEGG	4.1.3.3	4.1.3.3
R01812	5,6,7,8-Tetrahydrobiopterin:NADP+ oxidoreductase	5,6,7,8-Tetrahydrobiopterin:NADP+ oxidoreductase	Tetrahydrobiopterin + 2 NADP+ <=> Biopterin + 2 NADPH + 2 H+	C00272 + 2 C00006 <=> C06313 + 2 C00005 + 2 C00080	KEGG	1.5.1.33	1.5.1.33
R01813	Tetrahydrobiopterin:NADP+ oxidoreductase	Tetrahydrobiopterin:NADP+ oxidoreductase	Tetrahydrobiopterin + NADP+ <=> 6-Lactoyl-5,6,7,8-tetrahydropterin + NADPH + H+	C00272 + C00006 <=> C04244 + C00005 + C00080	KEGG	1.1.1.153	1.1.1.153
R01814	L-Tryptophan,tetrahydrobiopterin:oxygen oxidoreductase (5-hydroxylating)	L-Tryptophan,tetrahydrobiopterin:oxygen oxidoreductase (5-hydroxylating)	Tetrahydrobiopterin + L-Tryptophan + Oxygen <=> 5-Hydroxy-L-tryptophan + Dihydrobiopterin + H2O	C00272 + C00078 + C00007 <=> C00643 + C00268 + C00001	KEGG	1.14.16.4	1.14.16.4
R01815	L-Tyrosine,tetrahydrobiopterin:oxygen oxidoreductase (3-hydroxylating)	L-Tyrosine,tetrahydrobiopterin:oxygen oxidoreductase (3-hydroxylating)	Tetrahydrobiopterin + L-Tyrosine + Oxygen <=> 3,4-Dihydroxy-L-phenylalanine + Dihydrobiopterin + H2O	C00272 + C00082 + C00007 <=> C00355 + C00268 + C00001	KEGG	1.14.16.2	1.14.16.2
R01816	Anthranilate,tetrahydrobiopterin:oxygen oxidoreductase (3-hydroxylating)	Anthranilate,tetrahydrobiopterin:oxygen oxidoreductase (3-hydroxylating)	Tetrahydrobiopterin + Anthranilate + Oxygen <=> 3-Hydroxyanthranilate + Dihydrobiopterin + H2O	C00272 + C00108 + C00007 <=> C00632 + C00268 + C00001	KEGG	1.14.16.3	1.14.16.3
R01817	D-mannitol-1-phosphate:NADP+ 6-oxidoreductase	D-mannitol-1-phosphate:NADP+ 6-oxidoreductase	D-Mannitol 1-phosphate + NADP+ <=> D-Mannose 6-phosphate + NADPH + H+	C00644 + C00006 <=> C00275 + C00005 + C00080	KEGG	1.1.1.224	1.1.1.224
R01818	D-Mannose 6-phosphate 1,6-phosphomutase	D-Mannose 6-phosphate 1,6-phosphomutase	D-Mannose 6-phosphate <=> D-Mannose 1-phosphate	C00275 <=> C00636	KEGG	5.4.2.8	5.4.2.8
R01819	D-mannose-6-phosphate aldose-ketose-isomerase	D-mannose-6-phosphate aldose-ketose-isomerase	D-Mannose 6-phosphate <=> beta-D-Fructose 6-phosphate	C00275 <=> C05345	KEGG	5.3.1.8	5.3.1.8
R01821	1,4-alpha-D-Glucan:orthophosphate alpha-D-glucosyltransferase	1,4-alpha-D-Glucan:orthophosphate alpha-D-glucosyltransferase	Amylose + Orthophosphate <=> Amylose + D-Glucose 1-phosphate	C00718 + C00009 <=> C00718 + C00103	KEGG	2.4.1.1	2.4.1.1
R01823	Sucrose:1,4-alpha-D-glucan 4-alpha-D-glucosyltransferase	Sucrose:1,4-alpha-D-glucan 4-alpha-D-glucosyltransferase	Sucrose + Amylose <=> D-Fructose + Amylose	C00089 + C00718 <=> C00095 + C00718	KEGG	2.4.1.4	2.4.1.4
R01824	1,4-alpha-D-Glucan 1-alpha-D-glucosylmutase	1,4-alpha-D-Glucan 1-alpha-D-glucosylmutase	Amylose <=> 1-alpha-D-{(1,4)-alpha-D-Glucosyl}(n-1)-alpha-D-glucopyranoside	C00718 <=> C06400	KEGG	5.4.99.15	5.4.99.15
R01825	D-erythrose 4-phosphate:NAD+ oxidoreductase	D-erythrose 4-phosphate:NAD+ oxidoreductase	D-Erythrose 4-phosphate + NAD+ + H2O <=> 4-Phospho-D-erythronate + NADH + H+	C00279 + C00003 + C00001 <=> C03393 + C00004 + C00080	KEGG	1.2.1.72	1.2.1.72
R01826	Phosphoenolpyruvate:D-erythrose-4-phosphate C-(1-carboxyvinyl)transferase (phosphate hydrolysing, 2-carboxy-2-oxoethyl-forming)	Phosphoenolpyruvate:D-erythrose-4-phosphate C-(1-carboxyvinyl)transferase (phosphate hydrolysing, 2-carboxy-2-oxoethyl-forming)	Phosphoenolpyruvate + D-Erythrose 4-phosphate + H2O <=> 2-Dehydro-3-deoxy-D-arabino-heptonate 7-phosphate + Orthophosphate	C00074 + C00279 + C00001 <=> C04691 + C00009	KEGG	2.5.1.54	2.5.1.54
R01827	sedoheptulose-7-phosphate:D-glyceraldehyde-3-phosphate glyceronetransferase	sedoheptulose-7-phosphate:D-glyceraldehyde-3-phosphate glyceronetransferase	Sedoheptulose 7-phosphate + D-Glyceraldehyde 3-phosphate <=> D-Erythrose 4-phosphate + beta-D-Fructose 6-phosphate	C05382 + C00118 <=> C00279 + C05345	KEGG	2.2.1.2	2.2.1.2
R01829	Sedoheptulose 1,7-bisphosphate D-glyceraldehyde-3-phosphate-lyase	Sedoheptulose 1,7-bisphosphate D-glyceraldehyde-3-phosphate-lyase	Sedoheptulose 1,7-bisphosphate <=> Glycerone phosphate + D-Erythrose 4-phosphate	C00447 <=> C00111 + C00279	KEGG	4.1.2.13	4.1.2.13
R01830	beta-D-Fructose 6-phosphate:D-glyceraldehyde-3-phosphate glycolaldehyde transferase	beta-D-Fructose 6-phosphate:D-glyceraldehyde-3-phosphate glycolaldehyde transferase	beta-D-Fructose 6-phosphate + D-Glyceraldehyde 3-phosphate <=> D-Erythrose 4-phosphate + D-Xylulose 5-phosphate	C05345 + C00118 <=> C00279 + C00231	KEGG	2.2.1.1	2.2.1.1
R01833	Androst-4-ene-3,17-dione,hydrogen-donor:oxygen oxidoreductase (13-hydroxylating, lactonizing)	Androst-4-ene-3,17-dione,hydrogen-donor:oxygen oxidoreductase (13-hydroxylating, lactonizing)	Androstenedione + Reduced acceptor + Oxygen <=> Testololactone + Acceptor + H2O	C00280 + C00030 + C00007 <=> C04676 + C00028 + C00001	KEGG	1.14.99.12	1.14.99.12
R01834	3-Oxo-5alpha-steroid:(acceptor) delta4-oxidoreductase	3-Oxo-5alpha-steroid:(acceptor) delta4-oxidoreductase	5alpha-Androstane-3,17-dione + Acceptor <=> Androstenedione + Reduced acceptor	C00674 + C00028 <=> C00280 + C00030	KEGG	1.3.99.5	1.3.99.5
R01835	5beta-androstane-3,17-dione:NADP+ 4,5-oxidoreductase	5beta-androstane-3,17-dione:NADP+ 4,5-oxidoreductase	5beta-Androstane-3,17-dione + NADP+ <=> H+ + NADPH + Androstenedione	C03772 + C00006 <=> C00080 + C00005 + C00280	KEGG	1.3.1.3	1.3.1.3
R01836	Testosterone:NAD+ 17-oxidoreductase	Testosterone:NAD+ 17-oxidoreductase	Testosterone + NAD+ <=> Androstenedione + NADH + H+	C00535 + C00003 <=> C00280 + C00004 + C00080	KEGG	1.1.1.51，1.1.1.63，1.1.1.239	1.1.1.51
R01837	3beta-Hydroxyandrost-5-en-17-one:NAD+ 3-oxidoreductase/delta5-delta-4 isomerase	3beta-Hydroxyandrost-5-en-17-one:NAD+ 3-oxidoreductase/delta5-delta-4 isomerase	Dehydroepiandrosterone + NAD+ <=> Androstenedione + NADH + H+	C01227 + C00003 <=> C00280 + C00004 + C00080	KEGG	1.1.1.145，5.3.3.1	1.1.1.145
R01838	Testosterone:NADP+ 17-oxidoreductase	Testosterone:NADP+ 17-oxidoreductase	Testosterone + NADP+ <=> Androstenedione + NADPH + H+	C00535 + C00006 <=> C00280 + C00005 + C00080	KEGG	1.1.1.51，1.1.1.64	1.1.1.51
R01840	Aromatase	Aromatase	Androstenedione + Reduced flavoprotein + Oxygen <=> 19-Hydroxyandrost-4-ene-3,17-dione + Oxidized flavoprotein + H2O	C00280 + C03024 + C00007 <=> C05290 + C03161 + C00001	KEGG	1.14.14.1	1.14.14.1
R01841	17alpha-Hydroxyprogesterone acetaldehyde-lyase	17alpha-Hydroxyprogesterone acetaldehyde-lyase	17alpha-Hydroxyprogesterone <=> Androstenedione + Acetaldehyde	C01176 <=> C00280 + C00084	KEGG	4.1.2.30	4.1.2.30
R01842	Androstenedione 7alpha-hydroxylase	Androstenedione 7alpha-hydroxylase	Androstenedione + Reduced flavoprotein + Oxygen <=> 7alpha-Hydroxyandrost-4-ene-3,17-dione + Oxidized flavoprotein + H2O	C00280 + C03024 + C00007 <=> C05296 + C03161 + C00001	KEGG	1.14.14.1	1.14.14.1
R01843	ATP:Sedoheptulose 7-phosphate 1-phosphotransferase	ATP:Sedoheptulose 7-phosphate 1-phosphotransferase	ATP + Sedoheptulose 7-phosphate <=> ADP + Sedoheptulose 1,7-bisphosphate	C00002 + C05382 <=> C00008 + C00447	KEGG	2.7.1.11	2.7.1.11
R01844	ATP:sedoheptulose 7-phosphate	ATP:sedoheptulose 7-phosphate	ATP + Sedoheptulose <=> ADP + Sedoheptulose 7-phosphate	C00002 + C02076 <=> C00008 + C05382	KEGG	2.7.1.14	2.7.1.14
R01845	Sedoheptulose 1,7-bisphosphate 1-phosphohydrolase	Sedoheptulose 1,7-bisphosphate 1-phosphohydrolase	Sedoheptulose 1,7-bisphosphate + H2O <=> Sedoheptulose 7-phosphate + Orthophosphate	C00447 + C00001 <=> C05382 + C00009	KEGG	3.1.3.11，3.1.3.37	3.1.3.11
R01850	acetyl-CoA:hydrogen-sulfide S-acetyltransferase	acetyl-CoA:hydrogen-sulfide S-acetyltransferase	Acetyl-CoA + Hydrogen sulfide <=> CoA + Thioacetate	C00024 + C00283 <=> C00010 + C01857	KEGG	2.3.1.10	2.3.1.10
R01851	Methanethiol:oxygen oxidoreductase	Methanethiol:oxygen oxidoreductase	Methanethiol + Oxygen + H2O <=> Hydrogen sulfide + Formaldehyde + Hydrogen peroxide	C00409 + C00007 + C00001 <=> C00283 + C00067 + C00027	KEGG	1.8.3.4	1.8.3.4
R01853	RCH2NH2:oxygen oxidoreductase(deaminating)(flavin-containing); RCH2NH2:oxygen oxidoreductase (deaminating) (copper-containing)	RCH2NH2:oxygen oxidoreductase(deaminating)(flavin-containing)	Primary amine + H2O + Oxygen <=> Aldehyde + NH3 + Hydrogen peroxide	C00375 + C00001 + C00007 <=> C00071 + C00014 + C00027	KEGG	1.4.3.4，1.4.3.21	1.4.3.4
R01854	RCH2NH2:acceptor oxidoreductase (deaminating); aralkylamine:acceptor oxidoreductase (deaminating)	RCH2NH2:acceptor oxidoreductase (deaminating)	Primary amine + H2O + Acceptor <=> Aldehyde + NH3 + Reduced acceptor	C00375 + C00001 + C00028 <=> C00071 + C00014 + C00030	KEGG	1.4.99.3，1.4.99.4	1.4.99.3
R01855	2'-Deoxyguanosine 5'-triphosphate diphosphohydrolase	2'-Deoxyguanosine 5'-triphosphate diphosphohydrolase	dGTP + H2O <=> dGMP + Diphosphate	C00286 + C00001 <=> C00362 + C00013	KEGG	3.6.1.19	3.6.1.19
R01856	dGTP triphosphohydrolase	dGTP triphosphohydrolase	dGTP + H2O <=> Deoxyguanosine + Triphosphate	C00286 + C00001 <=> C00330 + C00536	KEGG	3.1.5.1	3.1.5.1
R01857	ATP:dGDP phosphotransferase	ATP:dGDP phosphotransferase	ATP + dGDP <=> ADP + dGTP	C00002 + C00361 <=> C00008 + C00286	KEGG	2.7.4.6	2.7.4.6
R01858	dGTP:pyruvate 2-O-phosphotransferase	dGTP:pyruvate 2-O-phosphotransferase	dGTP + Pyruvate <=> dGDP + Phosphoenolpyruvate	C00286 + C00022 <=> C00361 + C00074	KEGG	2.7.1.40	2.7.1.40
R01859	Propanoyl-CoA:carbon-dioxide ligase (ADP-forming)	Propanoyl-CoA:carbon-dioxide ligase (ADP-forming)	ATP + Propanoyl-CoA + HCO3- <=> ADP + Orthophosphate + (S)-Methylmalonyl-CoA	C00002 + C00100 + C00288 <=> C00008 + C00009 + C00683	KEGG	6.4.1.3	6.4.1.3
R01860	4-Aminobenzoate carboxy-lyase	4-Aminobenzoate carboxy-lyase	4-Aminobenzoate <=> Aniline + CO2	C00568 <=> C00292 + C00011	KEGG	4.1.1.24	4.1.1.24
R01861	3'-Phosphoadenylyl-sulfate:benzenamine N-sulfotransferase	3'-Phosphoadenylyl-sulfate:benzenamine N-sulfotransferase	3'-Phosphoadenylyl sulfate + Aniline <=> Adenosine 3',5'-bisphosphate + Benzenamine sulfate	C00053 + C00292 <=> C00054 + C06011	KEGG	2.8.2.3	2.8.2.3
R01862	Anilide amidohydrolase	Anilide amidohydrolase	Anilide + H2O <=> Carboxylate + Aniline	C01402 + C00001 <=> C00060 + C00292	KEGG	3.5.1.13	3.5.1.13
R01863	inosine:phosphate alpha-D-ribosyltransferase	inosine:phosphate alpha-D-ribosyltransferase	Inosine + Orthophosphate <=> Hypoxanthine + alpha-D-Ribose 1-phosphate	C00294 + C00009 <=> C00262 + C00620	KEGG	2.4.2.1，2.4.2.15	2.4.2.1
R01866	(S)-dihydroorotate:NADP+ oxidoreductase	(S)-dihydroorotate:NADP+ oxidoreductase	(S)-Dihydroorotate + NADP+ <=> Orotate + NADPH + H+	C00337 + C00006 <=> C00295 + C00005 + C00080	KEGG	1.3.1.15	1.3.1.15
R01867	(S)-Dihydroorotate:oxygen oxidoreductase	(S)-Dihydroorotate:oxygen oxidoreductase	(S)-Dihydroorotate + Oxygen <=> Orotate + Hydrogen peroxide	C00337 + C00007 <=> C00295 + C00027	KEGG	1.3.3.1	1.3.3.1
R01868	(S)-dihydroorotate:quinone oxidoreductase	(S)-dihydroorotate:quinone oxidoreductase	(S)-Dihydroorotate + Quinone <=> Orotate + Hydroquinone	C00337 + C15602 <=> C00295 + C15603	KEGG	1.3.5.2	1.3.5.2
R01869	(S)-dihydroorotate:NAD+ oxidoreductase	(S)-dihydroorotate:NAD+ oxidoreductase	(S)-Dihydroorotate + NAD+ <=> Orotate + H+ + NADH	C00337 + C00003 <=> C00295 + C00080 + C00004	KEGG	1.3.1.14	1.3.1.14
R01870	Orotidine-5'-phosphate:diphosphate phospho-alpha-D-ribosyl-transferase	Orotidine-5'-phosphate:diphosphate phospho-alpha-D-ribosyl-transferase	Orotidine 5'-phosphate + Diphosphate <=> Orotate + 5-Phospho-alpha-D-ribose 1-diphosphate	C01103 + C00013 <=> C00295 + C00119	KEGG	2.4.2.10	2.4.2.10
R01872	L-quinate:NAD+ 3-oxidoreductase; Quinate:NAD+ 5-oxidoreductase	L-quinate:NAD+ 3-oxidoreductase	Quinate + NAD+ <=> 3-Dehydroquinate + NADH + H+	C00296 + C00003 <=> C00944 + C00004 + C00080	KEGG	1.1.1.24，1.1.1.282	1.1.1.24
R01873	Quinate:pyrroloquinoline-quinone 3-oxidoreductase; Quinate:pyrroloquinoline-quinone 5-oxidoreductase	Quinate:pyrroloquinoline-quinone 3-oxidoreductase	Quinate + PQQ <=> PQQH2 + 3-Dehydroquinate	C00296 + C00113 <=> C01359 + C00944	KEGG	1.1.5.8	1.1.5.8
R01874	D-cysteine sulfide-lyase (deaminating; pyruvate-forming)	D-cysteine sulfide-lyase (deaminating; pyruvate-forming)	D-Cysteine + H2O <=> Hydrogen sulfide + NH3 + Pyruvate	C00793 + C00001 <=> C00283 + C00014 + C00022	KEGG	4.4.1.15	4.4.1.15
R01875	Thiosulfate:thiol sulfurtransferase	Thiosulfate:thiol sulfurtransferase	Thiosulfate + 2 Glutathione + H+ <=> Sulfite + Glutathione disulfide + Hydrogen sulfide	C00320 + 2 C00051 + C00080 <=> C00094 + C00127 + C00283	KEGG	2.8.1.3	2.8.1.3
R01876	Uridine:phosphate alpha-D-ribosyltransferase	Uridine:phosphate alpha-D-ribosyltransferase	Uridine + Orthophosphate <=> Uracil + alpha-D-Ribose 1-phosphate	C00299 + C00009 <=> C00106 + C00620	KEGG	2.4.2.3	2.4.2.3
R01877	Uridine 3'-monophosphate phosphohydrolase	Uridine 3'-monophosphate phosphohydrolase	3'-UMP + H2O <=> Uridine + Orthophosphate	C01368 + C00001 <=> C00299 + C00009	KEGG	3.1.3.6	3.1.3.6
R01878	Cytidine aminohydrolase	Cytidine aminohydrolase	Cytidine + H2O <=> Uridine + NH3	C00475 + C00001 <=> C00299 + C00014	KEGG	3.5.4.5	3.5.4.5
R01879	2-Deoxyuridine,2-oxoglutarate:oxygen oxidoreductase (2'-hydroxylating)	2-Deoxyuridine,2-oxoglutarate:oxygen oxidoreductase (2'-hydroxylating)	Deoxyuridine + 2-Oxoglutarate + Oxygen <=> Uridine + Succinate + CO2	C00526 + C00026 + C00007 <=> C00299 + C00042 + C00011	KEGG	1.14.11.3	1.14.11.3
R01880	dGTP:uridine 5'-phosphotransferase	dGTP:uridine 5'-phosphotransferase	dGTP + Uridine <=> dGDP + UMP	C00286 + C00299 <=> C00361 + C00105	KEGG	2.7.1.48	2.7.1.48
R01881	ATP:creatine N-phosphotransferase	ATP:creatine N-phosphotransferase	ATP + Creatine <=> ADP + Phosphocreatine	C00002 + C00300 <=> C00008 + C02305	KEGG	2.7.3.2	2.7.3.2
R01882	N-Phosphocreatine hydrolase	N-Phosphocreatine hydrolase	Phosphocreatine + H2O <=> Creatine + Orthophosphate	C02305 + C00001 <=> C00300 + C00009	KEGG	3.9.1.1	3.9.1.1
R01883	S-Adenosyl-L-methionine:guanidinoacetate N-methyltransferase	S-Adenosyl-L-methionine:guanidinoacetate N-methyltransferase	S-Adenosyl-L-methionine + Guanidinoacetate <=> S-Adenosyl-L-homocysteine + Creatine	C00019 + C00581 <=> C00021 + C00300	KEGG	2.1.1.2	2.1.1.2
R01884	Creatinine amidohydrolase	Creatinine amidohydrolase	Creatinine + H2O <=> Creatine	C00791 + C00001 <=> C00300	KEGG	3.5.2.10	3.5.2.10
R01885	NO NAME	NO NAME	ADP-ribose + H2O <=> alpha-D-Ribose 1-phosphate + AMP	C00301 + C00001 <=> C00620 + C00020	KEGG	3.6.1.21	3.6.1.21
R01886	Nomega-(ADP-D-ribosyl)-L-arginine ADP-ribosylhydrolase	Nomega-(ADP-D-ribosyl)-L-arginine ADP-ribosylhydrolase	N(omega)-(ADP-D-ribosyl)-L-arginine + H2O <=> L-Arginine + ADP-ribose	C01201 + C00001 <=> C00062 + C00301	KEGG	3.2.2.19	3.2.2.19
R01887	gamma-Amino-gamma-cyanobutanoate aminohydrolase	gamma-Amino-gamma-cyanobutanoate aminohydrolase	gamma-Amino-gamma-cyanobutanoate + 2 H2O <=> DL-Glutamate + NH3	C05715 + 2 C00001 <=> C00302 + C00014	KEGG	3.5.5.1	3.5.5.1
R01888	ATP:kanamycin 3'-O-phosphotransferase	ATP:kanamycin 3'-O-phosphotransferase	ATP + Kanamycin A <=> ADP + Kanamycin A 3'-phosphate	C00002 + C01822 <=> C00008 + C03281	KEGG	2.7.1.95	2.7.1.95
R01889	Acetyl-CoA:kanamycin-B N6'-acetyltransferase	Acetyl-CoA:kanamycin-B N6'-acetyltransferase	Acetyl-CoA + Kanamycin B <=> CoA + N6'-Acetylkanamycin-B	C00024 + C00825 <=> C00010 + C03154	KEGG	2.3.1.82	2.3.1.82
R01890	CTP:choline-phosphate cytidylyltransferase	CTP:choline-phosphate cytidylyltransferase	CTP + Choline phosphate <=> Diphosphate + CDP-choline	C00063 + C00588 <=> C00013 + C00307	KEGG	2.7.7.15	2.7.7.15
R01891	CDP-choline:N-acylsphingosine cholinephosphotransferase	CDP-choline:N-acylsphingosine cholinephosphotransferase	CDP-choline + N-Acylsphingosine <=> CMP + Sphingomyelin	C00307 + C00195 <=> C00055 + C00550	KEGG	2.7.8.3	2.7.8.3
R01892	Ribitol:ferricytochrome-c 2-oxidoreductase	Ribitol:ferricytochrome-c 2-oxidoreductase	Ribitol + 2 Ferricytochrome c <=> D-Ribulose + 2 Ferrocytochrome c + 2 H+	C00474 + 2 C00125 <=> C00309 + 2 C00126 + 2 C00080	KEGG	1.1.2.2	1.1.2.2
R01895	Ribitol:NAD+ 2-oxidoreductase	Ribitol:NAD+ 2-oxidoreductase	Ribitol + NAD+ <=> D-Ribulose + NADH + H+	C00474 + C00003 <=> C00309 + C00004 + C00080	KEGG	1.1.1.56	1.1.1.56
R01896	Xylitol:NAD+ 2-oxidoreductase (D-xylulose-forming)	Xylitol:NAD+ 2-oxidoreductase (D-xylulose-forming)	Xylitol + NAD+ <=> D-Xylulose + NADH + H+	C00379 + C00003 <=> C00310 + C00004 + C00080	KEGG	1.1.1.9	1.1.1.9
R01898	D-Lyxose aldose-ketose-isomerase	D-Lyxose aldose-ketose-isomerase	D-Xylulose <=> D-Lyxose	C00310 <=> C00476	KEGG	5.3.1.15	5.3.1.15
R01899	Isocitrate:NADP+ oxidoreductase	Isocitrate:NADP+ oxidoreductase	Isocitrate + NADP+ <=> Oxalosuccinate + NADPH + H+	C00311 + C00006 <=> C05379 + C00005 + C00080	KEGG	1.1.1.42	1.1.1.42
R01900	isocitrate hydro-lyase (cis-aconitate-forming)	isocitrate hydro-lyase (cis-aconitate-forming)	Isocitrate <=> cis-Aconitate + H2O	C00311 <=> C00417 + C00001	KEGG	4.2.1.3	4.2.1.3
R01901	ATP:L-xylulose 5-phosphotransferase	ATP:L-xylulose 5-phosphotransferase	ATP + L-Xylulose <=> ADP + L-Xylulose 5-phosphate	C00002 + C00312 <=> C00008 + C03291	KEGG	2.7.1.53	2.7.1.53
R01902	ATP:L-xylulose 1-phosphotransferase	ATP:L-xylulose 1-phosphotransferase	ATP + L-Xylulose <=> ADP + L-Xylulose 1-phosphate	C00002 + C00312 <=> C00008 + C06441	KEGG	2.7.1.5	2.7.1.5
R01903	L-arabinitol:NAD+ 4-oxidoreductase (L-xylulose-forming)	L-arabinitol:NAD+ 4-oxidoreductase (L-xylulose-forming)	L-Arabitol + NAD+ <=> L-Xylulose + NADH + H+	C00532 + C00003 <=> C00312 + C00004 + C00080	KEGG	1.1.1.12	1.1.1.12
R01904	Xylitol:NADP+ 4-oxidoreductase (L-xylulose-forming)	Xylitol:NADP+ 4-oxidoreductase (L-xylulose-forming)	Xylitol + NADP+ <=> L-Xylulose + NADPH + H+	C00379 + C00006 <=> C00312 + C00005 + C00080	KEGG	1.1.1.10	1.1.1.10
R01905	3-Dehydro-L-gulonate carboxy-lyase	3-Dehydro-L-gulonate carboxy-lyase	3-Dehydro-L-gulonate <=> L-Xylulose + CO2	C00618 <=> C00312 + C00011	KEGG	4.1.1.34	4.1.1.34
R01906	L-lyxose aldose-ketose-isomerase	L-lyxose aldose-ketose-isomerase	L-Xylulose <=> L-Lyxose	C00312 <=> C01508	KEGG	5.3.1.-	5.3.1.-
R01908	oxalyl-CoA carboxy-lyase (formyl-CoA-forming)	oxalyl-CoA carboxy-lyase (formyl-CoA-forming)	Oxalyl-CoA <=> Formyl-CoA + CO2	C00313 <=> C00798 + C00011	KEGG	4.1.1.8	4.1.1.8
R01909	ATP:pyridoxine 5'-phosphotransferase	ATP:pyridoxine 5'-phosphotransferase	ATP + Pyridoxine <=> ADP + Pyridoxine phosphate	C00002 + C00314 <=> C00008 + C00627	KEGG	2.7.1.35	2.7.1.35
R01910	Primary alcohol:(acceptor) oxidoreductase	Primary alcohol:(acceptor) oxidoreductase	Pyridoxine + Oxygen <=> Isopyridoxal + Hydrogen peroxide	C00314 + C00007 <=> C06051 + C00027	KEGG	1.1.99.9	1.1.99.9
R01911	pyridoxine-5'-phosphate phosphohydrolase	pyridoxine-5'-phosphate phosphohydrolase	Pyridoxine + Orthophosphate <=> Pyridoxine phosphate + H2O	C00314 + C00009 <=> C00627 + C00001	KEGG	3.1.3.74	3.1.3.74
R01912	UDP-glucose:pyridoxine 5'-O-beta-D-glucosyltransferase	UDP-glucose:pyridoxine 5'-O-beta-D-glucosyltransferase	UDP-glucose + Pyridoxine <=> UDP + 5'-O-beta-D-Glucosylpyridoxine	C00029 + C00314 <=> C00015 + C03996	KEGG	2.4.1.160	2.4.1.160
R01913	NO NAME	NO NAME	Pyridoxine <=> 1-Deoxy-D-xylulose + 4-Hydroxy-L-threonine	C00314 <=> C06257 + C06056	KEGG
R01914	Spermidine:(acceptor) oxidoreductase	Spermidine:(acceptor) oxidoreductase	Spermidine + Oxygen + H2O <=> 1,3-Diaminopropane + 4-Aminobutyraldehyde + Hydrogen peroxide	C00315 + C00007 + C00001 <=> C00986 + C00555 + C00027	KEGG	1.5.99.6	1.5.99.6
R01915	Spermidine:(acceptor) oxidoreductase	Spermidine:(acceptor) oxidoreductase	Spermidine + Acceptor + H2O <=> 1,3-Diaminopropane + 4-Aminobutyraldehyde + Reduced acceptor	C00315 + C00028 + C00001 <=> C00986 + C00555 + C00030	KEGG	1.5.99.6	1.5.99.6
R01917	gamma-L-glutamyl-L-cysteinyl-glycine:spermidine ligase (ADP-forming)	gamma-L-glutamyl-L-cysteinyl-glycine:spermidine ligase (ADP-forming)	ATP + Glutathione + Spermidine <=> ADP + Orthophosphate + Glutathionylspermidine	C00002 + C00051 + C00315 <=> C00008 + C00009 + C05730	KEGG	6.3.1.8，6.3.1.9	6.3.1.8
R01918	gamma-L-glutamyl-L-cysteinyl-glycine:spermidine amidase	gamma-L-glutamyl-L-cysteinyl-glycine:spermidine amidase	Glutathionylspermidine + H2O <=> Glutathione + Spermidine	C05730 + C00001 <=> C00051 + C00315	KEGG	3.5.1.78，3.5.1.-	3.5.1.78
R01919	Spermidine:putrescine 4-aminobutyltransferase (propane-1,3-diamine-forming)	Spermidine:putrescine 4-aminobutyltransferase (propane-1,3-diamine-forming)	Putrescine + Spermidine <=> Homospermidine + 1,3-Diaminopropane	C00134 + C00315 <=> C06366 + C00986	KEGG	2.5.1.44，2.5.1.45	2.5.1.44
R01920	S-adenosylmethioninamine:putrescine 3-aminopropyltransferase	S-adenosylmethioninamine:putrescine 3-aminopropyltransferase	S-Adenosylmethioninamine + Putrescine <=> 5'-Methylthioadenosine + Spermidine	C01137 + C00134 <=> C00170 + C00315	KEGG	2.5.1.16	2.5.1.16
R01921	(S)-Carnitine:NAD+ oxidoreductase	(S)-Carnitine:NAD+ oxidoreductase	(S)-Carnitine + NAD+ <=> 3-Dehydrocarnitine + NADH + H+	C15025 + C00003 <=> C02636 + C00004 + C00080	KEGG	1.1.1.254	1.1.1.254
R01922	L-Carnitinamide amidohydrolase	L-Carnitinamide amidohydrolase	L-Carnitinamide + H2O <=> L-Carnitine + NH3 + H+	C02290 + C00001 <=> C00318 + C00014 + C00080	KEGG	3.5.1.73	3.5.1.73
R01923	Palmitoyl-CoA:L-carnitine O-palmitoyltransferase	Palmitoyl-CoA:L-carnitine O-palmitoyltransferase	Palmitoyl-CoA + L-Carnitine <=> CoA + L-Palmitoylcarnitine	C00154 + C00318 <=> C00010 + C02990	KEGG	2.3.1.21	2.3.1.21
R01924	O-Acylcarnitine acylhydrolase	O-Acylcarnitine acylhydrolase	O-Acylcarnitine + H2O <=> Fatty acid + L-Carnitine	C02301 + C00001 <=> C00162 + C00318	KEGG	3.1.1.28	3.1.1.28
R01925	L-carnitine hydro-lyase [4-(trimethylammonio)but-2-enoate-forming]	L-carnitine hydro-lyase [4-(trimethylammonio)but-2-enoate-forming]	L-Carnitine <=> 4-(Trimethylammonio)but-2-enoate + H2O	C00318 <=> C04114 + C00001	KEGG	4.2.1.89	4.2.1.89
R01926	ATP:sphingosine 1-phosphotransferase; sphingosine kinase	sphingosine kinase	Sphingosine + ATP <=> Sphingosine 1-phosphate + ADP	C00319 + C00002 <=> C06124 + C00008	KEGG	2.7.1.91	2.7.1.91
R01928	UDP-galactose:sphingosine 1-beta-galactosyltransferase	UDP-galactose:sphingosine 1-beta-galactosyltransferase	UDP-D-galactose + Sphingosine <=> UDP + Psychosine	C00052 + C00319 <=> C00015 + C01747	KEGG	2.4.1.23	2.4.1.23
R01929	CDP-choline:sphingosine cholinephosphotransferase	CDP-choline:sphingosine cholinephosphotransferase	CDP-choline + Sphingosine <=> CMP + Sphingosyl-phosphocholine	C00307 + C00319 <=> C00055 + C03640	KEGG	2.7.8.10	2.7.8.10
R01930	Trithionate thiosulfohydrolase	Trithionate thiosulfohydrolase	Trithionate + H2O <=> Thiosulfate + Sulfate	C01861 + C00001 <=> C00320 + C00059	KEGG	3.12.1.1	3.12.1.1
R01931	thiosulfate:cyanide sulfurtranserase	thiosulfate:cyanide sulfurtranserase	Thiosulfate + Cyanide <=> Sulfite + Thiocyanate	C00320 + C00177 <=> C00094 + C01755	KEGG	2.8.1.1	2.8.1.1
R01932	2-hydroxyadipate:NAD+ 2-oxidoreductase	2-hydroxyadipate:NAD+ 2-oxidoreductase	2-Oxoadipate + NADH + H+ <=> 2-Hydroxyadipate + NAD+	C00322 + C00004 + C00080 <=> C02360 + C00003	KEGG	1.1.1.172	1.1.1.172
R01933	2-oxoadipate dehydrogenase complex	2-oxoadipate dehydrogenase complex	2-Oxoadipate + CoA + NAD+ <=> Glutaryl-CoA + CO2 + NADH + H+	C00322 + C00010 + C00003 <=> C00527 + C00011 + C00004 + C00080	KEGG	1.2.4.2，1.8.1.4，2.3.1.61	1.2.4.2
R01934	(1R,2S)-1-hydroxybutane-1,2,4-tricarboxylate:NAD+ oxidoreductase (decarboxylating)	(1R,2S)-1-hydroxybutane-1,2,4-tricarboxylate:NAD+ oxidoreductase (decarboxylating)	Homoisocitrate + NAD+ <=> 2-Oxoadipate + CO2 + NADH + H+	C05662 + C00003 <=> C00322 + C00011 + C00004 + C00080	KEGG	1.1.1.87，1.1.1.286	1.1.1.87
R01936	(1R,2S)-1-hydroxybutane-1,2,4-tricarboxylate:NAD+ oxidoreductase (decarboxylating)	(1R,2S)-1-hydroxybutane-1,2,4-tricarboxylate:NAD+ oxidoreductase (decarboxylating)	Oxaloglutarate <=> 2-Oxoadipate + CO2	C05533 <=> C00322 + C00011	KEGG	1.1.1.87	1.1.1.87
R01937	NO NAME	NO NAME	2-Oxoadipate + NH3 + NAD+ <=> 2-Aminomuconate + NADH + H+ + H2O	C00322 + C00014 + C00003 <=> C02220 + C00004 + C00080 + C00001	KEGG	1.5.1.-	1.5.1.-
R01938	NO NAME	NO NAME	2-Oxoadipate + NH3 + NADP+ <=> 2-Aminomuconate + NADPH + H+ + H2O	C00322 + C00014 + C00006 <=> C02220 + C00005 + C00080 + C00001	KEGG	1.5.1.-	1.5.1.-
R01939	L-2-aminoadipate:2-oxoglutarate aminotransferase	L-2-aminoadipate:2-oxoglutarate aminotransferase	L-2-Aminoadipate + 2-Oxoglutarate <=> 2-Oxoadipate + L-Glutamate	C00956 + C00026 <=> C00322 + C00025	KEGG	2.6.1.39	2.6.1.39
R01940	2-Oxoadipate:lipoamde 2-oxidoreductase(decarboxylating and acceptor-succinylating)	2-Oxoadipate:lipoamde 2-oxidoreductase(decarboxylating and acceptor-succinylating)	2-Oxoadipate + Enzyme N6-(lipoyl)lysine <=> [Dihydrolipoyllysine-residue succinyltransferase] S-glutaryldihydrolipoyllysine + CO2	C00322 + C15972 <=> C06157 + C00011	KEGG	1.2.4.2	1.2.4.2
R01941	Caffeic aldehyde:NADP+ oxidoreductase (CoA-caffeoylating)	Caffeic aldehyde:NADP+ oxidoreductase (CoA-caffeoylating)	Caffeic aldehyde + CoA + NADP+ <=> Caffeoyl-CoA + NADPH + H+	C10945 + C00010 + C00006 <=> C00323 + C00005 + C00080	KEGG	1.2.1.44	1.2.1.44
R01942	S-Adenosyl-L-methionine:caffeoyl-CoA 3-O-methyltransferase	S-Adenosyl-L-methionine:caffeoyl-CoA 3-O-methyltransferase	S-Adenosyl-L-methionine + Caffeoyl-CoA <=> S-Adenosyl-L-homocysteine + Feruloyl-CoA	C00019 + C00323 <=> C00021 + C00406	KEGG	2.1.1.104	2.1.1.104
R01943	Caffeate:CoA ligase (AMP-forming); 3,4-Dihydroxy-trans-cinnamate:CoA ligase (AMP-forming)	Caffeate:CoA ligase (AMP-forming)	ATP + Caffeate + CoA <=> AMP + Diphosphate + Caffeoyl-CoA	C00002 + C01197 + C00010 <=> C00020 + C00013 + C00323	KEGG	6.2.1.12	6.2.1.12
R01944	Caffeoyl-CoA:putrescine N-(3,4-dihydroxycinnamoyl)transferase	Caffeoyl-CoA:putrescine N-(3,4-dihydroxycinnamoyl)transferase	Caffeoyl-CoA + Putrescine <=> CoA + N-Caffeoylputrescine	C00323 + C00134 <=> C00010 + C03002	KEGG	2.3.1.138	2.3.1.138
R01945	Caffeoyl-CoA:quinate O-(3,4-dihydroxycinnamoyl)transferase	Caffeoyl-CoA:quinate O-(3,4-dihydroxycinnamoyl)transferase	Caffeoyl-CoA + Quinate <=> CoA + Chlorogenate	C00323 + C00296 <=> C00010 + C00852	KEGG	2.3.1.99，2.3.1.133	2.3.1.99
R01946	Caffeoyl-CoA:isocitrate 3-O-(3,4-dihydroxycinnamoyl)transferase	Caffeoyl-CoA:isocitrate 3-O-(3,4-dihydroxycinnamoyl)transferase	Caffeoyl-CoA + Isocitrate <=> CoA + 2-Caffeoylisocitrate	C00323 + C00311 <=> C00010 + C02927	KEGG	2.3.1.126	2.3.1.126
R01951	GTP:beta-L-fucose-1-phosphate guanylyltransferase	GTP:beta-L-fucose-1-phosphate guanylyltransferase	GTP + L-Fucose 1-phosphate <=> Diphosphate + GDP-L-fucose	C00044 + C02985 <=> C00013 + C00325	KEGG	2.7.7.30	2.7.7.30
R01952	Palmitoyl-CoA:glycoprotein N-palmitoyltransferase	Palmitoyl-CoA:glycoprotein N-palmitoyltransferase	Palmitoyl-CoA + Glycoprotein <=> CoA + N-Palmitoylglycoprotein	C00154 + C00326 <=> C00010 + C03412	KEGG	2.3.1.96	2.3.1.96
R01954	L-Citrulline:L-aspartate ligase (AMP-forming)	L-Citrulline:L-aspartate ligase (AMP-forming)	ATP + L-Citrulline + L-Aspartate <=> AMP + Diphosphate + N-(L-Arginino)succinate	C00002 + C00327 + C00049 <=> C00020 + C00013 + C03406	KEGG	6.3.4.5	6.3.4.5
R01956	L-Kynurenine:2-oxoglutarate aminotransferase	L-Kynurenine:2-oxoglutarate aminotransferase	L-Kynurenine + 2-Oxoglutarate <=> 4-(2-Aminophenyl)-2,4-dioxobutanoate + L-Glutamate	C00328 + C00026 <=> C01252 + C00025	KEGG	2.6.1.7	2.6.1.7
R01957	L-Kynurenine:glyoxylote aminotransferase (cyclizing)	L-Kynurenine:glyoxylote aminotransferase (cyclizing)	L-Kynurenine + Glyoxylate <=> 4-(2-Aminophenyl)-2,4-dioxobutanoate + Glycine	C00328 + C00048 <=> C01252 + C00037	KEGG	2.6.1.63	2.6.1.63
R01959	N-Formyl-L-kynurenine amidohydrolase	N-Formyl-L-kynurenine amidohydrolase	L-Formylkynurenine + H2O <=> Formate + L-Kynurenine	C02700 + C00001 <=> C00058 + C00328	KEGG	3.5.1.9	3.5.1.9
R01960	L-Kynurenine,NADPH:oxygen oxidoreductase (3-hydroxylating)	L-Kynurenine,NADPH:oxygen oxidoreductase (3-hydroxylating)	L-Kynurenine + Oxygen + NADPH + H+ <=> 3-Hydroxy-L-kynurenine + NADP+ + H2O	C00328 + C00007 + C00005 + C00080 <=> C03227 + C00006 + C00001	KEGG	1.14.13.9	1.14.13.9
R01961	ATP:D-glucosamine 6-phosphotransferase	ATP:D-glucosamine 6-phosphotransferase	ATP + D-Glucosamine <=> ADP + D-Glucosamine 6-phosphate	C00002 + C00329 <=> C00008 + C00352	KEGG	2.7.1.1，2.7.1.8	2.7.1.1
R01962	D-glucosamine:oxygen 1-oxidoreductase	D-glucosamine:oxygen 1-oxidoreductase	D-Glucosamine + Oxygen + H2O <=> 2-Amino-2-deoxy-D-gluconate + Hydrogen peroxide	C00329 + C00007 + C00001 <=> C03752 + C00027	KEGG	1.1.3.-	1.1.3.-
R01963	N-Sulfo-D-glucosamine sulfohydrolase	N-Sulfo-D-glucosamine sulfohydrolase	N-Sulfo-D-glucosamine + H2O <=> D-Glucosamine + Sulfate	C01075 + C00001 <=> C00329 + C00059	KEGG	3.10.1.1	3.10.1.1
R01964	ITP:D-glucosamine 6-phosphotransferase	ITP:D-glucosamine 6-phosphotransferase	ITP + D-Glucosamine <=> IDP + D-Glucosamine 6-phosphate	C00081 + C00329 <=> C00104 + C00352	KEGG	2.7.1.1	2.7.1.1
R01965	dATP:D-glucosamine 6-phosphotransferase	dATP:D-glucosamine 6-phosphotransferase	dATP + D-Glucosamine <=> dADP + D-Glucosamine 6-phosphate	C00131 + C00329 <=> C00206 + C00352	KEGG	2.7.1.1	2.7.1.1
R01966	beta-D-glucosaminide glucosaminohydrolase	beta-D-glucosaminide glucosaminohydrolase	D-Glucosamine + D-Glucosaminide <=> D-Glucosaminide + H2O	C00329 + C06023 <=> C06023 + C00001	KEGG	3.2.1.165	3.2.1.165
R01967	ATP:deoxyguanosine 5'-phosphotransferase	ATP:deoxyguanosine 5'-phosphotransferase	ATP + Deoxyguanosine <=> ADP + dGMP	C00002 + C00330 <=> C00008 + C00362	KEGG	2.7.1.113	2.7.1.113
R01968	2'-Deoxyguanosine 5'-monophosphate phosphohydrolase	2'-Deoxyguanosine 5'-monophosphate phosphohydrolase	dGMP + H2O <=> Deoxyguanosine + Orthophosphate	C00362 + C00001 <=> C00330 + C00009	KEGG	3.1.3.5	3.1.3.5
R01969	Deoxyguanosine:orthophosphate ribosyltransferase	Deoxyguanosine:orthophosphate ribosyltransferase	Deoxyguanosine + Orthophosphate <=> Guanine + 2-Deoxy-D-ribose 1-phosphate	C00330 + C00009 <=> C00242 + C00672	KEGG	2.4.2.1，2.4.2.4	2.4.2.1
R01971	Indolelactate:NAD+ oxidoreductase	Indolelactate:NAD+ oxidoreductase	Indolelactate + NAD+ <=> Indolepyruvate + NADH + H+	C02043 + C00003 <=> C00331 + C00004 + C00080	KEGG	1.1.1.110	1.1.1.110
R01972	S-Adenosyl-L-methionine:indolepyruvate C-methyltransferase	S-Adenosyl-L-methionine:indolepyruvate C-methyltransferase	S-Adenosyl-L-methionine + Indolepyruvate <=> S-Adenosyl-L-homocysteine + (S)-beta-Methylindolepyruvate	C00019 + C00331 <=> C00021 + C03914	KEGG	2.1.1.47	2.1.1.47
R01973	S-Adenosyl-L-methionine:(indol-3-yl)pyruvate C-methyltransferase	S-Adenosyl-L-methionine:(indol-3-yl)pyruvate C-methyltransferase	S-Adenosyl-L-methionine + Indolepyruvate <=> S-Adenosyl-L-homocysteine + 3-Methylindolepyruvate	C00019 + C00331 <=> C00021 + C05644	KEGG	2.1.1.47	2.1.1.47
R01974	3-(indol-3-yl)pyruvate carboxy-lyase [(2-indol-3-yl)acetaldehyde-forming]	3-(indol-3-yl)pyruvate carboxy-lyase [(2-indol-3-yl)acetaldehyde-forming]	Indolepyruvate <=> Indole-3-acetaldehyde + CO2	C00331 <=> C00637 + C00011	KEGG	4.1.1.43，4.1.1.74	4.1.1.43
R01975	(S)-3-Hydroxybutanoyl-CoA:NAD+ oxidoreductase	(S)-3-Hydroxybutanoyl-CoA:NAD+ oxidoreductase	(S)-3-Hydroxybutanoyl-CoA + NAD+ <=> Acetoacetyl-CoA + NADH + H+	C01144 + C00003 <=> C00332 + C00004 + C00080	KEGG	1.1.1.35	1.1.1.35
R01976	(S)-3-Hydroxybutanoyl-CoA:NADP+ oxidoreductase	(S)-3-Hydroxybutanoyl-CoA:NADP+ oxidoreductase	(S)-3-Hydroxybutanoyl-CoA + NADP+ <=> Acetoacetyl-CoA + NADPH + H+	C01144 + C00006 <=> C00332 + C00005 + C00080	KEGG	1.1.1.157	1.1.1.157
R01977	(R)-3-Hydroxybutanoyl-CoA:NADP+ oxidoreductase	(R)-3-Hydroxybutanoyl-CoA:NADP+ oxidoreductase	(R)-3-Hydroxybutanoyl-CoA + NADP+ <=> Acetoacetyl-CoA + NADPH + H+	C03561 + C00006 <=> C00332 + C00005 + C00080	KEGG	1.1.1.36	1.1.1.36
R01978	acetyl-CoA:acetoacetyl-CoA C-acetyltransferase (thioester-hydrolysing, carboxymethyl-forming)	acetyl-CoA:acetoacetyl-CoA C-acetyltransferase (thioester-hydrolysing, carboxymethyl-forming)	(S)-3-Hydroxy-3-methylglutaryl-CoA + CoA <=> Acetyl-CoA + H2O + Acetoacetyl-CoA	C00356 + C00010 <=> C00024 + C00001 + C00332	KEGG	2.3.3.10	2.3.3.10
R01980	ATP:D-galacturonate 1-phosphotransferase	ATP:D-galacturonate 1-phosphotransferase	ATP + D-Galacturonate <=> ADP + 1-Phospho-alpha-D-galacturonate	C00002 + C00333 <=> C00008 + C04037	KEGG	2.7.1.44	2.7.1.44
R01981	uronate:NAD+ 1-oxidoreductase; D-galacturonate:NAD+ 1-oxidoreductase	uronate:NAD+ 1-oxidoreductase	D-Galacturonate + NAD+ + H2O <=> D-Galactarate + NADH + H+	C00333 + C00003 + C00001 <=> C00879 + C00004 + C00080	KEGG	1.1.1.203	1.1.1.203
R01982	Poly(1,4-alpha-D-galacturonate) galacturonohydrolase	Poly(1,4-alpha-D-galacturonate) galacturonohydrolase	Pectate + H2O <=> D-Galacturonate + Pectate	C00470 + C00001 <=> C00333 + C00470	KEGG	3.2.1.15，3.2.1.67	3.2.1.15
R01983	D-Galacturonate aldose-ketose-isomerase	D-Galacturonate aldose-ketose-isomerase	D-Galacturonate <=> D-Tagaturonate	C00333 <=> C00558	KEGG	5.3.1.12	5.3.1.12
R01984	NO NAME	NO NAME	D-Galacturonate <=> D-Galacturonolactone + H2O	C00333 <=> C06430 + C00001	KEGG
R01986	4-Aminobutyraldehyde:NAD+ oxidoreductase	4-Aminobutyraldehyde:NAD+ oxidoreductase	4-Aminobutyraldehyde + NADP+ + H2O <=> 4-Aminobutanoate + NADPH + H+	C00555 + C00006 + C00001 <=> C00334 + C00005 + C00080	KEGG	1.2.1.3	1.2.1.3
R01987	4-acetamidobutanoate amidohydrolase	4-acetamidobutanoate amidohydrolase	4-Aminobutanoate + Acetate <=> 4-Acetamidobutanoate + H2O	C00334 + C00033 <=> C02946 + C00001	KEGG	3.5.1.63	3.5.1.63
R01989	L-Arginine:4-aminobutanoate amidinotransferase	L-Arginine:4-aminobutanoate amidinotransferase	L-Arginine + 4-Aminobutanoate <=> L-Ornithine + 4-Guanidinobutanoate	C00062 + C00334 <=> C00077 + C01035	KEGG	2.1.4.1	2.1.4.1
R01990	4-Guanidinobutanoate amidinohydrolase	4-Guanidinobutanoate amidinohydrolase	4-Guanidinobutanoate + H2O <=> 4-Aminobutanoate + Urea	C01035 + C00001 <=> C00334 + C00086	KEGG	3.5.3.7	3.5.3.7
R01991	L-histidine:4-aminobutanoate ligase (AMP-forming)	L-histidine:4-aminobutanoate ligase (AMP-forming)	ATP + L-Histidine + 4-Aminobutanoate <=> AMP + Diphosphate + Homocarnosine	C00002 + C00135 + C00334 <=> C00020 + C00013 + C00884	KEGG	6.3.2.11	6.3.2.11
R01992	alpha-Aminobutyryl histidine hydrolase	alpha-Aminobutyryl histidine hydrolase	Homocarnosine + H2O <=> 4-Aminobutanoate + L-Histidine	C00884 + C00001 <=> C00334 + C00135	KEGG	3.4.13.3	3.4.13.3
R01993	(S)-dihydroorotate amidohydrolase	(S)-dihydroorotate amidohydrolase	(S)-Dihydroorotate + H2O <=> N-Carbamoyl-L-aspartate	C00337 + C00001 <=> C00438	KEGG	3.5.2.3	3.5.2.3
R01994	UDPglucose:lipopolysaccharide glucosyltransferase	UDPglucose:lipopolysaccharide glucosyltransferase	UDP-glucose + Lipopolysaccharide <=> UDP + D-Glucosyllipopolysaccharide	C00029 + C00338 <=> C00015 + C03859	KEGG	2.4.1.58，2.4.1.-	2.4.1.58
R01995	UDPglucose:arylamine N-D-glucosyltransferase	UDPglucose:arylamine N-D-glucosyltransferase	UDP-glucose + Lipopolysaccharide <=> UDP + alpha-D-Glucosyllipopolysaccharide	C00029 + C00338 <=> C00015 + C04266	KEGG	2.4.1.73	2.4.1.73
R01996	UDP-N-acetyl-D-glucosamine:lipopolysaccharide N-acetylglucosaminyltransferase	UDP-N-acetyl-D-glucosamine:lipopolysaccharide N-acetylglucosaminyltransferase	UDP-N-acetyl-D-glucosamine + Lipopolysaccharide <=> UDP + N-Acetyl-D-glucosaminyllipopolysaccharide	C00043 + C00338 <=> C00015 + C04539	KEGG	2.4.1.56	2.4.1.56
R01997	UDPgalactose:lipopolysaccharide 3-alpha-D-galactosyltransferase	UDPgalactose:lipopolysaccharide 3-alpha-D-galactosyltransferase	UDP-D-galactose + Lipopolysaccharide <=> UDP + 3-alpha-D-Galactosyl-[lipopolysaccharide glucose]	C00052 + C00338 <=> C00015 + C04473	KEGG	2.4.1.44	2.4.1.44
R01998	long-chain-alcohol:NAD+ oxidoreductase	long-chain-alcohol:NAD+ oxidoreductase	Long-chain alcohol + H2O + 2 NAD+ <=> Long-chain carboxylate + 2 NADH + 2 H+	C00339 + C00001 + 2 C00003 <=> C00347 + 2 C00004 + 2 C00080	KEGG	1.1.1.192	1.1.1.192
R01999	Acyl-CoA:long-chain-alcohol O-acyltransferase	Acyl-CoA:long-chain-alcohol O-acyltransferase	Acyl-CoA + Long-chain alcohol <=> CoA + Long-chain ester	C00040 + C00339 <=> C00010 + C02434	KEGG	2.3.1.75	2.3.1.75
R02000	rubredoxin:NAD+ oxidoreductase	rubredoxin:NAD+ oxidoreductase	Reduced rubredoxin + NAD+ <=> Oxidized rubredoxin + NADH + H+	C00340 + C00003 <=> C00435 + C00004 + C00080	KEGG	1.18.1.1，1.18.1.3，1.18.1.4	1.18.1.1
R02002	Reduced rubredoxin:NADP+ oxidoreductase	Reduced rubredoxin:NADP+ oxidoreductase	Reduced rubredoxin + NADP+ <=> Oxidized rubredoxin + NADPH + H+	C00340 + C00006 <=> C00435 + C00005 + C00080	KEGG	1.18.1.4	1.18.1.4
R02003	Geranyl-diphosphate:isopentenyl-diphosphate geranyltrans-transferase	Geranyl-diphosphate:isopentenyl-diphosphate geranyltrans-transferase	Geranyl diphosphate + Isopentenyl diphosphate <=> Diphosphate + trans,trans-Farnesyl diphosphate	C00341 + C00129 <=> C00013 + C00448	KEGG	2.5.1.10	2.5.1.10
R02004	geranyl-diphosphate diphosphate-lyase [cyclizing, (-)-endo-fenchol-forming]	geranyl-diphosphate diphosphate-lyase [cyclizing, (-)-endo-fenchol-forming]	Geranyl diphosphate + H2O <=> Fenchyl alcohol + Diphosphate	C00341 + C00001 <=> C02344 + C00013	KEGG	4.2.3.10	4.2.3.10
R02006	Geranyl-diphosphate diphosphate-lyase (cyclizing, sabinene-hydrate-forming)	Geranyl-diphosphate diphosphate-lyase (cyclizing, sabinene-hydrate-forming)	Geranyl diphosphate + H2O <=> Sabinene hydrate + Diphosphate	C00341 + C00001 <=> C02462 + C00013	KEGG	4.2.3.11	4.2.3.11
R02007	(+)-Bornyl-diphosphate lyase (decyclizing)	(+)-Bornyl-diphosphate lyase (decyclizing)	(+)-Bornyl-diphosphate <=> Geranyl diphosphate	C03190 <=> C00341	KEGG	5.5.1.8	5.5.1.8
R02008	NO NAME	NO NAME	10-Oxogeranial <=> Iridodial	C17622 <=> C06069	KEGG
R02009	geranyldiphosphate diphosphate-lyase (myrcene-forming)	geranyldiphosphate diphosphate-lyase (myrcene-forming)	Geranyl diphosphate <=> Myrcene + Diphosphate	C00341 <=> C06074 + C00013	KEGG	4.2.3.15	4.2.3.15
R02010	geranyl-diphosphate diphosphate-lyase (cyclizing, terpinolene-forming)	geranyl-diphosphate diphosphate-lyase (cyclizing, terpinolene-forming)	Geranyl diphosphate <=> Terpinolene + Diphosphate	C00341 <=> C06075 + C00013	KEGG	4.2.3.-	4.2.3.-
R02011	geranyl-diphosphate diphosphate-lyase (cyclizing, Comphene-forming)	geranyl-diphosphate diphosphate-lyase (cyclizing, Comphene-forming)	Geranyl diphosphate <=> Comphene + Diphosphate	C00341 <=> C06076 + C00013	KEGG	4.2.3.-	4.2.3.-
R02012	geranyldiphosphate diphosphate lyase (pinene forming)	geranyldiphosphate diphosphate lyase (pinene forming)	Geranyl diphosphate <=> Pinene + Diphosphate	C00341 <=> C06077 + C00013	KEGG	4.2.3.14	4.2.3.14
R02013	geranyl-diphosphate diphosphate-lyase [cyclizing; (4S)-limonene-forming]	geranyl-diphosphate diphosphate-lyase [cyclizing; (4S)-limonene-forming]	Geranyl diphosphate <=> (-)-Limonene + Diphosphate	C00341 <=> C00521 + C00013	KEGG	4.2.3.16	4.2.3.16
R02014	2'-Deoxyadenosine 5'-triphosphate:oxydized-thioredoxin 2'-oxidoreductase	2'-Deoxyadenosine 5'-triphosphate:oxydized-thioredoxin 2'-oxidoreductase	dATP + Thioredoxin disulfide + H2O <=> ATP + Thioredoxin	C00131 + C00343 + C00001 <=> C00002 + C00342	KEGG	1.17.4.2	1.17.4.2
R02016	NADPH:oxidized-thioredoxin oxidoreductase	NADPH:oxidized-thioredoxin oxidoreductase	Thioredoxin + NADP+ <=> Thioredoxin disulfide + NADPH + H+	C00342 + C00006 <=> C00343 + C00005 + C00080	KEGG	1.8.1.9	1.8.1.9
R02017	2'-Deoxyadenosine 5'-diphosphate:oxidized-thioredoxin 2'-oxidoreductase	2'-Deoxyadenosine 5'-diphosphate:oxidized-thioredoxin 2'-oxidoreductase	dADP + Thioredoxin disulfide + H2O <=> Thioredoxin + ADP	C00206 + C00343 + C00001 <=> C00342 + C00008	KEGG	1.17.4.1	1.17.4.1
R02018	2'-Deoxyuridine 5'-diphosphate:oxidized-thioredoxin 2'-oxidoreductase	2'-Deoxyuridine 5'-diphosphate:oxidized-thioredoxin 2'-oxidoreductase	dUDP + Thioredoxin disulfide + H2O <=> Thioredoxin + UDP	C01346 + C00343 + C00001 <=> C00342 + C00015	KEGG	1.17.4.1	1.17.4.1
R02019	2'-Deoxyguanosine 5'-diphosphate:oxidized-thioredoxin 2'-oxidoreductase	2'-Deoxyguanosine 5'-diphosphate:oxidized-thioredoxin 2'-oxidoreductase	dGDP + Thioredoxin disulfide + H2O <=> GDP + Thioredoxin	C00361 + C00343 + C00001 <=> C00035 + C00342	KEGG	1.17.4.1	1.17.4.1
R02020	2'-Deoxyguanosine 5'-triphosphate:oxydized-thioredoxin 2'-oxidoreductase	2'-Deoxyguanosine 5'-triphosphate:oxydized-thioredoxin 2'-oxidoreductase	dGTP + Thioredoxin disulfide + H2O <=> GTP + Thioredoxin	C00286 + C00343 + C00001 <=> C00044 + C00342	KEGG	1.17.4.2	1.17.4.2
R02021	adenosine 3',5'-bisphosphate,sulfite:oxidized-thioredoxin oxidoreductase (3'-phosphoadenosine-5'-phosphosulfate -forming)	adenosine 3',5'-bisphosphate,sulfite:oxidized-thioredoxin oxidoreductase (3'-phosphoadenosine-5'-phosphosulfate -forming)	Thioredoxin + 3'-Phosphoadenylyl sulfate <=> Thioredoxin disulfide + Sulfite + Adenosine 3',5'-bisphosphate	C00342 + C00053 <=> C00343 + C00094 + C00054	KEGG	1.8.4.8	1.8.4.8
R02022	2'-Deoxyuridine 5'-triphosphate:oxydized-thioredoxin 2'-oxidoreductase	2'-Deoxyuridine 5'-triphosphate:oxydized-thioredoxin 2'-oxidoreductase	dCTP + Thioredoxin disulfide + H2O <=> CTP + Thioredoxin	C00458 + C00343 + C00001 <=> C00063 + C00342	KEGG	1.17.4.2	1.17.4.2
R02023	2'-Deoxyuridine 5'-triphosphate:oxydized-thioredoxin 2'-oxidoreductase	2'-Deoxyuridine 5'-triphosphate:oxydized-thioredoxin 2'-oxidoreductase	dUTP + Thioredoxin disulfide + H2O <=> UTP + Thioredoxin	C00460 + C00343 + C00001 <=> C00075 + C00342	KEGG	1.17.4.2	1.17.4.2
R02024	2'-Deoxycytidine diphosphate:oxidized-thioredoxin 2'-oxidoreductase	2'-Deoxycytidine diphosphate:oxidized-thioredoxin 2'-oxidoreductase	dCDP + Thioredoxin disulfide + H2O <=> Thioredoxin + CDP	C00705 + C00343 + C00001 <=> C00342 + C00112	KEGG	1.17.4.1	1.17.4.1
R02025	L-methionine:oxidized-thioredoxin S-oxidoreductase	L-methionine:oxidized-thioredoxin S-oxidoreductase	L-Methionine + Thioredoxin disulfide + H2O <=> L-Methionine S-oxide + Thioredoxin	C00073 + C00343 + C00001 <=> C02989 + C00342	KEGG	1.8.4.13，1.8.4.14	1.8.4.13
R02026	O-acetyl-L-homoserine acetate-lyase (L-homocysteine forming)	O-acetyl-L-homoserine acetate-lyase (L-homocysteine forming)	O-Acetyl-L-homoserine + Thiosulfate + Thioredoxin + H+ <=> L-Homocysteine + Sulfite + Thioredoxin disulfide + Acetate	C01077 + C00320 + C00342 + C00080 <=> C00155 + C00094 + C00343 + C00033	KEGG
R02027	Phosphatidylglycerol cholinephosphohydrolase	Phosphatidylglycerol cholinephosphohydrolase	Phosphatidylglycerol + H2O <=> 1,2-Diacyl-sn-glycerol + sn-Glycerol 3-phosphate	C00344 + C00001 <=> C00641 + C00093	KEGG	3.1.4.3	3.1.4.3
R02029	Phosphatidylglycerophosphate phosphohydrolase	Phosphatidylglycerophosphate phosphohydrolase	Phosphatidylglycerophosphate + H2O <=> Phosphatidylglycerol + Orthophosphate	C03892 + C00001 <=> C00344 + C00009	KEGG	3.1.3.27	3.1.3.27
R02030	CDP-diacylglycerol:phosphatidylglycerol 3-phosphatidyltransferase	CDP-diacylglycerol:phosphatidylglycerol 3-phosphatidyltransferase	Phosphatidylglycerol + CDP-diacylglycerol <=> Cardiolipin + CMP	C00344 + C00269 <=> C05980 + C00055	KEGG	2.7.8.-	2.7.8.-
R02032	6-Phospho-2-dehydro-D-gluconate:NAD+ 2-oxidoreductase	6-Phospho-2-dehydro-D-gluconate:NAD+ 2-oxidoreductase	6-Phospho-D-gluconate + NAD+ <=> 6-Phospho-2-dehydro-D-gluconate + NADH + H+	C00345 + C00003 <=> C01218 + C00004 + C00080	KEGG	1.1.1.43	1.1.1.43
R02034	6-phospho-D-gluconate:NADP+ 2-oxidoreductase	6-phospho-D-gluconate:NADP+ 2-oxidoreductase	6-Phospho-D-gluconate + NADP+ <=> 6-Phospho-2-dehydro-D-gluconate + NADPH + H+	C00345 + C00006 <=> C01218 + C00005 + C00080	KEGG	1.1.1.43	1.1.1.43
R02035	6-Phospho-D-glucono-1,5-lactone lactonohydrolase	6-Phospho-D-glucono-1,5-lactone lactonohydrolase	D-Glucono-1,5-lactone 6-phosphate + H2O <=> 6-Phospho-D-gluconate	C01236 + C00001 <=> C00345	KEGG	3.1.1.31	3.1.1.31
R02036	6-Phospho-D-gluconate hydro-lyase(2-dehydro-3-deoxy-6-phospho-D-gluconate-forming)	6-Phospho-D-gluconate hydro-lyase(2-dehydro-3-deoxy-6-phospho-D-gluconate-forming)	6-Phospho-D-gluconate <=> 2-Dehydro-3-deoxy-6-phospho-D-gluconate + H2O	C00345 <=> C04442 + C00001	KEGG	4.2.1.12	4.2.1.12
R02037	S-Adenosyl-L-methionine:ethanolamine-phosphate N-methyltransferase	S-Adenosyl-L-methionine:ethanolamine-phosphate N-methyltransferase	S-Adenosyl-L-methionine + Ethanolamine phosphate <=> S-Adenosyl-L-homocysteine + N-Methylethanolamine phosphate	C00019 + C00346 <=> C00021 + C01210	KEGG	2.1.1.103	2.1.1.103
R02038	CTP:ethanolamine-phosphate cytidylyltransferase	CTP:ethanolamine-phosphate cytidylyltransferase	CTP + Ethanolamine phosphate <=> Diphosphate + CDP-ethanolamine	C00063 + C00346 <=> C00013 + C00570	KEGG	2.7.7.14	2.7.7.14
R02039	long-chain-aldehyde:NAD+ oxidoreductase	long-chain-aldehyde:NAD+ oxidoreductase	Long-chain aldehyde + NAD+ + H2O <=> Long-chain carboxylate + NADH + H+	C00609 + C00003 + C00001 <=> C00347 + C00004 + C00080	KEGG	1.2.1.48	1.2.1.48
R02040	N-Long-chain-fatty-acyl-L-glutamate amidohydrolase	N-Long-chain-fatty-acyl-L-glutamate amidohydrolase	N-Long-chain-fatty-acyl-L-glutamate + H2O <=> Long-chain carboxylate + L-Glutamate	C04305 + C00001 <=> C00347 + C00025	KEGG	3.5.1.55	3.5.1.55
R02041	N-(Long-chain-acyl)ethanolamine amidohydrolase	N-(Long-chain-acyl)ethanolamine amidohydrolase	N-(Long-chain-acyl)ethanolamine + H2O <=> Long-chain carboxylate + Ethanolamine	C04080 + C00001 <=> C00347 + C00189	KEGG	3.5.1.60	3.5.1.60
R02042	Wax-ester acylhydrolase	Wax-ester acylhydrolase	Wax ester + H2O <=> Long-chain alcohol + Long-chain carboxylate	C01629 + C00001 <=> C00339 + C00347	KEGG	3.1.1.50	3.1.1.50
R02047	3-Hydroxy-2-methylpropanoate:NAD+ oxidoreductase	3-Hydroxy-2-methylpropanoate:NAD+ oxidoreductase	3-Hydroxy-2-methylpropanoate + NAD+ <=> 2-Methyl-3-oxopropanoate + NADH + H+	C01188 + C00003 <=> C00349 + C00004 + C00080	KEGG	1.1.1.31	1.1.1.31
R02050	(R)-3-Amino-2-methylpropanoate:pyruvate aminotransferase	(R)-3-Amino-2-methylpropanoate:pyruvate aminotransferase	(R)-3-Amino-2-methylpropanoate + Pyruvate <=> 2-Methyl-3-oxopropanoate + L-Alanine	C01205 + C00022 <=> C00349 + C00041	KEGG	2.6.1.40	2.6.1.40
R02051	Phosphatidylethanolamine phosphatidohydrolase	Phosphatidylethanolamine phosphatidohydrolase	Phosphatidylethanolamine + H2O <=> Ethanolamine + Phosphatidate	C00350 + C00001 <=> C00189 + C00416	KEGG	3.1.4.4	3.1.4.4
R02052	Phosphatidylethanolamine ethanolaminephosphohydrolase	Phosphatidylethanolamine ethanolaminephosphohydrolase	Phosphatidylethanolamine + H2O <=> 1,2-Diacyl-sn-glycerol + Ethanolamine phosphate	C00350 + C00001 <=> C00641 + C00346	KEGG	3.1.4.3	3.1.4.3
R02053	Phosphatidylethanolamine 2-acylhydrolase	Phosphatidylethanolamine 2-acylhydrolase	Phosphatidylethanolamine + H2O <=> 1-Acyl-sn-glycero-3-phosphoethanolamine + Fatty acid	C00350 + C00001 <=> C04438 + C00162	KEGG	3.1.1.4	3.1.1.4
R02054	Phosphatidylethanolamine 1-acylhydrolase	Phosphatidylethanolamine 1-acylhydrolase	Phosphatidylethanolamine + H2O <=> 2-Acyl-sn-glycero-3-phosphoethanolamine + Fatty acid	C00350 + C00001 <=> C05973 + C00162	KEGG	3.1.1.32	3.1.1.32
R02055	Phsophatidyl-L-serine carboxy-lyase	Phsophatidyl-L-serine carboxy-lyase	Phosphatidylserine <=> Phosphatidylethanolamine + CO2	C02737 <=> C00350 + C00011	KEGG	4.1.1.65	4.1.1.65
R02056	S-Adenosyl-L-methionine:phosphatidylethanolamine N-methyltransferase	S-Adenosyl-L-methionine:phosphatidylethanolamine N-methyltransferase	S-Adenosyl-L-methionine + Phosphatidylethanolamine <=> S-Adenosyl-L-homocysteine + Phosphatidyl-N-methylethanolamine	C00019 + C00350 <=> C00021 + C01241	KEGG	2.1.1.17	2.1.1.17
R02057	CDPethanolamine:1,2-diacylglycerol ethanolaminephosphotransferase	CDPethanolamine:1,2-diacylglycerol ethanolaminephosphotransferase	CDP-ethanolamine + 1,2-Diacyl-sn-glycerol <=> CMP + Phosphatidylethanolamine	C00570 + C00641 <=> C00055 + C00350	KEGG	2.7.8.1	2.7.8.1
R02058	acetyl-CoA:D-glucosamine-6-phosphate N-acetyltransferase	acetyl-CoA:D-glucosamine-6-phosphate N-acetyltransferase	Acetyl-CoA + D-Glucosamine 6-phosphate <=> CoA + N-Acetyl-D-glucosamine 6-phosphate	C00024 + C00352 <=> C00010 + C00357	KEGG	2.3.1.4	2.3.1.4
R02059	N-Acetyl-D-glucosamine-6-phosphate amidohydrolase	N-Acetyl-D-glucosamine-6-phosphate amidohydrolase	N-Acetyl-D-glucosamine 6-phosphate + H2O <=> D-Glucosamine 6-phosphate + Acetate	C00357 + C00001 <=> C00352 + C00033	KEGG	3.5.1.25	3.5.1.25
R02060	D-Glucosamine 1-phosphate 1,6-phosphomutase; D-glucosamine 1,6-phosphomutase	D-glucosamine 1,6-phosphomutase	alpha-D-Glucosamine 1-phosphate <=> D-Glucosamine 6-phosphate	C06156 <=> C00352	KEGG	5.4.2.10	5.4.2.10
R02061	trans,trans-Farnesyl-diphosphate:isopentenyl-diphosphate farnesyltranstransferase	trans,trans-Farnesyl-diphosphate:isopentenyl-diphosphate farnesyltranstransferase	trans,trans-Farnesyl diphosphate + Isopentenyl diphosphate <=> Diphosphate + Geranylgeranyl diphosphate	C00448 + C00129 <=> C00013 + C00353	KEGG	2.5.1.29	2.5.1.29
R02063	geranylgeranyl reductase	geranylgeranyl reductase	Geranylgeranyl diphosphate + 3 H+ + 3 NADPH <=> Phytyl diphosphate + 3 NADP+	C00353 + 3 C00080 + 3 C00005 <=> C05427 + 3 C00006	KEGG	1.3.1.83	1.3.1.83
R02064	Geranylgeranyl-diphosphate diphosphate-lyase (cyclizing)	Geranylgeranyl-diphosphate diphosphate-lyase (cyclizing)	Geranylgeranyl diphosphate <=> Casbene + Diphosphate	C00353 <=> C01414 + C00013	KEGG	4.2.3.8	4.2.3.8
R02065	Geranylgeranyl-diphosphate:geranylgeranyl-diphosphate geranylgeranyltransferase	Geranylgeranyl-diphosphate:geranylgeranyl-diphosphate geranylgeranyltransferase	2 Geranylgeranyl diphosphate <=> Diphosphate + Prephytoene diphosphate	2 C00353 <=> C00013 + C03427	KEGG	2.5.1.32	2.5.1.32
R02068	ent-Copalyl-diphosphate lyase	ent-Copalyl-diphosphate lyase	Geranylgeranyl diphosphate <=> ent-Copalyl diphosphate	C00353 <=> C06089	KEGG	5.5.1.13	5.5.1.13
R02071	ATP:D-fructose-1-phosphate 6-phosphotransferase	ATP:D-fructose-1-phosphate 6-phosphotransferase	ATP + D-Fructose 1-phosphate <=> ADP + beta-D-Fructose 1,6-bisphosphate	C00002 + C01094 <=> C00008 + C05378	KEGG	2.7.1.56	2.7.1.56
R02073	diphosphate:beta-D-fructose-6-phosphate 1-phosphotransferase	diphosphate:beta-D-fructose-6-phosphate 1-phosphotransferase	Diphosphate + beta-D-Fructose 6-phosphate <=> Orthophosphate + beta-D-Fructose 1,6-bisphosphate	C00013 + C05345 <=> C00009 + C05378	KEGG	2.7.1.90	2.7.1.90
R02075	3,4-Dihydroxy-L-phenylalanine:oxygen 4,5-oxidoreductase (recyclizing)	3,4-Dihydroxy-L-phenylalanine:oxygen 4,5-oxidoreductase (recyclizing)	3,4-Dihydroxy-L-phenylalanine + Oxygen <=> 4-(L-Alanin-3-yl)-2-hydroxy-cis,cis-muconate 6-semialdehyde	C00355 + C00007 <=> C04796	KEGG	1.13.11.29	1.13.11.29
R02076	3,4-Dihydroxy-L-phenylalanine:oxygen 2,3-oxidoreductase (recyclizing)	3,4-Dihydroxy-L-phenylalanine:oxygen 2,3-oxidoreductase (recyclizing)	3,4-Dihydroxy-L-phenylalanine + Oxygen <=> 5-(L-Alanin-3-yl)-2-hydroxy-cis,cis-muconate 6-semialdehyde	C00355 + C00007 <=> C04797	KEGG	1.13.11.30	1.13.11.30
R02077	3,4-Dihydroxy-L-phenylalanine:2-oxoglutarate aminotransferase	3,4-Dihydroxy-L-phenylalanine:2-oxoglutarate aminotransferase	3,4-Dihydroxy-L-phenylalanine + 2-Oxoglutarate <=> 3-(3,4-Dihydroxyphenyl)pyruvate + L-Glutamate	C00355 + C00026 <=> C04045 + C00025	KEGG	2.6.1.49	2.6.1.49
R02078	L-Tyrosine,L-dopa:oxygen oxidoreductase	L-Tyrosine,L-dopa:oxygen oxidoreductase	3,4-Dihydroxy-L-phenylalanine + L-Tyrosine + Oxygen <=> Dopaquinone + 3,4-Dihydroxy-L-phenylalanine + H2O	C00355 + C00082 + C00007 <=> C00822 + C00355 + C00001	KEGG	1.10.3.1，1.14.18.1	1.10.3.1
R02080	3,4-Dihydroxy-L-phenylalanine carboxy-lyase	3,4-Dihydroxy-L-phenylalanine carboxy-lyase	3,4-Dihydroxy-L-phenylalanine <=> Dopamine + CO2	C00355 <=> C03758 + C00011	KEGG	4.1.1.25，4.1.1.28	4.1.1.25
R02081	(R)-Mevalonate:NAD+ oxidoreductase (CoA-acetylating)	(R)-Mevalonate:NAD+ oxidoreductase (CoA-acetylating)	(R)-Mevalonate + CoA + 2 NAD+ <=> (S)-3-Hydroxy-3-methylglutaryl-CoA + 2 NADH + 2 H+	C00418 + C00010 + 2 C00003 <=> C00356 + 2 C00004 + 2 C00080	KEGG	1.1.1.88	1.1.1.88
R02082	(R)-Mevalonate:NADP+ oxidoreductase (CoA acylating)	(R)-Mevalonate:NADP+ oxidoreductase (CoA acylating)	(R)-Mevalonate + CoA + 2 NADP+ <=> (S)-3-Hydroxy-3-methylglutaryl-CoA + 2 NADPH + 2 H+	C00418 + C00010 + 2 C00006 <=> C00356 + 2 C00005 + 2 C00080	KEGG	1.1.1.34	1.1.1.34
R02083	(S)-3-Hydroxy-3-methylglutaryl-CoA hydrolase	(S)-3-Hydroxy-3-methylglutaryl-CoA hydrolase	(S)-3-Hydroxy-3-methylglutaryl-CoA + H2O <=> CoA + 3-Hydroxy-3-methylglutarate	C00356 + C00001 <=> C00010 + C03761	KEGG	3.1.2.5	3.1.2.5
R02084	succinyl-CoA:3-hydroxy-3-methylglutarate CoA-transferase	succinyl-CoA:3-hydroxy-3-methylglutarate CoA-transferase	Succinyl-CoA + 3-Hydroxy-3-methylglutarate <=> Succinate + (S)-3-Hydroxy-3-methylglutaryl-CoA	C00091 + C03761 <=> C00042 + C00356	KEGG	2.8.3.13	2.8.3.13
R02085	(S)-3-Hydroxy-3-methylglutaryl-CoA hydro-lyase (trans-3-methylglutaconyl-CoA-forming)	(S)-3-Hydroxy-3-methylglutaryl-CoA hydro-lyase (trans-3-methylglutaconyl-CoA-forming)	(S)-3-Hydroxy-3-methylglutaryl-CoA <=> 3-Methylglutaconyl-CoA + H2O	C00356 <=> C03231 + C00001	KEGG	4.2.1.18	4.2.1.18
R02087	N-Acetyl-D-glucosamine 6-phosphate 2-epimerase	N-Acetyl-D-glucosamine 6-phosphate 2-epimerase	N-Acetyl-D-glucosamine 6-phosphate <=> N-Acetyl-D-mannosamine 6-phosphate	C00357 <=> C04257	KEGG	5.1.3.9	5.1.3.9
[truncated: 6,712 more rows]

## Sheet: Expasy-ENZYME
ENZYNE Protein-Reaction association(CC1 to CC14 are all notes of each enzyne)
[truncated: 5,351 more rows]
