# Supplementary material for: Reconstruction and In Silico Analysis of Metabolic Network for an Oleaginous Yeast, Yarrowia lipolytica
Source: PLoS One. 2012 Dec 7;7(12):e51535. doi: 10.1371/journal.pone.0051535 (PMC3518092; doi:10.1371/journal.pone.0051535)
Supplement: Additional file S4 — Results of flux balance analysis and flux variability analysis and information used to help determine the in silico minimal media. (XLSX) [file pone.0051535.s004.xlsx]

## Sheet: Sheet1
keggID	abbreviation	compartment	character	stoichiometric coefficient	revesibility	keggformula	iMM904		formulaNeutral	charge	formula
C00001	h2o	c	reactant		r	H2O	H2O		H2O
C00001	h2o	c	reactant		r	H2O	H2O
C00001	h2o	c	reactant		irev	H2O	H2O
C00001	h2o	c	reactant	2	irev	H2O	H2O
C00001	h2o	c	reactant	2	irev	H2O	H2O
C00001	h2o	c	reactant		irev	H2O	H2O
C00001	h2o	c	reactant		irev	H2O	H2O
C00001	h2o	c	reactant		irev	H2O	H2O
C00001	h2o	c	reactant		irev	H2O	H2O
C00001	h2o	m	reactant		irev	H2O	H2O
C00001	h2o	c	reactant		irev	H2O	H2O
C00001	h2o	c	reactant		irev	H2O	H2O
C00001	h2o	c	reactant		irev	H2O	H2O
C00001	h2o	c	reactant	2	irev	H2O	H2O
C00001	h2o	c	Product		r	H2O	H2O
C00001	h2o	c	reactant		irev	H2O	H2O
C00001	h2o	c	reactant		irev	H2O	H2O
C00001	h2o	c	reactant		irev	H2O	H2O
C00001	h2o	c	reactant		irev	H2O	H2O
C00001	h2o	c	reactant		irev	H2O	H2O
C00001	h2o	c	reactant		r	H2O	H2O
C00001	h2o	c	reactant		r	H2O	H2O
C00001	h2o	c	reactant		irev	H2O	H2O
C00001	h2o	c	Product		irev	H2O	H2O
C00001	h2o	c	reactant		irev	H2O	H2O
C00001	h2o	c	reactant		irev	H2O	H2O
C00001	h2o	c	Product		irev	H2O	H2O
C00001	h2o	c	reactant		irev	H2O	H2O
C00001	h2o	c	Product	2	irev	H2O	H2O
C00001	h2o	c	Product	3	irev	H2O	H2O
C00001	h2o	c	Product		irev	H2O	H2O
C00001	h2o	c	Product		irev	H2O	H2O
C00001	h2o	c	Product		irev	H2O	H2O
C00001	h2o	c	Product		irev	H2O	H2O
C00001	h2o	c	Product		irev	H2O	H2O
C00001	h2o	c	Product		irev	H2O	H2O
C00001	h2o	c	Product		irev	H2O	H2O
C00001	h2o	c	Product		irev	H2O	H2O
C00001	h2o	c	Product		irev	H2O	H2O
C00001	h2o	c	Product		irev	H2O	H2O
C00001	h2o	c	Product	3	irev	H2O	H2O
C00001	h2o	c	Product		irev	H2O	H2O
C00001	h2o	c	Product	3	irev	H2O	H2O
C00001	h2o	c	Product	3	irev	H2O	H2O
C00001	h2o	c	Product	3	irev	H2O	H2O
C00001	h2o	c	Product	2	irev	H2O	H2O
C00001	h2o	c	Product	2	irev	H2O	H2O
C00001	h2o	c	Product	2	irev	H2O	H2O
C00001	h2o	c	Product	2	irev	H2O	H2O
C00001	h2o	c	Product	3	irev	H2O	H2O
C00001	h2o	c	Product		irev	H2O	H2O
C00001	h2o	c	Product		irev	H2O	H2O
C00001	h2o	c	Product		irev	H2O	H2O
C00001	h2o	c	Product	3	irev	H2O	H2O
C00001	h2o	c	Product	3	irev	H2O	H2O
C00001	h2o	c	Product		irev	H2O	H2O
C00001	h2o	c	Product	5	irev	H2O	H2O
C00001	h2o	c	Product	3	irev	H2O	H2O
C00001	h2o	c	Product		irev	H2O	H2O
C00001	h2o	c	reactant		r	H2O	H2O
C00001	h2o	c	reactant		r	H2O	H2O
C00001	h2o	c	reactant		r	H2O	H2O
C00001	h2o	c	reactant		r	H2O	H2O
C00001	h2o	c	reactant		r	H2O	H2O
C00001	h2o	c	reactant		r	H2O	H2O
C00001	h2o	c	reactant		r	H2O	H2O
C00001	h2o	c	reactant		r	H2O	H2O
C00001	h2o	m	reactant		r	H2O	H2O
C00001	h2o	m	reactant	3	irev	H2O	H2O
C00001	h2o	m	Product		r	H2O	H2O
C00001	h2o	m	Product		r	H2O	H2O
C00001	h2o	m	Product		r	H2O	H2O
C00001	h2o	m	Product		r	H2O	H2O
C00001	h2o	m	Product		r	H2O	H2O
C00001	h2o	m	reactant	3	irev	H2O	H2O
C00001	h2o	m	reactant	6	irev	H2O	H2O
C00001	h2o	m	reactant	6	irev	H2O	H2O
C00001	h2o	m	reactant	7	irev	H2O	H2O
C00001	h2o	m	reactant	7	irev	H2O	H2O
C00001	h2o	m	reactant	8	irev	H2O	H2O
C00001	h2o	m	reactant	8	irev	H2O	H2O
C00001	h2o	m	reactant	8	irev	H2O	H2O
C00001	h2o	m	reactant	8	irev	H2O	H2O
C00001	h2o	m	reactant	8	irev	H2O	H2O
C00001	h2o	m	reactant		irev	H2O	H2O
C00001	h2o	m	reactant		irev	H2O	H2O
C00001	h2o	m	reactant		irev	H2O	H2O
C00001	h2o	m	reactant		irev	H2O	H2O
C00001	h2o	m	reactant		irev	H2O	H2O
C00001	h2o	m	reactant		irev	H2O	H2O
C00001	h2o	m	reactant		irev	H2O	H2O
C00001	h2o	m	Product		irev	H2O	H2O
C00001	h2o	c	reactant	3	irev	H2O	H2O
C00001	h2o	c	reactant		irev	H2O	H2O
C00001	h2o	c	reactant		irev	H2O	H2O
C00001	h2o	c	reactant		irev	H2O	H2O
C00001	h2o	c	reactant		irev	H2O	H2O
C00001	h2o	c	reactant		r	H2O	H2O
C00001	h2o	c	reactant		r	H2O	H2O
C00001	h2o	c	Product		irev	H2O	H2O
C00001	h2o	c	reactant		irev	H2O	H2O
C00001	h2o	c	reactant	2	irev	H2O	H2O
C00001	h2o	c	Product	2	irev	H2O	H2O
C00001	h2o	c	reactant		r	H2O	H2O
C00001	h2o	c	reactant		irev	H2O	H2O
C00001	h2o	c	reactant		r	H2O	H2O
C00001	h2o	c	reactant		irev	H2O	H2O
C00001	h2o	c	reactant		irev	H2O	H2O
C00001	h2o	c	reactant		irev	H2O	H2O
C00001	h2o	c	reactant		irev	H2O	H2O
C00001	h2o	c	reactant		irev	H2O	H2O
C00001	h2o	c	reactant		irev	H2O	H2O
C00001	h2o	m	reactant		irev	H2O	H2O
C00001	h2o	c	reactant		irev	H2O	H2O
C00001	h2o	c	reactant		irev	H2O	H2O
C00001	h2o	c	reactant		irev	H2O	H2O
C00001	h2o	c	reactant		irev	H2O	H2O
C00001	h2o	c	reactant		irev	H2O	H2O
C00001	h2o	c	Product		r	H2O	H2O
C00001	h2o	m	reactant		irev	H2O	H2O
C00001	h2o	m	reactant		irev	H2O	H2O
C00001	h2o	c	reactant		irev	H2O	H2O
C00001	h2o	x	reactant		irev	H2O	H2O
C00001	h2o	x	Product		r	H2O	H2O
C00001	h2o	c	reactant		irev	H2O	H2O
C00001	h2o	c	Product		irev	H2O	H2O
C00001	h2o	c	reactant		irev	H2O	H2O
C00001	h2o	c	reactant		irev	H2O	H2O
C00001	h2o	c	reactant		irev	H2O	H2O
C00001	h2o	c	reactant		irev	H2O	H2O
C00001	h2o	c	Product	2	irev	H2O	H2O
C00001	h2o	c	reactant		r	H2O	H2O
C00001	h2o	c	reactant		r	H2O	H2O
C00001	h2o	m	reactant		irev	H2O	H2O
C00001	h2o	c	reactant		r	H2O	H2O
C00001	h2o	c	reactant		r	H2O	H2O
C00001	h2o	m	Product		r	H2O	H2O
C00001	h2o	m	reactant		irev	H2O	H2O
C00001	h2o	m	Product	2	irev	H2O	H2O
C00001	h2o	c	reactant		irev	H2O	H2O
C00001	h2o	m	reactant		irev	H2O	H2O
C00001	h2o	c	reactant		irev	H2O	H2O
C00001	h2o	m	Product		irev	H2O	H2O
C00001	h2o	c	reactant		irev	H2O	H2O
C00001	h2o	c	reactant		irev	H2O	H2O
C00001	h2o	c	reactant		irev	H2O	H2O
C00001	h2o	c	reactant		r	H2O	H2O
C00001	h2o	c	Product		r	H2O	H2O
C00001	h2o	c	reactant		r	H2O	H2O
C00001	h2o	m	reactant		irev	H2O	H2O
C00001	h2o	c	reactant		irev	H2O	H2O
C00001	h2o	c	reactant		r	H2O	H2O
C00001	h2o	c	reactant		r	H2O	H2O
C00001	h2o	c	reactant		irev	H2O	H2O
C00001	h2o	c	reactant		r	H2O	H2O
C00001	h2o	c	Product		irev	H2O	H2O
C00001	h2o	c	reactant		irev	H2O	H2O
C00001	h2o	c	reactant		r	H2O	H2O
C00001	h2o	c	reactant		irev	H2O	H2O
C00001	h2o	c	reactant		irev	H2O	H2O
C00001	h2o	c	Product		irev	H2O	H2O
C00001	h2o	c	Product		irev	H2O	H2O
C00001	h2o	c	reactant		irev	H2O	H2O
C00001	h2o	c	reactant		r	H2O	H2O
C00001	h2o	c	reactant		r	H2O	H2O
C00001	h2o	c	reactant		irev	H2O	H2O
C00001	h2o	c	reactant		irev	H2O	H2O
C00001	h2o	c	reactant		irev	H2O	H2O
C00001	h2o	c	reactant		irev	H2O	H2O
C00001	h2o	c	reactant		irev	H2O	H2O
C00001	h2o	c	reactant		irev	H2O	H2O
C00001	h2o	c	reactant		r	H2O	H2O
C00001	h2o	c	reactant		irev	H2O	H2O
C00001	h2o	c	reactant		irev	H2O	H2O
C00001	h2o	c	reactant		irev	H2O	H2O
C00001	h2o	c	reactant		irev	H2O	H2O
C00001	h2o	c	reactant		r	H2O	H2O
C00001	h2o	c	reactant		r	H2O	H2O
C00001	h2o	c	reactant		r	H2O	H2O
C00001	h2o	c	reactant		irev	H2O	H2O
C00001	h2o	c	reactant		irev	H2O	H2O
C00001	h2o	c	reactant		irev	H2O	H2O
C00001	h2o	c	reactant		irev	H2O	H2O
C00001	h2o	c	reactant		irev	H2O	H2O
C00001	h2o	c	reactant		irev	H2O	H2O
C00001	h2o	c	reactant		irev	H2O	H2O
C00001	h2o	c	reactant		irev	H2O	H2O
C00001	h2o	c	reactant		irev	H2O	H2O
C00001	h2o	c	reactant		irev	H2O	H2O
C00001	h2o	c	reactant		irev	H2O	H2O
C00001	h2o	c	reactant		irev	H2O	H2O
C00001	h2o	c	Product		r	H2O	H2O
C00001	h2o	c	reactant		irev	H2O	H2O
C00001	h2o	c	Product		r	H2O	H2O
C00001	h2o	c	Product		r	H2O	H2O
C00001	h2o	c	Product		irev	H2O	H2O
C00001	h2o	c	Product	2	irev	H2O	H2O
C00001	h2o	c	reactant		irev	H2O	H2O
C00001	h2o	c	Product		irev	H2O	H2O
C00001	h2o	c	Product	2	irev	H2O	H2O
C00001	h2o	c	Product		irev	H2O	H2O
C00001	h2o	c	Product		irev	H2O	H2O
C00001	h2o	c	reactant		irev	H2O	H2O
C00001	h2o	c	reactant		irev	H2O	H2O
C00001	h2o	c	reactant		irev	H2O	H2O
C00001	h2o	c	reactant		irev	H2O	H2O
C00001	h2o	n	reactant		r	H2O	H2O
C00001	h2o	c	reactant		irev	H2O	H2O
C00001	h2o	c	reactant		r	H2O	H2O
C00001	h2o	c	reactant		irev	H2O	H2O
C00001	h2o	c	reactant		irev	H2O	H2O
C00001	h2o	c	reactant		irev	H2O	H2O
C00001	h2o	c	reactant		irev	H2O	H2O
C00001	h2o	c	reactant		irev	H2O	H2O
C00001	h2o	c	reactant		irev	H2O	H2O
C00001	h2o	c	reactant		irev	H2O	H2O
C00001	h2o	c	reactant		irev	H2O	H2O
C00001	h2o	c	reactant		irev	H2O	H2O
C00001	h2o	c	reactant		irev	H2O	H2O
C00001	h2o	c	reactant		irev	H2O	H2O
C00001	h2o	c	Product		irev	H2O	H2O
C00001	h2o	m	reactant		irev	H2O	H2O
C00001	h2o	c	reactant		irev	H2O	H2O
C00001	h2o	c	reactant	3	irev	H2O	H2O
C00001	h2o	e	reactant		irev	H2O	H2O
C00001	h2o	c	Product	2	irev	H2O	H2O
C00001	h2o	c	reactant		irev	H2O	H2O
C00001	h2o	c	reactant		irev	H2O	H2O
C00001	h2o	c	reactant		irev	H2O	H2O
C00001	h2o	c	Product	3	irev	H2O	H2O
C00001	h2o	c	reactant		irev	H2O	H2O
C00001	h2o	c	reactant		irev	H2O	H2O
C00001	h2o	c	Product		irev	H2O	H2O
C00001	h2o	c	Product		irev	H2O	H2O
C00001	h2o	c	Product		irev	H2O	H2O
C00001	h2o	c	Product		irev	H2O	H2O
C00001	h2o	c	Product		irev	H2O	H2O
C00001	h2o	c	reactant		irev	H2O	H2O
C00001	h2o	c	reactant		irev	H2O	H2O
C00001	h2o	c	reactant		irev	H2O	H2O
C00001	h2o	c	reactant		irev	H2O	H2O
C00001	h2o	c	reactant		irev	H2O	H2O
C00001	h2o	c	reactant		irev	H2O	H2O
C00001	h2o	c	reactant		irev	H2O	H2O
C00001	h2o	c	reactant		r	H2O	H2O
C00001	h2o	c	Product	4	irev	H2O	H2O
C00001	h2o	c	Product	4	irev	H2O	H2O
C00001	h2o	r	Product		irev	H2O	H2O
C00001	h2o	c	reactant		irev	H2O	H2O
C00001	h2o	c	reactant		irev	H2O	H2O
C00001	h2o	m	reactant		irev	H2O	H2O
C00001	h2o	m	Product		r	H2O	H2O
C00001	h2o	c	reactant		irev	H2O	H2O
C00001	h2o	c	reactant		r	H2O	H2O
C00001	h2o	c	reactant		irev	H2O	H2O
C00001	h2o	c	reactant		r	H2O	H2O
C00001	h2o	c	reactant		irev	H2O	H2O
C00001	h2o	c	Product		irev	H2O	H2O
C00001	h2o	c	reactant		irev	H2O	H2O
C00001	h2o	c	reactant		irev	H2O	H2O
C00001	h2o	c	reactant		irev	H2O	H2O
C00001	h2o	c	Product		irev	H2O	H2O
C00001	h2o	c	reactant		irev	H2O	H2O
C00001	h2o	c	reactant		irev	H2O	H2O
C00001	h2o	c	reactant		r	H2O	H2O
C00001	h2o	c	reactant		r	H2O	H2O
C00001	h2o	c	reactant		irev	H2O	H2O
C00001	h2o	c	reactant		irev	H2O	H2O
C00001	h2o	c	reactant		irev	H2O	H2O
C00001	h2o	m	Product		irev	H2O	H2O
C00001	h2o	m	Product		irev	H2O	H2O
C00001	h2o	c	reactant		irev	H2O	H2O
C00001	h2o	c	reactant		irev	H2O	H2O
C00001	h2o	c	reactant		irev	H2O	H2O
C00001	h2o	c	Product		r	H2O	H2O
C00001	h2o	c	reactant		irev	H2O	H2O
C00001	h2o	c	Product		irev	H2O	H2O
C00001	h2o	c	reactant		irev	H2O	H2O
C00001	h2o	m	Product		irev	H2O	H2O
C00001	h2o	m	Product		irev	H2O	H2O
C00002	atp	c	reactant		irev	C10H16N5O13P3	C10H16N5O13P3
C00002	atp	c	reactant		irev	C10H16N5O13P3	C10H16N5O13P3
C00002	atp	c	reactant		r	C10H16N5O13P3	C10H16N5O13P3
C00002	atp	c	reactant		irev	C10H16N5O13P3	C10H16N5O13P3
C00002	atp	c	reactant		r	C10H16N5O13P3	C10H16N5O13P3
C00002	atp	c	reactant		r	C10H16N5O13P3	C10H16N5O13P3
C00002	atp	m	reactant		irev	C10H16N5O13P3	C10H16N5O13P3
C00002	atp	c	reactant		irev	C10H16N5O13P3	C10H16N5O13P3
C00002	atp	c	reactant		r	C10H16N5O13P3	C10H16N5O13P3
C00002	atp	c	reactant		r	C10H16N5O13P3	C10H16N5O13P3
C00002	atp	c	reactant		r	C10H16N5O13P3	C10H16N5O13P3
C00002	atp	c	reactant		r	C10H16N5O13P3	C10H16N5O13P3
C00002	atp	c	reactant		r	C10H16N5O13P3	C10H16N5O13P3
C00002	atp	c	reactant		r	C10H16N5O13P3	C10H16N5O13P3
C00002	atp	c	reactant		r	C10H16N5O13P3	C10H16N5O13P3
C00002	atp	c	reactant		r	C10H16N5O13P3	C10H16N5O13P3
C00002	atp	c	reactant		r	C10H16N5O13P3	C10H16N5O13P3
C00002	atp	c	reactant		r	C10H16N5O13P3	C10H16N5O13P3
C00002	atp	c	reactant		r	C10H16N5O13P3	C10H16N5O13P3
C00002	atp	c	reactant		r	C10H16N5O13P3	C10H16N5O13P3
C00002	atp	c	reactant		r	C10H16N5O13P3	C10H16N5O13P3
C00002	atp	c	reactant		irev	C10H16N5O13P3	C10H16N5O13P3
C00002	atp	m	reactant		r	C10H16N5O13P3	C10H16N5O13P3
C00002	atp	m	reactant		r	C10H16N5O13P3	C10H16N5O13P3
C00002	atp	m	reactant		r	C10H16N5O13P3	C10H16N5O13P3
C00002	atp	m	reactant		r	C10H16N5O13P3	C10H16N5O13P3
C00002	atp	m	reactant		r	C10H16N5O13P3	C10H16N5O13P3
C00002	atp	m	reactant		r	C10H16N5O13P3	C10H16N5O13P3
C00002	atp	m	reactant		r	C10H16N5O13P3	C10H16N5O13P3
C00002	atp	m	reactant		r	C10H16N5O13P3	C10H16N5O13P3
C00002	atp	m	reactant		r	C10H16N5O13P3	C10H16N5O13P3
C00002	atp	m	reactant		r	C10H16N5O13P3	C10H16N5O13P3
C00002	atp	m	reactant		r	C10H16N5O13P3	C10H16N5O13P3
C00002	atp	m	reactant		r	C10H16N5O13P3	C10H16N5O13P3
C00002	atp	m	reactant		irev	C10H16N5O13P3	C10H16N5O13P3
C00002	atp	c	reactant		r	C10H16N5O13P3	C10H16N5O13P3
C00002	atp	c	reactant		irev	C10H16N5O13P3	C10H16N5O13P3
C00002	atp	c	reactant		irev	C10H16N5O13P3	C10H16N5O13P3
C00002	atp	c	reactant		irev	C10H16N5O13P3	C10H16N5O13P3
C00002	atp	c	reactant		irev	C10H16N5O13P3	C10H16N5O13P3
C00002	atp	c	reactant		irev	C10H16N5O13P3	C10H16N5O13P3
C00002	atp	c	reactant		irev	C10H16N5O13P3	C10H16N5O13P3
C00002	atp	c	reactant		irev	C10H16N5O13P3	C10H16N5O13P3
C00002	atp	c	reactant		irev	C10H16N5O13P3	C10H16N5O13P3
C00002	atp	c	reactant		irev	C10H16N5O13P3	C10H16N5O13P3
C00002	atp	c	reactant		irev	C10H16N5O13P3	C10H16N5O13P3
C00002	atp	c	reactant		irev	C10H16N5O13P3	C10H16N5O13P3
C00002	atp	c	reactant		irev	C10H16N5O13P3	C10H16N5O13P3
C00002	atp	c	reactant		irev	C10H16N5O13P3	C10H16N5O13P3
C00002	atp	c	reactant		irev	C10H16N5O13P3	C10H16N5O13P3
C00002	atp	c	reactant		irev	C10H16N5O13P3	C10H16N5O13P3
C00002	atp	c	reactant		irev	C10H16N5O13P3	C10H16N5O13P3
C00002	atp	c	reactant		irev	C10H16N5O13P3	C10H16N5O13P3
C00002	atp	c	reactant		irev	C10H16N5O13P3	C10H16N5O13P3
C00002	atp	c	reactant		irev	C10H16N5O13P3	C10H16N5O13P3
C00002	atp	c	reactant		r	C10H16N5O13P3	C10H16N5O13P3
C00002	atp	c	reactant		irev	C10H16N5O13P3	C10H16N5O13P3
C00002	atp	c	reactant		irev	C10H16N5O13P3	C10H16N5O13P3
C00002	atp	c	reactant		irev	C10H16N5O13P3	C10H16N5O13P3
C00002	atp	c	Product		irev	C10H16N5O13P3	C10H16N5O13P3
C00002	atp	c	reactant		irev	C10H16N5O13P3	C10H16N5O13P3
C00002	atp	c	reactant		irev	C10H16N5O13P3	C10H16N5O13P3
C00002	atp	c	reactant		irev	C10H16N5O13P3	C10H16N5O13P3
C00002	atp	m	Product		irev	C10H16N5O13P3	C10H16N5O13P3
C00002	atp	m	reactant		irev	C10H16N5O13P3	C10H16N5O13P3
C00002	atp	c	reactant		irev	C10H16N5O13P3	C10H16N5O13P3
C00002	atp	m	reactant		irev	C10H16N5O13P3	C10H16N5O13P3
C00002	atp	c	reactant		irev	C10H16N5O13P3	C10H16N5O13P3
C00002	atp	c	reactant		irev	C10H16N5O13P3	C10H16N5O13P3
C00002	atp	c	reactant		irev	C10H16N5O13P3	C10H16N5O13P3
C00002	atp	c	reactant		irev	C10H16N5O13P3	C10H16N5O13P3
C00002	atp	c	reactant		irev	C10H16N5O13P3	C10H16N5O13P3
C00002	atp	c	reactant		irev	C10H16N5O13P3	C10H16N5O13P3
C00002	atp	c	reactant		irev	C10H16N5O13P3	C10H16N5O13P3
C00002	atp	c	reactant		irev	C10H16N5O13P3	C10H16N5O13P3
C00002	atp	c	reactant		r	C10H16N5O13P3	C10H16N5O13P3
C00002	atp	c	reactant		irev	C10H16N5O13P3	C10H16N5O13P3
C00002	atp	c	reactant		irev	C10H16N5O13P3	C10H16N5O13P3
C00002	atp	c	reactant		irev	C10H16N5O13P3	C10H16N5O13P3
C00002	atp	c	reactant		irev	C10H16N5O13P3	C10H16N5O13P3
C00002	atp	c	reactant		r	C10H16N5O13P3	C10H16N5O13P3
C00002	atp	c	reactant		r	C10H16N5O13P3	C10H16N5O13P3
C00002	atp	c	reactant		r	C10H16N5O13P3	C10H16N5O13P3
C00002	atp	c	reactant		r	C10H16N5O13P3	C10H16N5O13P3
C00002	atp	c	Product		r	C10H16N5O13P3	C10H16N5O13P3
C00002	atp	c	reactant		r	C10H16N5O13P3	C10H16N5O13P3
C00002	atp	c	reactant		r	C10H16N5O13P3	C10H16N5O13P3
C00002	atp	c	reactant		r	C10H16N5O13P3	C10H16N5O13P3
C00002	atp	c	reactant		r	C10H16N5O13P3	C10H16N5O13P3
C00002	atp	c	reactant		r	C10H16N5O13P3	C10H16N5O13P3
C00002	atp	c	reactant		r	C10H16N5O13P3	C10H16N5O13P3
C00002	atp	c	reactant		r	C10H16N5O13P3	C10H16N5O13P3
C00002	atp	c	reactant		r	C10H16N5O13P3	C10H16N5O13P3
C00002	atp	c	reactant		irev	C10H16N5O13P3	C10H16N5O13P3
C00002	atp	c	reactant		irev	C10H16N5O13P3	C10H16N5O13P3
C00002	atp	c	reactant		r	C10H16N5O13P3	C10H16N5O13P3
C00002	atp	c	reactant		irev	C10H16N5O13P3	C10H16N5O13P3
C00002	atp	c	reactant		irev	C10H16N5O13P3	C10H16N5O13P3
C00002	atp	c	reactant		irev	C10H16N5O13P3	C10H16N5O13P3
C00002	atp	c	reactant		irev	C10H16N5O13P3	C10H16N5O13P3
C00002	atp	c	reactant		irev	C10H16N5O13P3	C10H16N5O13P3
C00002	atp	c	reactant		r	C10H16N5O13P3	C10H16N5O13P3
C00002	atp	c	reactant		irev	C10H16N5O13P3	C10H16N5O13P3
C00002	atp	c	reactant		irev	C10H16N5O13P3	C10H16N5O13P3
C00002	atp	c	reactant		r	C10H16N5O13P3	C10H16N5O13P3
C00002	atp	c	reactant		r	C10H16N5O13P3	C10H16N5O13P3
C00002	atp	c	reactant		r	C10H16N5O13P3	C10H16N5O13P3
C00002	atp	c	reactant		r	C10H16N5O13P3	C10H16N5O13P3
C00002	atp	c	reactant		r	C10H16N5O13P3	C10H16N5O13P3
C00002	atp	c	reactant		r	C10H16N5O13P3	C10H16N5O13P3
C00002	atp	c	reactant		r	C10H16N5O13P3	C10H16N5O13P3
C00002	atp	c	reactant		r	C10H16N5O13P3	C10H16N5O13P3
C00002	atp	c	reactant		r	C10H16N5O13P3	C10H16N5O13P3
C00002	atp	c	reactant		r	C10H16N5O13P3	C10H16N5O13P3
C00002	atp	c	reactant		irev	C10H16N5O13P3	C10H16N5O13P3
C00002	atp	c	reactant		irev	C10H16N5O13P3	C10H16N5O13P3
C00002	atp	c	reactant	2	irev	C10H16N5O13P3	C10H16N5O13P3
C00002	atp	c	reactant		irev	C10H16N5O13P3	C10H16N5O13P3
C00002	atp	c	reactant		irev	C10H16N5O13P3	C10H16N5O13P3
C00002	atp	c	reactant		irev	C10H16N5O13P3	C10H16N5O13P3
C00002	atp	c	reactant		irev	C10H16N5O13P3	C10H16N5O13P3
C00002	atp	c	reactant		irev	C10H16N5O13P3	C10H16N5O13P3
C00002	atp	c	reactant		irev	C10H16N5O13P3	C10H16N5O13P3
C00002	atp	c	reactant		irev	C10H16N5O13P3	C10H16N5O13P3
C00002	atp	c	reactant		irev	C10H16N5O13P3	C10H16N5O13P3
C00002	atp	c	reactant		irev	C10H16N5O13P3	C10H16N5O13P3
C00002	atp	m	reactant		r	C10H16N5O13P3	C10H16N5O13P3
C00002	atp	c	reactant		irev	C10H16N5O13P3	C10H16N5O13P3
C00002	atp	c	reactant		irev	C10H16N5O13P3	C10H16N5O13P3
C00002	atp	c	reactant		irev	C10H16N5O13P3	C10H16N5O13P3
C00002	atp	c	reactant		irev	C10H16N5O13P3	C10H16N5O13P3
C00002	atp	c	reactant		irev	C10H16N5O13P3	C10H16N5O13P3
C00002	atp	c	reactant		irev	C10H16N5O13P3	C10H16N5O13P3
C00002	atp	c	reactant		irev	C10H16N5O13P3	C10H16N5O13P3
C00002	atp	c	reactant		irev	C10H16N5O13P3	C10H16N5O13P3
C00002	atp	c	reactant		irev	C10H16N5O13P3	C10H16N5O13P3
C00002	atp	c	reactant		irev	C10H16N5O13P3	C10H16N5O13P3
C00002	atp	m	reactant		irev	C10H16N5O13P3	C10H16N5O13P3
C00002	atp	m	reactant		irev	C10H16N5O13P3	C10H16N5O13P3
C00002	atp	m	reactant		irev	C10H16N5O13P3	C10H16N5O13P3
C00002	atp	c	reactant		irev	C10H16N5O13P3	C10H16N5O13P3
C00002	atp	c	reactant		irev	C10H16N5O13P3	C10H16N5O13P3
C00002	atp	c	reactant		irev	C10H16N5O13P3	C10H16N5O13P3
C00002	atp	c	reactant		irev	C10H16N5O13P3	C10H16N5O13P3
C00003	nad	c	Product		irev	C21H28N7O14P2	C21H28N7O14P2		C21H28N7O14P2
C00003	nad	c	reactant		r	C21H28N7O14P2	C21H28N7O14P2		C21H28N7O14P2
C00003	nad	c	reactant		irev	C21H28N7O14P2	C21H28N7O14P2
C00003	nad	m	reactant		irev	C21H28N7O14P2	C21H28N7O14P2
C00003	nad	c	reactant		r	C21H28N7O14P2	C21H28N7O14P2
C00003	nad	c	reactant		irev	C21H28N7O14P2	C21H28N7O14P2
C00003	nad	c	reactant		irev	C21H28N7O14P2	C21H28N7O14P2
C00003	nad	c	reactant		irev	C21H28N7O14P2	C21H28N7O14P2
C00003	nad	m	reactant		r	C21H28N7O14P2	C21H28N7O14P2
C00003	nad	m	reactant	3	irev	C21H28N7O14P2	C21H28N7O14P2
C00003	nad	m	Product		r	C21H28N7O14P2	C21H28N7O14P2
C00003	nad	m	Product		r	C21H28N7O14P2	C21H28N7O14P2
C00003	nad	m	Product		r	C21H28N7O14P2	C21H28N7O14P2
C00003	nad	m	Product		r	C21H28N7O14P2	C21H28N7O14P2
C00003	nad	m	Product		r	C21H28N7O14P2	C21H28N7O14P2
C00003	nad	m	reactant	3	irev	C21H28N7O14P2	C21H28N7O14P2
C00003	nad	m	reactant	6	irev	C21H28N7O14P2	C21H28N7O14P2
C00003	nad	m	reactant	6	irev	C21H28N7O14P2	C21H28N7O14P2
C00003	nad	m	reactant	7	irev	C21H28N7O14P2	C21H28N7O14P2
C00003	nad	m	reactant	7	irev	C21H28N7O14P2	C21H28N7O14P2
C00003	nad	m	reactant	8	irev	C21H28N7O14P2	C21H28N7O14P2
C00003	nad	m	reactant	8	irev	C21H28N7O14P2	C21H28N7O14P2
C00003	nad	m	reactant	8	irev	C21H28N7O14P2	C21H28N7O14P2
C00003	nad	m	reactant	8	irev	C21H28N7O14P2	C21H28N7O14P2
C00003	nad	m	reactant	8	irev	C21H28N7O14P2	C21H28N7O14P2
C00003	nad	c	reactant		r	C21H28N7O14P2	C21H28N7O14P2
C00003	nad	c	reactant		irev	C21H28N7O14P2	C21H28N7O14P2
C00003	nad	m	reactant		r	C21H28N7O14P2	C21H28N7O14P2
C00003	nad	c	reactant		r	C21H28N7O14P2	C21H28N7O14P2
C00003	nad	c	Product		irev	C21H28N7O14P2	C21H28N7O14P2
C00003	nad	m	Product		irev	C21H28N7O14P2	C21H28N7O14P2
C00003	nad	m	reactant		irev	C21H28N7O14P2	C21H28N7O14P2
C00003	nad	c	reactant		r	C21H28N7O14P2	C21H28N7O14P2
C00003	nad	c	reactant		r	C21H28N7O14P2	C21H28N7O14P2
C00003	nad	m	reactant		irev	C21H28N7O14P2	C21H28N7O14P2
C00003	nad	c	reactant		r	C21H28N7O14P2	C21H28N7O14P2
C00003	nad	c	reactant	2	irev	C21H28N7O14P2	C21H28N7O14P2
C00003	nad	c	reactant		irev	C21H28N7O14P2	C21H28N7O14P2
C00003	nad	c	reactant		irev	C21H28N7O14P2	C21H28N7O14P2
C00003	nad	c	reactant		r	C21H28N7O14P2	C21H28N7O14P2
C00003	nad	m	reactant		r	C21H28N7O14P2	C21H28N7O14P2
C00003	nad	c	reactant		r	C21H28N7O14P2	C21H28N7O14P2
C00003	nad	c	reactant		irev	C21H28N7O14P2	C21H28N7O14P2
C00003	nad	m	Product		irev	C21H28N7O14P2	C21H28N7O14P2
C00003	nad	c	Product		irev	C21H28N7O14P2	C21H28N7O14P2
C00003	nad	m	Product		irev	C21H28N7O14P2	C21H28N7O14P2
C00003	nad	c	Product		irev	C21H28N7O14P2	C21H28N7O14P2
C00003	nad	m	Product		irev	C21H28N7O14P2	C21H28N7O14P2
C00003	nad	c	reactant		r	C21H28N7O14P2	C21H28N7O14P2
C00003	nad	c	Product		irev	C21H28N7O14P2	C21H28N7O14P2
C00003	nad	c	reactant		r	C21H28N7O14P2	C21H28N7O14P2
C00003	nad	c	Product		irev	C21H28N7O14P2	C21H28N7O14P2
C00003	nad	c	reactant	2	r	C21H28N7O14P2	C21H28N7O14P2
C00003	nad	c	reactant		irev	C21H28N7O14P2	C21H28N7O14P2
C00003	nad	c	reactant		irev	C21H28N7O14P2	C21H28N7O14P2
C00003	nad	c	reactant		irev	C21H28N7O14P2	C21H28N7O14P2
C00003	nad	c	reactant		r	C21H28N7O14P2	C21H28N7O14P2
C00003	nad	c	reactant		irev	C21H28N7O14P2	C21H28N7O14P2
C00003	nad	m	reactant		irev	C21H28N7O14P2	C21H28N7O14P2
C00003	nad	m	reactant		r	C21H28N7O14P2	C21H28N7O14P2
C00003	nad	c	Product		irev	C21H28N7O14P2	C21H28N7O14P2
C00003	nad	c	reactant		irev	C21H28N7O14P2	C21H28N7O14P2
C00003	nad	m	reactant		irev	C21H28N7O14P2	C21H28N7O14P2
C00003	nad	m	reactant		r	C21H28N7O14P2	C21H28N7O14P2
C00003	nad	c	reactant		r	C21H28N7O14P2	C21H28N7O14P2
C00003	nad	c	reactant		r	C21H28N7O14P2	C21H28N7O14P2
C00003	nad	c	reactant		irev	C21H28N7O14P2	C21H28N7O14P2
C00003	nad	c	reactant		irev	C21H28N7O14P2	C21H28N7O14P2
C00003	nad	c	Product		irev	C21H28N7O14P2	C21H28N7O14P2
C00003	nad	c	reactant		r	C21H28N7O14P2	C21H28N7O14P2
C00003	nad	c	reactant		r	C21H28N7O14P2	C21H28N7O14P2
C00003	nad	c	reactant		r	C21H28N7O14P2	C21H28N7O14P2
C00003	nad	c	reactant		irev	C21H28N7O14P2	C21H28N7O14P2
C00003	nad	c	reactant		irev	C21H28N7O14P2	C21H28N7O14P2
C00003	nad	c	reactant		r	C21H28N7O14P2	C21H28N7O14P2
C00004	nadh	c	reactant		irev	C21H29N7O14P2	C21H29N7O14P2		C21H29N7O14P2
C00004	nadh	c	Product		r	C21H29N7O14P2	C21H29N7O14P2
C00004	nadh	c	Product		irev	C21H29N7O14P2	C21H29N7O14P2
C00004	nadh	m	Product		irev	C21H29N7O14P2	C21H29N7O14P2
C00004	nadh	c	Product		r	C21H29N7O14P2	C21H29N7O14P2
C00004	nadh	c	Product		irev	C21H29N7O14P2	C21H29N7O14P2
C00004	nadh	c	Product		irev	C21H29N7O14P2	C21H29N7O14P2
C00004	nadh	c	Product		irev	C21H29N7O14P2	C21H29N7O14P2
C00004	nadh	m	Product		r	C21H29N7O14P2	C21H29N7O14P2
C00004	nadh	m	Product	3	irev	C21H29N7O14P2	C21H29N7O14P2
C00004	nadh	m	reactant		r	C21H29N7O14P2	C21H29N7O14P2
C00004	nadh	m	reactant		r	C21H29N7O14P2	C21H29N7O14P2
C00004	nadh	m	reactant		r	C21H29N7O14P2	C21H29N7O14P2
C00004	nadh	m	reactant		r	C21H29N7O14P2	C21H29N7O14P2
C00004	nadh	m	reactant		r	C21H29N7O14P2	C21H29N7O14P2
C00004	nadh	m	Product	3	irev	C21H29N7O14P2	C21H29N7O14P2
C00004	nadh	m	Product	6	irev	C21H29N7O14P2	C21H29N7O14P2
C00004	nadh	m	Product	6	irev	C21H29N7O14P2	C21H29N7O14P2
C00004	nadh	m	Product	7	irev	C21H29N7O14P2	C21H29N7O14P2
C00004	nadh	m	Product	7	irev	C21H29N7O14P2	C21H29N7O14P2
C00004	nadh	m	Product	8	irev	C21H29N7O14P2	C21H29N7O14P2
C00004	nadh	m	Product	8	irev	C21H29N7O14P2	C21H29N7O14P2
C00004	nadh	m	Product	8	irev	C21H29N7O14P2	C21H29N7O14P2
C00004	nadh	m	Product	8	irev	C21H29N7O14P2	C21H29N7O14P2
C00004	nadh	m	Product	8	irev	C21H29N7O14P2	C21H29N7O14P2
C00004	nadh	c	Product		r	C21H29N7O14P2	C21H29N7O14P2
C00004	nadh	c	Product		irev	C21H29N7O14P2	C21H29N7O14P2
C00004	nadh	m	Product		r	C21H29N7O14P2	C21H29N7O14P2
C00004	nadh	c	Product		r	C21H29N7O14P2	C21H29N7O14P2
C00004	nadh	c	reactant		irev	C21H29N7O14P2	C21H29N7O14P2
C00004	nadh	m	reactant		irev	C21H29N7O14P2	C21H29N7O14P2
C00004	nadh	m	Product		irev	C21H29N7O14P2	C21H29N7O14P2
C00004	nadh	c	Product		r	C21H29N7O14P2	C21H29N7O14P2
C00004	nadh	c	Product		r	C21H29N7O14P2	C21H29N7O14P2
C00004	nadh	m	Product		irev	C21H29N7O14P2	C21H29N7O14P2
C00004	nadh	c	Product		r	C21H29N7O14P2	C21H29N7O14P2
C00004	nadh	c	Product	2	irev	C21H29N7O14P2	C21H29N7O14P2
C00004	nadh	c	Product		irev	C21H29N7O14P2	C21H29N7O14P2
C00004	nadh	c	Product		irev	C21H29N7O14P2	C21H29N7O14P2
C00004	nadh	c	Product		r	C21H29N7O14P2	C21H29N7O14P2
C00004	nadh	m	Product		r	C21H29N7O14P2	C21H29N7O14P2
C00004	nadh	c	Product		r	C21H29N7O14P2	C21H29N7O14P2
C00004	nadh	c	Product		irev	C21H29N7O14P2	C21H29N7O14P2
C00004	nadh	m	reactant		irev	C21H29N7O14P2	C21H29N7O14P2
C00004	nadh	c	reactant		irev	C21H29N7O14P2	C21H29N7O14P2
C00004	nadh	m	reactant		irev	C21H29N7O14P2	C21H29N7O14P2
C00004	nadh	c	Product		r	C21H29N7O14P2	C21H29N7O14P2
C00004	nadh	c	reactant		irev	C21H29N7O14P2	C21H29N7O14P2
C00004	nadh	c	Product		r	C21H29N7O14P2	C21H29N7O14P2
C00004	nadh	c	reactant		irev	C21H29N7O14P2	C21H29N7O14P2
C00004	nadh	c	Product	2	r	C21H29N7O14P2	C21H29N7O14P2
C00004	nadh	c	Product		irev	C21H29N7O14P2	C21H29N7O14P2
C00004	nadh	c	Product		irev	C21H29N7O14P2	C21H29N7O14P2
C00004	nadh	c	Product		r	C21H29N7O14P2	C21H29N7O14P2
C00004	nadh	c	Product		irev	C21H29N7O14P2	C21H29N7O14P2
C00004	nadh	m	Product		irev	C21H29N7O14P2	C21H29N7O14P2
C00004	nadh	m	Product		r	C21H29N7O14P2	C21H29N7O14P2
C00004	nadh	c	reactant		irev	C21H29N7O14P2	C21H29N7O14P2
C00004	nadh	c	Product		irev	C21H29N7O14P2	C21H29N7O14P2
C00004	nadh	m	Product		irev	C21H29N7O14P2	C21H29N7O14P2
C00004	nadh	m	Product		r	C21H29N7O14P2	C21H29N7O14P2
C00004	nadh	c	Product		r	C21H29N7O14P2	C21H29N7O14P2
C00004	nadh	c	Product		r	C21H29N7O14P2	C21H29N7O14P2
C00004	nadh	c	Product		irev	C21H29N7O14P2	C21H29N7O14P2
C00004	nadh	c	Product		irev	C21H29N7O14P2	C21H29N7O14P2
C00004	nadh	c	reactant		irev	C21H29N7O14P2	C21H29N7O14P2
C00004	nadh	c	Product		r	C21H29N7O14P2	C21H29N7O14P2
C00004	nadh	c	Product		r	C21H29N7O14P2	C21H29N7O14P2
C00004	nadh	c	Product		r	C21H29N7O14P2	C21H29N7O14P2
C00004	nadh	c	Product		irev	C21H29N7O14P2	C21H29N7O14P2
C00004	nadh	c	Product		irev	C21H29N7O14P2	C21H29N7O14P2
C00004	nadh	c	Product		r	C21H29N7O14P2	C21H29N7O14P2
C00005	nadph	c	reactant		irev	C21H30N7O17P3	C21H30N7O17P3		C21H30N7O17P3
C00005	nadph	c	Product		r	C21H30N7O17P3	C21H30N7O17P3
C00005	nadph	c	Product		irev	C21H30N7O17P3	C21H30N7O17P3
C00005	nadph	c	Product		r	C21H30N7O17P3	C21H30N7O17P3
C00005	nadph	c	reactant		irev	C21H30N7O17P3	C21H30N7O17P3
C00005	nadph	m	reactant		irev	C21H30N7O17P3	C21H30N7O17P3
C00005	nadph	c	Product		irev	C21H30N7O17P3	C21H30N7O17P3
C00005	nadph	c	Product		r	C21H30N7O17P3	C21H30N7O17P3
C00005	nadph	c	reactant	6	irev	C21H30N7O17P3	C21H30N7O17P3
C00005	nadph	c	reactant	6	irev	C21H30N7O17P3	C21H30N7O17P3
C00005	nadph	c	reactant	2	irev	C21H30N7O17P3	C21H30N7O17P3
C00005	nadph	c	reactant	2	irev	C21H30N7O17P3	C21H30N7O17P3
C00005	nadph	c	reactant	2	irev	C21H30N7O17P3	C21H30N7O17P3
C00005	nadph	c	reactant	2	irev	C21H30N7O17P3	C21H30N7O17P3
C00005	nadph	c	reactant	2	irev	C21H30N7O17P3	C21H30N7O17P3
C00005	nadph	c	reactant	2	irev	C21H30N7O17P3	C21H30N7O17P3
C00005	nadph	c	reactant	2	irev	C21H30N7O17P3	C21H30N7O17P3
C00005	nadph	c	reactant	2	irev	C21H30N7O17P3	C21H30N7O17P3
C00005	nadph	c	reactant	2	irev	C21H30N7O17P3	C21H30N7O17P3
C00005	nadph	c	reactant	2	irev	C21H30N7O17P3	C21H30N7O17P3
C00005	nadph	c	reactant	6	irev	C21H30N7O17P3	C21H30N7O17P3
C00005	nadph	c	reactant	2	irev	C21H30N7O17P3	C21H30N7O17P3
C00005	nadph	c	reactant	3	irev	C21H30N7O17P3	C21H30N7O17P3
C00005	nadph	c	reactant	3	irev	C21H30N7O17P3	C21H30N7O17P3
C00005	nadph	c	reactant	3	irev	C21H30N7O17P3	C21H30N7O17P3
C00005	nadph	c	reactant		irev	C21H30N7O17P3	C21H30N7O17P3
C00005	nadph	c	reactant		irev	C21H30N7O17P3	C21H30N7O17P3
C00005	nadph	c	reactant		irev	C21H30N7O17P3	C21H30N7O17P3
C00005	nadph	c	reactant		irev	C21H30N7O17P3	C21H30N7O17P3
C00005	nadph	c	reactant	6	irev	C21H30N7O17P3	C21H30N7O17P3
C00005	nadph	c	reactant	2	irev	C21H30N7O17P3	C21H30N7O17P3
C00005	nadph	c	reactant	2	irev	C21H30N7O17P3	C21H30N7O17P3
C00005	nadph	c	reactant	2	irev	C21H30N7O17P3	C21H30N7O17P3
C00005	nadph	c	reactant	3	irev	C21H30N7O17P3	C21H30N7O17P3
C00005	nadph	c	reactant	3	irev	C21H30N7O17P3	C21H30N7O17P3
C00005	nadph	c	reactant	2	irev	C21H30N7O17P3	C21H30N7O17P3
C00005	nadph	c	reactant	4	irev	C21H30N7O17P3	C21H30N7O17P3
C00005	nadph	c	reactant	3	irev	C21H30N7O17P3	C21H30N7O17P3
C00005	nadph	c	reactant	2	irev	C21H30N7O17P3	C21H30N7O17P3
C00005	nadph	m	reactant		irev	C21H30N7O17P3	C21H30N7O17P3
C00005	nadph	m	reactant		irev	C21H30N7O17P3	C21H30N7O17P3
C00005	nadph	m	reactant		irev	C21H30N7O17P3	C21H30N7O17P3
C00005	nadph	m	reactant	2	irev	C21H30N7O17P3	C21H30N7O17P3
C00005	nadph	m	reactant		irev	C21H30N7O17P3	C21H30N7O17P3
C00005	nadph	c	Product		r	C21H30N7O17P3	C21H30N7O17P3
C00005	nadph	c	Product		r	C21H30N7O17P3	C21H30N7O17P3
C00005	nadph	c	reactant		irev	C21H30N7O17P3	C21H30N7O17P3
C00005	nadph	c	reactant		irev	C21H30N7O17P3	C21H30N7O17P3
C00005	nadph	c	reactant		irev	C21H30N7O17P3	C21H30N7O17P3
C00005	nadph	m	Product		irev	C21H30N7O17P3	C21H30N7O17P3
C00005	nadph	c	Product		r	C21H30N7O17P3	C21H30N7O17P3
C00005	nadph	c	Product		r	C21H30N7O17P3	C21H30N7O17P3
C00005	nadph	c	Product		r	C21H30N7O17P3	C21H30N7O17P3
C00005	nadph	c	reactant		irev	C21H30N7O17P3	C21H30N7O17P3
C00005	nadph	c	Product		r	C21H30N7O17P3	C21H30N7O17P3
C00005	nadph	c	reactant		irev	C21H30N7O17P3	C21H30N7O17P3
C00005	nadph	c	Product		irev	C21H30N7O17P3	C21H30N7O17P3
C00005	nadph	c	Product		irev	C21H30N7O17P3	C21H30N7O17P3
C00005	nadph	c	Product		irev	C21H30N7O17P3	C21H30N7O17P3
C00005	nadph	c	reactant		irev	C21H30N7O17P3	C21H30N7O17P3
C00005	nadph	c	Product		r	C21H30N7O17P3	C21H30N7O17P3
C00005	nadph	c	reactant		irev	C21H30N7O17P3	C21H30N7O17P3
C00005	nadph	c	reactant		irev	C21H30N7O17P3	C21H30N7O17P3
C00005	nadph	c	reactant	3	irev	C21H30N7O17P3	C21H30N7O17P3
C00005	nadph	c	reactant		irev	C21H30N7O17P3	C21H30N7O17P3
C00005	nadph	c	reactant		irev	C21H30N7O17P3	C21H30N7O17P3
C00005	nadph	c	reactant		irev	C21H30N7O17P3	C21H30N7O17P3
C00005	nadph	c	reactant		irev	C21H30N7O17P3	C21H30N7O17P3
C00005	nadph	c	reactant		irev	C21H30N7O17P3	C21H30N7O17P3
C00005	nadph	c	reactant		irev	C21H30N7O17P3	C21H30N7O17P3
C00005	nadph	c	Product		irev	C21H30N7O17P3	C21H30N7O17P3
C00005	nadph	c	reactant		irev	C21H30N7O17P3	C21H30N7O17P3
C00005	nadph	c	reactant	3	irev	C21H30N7O17P3	C21H30N7O17P3
C00005	nadph	c	reactant	3	irev	C21H30N7O17P3	C21H30N7O17P3
C00005	nadph	r	reactant		irev	C21H30N7O17P3	C21H30N7O17P3
C00005	nadph	c	reactant		irev	C21H30N7O17P3	C21H30N7O17P3
C00005	nadph	r	reactant		irev	C21H30N7O17P3	C21H30N7O17P3
C00005	nadph	c	reactant		irev	C21H30N7O17P3	C21H30N7O17P3
C00005	nadph	c	Product		irev	C21H30N7O17P3	C21H30N7O17P3
C00005	nadph	c	Product		irev	C21H30N7O17P3	C21H30N7O17P3
C00005	nadph	c	reactant	2	irev	C21H30N7O17P3	C21H30N7O17P3
C00005	nadph	m	Product		irev	C21H30N7O17P3	C21H30N7O17P3
C00005	nadph	c	Product		r	C21H30N7O17P3	C21H30N7O17P3
C00005	nadph	c	reactant		irev	C21H30N7O17P3	C21H30N7O17P3
C00005	nadph	c	Product		r	C21H30N7O17P3	C21H30N7O17P3
C00005	nadph	m	Product		r	C21H30N7O17P3	C21H30N7O17P3
C00005	nadph	m	Product		r	C21H30N7O17P3	C21H30N7O17P3
C00005	nadph	m	reactant		irev	C21H30N7O17P3	C21H30N7O17P3
C00006	nadp	c	Product		irev	C21H29N7O17P3	0	1	C21H29N7O17P3
C00006	nadp	c	reactant		r	C21H29N7O17P3	0	1
C00006	nadp	c	reactant		irev	C21H29N7O17P3	0	1
C00006	nadp	c	reactant		r	C21H29N7O17P3	0	1
C00006	nadp	c	Product		irev	C21H29N7O17P3	0	1
C00006	nadp	m	Product		irev	C21H29N7O17P3	0	1
C00006	nadp	c	reactant		irev	C21H29N7O17P3	0	1
C00006	nadp	c	reactant		r	C21H29N7O17P3	0	1
C00006	nadp	c	Product	6	irev	C21H29N7O17P3	0	1
C00006	nadp	c	Product	6	irev	C21H29N7O17P3	0	1
C00006	nadp	c	Product	2	irev	C21H29N7O17P3	0	1
C00006	nadp	c	Product	2	irev	C21H29N7O17P3	0	1
C00006	nadp	c	Product	2	irev	C21H29N7O17P3	0	1
C00006	nadp	c	Product	2	irev	C21H29N7O17P3	0	1
C00006	nadp	c	Product	2	irev	C21H29N7O17P3	0	1
C00006	nadp	c	Product	2	irev	C21H29N7O17P3	0	1
C00006	nadp	c	Product	2	irev	C21H29N7O17P3	0	1
C00006	nadp	c	Product	2	irev	C21H29N7O17P3	0	1
C00006	nadp	c	Product	2	irev	C21H29N7O17P3	0	1
C00006	nadp	c	Product	2	irev	C21H29N7O17P3	0	1
C00006	nadp	c	Product	6	irev	C21H29N7O17P3	0	1
C00006	nadp	c	Product	2	irev	C21H29N7O17P3	0	1
C00006	nadp	c	Product	3	irev	C21H29N7O17P3	0	1
C00006	nadp	c	Product	3	irev	C21H29N7O17P3	0	1
C00006	nadp	c	Product	3	irev	C21H29N7O17P3	0	1
C00006	nadp	c	Product		irev	C21H29N7O17P3	0	1
C00006	nadp	c	Product		irev	C21H29N7O17P3	0	1
C00006	nadp	c	Product		irev	C21H29N7O17P3	0	1
C00006	nadp	c	Product		irev	C21H29N7O17P3	0	1
C00006	nadp	c	Product	6	irev	C21H29N7O17P3	0	1
C00006	nadp	c	Product	2	irev	C21H29N7O17P3	0	1
C00006	nadp	c	Product	2	irev	C21H29N7O17P3	0	1
C00006	nadp	c	Product	2	irev	C21H29N7O17P3	0	1
C00006	nadp	c	Product	3	irev	C21H29N7O17P3	0	1
C00006	nadp	c	Product	3	irev	C21H29N7O17P3	0	1
C00006	nadp	c	Product	2	irev	C21H29N7O17P3	0	1
C00006	nadp	c	Product	4	irev	C21H29N7O17P3	0	1
C00006	nadp	c	Product	3	irev	C21H29N7O17P3	0	1
C00006	nadp	c	Product	2	irev	C21H29N7O17P3	0	1
C00006	nadp	m	Product		irev	C21H29N7O17P3	0	1
C00006	nadp	m	Product		irev	C21H29N7O17P3	0	1
C00006	nadp	m	Product		irev	C21H29N7O17P3	0	1
C00006	nadp	m	Product	2	irev	C21H29N7O17P3	0	1
C00006	nadp	m	Product		irev	C21H29N7O17P3	0	1
C00006	nadp	c	reactant		r	C21H29N7O17P3	0	1
C00006	nadp	c	reactant		r	C21H29N7O17P3	0	1
C00006	nadp	c	Product		irev	C21H29N7O17P3	0	1
C00006	nadp	c	Product		irev	C21H29N7O17P3	0	1
C00006	nadp	c	Product		irev	C21H29N7O17P3	0	1
C00006	nadp	m	reactant		irev	C21H29N7O17P3	0	1
C00006	nadp	c	reactant		r	C21H29N7O17P3	0	1
C00006	nadp	c	reactant		r	C21H29N7O17P3	0	1
C00006	nadp	c	reactant		r	C21H29N7O17P3	0	1
C00006	nadp	c	Product		irev	C21H29N7O17P3	0	1
C00006	nadp	c	reactant		r	C21H29N7O17P3	0	1
C00006	nadp	c	Product		irev	C21H29N7O17P3	0	1
C00006	nadp	c	reactant		irev	C21H29N7O17P3	0	1
C00006	nadp	c	reactant		irev	C21H29N7O17P3	0	1
C00006	nadp	c	reactant		irev	C21H29N7O17P3	0	1
C00006	nadp	c	Product		irev	C21H29N7O17P3	0	1
C00006	nadp	c	reactant		r	C21H29N7O17P3	0	1
C00006	nadp	c	Product		irev	C21H29N7O17P3	0	1
C00006	nadp	c	Product		irev	C21H29N7O17P3	0	1
C00006	nadp	c	Product	3	irev	C21H29N7O17P3	0	1
C00006	nadp	c	Product		irev	C21H29N7O17P3	0	1
C00006	nadp	c	Product		irev	C21H29N7O17P3	0	1
C00006	nadp	c	Product		irev	C21H29N7O17P3	0	1
C00006	nadp	c	Product		irev	C21H29N7O17P3	0	1
C00006	nadp	c	Product		irev	C21H29N7O17P3	0	1
C00006	nadp	c	Product		irev	C21H29N7O17P3	0	1
C00006	nadp	c	reactant		irev	C21H29N7O17P3	0	1
C00006	nadp	c	Product		irev	C21H29N7O17P3	0	1
C00006	nadp	c	Product	3	irev	C21H29N7O17P3	0	1
C00006	nadp	c	Product	3	irev	C21H29N7O17P3	0	1
C00006	nadp	r	Product		irev	C21H29N7O17P3	0	1
C00006	nadp	c	Product		irev	C21H29N7O17P3	0	1
C00006	nadp	r	Product		irev	C21H29N7O17P3	0	1
C00006	nadp	c	Product		irev	C21H29N7O17P3	0	1
C00006	nadp	c	reactant		irev	C21H29N7O17P3	0	1
C00006	nadp	c	reactant		irev	C21H29N7O17P3	0	1
C00006	nadp	c	Product	2	irev	C21H29N7O17P3	0	1
C00006	nadp	m	reactant		irev	C21H29N7O17P3	0	1
C00006	nadp	c	reactant		r	C21H29N7O17P3	0	1
C00006	nadp	c	Product		irev	C21H29N7O17P3	0	1
C00006	nadp	c	reactant		r	C21H29N7O17P3	0	1
C00006	nadp	m	reactant		r	C21H29N7O17P3	0	1
C00006	nadp	m	reactant		r	C21H29N7O17P3	0	1
C00006	nadp	m	Product		irev	C21H29N7O17P3	0	1
C00007	o2	c	reactant		irev	O2	O2
C00007	o2	c	reactant		irev	O2	O2
C00007	o2	c	reactant		irev	O2	O2
C00007	o2	c	reactant		irev	O2	O2
C00007	o2	c	reactant		irev	O2	O2
C00007	o2	c	reactant		irev	O2	O2
C00007	o2	c	reactant		irev	O2	O2
C00007	o2	c	reactant		irev	O2	O2
C00007	o2	c	reactant		irev	O2	O2
C00007	o2	c	reactant		irev	O2	O2
C00007	o2	c	reactant		irev	O2	O2
C00007	o2	c	reactant		irev	O2	O2
C00007	o2	c	reactant		irev	O2	O2
C00007	o2	c	reactant	2	irev	O2	O2
C00007	o2	c	reactant		irev	O2	O2
C00007	o2	m	reactant		irev	O2	O2
C00007	o2	m	reactant	3	irev	O2	O2
C00007	o2	m	reactant		irev	O2	O2
C00007	o2	m	reactant		irev	O2	O2
C00007	o2	m	reactant		irev	O2	O2
C00007	o2	m	reactant		irev	O2	O2
C00007	o2	m	reactant		irev	O2	O2
C00007	o2	m	reactant	3	irev	O2	O2
C00007	o2	m	reactant	6	irev	O2	O2
C00007	o2	m	reactant	5	irev	O2	O2
C00007	o2	m	reactant	7	irev	O2	O2
C00007	o2	m	reactant	6	irev	O2	O2
C00007	o2	m	reactant	8	irev	O2	O2
C00007	o2	m	reactant	7	irev	O2	O2
C00007	o2	m	reactant	8	irev	O2	O2
C00007	o2	m	reactant	7	irev	O2	O2
C00007	o2	m	reactant	6	irev	O2	O2
C00007	o2	c	reactant		irev	O2	O2
C00007	o2	c	reactant		irev	O2	O2
C00007	o2	m	reactant		irev	O2	O2
C00007	o2	c	reactant		irev	O2	O2
C00007	o2	c	reactant		r	O2	O2
C00007	o2	c	reactant		irev	O2	O2
C00007	o2	c	reactant		irev	O2	O2
C00007	o2	c	reactant		irev	O2	O2
C00007	o2	m	reactant	3	irev	O2	O2
C00007	o2	c	reactant		irev	O2	O2
C00007	o2	c	reactant		irev	O2	O2
C00007	o2	c	reactant		irev	O2	O2
C00007	o2	c	reactant		irev	O2	O2
C00007	o2	c	reactant		irev	O2	O2
C00007	o2	c	reactant	3	irev	O2	O2
C00007	o2	c	reactant	3	irev	O2	O2
C00007	o2	r	reactant		irev	O2	O2
C00007	o2	c	reactant		irev	O2	O2
C00007	o2	c	reactant		irev	O2	O2
C00007	o2	c	reactant		r	O2	O2
C00007	o2	c	reactant		r	O2	O2
C00007	o2	c	reactant		irev	O2	O2
C00007	o2	c	reactant		irev	O2	O2
C00007	o2	c	reactant		irev	O2	O2
C00007	o2	c	reactant	4	irev	O2	O2
C00007	o2	c	reactant		irev	O2	O2
C00007	o2	c	reactant		irev	O2	O2
C00007	o2	c	reactant		irev	O2	O2
C00007	o2	c	reactant		irev	O2	O2
C00007	o2	c	reactant		irev	O2	O2
C00007	o2	m	reactant		irev	O2	O2
C00007	o2	m	reactant		irev	O2	O2
C00008	adp	c	Product		irev	C10H15N5O10P2	C10H15N5O10P2
C00008	adp	c	Product		r	C10H15N5O10P2	C10H15N5O10P2
C00008	adp	c	Product		irev	C10H15N5O10P2	C10H15N5O10P2
C00008	adp	c	Product		r	C10H15N5O10P2	C10H15N5O10P2
C00008	adp	m	Product		irev	C10H15N5O10P2	C10H15N5O10P2
C00008	adp	c	Product		r	C10H15N5O10P2	C10H15N5O10P2
C00008	adp	c	Product		irev	C10H15N5O10P2	C10H15N5O10P2
C00008	adp	c	Product		r	C10H15N5O10P2	C10H15N5O10P2
C00008	adp	c	Product		irev	C10H15N5O10P2	C10H15N5O10P2
C00008	adp	c	Product		irev	C10H15N5O10P2	C10H15N5O10P2
C00008	adp	c	Product		irev	C10H15N5O10P2	C10H15N5O10P2
C00008	adp	c	Product		irev	C10H15N5O10P2	C10H15N5O10P2
C00008	adp	c	Product		irev	C10H15N5O10P2	C10H15N5O10P2
C00008	adp	c	Product		irev	C10H15N5O10P2	C10H15N5O10P2
C00008	adp	c	Product		irev	C10H15N5O10P2	C10H15N5O10P2
C00008	adp	c	Product		irev	C10H15N5O10P2	C10H15N5O10P2
C00008	adp	c	Product		irev	C10H15N5O10P2	C10H15N5O10P2
C00008	adp	c	Product		irev	C10H15N5O10P2	C10H15N5O10P2
C00008	adp	c	Product		irev	C10H15N5O10P2	C10H15N5O10P2
C00008	adp	c	Product		irev	C10H15N5O10P2	C10H15N5O10P2
C00008	adp	c	Product		irev	C10H15N5O10P2	C10H15N5O10P2
C00008	adp	c	Product		irev	C10H15N5O10P2	C10H15N5O10P2
C00008	adp	c	Product		irev	C10H15N5O10P2	C10H15N5O10P2
C00008	adp	c	Product		irev	C10H15N5O10P2	C10H15N5O10P2
C00008	adp	c	Product		irev	C10H15N5O10P2	C10H15N5O10P2
C00008	adp	c	Product		irev	C10H15N5O10P2	C10H15N5O10P2
C00008	adp	c	Product		r	C10H15N5O10P2	C10H15N5O10P2
C00008	adp	c	Product		irev	C10H15N5O10P2	C10H15N5O10P2
C00008	adp	c	Product		irev	C10H15N5O10P2	C10H15N5O10P2
C00008	adp	c	Product		irev	C10H15N5O10P2	C10H15N5O10P2
C00008	adp	c	reactant		irev	C10H15N5O10P2	C10H15N5O10P2
C00008	adp	c	Product		irev	C10H15N5O10P2	C10H15N5O10P2
C00008	adp	c	Product		irev	C10H15N5O10P2	C10H15N5O10P2
C00008	adp	m	reactant		irev	C10H15N5O10P2	C10H15N5O10P2
C00008	adp	c	Product		irev	C10H15N5O10P2	C10H15N5O10P2
C00008	adp	c	Product		irev	C10H15N5O10P2	C10H15N5O10P2
C00008	adp	c	Product		irev	C10H15N5O10P2	C10H15N5O10P2
C00008	adp	c	Product		irev	C10H15N5O10P2	C10H15N5O10P2
C00008	adp	c	Product		irev	C10H15N5O10P2	C10H15N5O10P2
C00008	adp	c	Product		irev	C10H15N5O10P2	C10H15N5O10P2
C00008	adp	c	Product		irev	C10H15N5O10P2	C10H15N5O10P2
C00008	adp	c	Product		irev	C10H15N5O10P2	C10H15N5O10P2
C00008	adp	c	Product		irev	C10H15N5O10P2	C10H15N5O10P2
C00008	adp	c	Product		irev	C10H15N5O10P2	C10H15N5O10P2
C00008	adp	c	Product		irev	C10H15N5O10P2	C10H15N5O10P2
C00008	adp	c	reactant		irev	C10H15N5O10P2	C10H15N5O10P2
C00008	adp	c	Product		r	C10H15N5O10P2	C10H15N5O10P2
C00008	adp	c	Product	2	r	C10H15N5O10P2	C10H15N5O10P2
C00008	adp	c	Product		r	C10H15N5O10P2	C10H15N5O10P2
C00008	adp	c	reactant		r	C10H15N5O10P2	C10H15N5O10P2
C00008	adp	c	Product		r	C10H15N5O10P2	C10H15N5O10P2
C00008	adp	c	Product		r	C10H15N5O10P2	C10H15N5O10P2
C00008	adp	c	Product		r	C10H15N5O10P2	C10H15N5O10P2
C00008	adp	c	Product		r	C10H15N5O10P2	C10H15N5O10P2
C00008	adp	c	Product		r	C10H15N5O10P2	C10H15N5O10P2
C00008	adp	c	Product		r	C10H15N5O10P2	C10H15N5O10P2
C00008	adp	c	Product		r	C10H15N5O10P2	C10H15N5O10P2
C00008	adp	c	Product		r	C10H15N5O10P2	C10H15N5O10P2
C00008	adp	c	Product		irev	C10H15N5O10P2	C10H15N5O10P2
C00008	adp	c	reactant		irev	C10H15N5O10P2	C10H15N5O10P2
C00008	adp	c	Product		r	C10H15N5O10P2	C10H15N5O10P2
C00008	adp	c	Product		irev	C10H15N5O10P2	C10H15N5O10P2
C00008	adp	c	Product		irev	C10H15N5O10P2	C10H15N5O10P2
C00008	adp	c	Product		irev	C10H15N5O10P2	C10H15N5O10P2
C00008	adp	c	Product		irev	C10H15N5O10P2	C10H15N5O10P2
C00008	adp	c	Product		irev	C10H15N5O10P2	C10H15N5O10P2
C00008	adp	c	Product		irev	C10H15N5O10P2	C10H15N5O10P2
C00008	adp	c	Product		r	C10H15N5O10P2	C10H15N5O10P2
C00008	adp	c	Product		r	C10H15N5O10P2	C10H15N5O10P2
C00008	adp	c	Product		r	C10H15N5O10P2	C10H15N5O10P2
C00008	adp	c	Product		r	C10H15N5O10P2	C10H15N5O10P2
C00008	adp	c	Product		r	C10H15N5O10P2	C10H15N5O10P2
C00008	adp	c	Product		r	C10H15N5O10P2	C10H15N5O10P2
C00008	adp	c	Product		r	C10H15N5O10P2	C10H15N5O10P2
C00008	adp	c	Product		r	C10H15N5O10P2	C10H15N5O10P2
C00008	adp	c	Product		r	C10H15N5O10P2	C10H15N5O10P2
C00008	adp	c	Product		r	C10H15N5O10P2	C10H15N5O10P2
C00008	adp	c	Product		irev	C10H15N5O10P2	C10H15N5O10P2
C00008	adp	c	Product		irev	C10H15N5O10P2	C10H15N5O10P2
C00008	adp	c	Product	2	irev	C10H15N5O10P2	C10H15N5O10P2
C00008	adp	c	Product		irev	C10H15N5O10P2	C10H15N5O10P2
C00008	adp	c	Product		irev	C10H15N5O10P2	C10H15N5O10P2
C00008	adp	c	Product		irev	C10H15N5O10P2	C10H15N5O10P2
C00008	adp	c	Product		irev	C10H15N5O10P2	C10H15N5O10P2
C00008	adp	c	Product		irev	C10H15N5O10P2	C10H15N5O10P2
C00008	adp	c	Product		irev	C10H15N5O10P2	C10H15N5O10P2
C00008	adp	c	Product		irev	C10H15N5O10P2	C10H15N5O10P2
C00008	adp	m	Product		r	C10H15N5O10P2	C10H15N5O10P2
C00008	adp	c	Product		irev	C10H15N5O10P2	C10H15N5O10P2
C00008	adp	c	Product		irev	C10H15N5O10P2	C10H15N5O10P2
C00008	adp	c	Product		irev	C10H15N5O10P2	C10H15N5O10P2
C00008	adp	c	Product		irev	C10H15N5O10P2	C10H15N5O10P2
C00008	adp	c	Product		irev	C10H15N5O10P2	C10H15N5O10P2
C00008	adp	c	Product		irev	C10H15N5O10P2	C10H15N5O10P2
C00008	adp	c	Product		irev	C10H15N5O10P2	C10H15N5O10P2
C00008	adp	c	Product		irev	C10H15N5O10P2	C10H15N5O10P2
C00008	adp	c	Product		irev	C10H15N5O10P2	C10H15N5O10P2
C00009	pi	c	Product		irev	H3PO4	H3O4P	1
C00009	pi	c	Product		r	H3PO4	H3O4P	1
C00009	pi	m	Product		irev	H3PO4	H3O4P	1
C00009	pi	c	Product		irev	H3PO4	H3O4P	1
C00009	pi	m	Product		irev	H3PO4	H3O4P	1
C00009	pi	c	Product		irev	H3PO4	H3O4P	1
C00009	pi	c	reactant		irev	H3PO4	H3O4P	1
C00009	pi	c	Product		irev	H3PO4	H3O4P	1
C00009	pi	c	Product		r	H3PO4	H3O4P	1
C00009	pi	c	Product	3	irev	H3PO4	H3O4P	1
C00009	pi	c	Product		r	H3PO4	H3O4P	1
C00009	pi	c	Product		irev	H3PO4	H3O4P	1
C00009	pi	c	Product		irev	H3PO4	H3O4P	1
C00009	pi	c	Product		irev	H3PO4	H3O4P	1
C00009	pi	c	Product		irev	H3PO4	H3O4P	1
C00009	pi	c	Product		irev	H3PO4	H3O4P	1
C00009	pi	c	Product		irev	H3PO4	H3O4P	1
C00009	pi	c	Product		irev	H3PO4	H3O4P	1
C00009	pi	c	Product		irev	H3PO4	H3O4P	1
C00009	pi	c	Product		irev	H3PO4	H3O4P	1
C00009	pi	m	Product		irev	H3PO4	H3O4P	1
C00009	pi	c	Product		irev	H3PO4	H3O4P	1
C00009	pi	c	Product		irev	H3PO4	H3O4P	1
C00009	pi	c	Product		irev	H3PO4	H3O4P	1
C00009	pi	c	reactant		r	H3PO4	H3O4P	1
C00009	pi	c	Product		irev	H3PO4	H3O4P	1
C00009	pi	c	Product		irev	H3PO4	H3O4P	1
C00009	pi	c	Product	2	irev	H3PO4	H3O4P	1
C00009	pi	m	Product	2	irev	H3PO4	H3O4P	1
C00009	pi	c	Product		irev	H3PO4	H3O4P	1
C00009	pi	m	reactant		irev	H3PO4	H3O4P	1
C00009	pi	c	reactant		r	H3PO4	H3O4P	1
C00009	pi	c	reactant		r	H3PO4	H3O4P	1
C00009	pi	c	Product		irev	H3PO4	H3O4P	1
C00009	pi	c	Product		r	H3PO4	H3O4P	1
C00009	pi	c	Product		irev	H3PO4	H3O4P	1
C00009	pi	c	Product		irev	H3PO4	H3O4P	1
C00009	pi	c	reactant		r	H3PO4	H3O4P	1
C00009	pi	c	reactant		r	H3PO4	H3O4P	1
C00009	pi	c	reactant		r	H3PO4	H3O4P	1
C00009	pi	c	reactant		r	H3PO4	H3O4P	1
C00009	pi	c	reactant		r	H3PO4	H3O4P	1
C00009	pi	c	reactant		r	H3PO4	H3O4P	1
C00009	pi	c	reactant		r	H3PO4	H3O4P	1
C00009	pi	c	Product		irev	H3PO4	H3O4P	1
C00009	pi	c	Product		irev	H3PO4	H3O4P	1
C00009	pi	c	Product		irev	H3PO4	H3O4P	1
C00009	pi	c	Product		irev	H3PO4	H3O4P	1
C00009	pi	c	Product		r	H3PO4	H3O4P	1
C00009	pi	c	Product		irev	H3PO4	H3O4P	1
C00009	pi	c	Product		irev	H3PO4	H3O4P	1
C00009	pi	c	Product		irev	H3PO4	H3O4P	1
C00009	pi	c	Product		irev	H3PO4	H3O4P	1
C00009	pi	c	Product		irev	H3PO4	H3O4P	1
C00009	pi	c	Product		irev	H3PO4	H3O4P	1
C00009	pi	c	Product		irev	H3PO4	H3O4P	1
C00009	pi	c	Product		r	H3PO4	H3O4P	1
C00009	pi	c	Product		irev	H3PO4	H3O4P	1
C00009	pi	c	Product		irev	H3PO4	H3O4P	1
C00009	pi	c	Product		irev	H3PO4	H3O4P	1
C00009	pi	c	Product		irev	H3PO4	H3O4P	1
C00009	pi	c	Product		irev	H3PO4	H3O4P	1
C00009	pi	c	Product		irev	H3PO4	H3O4P	1
C00009	pi	c	Product		irev	H3PO4	H3O4P	1
C00009	pi	c	Product		r	H3PO4	H3O4P	1
C00009	pi	n	Product		irev	H3PO4	H3O4P	1
C00009	pi	c	reactant		irev	H3PO4	H3O4P	1
C00009	pi	c	Product		irev	H3PO4	H3O4P	1
C00009	pi	c	Product		irev	H3PO4	H3O4P	1
C00009	pi	c	Product		irev	H3PO4	H3O4P	1
C00009	pi	c	Product		irev	H3PO4	H3O4P	1
C00009	pi	c	reactant		r	H3PO4	H3O4P	1
C00009	pi	c	reactant		r	H3PO4	H3O4P	1
C00009	pi	c	Product		irev	H3PO4	H3O4P	1
C00009	pi	c	Product		irev	H3PO4	H3O4P	1
C00009	pi	c	Product		irev	H3PO4	H3O4P	1
C00009	pi	c	Product		irev	H3PO4	H3O4P	1
C00009	pi	c	Product		irev	H3PO4	H3O4P	1
C00009	pi	c	Product		irev	H3PO4	H3O4P	1
C00009	pi	c	Product		irev	H3PO4	H3O4P	1
C00009	pi	c	Product		irev	H3PO4	H3O4P	1
C00009	pi	c	Product		irev	H3PO4	H3O4P	1
C00009	pi	e	Product		irev	H3PO4	H3O4P	1
C00009	pi	c	Product		irev	H3PO4	H3O4P	1
C00009	pi	c	Product		irev	H3PO4	H3O4P	1
C00009	pi	c	Product		irev	H3PO4	H3O4P	1
C00009	pi	c	Product		irev	H3PO4	H3O4P	1
C00009	pi	c	Product		irev	H3PO4	H3O4P	1
C00009	pi	c	reactant		irev	H3PO4	H3O4P	1
C00009	pi	c	Product		irev	H3PO4	H3O4P	1
C00009	pi	c	Product		irev	H3PO4	H3O4P	1
C00009	pi	c	Product		irev	H3PO4	H3O4P	1
C00009	pi	m	Product		r	H3PO4	H3O4P	1
C00009	pi	c	Product		irev	H3PO4	H3O4P	1
C00009	pi	c	Product		irev	H3PO4	H3O4P	1
C00009	pi	c	Product		irev	H3PO4	H3O4P	1
C00010	coa	c	Product		irev	C21H36N7O16P3S	C21H36N7O16P3S
C00010	coa	m	Product		irev	C21H36N7O16P3S	C21H36N7O16P3S
C00010	coa	c	Product		irev	C21H36N7O16P3S	C21H36N7O16P3S
C00010	coa	c	Product	4	irev	C21H36N7O16P3S	C21H36N7O16P3S
C00010	coa	c	Product	3	irev	C21H36N7O16P3S	C21H36N7O16P3S
C00010	coa	c	Product		irev	C21H36N7O16P3S	C21H36N7O16P3S
C00010	coa	c	Product		irev	C21H36N7O16P3S	C21H36N7O16P3S
C00010	coa	c	Product		irev	C21H36N7O16P3S	C21H36N7O16P3S
C00010	coa	c	Product		irev	C21H36N7O16P3S	C21H36N7O16P3S
C00010	coa	c	Product		irev	C21H36N7O16P3S	C21H36N7O16P3S
C00010	coa	c	Product		irev	C21H36N7O16P3S	C21H36N7O16P3S
C00010	coa	c	Product		irev	C21H36N7O16P3S	C21H36N7O16P3S
C00010	coa	c	Product		irev	C21H36N7O16P3S	C21H36N7O16P3S
C00010	coa	c	Product		irev	C21H36N7O16P3S	C21H36N7O16P3S
C00010	coa	c	Product		irev	C21H36N7O16P3S	C21H36N7O16P3S
C00010	coa	c	Product	3	irev	C21H36N7O16P3S	C21H36N7O16P3S
C00010	coa	c	Product		irev	C21H36N7O16P3S	C21H36N7O16P3S
C00010	coa	c	Product		irev	C21H36N7O16P3S	C21H36N7O16P3S
C00010	coa	c	Product		irev	C21H36N7O16P3S	C21H36N7O16P3S
C00010	coa	c	Product		irev	C21H36N7O16P3S	C21H36N7O16P3S
C00010	coa	c	reactant		r	C21H36N7O16P3S	C21H36N7O16P3S
C00010	coa	c	reactant		r	C21H36N7O16P3S	C21H36N7O16P3S
C00010	coa	c	reactant		r	C21H36N7O16P3S	C21H36N7O16P3S
C00010	coa	c	reactant		r	C21H36N7O16P3S	C21H36N7O16P3S
C00010	coa	c	reactant		r	C21H36N7O16P3S	C21H36N7O16P3S
C00010	coa	c	reactant		r	C21H36N7O16P3S	C21H36N7O16P3S
C00010	coa	c	reactant		r	C21H36N7O16P3S	C21H36N7O16P3S
C00010	coa	c	reactant		r	C21H36N7O16P3S	C21H36N7O16P3S
C00010	coa	c	reactant		r	C21H36N7O16P3S	C21H36N7O16P3S
C00010	coa	c	reactant		r	C21H36N7O16P3S	C21H36N7O16P3S
C00010	coa	c	reactant		r	C21H36N7O16P3S	C21H36N7O16P3S
C00010	coa	c	reactant		r	C21H36N7O16P3S	C21H36N7O16P3S
C00010	coa	c	Product		irev	C21H36N7O16P3S	C21H36N7O16P3S
C00010	coa	c	Product		r	C21H36N7O16P3S	C21H36N7O16P3S
C00010	coa	m	reactant		irev	C21H36N7O16P3S	C21H36N7O16P3S
C00010	coa	m	reactant	3	irev	C21H36N7O16P3S	C21H36N7O16P3S
C00010	coa	m	reactant		irev	C21H36N7O16P3S	C21H36N7O16P3S
C00010	coa	m	reactant		irev	C21H36N7O16P3S	C21H36N7O16P3S
C00010	coa	m	reactant		irev	C21H36N7O16P3S	C21H36N7O16P3S
C00010	coa	m	reactant		irev	C21H36N7O16P3S	C21H36N7O16P3S
C00010	coa	m	reactant		irev	C21H36N7O16P3S	C21H36N7O16P3S
C00010	coa	m	reactant	3	irev	C21H36N7O16P3S	C21H36N7O16P3S
C00010	coa	m	reactant	6	irev	C21H36N7O16P3S	C21H36N7O16P3S
C00010	coa	m	reactant	6	irev	C21H36N7O16P3S	C21H36N7O16P3S
C00010	coa	m	reactant	7	irev	C21H36N7O16P3S	C21H36N7O16P3S
C00010	coa	m	reactant	7	irev	C21H36N7O16P3S	C21H36N7O16P3S
C00010	coa	m	reactant	8	irev	C21H36N7O16P3S	C21H36N7O16P3S
C00010	coa	m	reactant	8	irev	C21H36N7O16P3S	C21H36N7O16P3S
C00010	coa	m	reactant	8	irev	C21H36N7O16P3S	C21H36N7O16P3S
C00010	coa	m	reactant	8	irev	C21H36N7O16P3S	C21H36N7O16P3S
C00010	coa	m	reactant	8	irev	C21H36N7O16P3S	C21H36N7O16P3S
C00010	coa	m	Product		irev	C21H36N7O16P3S	C21H36N7O16P3S
C00010	coa	m	Product		irev	C21H36N7O16P3S	C21H36N7O16P3S
C00010	coa	m	Product		irev	C21H36N7O16P3S	C21H36N7O16P3S
C00010	coa	m	Product		irev	C21H36N7O16P3S	C21H36N7O16P3S
C00010	coa	m	Product		irev	C21H36N7O16P3S	C21H36N7O16P3S
C00010	coa	m	Product		irev	C21H36N7O16P3S	C21H36N7O16P3S
C00010	coa	m	Product		irev	C21H36N7O16P3S	C21H36N7O16P3S
C00010	coa	m	reactant		r	C21H36N7O16P3S	C21H36N7O16P3S
C00010	coa	m	reactant		r	C21H36N7O16P3S	C21H36N7O16P3S
C00010	coa	m	reactant		r	C21H36N7O16P3S	C21H36N7O16P3S
C00010	coa	m	reactant		r	C21H36N7O16P3S	C21H36N7O16P3S
C00010	coa	m	reactant		r	C21H36N7O16P3S	C21H36N7O16P3S
C00010	coa	m	reactant		r	C21H36N7O16P3S	C21H36N7O16P3S
C00010	coa	m	reactant		r	C21H36N7O16P3S	C21H36N7O16P3S
C00010	coa	m	reactant		r	C21H36N7O16P3S	C21H36N7O16P3S
C00010	coa	m	reactant		r	C21H36N7O16P3S	C21H36N7O16P3S
C00010	coa	m	reactant		r	C21H36N7O16P3S	C21H36N7O16P3S
C00010	coa	m	reactant		r	C21H36N7O16P3S	C21H36N7O16P3S
C00010	coa	m	reactant		r	C21H36N7O16P3S	C21H36N7O16P3S
C00010	coa	c	Product		r	C21H36N7O16P3S	C21H36N7O16P3S
C00010	coa	m	Product		r	C21H36N7O16P3S	C21H36N7O16P3S
C00010	coa	c	Product		irev	C21H36N7O16P3S	C21H36N7O16P3S
C00010	coa	c	Product		irev	C21H36N7O16P3S	C21H36N7O16P3S
C00010	coa	c	Product		irev	C21H36N7O16P3S	C21H36N7O16P3S
C00010	coa	c	Product		irev	C21H36N7O16P3S	C21H36N7O16P3S
C00010	coa	c	Product		irev	C21H36N7O16P3S	C21H36N7O16P3S
C00010	coa	c	reactant		irev	C21H36N7O16P3S	C21H36N7O16P3S
C00010	coa	m	Product		r	C21H36N7O16P3S	C21H36N7O16P3S
C00010	coa	x	Product		irev	C21H36N7O16P3S	C21H36N7O16P3S
C00010	coa	x	reactant		r	C21H36N7O16P3S	C21H36N7O16P3S
C00010	coa	m	Product		irev	C21H36N7O16P3S	C21H36N7O16P3S
C00010	coa	c	reactant		irev	C21H36N7O16P3S	C21H36N7O16P3S
C00010	coa	c	Product		irev	C21H36N7O16P3S	C21H36N7O16P3S
C00010	coa	m	Product		irev	C21H36N7O16P3S	C21H36N7O16P3S
C00010	coa	c	reactant		r	C21H36N7O16P3S	C21H36N7O16P3S
C00010	coa	c	reactant		r	C21H36N7O16P3S	C21H36N7O16P3S
C00010	coa	c	reactant		irev	C21H36N7O16P3S	C21H36N7O16P3S
C00010	coa	c	reactant		r	C21H36N7O16P3S	C21H36N7O16P3S
C00010	coa	c	reactant		irev	C21H36N7O16P3S	C21H36N7O16P3S
C00010	coa	m	Product		irev	C21H36N7O16P3S	C21H36N7O16P3S
C00010	coa	c	Product		irev	C21H36N7O16P3S	C21H36N7O16P3S
C00010	coa	c	Product		irev	C21H36N7O16P3S	C21H36N7O16P3S
C00010	coa	c	Product		irev	C21H36N7O16P3S	C21H36N7O16P3S
C00010	coa	c	Product		irev	C21H36N7O16P3S	C21H36N7O16P3S
C00010	coa	c	Product		irev	C21H36N7O16P3S	C21H36N7O16P3S
C00010	coa	c	Product		irev	C21H36N7O16P3S	C21H36N7O16P3S
C00010	coa	c	Product		irev	C21H36N7O16P3S	C21H36N7O16P3S
C00010	coa	c	Product		irev	C21H36N7O16P3S	C21H36N7O16P3S
C00010	coa	m	Product		irev	C21H36N7O16P3S	C21H36N7O16P3S
C00010	coa	m	Product		irev	C21H36N7O16P3S	C21H36N7O16P3S
C00010	coa	m	reactant		r	C21H36N7O16P3S	C21H36N7O16P3S
C00010	coa	m	Product		r	C21H36N7O16P3S	C21H36N7O16P3S
C00010	coa	c	Product		irev	C21H36N7O16P3S	C21H36N7O16P3S
C00010	coa	c	reactant		irev	C21H36N7O16P3S	C21H36N7O16P3S
C00010	coa	c	reactant		irev	C21H36N7O16P3S	C21H36N7O16P3S
C00010	coa	c	reactant		irev	C21H36N7O16P3S	C21H36N7O16P3S
C00010	coa	c	reactant		irev	C21H36N7O16P3S	C21H36N7O16P3S
C00010	coa	c	reactant		irev	C21H36N7O16P3S	C21H36N7O16P3S
C00010	coa	c	Product		irev	C21H36N7O16P3S	C21H36N7O16P3S
C00010	coa	c	reactant		irev	C21H36N7O16P3S	C21H36N7O16P3S
C00011	co2	c	Product	2	irev	CO2	CO2
C00011	co2	c	Product		irev	CO2	CO2
C00011	co2	c	Product		irev	CO2	CO2
C00011	co2	c	Product		irev	CO2	CO2
C00011	co2	c	Product		irev	CO2	CO2
C00011	co2	c	Product	3	irev	CO2	CO2
C00011	co2	c	Product	3	irev	CO2	CO2
C00011	co2	c	Product		irev	CO2	CO2
C00011	co2	c	Product		irev	CO2	CO2
C00011	co2	c	Product		irev	CO2	CO2
C00011	co2	c	Product		irev	CO2	CO2
C00011	co2	c	Product		irev	CO2	CO2
C00011	co2	c	Product		irev	CO2	CO2
C00011	co2	c	Product		irev	CO2	CO2
C00011	co2	c	Product		irev	CO2	CO2
C00011	co2	c	Product		irev	CO2	CO2
C00011	co2	c	Product		irev	CO2	CO2
C00011	co2	c	Product	3	irev	CO2	CO2
C00011	co2	c	Product		irev	CO2	CO2
C00011	co2	c	Product		irev	CO2	CO2
C00011	co2	c	Product		irev	CO2	CO2
C00011	co2	c	Product		irev	CO2	CO2
C00011	co2	c	Product	3	irev	CO2	CO2
C00011	co2	c	Product		irev	CO2	CO2
C00011	co2	c	Product		irev	CO2	CO2
C00011	co2	c	Product		irev	CO2	CO2
C00011	co2	c	Product		irev	CO2	CO2
C00011	co2	c	Product		irev	CO2	CO2
C00011	co2	c	Product		irev	CO2	CO2
C00011	co2	c	Product		irev	CO2	CO2
C00011	co2	c	Product		irev	CO2	CO2
C00011	co2	c	Product		irev	CO2	CO2
C00011	co2	m	Product		r	CO2	CO2
C00011	co2	c	Product		irev	CO2	CO2
C00011	co2	c	Product		irev	CO2	CO2
C00011	co2	c	Product		irev	CO2	CO2
C00011	co2	c	Product		irev	CO2	CO2
C00011	co2	m	Product		r	CO2	CO2
C00011	co2	m	Product		irev	CO2	CO2
C00011	co2	c	Product		irev	CO2	CO2
C00011	co2	c	Product		irev	CO2	CO2
C00011	co2	c	Product		r	CO2	CO2
C00011	co2	m	reactant		irev	CO2	CO2
C00011	co2	c	Product		irev	CO2	CO2
C00011	co2	c	Product		irev	CO2	CO2
C00011	co2	c	Product		irev	CO2	CO2
C00011	co2	c	Product		irev	CO2	CO2
C00011	co2	c	Product		r	CO2	CO2
C00011	co2	c	Product		r	CO2	CO2
C00011	co2	c	Product		r	CO2	CO2
C00011	co2	c	Product		irev	CO2	CO2
C00011	co2	c	Product		r	CO2	CO2
C00011	co2	c	Product	4	irev	CO2	CO2
C00011	co2	c	Product	2	irev	CO2	CO2
C00011	co2	m	Product		irev	CO2	CO2
C00011	co2	c	Product		r	CO2	CO2
C00011	co2	c	Product		irev	CO2	CO2
C00011	co2	m	Product		irev	CO2	CO2
C00011	co2	c	Product		irev	CO2	CO2
C00011	co2	c	Product		irev	CO2	CO2
C00011	co2	c	Product		irev	CO2	CO2
C00011	co2	c	Product		irev	CO2	CO2
C00011	co2	c	Product		irev	CO2	CO2
C00011	co2	m	Product		irev	CO2	CO2
C00011	co2	m	Product		irev	CO2	CO2
C00011	co2	m	Product		irev	CO2	CO2
C00011	co2	c	Product		irev	CO2	CO2
C00011	co2	c	Product		irev	CO2	CO2
C00011	co2	c	Product		irev	CO2	CO2
C00011	co2	c	Product		irev	CO2	CO2
C00011	co2	m	Product		irev	CO2	CO2
C00011	co2	c	Product		irev	CO2	CO2
C00011	co2	c	Product		irev	CO2	CO2
C00011	co2	c	Product		irev	CO2	CO2
C00011	co2	c	Product		irev	CO2	CO2
C00011	co2	c	Product		irev	CO2	CO2
C00011	co2	m	Product		irev	CO2	CO2
C00013	ppi	c	Product		irev	H4P2O7	H4O7P2	1
C00013	ppi	c	Product		irev	H4P2O7	H4O7P2	1
C00013	ppi	c	Product		r	H4P2O7	H4O7P2	1
C00013	ppi	c	Product		irev	H4P2O7	H4O7P2	1
C00013	ppi	c	Product		r	H4P2O7	H4O7P2	1
C00013	ppi	c	Product		r	H4P2O7	H4O7P2	1
C00013	ppi	c	Product		r	H4P2O7	H4O7P2	1
C00013	ppi	c	Product		r	H4P2O7	H4O7P2	1
C00013	ppi	c	Product		r	H4P2O7	H4O7P2	1
C00013	ppi	c	Product		r	H4P2O7	H4O7P2	1
C00013	ppi	c	Product		r	H4P2O7	H4O7P2	1
C00013	ppi	c	Product		r	H4P2O7	H4O7P2	1
C00013	ppi	c	Product		r	H4P2O7	H4O7P2	1
C00013	ppi	c	Product		r	H4P2O7	H4O7P2	1
C00013	ppi	c	Product		r	H4P2O7	H4O7P2	1
C00013	ppi	c	Product		r	H4P2O7	H4O7P2	1
C00013	ppi	c	Product		r	H4P2O7	H4O7P2	1
C00013	ppi	m	Product		r	H4P2O7	H4O7P2	1
C00013	ppi	m	Product		r	H4P2O7	H4O7P2	1
C00013	ppi	m	Product		r	H4P2O7	H4O7P2	1
C00013	ppi	m	Product		r	H4P2O7	H4O7P2	1
C00013	ppi	m	Product		r	H4P2O7	H4O7P2	1
C00013	ppi	m	Product		r	H4P2O7	H4O7P2	1
C00013	ppi	m	Product		r	H4P2O7	H4O7P2	1
C00013	ppi	m	Product		r	H4P2O7	H4O7P2	1
C00013	ppi	m	Product		r	H4P2O7	H4O7P2	1
C00013	ppi	m	Product		r	H4P2O7	H4O7P2	1
C00013	ppi	m	Product		r	H4P2O7	H4O7P2	1
C00013	ppi	m	Product		r	H4P2O7	H4O7P2	1
C00013	ppi	m	Product		irev	H4P2O7	H4O7P2	1
C00013	ppi	c	Product		irev	H4P2O7	H4O7P2	1
C00013	ppi	c	Product		irev	H4P2O7	H4O7P2	1
C00013	ppi	c	Product		irev	H4P2O7	H4O7P2	1
C00013	ppi	c	Product		r	H4P2O7	H4O7P2	1
C00013	ppi	c	Product		irev	H4P2O7	H4O7P2	1
C00013	ppi	c	Product		irev	H4P2O7	H4O7P2	1
C00013	ppi	c	Product		irev	H4P2O7	H4O7P2	1
C00013	ppi	c	reactant		irev	H4P2O7	H4O7P2	1
C00013	ppi	m	reactant		irev	H4P2O7	H4O7P2	1
C00013	ppi	m	Product		irev	H4P2O7	H4O7P2	1
C00013	ppi	c	Product		irev	H4P2O7	H4O7P2	1
C00013	ppi	c	Product		irev	H4P2O7	H4O7P2	1
C00013	ppi	m	Product		irev	H4P2O7	H4O7P2	1
C00013	ppi	c	Product		irev	H4P2O7	H4O7P2	1
C00013	ppi	c	Product		irev	H4P2O7	H4O7P2	1
C00013	ppi	c	Product		r	H4P2O7	H4O7P2	1
C00013	ppi	c	Product		irev	H4P2O7	H4O7P2	1
C00013	ppi	c	Product		irev	H4P2O7	H4O7P2	1
C00013	ppi	c	Product		irev	H4P2O7	H4O7P2	1
C00013	ppi	c	Product		irev	H4P2O7	H4O7P2	1
C00013	ppi	c	reactant		r	H4P2O7	H4O7P2	1
C00013	ppi	c	Product		irev	H4P2O7	H4O7P2	1
C00013	ppi	c	Product		irev	H4P2O7	H4O7P2	1
C00013	ppi	c	Product		irev	H4P2O7	H4O7P2	1
C00013	ppi	c	Product		irev	H4P2O7	H4O7P2	1
C00013	ppi	c	reactant		r	H4P2O7	H4O7P2	1
C00013	ppi	c	Product		r	H4P2O7	H4O7P2	1
C00013	ppi	c	reactant		r	H4P2O7	H4O7P2	1
C00013	ppi	c	Product		irev	H4P2O7	H4O7P2	1
C00013	ppi	c	Product		irev	H4P2O7	H4O7P2	1
C00013	ppi	c	Product		irev	H4P2O7	H4O7P2	1
C00013	ppi	c	Product		irev	H4P2O7	H4O7P2	1
C00013	ppi	c	Product		irev	H4P2O7	H4O7P2	1
C00013	ppi	c	Product	2	irev	H4P2O7	H4O7P2	1
C00013	ppi	c	Product		irev	H4P2O7	H4O7P2	1
C00013	ppi	c	Product		irev	H4P2O7	H4O7P2	1
C00013	ppi	c	Product		irev	H4P2O7	H4O7P2	1
C00013	ppi	c	Product		irev	H4P2O7	H4O7P2	1
C00013	ppi	c	Product	3	irev	H4P2O7	H4O7P2	1
C00013	ppi	c	Product	2	irev	H4P2O7	H4O7P2	1
C00013	ppi	c	Product		irev	H4P2O7	H4O7P2	1
C00013	ppi	c	Product		irev	H4P2O7	H4O7P2	1
C00013	ppi	m	Product		irev	H4P2O7	H4O7P2	1
C00013	ppi	m	Product		irev	H4P2O7	H4O7P2	1
C00013	ppi	m	Product		irev	H4P2O7	H4O7P2	1
C00013	ppi	c	Product		irev	H4P2O7	H4O7P2	1
C00013	ppi	c	Product		irev	H4P2O7	H4O7P2	1
C00013	ppi	c	Product		irev	H4P2O7	H4O7P2	1
C00013	ppi	m	Product		irev	H4P2O7	H4O7P2	1
C00014	nh4	c	Product		r	NH3	H3N	1	NH3
C00014	nh4	c	Product		r	NH3	H3N	1
C00014	nh4	c	reactant		irev	NH3	H3N	1
C00014	nh4	c	Product		irev	NH3	H3N	1
C00014	nh4	c	Product	2	irev	NH3	H3N	1
C00014	nh4	c	Product		irev	NH3	H3N	1
C00014	nh4	c	Product		r	NH3	H3N	1
C00014	nh4	c	Product		r	NH3	H3N	1
C00014	nh4	c	Product		irev	NH3	H3N	1
C00014	nh4	c	Product		r	NH3	H3N	1
C00014	nh4	c	Product		irev	NH3	H3N	1
C00014	nh4	c	Product		irev	NH3	H3N	1
C00014	nh4	c	Product		r	NH3	H3N	1
C00014	nh4	m	Product		r	NH3	H3N	1
C00014	nh4	c	Product		irev	NH3	H3N	1
C00014	nh4	m	reactant		irev	NH3	H3N	1
C00014	nh4	c	Product		irev	NH3	H3N	1
C00014	nh4	c	Product		r	NH3	H3N	1
C00014	nh4	c	Product		r	NH3	H3N	1
C00014	nh4	c	Product	2	r	NH3	H3N	1
C00014	nh4	c	Product		irev	NH3	H3N	1
C00014	nh4	c	Product		irev	NH3	H3N	1
C00014	nh4	c	Product	4	irev	NH3	H3N	1
C00014	nh4	c	Product		irev	NH3	H3N	1
C00014	nh4	c	Product		r	NH3	H3N	1
C00014	nh4	c	Product		irev	NH3	H3N	1
C00014	nh4	c	Product		irev	NH3	H3N	1
C00014	nh4	c	reactant		irev	NH3	H3N	1
C00014	nh4	c	Product		irev	NH3	H3N	1
C00014	nh4	c	Product		irev	NH3	H3N	1
C00014	nh4	c	Product		r	NH3	H3N	1
C00014	nh4	c	Product		irev	NH3	H3N	1
C00014	nh4	c	Product		irev	NH3	H3N	1
C00014	nh4	c	Product		irev	NH3	H3N	1
C00015	udp	c	Product		irev	C9H14N2O12P2	C9H14N2O12P2
C00015	udp	c	reactant		irev	C9H14N2O12P2	C9H14N2O12P2
C00015	udp	c	Product		irev	C9H14N2O12P2	C9H14N2O12P2
C00015	udp	c	Product		irev	C9H14N2O12P2	C9H14N2O12P2
C00015	udp	c	Product		r	C9H14N2O12P2	C9H14N2O12P2
C00015	udp	c	reactant		r	C9H14N2O12P2	C9H14N2O12P2
C00015	udp	c	reactant		irev	C9H14N2O12P2	C9H14N2O12P2
C00015	udp	c	Product		irev	C9H14N2O12P2	C9H14N2O12P2
C00015	udp	c	Product		irev	C9H14N2O12P2	C9H14N2O12P2
C00015	udp	c	Product		irev	C9H14N2O12P2	C9H14N2O12P2
C00015	udp	c	Product		irev	C9H14N2O12P2	C9H14N2O12P2
C00016	fad	m	reactant		irev	C27H33N9O15P2	C27H33N9O15P2
C00016	fad	m	reactant		irev	C27H33N9O15P2	C27H33N9O15P2
C00016	fad	c	Product		irev	C27H33N9O15P2	C27H33N9O15P2
C00016	fad	m	reactant		r	C27H33N9O15P2	C27H33N9O15P2
C00016	fad	c	reactant		irev	C27H33N9O15P2	C27H33N9O15P2
C00016	fad	c	reactant		r	C27H33N9O15P2	C27H33N9O15P2
C00016	fad	c	reactant		r	C27H33N9O15P2	C27H33N9O15P2
C00018	pydx5p	c	Product		irev	C8H10NO6P	C8H10NO6P
C00018	pydx5p	c	Product		irev	C8H10NO6P	C8H10NO6P
C00018	pydx5p	c	Product		irev	C8H10NO6P	C8H10NO6P
C00018	pydx5p	c	Product		irev	C8H10NO6P	C8H10NO6P
C00019	amet	c	Product		irev	C15H22N6O5S	C15H23N6O5S	1
C00019	amet	c	reactant		irev	C15H22N6O5S	C15H23N6O5S	1
C00019	amet	c	reactant		irev	C15H22N6O5S	C15H23N6O5S	1
C00019	amet	c	reactant		irev	C15H22N6O5S	C15H23N6O5S	1
C00019	amet	c	reactant		irev	C15H22N6O5S	C15H23N6O5S	1
C00019	amet	c	reactant		irev	C15H22N6O5S	C15H23N6O5S	1
C00019	amet	c	reactant	2	irev	C15H22N6O5S	C15H23N6O5S	1
C00019	amet	c	reactant		irev	C15H22N6O5S	C15H23N6O5S	1
C00019	amet	c	reactant		irev	C15H22N6O5S	C15H23N6O5S	1
C00019	amet	m	reactant		irev	C15H22N6O5S	C15H23N6O5S	1
C00019	amet	m	reactant		irev	C15H22N6O5S	C15H23N6O5S	1
C00019	amet	m	reactant		irev	C15H22N6O5S	C15H23N6O5S	1
C00020	amp	c	Product		irev	C10H14N5O7P	C10H14N5O7P
C00020	amp	c	Product		r	C10H14N5O7P	C10H14N5O7P
C00020	amp	c	Product		r	C10H14N5O7P	C10H14N5O7P
C00020	amp	c	Product		r	C10H14N5O7P	C10H14N5O7P
C00020	amp	c	Product		r	C10H14N5O7P	C10H14N5O7P
C00020	amp	c	Product		r	C10H14N5O7P	C10H14N5O7P
C00020	amp	c	Product		r	C10H14N5O7P	C10H14N5O7P
C00020	amp	c	Product		r	C10H14N5O7P	C10H14N5O7P
C00020	amp	c	Product		r	C10H14N5O7P	C10H14N5O7P
C00020	amp	c	Product		r	C10H14N5O7P	C10H14N5O7P
C00020	amp	c	Product		r	C10H14N5O7P	C10H14N5O7P
C00020	amp	c	Product		r	C10H14N5O7P	C10H14N5O7P
C00020	amp	c	Product		r	C10H14N5O7P	C10H14N5O7P
C00020	amp	c	Product		r	C10H14N5O7P	C10H14N5O7P
C00020	amp	m	Product		r	C10H14N5O7P	C10H14N5O7P
C00020	amp	m	Product		r	C10H14N5O7P	C10H14N5O7P
C00020	amp	m	Product		r	C10H14N5O7P	C10H14N5O7P
C00020	amp	m	Product		r	C10H14N5O7P	C10H14N5O7P
C00020	amp	m	Product		r	C10H14N5O7P	C10H14N5O7P
C00020	amp	m	Product		r	C10H14N5O7P	C10H14N5O7P
C00020	amp	m	Product		r	C10H14N5O7P	C10H14N5O7P
C00020	amp	m	Product		r	C10H14N5O7P	C10H14N5O7P
C00020	amp	m	Product		r	C10H14N5O7P	C10H14N5O7P
C00020	amp	m	Product		r	C10H14N5O7P	C10H14N5O7P
C00020	amp	m	Product		r	C10H14N5O7P	C10H14N5O7P
C00020	amp	m	Product		r	C10H14N5O7P	C10H14N5O7P
C00020	amp	m	Product		irev	C10H14N5O7P	C10H14N5O7P
C00020	amp	c	Product		irev	C10H14N5O7P	C10H14N5O7P
C00020	amp	c	Product		irev	C10H14N5O7P	C10H14N5O7P
C00020	amp	c	Product		irev	C10H14N5O7P	C10H14N5O7P
C00020	amp	c	Product		irev	C10H14N5O7P	C10H14N5O7P
C00020	amp	c	Product		r	C10H14N5O7P	C10H14N5O7P
C00020	amp	c	reactant		r	C10H14N5O7P	C10H14N5O7P
C00020	amp	c	Product		r	C10H14N5O7P	C10H14N5O7P
C00020	amp	c	reactant		irev	C10H14N5O7P	C10H14N5O7P
C00020	amp	c	Product		irev	C10H14N5O7P	C10H14N5O7P
C00020	amp	c	reactant		irev	C10H14N5O7P	C10H14N5O7P
C00020	amp	c	Product		irev	C10H14N5O7P	C10H14N5O7P
C00020	amp	c	Product		irev	C10H14N5O7P	C10H14N5O7P
C00020	amp	c	Product		irev	C10H14N5O7P	C10H14N5O7P
C00020	amp	c	Product		r	C10H14N5O7P	C10H14N5O7P
C00020	amp	c	Product		r	C10H14N5O7P	C10H14N5O7P
C00020	amp	c	Product		irev	C10H14N5O7P	C10H14N5O7P
C00020	amp	c	Product		irev	C10H14N5O7P	C10H14N5O7P
C00020	amp	c	Product		irev	C10H14N5O7P	C10H14N5O7P
C00020	amp	m	Product		irev	C10H14N5O7P	C10H14N5O7P
C00020	amp	m	Product		irev	C10H14N5O7P	C10H14N5O7P
C00020	amp	m	Product		irev	C10H14N5O7P	C10H14N5O7P
C00020	amp	c	Product		irev	C10H14N5O7P	C10H14N5O7P
C00020	amp	c	Product		irev	C10H14N5O7P	C10H14N5O7P
C00020	amp	c	Product		irev	C10H14N5O7P	C10H14N5O7P
C00021	ahcys	c	reactant		irev	C14H20N6O5S	C14H20N6O5S
C00021	ahcys	c	Product		irev	C14H20N6O5S	C14H20N6O5S
C00021	ahcys	c	Product		irev	C14H20N6O5S	C14H20N6O5S
C00021	ahcys	c	Product		irev	C14H20N6O5S	C14H20N6O5S
C00021	ahcys	c	Product		irev	C14H20N6O5S	C14H20N6O5S
C00021	ahcys	c	Product	2	irev	C14H20N6O5S	C14H20N6O5S
C00021	ahcys	c	Product		irev	C14H20N6O5S	C14H20N6O5S
C00021	ahcys	c	Product		irev	C14H20N6O5S	C14H20N6O5S
C00021	ahcys	m	Product		irev	C14H20N6O5S	C14H20N6O5S
C00021	ahcys	m	Product		irev	C14H20N6O5S	C14H20N6O5S
C00021	ahcys	m	Product		irev	C14H20N6O5S	C14H20N6O5S
C00022	pyr	c	Product		r	C3H4O3	C3H4O3
C00022	pyr	c	Product		r	C3H4O3	C3H4O3
C00022	pyr	c	Product		r	C3H4O3	C3H4O3
C00022	pyr	c	Product		irev	C3H4O3	C3H4O3
C00022	pyr	c	Product		irev	C3H4O3	C3H4O3
C00022	pyr	c	Product		irev	C3H4O3	C3H4O3
C00022	pyr	c	Product		irev	C3H4O3	C3H4O3
C00022	pyr	c	Product		r	C3H4O3	C3H4O3
C00022	pyr	c	reactant		r	C3H4O3	C3H4O3
C00022	pyr	c	reactant		irev	C3H4O3	C3H4O3
C00022	pyr	c	Product		irev	C3H4O3	C3H4O3
C00022	pyr	c	Product		irev	C3H4O3	C3H4O3
C00022	pyr	m	Product		irev	C3H4O3	C3H4O3
C00022	pyr	m	Product		irev	C3H4O3	C3H4O3
C00022	pyr	m	Product		irev	C3H4O3	C3H4O3
C00022	pyr	c	reactant		irev	C3H4O3	C3H4O3
C00022	pyr	c	reactant		irev	C3H4O3	C3H4O3
C00022	pyr	m	reactant		irev	C3H4O3	C3H4O3
C00022	pyr	m	Product		irev	C3H4O3	C3H4O3
C00024	accoa	c	reactant		irev	C23H38N7O17P3S	C23H38N7O17P3S
C00024	accoa	m	reactant		irev	C23H38N7O17P3S	C23H38N7O17P3S
C00024	accoa	c	reactant		irev	C23H38N7O17P3S	C23H38N7O17P3S
C00024	accoa	c	reactant		irev	C23H38N7O17P3S	C23H38N7O17P3S
C00024	accoa	c	reactant		irev	C23H38N7O17P3S	C23H38N7O17P3S
C00024	accoa	c	reactant		irev	C23H38N7O17P3S	C23H38N7O17P3S
C00024	accoa	c	reactant		r	C23H38N7O17P3S	C23H38N7O17P3S
C00024	accoa	m	Product		irev	C23H38N7O17P3S	C23H38N7O17P3S
C00024	accoa	m	Product	3	irev	C23H38N7O17P3S	C23H38N7O17P3S
C00024	accoa	m	Product		irev	C23H38N7O17P3S	C23H38N7O17P3S
C00024	accoa	m	Product		irev	C23H38N7O17P3S	C23H38N7O17P3S
C00024	accoa	m	Product		irev	C23H38N7O17P3S	C23H38N7O17P3S
C00024	accoa	m	Product		irev	C23H38N7O17P3S	C23H38N7O17P3S
C00024	accoa	m	Product		irev	C23H38N7O17P3S	C23H38N7O17P3S
C00024	accoa	m	Product	4	irev	C23H38N7O17P3S	C23H38N7O17P3S
C00024	accoa	m	Product	7	irev	C23H38N7O17P3S	C23H38N7O17P3S
C00024	accoa	m	Product	7	irev	C23H38N7O17P3S	C23H38N7O17P3S
C00024	accoa	m	Product	8	irev	C23H38N7O17P3S	C23H38N7O17P3S
C00024	accoa	m	Product	8	irev	C23H38N7O17P3S	C23H38N7O17P3S
C00024	accoa	m	Product	9	irev	C23H38N7O17P3S	C23H38N7O17P3S
C00024	accoa	m	Product	9	irev	C23H38N7O17P3S	C23H38N7O17P3S
C00024	accoa	m	Product	9	irev	C23H38N7O17P3S	C23H38N7O17P3S
C00024	accoa	m	Product	9	irev	C23H38N7O17P3S	C23H38N7O17P3S
C00024	accoa	m	Product	9	irev	C23H38N7O17P3S	C23H38N7O17P3S
C00024	accoa	c	reactant		r	C23H38N7O17P3S	C23H38N7O17P3S
C00024	accoa	m	reactant		r	C23H38N7O17P3S	C23H38N7O17P3S
C00024	accoa	c	Product		irev	C23H38N7O17P3S	C23H38N7O17P3S
C00024	accoa	m	reactant		r	C23H38N7O17P3S	C23H38N7O17P3S
C00024	accoa	x	reactant		irev	C23H38N7O17P3S	C23H38N7O17P3S
C00024	accoa	x	Product		r	C23H38N7O17P3S	C23H38N7O17P3S
C00024	accoa	m	reactant		irev	C23H38N7O17P3S	C23H38N7O17P3S
C00024	accoa	c	Product		irev	C23H38N7O17P3S	C23H38N7O17P3S
C00024	accoa	c	Product		irev	C23H38N7O17P3S	C23H38N7O17P3S
C00024	accoa	m	reactant		irev	C23H38N7O17P3S	C23H38N7O17P3S
C00024	accoa	c	reactant	2	irev	C23H38N7O17P3S	C23H38N7O17P3S
C00024	accoa	c	reactant		irev	C23H38N7O17P3S	C23H38N7O17P3S
C00024	accoa	m	reactant	2	irev	C23H38N7O17P3S	C23H38N7O17P3S
C00024	accoa	c	Product		irev	C23H38N7O17P3S	C23H38N7O17P3S
C00024	accoa	m	reactant		irev	C23H38N7O17P3S	C23H38N7O17P3S
C00024	accoa	c	reactant		irev	C23H38N7O17P3S	C23H38N7O17P3S
C00024	accoa	c	Product		irev	C23H38N7O17P3S	C23H38N7O17P3S
C00025	glu-L	c	Product	2	irev	C5H9NO4	C5H9NO4		C5H9NO4
C00025	glu-L	c	Product	2	irev	C5H9NO4	C5H9NO4		C5H9NO4
C00025	glu-L	c	reactant		r	C5H9NO4	C5H9NO4		C5H9NO4
C00025	glu-L	c	reactant		r	C5H9NO4	C5H9NO4
C00025	glu-L	c	reactant		irev	C5H9NO4	C5H9NO4
C00025	glu-L	c	Product		r	C5H9NO4	C5H9NO4
C00025	glu-L	c	Product		r	C5H9NO4	C5H9NO4
C00025	glu-L	c	Product		irev	C5H9NO4	C5H9NO4
C00025	glu-L	c	Product		irev	C5H9NO4	C5H9NO4
C00025	glu-L	c	Product		irev	C5H9NO4	C5H9NO4
C00025	glu-L	c	Product		irev	C5H9NO4	C5H9NO4
C00025	glu-L	c	reactant		irev	C5H9NO4	C5H9NO4
C00025	glu-L	m	Product		irev	C5H9NO4	C5H9NO4
C00025	glu-L	m	reactant		irev	C5H9NO4	C5H9NO4
C00025	glu-L	c	Product		irev	C5H9NO4	C5H9NO4
C00025	glu-L	m	reactant		r	C5H9NO4	C5H9NO4
C00025	glu-L	m	reactant		irev	C5H9NO4	C5H9NO4
C00025	glu-L	c	Product		irev	C5H9NO4	C5H9NO4
C00025	glu-L	c	Product		r	C5H9NO4	C5H9NO4
C00025	glu-L	c	Product		irev	C5H9NO4	C5H9NO4
C00025	glu-L	c	reactant		irev	C5H9NO4	C5H9NO4
C00025	glu-L	c	reactant		irev	C5H9NO4	C5H9NO4
C00025	glu-L	c	Product		r	C5H9NO4	C5H9NO4
C00025	glu-L	c	Product		irev	C5H9NO4	C5H9NO4
C00025	glu-L	c	reactant		r	C5H9NO4	C5H9NO4
C00025	glu-L	c	reactant		irev	C5H9NO4	C5H9NO4
C00025	glu-L	c	Product		r	C5H9NO4	C5H9NO4
C00025	glu-L	c	Product		irev	C5H9NO4	C5H9NO4
C00025	glu-L	c	Product		irev	C5H9NO4	C5H9NO4
C00025	glu-L	c	reactant		irev	C5H9NO4	C5H9NO4
C00025	glu-L	c	Product		r	C5H9NO4	C5H9NO4
C00025	glu-L	c	Product		irev	C5H9NO4	C5H9NO4
C00025	glu-L	c	Product		r	C5H9NO4	C5H9NO4
C00025	glu-L	c	Product		r	C5H9NO4	C5H9NO4
C00025	glu-L	c	Product		irev	C5H9NO4	C5H9NO4
C00025	glu-L	c	Product		irev	C5H9NO4	C5H9NO4
C00025	glu-L	c	Product		irev	C5H9NO4	C5H9NO4
C00025	glu-L	c	Product		irev	C5H9NO4	C5H9NO4
C00025	glu-L	c	Product		r	C5H9NO4	C5H9NO4
C00025	glu-L	c	Product		r	C5H9NO4	C5H9NO4
C00025	glu-L	c	Product		irev	C5H9NO4	C5H9NO4
C00025	glu-L	c	Product		r	C5H9NO4	C5H9NO4
C00025	glu-L	c	Product		irev	C5H9NO4	C5H9NO4
C00025	glu-L	c	Product		irev	C5H9NO4	C5H9NO4
C00025	glu-L	c	Product		r	C5H9NO4	C5H9NO4
C00025	glu-L	c	Product		irev	C5H9NO4	C5H9NO4
C00025	glu-L	c	Product		irev	C5H9NO4	C5H9NO4
C00025	glu-L	c	Product		r	C5H9NO4	C5H9NO4
C00025	glu-L	c	Product		r	C5H9NO4	C5H9NO4
C00025	glu-L	c	Product		r	C5H9NO4	C5H9NO4
C00026	akg	c	reactant		irev	C5H6O5	C5H6O5		C5H6O5
C00026	akg	c	reactant		irev	C5H6O5	C5H6O5		C5H6O5
C00026	akg	c	Product		r	C5H6O5	C5H6O5		C5H6O5
C00026	akg	c	Product		r	C5H6O5	C5H6O5
C00026	akg	c	reactant		r	C5H6O5	C5H6O5
C00026	akg	c	reactant		r	C5H6O5	C5H6O5
C00026	akg	c	reactant		irev	C5H6O5	C5H6O5
C00026	akg	m	Product		irev	C5H6O5	C5H6O5
C00026	akg	c	reactant		r	C5H6O5	C5H6O5
C00026	akg	c	reactant		irev	C5H6O5	C5H6O5
C00026	akg	c	Product		irev	C5H6O5	C5H6O5
C00026	akg	c	reactant		r	C5H6O5	C5H6O5
C00026	akg	c	reactant		r	C5H6O5	C5H6O5
C00026	akg	c	reactant		r	C5H6O5	C5H6O5
C00026	akg	c	Product		r	C5H6O5	C5H6O5
C00026	akg	m	reactant		irev	C5H6O5	C5H6O5
C00026	akg	c	reactant		r	C5H6O5	C5H6O5
C00026	akg	c	reactant		r	C5H6O5	C5H6O5
C00026	akg	c	reactant		r	C5H6O5	C5H6O5
C00026	akg	c	reactant		r	C5H6O5	C5H6O5
C00026	akg	m	Product		irev	C5H6O5	C5H6O5
C00026	akg	m	Product		irev	C5H6O5	C5H6O5
C00026	akg	m	reactant		irev	C5H6O5	C5H6O5
C00026	akg	c	reactant		r	C5H6O5	C5H6O5
C00026	akg	c	reactant		irev	C5H6O5	C5H6O5
C00026	akg	c	reactant		r	C5H6O5	C5H6O5
C00026	akg	c	reactant		r	C5H6O5	C5H6O5
C00026	akg	c	reactant		r	C5H6O5	C5H6O5
C00027	h2o2	c	Product		irev	H2O2	H2O2
C00027	h2o2	c	Product		irev	H2O2	H2O2
C00027	h2o2	m	Product		irev	H2O2	H2O2
C00027	h2o2	m	Product	3	irev	H2O2	H2O2
C00027	h2o2	m	Product		irev	H2O2	H2O2
C00027	h2o2	m	Product		irev	H2O2	H2O2
C00027	h2o2	m	Product		irev	H2O2	H2O2
C00027	h2o2	m	Product		irev	H2O2	H2O2
C00027	h2o2	m	Product		irev	H2O2	H2O2
C00027	h2o2	m	Product	3	irev	H2O2	H2O2
C00027	h2o2	m	Product	6	irev	H2O2	H2O2
C00027	h2o2	m	Product	5	irev	H2O2	H2O2
C00027	h2o2	m	Product	7	irev	H2O2	H2O2
C00027	h2o2	m	Product	6	irev	H2O2	H2O2
C00027	h2o2	m	Product	8	irev	H2O2	H2O2
C00027	h2o2	m	Product	7	irev	H2O2	H2O2
C00027	h2o2	m	Product	8	irev	H2O2	H2O2
C00027	h2o2	m	Product	7	irev	H2O2	H2O2
C00027	h2o2	m	Product	6	irev	H2O2	H2O2
C00027	h2o2	c	Product		irev	H2O2	H2O2
C00027	h2o2	c	reactant		irev	H2O2	H2O2
C00027	h2o2	c	Product		irev	H2O2	H2O2
C00027	h2o2	c	reactant		irev	H2O2	H2O2
C00027	h2o2	c+F2018	Product		r	H2O2	H2O2
C00027	h2o2	c	Product		irev	H2O2	H2O2
C00027	h2o2	m	Product	3	irev	H2O2	H2O2
C00027	h2o2	c	Product		irev	H2O2	H2O2
C00027	h2o2	c	Product		irev	H2O2	H2O2
C00027	h2o2	c	Product		r	H2O2	H2O2
C00027	h2o2	c	Product		r	H2O2	H2O2
C00027	h2o2	c	Product	2	irev	H2O2	H2O2
C00027	h2o2	c	Product		irev	H2O2	H2O2
C00029	udpg	c	Product		r	C15H24N2O17P2	C15H24N2O17P2
C00029	udpg	c	reactant		r	C15H24N2O17P2	C15H24N2O17P2
C00029	udpg	c	reactant		r	C15H24N2O17P2	C15H24N2O17P2
C00029	udpg	c	reactant		r	C15H24N2O17P2	C15H24N2O17P2
C00029	udpg	c	reactant		irev	C15H24N2O17P2	C15H24N2O17P2
C00029	udpg	c	reactant		irev	C15H24N2O17P2	C15H24N2O17P2
C00029	udpg	c	reactant		irev	C15H24N2O17P2	C15H24N2O17P2
C00032	pheme	m	Product		irev	C34H32FeN4O4	C34H32FeN4O4
C00033	ac	c	Product		irev	C2H4O2	C2H4O2
C00033	ac	c	Product		irev	C2H4O2	C2H4O2
C00033	ac	c	Product		irev	C2H4O2	C2H4O2
C00033	ac	c	Product		irev	C2H4O2	C2H4O2
C00033	ac	c	Product		irev	C2H4O2	C2H4O2
C00033	ac	c	Product		irev	C2H4O2	C2H4O2
C00033	ac	c	reactant		irev	C2H4O2	C2H4O2
C00033	ac	m	Product		irev	C2H4O2	C2H4O2
C00033	ac	m	Product		irev	C2H4O2	C2H4O2
C00033	ac	c	reactant		irev	C2H4O2	C2H4O2
C00035	gdp	c	reactant		irev	C10H15N5O11P2	C10H15N5O11P2
C00035	gdp	c	reactant		r	C10H15N5O11P2	C10H15N5O11P2
C00035	gdp	c	Product		r	C10H15N5O11P2	C10H15N5O11P2
C00035	gdp	c	reactant		irev	C10H15N5O11P2	C10H15N5O11P2
C00035	gdp	c	Product		irev	C10H15N5O11P2	C10H15N5O11P2
C00035	gdp	c	Product		irev	C10H15N5O11P2	C10H15N5O11P2
C00035	gdp	c	Product		irev	C10H15N5O11P2	C10H15N5O11P2
C00035	gdp	c	Product		irev	C10H15N5O11P2	C10H15N5O11P2
C00035	gdp	c	Product		irev	C10H15N5O11P2	C10H15N5O11P2
C00035	gdp	c	Product		irev	C10H15N5O11P2	C10H15N5O11P2
C00035	gdp	c	Product		irev	C10H15N5O11P2	C10H15N5O11P2
C00035	gdp	c	Product		irev	C10H15N5O11P2	C10H15N5O11P2
C00035	gdp	c	Product		irev	C10H15N5O11P2	C10H15N5O11P2
C00035	gdp	c	Product		irev	C10H15N5O11P2	C10H15N5O11P2
C00035	gdp	c	Product		irev	C10H15N5O11P2	C10H15N5O11P2
C00036	oaa	c	Product		r	C4H4O5	C4H4O5
C00036	oaa	c	reactant		irev	C4H4O5	C4H4O5
C00036	oaa	x	reactant		irev	C4H4O5	C4H4O5
C00036	oaa	c	Product		r	C4H4O5	C4H4O5
C00036	oaa	m	Product		r	C4H4O5	C4H4O5
C00036	oaa	c	Product		irev	C4H4O5	C4H4O5
C00036	oaa	m	reactant		irev	C4H4O5	C4H4O5
C00037	gly	c	Product		r	C2H5NO2	C2H5NO2
C00037	gly	c	reactant		irev	C2H5NO2	C2H5NO2
C00037	gly	c	Product		r	C2H5NO2	C2H5NO2
C00037	gly	c	reactant		r	C2H5NO2	C2H5NO2
C00037	gly	m	reactant		r	C2H5NO2	C2H5NO2
C00037	gly	c	Product		r	C2H5NO2	C2H5NO2
C00037	gly	c	Product		r	C2H5NO2	C2H5NO2
C00037	gly	c	Product		r	C2H5NO2	C2H5NO2
C00037	gly	c	reactant		irev	C2H5NO2	C2H5NO2
C00037	gly	m	Product		irev	C2H5NO2	C2H5NO2
C00037	gly	c	reactant		irev	C2H5NO2	C2H5NO2
C00037	gly	m	reactant		irev	C2H5NO2	C2H5NO2
C00041	ala-L	c	reactant		r	C3H7NO2	C3H7NO2
C00041	ala-L	c	reactant		r	C3H7NO2	C3H7NO2
C00041	ala-L	c	Product		r	C3H7NO2	C3H7NO2
C00041	ala-L	c	Product		irev	C3H7NO2	C3H7NO2
C00042	succ	c	Product		r	C4H6O4	C4H6O4
C00042	succ	c	Product		irev	C4H6O4	C4H6O4
C00042	succ	c	Product		irev	C4H6O4	C4H6O4
C00042	succ	c	Product		r	C4H6O4	C4H6O4
C00042	succ	c	Product		irev	C4H6O4	C4H6O4
C00042	succ	x	Product		irev	C4H6O4	C4H6O4
C00042	succ	c	Product		r	C4H6O4	C4H6O4
C00042	succ	c	Product		r	C4H6O4	C4H6O4
C00042	succ	m	reactant		r	C4H6O4	C4H6O4
C00042	succ	m	reactant		r	C4H6O4	C4H6O4
C00043	uacgam	c	Product		irev	C17H27N3O17P2		1
C00043	uacgam	c	reactant		irev	C17H27N3O17P2		1
C00044	gtp	c	reactant		irev	C10H16N5O14P3	C10H16N5O14P3
C00044	gtp	c	reactant		irev	C10H16N5O14P3	C10H16N5O14P3
C00044	gtp	c	Product		r	C10H16N5O14P3	C10H16N5O14P3
C00044	gtp	c	reactant		irev	C10H16N5O14P3	C10H16N5O14P3
C00044	gtp	c	reactant		irev	C10H16N5O14P3	C10H16N5O14P3
C00044	gtp	c	reactant		irev	C10H16N5O14P3	C10H16N5O14P3
C00044	gtp	c	reactant		irev	C10H16N5O14P3	C10H16N5O14P3
C00044	gtp	c	reactant		irev	C10H16N5O14P3	C10H16N5O14P3
C00044	gtp	c	reactant		irev	C10H16N5O14P3	C10H16N5O14P3
C00047	lys-L	c	Product		r	C6H14N2O2	C6H14N2O2
C00048	glx	c	reactant		r	C2H2O3	C2H2O3
C00048	glx	c	Product		irev	C2H2O3	C2H2O3
C00048	glx	c	reactant		r	C2H2O3	C2H2O3
C00048	glx	x	Product		r	C2H2O3	C2H2O3
C00048	glx	c	Product		irev	C2H2O3	C2H2O3
C00048	glx	x	Product		irev	C2H2O3	C2H2O3
C00048	glx	c	Product		r	C2H2O3	C2H2O3
C00048	glx	m	reactant		irev	C2H2O3	C2H2O3
C00049	asp-L	c	reactant		r	C4H7NO4	C4H7NO4
C00049	asp-L	c	reactant		irev	C4H7NO4	C4H7NO4
C00049	asp-L	c	reactant		r	C4H7NO4	C4H7NO4
C00049	asp-L	c	reactant		irev	C4H7NO4	C4H7NO4
C00049	asp-L	c	reactant		irev	C4H7NO4	C4H7NO4
C00049	asp-L	c	reactant		r	C4H7NO4	C4H7NO4
C00049	asp-L	c	reactant		irev	C4H7NO4	C4H7NO4
C00049	asp-L	n	reactant		irev	C4H7NO4	C4H7NO4
C00051	gthrd	c	Product	2	irev	C10H17N3O6S	C10H17N3O6S
C00051	gthrd	c	reactant	2	irev	C10H17N3O6S	C10H17N3O6S
C00051	gthrd	c	reactant		irev	C10H17N3O6S	C10H17N3O6S
C00051	gthrd	c	Product		irev	C10H17N3O6S	C10H17N3O6S
C00051	gthrd	c	Product		irev	C10H17N3O6S	C10H17N3O6S
C00051	gthrd	c	reactant		r	C10H17N3O6S	C10H17N3O6S
C00051	gthrd	c	Product		irev	C10H17N3O6S	C10H17N3O6S
C00051	gthrd	c	Product		r	C10H17N3O6S	C10H17N3O6S
C00052	udpgal	c	Product		r	C15H24N2O17P2	C15H24N2O17P2
C00052	udpgal	c	Product		r	C15H24N2O17P2	C15H24N2O17P2
C00053	paps	c	reactant		irev	C10H15N5O13P2S	C10H15N5O13P2S
C00053	paps	c	Product		irev	C10H15N5O13P2S	C10H15N5O13P2S
C00053	paps	c	reactant		irev	C10H15N5O13P2S	C10H15N5O13P2S
C00054	pap	c	Product		irev	C10H15N5O10P2	C10H15N5O10P2
C00054	pap	c	reactant		irev	C10H15N5O10P2	C10H15N5O10P2
C00055	cmp	c	Product		r	C9H14N3O8P	C9H14N3O8P
C00055	cmp	c	Product		irev	C9H14N3O8P	C9H14N3O8P
C00055	cmp	c	Product		r	C9H14N3O8P	C9H14N3O8P
C00055	cmp	m	Product		irev	C9H14N3O8P	C9H14N3O8P
C00055	cmp	m	Product		irev	C9H14N3O8P	C9H14N3O8P
C00055	cmp	c	Product		irev	C9H14N3O8P	C9H14N3O8P
C00055	cmp	c	Product		irev	C9H14N3O8P	C9H14N3O8P
C00055	cmp	c	Product		irev	C9H14N3O8P	C9H14N3O8P
C00055	cmp	c	Product		irev	C9H14N3O8P	C9H14N3O8P
C00055	cmp	c	Product		irev	C9H14N3O8P	C9H14N3O8P
C00055	cmp	c	Product		irev	C9H14N3O8P	C9H14N3O8P
C00055	cmp	c	Product		irev	C9H14N3O8P	C9H14N3O8P
C00055	cmp	c	Product		irev	C9H14N3O8P	C9H14N3O8P
C00055	cmp	c	Product		irev	C9H14N3O8P	C9H14N3O8P
C00055	cmp	c	Product		irev	C9H14N3O8P	C9H14N3O8P
C00055	cmp	c	Product		irev	C9H14N3O8P	C9H14N3O8P
C00055	cmp	c	reactant		r	C9H14N3O8P	C9H14N3O8P
C00055	cmp	c	reactant		irev	C9H14N3O8P	C9H14N3O8P
C00055	cmp	c	Product		irev	C9H14N3O8P	C9H14N3O8P
C00058	for	c	Product		irev	CH2O2	CH2O2
C00058	for	c	Product		irev	CH2O2	CH2O2
C00058	for	c	reactant		irev	CH2O2	CH2O2
C00058	for	c	Product		irev	CH2O2	CH2O2
C00058	for	c	reactant		irev	CH2O2	CH2O2
C00058	for	c	Product		irev	CH2O2	CH2O2
C00058	for	c	Product		irev	CH2O2	CH2O2
C00058	for	c	Product		irev	CH2O2	CH2O2
C00059	so4	c	reactant		irev	H2SO4	H2O4S	1
C00061	fmn	c	reactant		irev	C17H21N4O9P	C17H21N4O9P
C00061	fmn	e	reactant		irev	C17H21N4O9P	C17H21N4O9P
C00061	fmn	c	Product		irev	C17H21N4O9P	C17H21N4O9P
C00062	arg-L	c	reactant		irev	C6H14N4O2	C6H14N4O2
C00062	arg-L	c	Product		r	C6H14N4O2	C6H14N4O2
C00063	ctp	c	reactant		irev	C9H16N3O14P3	C9H16N3O14P3
C00063	ctp	c	reactant		irev	C9H16N3O14P3	C9H16N3O14P3
C00063	ctp	c	reactant		r	C9H16N3O14P3	C9H16N3O14P3
C00063	ctp	c	reactant		irev	C9H16N3O14P3	C9H16N3O14P3
C00063	ctp	c	Product		r	C9H16N3O14P3	C9H16N3O14P3
C00063	ctp	c	reactant		irev	C9H16N3O14P3	C9H16N3O14P3
C00063	ctp	c	Product		irev	C9H16N3O14P3	C9H16N3O14P3
C00063	ctp	c	Product		irev	C9H16N3O14P3	C9H16N3O14P3
C00063	ctp	c	reactant		irev	C9H16N3O14P3	C9H16N3O14P3
C00064	gln-L	c	reactant		irev	C5H10N2O3	C5H10N2O3		C5H10N2O3
C00064	gln-L	c	reactant		irev	C5H10N2O3	C5H10N2O3		C5H10N2O3
C00064	gln-L	c	Product		irev	C5H10N2O3	C5H10N2O3
C00064	gln-L	c	reactant		irev	C5H10N2O3	C5H10N2O3
C00064	gln-L	c	reactant		irev	C5H10N2O3	C5H10N2O3
C00064	gln-L	c	reactant		irev	C5H10N2O3	C5H10N2O3
C00064	gln-L	c	reactant		irev	C5H10N2O3	C5H10N2O3
C00064	gln-L	c	reactant		irev	C5H10N2O3	C5H10N2O3
C00064	gln-L	c	reactant		irev	C5H10N2O3	C5H10N2O3
C00064	gln-L	c	reactant		irev	C5H10N2O3	C5H10N2O3
C00064	gln-L	c	reactant		irev	C5H10N2O3	C5H10N2O3
C00064	gln-L	c	reactant		irev	C5H10N2O3	C5H10N2O3
C00064	gln-L	c	reactant		irev	C5H10N2O3	C5H10N2O3
C00064	gln-L	c	reactant		irev	C5H10N2O3	C5H10N2O3
C00064	gln-L	c	reactant		irev	C5H10N2O3	C5H10N2O3
C00065	ser-L	c	reactant		r	C3H7NO3	C3H7NO3
C00065	ser-L	c	Product		irev	C3H7NO3	C3H7NO3
C00065	ser-L	c	Product		r	C3H7NO3	C3H7NO3
C00065	ser-L	c	reactant		irev	C3H7NO3	C3H7NO3
C00065	ser-L	c	reactant		r	C3H7NO3	C3H7NO3
C00065	ser-L	c	reactant		r	C3H7NO3	C3H7NO3
C00065	ser-L	c	reactant		r	C3H7NO3	C3H7NO3
C00065	ser-L	c	reactant		irev	C3H7NO3	C3H7NO3
C00065	ser-L	c	reactant		irev	C3H7NO3	C3H7NO3
C00067	fald	c	Product		irev	CH2O	CH2O
C00067	fald	c	reactant		r	CH2O	CH2O
C00067	fald	c	reactant		irev	CH2O	CH2O
C00068	thmpp	c	reactant		irev	C12H19N4O7P2S	C12H19N4O7P2S
C00068	thmpp	c	Product		irev	C12H19N4O7P2S	C12H19N4O7P2S
C00068	thmpp	m	Product		irev	C12H19N4O7P2S	C12H19N4O7P2S
C00068	thmpp	c	reactant		irev	C12H19N4O7P2S	C12H19N4O7P2S
C00068	thmpp	c	Product		irev	C12H19N4O7P2S	C12H19N4O7P2S
C00068	thmpp	c	Product		irev	C12H19N4O7P2S	C12H19N4O7P2S
C00068	thmpp	m	reactant		irev	C12H19N4O7P2S	C12H19N4O7P2S
C00068	thmpp	m	reactant		irev	C12H19N4O7P2S	C12H19N4O7P2S
C00068	thmpp	m	Product		irev	C12H19N4O7P2S	C12H19N4O7P2S
C00073	met-L	c	reactant		irev	C5H11NO2S	C5H11NO2S
C00073	met-L	c	Product		irev	C5H11NO2S	C5H11NO2S
C00073	met-L	c	Product		irev	C5H11NO2S	C5H11NO2S
C00073	met-L	c	Product		irev	C5H11NO2S	C5H11NO2S
C00073	met-L	c	Product		irev	C5H11NO2S	C5H11NO2S
C00074	pep	c	Product		irev	C3H5O6P	C3H5O6P
C00074	pep	c	Product		r	C3H5O6P	C3H5O6P
C00074	pep	c	reactant		irev	C3H5O6P	C3H5O6P
C00074	pep	c	reactant		irev	C3H5O6P	C3H5O6P
C00074	pep	c	reactant		r	C3H5O6P	C3H5O6P
C00075	utp	c	reactant		irev	C9H15N2O15P3	C9H15N2O15P3
C00075	utp	c	reactant		r	C9H15N2O15P3	C9H15N2O15P3
C00075	utp	c	reactant		irev	C9H15N2O15P3	C9H15N2O15P3
C00075	utp	c	reactant		irev	C9H15N2O15P3	C9H15N2O15P3
C00075	utp	c	Product		r	C9H15N2O15P3	C9H15N2O15P3
C00075	utp	c	reactant		irev	C9H15N2O15P3	C9H15N2O15P3
C00075	utp	c	reactant		irev	C9H15N2O15P3	C9H15N2O15P3
C00075	utp	c	reactant		irev	C9H15N2O15P3	C9H15N2O15P3
C00077	orn	c	Product		irev	C5H12N2O2	C5H12N2O2
C00077	orn	c	reactant		irev	C5H12N2O2	C5H12N2O2
C00077	orn	c	reactant		irev	C5H12N2O2	C5H12N2O2
C00077	orn	m	reactant		irev	C5H12N2O2	C5H12N2O2
C00077	orn	m	Product		r	C5H12N2O2	C5H12N2O2
C00078	trp-L	c	Product		irev	C11H12N2O2	C11H12N2O2
C00078	trp-L	c	reactant		irev	C11H12N2O2	C11H12N2O2
C00078	trp-L	c	reactant		irev	C11H12N2O2	C11H12N2O2
C00078	trp-L	c	reactant		irev	C11H12N2O2	C11H12N2O2
C00079	phe-L	c	reactant		r	C9H11NO2	C9H11NO2
C00080	h	c	reactant		irev	H	0	1	H
C00080	h	c	reactant		irev	H	0	1	H
C00080	h	c	Product		r	H	0	1
C00080	h	c	Product		r	H	0	1
C00080	h	c	Product		irev	H	0	1
C00080	h	c	Product		irev	H	0	1
C00080	h	m	Product		irev	H	0	1
C00080	h	c	Product		r	H	0	1
C00080	h	c	Product		r	H	0	1
C00080	h	c	Product		irev	H	0	1
C00080	h	c	reactant		irev	H	0	1
C00080	h	m	reactant		irev	H	0	1
C00080	h	c	Product		irev	H	0	1
C00080	h	c	Product		irev	H	0	1
C00080	h	c	reactant		irev	H	0	1
C00080	h	c	reactant		irev	H	0	1
C00080	h	c	reactant		irev	H	0	1
C00080	h	c	Product		irev	H	0	1
C00080	h	c	Product		r	H	0	1
C00080	h	c	reactant	8	irev	H	0	1
C00080	h	c	reactant	9	irev	H	0	1
C00080	h	c	reactant	3	irev	H	0	1
C00080	h	c	reactant	3	irev	H	0	1
C00080	h	c	reactant	3	irev	H	0	1
C00080	h	c	reactant	3	irev	H	0	1
C00080	h	c	reactant	3	irev	H	0	1
C00080	h	c	reactant	3	irev	H	0	1
C00080	h	c	reactant	3	irev	H	0	1
C00080	h	c	reactant	3	irev	H	0	1
C00080	h	c	reactant	3	irev	H	0	1
C00080	h	c	reactant	3	irev	H	0	1
C00080	h	c	reactant	9	irev	H	0	1
C00080	h	c	reactant	3	irev	H	0	1
C00080	h	c	reactant	4	irev	H	0	1
C00080	h	c	reactant	4	irev	H	0	1
C00080	h	c	reactant	4	irev	H	0	1
C00080	h	c	reactant		irev	H	0	1
C00080	h	c	reactant		irev	H	0	1
C00080	h	c	reactant		irev	H	0	1
C00080	h	c	reactant		irev	H	0	1
C00080	h	c	reactant	9	irev	H	0	1
C00080	h	c	reactant	3	irev	H	0	1
C00080	h	c	reactant	3	irev	H	0	1
C00080	h	c	reactant	3	irev	H	0	1
C00080	h	c	reactant	4	irev	H	0	1
C00080	h	c	reactant	4	irev	H	0	1
C00080	h	c	reactant	3	irev	H	0	1
C00080	h	c	reactant	5	irev	H	0	1
C00080	h	c	reactant	4	irev	H	0	1
C00080	h	c	reactant	3	irev	H	0	1
C00080	h	c	Product		r	H	0	1
C00080	h	c	Product		r	H	0	1
C00080	h	c	Product		r	H	0	1
C00080	h	c	Product		r	H	0	1
C00080	h	c	Product		r	H	0	1
C00080	h	c	Product		r	H	0	1
C00080	h	c	Product		r	H	0	1
C00080	h	c	Product		r	H	0	1
C00080	h	m	Product		r	H	0	1
C00080	h	m	Product	3	irev	H	0	1
C00080	h	m	reactant		r	H	0	1
C00080	h	m	reactant		r	H	0	1
C00080	h	m	reactant		r	H	0	1
C00080	h	m	reactant		r	H	0	1
C00080	h	m	reactant		r	H	0	1
C00080	h	m	Product	3	irev	H	0	1
C00080	h	m	Product	5	irev	H	0	1
C00080	h	m	Product	6	irev	H	0	1
C00080	h	m	Product	6	irev	H	0	1
C00080	h	m	Product	7	irev	H	0	1
C00080	h	m	Product	7	irev	H	0	1
C00080	h	m	Product	8	irev	H	0	1
C00080	h	m	Product	6	irev	H	0	1
C00080	h	m	Product	7	irev	H	0	1
C00080	h	m	Product	8	irev	H	0	1
C00080	h	m	Product		irev	H	0	1
C00080	h	m	Product		irev	H	0	1
C00080	h	m	Product		irev	H	0	1
C00080	h	m	Product		irev	H	0	1
C00080	h	m	Product		irev	H	0	1
C00080	h	m	Product		irev	H	0	1
C00080	h	m	Product		irev	H	0	1
C00080	h	c	Product		r	H	0	1
C00080	h	c	Product		r	H	0	1
C00080	h	c	Product		irev	H	0	1
C00080	h	c	Product		r	H	0	1
C00080	h	c	reactant		irev	H	0	1
C00080	h	m	Product		r	H	0	1
C00080	h	c	reactant		irev	H	0	1
C00080	h	c	Product		r	H	0	1
C00080	h	c	Product		irev	H	0	1
C00080	h	c	reactant		irev	H	0	1
C00080	h	m	reactant		irev	H	0	1
C00080	h	c	Product		irev	H	0	1
C00080	h	c	Product		r	H	0	1
C00080	h	c	reactant		irev	H	0	1
C00080	h	c	reactant		r	H	0	1
C00080	h	c	reactant		irev	H	0	1
C00080	h	c	Product		irev	H	0	1
C00080	h	c	Product		irev	H	0	1
C00080	h	c	Product		irev	H	0	1
C00080	h	c	Product		irev	H	0	1
C00080	h	c	Product		r	H	0	1
C00080	h	m	Product		irev	H	0	1
C00080	h	m	Product		irev	H	0	1
C00080	h	c	Product		irev	H	0	1
C00080	h	c	Product		irev	H	0	1
C00080	h	c	Product		irev	H	0	1
C00080	h	c	Product		irev	H	0	1
C00080	h	c	Product		irev	H	0	1
C00080	h	m	Product		irev	H	0	1
C00080	h	m	Product		irev	H	0	1
C00080	h	c	Product		r	H	0	1
C00080	h	c	Product		r	H	0	1
C00080	h	m	Product		irev	H	0	1
C00080	h	c	Product		r	H	0	1
C00080	h	c	Product	2	irev	H	0	1
C00080	h	c	Product		irev	H	0	1
C00080	h	c	Product		irev	H	0	1
C00080	h	c	Product		r	H	0	1
C00080	h	m	Product		r	H	0	1
C00080	h	c	Product		r	H	0	1
C00080	h	c	Product		r	H	0	1
C00080	h	c	Product		r	H	0	1
C00080	h	c	Product		irev	H	0	1
C00080	h	m	reactant		irev	H	0	1
C00080	h	m	reactant	1.5	irev	H	0	1
C00080	h	c	Product	1.5	irev	H	0	1
C00080	h	c	reactant		irev	H	0	1
C00080	h	m	reactant	4	irev	H	0	1
C00080	h	e	Product		irev	H	0	1
C00080	h	c	reactant	3	irev	H	0	1
C00080	h	m	Product	2	irev	H	0	1
C00080	h	c	Product		r	H	0	1
C00080	h	c	reactant		r	H	0	1
C00080	h	m	reactant		irev	H	0	1
C00080	h	c	Product		r	H	0	1
C00080	h	c	reactant		irev	H	0	1
C00080	h	c	reactant		irev	H	0	1
C00080	h	c	reactant		irev	H	0	1
C00080	h	c	Product		r	H	0	1
C00080	h	c	Product		r	H	0	1
C00080	h	c	reactant		irev	H	0	1
C00080	h	c	reactant		irev	H	0	1
C00080	h	c	Product	2	r	H	0	1
C00080	h	c	Product		irev	H	0	1
C00080	h	c	Product		irev	H	0	1
C00080	h	c	Product		irev	H	0	1
C00080	h	c	Product		irev	H	0	1
C00080	h	c	reactant		irev	H	0	1
C00080	h	m	Product	2	irev	H	0	1
C00080	h	c	Product	2	irev	H	0	1
C00080	h	c	Product		irev	H	0	1
C00080	h	c	Product		r	H	0	1
C00080	h	c	Product		irev	H	0	1
C00080	h	c	Product		r	H	0	1
C00080	h	c	reactant		irev	H	0	1
C00080	h	m	Product	2	irev	H	0	1
C00080	h	m	Product	2	irev	H	0	1
C00080	h	m	Product		irev	H	0	1
C00080	h	m	Product		r	H	0	1
C00080	h	c	reactant		irev	H	0	1
C00080	h	c	reactant		irev	H	0	1
C00080	h	c	reactant	3	irev	H	0	1
C00080	h	c	reactant		irev	H	0	1
C00080	h	c	reactant		irev	H	0	1
C00080	h	c	Product		irev	H	0	1
C00080	h	c	Product		irev	H	0	1
C00080	h	c	Product		irev	H	0	1
C00080	h	c	Product		irev	H	0	1
C00080	h	c	reactant		irev	H	0	1
C00080	h	c	reactant		irev	H	0	1
C00080	h	c	reactant		irev	H	0	1
C00080	h	c	reactant		irev	H	0	1
C00080	h	c	Product		irev	H	0	1
C00080	h	c	Product		irev	H	0	1
C00080	h	c	Product		irev	H	0	1
C00080	h	c	Product		irev	H	0	1
C00080	h	c	Product		irev	H	0	1
C00080	h	c	Product		irev	H	0	1
C00080	h	c	Product		irev	H	0	1
C00080	h	c	reactant		irev	H	0	1
C00080	h	c	reactant	3	irev	H	0	1
C00080	h	c	reactant	3	irev	H	0	1
C00080	h	r	reactant		irev	H	0	1
C00080	h	c	reactant		irev	H	0	1
C00080	h	r	reactant		irev	H	0	1
C00080	h	c	reactant		irev	H	0	1
C00080	h	c	Product		irev	H	0	1
C00080	h	c	Product		irev	H	0	1
C00080	h	c	reactant	2	irev	H	0	1
C00080	h	c	Product		irev	H	0	1
C00080	h	m	Product		irev	H	0	1
C00080	h	m	Product		r	H	0	1
C00080	h	m	Product		irev	H	0	1
C00080	h	c	Product		r	H	0	1
C00080	h	c	Product		r	H	0	1
C00080	h	c	Product		r	H	0	1
C00080	h	c	Product		irev	H	0	1
C00080	h	c	reactant		irev	H	0	1
C00080	h	c	Product	2	irev	H	0	1
C00080	h	c	Product		irev	H	0	1
C00080	h	c	Product		irev	H	0	1
C00080	h	c	reactant		irev	H	0	1
C00080	h	c	Product		r	H	0	1
C00080	h	c	Product		r	H	0	1
C00080	h	m	Product		r	H	0	1
C00080	h	m	Product		r	H	0	1
C00080	h	c	Product		r	H	0	1
C00080	h	c	Product		r	H	0	1
C00080	h	c	Product		irev	H	0	1
C00080	h	c	Product		irev	H	0	1
C00080	h	c	Product		r	H	0	1
[truncated: 1,542 more rows]

## Sheet: Sheet2
keggID	abbreviation	compartment	character	stoichiometric coefficient	revesibility	keggformula	iMM904		formulaNeutral	charge	formula
	3hxccoa	m	Product		r	#N/A	0	#N/A
	3hxccoa	m	reactant		r	#N/A	0	#N/A
	3ohxccoa	m	Product		r	#N/A	0	#N/A
	3ohxccoa	m	reactant		irev	#N/A	0	#N/A
	cer1_24	c	Product		irev	#N/A	C42H85NO3	#N/A
	cer1_24	c	reactant		irev	#N/A	C42H85NO3	#N/A
	cer1_24	c	reactant		irev	#N/A	C42H85NO3	#N/A
	cer1_26	c	Product		irev	#N/A	C44H89NO3	#N/A
	cer1_26	c	reactant		irev	#N/A	C44H89NO3	#N/A
	cer1_26	c	reactant		irev	#N/A	C44H89NO3	#N/A
	cer2_24	c	Product		irev	#N/A	C42H85NO4	#N/A
	cer2_24	c	Product		irev	#N/A	C42H85NO4	#N/A
	cer2_24	c	reactant		irev	#N/A	C42H85NO4	#N/A
	cer2_24	c	reactant		irev	#N/A	C42H85NO4	#N/A
	cer2_26	c	Product		irev	#N/A	C44H89NO4	#N/A
	cer2_26	c	Product		irev	#N/A	C44H89NO4	#N/A
	cer2_26	c	reactant		irev	#N/A	C44H89NO4	#N/A
	cer2_26	c	reactant		irev	#N/A	C44H89NO4	#N/A
	cer3_24	c	Product		irev	#N/A	C42H85NO5	#N/A
	cer3_24	c	reactant		irev	#N/A	C42H85NO5	#N/A
	cer3_26	c	Product		irev	#N/A	C44H89NO5	#N/A
	cer3_26	c	reactant		irev	#N/A	C44H89NO5	#N/A
	hdcoa	c	Product		r	#N/A	0	#N/A
	hdcoa	c	Product		irev	#N/A	0	#N/A
	hdcoa	m	reactant		irev	#N/A	0	#N/A
	hdcoa	m	reactant		irev	#N/A	0	#N/A
	hdcoa	m	Product		r	#N/A	0	#N/A
	hdcoa	c	reactant	0.17	irev	#N/A	0	#N/A
	hdcoa	c	reactant	0.17	irev	#N/A	0	#N/A
	hdcoa	c	reactant	0.17	irev	#N/A	0	#N/A
	hdcoa	c	reactant	0.17	irev	#N/A	0	#N/A
	hdcoa	c	reactant	0.17	irev	#N/A	0	#N/A
	hexc	c	Product		irev	#N/A	C26H52O2	#N/A
	hexc	c	reactant		r	#N/A	C26H52O2	#N/A
	hexc	m	reactant		r	#N/A	C26H52O2	#N/A
	hexccoa	c	Product		r	#N/A	C47H86N7O17P3S	#N/A
	hexccoa	m	reactant		irev	#N/A	C47H86N7O17P3S	#N/A
	hexccoa	m	Product		r	#N/A	C47H86N7O17P3S	#N/A
	hexccoa	c	reactant		irev	#N/A	C47H86N7O17P3S	#N/A
	hexccoa	c	reactant		irev	#N/A	C47H86N7O17P3S	#N/A
	hxc2coa	m	Product		irev	#N/A	0	#N/A
	hxc2coa	m	reactant		r	#N/A	0	#N/A
	ipc124_SC	c	Product	0.01	irev	#N/A	0	#N/A
	ipc124_SC	c	reactant	0.01	irev	#N/A	0	#N/A
	ipc126_SC	c	Product	0.01	irev	#N/A	0	#N/A
	ipc126_SC	c	reactant	0.01	irev	#N/A	0	#N/A
	ipc224_SC	c	Product	0.01	irev	#N/A	0	#N/A
	ipc224_SC	c	reactant	0.01	irev	#N/A	0	#N/A
	ipc226_SC	c	Product	0.01	irev	#N/A	0	#N/A
	ipc226_SC	c	reactant	0.01	irev	#N/A	0	#N/A
	ipc324_SC	c	Product	0.01	irev	#N/A	0	#N/A
	ipc324_SC	c	reactant	0.01	irev	#N/A	0	#N/A
	ipc326_SC	c	Product	0.01	irev	#N/A	0	#N/A
	ipc326_SC	c	reactant	0.01	irev	#N/A	0	#N/A
	mip2c124_SC	c	Product	0.01	irev	#N/A	0	#N/A
	mip2c126_SC	c	Product	0.01	irev	#N/A	0	#N/A
	mip2c224_SC	c	Product	0.01	irev	#N/A	0	#N/A
	mip2c226_SC	c	Product	0.01	irev	#N/A	0	#N/A
	mip2c324_SC	c	Product	0.01	irev	#N/A	0	#N/A
	mip2c326_SC	c	Product	0.01	irev	#N/A	0	#N/A
	mipc124_SC	c	Product	0.01	irev	#N/A	0	#N/A
	mipc124_SC	c	reactant	0.01	irev	#N/A	0	#N/A
	mipc126_SC	c	Product	0.01	irev	#N/A	0	#N/A
	mipc126_SC	c	reactant	0.01	irev	#N/A	0	#N/A
	mipc224_SC	c	Product	0.01	irev	#N/A	0	#N/A
	mipc224_SC	c	reactant	0.01	irev	#N/A	0	#N/A
	mipc226_SC	c	Product	0.01	irev	#N/A	0	#N/A
	mipc226_SC	c	reactant	0.01	irev	#N/A	0	#N/A
	mipc324_SC	c	Product	0.01	irev	#N/A	0	#N/A
	mipc324_SC	c	reactant	0.01	irev	#N/A	0	#N/A
	mipc326_SC	c	Product	0.01	irev	#N/A	0	#N/A
	mipc326_SC	c	reactant	0.01	irev	#N/A	0	#N/A
	ocdcea	c	Product		irev	#N/A	C18H34O2	#N/A
	ocdcea	c	reactant		r	#N/A	C18H34O2	#N/A
	ocdcea	c	Product		r	#N/A	C18H34O2	#N/A
	ocdcea	m	reactant		r	#N/A	C18H34O2	#N/A
	ocdcea	c	Product	0.24	irev	#N/A	C18H34O2	#N/A
	ocdcea	c	Product	0.24	irev	#N/A	C18H34O2	#N/A
	ocdcya	c	reactant		r	#N/A	C18H32O2	#N/A
	ocdcya	c	Product		r	#N/A	C18H32O2	#N/A
	ocdcya	m	reactant		r	#N/A	C18H32O2	#N/A
	ocdcya	c	Product	0.09	irev	#N/A	C18H32O2	#N/A
	ocdcya	c	Product	0.09	irev	#N/A	C18H32O2	#N/A
	ocdcyaACP	c	Product		irev	#N/A	0	#N/A
	ocdcyaACP	c	reactant		r	#N/A	0	#N/A
	ocdycacoa	c	Product		r	#N/A	0	#N/A
	ocdycacoa	c	Product		irev	#N/A	0	#N/A
	ocdycacoa	m	reactant		irev	#N/A	0	#N/A
	ocdycacoa	m	reactant		irev	#N/A	0	#N/A
	ocdycacoa	m	reactant		irev	#N/A	0	#N/A
	ocdycacoa	m	Product		r	#N/A	0	#N/A
	ocdycacoa	c	reactant	0.09	irev	#N/A	0	#N/A
	ocdycacoa	c	reactant	0.09	irev	#N/A	0	#N/A
	ocdycacoa	c	reactant	0.09	irev	#N/A	0	#N/A
	ocdycacoa	c	reactant	0.09	irev	#N/A	0	#N/A
	ocdycacoa	c	reactant	0.09	irev	#N/A	0	#N/A
	od2coa	m	Product		irev	#N/A	C39H68N7O17P3S	#N/A
	od2coa	m	Product		r	#N/A	C39H68N7O17P3S	#N/A
	odecoa	c	Product		r	#N/A	0	#N/A
	odecoa	c	Product		irev	#N/A	0	#N/A
	odecoa	c	reactant		irev	#N/A	0	#N/A
	odecoa	m	reactant		irev	#N/A	0	#N/A
	odecoa	m	reactant		irev	#N/A	0	#N/A
	odecoa	m	Product		r	#N/A	0	#N/A
	odecoa	c	reactant	0.24	irev	#N/A	0	#N/A
	odecoa	c	reactant	0.24	irev	#N/A	0	#N/A
	odecoa	c	reactant	0.24	irev	#N/A	0	#N/A
	odecoa	c	reactant	0.24	irev	#N/A	0	#N/A
	odecoa	c	reactant	0.24	irev	#N/A	0	#N/A
	pe_SC	c	Product	0.01	irev	#N/A	C3740H7244N100O800P100	#N/A
	pe_SC	c	reactant	0.01	irev	#N/A	C3740H7244N100O800P100	#N/A
	pe_SC	c	Product	0.01	r	#N/A	C3740H7244N100O800P100	#N/A
	pg_SC	m	Product	0.01	irev	#N/A	0	#N/A
	pg_SC	m	reactant	0.01	irev	#N/A	0	#N/A
	pgp_SC	m	reactant	0.01	irev	#N/A	0	#N/A
	pgp_SC	m	Product	0.01	irev	#N/A	0	#N/A
	ptd4ino_SC	c	Product	0.01	irev	#N/A	0	#N/A
	ptd4ino_SC	c	reactant	0.01	irev	#N/A	0	#N/A
	q6h2	m	Product		irev	#N/A	C39H60O4	#N/A
	q6h2	m	reactant		irev	#N/A	C39H60O4	#N/A
	q6h2	m	Product		irev	#N/A	C39H60O4	#N/A
	tdeACP	c	Product		irev	#N/A	0	#N/A
	tdeACP	c	reactant		r	#N/A	0	#N/A
	tdecoa	c	Product		r	#N/A	0	#N/A
	tdecoa	c	Product		irev	#N/A	0	#N/A
	tdecoa	m	reactant		irev	#N/A	0	#N/A
	tdecoa	m	reactant		irev	#N/A	0	#N/A
	tdecoa	m	Product		r	#N/A	0	#N/A
	ttc	c	Product		irev	#N/A	0	#N/A
	ttc	c	reactant		irev	#N/A	0	#N/A
	ttc	c	reactant		r	#N/A	0	#N/A
	ttc	m	Product		irev	#N/A	0	#N/A
	ttc	m	reactant		r	#N/A	0	#N/A
	ttccoa	c	Product		r	#N/A	0	#N/A
	ttccoa	m	Product		irev	#N/A	0	#N/A
	ttccoa	m	reactant		irev	#N/A	0	#N/A
	ttccoa	m	reactant		irev	#N/A	0	#N/A
	ttccoa	m	Product		r	#N/A	0	#N/A
	ttccoa	c	reactant		irev	#N/A	0	#N/A
	ttccoa	c	reactant		irev	#N/A	0	#N/A
	ttdcea	c	Product		irev	#N/A	0	#N/A
	ttdcea	c	reactant		r	#N/A	0	#N/A
	ttdcea	c	Product		r	#N/A	0	#N/A
	ttdcea	m	reactant		r	#N/A	0	#N/A

## Sheet: Introduction
worksheet's name	content
grRatio	Results of every single gene deletion. "ratio" means the prodution of biomass of the mutant stain to that of wild-type strain
flux distribution of wild-type	The flux value of each reaction in wild-type-strain
Non-essential genes	The non-essential genes predicted using FBA in the glucose-minimal media
maximal flux of FVA	The maximum flux of each reaction in wild-type and mutant strain predicted using FVA
minimal flux of FVA	The minimum flux of each reaction in wild-type and mutant strain predicted using FVA
SD value	Results of FVA, which was showed in Fig. 5
culture medium	The articles used to help determine the minimal culture media in silico
Reaction-Gene pairs	Reactions with zero minimum or maximum flux in the wild-type strain but non-zero minimum or maximum flux when the corresponding gene was deleted.

## Sheet: grRatio
ID	gene	ratio
1	YALI0A00264g	1
2	YALI0A01133g	1		enough oxygen	glucose：20 mmol/(gDW*h-1)
3	YALI0A01870g	1
4	YALI0A02310g	0
5	YALI0A02541g	1
6	YALI0A02915g	1
7	YALI0A04983g	0.999604
8	YALI0A05379g	1
9	YALI0A06787g	0.999604
10	YALI0A08041g	1
11	YALI0A08217g	1
12	YALI0A08668g	1
13	YALI0A09042g	1
14	YALI0A09856g	0.975893
15	YALI0A09900g	0.861941
16	YALI0A10032g	1
17	YALI0A10076g	0
18	YALI0A10310g	1
19	YALI0A10659g	0.862205
20	YALI0A11143g	0.861941
21	YALI0A12045g	1
22	YALI0A12353g	1
23	YALI0A12573g	1
24	YALI0A13387g	0
25	YALI0A14498g	1
26	YALI0A14784g	0.999805
27	YALI0A15125g	-1.8407e-12
28	YALI0A15147g	1
29	YALI0A15950g	0
30	YALI0A15972g	1
31	YALI0A16379g	1
32	YALI0A16698g	1
33	YALI0A18062g	0
34	YALI0A18183g	1
35	YALI0A18656g	0
36	YALI0A19206g	1
37	YALI0A19558g	1
38	YALI0A20108g	1
39	YALI0A20680g	1
40	YALI0A21153g	1
41	YALI0A21417g	0.978195
42	YALI0B00220g	1
43	YALI0B00572g	1
44	YALI0B00704g	0.978466
45	YALI0B00726g	1
46	YALI0B00792g	1
47	YALI0B00836g	1
48	YALI0B01298g	1
49	YALI0B01364g	3.21056e-25
50	YALI0B01826g	1
51	YALI0B02178g	1
52	YALI0B02376g	1
53	YALI0B02728g	1
54	YALI0B02852g	1
55	YALI0B02948g	1
56	YALI0B03124g	1
57	YALI0B03344g	0.999805
58	YALI0B03564g	1
59	YALI0B03630g	0
60	YALI0B03982g	0.861941
61	YALI0B04202g	1
62	YALI0B04312g	-3.31227e-28
63	YALI0B05126g	0
64	YALI0B05368g	6.11079e-27
65	YALI0B05500g	0
66	YALI0B06006g	1
67	YALI0B06831g	0.861941
68	YALI0B06941g	1
69	YALI0B07447g	0
70	YALI0B08140g	-5.07885e-12
71	YALI0B08184g	-1.64465e-22
72	YALI0B08536g	1
73	YALI0B08943g	1
74	YALI0B08965g	1
75	YALI0B09515g	1
76	YALI0B09537g	1
77	YALI0B09647g	1
78	YALI0B10340g	1
79	YALI0B10406g	1
80	YALI0B11044g	1
81	YALI0B11154g	1
82	YALI0B11330g	1
83	YALI0B12078g	1
84	YALI0B13420g	1
85	YALI0B13552g	1
86	YALI0B13970g	1
87	YALI0B14399g	0
88	YALI0B14465g	1
89	YALI0B14509g	0
90	YALI0B14619g	1
91	YALI0B14729g	1
92	YALI0B14861g	1
93	YALI0B14927g	1
94	YALI0B15059g	1
95	YALI0B15304g	-3.59398e-12
96	YALI0B15444g	0
97	YALI0B15598g	1
98	YALI0B15884g	1
99	YALI0B16038g	9.82806e-28
100	YALI0B16104g	-1.32692e-11
101	YALI0B16324g	1
102	YALI0B16390g	1
103	YALI0B16522g	1
104	YALI0B17204g	1
105	YALI0B17336g	0
106	YALI0B17402g	9.88225e-13
107	YALI0B17644g	0
108	YALI0B17666g	-3.11977e-27
109	YALI0B17688g	1
110	YALI0B17930g	0
111	YALI0B18348g	0
112	YALI0B18759g	1
113	YALI0B18898g	1
114	YALI0B19338g	1
115	YALI0B19382g	1
116	YALI0B19998g	1
117	YALI0B20020g	1
118	YALI0B20372g	1
119	YALI0B20438g	1
120	YALI0B21142g	1
121	YALI0B21428g	7.33559e-25
122	YALI0B21527g	0.861941
123	YALI0B21846g	1
124	YALI0B22066g	1
125	YALI0B22308g	1
126	YALI0B22440g	1
127	YALI0B22506g	1
128	YALI0B22550g	1
129	YALI0B22902g	1
130	YALI0B22924g	1
131	YALI0B23188g	2.9261e-11
132	YALI0B23298g	0
133	YALI0C00209g	8.90347e-29
134	YALI0C00253g	9.21061e-27
135	YALI0C00451g	1
136	YALI0C01111g	1
137	YALI0C01411g	1
138	YALI0C01419g	1
139	YALI0C01716g	1
140	YALI0C01859g	1
141	YALI0C02431g	1
142	YALI0C03025g	1
143	YALI0C03179g	1
144	YALI0C03201g	1
145	YALI0C04180g	1
146	YALI0C04433g	1
147	YALI0C05170g	0
148	YALI0C05753g	1
149	YALI0C05951g	1
150	YALI0C06083g	1
151	YALI0C06303g	1
152	YALI0C06369g	2.15867e-14
153	YALI0C06490g	1
154	YALI0C06776g	0.999805
155	YALI0C06798g	1
156	YALI0C06952g	1
157	YALI0C06996g	1
158	YALI0C07128g	0
159	YALI0C07678g	1
160	YALI0C08074g	1
161	YALI0C08811g	1
162	YALI0C09636g	9.21061e-27
163	YALI0C10780g	1
164	YALI0C10901g	-4.17946e-25
165	YALI0C10989g	1
166	YALI0C11363g	1
167	YALI0C11407g	1
168	YALI0C11803g	1
169	YALI0C11880g	1
170	YALI0C12771g	-6.31585e-26
171	YALI0C13090g	1
172	YALI0C13354g	1
173	YALI0C13574g	1
174	YALI0C14344g	1
175	YALI0C15554g	1
176	YALI0C16434g	0
177	YALI0C16522g	1
178	YALI0C16885g	1
179	YALI0C16995g	1
180	YALI0C17831g	1
181	YALI0C18205g	1
182	YALI0C18315g	1
183	YALI0C18425g	1
184	YALI0C18755g	1
185	YALI0C18799g	1
186	YALI0C19085g	1
187	YALI0C19195g	1
188	YALI0C19712g	1
189	YALI0C19866g	1
190	YALI0C20405g	1
191	YALI0C20427g	1
192	YALI0C20669g	1
193	YALI0C22088g	1
194	YALI0C22165g	0
195	YALI0C22616g	1
196	YALI0C22792g	1
197	YALI0C23210g	1
198	YALI0C23342g	1
199	YALI0C23364g	1
200	YALI0C23408g	2.75122e-27
201	YALI0C23617g	1
202	YALI0C23859g	1
203	YALI0C23969g	1
204	YALI0C24101g	0.977231
205	YALI0C24233g	1
206	YALI0C24255g	1
207	YALI0C24354g	1
208	YALI0D00583g	0.861941
209	YALI0D00605g	1
210	YALI0D00737g	1
211	YALI0D01089g	0.977977
212	YALI0D01265g	0
213	YALI0D01309g	1
214	YALI0D02321g	1
215	YALI0D02497g	1
216	YALI0D02629g	4.51268e-12
217	YALI0D03069g	-2.03181e-11
218	YALI0D03135g	2.75122e-27
219	YALI0D03179g	1
220	YALI0D03333g	0
221	YALI0D03480g	1
222	YALI0D04026g	1
223	YALI0D04378g	0
224	YALI0D04741g	1
225	YALI0D04939g	1
226	YALI0D05467g	1
227	YALI0D05621g	1
228	YALI0D05797g	1
229	YALI0D06237g	1
230	YALI0D06281g	0
231	YALI0D06303g	1
232	YALI0D06325g	1
233	YALI0D06501g	1
234	YALI0D06798g	1
235	YALI0D06974g	1
236	YALI0D07216g	1
237	YALI0D07370g	1
238	YALI0D07392g	1
239	YALI0D07942g	1
240	YALI0D07986g	1
241	YALI0D08382g	1
242	YALI0D08514g	0
243	YALI0D08690g	1
244	YALI0D09229g	1
245	YALI0D09361g	1
246	YALI0D09867g	1
247	YALI0D10131g	1
248	YALI0D10593g	-1.43542e-27
249	YALI0D10813g	1
250	YALI0D11110g	0
251	YALI0D11176g	-2.69884e-13
252	YALI0D11374g	0.999805
253	YALI0D11704g	0.977977
254	YALI0D11814g	0.861941
255	YALI0D12400g	2.15867e-14
256	YALI0D12584g	0.861941
257	YALI0D12661g	1
258	YALI0D13024g	1
259	YALI0D13112g	0
260	YALI0D13596g	0.977977
261	YALI0D14300g	0
262	YALI0D14322g	1
263	YALI0D14476g	0
264	YALI0D14850g	1
265	YALI0D14894g	0
266	YALI0D15598g	1
267	YALI0D16357g	0.931348
268	YALI0D16445g	1
269	YALI0D16753g	1
270	YALI0D16797g	1
271	YALI0D17050g	1
272	YALI0D17072g	1
273	YALI0D17402g	1
274	YALI0D17490g	0.861941
275	YALI0D17534g	1
276	YALI0D17556g	1
277	YALI0D17864g	1
278	YALI0D17930g	-3.82779e-26
279	YALI0D18271g	1
280	YALI0D18337g	1
281	YALI0D18920g	1.26266e-26
282	YALI0D19030g	1
283	YALI0D19140g	1
284	YALI0D19184g	1
285	YALI0D19206g	0
286	YALI0D19426g	1
287	YALI0D20152g	8.13404e-27
288	YALI0D20768g	0.975893
289	YALI0D20878g	0
290	YALI0D21010g	1
291	YALI0D21032g	1
292	YALI0D21530g	-1.91389e-26
293	YALI0D21604g	1
294	YALI0D22022g	0.861941
295	YALI0D22396g	1
296	YALI0D22484g	1
297	YALI0D22847g	-3.11977e-27
298	YALI0D22891g	0
299	YALI0D23331g	1
300	YALI0D23397g	0.999805
301	YALI0D23683g	1
302	YALI0D23815g	1
303	YALI0D24409g	-6.89821e-12
304	YALI0D24585g	1
305	YALI0D24607g	1
306	YALI0D24750g	1
307	YALI0D25168g	1
308	YALI0D25476g	1
309	YALI0D25564g	1
310	YALI0D25630g	1
311	YALI0D25938g	1
312	YALI0D26147g	1
313	YALI0D26367g	0
314	YALI0D27016g	1
315	YALI0D27126g	3.31501e-12
316	YALI0D27170g	0
317	YALI0E00264g	1
318	YALI0E00418g	-2.8756e-12
319	YALI0E00638g	1
320	YALI0E00836g	1
321	YALI0E01056g	1
322	YALI0E01254g	0
323	YALI0E02090g	1
324	YALI0E02244g	1
325	YALI0E02288g	1
326	YALI0E02310g	1
327	YALI0E02398g	1
328	YALI0E02684g	1
329	YALI0E02728g	-1.43542e-27
330	YALI0E03146g	0
331	YALI0E03212g	1
332	YALI0E04048g	1
333	YALI0E04202g	1
334	YALI0E04224g	1
335	YALI0E04807g	9.82806e-28
336	YALI0E05049g	0
337	YALI0E05137g	1
338	YALI0E05203g	1
339	YALI0E05599g	1
340	YALI0E05753g	1
341	YALI0E05929g	1
342	YALI0E06061g	3.62922e-25
343	YALI0E06193g	9.82806e-28
344	YALI0E06413g	1
345	YALI0E06457g	0
346	YALI0E06479g	-1.43542e-27
347	YALI0E07073g	1
348	YALI0E07271g	1
349	YALI0E07535g	1
350	YALI0E08536g	1
351	YALI0E08617g	0.861941
352	YALI0E09108g	1
353	YALI0E09493g	1.26266e-26
354	YALI0E09603g	1
355	YALI0E09933g	0.861941
356	YALI0E11099g	1
357	YALI0E11355g	0.861941
358	YALI0E11385g	1
359	YALI0E11495g	1
360	YALI0E11671g	1
361	YALI0E12441g	3.62922e-25
362	YALI0E12442g	3.62922e-25
363	YALI0E12463g	1
364	YALI0E12573g	1
365	YALI0E12683g	1
366	YALI0E13057g	-3.11977e-27
367	YALI0E14102g	1
368	YALI0E14190g	1
369	YALI0E14443g	1.91614e-26
370	YALI0E14685g	1
371	YALI0E14751g	1
372	YALI0E14949g	1
373	YALI0E15081g	1
374	YALI0E15125g	1
375	YALI0E15224g	1
376	YALI0E15488g	1
377	YALI0E15708g	1
378	YALI0E15730g	0
379	YALI0E16060g	1
380	YALI0E16192g	0.861941
381	YALI0E16346g	1
382	YALI0E16368g	-2.69884e-13
383	YALI0E16434g	1
384	YALI0E16643g	1
385	YALI0E16797g	1
386	YALI0E16907g	1
387	YALI0E16929g	1
388	YALI0E17347g	1
389	YALI0E17479g	1
390	YALI0E17633g	1
391	YALI0E17787g	1
392	YALI0E18029g	1
393	YALI0E18238g	1
394	YALI0E18568g	1
395	YALI0E18634g	1
396	YALI0E18898g	1
397	YALI0E18942g	1
398	YALI0E18964g	1
399	YALI0E20163g	1
400	YALI0E20207g	1
401	YALI0E20361g	1
402	YALI0E20471g	1
403	YALI0E20603g	1
404	YALI0E20625g	1
405	YALI0E20713g	1
406	YALI0E20977g	0
407	YALI0E21021g	1
408	YALI0E21197g	1
409	YALI0E21307g	1
410	YALI0E21351g	1
411	YALI0E22198g	1
412	YALI0E22649g	1
413	YALI0E23089g	1
414	YALI0E23859g	-1.8407e-12
415	YALI0E24013g	1
416	YALI0E24057g	1
417	YALI0E24167g	1
418	YALI0E24497g	1
419	YALI0E24607g	1
420	YALI0E25652g	1
421	YALI0E25740g	1
422	YALI0E26004g	0.931348
423	YALI0E26719g	1
424	YALI0E26829g	1
425	YALI0E27005g	1
426	YALI0E27203g	1.55977e-12
427	YALI0E27346g	0.861941
428	YALI0E28153g	1
429	YALI0E28963g	1
430	YALI0E29161g	1
431	YALI0E29579g	0
432	YALI0E29667g	0.999805
433	YALI0E29975g	1
434	YALI0E30129g	1
435	YALI0E30283g	1
436	YALI0E30481g	1
437	YALI0E30965g	1
438	YALI0E31009g	1
439	YALI0E31064g	-1.8407e-12
440	YALI0E31086g	1
441	YALI0E31471g	0.861941
442	YALI0E31515g	1
443	YALI0E31766g	1
444	YALI0E32065g	1
445	YALI0E32351g	1
446	YALI0E32527g	1
447	YALI0E32681g	1
448	YALI0E33033g	2.9261e-11
449	YALI0E33143g	1
450	YALI0E33517g	1
451	YALI0E33957g	0
452	YALI0E34265g	1
453	YALI0E34672g	1
454	YALI0E34749g	1
455	YALI0E34771g	1
456	YALI0E35222g	1
457	YALI0F00462g	1
458	YALI0F00484g	1
459	YALI0F00506g	1
460	YALI0F00924g	1
461	YALI0F01584g	1
462	YALI0F01606g	1
463	YALI0F01628g	1
464	YALI0F01672g	1
465	YALI0F02013g	1
466	YALI0F02123g	1
467	YALI0F02299g	1
468	YALI0F02607g	1
469	YALI0F02849g	0.975893
470	YALI0F02893g	0.861941
471	YALI0F03179g	0.861941
472	YALI0F03663g	1
473	YALI0F04015g	0
474	YALI0F04095g	1
475	YALI0F04169g	1
476	YALI0F04378g	0
477	YALI0F04444g	1
478	YALI0F04532g	1
479	YALI0F04774g	0.861941
480	YALI0F05038g	1
481	YALI0F05126g	1
482	YALI0F05192g	0
483	YALI0F05214g	1
484	YALI0F05390g	1
485	YALI0F05500g	1
486	YALI0F05610g	1
487	YALI0F05632g	9.82806e-28
488	YALI0F05874g	1
489	YALI0F05962g	1
490	YALI0F06050g	1
491	YALI0F06424g	1
492	YALI0F06468g	1
493	YALI0F06710g	1
494	YALI0F06820g	1
495	YALI0F06842g	1
496	YALI0F07062g	1
497	YALI0F07260g	1
498	YALI0F07711g	1
499	YALI0F07821g	1
500	YALI0F08217g	1
501	YALI0F08415g	1
502	YALI0F08701g	0
503	YALI0F09185g	1
504	YALI0F09229g	0
505	YALI0F09251g	1
506	YALI0F09273g	1
507	YALI0F09339g	-3.65827e-12
508	YALI0F09405g	0.861941
509	YALI0F09449g	1
510	YALI0F09559g	1
511	YALI0F09603g	1
512	YALI0F09625g	1
513	YALI0F09966g	1
514	YALI0F10010g	1
515	YALI0F10857g	1
516	YALI0F10923g	1
517	YALI0F11297g	0
518	YALI0F11627g	1
519	YALI0F11759g	0
520	YALI0F11935g	0.999604
521	YALI0F12199g	1
522	YALI0F12639g	-3.82779e-26
523	YALI0F13453g	0.978097
524	YALI0F13541g	1
525	YALI0F13739g	1
526	YALI0F13937g	1
527	YALI0F14047g	1
528	YALI0F14729g	1
529	YALI0F15345g	1
530	YALI0F15433g	1
531	YALI0F15587g	1
532	YALI0F15631g	0.861941
533	YALI0F15983g	1
534	YALI0F16093g	1
535	YALI0F16181g	0.861941
536	YALI0F16401g	1
537	YALI0F16709g	1
538	YALI0F16819g	1
539	YALI0F16896g	1.55977e-12
540	YALI0F17248g	1
541	YALI0F17644g	-1.94593e-27
542	YALI0F17820g	1
543	YALI0F17842g	1
544	YALI0F17996g	1
545	YALI0F18359g	1
546	YALI0F18502g	1
547	YALI0F19184g	2.01967e-14
548	YALI0F19448g	1
549	YALI0F19470g	1
550	YALI0F19514g	1
551	YALI0F19712g	0.862205
552	YALI0F19866g	1
553	YALI0F20218g	1
554	YALI0F20262g	1
555	YALI0F20306g	0.861941
556	YALI0F20328g	0
557	YALI0F20702g	1
558	YALI0F20790g	1
559	YALI0F20900g	1
560	YALI0F21010g	-3.59398e-12
561	YALI0F21197g	1
562	YALI0F21406g	0.691681
563	YALI0F21527g	1.26266e-26
564	YALI0F22517g	1
565	YALI0F22605g	1
566	YALI0F22781g	1.26266e-26
567	YALI0F23023g	0
568	YALI0F23067g	1
569	YALI0F23221g	0.978097
570	YALI0F23243g	1
571	YALI0F23463g	1
572	YALI0F23551g	1
573	YALI0F23573g	1
574	YALI0F23749g	1
575	YALI0F23793g	1
576	YALI0F23837g	1
577	YALI0F23903g	1
578	YALI0F23947g	1
579	YALI0F24475g	0.861941
580	YALI0F24893g	0
581	YALI0F25047g	1
582	YALI0F25135g	1
583	YALI0F25201g	1
584	YALI0F25641g	1
585	YALI0F25773g	1
586	YALI0F25795g	1
587	YALI0F26125g	1
588	YALI0F26191g	1
589	YALI0F26323g	1
590	YALI0F26455g	1
591	YALI0F26521g	1
592	YALI0F26587g	1
593	YALI0F26609g	1
594	YALI0F27665g	0.999657
595	YALI0F27885g	1
596	YALI0F28765g	1
597	YALI0F29337g	1
598	YALI0F30019g	-2.03181e-11
599	YALI0F30129g	1
600	YALI0F30481g	-1.33374e-25
601	YALI0F30569g	1
602	YALI0F30679g	1
603	YALI0F30745g	1
604	YALI0F30987g	1
605	YALI0F31075g	-1.43542e-27
606	YALI0F31119g	0.861941
607	YALI0F31273g	1
608	YALI0F31735g	0
609	YALI0F31999g	1
610	YALIfMp01	1
611	YALIfMp02	1
612	YALIfMp16	1
613	YALIfMp19	1
614	YALIfMp20	1
615	YALIfMp28	1
616	YALIfMp29	1
617	YalifMp03	1
618	YalifMp05	1
619	YalifMp06	1

## Sheet: flux distribution of wild-type
reaction	flux
R0001	0
R0002	0
R0003	591.018
R0004	649.503
R0005	0.0621893
R0006	-0.0108478
R0007	-38.6907
R0008	0
R0009	0.0072304
R0010	0
R0011	0
R0026	0.0113746
R0027	0
R0028	0.0113746
R0029	0.0113746
R0030	0
R0031	0.0113746
R0032	0.0113746
R0033	0
R0034	0
R0041	0
R0042	0.0191494
R0043	0.012854
R0044	0
R0045	0
R0046	0
R0047	0
R0048	0
R0049	0.00642702
R0050	0
R0051	0
R0052	0.00629532
R0053	0.00642702
R0054	0.00642702
R0055	0.00642702
R0056	0
R0057	0.00642702
R0058	0
R0064	0.0191494
R0065	0.00642702
R0071	0
R0072	0.00629532
R0075	0
R0076	0
R0078	0
R0079	0.185936
R0080	0
R0081	0.185936
R0082	0
R0083	-0.00549194
R0084	0
R0085	0
R0086	0
R0087	0
R0088	38.7725
R0089	0
R0090	0
R0091	0
R0092	0
R0093	0
R0094	0
R0097	0
R0098	0
R0099	0
R0100	0
R0101	0
R0102	0
R0103	0
R0105	0
R0106	0
R0107	0
R0108	0
R0109	0
R0110	0
R0116	0
R0118	0
R0119	0
R0124	0
R0125	4.75836
R0126	0
R0127	4.75836
R0128	0
R0129	4.6632
R0130	0
R0131	0
R0132	3.09294
R0133	0
R0134	0
R0135	0
R0136	0
R0137	0
R0138	0
R0139	0
R0140	1.57026
R0141	4.75836
R0142	-4.3777
R0143	0.475836
R0144	0
R0145	1.28476
R0146	0.808922
R0147	0.237918
R0148	1.57026
R0149	4.23835e-28
R0150	0
R0151	0
R0152	-4.75836
R0153	0
R0154	0
R0155	0
R0156	0.428253
R0160	0
R0161	5.42454
R0162	345.208
R0163	0
R0164	0
R0165	0
R0166	4.3777
R0167	0
R0168	0.808922
R0169	0
R0170	0
R0171	0
R0172	0.237918
R0173	-4.3777
R0174	3.56877
R0175	0
R0176	-0.237918
R0177	0.808922
R0178	0.237918
R0179	0
R0180	0
R0181	0.0124458
R0182	0
R0183	0
R0184	0
R0191	0
R0192	0
R0193	0
R0194	0
R0195	0
R0196	0
R0197	2.55511e-27
R0198	2.55516e-27
R0199	-2.54414e-27
R0200	0
R0201	0
R0202	0
R0203	0
R0204	2.67194e-27
R0205	-2.61041e-27
R0206	-3.99329e-27
R0207	0
R0208	0
R0209	0
R0210	0
R0211	0
R0212	0
R0213	4.73941e-24
R0214	4.76399e-24
R0215	-4.60332e-24
R0216	0
R0217	0
R0218	0
R0219	0
R0220	0
R0221	0
R0222	0
R0223	0
R0224	0
R0225	0
R0226	0
R0227	0
R0228	0
R0229	0
R0230	0
R0231	0
R0232	0
R0233	0
R0234	0
R0235	0
R0236	0
R0237	0
R0238	0
R0239	0
R0240	0
R0241	0
R0242	0
R0243	0
R0244	0
R0245	0
R0246	0
R0247	-0.00107117
R0248	3.54349e-15
R0249	0
R0250	0
R0251	0
R0252	3.54349e-15
R0257	3.54349e-15
R0258	0
R0259	3.54349e-15
R0260	0
R0261	0.00309059
R0262	0
R0263	0.00309059
R0264	-0.00309059
R0265	0
R0266	0
R0267	0
R0268	0
R0269	0
R0271	38.6575
R0272	19.6926
R0273	38.6393
R0274	19.2085
R0275	0.0100444
R0276	-0.00415298
R0277	38.7684
R0278	38.6575
R0279	19.6926
R0280	38.6575
R0281	-38.6575
R0282	38.6575
R0284	19.4161
R0285	19.4161
R0286	19.4161
R0287	-19.6926
R0288	0
R0289	0
R0290	0
R0291	0
R0292	0
R0293	0
R0294	0
R0295	0
R0296	0
R0303	0
R0304	0
R0305	4.41219e-27
R0307	-7.19098e-28
R0308	1.64758
R0309	1.4632
R0310	0
R0311	0.014632
R0312	0
R0313	0
R0314	0
R0315	0
R0316	-5.23828e-27
R0317	-5.24257e-27
R0318	0
R0319	1.4632
R0320	-3.10417e-27
R0323	-5.25417e-27
R0324	-3.10474e-27
R0325	0
R0334	0.123799
R0335	1.64758
R0336	1.64758
R0337	0.178675
R0338	0.107117
R0339	0.0618996
R0341	-5.2623e-27
R0342	-3.10684e-27
R0343	0
R0344	0
R0345	0
R0346	0.0548755
R0347	0
R0348	0
R0349	0.0548755
R0350	3.82582e-29
R0351	0
R0352	0
R0353	0
R0354	0
R0355	0
R0356	0.0548755
R0357	0
R0358	0
R0359	0
R0360	0.0238379
R0361	38.6393
R0362	0
R0363	0
R0364	1.61746e-26
R0365	-0.0124458
R0366	0.173325
R0367	19.7164
R0368	1.47426
R0369	-19.7164
R0370	-0.0238379
R0371	20
R0374	-6.73038e-28
R0376	-35.3515
R0377	6.72887e-28
R0379	1.47426
R0380	0
R0381	1000
R0382	0
R0383	0.0319814
R0384	0
R0385	0
R0386	0
R0387	1000
R0388	1000
R0389	0.00415298
R0390	0.00415298
R0391	-0.00415298
R0392	0.00415298
R0393	0.00415298
R0394	0.00415298
R0396	0.00415298
R0398	0.00415298
R0399	0.00415298
R0400	0
R0401	0
R0402	0
R0403	0
R0404	0
R0405	0
R0414	0.00937274
R0415	0.00937274
R0416	-0.00937274
R0417	0.00937274
R0419	0.00937274
R0420	-0.00937274
R0421	0.00937274
R0422	0
R0423	0
R0424	0
R0428	0
R0430	0
R0431	0
R0432	0
R0433	-1.99317e-14
R0434	0
R0435	0.45483
R0436	0
R0437	475.936
R0438	0
R0439	0
R0440	5.59873e-14
R0441	0
R0442	6.98317e-26
R0443	0
R0444	6.9841e-26
R0445	0
R0446	0
R0447	0
R0448	0
R0449	0
R0450	-383.943
R0451	0
R0452	0.00134774
R0453	0
R0454	0.0164934
R0455	0.0164934
R0456	0
R0457	0
R0458	0
R0459	0
R0460	0
R0461	0.190089
R0462	0
R0463	0
R0465	0
R0466	0
R0467	0
R0468	0
R0469	0
R0470	0
R0471	0
R0472	0
R0473	0
R0474	0
R0475	0
R0476	0
R0477	0
R0478	0
R0479	0
R0481	0
R0482	-18.4439
R0483	55.284
R0484	36.8402
R0485	-18.426
R0486	0
R0487	18.426
R0488	-18.4141
R0489	55.284
R0490	55.284
R0492	0.0036569
R0493	0
R0494	0.00105361
R0495	0
R0496	0.00684407
R0497	0.0109971
R0498	-0.0109971
R0499	-0.00626898
R0500	0.00734015
R0501	0
R0502	0
R0503	0
R0504	0.00626898
R0505	-0.00734015
R0506	0.00684407
R0507	0
R0508	0
R0509	0
R0510	0.192205
R0511	0.241158
R0512	0
R0514	0.00309059
R0515	-5.01703e-26
R0516	0
R0517	0
R0518	0
R0519	0.00105361
R0520	-0.00105361
R0521	0.0188903
R0526	0
R0527	0.00734015
R0528	0
R0529	0
R0530	-0.00107117
R0531	0
R0532	0
R0533	0
R0534	0
R0535	0
R0536	0
R0537	0
R0538	0
R0539	0
R0540	5.59873e-14
R0542	7.8625
R0543	0
R0544	0
R0545	0
R0546	0
R0547	0
R0548	-0.00684407
R0549	0.00684407
R0550	0
R0551	0
R0552	0.00107117
R0553	0.00684407
R0554	0.00684407
R0555	0.00684407
R0556	0.0036569
R0557	0.00684407
R0558	0
R0559	0
R0561	-0.00642702
R0562	-0.00415298
R0563	0.00133896
R0564	-0.00133896
R0565	0.00642702
R0566	0.011919
R0567	0.01058
R0568	0.00415298
R0569	0.011919
R0570	0.011919
R0571	0.011919
R0572	0.011919
R0573	0.011919
R0574	0.011919
R0575	0.00133896
R0576	0.00133896
R0577	0
R0578	0
R0579	0
R0581	0
R0582	0
R0583	0
R0584	0
R0585	0
R0586	0
R0588	0
R0592	0
R0593	0
R0594	0
R0595	-3.80559e-29
R0596	0
R0597	311.424
R0598	-311.424
R0606	0.00319595
R0607	0
R0608	0.00548316
R0609	0.0097415
R0610	0.00107117
R0611	0.00548316
R0612	0.00107117
R0613	-0.00548316
R0614	0.00107117
R0615	0
R0616	0
R0617	0
R0618	-5.01702e-26
R0619	0
R0620	0
R0621	0
R0622	0
R0623	0
R0624	0
R0625	0
R0626	0
R0627	0
R0628	0
R0629	0
R0630	0
R0631	0
R0632	0
R0633	0.00481148
R0634	0.177059
R0635	0
R0636	0.0254359
R0637	0.177059
R0638	5.01986e-26
R0639	0
R0640	0
R0641	5.01986e-26
R0642	-0.00319595
R0647	0
R0648	0
R0649	0
R0650	0.00107117
R0651	-0.00548316
R0652	0
R0654	-0.00212478
R0655	0
R0656	0.00107117
R0657	0
R0658	0
R0659	0
R0660	0
R0661	0
R0662	0
R0663	0
R0664	0.00161553
R0665	0
R0666	0.0119102
R0667	0
R0668	-3.98634e-14
R0669	0
R0670	38.6393
R0671	-999.992
R0672	0
R0673	0
R0674	0
R0675	0.00808645
R0676	0
R0677	0
R0678	0
R0679	0
R0680	0
R0681	0
R0682	0
R0683	0
R0684	0
R0685	0
R0686	0
R0687	0.00549194
R0688	0.00549194
R0689	0.00549194
R0690	0.00549194
R0691	0
R0694	0
R0696	0
R0697	0
R0698	0
R0699	0
R0700	0
R0701	0
R0702	0
R0703	0
R0704	0
R0705	0
R0706	0
R0707	0
R0708	0
R0709	0
R0710	0
R0711	0
R0712	0
R0713	0
R0714	0
R0715	0
R0716	0
R0717	0
R0718	0
R0719	0
R0720	0
R0721	0
R0722	0
R0723	0
R0724	0
R0725	0
R0726	2.39581e-27
R0728	0
R0731	2.42871e-27
R0732	0
R0733	8.78008e-05
R0734	8.78008e-05
R0735	0
R0736	0
R0738	0.012358
R0741	0
R0742	0.00134774
R0743	0.00134774
R0744	0.00134774
R0746	0.00134774
R0747	0.00134774
R0748	0.00134774
R0750	0.000237062
R0751	0.000237062
R0754	0.00134774
R0755	0.00134774
R0756	0.00134774
R0757	0.000237062
R0758	0.000237062
R0759	0.000237062
R0760	0.00808645
R0761	0.00269548
R0762	0.00269548
R0763	0.00269548
R0764	0
R0765	0.00808645
R0766	0.00808645
R0767	0.00808645
R0768	5.08211e-19
R0769	0
R0770	0
R0771	0.0252471
R0772	0
R0773	0.0171607
R0774	0.0171607
R0775	0
R0777	0
R0778	0
R0779	38.7227
R0780	0.00778793
R0781	0.0171607
R0782	0.0397694
R0783	-0.00778793
R0784	0
R0785	-1000
R0786	-999.96
R0787	0
R0788	0
R0789	0.00778793
R0790	0
R0791	0
R0792	0
R0793	1.89741e-28
R0794	0
R0795	-1.89741e-28
R0796	0
R0797	0
R0798	0
R0799	0
R0800	0
R0801	0
R0802	0
R0803	0
R0804	4.34455e-29
R0805	2.69629e-29
R0806	8.29121e-29
R0807	0
R0809	0
R0810	0
R0813	0
R0814	0
R0815	0
R0816	0
R0817	0
R0821	0
R0823	0
R0827	0
R0829	0
R0834	-1000
R0835	1000
R0836	0
R0837	0
R0848	0.0203522
R0849	-0.0117829
R0850	0.0117829
R0851	-0.00267792
R0852	-0.00589143
R0853	0
R0854	0
R0855	0
R0856	0
R0857	0
R0858	0
R0859	0.0117829
R0860	0.0144608
R0861	0.0144608
R0862	0.00589143
R0863	-0.00589143
R0864	0.00589143
R0865	-0.0144608
R0866	0.0117829
R0867	-3.80559e-29
R0868	0
R0869	0
R0876	-1.21264e-29
R0877	3.80559e-29
R0878	0
R0879	3.80559e-29
R0880	0
R0883	3.80559e-29
R0884	-3.80559e-29
R0885	0
R0887	0.00642702
R0888	0
R0889	0
R0890	3.54349e-15
R0891	0
R0892	0
R0893	0.0618996
R0894	0.0618996
R0895	0
R0896	0
R0897	0
R0898	0
R0899	-0.00734015
R0900	0
R0901	0
R0902	5.59873e-14
R0903	0.00133896
R0904	0
R0905	5.017e-26
R0906	0
R0907	0.00549194
R0908	0
R0910	0
R0911	0
R0912	0
R0913	8.56713e-29
R0914	0
R0915	3.08085e-29
R0916	0
R0917	0
R0918	0
R0919	0
R0920	0
R0921	0
R0922	0
R0923	0
R0924	0.0117829
R0925	0
R0926	-3.80559e-29
R0927	-3.80559e-29
R0928	3.80559e-29
R0929	3.80559e-29
R0930	0
R0931	0
R0932	5.08211e-19
R0933	5.08211e-19
R0934	0
R0935	0.00309059
R0936	0.00309059
R0937	0
R0938	-3.80559e-29
R0939	3.80559e-29
R0940	0
R0941	0
R0942	0
R0943	0
R0944	0
R0945	0
R0946	0
R0947	0
R0948	0
R2000	0.0439004
R0949	0
R0950	0
R0951	0
R0952	0
R0953	0
R0954	0
R0955	0
R0956	-3.54349e-15
R0957	-3.54349e-15
R0958	0
R0959	0
R0960	0
R0961	0
R0962	0
R0963	0.00636995
R0964	0
R0965	0
R0966	0
R0967	0
R0968	0
R0969	0
R0970	0
R0971	0
R0972	0
R0973	0.00778793
R0974	0
R0975	0
R0976	0
R0977	0
R0978	2.82091
R0979	-1.99317e-14
R0980	0
R0981	0
R0982	0
R0983	-1.61746e-26
R0984	0
R0985	0
R0986	0
R0987	0.0171607
R0988	0
R0989	0.00642702
R0990	0
R0991	-0.00642702
R0992	0
R0993	-4.66107e-24
R0994	0
R0995	0
R0996	3.80559e-29
R0997	0
R0998	0
R0999	0.012854
R1000	0
R1001	-1000
R1003	0
R1004	0
R1005	0
R1006	0.0319814
R1007	0
R1008	0
R1009	-19.4161
R1010	-941.875
R1011	941.875
R1012	-0.0267792
R1013	0.0267792
R1014	0
R1015	4.60332e-24
R1016	0
R1017	0
R1018	0
R1019	2.54414e-27
R1020	0.45483
R1021	-2.55511e-27
R1022	-0.0171607
R1023	2.67194e-27
R1024	0
R1025	19.4161
R1026	0
R1027	0
R1029	0
R1030	0
R1031	0
R1032	0
R1033	-0.00548316
R1034	0.0249486
R1035	0
R1036	0
R1037	-1000
R1038	0
R1039	0
R1040	-999.965
R1041	0
R1042	0.196709
R1043	-524.979
R1044	0
R1045	1.00755e-25
R1046	0
R1047	0
R1048	0
R1049	0
R1050	0
R1051	0
R1052	0
R1053	1000
R1054	0
R1055	0
R1056	0.36796
R1057	-19.4161
R1058	-1000
R1059	1000
R1060	5.83874e-25
R1061	-1000
R1062	0
R1063	1000
R1064	0
R1065	0
R1066	0
R1067	0
R1068	0
R1069	-436.824
R1070	-43.0927
R1071	0
R1072	0
R1073	19.4161
R1074	0
R1075	0
R1076	0
R1077	0
R1078	0
R1079	-3.54349e-15
R1080	0
R1081	3.54349e-15
R1082	0
R1083	-36.1753
R1084	-19.4856
R1085	0
R1086	0
R1087	-999.968
R1088	475.912
R1089	0
R1090	0
R1091	-1000
R1092	0.0368237
R1093	0
R1094	0
R1095	-38.6393
R1096	0
R1097	-38.6393
R1098	0
R1099	0
R1100	-3.54349e-15
R1101	3.54349e-15
R1102	0
R1103	0
R1104	-0.00589143
R1105	-0.0144608
R1106	0
R1107	0.00937274
R1108	0.00589143
R1109	0
R1110	0
R1111	0
R1112	0
R1113	0
R1114	0
R1115	0
R1116	0
R1117	0
R1118	0
R1119	0
R1120	0
R1121	0
R1122	0
R1123	0
R1124	0
R1125	0
R1126	0
R1127	0
R1128	0
R1129	0
R1130	0
R1131	0
R1132	0
R1133	0
R1134	0
R1135	0
R1136	0
R1137	0
R1138	0
R1139	0
R1140	0
R1141	0
R1142	0
R1143	0
R1144	0
R1145	0
R1146	-5.59873e-14
R1147	0
R1148	0
R1149	0
R1150	0
R1151	0.273644
R1152	0.273644
R1153	0
R1154	0
R1155	0
R1156	0
R1157	0
R1158	0
R1159	0
R1160	0
R1161	0
R1162	0
R1163	0
R1164	0
R1165	0
R1166	0
R1167	0
R1168	20
R1170	0
R1171	0
R1172	0
R1173	0
R1174	1.28474e-13
R1175	0
R1176	0
R1177	0
R1178	0
R1179	0
R1180	0
R1181	0
R1182	0
R1183	0
R1184	0
R1185	0
R1186	-1.62053e-26
R1187	0
R1188	0
R1189	0
R1190	0
R1191	3.54349e-15
R1192	0
R1193	0
R1194	0
R1195	0
R1196	-0.00636995
R1197	0
R1198	0
R1199	0
R1200	0
R1201	0
R1202	0
R1203	0
R1204	-2.82091
R1205	0
R1206	0
R1207	1.62053e-26
R1208	0.00548316
R1209	0
R1210	0
R1211	-0.196709
R1212	0
R1213	0
R1214	0
R1215	0
R1216	0
R1217	0
R1218	-0.36796
R1219	0
R1220	0
R1221	43.0927
R1222	0
R1223	0
R1224	0
R1225	0
R1226	0
R1227	0
R1228	36.1753
R1229	0
R1230	0
R1231	0
R1232	0
R1233	0
R1234	0
R1235	-3.54349e-15
R1236	0
R1237	0
R1238	0
R1239	0
R1240	0
R1241	0
R1242	0
R1243	0
R1244	0
R1245	0
R1246	0
R1247	0
R1248	0
R1249	0
R1250	0
R1251	0
R1252	0
R1253	0
R1254	0
R1255	0
R1256	0
R1257	0
R1258	0
R1259	0
R1260	0
R1261	0
R1262	0
R1263	0
R1264	0
R1265	0
R1266	0
R1267	0
R1268	0
R1269	0
R1270	0
R1271	0
R1272	0
R1273	0
R1274	5.59873e-14
R1275	0
R1276	0
R1277	0
R1278	0
R1279	0
R1280	0
R1281	0
R1282	0
R1283	0
R1284	0
R1285	0
R1286	0
R1287	0
R1288	0
R1289	0
R1290	0
R1291	0
R1292	0
R1293	0
R1294	-20
R1296	0
R1297	0
R1298	0
R1299	1.28474e-13
R1300	0
R1301	0
R1302	0
R1303	0
R1304	0
R1305	0.0824186
R1306	0
R1307	0
R1308	0
R1309	0
R1310	0
R1311	0
R1312	0.00548316
R1313	0.190089
R1314	0
R1315	1.33599e-27
R1316	-4.41219e-27
R1323	9.52358e-28
R1324	0
R1325	0

## Sheet: Non-essentialgenes
ID	gene ID
1	YALI0A00264g
2	YALI0A01133g
3	YALI0A01870g
5	YALI0A02541g
6	YALI0A02915g
8	YALI0A05379g
10	YALI0A08041g
11	YALI0A08217g
12	YALI0A08668g
13	YALI0A09042g
16	YALI0A10032g
18	YALI0A10310g
21	YALI0A12045g
22	YALI0A12353g
23	YALI0A12573g
25	YALI0A14498g
28	YALI0A15147g
30	YALI0A15972g
31	YALI0A16379g
32	YALI0A16698g
34	YALI0A18183g
36	YALI0A19206g
37	YALI0A19558g
38	YALI0A20108g
39	YALI0A20680g
40	YALI0A21153g
42	YALI0B00220g
43	YALI0B00572g
45	YALI0B00726g
46	YALI0B00792g
47	YALI0B00836g
48	YALI0B01298g
50	YALI0B01826g
51	YALI0B02178g
52	YALI0B02376g
53	YALI0B02728g
54	YALI0B02852g
55	YALI0B02948g
56	YALI0B03124g
58	YALI0B03564g
61	YALI0B04202g
66	YALI0B06006g
68	YALI0B06941g
72	YALI0B08536g
73	YALI0B08943g
74	YALI0B08965g
75	YALI0B09515g
76	YALI0B09537g
77	YALI0B09647g
78	YALI0B10340g
79	YALI0B10406g
80	YALI0B11044g
81	YALI0B11154g
82	YALI0B11330g
83	YALI0B12078g
84	YALI0B13420g
85	YALI0B13552g
86	YALI0B13970g
88	YALI0B14465g
90	YALI0B14619g
91	YALI0B14729g
92	YALI0B14861g
93	YALI0B14927g
94	YALI0B15059g
97	YALI0B15598g
98	YALI0B15884g
101	YALI0B16324g
102	YALI0B16390g
103	YALI0B16522g
104	YALI0B17204g
109	YALI0B17688g
112	YALI0B18759g
113	YALI0B18898g
114	YALI0B19338g
115	YALI0B19382g
116	YALI0B19998g
117	YALI0B20020g
118	YALI0B20372g
119	YALI0B20438g
120	YALI0B21142g
123	YALI0B21846g
124	YALI0B22066g
125	YALI0B22308g
126	YALI0B22440g
127	YALI0B22506g
128	YALI0B22550g
129	YALI0B22902g
130	YALI0B22924g
135	YALI0C00451g
136	YALI0C01111g
137	YALI0C01411g
138	YALI0C01419g
139	YALI0C01716g
140	YALI0C01859g
141	YALI0C02431g
142	YALI0C03025g
143	YALI0C03179g
144	YALI0C03201g
145	YALI0C04180g
146	YALI0C04433g
148	YALI0C05753g
149	YALI0C05951g
150	YALI0C06083g
151	YALI0C06303g
153	YALI0C06490g
155	YALI0C06798g
156	YALI0C06952g
157	YALI0C06996g
159	YALI0C07678g
160	YALI0C08074g
161	YALI0C08811g
163	YALI0C10780g
165	YALI0C10989g
166	YALI0C11363g
167	YALI0C11407g
168	YALI0C11803g
169	YALI0C11880g
171	YALI0C13090g
172	YALI0C13354g
173	YALI0C13574g
174	YALI0C14344g
175	YALI0C15554g
177	YALI0C16522g
178	YALI0C16885g
179	YALI0C16995g
180	YALI0C17831g
181	YALI0C18205g
182	YALI0C18315g
183	YALI0C18425g
184	YALI0C18755g
185	YALI0C18799g
186	YALI0C19085g
187	YALI0C19195g
188	YALI0C19712g
189	YALI0C19866g
190	YALI0C20405g
191	YALI0C20427g
192	YALI0C20669g
193	YALI0C22088g
195	YALI0C22616g
196	YALI0C22792g
197	YALI0C23210g
198	YALI0C23342g
199	YALI0C23364g
201	YALI0C23617g
202	YALI0C23859g
203	YALI0C23969g
205	YALI0C24233g
206	YALI0C24255g
207	YALI0C24354g
209	YALI0D00605g
210	YALI0D00737g
213	YALI0D01309g
214	YALI0D02321g
215	YALI0D02497g
219	YALI0D03179g
221	YALI0D03480g
222	YALI0D04026g
224	YALI0D04741g
225	YALI0D04939g
226	YALI0D05467g
227	YALI0D05621g
228	YALI0D05797g
229	YALI0D06237g
231	YALI0D06303g
232	YALI0D06325g
233	YALI0D06501g
234	YALI0D06798g
235	YALI0D06974g
236	YALI0D07216g
237	YALI0D07370g
238	YALI0D07392g
239	YALI0D07942g
240	YALI0D07986g
241	YALI0D08382g
243	YALI0D08690g
244	YALI0D09229g
245	YALI0D09361g
246	YALI0D09867g
247	YALI0D10131g
249	YALI0D10813g
257	YALI0D12661g
258	YALI0D13024g
262	YALI0D14322g
264	YALI0D14850g
266	YALI0D15598g
268	YALI0D16445g
269	YALI0D16753g
270	YALI0D16797g
271	YALI0D17050g
272	YALI0D17072g
273	YALI0D17402g
275	YALI0D17534g
276	YALI0D17556g
277	YALI0D17864g
279	YALI0D18271g
280	YALI0D18337g
282	YALI0D19030g
283	YALI0D19140g
284	YALI0D19184g
286	YALI0D19426g
290	YALI0D21010g
291	YALI0D21032g
293	YALI0D21604g
295	YALI0D22396g
296	YALI0D22484g
299	YALI0D23331g
301	YALI0D23683g
302	YALI0D23815g
304	YALI0D24585g
305	YALI0D24607g
306	YALI0D24750g
307	YALI0D25168g
308	YALI0D25476g
309	YALI0D25564g
310	YALI0D25630g
311	YALI0D25938g
312	YALI0D26147g
314	YALI0D27016g
317	YALI0E00264g
319	YALI0E00638g
320	YALI0E00836g
321	YALI0E01056g
323	YALI0E02090g
324	YALI0E02244g
325	YALI0E02288g
326	YALI0E02310g
327	YALI0E02398g
328	YALI0E02684g
331	YALI0E03212g
332	YALI0E04048g
333	YALI0E04202g
334	YALI0E04224g
337	YALI0E05137g
338	YALI0E05203g
339	YALI0E05599g
340	YALI0E05753g
341	YALI0E05929g
344	YALI0E06413g
347	YALI0E07073g
348	YALI0E07271g
349	YALI0E07535g
350	YALI0E08536g
352	YALI0E09108g
354	YALI0E09603g
356	YALI0E11099g
358	YALI0E11385g
359	YALI0E11495g
360	YALI0E11671g
363	YALI0E12463g
364	YALI0E12573g
365	YALI0E12683g
367	YALI0E14102g
368	YALI0E14190g
370	YALI0E14685g
371	YALI0E14751g
372	YALI0E14949g
373	YALI0E15081g
374	YALI0E15125g
375	YALI0E15224g
376	YALI0E15488g
377	YALI0E15708g
379	YALI0E16060g
381	YALI0E16346g
383	YALI0E16434g
384	YALI0E16643g
385	YALI0E16797g
386	YALI0E16907g
387	YALI0E16929g
388	YALI0E17347g
389	YALI0E17479g
390	YALI0E17633g
391	YALI0E17787g
392	YALI0E18029g
393	YALI0E18238g
394	YALI0E18568g
395	YALI0E18634g
396	YALI0E18898g
397	YALI0E18942g
398	YALI0E18964g
399	YALI0E20163g
400	YALI0E20207g
401	YALI0E20361g
402	YALI0E20471g
403	YALI0E20603g
404	YALI0E20625g
405	YALI0E20713g
407	YALI0E21021g
408	YALI0E21197g
409	YALI0E21307g
410	YALI0E21351g
411	YALI0E22198g
412	YALI0E22649g
413	YALI0E23089g
415	YALI0E24013g
416	YALI0E24057g
417	YALI0E24167g
418	YALI0E24497g
419	YALI0E24607g
420	YALI0E25652g
421	YALI0E25740g
423	YALI0E26719g
424	YALI0E26829g
425	YALI0E27005g
428	YALI0E28153g
429	YALI0E28963g
430	YALI0E29161g
433	YALI0E29975g
434	YALI0E30129g
435	YALI0E30283g
436	YALI0E30481g
437	YALI0E30965g
438	YALI0E31009g
440	YALI0E31086g
442	YALI0E31515g
443	YALI0E31766g
444	YALI0E32065g
445	YALI0E32351g
446	YALI0E32527g
447	YALI0E32681g
449	YALI0E33143g
450	YALI0E33517g
452	YALI0E34265g
453	YALI0E34672g
454	YALI0E34749g
455	YALI0E34771g
456	YALI0E35222g
457	YALI0F00462g
458	YALI0F00484g
459	YALI0F00506g
460	YALI0F00924g
461	YALI0F01584g
462	YALI0F01606g
463	YALI0F01628g
464	YALI0F01672g
465	YALI0F02013g
466	YALI0F02123g
467	YALI0F02299g
468	YALI0F02607g
472	YALI0F03663g
474	YALI0F04095g
475	YALI0F04169g
477	YALI0F04444g
478	YALI0F04532g
480	YALI0F05038g
481	YALI0F05126g
483	YALI0F05214g
484	YALI0F05390g
485	YALI0F05500g
486	YALI0F05610g
488	YALI0F05874g
489	YALI0F05962g
490	YALI0F06050g
491	YALI0F06424g
492	YALI0F06468g
493	YALI0F06710g
494	YALI0F06820g
495	YALI0F06842g
496	YALI0F07062g
497	YALI0F07260g
498	YALI0F07711g
499	YALI0F07821g
500	YALI0F08217g
501	YALI0F08415g
503	YALI0F09185g
505	YALI0F09251g
506	YALI0F09273g
509	YALI0F09449g
510	YALI0F09559g
511	YALI0F09603g
512	YALI0F09625g
513	YALI0F09966g
514	YALI0F10010g
515	YALI0F10857g
516	YALI0F10923g
518	YALI0F11627g
521	YALI0F12199g
524	YALI0F13541g
525	YALI0F13739g
526	YALI0F13937g
527	YALI0F14047g
528	YALI0F14729g
529	YALI0F15345g
530	YALI0F15433g
531	YALI0F15587g
533	YALI0F15983g
534	YALI0F16093g
536	YALI0F16401g
537	YALI0F16709g
538	YALI0F16819g
540	YALI0F17248g
542	YALI0F17820g
543	YALI0F17842g
544	YALI0F17996g
545	YALI0F18359g
546	YALI0F18502g
548	YALI0F19448g
549	YALI0F19470g
550	YALI0F19514g
552	YALI0F19866g
553	YALI0F20218g
554	YALI0F20262g
557	YALI0F20702g
558	YALI0F20790g
559	YALI0F20900g
561	YALI0F21197g
564	YALI0F22517g
565	YALI0F22605g
568	YALI0F23067g
570	YALI0F23243g
571	YALI0F23463g
572	YALI0F23551g
573	YALI0F23573g
574	YALI0F23749g
575	YALI0F23793g
576	YALI0F23837g
577	YALI0F23903g
578	YALI0F23947g
581	YALI0F25047g
582	YALI0F25135g
583	YALI0F25201g
584	YALI0F25641g
585	YALI0F25773g
586	YALI0F25795g
587	YALI0F26125g
588	YALI0F26191g
589	YALI0F26323g
590	YALI0F26455g
591	YALI0F26521g
592	YALI0F26587g
593	YALI0F26609g
595	YALI0F27885g
596	YALI0F28765g
597	YALI0F29337g
599	YALI0F30129g
601	YALI0F30569g
602	YALI0F30679g
603	YALI0F30745g
604	YALI0F30987g
607	YALI0F31273g
609	YALI0F31999g
610	YALIfMp01
611	YALIfMp02
612	YALIfMp16
613	YALIfMp19
614	YALIfMp20
615	YALIfMp28
616	YALIfMp29
617	YalifMp03
618	YalifMp05
619	YalifMp06

## Sheet: maximum flux of FVA
reaction gene	wildtype	YALI0A00264g	YALI0A01133g	YALI0A01870g	YALI0A02541g	YALI0A02915g	YALI0A05379g	YALI0A08041g	YALI0A08217g	YALI0A08668g	YALI0A09042g	YALI0A10032g	YALI0A10310g	YALI0A12045g	YALI0A12353g	YALI0A12573g	YALI0A14498g	YALI0A15147g	YALI0A15972g	YALI0A16379g	YALI0A16698g	YALI0A18183g	YALI0A19206g	YALI0A19558g	YALI0A20108g	YALI0A20680g	YALI0A21153g	YALI0B00220g	YALI0B00572g	YALI0B00726g	YALI0B00792g	YALI0B00836g	YALI0B01298g	YALI0B01826g	YALI0B02178g	YALI0B02376g	YALI0B02728g	YALI0B02852g	YALI0B02948g	YALI0B03124g	YALI0B03564g	YALI0B04202g	YALI0B06006g	YALI0B06941g	YALI0B08536g	YALI0B08943g	YALI0B08965g	YALI0B09515g	YALI0B09537g
R0001	501.63	501.63	501.63	501.63	501.63	501.629	501.63	501.63	501.63	501.63	501.63	501.63	501.63	501.63	501.63	501.63	501.63	501.63	501.63	501.63	501.63	501.357	501.63	501.63	501.63	501.629	501.63	501.63	501.63	501.63	501.629	501.63	501.63	501.63	501.63	501.63	501.63	501.63	501.63	501.63	501.63	501.63	501.63	501.63	501.63	501.63	501.63	501.63	501.63
R0002	501.63	501.63	501.63	501.63	501.63	501.629	501.63	501.63	501.63	501.63	501.63	501.63	501.63	501.63	501.63	501.63	501.63	501.63	501.63	501.63	501.63	501.357	501.63	501.63	501.63	501.629	501.63	501.63	501.63	501.63	501.629	501.63	501.63	501.63	501.63	501.63	501.63	501.63	501.63	501.63	501.63	501.63	501.63	501.63	501.63	501.63	501.63	501.63	501.63
R0003	1000	1000	1000	1000	1000	1000	1000	1000	1000	1000	1000	1000	1000	1000	1000	1000	1000	1000	1000	1000	1000	1000	1000	1000	1000	1000	1000	1000	1000	1000	1000	1000	1000	1000	1000	1000	1000	1000	1000	1000	1000	1000	1000	1000	1000	1000	1000	1000	1000
R0004	1000	1000	1000	1000	1000	1000	1000	1000	1000	1000	1000	1000	1000	1000	1000	1000	1000	1000	1000	1000	1000	1000	1000	1000	1000	1000	1000	1000	1000	1000	1000	1000	1000	1000	1000	1000	1000	1000	999.811	1000	1000	1000	1000	1000	1000	1000	1000	1000	1000
R0005	501.693	501.693	501.693	501.693	501.693	501.691	501.693	501.693	501.693	501.693	501.693	501.693	501.693	501.693	501.693	501.693	501.693	501.693	501.693	501.693	501.693	501.419	501.693	501.693	501.693	501.691	501.693	501.693	501.693	501.693	501.691	501.693	501.693	501.693	501.693	501.693	501.693	501.693	501.693	501.693	501.693	501.693	501.693	501.693	501.693	501.693	501.693	501.693	501.693
R0006	200.641	200.641	200.641	200.641	200.641	200.641	200.641	200.641	200.641	200.641	200.641	200.641	200.641	200.641	200.641	200.641	200.641	200.641	200.641	200.641	200.641	200.532	200.641	200.641	200.641	200.641	200.641	200.641	200.641	200.641	200.641	200.641	200.641	200.641	200.641	200.641	200.641	200.641	200.641	200.641	200.641	200.641	200.641	200.641	200.641	200.641	200.641	200.641	200.641
R0007	-1.83396	-1.83396	-1.83396	-1.83396	-1.83396	-1.83396	-1.83396	-1.83396	-1.83396	-1.83396	-1.83396	-1.83396	-1.83396	-1.83396	-1.83396	-1.83396	-1.83396	-1.83396	-1.83396	-1.83396	-1.83396	-1.83396	-1.83396	-1.83396	-1.83396	-1.83396	-1.83396	-1.83396	-1.83396	-1.83396	-1.83396	-1.83396	-1.83396	-1.83396	-1.83396	-1.83396	-1.83396	-1.83396	-1.83396	-1.83396	-1.83396	-1.83396	-1.83396	-1.83396	-1.83396	-1.83396	-1.83396	-1.83396	-1.83396
R0008	1000	1000	1000	1000	1000	1000	1000	1000	1000	1000	1000	1000	1000	1000	1000	1000	1000	1000	1000	1000	1000	1000	1000	1000	1000	1000	1000	1000	1000	1000	1000	1000	1000	1000	1000	1000	1000	1000	1000	1000	1000	1000	1000	1000	1000	1000	1000	1000	1000
R0009	0.00759753	0.00759753	0.00759753	0.00759753	0.00759753	0.00759753	0.00759753	0.00759753	0.00759753	0.00759753	0.00759753	0.00759753	0.00759753	0.00759753	0.00759753	0.00759753	0.00759753	0.00759753	0.00759753	0.00759753	0.00759753	0.00759753	0.00759753	0.00759753	0.00759753	0.00759753	0.00759753	0.00759753	0.00759753	0.00759753	0.00759753	0.00759753	0.00759753	0.00759753	0.00759753	0.00759753	0.00759753	0.00759753	0.00759753	0.00759753	0.00759753	0.00759753	0.00759753	0.00759753	0.00759753	0.00759753	0.00759753	0.00759753	0.00759753
R0010	751.624	751.624	751.624	751.624	751.624	751.623	751.624	751.624	751.624	751.624	751.624	751.624	751.624	751.624	751.624	751.624	751.624	751.624	751.624	751.624	751.624	751.35	499.987	751.624	751.624	751.623	751.624	751.624	751.624	751.624	751.623	751.624	751.624	751.624	751.624	751.624	751.624	751.624	751.624	751.624	751.624	751.624	751.624	751.624	751.624	751.624	751.624	751.624	751.624
R0011	751.624	751.624	751.624	751.624	751.624	751.623	751.624	751.624	751.624	751.624	751.624	751.624	751.624	751.624	751.624	751.624	751.624	751.624	751.624	751.624	751.624	751.35	499.987	751.624	751.624	751.623	751.624	751.624	751.624	751.624	751.623	751.624	751.624	751.624	751.624	751.624	751.624	751.624	751.624	751.624	751.624	751.624	751.624	751.624	751.624	751.624	751.624	751.624	751.624
R0026	286.657	286.657	286.657	286.657	286.657	286.656	286.657	286.657	286.657	286.657	286.657	286.657	286.657	286.657	286.657	286.657	286.657	286.657	286.657	286.657	286.657	286.501	286.657	286.657	286.657	286.656	286.657	286.657	286.657	286.657	286.656	286.657	286.657	286.657	286.657	286.657	286.657	286.657	286.657	286.657	286.657	286.657	286.657	286.657	286.657	286.657	286.657	286.657	286.657
R0027	501.63	501.63	501.63	501.63	501.63	501.629	501.63	501.63	501.63	501.63	501.63	501.63	501.63	501.63	501.63	501.63	501.63	501.63	501.63	501.63	501.63	501.357	501.63	501.63	501.63	501.629	501.63	501.63	501.63	501.63	501.629	501.63	501.63	501.63	501.63	501.63	501.63	501.63	501.63	501.63	501.63	501.63	501.63	501.63	501.63	501.63	501.63	501.63	501.63
R0028	501.642	501.642	501.642	501.642	501.642	501.64	501.642	501.642	501.642	501.642	501.642	501.642	501.642	501.642	501.642	501.642	501.642	501.642	501.642	501.642	501.642	501.368	501.642	501.642	501.642	501.64	501.642	501.642	501.642	501.642	501.64	501.642	501.642	501.642	501.642	501.642	501.642	501.642	501.642	501.642	501.642	501.642	501.642	501.642	501.642	501.642	501.642	501.642	501.642
R0029	1000	1000	1000	1000	1000	1000	1000	1000	1000	1000	1000	1000	1000	1000	1000	1000	1000	1000	1000	1000	1000	1000	1000	1000	1000	1000	1000	1000	1000	1000	1000	1000	1000	1000	1000	1000	1000	1000	1000	1000	1000	1000	1000	1000	1000	1000	1000	1000	1000
R0030	999.989	999.989	999.989	999.989	999.989	999.989	999.989	999.989	999.989	999.989	999.989	999.989	999.989	999.989	999.989	999.989	999.989	999.989	999.989	999.989	999.989	999.989	999.989	999.989	999.989	999.989	999.989	999.989	999.989	999.989	999.989	999.989	999.989	999.989	999.989	999.989	999.989	999.989	999.989	999.989	999.989	999.989	999.989	999.989	999.989	999.989	999.989	999.989	999.989
R0031	286.657	286.657	286.657	286.657	286.657	286.656	286.657	286.657	286.657	286.657	286.657	286.657	286.657	286.657	286.657	286.657	286.657	286.657	286.657	286.657	286.657	286.501	286.657	286.657	286.657	286.656	286.657	286.657	286.657	286.657	286.656	286.657	286.657	286.657	286.657	286.657	286.657	286.657	286.657	286.657	286.657	286.657	286.657	286.657	286.657	286.657	286.657	286.657	286.657
R0032	286.657	286.657	286.657	286.657	286.657	286.656	286.657	286.657	286.657	286.657	286.657	286.657	286.657	286.657	286.657	286.657	286.657	286.657	286.657	286.657	286.657	286.501	286.657	286.657	286.657	286.656	286.657	286.657	286.657	286.657	286.656	286.657	286.657	286.657	286.657	286.657	286.657	286.657	286.657	286.657	286.657	286.657	286.657	286.657	286.657	286.657	286.657	286.657	286.657
R0033	0	0	0	0	0	0	0	0	0	0	0	0	0	0	0	0	0	0	0	0	0	0	0	0	0	0	0	0	0	0	0	0	0	0	0	0	0	0	0	0	0	0	0	0	0	0	0	0	0
R0034	286.646	286.646	286.646	286.646	286.646	286.645	286.646	286.646	286.646	286.646	286.646	286.646	286.646	286.646	286.646	286.646	286.646	286.646	286.646	286.646	286.646	286.49	286.646	286.646	286.646	286.645	286.646	286.646	286.646	286.646	286.645	286.646	286.646	286.646	286.646	286.646	286.646	286.646	286.646	286.646	286.646	286.646	286.646	286.646	286.646	286.646	286.646	286.646	286.646
R0041	87.2401	87.2401	87.2401	87.2401	87.2401	87.2398	87.2401	87.2401	87.2401	87.2401	87.2401	87.2401	87.2401	87.2401	87.2401	87.2401	87.2401	87.2401	87.2401	87.2401	87.2401	87.1925	87.2401	87.2401	87.2401	87.2398	87.2401	87.2401	87.2401	87.2401	87.2398	87.2401	87.2401	87.2401	87.2401	87.2401	87.2401	87.2401	87.2401	87.2401	87.2401	87.2401	87.2401	87.2401	87.2401	87.2401	87.2401	87.2401	87.2401
R0042	501.633	501.633	501.633	501.633	501.633	501.632	501.633	501.633	501.633	501.633	501.633	501.633	501.633	501.633	501.633	501.633	501.633	501.633	501.633	501.633	501.633	501.36	0	501.633	501.633	501.632	501.633	501.633	501.633	501.633	501.632	501.633	501.633	501.633	501.633	501.633	501.633	501.633	501.633	501.633	501.633	501.633	501.633	501.633	501.633	501.633	501.633	501.633	501.633
R0043	501.63	501.63	501.63	501.63	501.63	501.629	501.63	501.63	501.63	501.63	501.63	501.63	501.63	501.63	501.63	501.63	501.63	501.63	501.63	501.63	501.63	501.357	501.63	501.63	501.63	501.629	501.63	501.63	501.63	501.63	501.629	501.63	501.63	501.63	501.63	501.63	501.63	501.63	501.63	501.63	501.63	501.63	501.63	501.63	501.63	501.63	501.63	501.63	501.63
R0044	9.23523e-19	9.23523e-19	9.23523e-19	9.23523e-19	9.23523e-19	9.23523e-19	-2.29599e-19	9.23523e-19	9.23523e-19	9.23523e-19	0	9.23523e-19	9.23523e-19	9.23523e-19	9.23523e-19	9.23523e-19	0	9.23523e-19	9.23523e-19	9.23523e-19	0	9.23523e-19	0	9.23523e-19	8.23843e-19	9.23523e-19	9.23523e-19	9.23523e-19	9.23523e-19	9.23523e-19	9.23523e-19	9.23523e-19	9.23523e-19	9.23523e-19	9.23523e-19	9.23523e-19	9.23523e-19	9.23523e-19	9.23523e-19	9.23523e-19	9.23523e-19	4.09956e-19	9.23523e-19	9.23523e-19	9.23523e-19	9.23523e-19	9.23523e-19	9.23523e-19	9.23523e-19
R0045	105.606	105.606	105.606	105.606	105.606	105.606	105.606	105.606	105.606	105.606	105.606	105.606	105.606	105.606	105.606	105.606	105.606	105.606	105.606	105.606	105.606	105.549	105.606	105.606	105.606	105.606	105.606	105.606	105.606	105.606	105.606	105.606	105.606	105.606	105.606	105.606	105.606	105.606	105.606	105.606	105.606	87.2401	105.606	105.606	105.606	105.606	105.606	105.606	105.606
R0046	667.751	667.751	667.751	667.751	667.751	667.75	667.751	667.751	667.751	667.751	667.751	667.751	667.751	667.751	667.751	667.751	667.751	667.751	667.751	667.751	667.751	667.569	667.751	667.751	667.751	667.75	667.751	667.751	667.751	667.751	667.75	667.751	667.751	667.751	667.751	667.751	667.751	667.751	667.751	667.751	667.751	667.751	667.751	667.751	667.751	667.751	667.751	667.751	667.751
R0047	0.000244802	0.000244802	0.000244802	0.000244802	0.000244802	0.000244802	0.000244802	0.000244802	0.000244802	0.000244802	0.000244802	0.000244802	0.000244802	0.000244802	0.000244802	0.000244802	0.000200293	0.000244802	0.000244802	0.000244802	0.000200293	0.000244802	0.000244802	0.000244802	0.000244802	0.000244802	0.000244802	0.000244802	0.000244802	0.000200293	0.000244802	0.000244802	0.000244802	0.000244802	0.000244802	0.000244802	0.000244802	0.000244802	0.000244802	0.000244802	0.000244802	0.000244802	0.000244802	0.000244802	0.000244802	0.000244802	0.000244802	0.000244802	0.000244802
R0048	87.2401	87.2401	87.2401	87.2401	87.2401	87.2398	87.2401	87.2401	87.2401	87.2401	87.2401	87.2401	87.2401	87.2401	87.2401	87.2401	87.2401	87.2401	87.2401	87.2401	87.2401	87.1925	87.2401	87.2401	87.2401	87.2398	87.2401	87.2401	87.2401	87.2401	87.2398	87.2401	87.2401	87.2401	87.2401	87.2401	87.2401	87.2401	87.2401	87.2401	87.2401	87.2401	87.2401	87.2401	87.2401	87.2401	87.2401	87.2401	87.2401
R0049	105.613	105.613	105.613	105.613	105.613	105.613	105.613	105.613	105.613	105.613	105.613	105.613	105.613	105.613	105.613	105.613	105.613	105.613	105.613	105.613	105.613	105.555	105.613	105.613	105.613	105.613	105.613	105.613	105.613	105.613	105.613	105.613	105.613	105.613	105.613	105.613	105.613	105.613	105.613	105.613	105.613	87.2465	105.613	105.613	105.613	105.613	105.613	105.613	105.613
R0050	0	0	0	0	0	0	0	0	0	0	0	0	0	0	0	0	0	0	0	0	0	0	0	0	0	0	0	0	0	0	0	0	0	0	0	0	0	0	0	0	0	0	0	0	0	0	0	0	0
R0051	999.994	999.994	999.994	999.994	999.994	999.994	999.994	999.994	999.994	999.994	999.994	999.994	999.994	999.994	999.994	999.994	999.994	999.994	999.994	999.994	999.994	999.994	999.994	999.994	999.994	999.994	999.994	999.994	999.994	999.994	999.994	999.994	999.994	999.994	999.994	999.994	999.994	999.994	999.994	999.994	999.994	999.994	999.994	999.994	999.994	999.994	999.994	999.994	999.994
R0052	1000	1000	1000	1000	1000	1000	1000	1000	1000	1000	1000	1000	1000	1000	1000	1000	1000	1000	1000	1000	1000	1000	1000	1000	1000	1000	1000	1000	1000	1000	1000	1000	1000	1000	1000	1000	1000	1000	1000	1000	1000	1000	1000	1000	1000	1000	1000	1000	1000
R0053	105.613	105.613	105.613	105.613	105.613	105.613	105.613	105.613	105.613	105.613	105.613	105.613	105.613	105.613	105.613	105.613	105.613	105.613	105.613	105.613	105.613	105.555	105.613	105.613	105.613	105.613	105.613	105.613	105.613	105.613	105.613	105.613	105.613	105.613	105.613	105.613	105.613	105.613	105.613	105.613	105.613	87.2465	105.613	105.613	105.613	105.613	105.613	105.613	105.613
R0054	667.758	667.758	667.758	667.758	667.758	667.757	667.758	667.758	667.758	667.758	667.758	667.758	667.758	667.758	667.758	667.758	667.758	667.758	667.758	667.758	667.758	667.575	667.758	667.758	667.758	667.757	667.758	667.758	667.758	667.758	667.757	667.758	667.758	667.758	667.758	667.758	667.758	667.758	667.758	667.758	667.758	667.758	667.758	667.758	667.758	667.758	667.758	667.758	667.758
R0055	667.758	667.758	667.758	667.758	667.758	667.757	667.758	667.758	667.758	667.758	667.758	667.758	667.758	667.758	667.758	667.758	667.758	667.758	667.758	667.758	667.758	667.575	667.758	667.758	667.758	667.757	667.758	667.758	667.758	667.758	667.757	667.758	667.758	667.758	667.758	667.758	667.758	667.758	667.758	667.758	667.758	667.758	667.758	667.758	667.758	667.758	667.758	667.758	667.758
R0056	0.000244802	0.000244802	0.000244802	0.000244802	0.000244802	0.000244802	0.000244802	0.000244802	0.000244802	0.000244802	0.000244802	0.000244802	0.000244802	0.000244802	0.000244802	0.000244802	0	0.000244802	0.000244802	0.000244802	0	0.000244802	0.000244802	0.000244802	0.000244802	0.000244802	0.000244802	0.000244802	0.000244802	0	0.000244802	0.000244802	0.000244802	0.000244802	0.000244802	0.000244802	0.000244802	0.000244802	0.000244802	0.000244802	0.000244802	0.000244802	0.000244802	0.000244802	0.000244802	0.000244802	0.000244802	0.000244802	0.000244802
R0057	667.758	667.758	667.758	667.758	667.758	667.757	667.758	667.758	667.758	667.758	667.758	667.758	667.758	667.758	667.758	667.758	667.758	667.758	667.758	667.758	667.758	667.575	667.758	667.758	667.758	667.757	667.758	667.758	667.758	667.758	667.757	667.758	667.758	667.758	667.758	667.758	667.758	667.758	667.758	667.758	667.758	667.758	667.758	667.758	667.758	667.758	667.758	667.758	667.758
R0058	0	0	0	0	0	0	0	0	0	0	0	0	0	0	0	0	0	0	0	0	0	0	0	0	0	0	0	0	0	0	0	0	0	0	0	0	0	0	0	0	0	0	0	0	0	0	0	0	0
R0064	501.633	501.633	501.633	501.633	501.633	501.632	501.633	501.633	501.633	501.633	501.633	501.633	501.633	501.633	501.633	501.633	501.633	501.633	501.633	501.633	501.633	501.36	0	501.633	501.633	501.632	501.633	501.633	501.633	501.633	501.632	501.633	501.633	501.633	501.633	501.633	501.633	501.633	501.633	501.633	501.633	501.633	501.633	501.633	501.633	501.633	501.633	501.633	501.633
R0065	667.758	667.758	667.758	667.758	667.758	667.757	667.758	667.758	667.758	667.758	667.758	667.758	667.758	667.758	667.758	667.758	667.758	667.758	667.758	667.758	667.758	667.575	667.758	667.758	667.758	667.757	667.758	667.758	667.758	667.758	667.757	667.758	667.758	667.758	667.758	667.758	667.758	667.758	667.758	667.758	667.758	667.758	667.758	667.758	667.758	667.758	667.758	667.758	667.758
R0071	751.624	751.624	751.624	751.624	751.624	751.623	751.624	751.624	751.624	751.624	751.624	751.624	751.624	751.624	751.624	751.624	751.624	751.624	751.624	751.624	751.624	751.35	499.987	751.624	751.624	751.623	751.624	751.624	751.624	751.624	751.623	751.624	751.624	751.624	751.624	751.624	751.624	751.624	751.624	751.624	751.624	751.624	751.624	751.624	751.624	751.624	751.624	751.624	751.624
R0072	751.63	751.63	751.63	751.63	751.63	751.629	751.63	751.63	751.63	751.63	751.63	751.63	751.63	751.63	751.63	751.63	751.63	751.63	751.63	751.63	751.63	751.357	499.994	751.63	751.63	751.629	751.63	751.63	751.63	751.63	751.629	751.63	751.63	751.63	751.63	751.63	751.63	751.63	751.63	751.63	751.63	751.63	751.63	751.63	751.63	751.63	751.63	751.63	751.63
R0075	36.8564	36.8564	36.8564	36.8564	36.8564	36.8564	36.8564	36.8564	36.8564	36.8564	36.8564	36.8564	36.8564	36.8564	36.8564	36.8564	36.8564	36.8564	36.8564	36.8564	36.8564	36.8564	36.8564	36.8564	36.8564	36.8564	36.8564	36.8564	36.8564	36.8564	36.8564	36.8564	36.8564	36.8564	36.8564	36.8564	36.8564	36.8564	36.8564	36.8564	36.8564	36.8564	36.8564	36.8564	36.8564	36.8564	36.8564	36.8564	36.8564
R0076	0.000244802	0.000244802	0.000244802	0.000244802	0.000244802	0.000244802	0.000244802	0.000244802	0.000244802	0.000244802	0.000244802	0.000244802	0.000244802	0.000244802	0.000244802	0.000244802	0	0.000244802	0.000244802	0.000244802	0	0.000244802	0.000244802	0.000244802	0.000244802	0.000244802	0.000244802	0.000244802	0.000244802	0	0.000244802	0.000244802	0.000244802	0.000244802	0.000244802	0.000244802	0.000244802	0.000244802	0.000244802	0.000244802	0.000244802	0.000244802	0.000244802	0.000244802	0.000244802	0.000244802	0.000244802	0.000244802	0.000244802
R0078	0.000244802	0.000244802	0.000244802	0.000244802	0.000244802	0.000244802	0.000244802	0.000244802	0.000244802	0.000244802	0.000244802	0.000244802	0.000244802	0.000244802	0.000244802	0.000244802	0	0.000244802	0.000244802	0.000244802	0	0.000244802	0.000244802	0.000244802	0.000244802	0.000244802	0.000244802	0.000244802	0.000244802	0	0.000244802	0.000244802	0.000244802	0.000244802	0.000244802	0.000244802	0.000244802	0.000244802	0.000244802	0.000244802	0.000244802	0.000244802	0.000244802	0.000244802	0.000244802	0.000244802	0.000244802	0.000244802	0.000244802
R0079	182.597	182.597	182.597	182.597	182.597	182.596	182.597	182.597	182.597	182.597	182.597	182.597	182.597	182.597	182.597	182.597	182.597	182.597	182.597	182.597	182.597	182.497	182.597	182.597	182.597	182.596	182.597	182.597	182.597	182.597	182.596	182.597	182.597	182.597	182.597	182.597	182.597	182.597	182.597	182.597	182.597	182.597	182.597	182.597	182.597	182.597	182.597	182.597	182.597
R0080	0.000244802	0.000244802	0.000244802	0.000244802	0.000244802	0.000244802	0.000244802	0.000244802	0.000244802	0.000244802	0.000244802	0.000244802	0.000244802	0.000244802	0.000244802	0.000244802	0	0.000244802	0.000244802	0.000244802	0	0.000244802	0.000244802	0.000244802	0.000244802	0.000244802	0.000244802	0.000244802	0.000244802	0.000104915	0.000244802	0.000244802	0.000244802	0.000244802	0.000244802	0.000244802	0.000244802	0.000244802	0.000244802	0.000244802	0.000244802	0.000244802	0.000244802	0.000244802	0.000244802	0.000244802	0.000244802	0.000244802	0.000244802
R0081	182.597	182.597	182.597	182.597	182.597	182.596	182.597	182.597	182.597	182.597	182.597	182.597	182.597	182.597	182.597	182.597	182.597	182.597	182.597	182.597	182.597	182.497	182.597	182.597	182.597	182.596	182.597	182.597	182.597	182.597	182.596	182.597	182.597	182.597	182.597	182.597	182.597	182.597	182.597	182.597	182.597	182.597	182.597	182.597	182.597	182.597	182.597	182.597	182.597
R0082	182.411	182.411	182.411	182.411	182.411	182.411	182.411	182.411	182.411	182.411	182.411	182.411	182.411	182.411	182.411	182.411	182.411	182.411	182.411	182.411	182.411	182.312	182.411	182.411	182.411	182.411	182.411	182.411	182.411	182.411	182.411	182.411	182.411	182.411	182.411	182.411	182.411	182.411	182.411	182.411	182.411	182.411	182.411	182.411	182.411	182.411	182.411	182.411	182.411
R0083	270.522	270.522	270.522	270.522	270.522	270.521	270.522	270.522	270.522	270.522	270.522	270.522	270.522	270.522	270.522	270.522	270.522	270.522	270.522	270.522	270.522	270.385	270.522	270.522	270.522	270.521	270.522	270.522	270.522	270.522	270.521	270.522	270.522	270.522	270.522	270.522	270.522	270.522	270.522	270.522	270.522	270.522	270.522	270.522	270.522	270.522	270.522	270.522	270.522
R0084	0.00110161	0.00110161	0.00110161	0.00110161	0.00110161	0.00110161	0.00110161	0.00110161	0.00110161	0.00110161	0.00110161	0.00110161	0.00110161	0.00110161	0.00110161	0.00110161	0.00110161	0.00110161	0.00110161	0.00110161	0.00110161	0.00110161	0.00110161	0.00110161	0.00110161	0.00110161	0.00110161	0.00110161	0.00110161	0.00110161	0.00110161	0.00110161	0.00110161	0.00110161	0.00110161	0.00110161	0.00110161	0.00110161	0.00110161	0.00110161	0.00110161	0.00110161	0.00110161	0.00110161	0.00110161	0.00110161	0.00110161	0.00110161	0.00110161
R0085	270.527	270.527	270.527	270.527	270.527	270.526	270.527	270.527	270.527	270.527	270.527	270.527	270.527	270.527	270.527	270.527	270.527	270.527	270.527	270.527	270.527	270.39	270.527	270.527	270.527	270.526	270.527	270.527	270.527	270.527	270.526	270.527	270.527	270.527	270.527	270.527	270.527	270.527	270.527	270.527	270.527	270.527	270.527	270.527	270.527	270.527	270.527	270.527	270.527
R0086	270.523	270.523	270.523	270.523	270.523	270.522	270.523	270.523	270.523	270.523	270.523	270.523	270.523	270.523	270.523	270.523	270.523	270.523	270.523	270.523	270.523	270.386	270.523	270.523	270.523	270.522	270.523	270.523	270.523	270.523	270.522	270.523	270.523	270.523	270.523	270.523	270.523	270.523	270.523	270.523	270.523	270.523	270.523	270.523	270.523	270.523	270.523	270.523	270.523
R0087	0	0	0	0	0	0	-4.79835e-27	0	0	0	0	0	0	0	0	0	0	0	0	0	0	0	0	0	0	0	0	0	0	0	0	0	0	0	0	0	0	0	0	0	0	0	0	0	0	0	0	0	0
R0088	270.527	270.527	270.527	270.527	270.527	270.526	270.527	270.527	270.527	270.527	270.527	270.527	270.527	270.527	270.527	270.527	270.527	270.527	270.527	270.527	270.527	270.39	270.527	270.527	270.527	270.526	270.527	270.527	270.527	270.527	270.526	270.527	270.527	270.527	270.527	270.527	270.527	270.527	270.527	270.527	270.527	270.527	270.527	270.527	270.527	270.527	270.527	270.527	270.527
R0089	0.0102017	0.0102017	0.0102017	0.0102017	0.0102017	0.0102017	0.0102017	0.0102017	0.0102017	0.0102017	0.0102017	0.0102017	0.0102017	0.0102017	0.0102017	0.0102017	0.0102017	0.0102017	0.0102017	0.0102017	0.0102017	0.0102017	0.0102017	0.0102017	0.0102017	0.0102017	0.0102017	0.0102017	0.0102017	0.0102017	0.0102017	0.0102017	0.0102017	0.0102017	0.0102017	0.0102017	0.0102017	0.0102017	0.0102017	0.0102017	0.0102017	0.0102017	0.0102017	0.0102017	0.0102017	0.0102017	0.0102017	0.0102017	0.0102017
R0090	270.527	270.527	270.527	270.527	270.527	270.526	270.527	270.527	270.527	270.527	270.527	270.527	270.527	270.527	270.527	270.527	270.527	270.527	270.527	270.527	270.527	270.39	270.527	270.527	270.527	270.526	270.527	270.527	270.527	270.527	270.526	270.527	270.527	270.527	270.527	270.527	270.527	270.527	270.527	270.527	270.527	270.527	270.527	270.527	270.527	270.527	270.527	270.527	270.527
R0091	0.000244802	0.000244802	0.000244802	0.000244802	0.000244802	0.000244802	0.000244802	0.000244802	0.000244802	0.000244802	0.000244802	0.000244802	0.000244802	0.000244802	0.000244802	0.000244802	0	0.000244802	0.000244802	0.000244802	0	0.000244802	0.000244802	0.000244802	0.000244802	0.000244802	0.000244802	0.000244802	0.000244802	0.000104915	0.000244802	0.000244802	0.000244802	0.000244802	0.000244802	0.000244802	0.000244802	0.000244802	0.000244802	0.000244802	0.000244802	0.000244802	0.000244802	0.000244802	0.000244802	0.000244802	0.000244802	0.000244802	0.000244802
R0092	0.0102017	0.0102017	0.0102017	0.0102017	0.0102017	0.0102017	0.0102017	0.0102017	0.0102017	0.0102017	0.0102017	0.0102017	0.0102017	0.0102017	0.0102017	0.0102017	0.0102017	0.0102017	0.0102017	0.0102017	0.0102017	0.0102017	0.0102017	0.0102017	0.0102017	0.0102017	0.0102017	0.0102017	0.0102017	0.0102017	0.0102017	0.0102017	0.0102017	0.0102017	0.0102017	0.0102017	0.0102017	0.0102017	0.0102017	0.0102017	0.0102017	0.0102017	0.0102017	0.0102017	0.0102017	0.0102017	0.0102017	0.0102017	0.0102017
R0093	0.000244802	0.000244802	0.000244802	0.000244802	0.000244802	0.000244802	0.000244802	0.000244802	0.000244802	0.000244802	0.000244802	0.000244802	0.000244802	0.000244802	0.000244802	0.000244802	0	0.000244802	0.000244802	0.000244802	0	0.000244802	0.000244802	0.000244802	0.000244802	0.000244802	0.000244802	0.000244802	0.000244802	0.000104915	0.000244802	0.000244802	0.000244802	0.000244802	0.000244802	0.000244802	0.000244802	0.000244802	0.000244802	0.000244802	0.000244802	0.000244802	0.000244802	0.000244802	0.000244802	0.000244802	0.000244802	0.000244802	0.000244802
R0094	0.0102017	0.0102017	0.0102017	0.0102017	0.0102017	0.0102017	0.0102017	0.0102017	0.0102017	0.0102017	0.0102017	0.0102017	0.0102017	0.0102017	0.0102017	0.0102017	0.0102017	0.0102017	0.0102017	0.0102017	0.0102017	0.0102017	0.0102017	0.0102017	0.0102017	0.0102017	0.0102017	0.0102017	0.0102017	0.0102017	0.0102017	0.0102017	0.0102017	0.0102017	0.0102017	0.0102017	0.0102017	0.0102017	0.0102017	0.0102017	0.0102017	0.0102017	0.0102017	0.0102017	0.0102017	0.0102017	0.0102017	0.0102017	0.0102017
R0097	0.00110161	0.00110161	0.00110161	0.00110161	0.00110161	0.00110161	0.00110161	0.00110161	0.00110161	0.00110161	0.00110161	0.00110161	0.00110161	0.00110161	0.00110161	0.00110161	0.00110161	0.00110161	0.00110161	0.00110161	0.00110161	0.00110161	0.00110161	0.00110161	0.00110161	0.00110161	0.00110161	0.00110161	0.00110161	0.00110161	0.00110161	0.00110161	0.00110161	0.00110161	0.00110161	0.00110161	0.00110161	0.00110161	0.00110161	0.00110161	0.00110161	0.00110161	0.00110161	0.00110161	0.00110161	0.00110161	0.00110161	0.00110161	0.00110161
R0098	270.527	270.527	270.527	270.527	270.527	270.526	270.527	270.527	270.527	270.527	270.527	270.527	270.527	270.527	270.527	270.527	270.527	270.527	270.527	270.527	270.527	270.39	270.527	270.527	270.527	270.526	270.527	270.527	270.527	270.527	270.526	270.527	270.527	270.527	270.527	270.527	270.527	270.527	270.527	270.527	270.527	270.527	270.527	270.527	270.527	270.527	270.527	270.527	270.527
R0099	0.0102017	0.0102017	0.0102017	0.0102017	0.0102017	0.0102017	0.0102017	0.0102017	0.0102017	0.0102017	0.0102017	0.0102017	0.0102017	0.0102017	0.0102017	0.0102017	0.0102017	0.0102017	0.0102017	0.0102017	0.0102017	0.0102017	0.0102017	0.0102017	0.0102017	0.0102017	0.0102017	0.0102017	0.0102017	0.0102017	0.0102017	0.0102017	0.0102017	0.0102017	0.0102017	0.0102017	0.0102017	0.0102017	0.0102017	0.0102017	0.0102017	0.0102017	0.0102017	0.0102017	0.0102017	0.0102017	0.0102017	0.0102017	0.0102017
R0100	1000	1000	1000	1000	1000	1000	1000	1000	1000	1000	1000	1000	1000	1000	1000	1000	1000	1000	1000	1000	1000	1000	1000	1000	1000	1000	1000	1000	1000	1000	1000	1000	1000	1000	1000	1000	1000	1000	1000	1000	1000	1000	1000	1000	1000	1000	1000	1000	1000
R0101	0	0	0	0	0	0	0	0	0	0	0	0	0	0	0	0	0	0	0	0	0	0	0	0	0	0	0	0	0	0	0	0	0	0	0	0	0	0	0	0	0	0	0	0	0	0	0	0	0
R0102	0.000244802	0.000244802	0.000244802	0.000244802	0.000244802	0.000244802	0.000244802	0.000244802	0.000244802	0.000244802	0.000244802	0.000244802	0.000244802	0.000244802	0.000244802	0.000244802	0	0.000244802	0.000244802	0.000244802	0	0.000244802	0.000244802	0.000244802	0.000244802	0.000244802	0.000244802	0.000244802	0.000244802	0.000104915	0.000244802	0.000244802	0.000244802	0.000244802	0.000244802	0.000244802	0.000244802	0.000244802	0.000244802	0.000244802	0.000244802	0.000244802	0.000244802	0.000244802	0.000244802	0.000244802	0.000244802	0.000244802	0.000244802
R0103	270.523	270.523	270.523	270.523	270.523	270.522	270.523	270.523	270.523	270.523	270.523	270.523	270.523	270.523	270.523	270.523	270.523	270.523	270.523	270.523	270.523	270.386	270.523	270.523	270.523	270.522	270.523	270.523	270.523	270.523	270.522	270.523	270.523	270.523	270.523	270.523	270.523	270.523	270.523	270.523	270.523	270.523	270.523	270.523	270.523	270.523	270.523	270.523	270.523
R0105	0.000244802	0.000244802	0.000244802	0.000244802	0.000244802	0.000244802	0.000244802	0.000244802	0.000244802	0.000244802	0.000244802	0.000244802	0.000244802	0.000244802	0.000244802	0.000244802	0	0.000244802	0.000244802	0.000244802	0	0.000244802	0.000244802	0.000244802	0.000244802	0.000244802	0.000244802	0.000244802	0.000244802	0.000104915	0.000244802	0.000244802	0.000244802	0.000244802	0.000244802	0.000244802	0.000244802	0.000244802	0.000244802	0.000244802	0.000244802	0.000244802	0.000244802	0.000244802	0.000244802	0.000244802	0.000244802	0.000244802	0.000244802
R0106	0.000244802	0.000244802	0.000244802	0.000244802	0.000244802	0.000244802	0.000244802	0.000244802	0.000244802	0.000244802	0.000244802	0.000244802	0.000244802	0.000244802	0.000244802	0.000244802	0	0.000244802	0.000244802	0.000244802	0	0.000244802	0.000244802	0.000244802	0.000244802	0.000244802	0.000244802	0.000244802	0.000244802	0.000104915	0.000244802	0.000244802	0.000244802	0.000244802	0.000244802	0.000244802	0.000244802	0.000244802	0.000244802	0.000244802	0.000244802	0.000244802	0.000244802	0.000244802	0.000244802	0.000244802	0.000244802	0.000244802	0.000244802
R0107	0.000244802	0.000244802	0.000244802	0.000244802	0.000244802	0.000244802	0.000244802	0.000244802	0.000244802	0.000244802	0.000244802	0.000244802	0.000244802	0.000244802	0.000244802	0.000244802	0	0.000244802	0.000244802	0.000244802	0	0.000244802	0.000244802	0.000244802	0.000244802	0.000244802	0.000244802	0.000244802	0.000244802	0.000104915	0.000244802	0.000244802	0.000244802	0.000244802	0.000244802	0.000244802	0.000244802	0.000244802	0.000244802	0.000244802	0.000244802	0.000244802	0.000244802	0.000244802	0.000244802	0.000244802	0.000244802	0.000244802	0.000244802
R0108	0.00110161	0.00110161	0.00110161	0.00110161	0.00110161	0.00110161	0.00110161	0.00110161	0.00110161	0.00110161	0.00110161	0.00110161	0.00110161	0.00110161	0.00110161	0.00110161	0.00110161	0.00110161	0.00110161	0.00110161	0.00110161	0.00110161	0.00110161	0.00110161	0.00110161	0.00110161	0.00110161	0.00110161	0.00110161	0.00110161	0.00110161	0.00110161	0.00110161	0.00110161	0.00110161	0.00110161	0.00110161	0.00110161	0.00110161	0.00110161	0.00110161	0.00110161	0.00110161	0.00110161	0.00110161	0.00110161	0.00110161	0.00110161	0.00110161
R0109	0	0	0	0	0	0	0	0	0	0	0	0	0	0	0	0	0	0	0	0	0	0	0	0	0	0	0	0	0	0	0	0	0	0	0	0	0	0	0	0	0	0	0	0	0	0	0	0	0
R0110	0.000244802	0.000244802	0.000244802	0.000244802	0.000244802	0.000244802	0.000244802	0.000244802	0.000244802	0.000244802	0.000244802	0.000244802	0.000244802	0.000244802	0.000244802	0.000244802	0	0.000244802	0.000244802	0.000244802	0	0.000244802	0.000244802	0.000244802	0.000244802	0.000244802	0.000244802	0.000244802	0.000244802	0.000104915	0.000244802	0.000244802	0.000244802	0.000244802	0.000244802	0.000244802	0.000244802	0.000244802	0.000244802	0.000244802	0.000244802	0.000244802	0.000244802	0.000244802	0.000244802	0.000244802	0.000244802	0.000244802	0.000244802
R0116	0.000314746	0.000314746	0.000314746	0.000314746	0.000314746	0.000314746	0.000314746	0.000314746	0.000314746	0.000314746	0.000314746	0.000314746	0.000314746	0.000314746	0.000314746	0.000314746	0.000314746	0.000314746	0.000314746	0.000314746	0.000314746	0.000314746	0.000314746	0.000314746	0.000314746	0.000314746	0.000314746	0.000314746	0.000314746	0.000314746	0.000314746	0.000314746	0.000314746	0.000314746	0.000314746	0.000314746	0.000314746	0.000314746	0.000314746	0.000314746	0.000314746	0.000314746	0.000314746	0.000314746	0.000314746	0.000314746	0.000314746	0.000314746	0.000314746
R0118	0.000314746	0.000314746	0.000314746	0.000314746	0.000314746	0.000314746	0.000314746	0.000314746	0.000314746	0.000314746	0.000314746	0.000314746	0.000314746	0.000314746	0.000314746	0.000314746	0.000314746	0.000314746	0.000314746	0.000314746	0.000314746	0.000314746	0.000314746	0.000314746	0.000314746	0.000314746	0.000314746	0.000314746	0.000314746	0.000314746	0.000314746	0.000314746	0.000314746	0.000314746	0.000314746	0.000314746	0.000314746	0.000314746	0.000314746	0.000314746	0.000314746	0.000314746	0.000314746	0.000314746	0.000314746	0.000314746	0.000314746	0.000314746	0.000314746
R0119	0.000314746	0.000314746	0.000314746	0.000314746	0.000314746	0.000314746	0.000314746	0.000314746	0.000314746	0.000314746	0.000314746	0.000314746	0.000314746	0.000314746	0.000314746	0.000314746	0.000314746	0.000314746	0.000314746	0.000314746	0.000314746	0.000314746	0.000314746	0.000314746	0.000314746	0.000314746	0.000314746	0.000314746	0.000314746	0.000314746	0.000314746	0.000314746	0.000314746	0.000314746	0.000314746	0.000314746	0.000314746	0.000314746	0.000314746	0.000314746	0.000314746	0.000314746	0.000314746	0.000314746	0.000314746	0.000314746	0.000314746	0.000314746	0.000314746
R0124	4.75906	4.75906	4.75906	4.75906	4.75906	4.75906	4.75906	4.75906	4.75906	4.75906	4.75906	4.75906	4.75906	4.75906	4.75906	4.75906	4.75906	4.75906	4.75906	4.75906	4.75906	4.75906	4.75906	4.75906	4.75906	4.75906	4.75906	4.75906	4.75906	4.75906	4.75906	4.75906	4.75906	4.75906	4.75906	4.75906	4.75906	4.75906	4.75906	4.75906	4.75906	4.75906	4.75906	4.75906	4.75906	4.75906	4.75906	4.75906	4.75906
R0125	4.75906	4.75906	4.75906	4.75906	4.75906	4.75906	4.75906	4.75906	4.75906	4.75906	4.75906	4.75906	4.75906	4.75906	4.75906	4.75906	4.75906	4.75906	4.75906	4.75906	4.75906	4.75906	4.75906	4.75906	4.75906	4.75906	4.75906	4.75906	4.75906	4.75906	4.75906	4.75906	4.75906	4.75906	4.75906	4.75906	4.75906	4.75906	4.75906	4.75906	4.75906	4.75906	4.75906	4.75906	4.75906	4.75906	4.75906	4.75906	4.75906
R0126	4.76052	4.76052	4.76052	4.76052	4.76052	4.76052	4.76052	4.76052	4.76052	4.76052	4.76052	4.76052	4.76052	4.76052	4.76052	4.76052	4.76052	4.76052	4.76052	4.76052	4.76052	4.76052	4.76052	4.76052	4.76052	4.76052	4.76052	4.76052	4.76052	4.76052	4.76052	4.76052	4.76052	4.76052	4.76052	4.76052	4.76052	4.76052	4.76052	4.76052	4.76052	4.76052	4.76052	4.76052	4.76052	4.76052	4.76052	4.76052	4.76052
R0127	4.76052	4.76052	4.76052	4.76052	4.76052	4.76052	4.76052	4.76052	4.76052	4.76052	4.76052	4.76052	4.76052	4.76052	4.76052	4.76052	4.76052	4.76052	4.76052	4.76052	4.76052	4.76052	4.76052	4.76052	4.76052	4.76052	4.76052	4.76052	4.76052	4.76052	4.76052	4.76052	4.76052	4.76052	4.76052	4.76052	4.76052	4.76052	4.76052	4.76052	4.76052	4.76052	4.76052	4.76052	4.76052	4.76052	4.76052	4.76052	4.76052
R0128	4.66536	4.66536	4.66536	4.66536	4.66536	4.66536	4.66536	4.66536	4.66536	4.66536	4.66536	4.66536	4.66536	4.66536	4.66536	4.66536	4.66536	4.66536	4.66536	4.66536	4.66536	4.66536	4.66536	4.66536	4.66536	4.66536	4.66536	4.66536	4.66536	4.66536	4.66536	4.66536	4.66536	4.66536	4.66536	4.66536	4.66536	4.66536	4.66536	4.66536	4.66536	4.66536	4.66536	4.66536	4.66536	4.66536	4.66536	4.66536	4.66536
R0129	4.66536	4.66536	4.66536	4.66536	4.66536	4.66536	4.66536	4.66536	4.66536	4.66536	4.66536	4.66536	4.66536	4.66536	4.66536	4.66536	4.66536	4.66536	4.66536	4.66536	4.66536	4.66536	4.66536	4.66536	4.66536	4.66536	4.66536	4.66536	4.66536	4.66536	4.66536	4.66536	4.66536	4.66536	4.66536	4.66536	4.66536	4.66536	4.66536	4.66536	4.66536	4.66536	4.66536	4.66536	4.66536	4.66536	4.66536	4.66536	4.66536
R0130	4.37986	4.37986	4.37986	4.37986	4.37986	4.37986	4.37986	4.37986	4.37986	4.37986	4.37986	4.37986	4.37986	4.37986	4.37986	4.37986	4.37986	4.37986	4.37986	4.37986	4.37986	4.37986	4.37986	4.37986	4.37986	4.37986	4.37986	4.37986	4.37986	4.37986	4.37986	4.37986	4.37986	4.37986	4.37986	4.37986	4.37986	4.37986	4.37986	4.37986	4.37986	4.37986	4.37986	4.37986	4.37986	4.37986	4.37986	4.37986	4.37986
R0131	4.37986	4.37986	4.37986	4.37986	4.37986	4.37986	4.37986	4.37986	4.37986	4.37986	4.37986	4.37986	4.37986	4.37986	4.37986	4.37986	4.37986	4.37986	4.37986	4.37986	4.37986	4.37986	4.37986	4.37986	4.37986	4.37986	4.37986	4.37986	4.37986	4.37986	4.37986	4.37986	4.37986	4.37986	4.37986	4.37986	4.37986	4.37986	4.37986	4.37986	4.37986	4.37986	4.37986	4.37986	4.37986	4.37986	4.37986	4.37986	4.37986
R0132	3.90403	3.90403	3.90403	3.90403	3.90403	3.90403	3.90403	3.90403	3.90403	3.90403	3.90403	3.90403	3.90403	3.90403	3.90403	3.90403	3.90403	3.90403	3.90403	3.90403	3.90403	3.90403	3.90403	3.90403	3.90403	3.90403	3.90403	3.90403	3.90403	3.90403	3.90403	3.90403	3.90403	3.90403	3.90403	3.90403	3.90403	3.90403	3.90403	3.90403	3.90403	3.90403	3.90403	3.90403	3.90403	3.90403	3.90403	3.90403	3.90403
R0133	3.90403	3.90403	3.90403	3.90403	3.90403	3.90403	3.90403	3.90403	3.90403	3.90403	3.90403	3.90403	3.90403	3.90403	3.90403	3.90403	3.90403	3.90403	3.90403	3.90403	3.90403	3.90403	3.90403	3.90403	3.90403	3.90403	3.90403	3.90403	3.90403	3.90403	3.90403	3.90403	3.90403	3.90403	3.90403	3.90403	3.90403	3.90403	3.90403	3.90403	3.90403	3.90403	3.90403	3.90403	3.90403	3.90403	3.90403	3.90403	3.90403
R0134	1.81037	1.81037	1.81037	1.81037	1.81037	1.81037	1.81037	1.81037	1.81037	1.81037	1.81037	1.81037	1.81037	1.81037	1.81037	1.81037	1.81037	1.81037	1.81037	1.81037	1.81037	1.81037	1.81037	1.81037	1.81037	1.81037	1.81037	1.81037	1.81037	1.81037	1.81037	1.81037	1.81037	1.81037	1.81037	1.81037	1.81037	1.81037	1.81037	1.81037	1.81037	1.81037	1.81037	1.81037	1.81037	1.81037	1.81037	1.81037	1.81037
R0135	1.81037	1.81037	1.81037	1.81037	1.81037	1.81037	1.81037	1.81037	1.81037	1.81037	1.81037	1.81037	1.81037	1.81037	1.81037	1.81037	1.81037	1.81037	1.81037	1.81037	1.81037	1.81037	1.81037	1.81037	1.81037	1.81037	1.81037	1.81037	1.81037	1.81037	1.81037	1.81037	1.81037	1.81037	1.81037	1.81037	1.81037	1.81037	1.81037	1.81037	1.81037	1.81037	1.81037	1.81037	1.81037	1.81037	1.81037	1.81037	1.81037
R0136	0.000734407	0.000734407	0.000734407	0.000734407	0.000734407	0.000734407	0.000734407	0.000734407	0.000734407	0.000734407	0.000734407	0.000734407	0.000734407	0.000734407	0.000734407	0.000734407	0.000734407	0.000734407	0.000734407	0.000734407	0.000734407	0.000734407	0.000734407	0.000734407	0.000734407	0.000734407	0.000734407	0.000734407	0.000734407	0.000734407	0.000734407	0.000734407	0.000734407	0.000734407	0.000734407	0.000734407	0.000734407	0.000734407	0.000734407	0.000734407	0.000734407	0.000734407	0.000734407	0.000734407	0.000734407	0.000734407	0.000734407	0.000734407	0.000734407
R0137	0.00220322	0.00220322	0.00220322	0.00220322	0.00220322	0.00220322	0.00220322	0.00220322	0.00220322	0.00220322	0.00220322	0.00220322	0.00220322	0.00220322	0.00220322	0.00220322	0.00220322	0.00220322	0.00220322	0.00220322	0.00220322	0.00220322	0.00220322	0.00220322	0.00220322	0.00220322	0.00220322	0.00220322	0.00220322	0.00220322	0.00220322	0.00220322	0.00220322	0.00220322	0.00220322	0.00220322	0.00220322	0.00220322	0.00220322	0.00220322	0.00220322	0.00220322	0.00220322	0.00220322	0.00220322	0.00220322	0.00220322	0.00220322	0.00220322
R0138	0.000314746	0.000314746	0.000314746	0.000314746	0.000314746	0.000314746	0.000314746	0.000314746	0.000314746	0.000314746	0.000314746	0.000314746	0.000314746	0.000314746	0.000314746	0.000314746	0.000314746	0.000314746	0.000314746	0.000314746	0.000314746	0.000314746	0.000314746	0.000314746	0.000314746	0.000314746	0.000314746	0.000314746	0.000314746	0.000314746	0.000314746	0.000314746	0.000314746	0.000314746	0.000314746	0.000314746	0.000314746	0.000314746	0.000314746	0.000314746	0.000314746	0.000314746	0.000314746	0.000314746	0.000314746	0.000314746	0.000314746	0.000314746	0.000314746
R0139	0.80919	0.80919	0.80919	0.80919	0.80919	0.80919	0.80919	0.80919	0.80919	0.80919	0.80919	0.80919	0.80919	0.80919	0.80919	0.80919	0.80919	0.80919	0.80919	0.80919	0.80919	0.80919	0.80919	0.80919	0.80919	0.80919	0.80919	0.80919	0.80919	0.80919	0.80919	0.80919	0.80919	0.80919	0.80919	0.80919	0.80919	0.80919	0.80919	0.80919	0.80919	0.80919	0.80919	0.80919	0.80919	0.80919	0.80919	0.80919	0.80919
R0140	1.57049	1.57049	1.57049	1.57049	1.57049	1.57049	1.57049	1.57049	1.57049	1.57049	1.57049	1.57049	1.57049	1.57049	1.57049	1.57049	1.57049	1.57049	1.57049	1.57049	1.57049	1.57049	1.57049	1.57049	1.57049	1.57049	1.57049	1.57049	1.57049	1.57049	1.57049	1.57049	1.57049	1.57049	1.57049	1.57049	1.57049	1.57049	1.57049	1.57049	1.57049	1.57049	1.57049	1.57049	1.57049	1.57049	1.57049	1.57049	1.57049
R0141	10.4934	10.4934	10.4934	10.4934	10.4934	10.4934	10.4934	10.4934	10.4934	10.4934	10.4934	10.4934	10.4934	10.4934	10.4934	10.4934	10.4934	10.4934	10.4934	10.4934	10.4934	10.4903	10.4934	10.4934	10.4934	10.4934	10.4934	10.4934	10.4934	10.4934	10.4934	10.4934	10.4934	10.4934	10.4934	10.4934	10.4934	10.4934	10.4934	10.4934	10.4934	10.4934	10.4934	10.4934	10.4934	10.4934	10.4934	10.4934	10.4934
R0142	21.864	21.864	21.864	21.864	21.864	21.864	21.864	21.864	21.864	21.864	21.864	21.864	21.864	21.864	21.864	21.864	21.864	21.864	21.864	21.864	21.864	21.8546	21.864	21.864	21.864	21.864	21.864	21.864	21.864	21.864	21.864	21.864	21.864	21.864	21.864	21.864	21.864	21.864	21.864	21.864	21.864	21.864	21.864	21.864	21.864	21.864	21.864	21.864	21.864
R0143	33.0442	33.0442	33.0442	33.0442	33.0442	33.0442	33.0442	33.0442	33.0442	33.0442	33.0442	33.0442	33.0442	33.0442	33.0442	33.0442	33.0442	33.0442	33.0442	33.0442	33.0442	33.0286	33.0442	33.0442	33.0442	33.0442	33.0442	33.0442	33.0442	33.0442	33.0442	33.0442	33.0442	33.0442	33.0442	33.0442	33.0442	33.0442	33.0442	33.0442	33.0442	33.0442	33.0442	33.0442	33.0442	33.0442	33.0442	33.0442	33.0442
R0144	0.000314746	0.000314746	0.000314746	0.000314746	0.000314746	0.000314746	0.000314746	0.000314746	0.000314746	0.000314746	0.000314746	0.000314746	0.000314746	0.000314746	0.000314746	0.000314746	0.000314746	0.000314746	0.000314746	0.000314746	0.000314746	0.000314746	0.000314746	0.000314746	0.000314746	0.000314746	0.000314746	0.000314746	0.000314746	0.000314746	0.000314746	0.000314746	0.000314746	0.000314746	0.000314746	0.000314746	0.000314746	0.000314746	0.000314746	0.000314746	0.000314746	0.000314746	0.000314746	0.000314746	0.000314746	0.000314746	0.000314746	0.000314746	0.000314746
R0145	81.2978	81.2978	81.2978	81.2978	81.2978	81.2978	81.2978	81.2978	81.2978	81.2978	81.2978	81.2978	81.2978	81.2978	81.2978	81.2978	81.2978	81.2978	81.2978	81.2978	81.2978	81.2556	81.2978	81.2978	81.2978	81.2978	81.2978	81.2978	81.2978	81.2978	81.2978	81.2978	81.2978	81.2978	81.2978	81.2978	81.2978	81.2978	81.2978	81.2978	81.2978	81.2978	81.2978	81.2978	81.2978	81.2978	81.2978	81.2978	81.2978
R0146	49.5387	49.5387	49.5387	49.5387	49.5387	49.5386	49.5387	49.5387	49.5387	49.5387	49.5387	49.5387	49.5387	49.5387	49.5387	49.5387	49.5387	49.5387	49.5387	49.5387	49.5387	49.5121	49.5387	49.5387	49.5387	49.5386	49.5387	49.5387	49.5387	49.5387	49.5386	49.5387	49.5387	49.5387	49.5387	49.5387	49.5387	49.5387	49.5387	49.5387	49.5387	49.5387	49.5387	49.5387	49.5387	49.5387	49.5387	49.5387	49.5387
R0147	16.1425	16.1425	16.1425	16.1425	16.1425	16.1425	16.1425	16.1425	16.1425	16.1425	16.1425	16.1425	16.1425	16.1425	16.1425	16.1425	16.1425	16.1425	16.1425	16.1425	16.1425	16.1347	16.1425	16.1425	16.1425	16.1425	16.1425	16.1425	16.1425	16.1425	16.1425	16.1425	16.1425	16.1425	16.1425	16.1425	16.1425	16.1425	16.1425	16.1425	16.1425	16.1425	16.1425	16.1425	16.1425	16.1425	16.1425	16.1425	16.1425
R0148	70.3653	70.3653	70.3653	70.3653	70.3653	70.3651	70.3653	70.3653	70.3653	70.3653	70.3653	70.3653	70.3653	70.3653	70.3653	70.3653	70.3653	70.3653	70.3653	70.3653	70.3653	70.3277	70.3653	70.3653	70.3653	70.3651	70.3653	70.3653	70.3653	70.3653	70.3651	70.3653	70.3653	70.3653	70.3653	70.3653	70.3653	70.3653	70.3653	70.3653	70.3653	70.3653	70.3653	70.3653	70.3653	70.3653	70.3653	70.3653	70.3653
R0149	26.2264	26.2264	26.2264	26.2264	26.2264	26.2264	26.2264	26.2264	26.2264	26.2264	26.2264	26.2264	26.2264	26.2264	26.2264	26.2264	26.2264	26.2264	26.2264	26.2264	26.2264	26.2123	26.2264	26.2264	26.2264	26.2264	26.2264	26.2264	26.2264	26.2264	26.2264	26.2264	26.2264	26.2264	26.2264	26.2264	26.2264	26.2264	26.2264	26.2264	26.2264	26.2264	26.2264	26.2264	26.2264	26.2264	26.2264	26.2264	26.2264
R0150	0.000734407	0.000734407	0.000734407	0.000734407	0.000734407	0.000734407	0.000734407	0.000734407	0.000734407	0.000734407	0.000734407	0.000734407	0.000734407	0.000734407	0.000734407	0.000734407	0.000734407	0.000734407	0.000734407	0.000734407	0.000734407	0.000734407	0.000734407	0.000734407	0.000734407	0.000734407	0.000734407	0.000734407	0.000734407	0.000734407	0.000734407	0.000734407	0.000734407	0.000734407	0.000734407	0.000734407	0.000734407	0.000734407	0.000734407	0.000734407	0.000734407	0.000734407	0.000734407	0.000734407	0.000734407	0.000734407	0.000734407	0.000734407	0.000734407
R0151	0.00220322	0.00220322	0.00220322	0.00220322	0.00220322	0.00220322	0.00220322	0.00220322	0.00220322	0.00220322	0.00220322	0.00220322	0.00220322	0.00220322	0.00220322	0.00220322	0.00220322	0.00220322	0.00220322	0.00220322	0.00220322	0.00220322	0.00220322	0.00220322	0.00220322	0.00220322	0.00220322	0.00220322	0.00220322	0.00220322	0.00220322	0.00220322	0.00220322	0.00220322	0.00220322	0.00220322	0.00220322	0.00220322	0.00220322	0.00220322	0.00220322	0.00220322	0.00220322	0.00220322	0.00220322	0.00220322	0.00220322	0.00220322	0.00220322
R0152	4.75906	4.75906	4.75906	4.75906	4.75906	4.75906	4.75906	4.75906	4.75906	4.75906	4.75906	4.75906	4.75906	4.75906	4.75906	4.75906	4.75906	4.75906	4.75906	4.75906	4.75906	4.75906	4.75906	4.75906	4.75906	4.75906	4.75906	4.75906	4.75906	4.75906	4.75906	4.75906	4.75906	4.75906	4.75906	4.75906	4.75906	4.75906	4.75906	4.75906	4.75906	4.75906	4.75906	4.75906	4.75906	4.75906	4.75906	4.75906	4.75906
R0153	0.000314746	0.000314746	0.000314746	0.000314746	0.000314746	0.000314746	0.000314746	0.000314746	0.000314746	0.000314746	0.000314746	0.000314746	0.000314746	0.000314746	0.000314746	0.000314746	0.000314746	0.000314746	0.000314746	0.000314746	0.000314746	0.000314746	0.000314746	0.000314746	0.000314746	0.000314746	0.000314746	0.000314746	0.000314746	0.000314746	0.000314746	0.000314746	0.000314746	0.000314746	0.000314746	0.000314746	0.000314746	0.000314746	0.000314746	0.000314746	0.000314746	0.000314746	0.000314746	0.000314746	0.000314746	0.000314746	0.000314746	0.000314746	0.000314746
R0154	0.80919	0.80919	0.80919	0.80919	0.80919	0.80919	0.80919	0.80919	0.80919	0.80919	0.80919	0.80919	0.80919	0.80919	0.80919	0.80919	0.80919	0.80919	0.80919	0.80919	0.80919	0.80919	0.80919	0.80919	0.80919	0.80919	0.80919	0.80919	0.80919	0.80919	0.80919	0.80919	0.80919	0.80919	0.80919	0.80919	0.80919	0.80919	0.80919	0.80919	0.80919	0.80919	0.80919	0.80919	0.80919	0.80919	0.80919	0.80919	0.80919
R0155	1.57049	1.57049	1.57049	1.57049	1.57049	1.57049	1.57049	1.57049	1.57049	1.57049	1.57049	1.57049	1.57049	1.57049	1.57049	1.57049	1.57049	1.57049	1.57049	1.57049	1.57049	1.57049	1.57049	1.57049	1.57049	1.57049	1.57049	1.57049	1.57049	1.57049	1.57049	1.57049	1.57049	1.57049	1.57049	1.57049	1.57049	1.57049	1.57049	1.57049	1.57049	1.57049	1.57049	1.57049	1.57049	1.57049	1.57049	1.57049	1.57049
R0156	0.428469	0.428469	0.428469	0.428469	0.428469	0.428469	0.428469	0.428469	0.428469	0.428469	0.428469	0.428469	0.428469	0.428469	0.428469	0.428469	0.428469	0.428469	0.428469	0.428469	0.428469	0.428469	0.428469	0.428469	0.428469	0.428469	0.428469	0.428469	0.428469	0.428469	0.428469	0.428469	0.428469	0.428469	0.428469	0.428469	0.428469	0.428469	0.428469	0.428469	0.428469	0.428469	0.428469	0.428469	0.428469	0.428469	0.428469	0.428469	0.428469
R0160	4.66536	4.66536	4.66536	4.66536	4.66536	4.66536	4.66536	4.66536	4.66536	4.66536	4.66536	4.66536	4.66536	4.66536	4.66536	4.66536	4.66536	4.66536	4.66536	4.66536	4.66536	4.66536	4.66536	4.66536	4.66536	4.66536	4.66536	4.66536	4.66536	4.66536	4.66536	4.66536	4.66536	4.66536	4.66536	4.66536	4.66536	4.66536	4.66536	4.66536	4.66536	4.66536	4.66536	4.66536	4.66536	4.66536	4.66536	4.66536	4.66536
R0161	33.4144	33.4144	33.4144	33.4144	33.4144	33.4144	33.4144	33.4144	33.4144	33.4144	33.4144	33.4144	33.4144	33.4144	33.4144	33.4144	33.4144	33.4144	33.4144	33.4144	33.4144	33.4144	33.4144	33.4144	33.4144	33.4144	33.4144	33.4144	33.4144	33.4144	33.4144	33.4144	33.4144	33.4144	33.4144	33.4144	33.4144	33.4144	33.4144	33.4144	33.4144	33.4144	33.4144	33.4144	33.4144	33.4144	33.4144	33.4144	33.4144
R0162	535.414	535.414	535.414	535.414	535.414	535.413	535.414	535.414	535.414	535.414	535.414	535.414	535.414	535.414	535.414	535.414	535.414	535.414	535.414	535.414	535.414	535.141	535.414	535.414	535.414	535.413	535.414	535.414	535.414	535.414	535.413	535.414	535.414	535.414	535.414	535.414	535.414	535.414	535.414	535.414	535.414	535.414	535.414	535.414	535.414	535.414	535.414	535.414	535.414
R0163	4.66536	4.66536	4.66536	4.66536	4.66536	4.66536	4.66536	4.66536	4.66536	4.66536	4.66536	4.66536	4.66536	4.66536	4.66536	4.66536	4.66536	4.66536	4.66536	4.66536	4.66536	4.66536	4.66536	4.66536	4.66536	4.66536	4.66536	4.66536	4.66536	4.66536	4.66536	4.66536	4.66536	4.66536	4.66536	4.66536	4.66536	4.66536	4.66536	4.66536	4.66536	4.66536	4.66536	4.66536	4.66536	4.66536	4.66536	4.66536	4.66536
R0164	4.66536	4.66536	4.66536	4.66536	4.66536	4.66536	4.66536	4.66536	4.66536	4.66536	4.66536	4.66536	4.66536	4.66536	4.66536	4.66536	4.66536	4.66536	4.66536	4.66536	4.66536	4.66536	4.66536	4.66536	4.66536	4.66536	4.66536	4.66536	4.66536	4.66536	4.66536	4.66536	4.66536	4.66536	4.66536	4.66536	4.66536	4.66536	4.66536	4.66536	4.66536	4.66536	4.66536	4.66536	4.66536	4.66536	4.66536	4.66536	4.66536
R0165	4.66536	4.66536	4.66536	4.66536	4.66536	4.66536	4.66536	4.66536	4.66536	4.66536	4.66536	4.66536	4.66536	4.66536	4.66536	4.66536	4.66536	4.66536	4.66536	4.66536	4.66536	4.66536	4.66536	4.66536	4.66536	4.66536	4.66536	4.66536	4.66536	4.66536	4.66536	4.66536	4.66536	4.66536	4.66536	4.66536	4.66536	4.66536	4.66536	4.66536	4.66536	4.66536	4.66536	4.66536	4.66536	4.66536	4.66536	4.66536	4.66536
R0166	4.37986	4.37986	4.37986	4.37986	4.37986	4.37986	4.37986	4.37986	4.37986	4.37986	4.37986	4.37986	4.37986	4.37986	4.37986	4.37986	4.37986	4.37986	4.37986	4.37986	4.37986	4.37986	4.37986	4.37986	4.37986	4.37986	4.37986	4.37986	4.37986	4.37986	4.37986	4.37986	4.37986	4.37986	4.37986	4.37986	4.37986	4.37986	4.37986	4.37986	4.37986	4.37986	4.37986	4.37986	4.37986	4.37986	4.37986	4.37986	4.37986
R0167	0.000314746	0.000314746	0.000314746	0.000314746	0.000314746	0.000314746	0.000314746	0.000314746	0.000314746	0.000314746	0.000314746	0.000314746	0.000314746	0.000314746	0.000314746	0.000314746	0.000314746	0.000314746	0.000314746	0.000314746	0.000314746	0.000314746	0.000314746	0.000314746	0.000314746	0.000314746	0.000314746	0.000314746	0.000314746	0.000314746	0.000314746	0.000314746	0.000314746	0.000314746	0.000314746	0.000314746	0.000314746	0.000314746	0.000314746	0.000314746	0.000314746	0.000314746	0.000314746	0.000314746	0.000314746	0.000314746	0.000314746	0.000314746	0.000314746
R0168	0.80919	0.80919	0.80919	0.80919	0.80919	0.80919	0.80919	0.80919	0.80919	0.80919	0.80919	0.80919	0.80919	0.80919	0.80919	0.80919	0.80919	0.80919	0.80919	0.80919	0.80919	0.80919	0.80919	0.80919	0.80919	0.80919	0.80919	0.80919	0.80919	0.80919	0.80919	0.80919	0.80919	0.80919	0.80919	0.80919	0.80919	0.80919	0.80919	0.80919	0.80919	0.80919	0.80919	0.80919	0.80919	0.80919	0.80919	0.80919	0.80919
R0169	3.90403	3.90403	3.90403	3.90403	3.90403	3.90403	3.90403	3.90403	3.90403	3.90403	3.90403	3.90403	3.90403	3.90403	3.90403	3.90403	3.90403	3.90403	3.90403	3.90403	3.90403	3.90403	3.90403	3.90403	3.90403	3.90403	3.90403	3.90403	3.90403	3.90403	3.90403	3.90403	3.90403	3.90403	3.90403	3.90403	3.90403	3.90403	3.90403	3.90403	3.90403	3.90403	3.90403	3.90403	3.90403	3.90403	3.90403	3.90403	3.90403
R0170	0.428469	0.428469	0.428469	0.428469	0.428469	0.428469	0.428469	0.428469	0.428469	0.428469	0.428469	0.428469	0.428469	0.428469	0.428469	0.428469	0.428469	0.428469	0.428469	0.428469	0.428469	0.428469	0.428469	0.428469	0.428469	0.428469	0.428469	0.428469	0.428469	0.428469	0.428469	0.428469	0.428469	0.428469	0.428469	0.428469	0.428469	0.428469	0.428469	0.428469	0.428469	0.428469	0.428469	0.428469	0.428469	0.428469	0.428469	0.428469	0.428469
R0171	1.57049	1.57049	1.57049	1.57049	1.57049	1.57049	1.57049	1.57049	1.57049	1.57049	1.57049	1.57049	1.57049	1.57049	1.57049	1.57049	1.57049	1.57049	1.57049	1.57049	1.57049	1.57049	1.57049	1.57049	1.57049	1.57049	1.57049	1.57049	1.57049	1.57049	1.57049	1.57049	1.57049	1.57049	1.57049	1.57049	1.57049	1.57049	1.57049	1.57049	1.57049	1.57049	1.57049	1.57049	1.57049	1.57049	1.57049	1.57049	1.57049
R0172	1.81037	1.81037	1.81037	1.81037	1.81037	1.81037	1.81037	1.81037	1.81037	1.81037	1.81037	1.81037	1.81037	1.81037	1.81037	1.81037	1.81037	1.81037	1.81037	1.81037	1.81037	1.81037	1.81037	1.81037	1.81037	1.81037	1.81037	1.81037	1.81037	1.81037	1.81037	1.81037	1.81037	1.81037	1.81037	1.81037	1.81037	1.81037	1.81037	1.81037	1.81037	1.81037	1.81037	1.81037	1.81037	1.81037	1.81037	1.81037	1.81037
R0173	4.66536	4.66536	4.66536	4.66536	4.66536	4.66536	4.66536	4.66536	4.66536	4.66536	4.66536	4.66536	4.66536	4.66536	4.66536	4.66536	4.66536	4.66536	4.66536	4.66536	4.66536	4.66536	4.66536	4.66536	4.66536	4.66536	4.66536	4.66536	4.66536	4.66536	4.66536	4.66536	4.66536	4.66536	4.66536	4.66536	4.66536	4.66536	4.66536	4.66536	4.66536	4.66536	4.66536	4.66536	4.66536	4.66536	4.66536	4.66536	4.66536
R0174	4.37986	4.37986	4.37986	4.37986	4.37986	4.37986	4.37986	4.37986	4.37986	4.37986	4.37986	4.37986	4.37986	4.37986	4.37986	4.37986	4.37986	4.37986	4.37986	4.37986	4.37986	4.37986	4.37986	4.37986	4.37986	4.37986	4.37986	4.37986	4.37986	4.37986	4.37986	4.37986	4.37986	4.37986	4.37986	4.37986	4.37986	4.37986	4.37986	4.37986	4.37986	4.37986	4.37986	4.37986	4.37986	4.37986	4.37986	4.37986	4.37986
R0175	0.000314746	0.000314746	0.000314746	0.000314746	0.000314746	0.000314746	0.000314746	0.000314746	0.000314746	0.000314746	0.000314746	0.000314746	0.000314746	0.000314746	0.000314746	0.000314746	0.000314746	0.000314746	0.000314746	0.000314746	0.000314746	0.000314746	0.000314746	0.000314746	0.000314746	0.000314746	0.000314746	0.000314746	0.000314746	0.000314746	0.000314746	0.000314746	0.000314746	0.000314746	0.000314746	0.000314746	0.000314746	0.000314746	0.000314746	0.000314746	0.000314746	0.000314746	0.000314746	0.000314746	0.000314746	0.000314746	0.000314746	0.000314746	0.000314746
R0176	3.90403	3.90403	3.90403	3.90403	3.90403	3.90403	3.90403	3.90403	3.90403	3.90403	3.90403	3.90403	3.90403	3.90403	3.90403	3.90403	3.90403	3.90403	3.90403	3.90403	3.90403	3.90403	3.90403	3.90403	3.90403	3.90403	3.90403	3.90403	3.90403	3.90403	3.90403	3.90403	3.90403	3.90403	3.90403	3.90403	3.90403	3.90403	3.90403	3.90403	3.90403	3.90403	3.90403	3.90403	3.90403	3.90403	3.90403	3.90403	3.90403
R0177	0.80919	0.80919	0.80919	0.80919	0.80919	0.80919	0.80919	0.80919	0.80919	0.80919	0.80919	0.80919	0.80919	0.80919	0.80919	0.80919	0.80919	0.80919	0.80919	0.80919	0.80919	0.80919	0.80919	0.80919	0.80919	0.80919	0.80919	0.80919	0.80919	0.80919	0.80919	0.80919	0.80919	0.80919	0.80919	0.80919	0.80919	0.80919	0.80919	0.80919	0.80919	0.80919	0.80919	0.80919	0.80919	0.80919	0.80919	0.80919	0.80919
R0178	1.81037	1.81037	1.81037	1.81037	1.81037	1.81037	1.81037	1.81037	1.81037	1.81037	1.81037	1.81037	1.81037	1.81037	1.81037	1.81037	1.81037	1.81037	1.81037	1.81037	1.81037	1.81037	1.81037	1.81037	1.81037	1.81037	1.81037	1.81037	1.81037	1.81037	1.81037	1.81037	1.81037	1.81037	1.81037	1.81037	1.81037	1.81037	1.81037	1.81037	1.81037	1.81037	1.81037	1.81037	1.81037	1.81037	1.81037	1.81037	1.81037
R0179	1.57049	1.57049	1.57049	1.57049	1.57049	1.57049	1.57049	1.57049	1.57049	1.57049	1.57049	1.57049	1.57049	1.57049	1.57049	1.57049	1.57049	1.57049	1.57049	1.57049	1.57049	1.57049	1.57049	1.57049	1.57049	1.57049	1.57049	1.57049	1.57049	1.57049	1.57049	1.57049	1.57049	1.57049	1.57049	1.57049	1.57049	1.57049	1.57049	1.57049	1.57049	1.57049	1.57049	1.57049	1.57049	1.57049	1.57049	1.57049	1.57049
R0180	0.428469	0.428469	0.428469	0.428469	0.428469	0.428469	0.428469	0.428469	0.428469	0.428469	0.428469	0.428469	0.428469	0.428469	0.428469	0.428469	0.428469	0.428469	0.428469	0.428469	0.428469	0.428469	0.428469	0.428469	0.428469	0.428469	0.428469	0.428469	0.428469	0.428469	0.428469	0.428469	0.428469	0.428469	0.428469	0.428469	0.428469	0.428469	0.428469	0.428469	0.428469	0.428469	0.428469	0.428469	0.428469	0.428469	0.428469	0.428469	0.428469
R0181	575.427	575.427	575.427	575.427	575.427	575.426	575.427	575.427	575.427	575.427	575.427	575.427	575.427	575.427	575.427	575.427	575.427	575.427	575.427	575.427	575.427	575.154	575.427	575.427	575.427	575.426	575.427	575.427	575.427	575.427	575.426	575.427	575.427	575.427	575.427	575.427	575.427	575.427	575.427	575.427	575.427	575.427	575.427	575.427	575.427	575.427	575.427	575.427	575.427
R0182	0	0	0	0	0	0	0	0	0	0	0	0	0	0	0	0	0	0	0	0	0	0	0	0	0	0	0	0	0	0	0	0	0	0	0	0	0	0	0	0	0	0	0	0	0	0	0	0	0
R0183	0	0	0	0	0	0	0	0	0	0	0	0	0	0	0	0	0	0	0	0	0	0	0	0	0	0	0	0	0	0	0	0	0	0	0	0	0	0	0	0	0	0	0	0	0	0	0	0	0
R0184	0	0	0	0	0	0	0	0	0	0	0	0	0	0	0	0	0	0	0	0	0	0	0	0	0	0	0	0	0	0	0	0	0	0	0	0	0	0	0	0	0	0	0	0	0	0	0	0	0
R0191	0.00220322	0.00220322	0.00220322	0.00220322	0.00220322	0.00220322	0.00220322	0.00220322	0.00220322	0.00220322	0.00220322	0.00220322	0.00220322	0.00220322	0.00220322	0.00220322	0.00220322	0.00220322	0.00220322	0.00220322	0.00220322	0.00220322	0.00220322	0.00220322	0.00220322	0.00220322	0.00220322	0.00220322	0.00220322	0.00220322	0.00220322	0.00220322	0.00220322	0.00220322	0.00220322	0.00220322	0.00220322	0.00220322	0.00220322	0.00220322	0.00220322	0.00220322	0.00220322	0.00220322	0.00220322	0.00220322	0.00220322	0.00220322	0.00220322
R0192	0.00220322	0.00220322	0.00220322	0.00220322	0.00220322	0.00220322	0.00220322	0.00220322	0.00220322	0.00220322	0.00220322	0.00220322	0.00220322	0.00220322	0.00220322	0.00220322	0.00220322	0.00220322	0.00220322	0.00220322	0.00220322	0.00220322	0.00220322	0.00220322	0.00220322	0.00220322	0.00220322	0.00220322	0.00220322	0.00220322	0.00220322	0.00220322	0.00220322	0.00220322	0.00220322	0.00220322	0.00220322	0.00220322	0.00220322	0.00220322	0.00220322	0.00220322	0.00220322	0.00220322	0.00220322	0.00220322	0.00220322	0.00220322	0.00220322
R0193	0.00220322	0.00220322	0.00220322	0.00220322	0.00220322	0.00220322	0.00220322	0.00220322	0.00220322	0.00220322	0.00220322	0.00220322	0.00220322	0.00220322	0.00220322	0.00220322	0.00220322	0.00220322	0.00220322	0.00220322	0.00220322	0.00220322	0.00220322	0.00220322	0.00220322	0.00220322	0.00220322	0.00220322	0.00220322	0.00220322	0.00220322	0.00220322	0.00220322	0.00220322	0.00220322	0.00220322	0.00220322	0.00220322	0.00220322	0.00220322	0.00220322	0.00220322	0.00220322	0.00220322	0.00220322	0.00220322	0.00220322	0.00220322	0.00220322
R0194	0.00220322	0.00220322	0.00220322	0.00220322	0.00220322	0.00220322	0.00220322	0.00220322	0.00220322	0.00220322	0.00220322	0.00220322	0.00220322	0.00220322	0.00220322	0.00220322	0.00220322	0.00220322	0.00220322	0.00220322	0.00220322	0.00220322	0.00220322	0.00220322	0.00220322	0.00220322	0.00220322	0.00220322	0.00220322	0.00220322	0.00220322	0.00220322	0.00220322	0.00220322	0.00220322	0.00220322	0.00220322	0.00220322	0.00220322	0.00220322	0.00220322	0.00220322	0.00220322	0.00220322	0.00220322	0.00220322	0.00220322	0.00220322	0.00220322
R0195	0.000734407	0.000734407	0.000734407	0.000734407	0.000734407	0.000734407	0.000734407	0.000734407	0.000734407	0.000734407	0.000734407	0.000734407	0.000734407	0.000734407	0.000734407	0.000734407	0.000734407	0.000734407	0.000734407	0.000734407	0.000734407	0.000734407	0.000734407	0.000734407	0.000734407	0.000734407	0.000734407	0.000734407	0.000734407	0.000734407	0.000734407	0.000734407	0.000734407	0.000734407	0.000734407	0.000734407	0.000734407	0.000734407	0.000734407	0.000734407	0.000734407	0.000734407	0.000734407	0.000734407	0.000734407	0.000734407	0.000734407	0.000734407	0.000734407
R0196	0.00220322	0.00220322	0.00220322	0.00220322	0.00220322	0.00220322	0.00220322	0.00220322	0.00220322	0.00220322	0.00220322	0.00220322	0.00220322	0.00220322	0.00220322	0.00220322	0.00220322	0.00220322	0.00220322	0.00220322	0.00220322	0.00220322	0.00220322	0.00220322	0.00220322	0.00220322	0.00220322	0.00220322	0.00220322	0.00220322	0.00220322	0.00220322	0.00220322	0.00220322	0.00220322	0.00220322	0.00220322	0.00220322	0.00220322	0.00220322	0.00220322	0.00220322	0.00220322	0.00220322	0.00220322	0.00220322	0.00220322	0.00220322	0.00220322
R0197	0	0	0	0	0	0	0	0	0	0	0	0	0	0	0	0	0	0	0	0	0	0	0	0	0	0	0	0	0	0	0	0	0	0	0	0	0	0	0	0	0	1.35541e-26	0	0	0	0	0	0	1.5017e-31
R0198	0	0	0	0	0	0	0	0	0	0	0	0	0	0	0	0	0	0	0	0	0	0	0	0	0	0	0	0	0	0	0	0	0	0	0	0	0	0	0	0	0	1.35503e-26	0	0	0	0	0	0	1.55954e-31
R0199	0.00220322	0.00220322	0.00220322	0.00220322	0.00220322	0.00220322	0.00220322	0.00220322	0.00220322	0.00220322	0.00220322	0.00220322	0.00220322	0.00220322	0.00220322	0.00220322	0.00220322	0.00220322	0.00220322	0.00220322	0.00220322	0.00220322	0.00220322	0.00220322	0.00220322	0.00220322	0.00220322	0.00220322	0.00220322	0.00220322	0.00220322	0.00220322	0.00220322	0.00220322	0.00220322	0.00220322	0.00220322	0.00220322	0.00220322	0.00220322	0.00220322	0.00220322	0.00220322	0.00220322	0.00220322	0.00220322	0.00220322	0.00220322	0.00220322
R0200	0.00220322	0.00220322	0.00220322	0.00220322	0.00220322	0.00220322	0.00220322	0.00220322	0.00220322	0.00220322	0.00220322	0.00220322	0.00220322	0.00220322	0.00220322	0.00220322	0.00220322	0.00220322	0.00220322	0.00220322	0.00220322	0.00220322	0.00220322	0.00220322	0.00220322	0.00220322	0.00220322	0.00220322	0.00220322	0.00220322	0.00220322	0.00220322	0.00220322	0.00220322	0.00220322	0.00220322	0.00220322	0.00220322	0.00220322	0.00220322	0.00220322	0.00220322	0.00220322	0.00220322	0.00220322	0.00220322	0.00220322	0.00220322	0.00220322
R0201	0	0	0	0	0	0	0	0	0	0	0	0	0	0	0	0	0	0	0	0	0	0	0	0	0	0	0	0	0	0	0	0	0	0	0	0	0	0	0	0	0	0	0	0	0	0	0	1.17686e-31	0
R0202	0	0	0	0	0	0	0	0	0	0	0	0	0	0	0	0	0	0	0	0	0	0	0	0	0	0	0	0	0	0	0	0	0	0	0	0	0	0	0	0	0	0	0	0	0	0	0	0	0
R0203	0.00220322	0.00220322	0.00220322	0.00220322	0.00220322	0.00220322	0.00220322	0.00220322	0.00220322	0.00220322	0.00220322	0.00220322	0.00220322	0.00220322	0.00220322	0.00220322	0.00220322	0.00220322	0.00220322	0.00220322	0.00220322	0.00220322	0.00220322	0.00220322	0.00220322	0.00220322	0.00220322	0.00220322	0.00220322	0.00220322	0.00220322	0.00220322	0.00220322	0.00220322	0.00220322	0.00220322	0.00220322	0.00220322	0.00220322	0.00220322	0.00220322	0.00220322	0.00220322	0.00220322	0.00220322	0.00220322	0.00220322	0.00220322	0.00220322
R0204	0.00220322	0.00220322	0.00220322	0.00220322	0.00220322	0.00220322	0.00220322	0.00220322	0.00220322	0.00220322	0.00220322	0.00220322	0.00220322	0.00220322	0.00220322	0.00220322	0.00220322	0.00220322	0.00220322	0.00220322	0.00220322	0.00220322	0.00220322	0.00220322	0.00220322	0.00220322	0.00220322	0.00220322	0.00220322	0.00220322	0.00220322	0.00220322	0.00220322	0.00220322	0.00220322	0.00220322	0.00220322	0.00220322	0.00220322	0.00220322	0.00220322	0.00220322	0.00220322	0.00220322	0.00220322	0.00220322	0.00220322	0.00220322	0.00220322
R0205	0	0	0	0	0	0	-4.05135e-24	0	0	0	-7.41593e-30	0	0	0	0	0	1.44611e-28	0	0	0	1.44611e-28	0	0	0	0	0	0	0	0	0	0	0	0	0	0	0	0	0	0	0	0	0	0	0	0	0	0	0	0
R0206	0	0	0	0	0	0	-4.05319e-24	0	0	0	-1.55988e-29	0	0	0	0	0	1.48189e-28	0	0	0	1.48189e-28	0	0	0	0	0	0	0	0	0	0	0	0	0	0	0	0	0	0	0	0	0	0	0	0	0	0	0	0
R0207	0.00220322	0.00220322	0.00220322	0.00220322	0.00220322	0.00220322	0.00220322	0.00220322	0.00220322	0.00220322	0.00220322	0.00220322	0.00220322	0.00220322	0.00220322	0.00220322	0.00220322	0.00220322	0.00220322	0.00220322	0.00220322	0.00220322	0.00220322	0.00220322	0.00220322	0.00220322	0.00220322	0.00220322	0.00220322	0.00220322	0.00220322	0.00220322	0.00220322	0.00220322	0.00220322	0.00220322	0.00220322	0.00220322	0.00220322	0.00220322	0.00220322	0.00220322	0.00220322	0.00220322	0.00220322	0.00220322	0.00220322	0.00220322	0.00220322
R0208	0.00220322	0.00220322	0.00220322	0.00220322	0.00220322	0.00220322	0.00220322	0.00220322	0.00220322	0.00220322	0.00220322	0.00220322	0.00220322	0.00220322	0.00220322	0.00220322	0.00220322	0.00220322	0.00220322	0.00220322	0.00220322	0.00220322	0.00220322	0.00220322	0.00220322	0.00220322	0.00220322	0.00220322	0.00220322	0.00220322	0.00220322	0.00220322	0.00220322	0.00220322	0.00220322	0.00220322	0.00220322	0.00220322	0.00220322	0.00220322	0.00220322	0.00220322	0.00220322	0.00220322	0.00220322	0.00220322	0.00220322	0.00220322	0.00220322
R0209	0	0	0	0	0	-8.2766e-30	-4.05305e-24	0	0	0	-2.29992e-28	0	0	0	0	0	9.20771e-29	0	0	0	9.20771e-29	0	0	0	0	0	4.31073e-32	0	0	0	0	0	0	0	0	0	0	0	0	0	0	0	0	0	0	0	0	0	0
R0210	0	0	0	0	0	-8.38541e-30	-4.0529e-24	0	0	0	-2.3e-28	0	0	0	0	0	9.2e-29	0	0	0	9.2e-29	0	0	0	0	0	4.49219e-32	0	0	0	0	0	0	0	0	0	0	0	0	0	0	0	0	0	0	0	0	0	0
R0211	0.00220322	0.00220322	0.00220322	0.00220322	0.00220322	0.00220322	0.00220322	0.00220322	0.00220322	0.00220322	0.00220322	0.00220322	0.00220322	0.00220322	0.00220322	0.00220322	0.00220322	0.00220322	0.00220322	0.00220322	0.00220322	0.00220322	0.00220322	0.00220322	0.00220322	0.00220322	0.00220322	0.00220322	0.00220322	0.00220322	0.00220322	0.00220322	0.00220322	0.00220322	0.00220322	0.00220322	0.00220322	0.00220322	0.00220322	0.00220322	0.00220322	0.00220322	0.00220322	0.00220322	0.00220322	0.00220322	0.00220322	0.00220322	0.00220322
R0212	0.00220322	0.00220322	0.00220322	0.00220322	0.00220322	0.00220322	0.00220322	0.00220322	0.00220322	0.00220322	0.00220322	0.00220322	0.00220322	0.00220322	0.00220322	0.00220322	0.00220322	0.00220322	0.00220322	0.00220322	0.00220322	0.00220322	0.00220322	0.00220322	0.00220322	0.00220322	0.00220322	0.00220322	0.00220322	0.00220322	0.00220322	0.00220322	0.00220322	0.00220322	0.00220322	0.00220322	0.00220322	0.00220322	0.00220322	0.00220322	0.00220322	0.00220322	0.00220322	0.00220322	0.00220322	0.00220322	0.00220322	0.00220322	0.00220322
R0213	0	0	0	0	0	-6.2148e-31	-3.9674e-24	0	0	0	0	0	0	0	0	0	0	0	0	0	0	0	0	0	-1.58195e-29	0	2.82491e-32	0	0	0	0	0	0	0	0	0	0	0	0	0	0	0	0	0	0	0	0	0	0
R0214	0	0	0	0	0	-6.31013e-31	-3.96999e-24	0	0	0	0	0	0	0	0	0	0	0	0	0	0	0	0	0	-1.61539e-29	0	3.15507e-32	0	0	0	0	0	0	0	0	0	0	0	0	0	0	0	0	0	0	0	0	0	0
R0215	0.00220322	0.00220322	0.00220322	0.00220322	0.00220322	0.00220322	0.00220322	0.00220322	0.00220322	0.00220322	0.00220322	0.00220322	0.00220322	0.00220322	0.00220322	0.00220322	0.00220322	0.00220322	0.00220322	0.00220322	0.00220322	0.00220322	0.00220322	0.00220322	0.00220322	0.00220322	0.00220322	0.00220322	0.00220322	0.00220322	0.00220322	0.00220322	0.00220322	0.00220322	0.00220322	0.00220322	0.00220322	0.00220322	0.00220322	0.00220322	0.00220322	0.00220322	0.00220322	0.00220322	0.00220322	0.00220322	0.00220322	0.00220322	0.00220322
R0216	0.000734407	0.000734407	0.000734407	0.000734407	0.000734407	0.000734407	0.000734407	0.000734407	0.000734407	0.000734407	0.000734407	0.000734407	0.000734407	0.000734407	0.000734407	0.000734407	0.000734407	0.000734407	0.000734407	0.000734407	0.000734407	0.000734407	0.000734407	0.000734407	0.000734407	0.000734407	0.000734407	0.000734407	0.000734407	0.000734407	0.000734407	0.000734407	0.000734407	0.000734407	0.000734407	0.000734407	0.000734407	0.000734407	0.000734407	0.000734407	0.000734407	0.000734407	0.000734407	0.000734407	0.000734407	0.000734407	0.000734407	0.000734407	0.000734407
R0217	0.000275403	0.000275403	0.000275403	0.000275403	0.000275403	0.000275403	0.000275403	0.000275403	0.000275403	0.000275403	0.000275403	0.000275403	0.000275403	0.000275403	0.000275403	0.000275403	0.000275403	0.000275403	0.000275403	0.000275403	0.000275403	0.000275402	0.000275403	0.000275403	0.000275403	0.000275403	0.000275403	0.000275403	0.000275403	0.000275403	0.000275403	0.000275403	0.000275403	0.000275403	0.000275403	0.000275403	0.000275403	0.000275403	0.000275403	0.000275403	0.000275403	0.000275403	0.000275403	0.000275403	0.000275403	0.000275403	0.000275403	0.000275403	0.000275403
R0218	0.000314746	0.000314746	0.000314746	0.000314746	0.000314746	0.000314746	0.000314746	0.000314746	0.000314746	0.000314746	0.000314746	0.000314746	0.000314746	0.000314746	0.000314746	0.000314746	0.000314746	0.000314746	0.000314746	0.000314746	0.000314746	0.000314746	0.000314746	0.000314746	0.000314746	0.000314746	0.000314746	0.000314746	0.000314746	0.000314746	0.000314746	0.000314746	0.000314746	0.000314746	0.000314746	0.000314746	0.000314746	0.000314746	0.000314746	0.000314746	0.000314746	0.000314746	0.000314746	0.000314746	0.000314746	0.000314746	0.000314746	0.000314746	0.000314746
R0219	0.000244802	0.000244802	0.000244802	0.000244802	0.000244802	0.000244802	0.000244802	0.000244802	0.000244802	0.000244802	0.000244802	0.000244802	0.000244802	0.000244802	0.000244802	0.000244802	0.000244802	0.000244802	0.000244802	0.000244802	0.000244802	0.000244802	0.000244802	0.000244802	0.000244802	0.000244802	0.000244802	0.000244802	0.000244802	0.000244802	0.000244802	0.000244802	0.000244802	0.000244802	0.000244802	0.000244802	0.000244802	0.000244802	0.000244802	0.000244802	0.000244802	0.000244802	0.000244802	0.000244802	0.000244802	0.000244802	0.000244802	0.000244802	0.000244802
R0220	0.000275403	0.000275403	0.000275403	0.000275403	0.000275403	0.000275402	0.000275403	0.000275403	0.000275403	0.000275403	0.000275403	0.000275403	0.000275403	0.000275403	0.000275403	0.000275403	0.000275402	0.000275403	0.000275403	0.000275403	0.000275402	0.000275403	0.000275403	0.000275402	0.000275403	0.000275403	0.000275402	0.000275403	0.000275403	0.000275403	0.000275403	0.000275403	0.000275403	0.000275403	0.000275403	0.000275403	0.000275403	0.000275403	0.000275403	0.000275403	0.000275403	0.000275403	0.000275403	0.000275403	0.000275403	0.000275403	0.000275403	0.000275403	0.000275403
R0221	0.000220322	0.000220322	0.000220322	0.000220322	0.000220322	0.000220322	0.000220322	0.000220322	0.000220322	0.000220322	0.000220322	0.000220322	0.000220322	0.000220322	0.000220322	0.000220322	0.000220322	0.000220322	0.000220322	0.000220322	0.000220322	0.000220322	0.000220322	0.000220322	0.000220322	0.000220322	0.000220322	0.000220322	0.000220322	0.000220322	0.000220322	0.000220322	0.000220322	0.000220322	0.000220322	0.000220322	0.000220322	0.000220322	0.000220322	0.000220322	0.000220322	0.000220322	0.000220322	0.000220322	0.000220322	0.000220322	0.000220322	0.000220322	0.000220322
R0222	0.000244802	0.000244802	0.000244802	0.000244802	0.000244802	0.000244802	0.000244802	0.000244802	0.000244802	0.000244802	0.000244802	0.000244802	0.000244802	0.000244802	0.000244802	0.000244802	0.000244802	0.000244802	0.000244802	0.000244802	0.000244802	0.000244802	0.000244802	0.000244802	0.000244802	0.000244802	0.000244802	0.000244802	0.000244802	0.000244802	0.000244802	0.000244802	0.000244802	0.000244802	0.000244802	0.000244802	0.000244802	0.000244802	0.000244802	0.000244802	0.000244802	0.000244802	0.000244802	0.000244802	0.000244802	0.000244802	0.000244802	0.000244802	0.000244802
R0223	0.000183602	0.000183602	0.000183602	0.000183602	0.000183602	0.000183602	0.000183602	0.000183602	0.000183602	0.000183602	0.000183602	0.000183602	0.000183602	0.000183602	0.000183602	0.000183602	0.000183602	0.000183602	0.000183602	0.000183602	0.000183602	0.000183602	0.000183602	0.000183602	0.000183602	0.000183602	0.000183602	0.000183602	0.000183602	0.000183602	0.000183602	0.000183602	0.000183602	0.000183602	0.000183602	0.000183602	0.000183602	0.000183602	0.000183602	0.000183602	0.000183602	0.000183602	0.000183602	0.000183602	0.000183602	0.000183602	0.000183602	0.000183602	0.000183602
R0224	0.000200293	0.000200293	0.000200293	0.000200293	0.000200293	0.000200293	0.000200293	0.000200293	0.000200293	0.000200293	0.000200293	0.000200293	0.000200293	0.000200293	0.000200293	0.000200293	0.000200293	0.000200293	0.000200293	0.000200293	0.000200293	0.000200293	0.000200293	0.000200293	0.000200293	0.000200293	0.000200293	0.000200293	0.000200293	0.000200293	0.000200293	0.000200293	0.000200293	0.000200293	0.000200293	0.000200293	0.000200293	0.000200293	0.000200293	0.000200293	0.000200293	0.000200293	0.000200293	0.000200293	0.000200293	0.000200293	0.000200293	0.000200293	0.000200293
R0225	0.000220322	0.000220322	0.000220322	0.000220322	0.000220322	0.000220322	0.000220322	0.000220322	0.000220322	0.000220322	0.000220322	0.000220322	0.000220322	0.000220322	0.000220322	0.000220322	0.000220322	0.000220322	0.000220322	0.000220322	0.000220322	0.000220322	0.000220322	0.000220322	0.000220322	0.000220322	0.000220322	0.000220322	0.000220322	0.000220322	0.000220322	0.000220322	0.000220322	0.000220322	0.000220322	0.000220322	0.000220322	0.000220322	0.000220322	0.000220322	0.000220322	0.000220322	0.000220322	0.000220322	0.000220322	0.000220322	0.000220322	0.000220322	0.000220322
R0226	0	0	0	0	0	0	0	0	0	0	0	0	0	0	0	0	0	0	0	0	0	0	0	0	0	0	0	0	0	0	0	0	0	0	0	0	0	0	0	0	0	0	0	0	0	0	0	0	0
R0227	0	0	0	0	0	0	0	0	0	0	0	0	0	0	0	0	0	0	0	0	0	0	0	0	0	0	0	0	0	0	0	0	0	0	0	0	0	0	0	0	0	0	0	0	0	0	0	0	0
R0228	0	0	0	0	0	0	0	0	0	0	0	0	0	0	0	0	0	0	0	0	0	0	0	0	0	0	0	0	0	0	0	0	0	0	0	0	0	0	0	0	0	0	0	0	0	0	0	0	0
R0229	0	0	0	0	0	0	0	0	0	0	0	0	0	0	0	0	0	0	0	0	0	0	0	0	0	0	0	0	0	0	0	0	0	0	0	0	0	0	0	0	0	0	0	0	0	0	0	0	0
R0230	0	0	0	0	0	0	0	0	0	0	0	0	0	0	0	0	0	0	0	0	0	0	0	0	0	0	0	0	0	0	0	0	0	0	0	0	0	0	0	0	0	0	0	0	0	0	0	0	0
R0231	0	0	0	0	0	0	-2.14294e-16	0	0	0	0	0	0	0	0	0	0	0	0	0	0	0	0	0	0	0	0	0	0	0	0	0	0	0	0	0	0	0	0	0	0	0	0	0	0	0	0	0	0
R0232	0	0	0	0	0	0	0	0	0	0	0	0	0	0	0	0	0	0	0	0	0	0	0	0	0	0	0	0	0	0	0	0	0	0	0	0	0	0	0	0	0	0	0	0	0	0	0	0	0
R0233	0	0	0	0	0	0	0	0	0	0	0	0	0	0	0	0	0	0	0	0	0	0	0	0	0	0	0	0	0	0	0	0	0	0	0	0	0	0	0	0	0	0	0	0	0	0	0	0	0
R0234	0	0	0	0	0	0	0	0	0	0	0	0	0	0	0	0	0	0	0	0	0	0	0	0	0	0	0	0	0	0	0	0	0	0	0	0	0	0	0	0	0	0	0	0	0	0	0	0	0
R0235	0	0	0	0	0	0	0	0	0	0	0	0	0	0	0	0	0	0	0	0	0	0	0	0	0	0	0	0	0	0	0	0	0	0	0	0	0	0	0	0	0	0	0	0	0	0	0	0	0
R0236	0	0	0	0	0	0	0	0	0	0	0	0	0	0	0	0	0	0	0	0	0	0	0	0	0	0	0	0	0	0	0	0	0	0	0	0	0	0	0	0	0	0	0	0	0	0	0	0	0
R0237	0	0	0	0	0	0	0	0	0	0	0	0	0	0	0	0	0	0	0	0	0	0	0	0	0	0	0	0	0	0	0	0	0	0	0	0	0	0	0	0	0	0	0	0	0	0	0	0	0
R0238	0	0	0	0	0	-1.99653e-32	-2.12614e-16	0	0	0	0	0	0	4.98973e-31	0	0	0	0	0	0	0	0	0	0	2.45828e-29	0	0	0	0	0	0	0	0	4.98973e-31	0	0	0	0	0	0	0	0	0	0	0	0	4.98973e-31	0	0
R0239	0	0	0	0	0	0	0	0	0	0	0	0	0	0	0	0	0	0	0	0	0	0	0	0	0	0	0	0	0	0	0	0	0	0	0	0	0	0	0	0	0	0	0	0	0	0	0	0	0
R0240	0	0	0	0	0	0	0	0	0	0	0	0	0	0	0	0	0	0	0	0	0	0	0	0	0	0	0	0	0	0	0	0	0	0	0	0	0	0	0	0	0	0	0	0	0	0	0	0	0
R0241	0	0	0	0	0	0	0	0	0	0	0	0	0	0	0	0	0	0	0	0	0	0	0	0	0	0	0	0	0	0	0	0	0	0	0	0	0	0	0	0	0	0	0	0	0	0	0	0	0
R0242	0	0	0	0	0	0	0	0	0	0	0	0	0	0	0	0	0	0	0	0	0	0	0	0	0	0	0	0	0	0	0	0	0	0	0	0	0	0	0	0	0	0	0	0	0	0	0	0	0
R0243	0	0	0	0	0	0	0	0	0	0	0	0	0	0	0	0	0	0	0	0	0	0	0	0	0	0	0	0	0	0	0	0	0	0	0	0	0	0	0	0	0	0	0	0	0	0	0	0	0
R0244	0	0	0	0	0	0	0	0	0	0	0	0	0	0	0	0	0	0	0	0	0	0	0	0	0	0	0	0	0	0	0	0	0	0	0	0	0	0	0	0	0	0	0	0	0	0	0	0	0
R0245	1000	1000	1000	1000	1000	1000	1000	1000	1000	1000	1000	1000	1000	1000	1000	1000	1000	1000	1000	1000	1000	1000	1000	1000	1000	1000	1000	1000	1000	1000	1000	1000	1000	1000	1000	1000	1000	1000	1000	1000	1000	1000	1000	1000	1000	1000	1000	1000	1000
R0246	0	0	0	0	0	0	0	0	0	0	0	0	0	0	0	0	0	0	0	0	0	0	0	0	2.08616e-27	0	0	0	0	0	0	0	0	0	0	0	0	0	0	0	0	0	0	0	0	0	0	0	0
R0247	-0.00107116	-0.00107116	-0.00107116	-0.00107116	-0.00107116	-0.00107116	-0.00107116	-0.00107116	-0.00107116	-0.00107116	-0.00107116	-0.00107116	-0.00107116	-0.00107116	-0.00107116	-0.00107116	-0.00107116	-0.00107116	-0.00107116	-0.00107116	-0.00107116	-0.00107116	-0.00107116	-0.00107116	-0.00107116	-0.00107116	-0.00107116	-0.00107116	-0.00107116	-0.00107116	-0.00107116	-0.00107116	-0.00107116	-0.00107116	-0.00107116	-0.00107116	-0.00107116	-0.00107116	-0.00107116	-0.00107116	-0.00107116	-0.00107116	-0.00107116	-0.00107116	-0.00107116	-0.00107116	-0.00107116	-0.00107116	-0.00107116
R0248	1.09291e-13	1.09291e-13	1.09291e-13	1.09291e-13	0	-5.89098e-14	0	1.09291e-13	1.09291e-13	1.09291e-13	-7.23019e-14	1.09291e-13	0	-1.85938e-13	1.09291e-13	1.09291e-13	-5.96784e-14	1.09291e-13	-5.77399e-14	1.09291e-13	-5.96784e-14	-2.0768e-14	-1.21279e-13	-1.03502e-13	4.40829e-15	-3.69314e-14	-6.75052e-14	1.15968e-13	1.09291e-13	4.79455e-14	-3.69314e-14	1.09291e-13	1.09291e-13	-1.85938e-13	1.09291e-13	1.09291e-13	1.09291e-13	1.09291e-13	-3.43711e-14	1.09291e-13	1.09291e-13	-2.1711e-14	-1.94377e-13	1.09291e-13	1.09291e-13	1.09291e-13	-1.85938e-13	1.50829e-17	-1.09398e-13
R0249	0	0	0	0	0	0	0	0	0	0	0	0	0	0	0	0	0	0	0	0	0	0	0	0	0	0	0	0	0	0	0	0	0	0	0	0	0	0	0	0	0	0	0	0	0	0	0	0	0
R0250	0.000157373	0.000157373	0.000157373	0.000157373	0.000157373	0.000157373	0	0.000157373	0.000157373	0.000157373	0.000157373	0.000157373	0.000157373	0.000157373	0.000157373	0.000157373	0.000157373	0.000157373	0.000157373	0.000157373	0.000157373	0.000157373	0.000157373	0.000157373	0.000157373	0.000157373	0.000157373	0.000157373	0.000157373	0.000157373	0.000157373	0.000157373	0.000157373	0.000157373	0.000157373	0.000157373	0.000157373	0.000157373	0.000157373	0.000157373	0.000157373	0.000157373	0.000157373	0.000157373	0.000157373	0.000157373	0.000157373	0.000157373	0.000157373
R0251	0	0	0	0	0	0	0	0	0	0	0	0	0	0	0	0	0	0	0	0	0	0	0	0	0	0	0	0	0	0	0	0	0	0	0	0	0	0	0	0	0	0	0	0	0	0	0	0	0
R0252	1.09291e-13	1.09291e-13	1.09291e-13	1.09291e-13	0	-5.89098e-14	0	1.09291e-13	1.09291e-13	1.09291e-13	-7.23019e-14	1.09291e-13	0	-1.85938e-13	1.09291e-13	1.09291e-13	-5.96784e-14	1.09291e-13	-5.77399e-14	1.09291e-13	-5.96784e-14	-2.0768e-14	-1.21279e-13	-1.03502e-13	4.40829e-15	-3.69314e-14	-6.75052e-14	1.15968e-13	1.09291e-13	4.79455e-14	-3.69314e-14	1.09291e-13	1.09291e-13	-1.85938e-13	1.09291e-13	1.09291e-13	1.09291e-13	1.09291e-13	-3.43711e-14	1.09291e-13	1.09291e-13	-2.1711e-14	-1.94377e-13	1.09291e-13	1.09291e-13	1.09291e-13	-1.85938e-13	1.50829e-17	-1.09398e-13
R0257	1.09291e-13	1.09291e-13	1.09291e-13	1.09291e-13	0	-5.89098e-14	0	1.09291e-13	1.09291e-13	1.09291e-13	-7.23019e-14	1.09291e-13	0	-1.85938e-13	1.09291e-13	1.09291e-13	-5.96784e-14	1.09291e-13	-5.77399e-14	1.09291e-13	-5.96784e-14	-2.0768e-14	-1.21279e-13	-1.03502e-13	4.40829e-15	-3.69314e-14	-6.75052e-14	1.15968e-13	1.09291e-13	4.79455e-14	-3.69314e-14	1.09291e-13	1.09291e-13	-1.85938e-13	1.09291e-13	1.09291e-13	1.09291e-13	1.09291e-13	-3.43711e-14	1.09291e-13	1.09291e-13	-2.43545e-15	-1.94377e-13	1.09291e-13	1.09291e-13	1.09291e-13	-1.85938e-13	1.50829e-17	-1.09398e-13
R0258	0	0	0	0	0	0	0	0	0	0	0	0	0	0	0	0	0	0	0	0	0	0	0	0	0	0	0	0	0	0	0	0	0	0	0	0	0	0	0	0	0	0	0	0	0	0	0	0	0
R0259	1.09291e-13	1.09291e-13	1.09291e-13	1.09291e-13	0	-5.89098e-14	0	1.09291e-13	1.09291e-13	1.09291e-13	-7.23019e-14	1.09291e-13	0	-1.85938e-13	1.09291e-13	1.09291e-13	-5.96784e-14	1.09291e-13	-5.77399e-14	1.09291e-13	-5.96784e-14	-2.0768e-14	-1.21279e-13	-1.03502e-13	4.40829e-15	-3.69314e-14	-6.75052e-14	1.15968e-13	1.09291e-13	4.79455e-14	-3.69314e-14	1.09291e-13	1.09291e-13	-1.85938e-13	1.09291e-13	1.09291e-13	1.09291e-13	1.09291e-13	-3.43711e-14	1.09291e-13	1.09291e-13	-2.1711e-14	-1.94377e-13	1.09291e-13	1.09291e-13	1.09291e-13	-1.85938e-13	1.50829e-17	-1.09398e-13
R0260	0	0	0	0	0	0	0	0	0	0	0	0	0	0	0	0	0	0	0	0	0	0	0	0	0	0	0	0	0	0	0	0	0	0	0	0	0	0	0	0	0	0	0	0	0	0	0	0	0
R0261	0.00309059	0.00309059	0.00309059	0.00309059	0.00309059	0.00309059	0.00309059	0.00309059	0.00309059	0.00309059	0.00309059	0.00309059	0.00309059	0.00309059	0.00309059	0.00309059	0.00309059	0.00309059	0.00309059	0.00309059	0.00309059	0.00309059	0.00309059	0.00309059	0.00309059	0.00309059	0.00309059	0.00309059	0.00309059	0.00309059	0.00309059	0.00309059	0.00309059	0.00309059	0.00309059	0.00309059	0.00309059	0.00309059	0.00309059	0.00309059	0.00309059	0.00309059	0.00309059	0.00309059	0.00309059	0.00309059	0.00309059	0.00309059	0.00309059
R0262	0	0	0	0	0	0	0	0	0	0	0	0	0	0	0	0	0	0	0	0	0	0	0	0	0	0	0	0	0	0	0	0	0	0	0	0	0	0	0	0	0	0	0	0	0	0	0	0	0
R0263	0.00309059	0.00309059	0.00309059	0.00309059	0.00309059	0.00309059	0.00309059	0.00309059	0.00309059	0.00309059	0.00309059	0.00309059	0.00309059	0.00309059	0.00309059	0.00309059	0.00309059	0.00309059	0.00309059	0.00309059	0.00309059	0.00309059	0.00309059	0.00309059	0.00309059	0.00309059	0.00309059	0.00309059	0.00309059	0.00309059	0.00309059	0.00309059	0.00309059	0.00309059	0.00309059	0.00309059	0.00309059	0.00309059	0.00309059	0.00309059	0.00309059	0.00309059	0.00309059	0.00309059	0.00309059	0.00309059	0.00309059	0.00309059	0.00309059
R0264	-0.00309056	-0.00309056	-0.00309056	-0.00309056	-0.00309056	-0.00309056	-0.00309056	-0.00309056	-0.00309056	-0.00309056	-0.00309056	-0.00309056	-0.00309056	-0.00309056	-0.00309056	-0.00309056	-0.00309056	-0.00309056	-0.00309056	-0.00309056	-0.00309056	-0.00309056	-0.00309056	-0.00309056	-0.00309056	-0.00309056	-0.00309056	-0.00309056	-0.00309056	-0.00309056	-0.00309056	-0.00309056	-0.00309056	-0.00309056	-0.00309056	-0.00309056	-0.00309056	-0.00309056	-0.00309056	-0.00309056	-0.00309056	-0.00309056	-0.00309056	-0.00309056	-0.00309056	-0.00309056	-0.00309056	-0.00309056	-0.00309056
R0265	0	0	0	0	0	0	0	0	0	0	0	0	0	0	0	0	0	0	0	0	0	0	0	0	0	0	0	0	0	0	0	0	0	0	0	0	0	0	0	0	0	0	0	0	0	0	0	0	0
R0266	501.63	501.63	501.63	501.63	501.63	501.629	501.63	501.63	501.63	501.63	501.63	501.63	501.63	501.63	501.63	501.63	501.63	501.63	501.63	501.63	501.63	501.357	501.63	501.63	501.63	501.629	501.63	501.63	501.63	501.63	501.629	501.63	501.63	501.63	501.63	501.63	501.63	501.63	501.63	501.63	501.63	501.63	501.63	501.63	501.63	501.63	501.63	501.63	501.63
R0267	501.63	501.63	501.63	501.63	501.63	501.629	501.63	501.63	501.63	501.63	501.63	501.63	501.63	501.63	501.63	501.63	501.63	501.63	501.63	501.63	501.63	501.357	501.63	501.63	501.63	501.629	501.63	501.63	501.63	501.63	501.629	501.63	501.63	501.63	501.63	501.63	501.63	501.63	501.63	501.63	501.63	501.63	501.63	501.63	501.63	501.63	501.63	501.63	501.63
R0268	0	0	0	0	0	0	0	0	0	0	0	0	0	0	0	0	0	0	0	0	0	0	0	0	0	0	0	0	0	0	0	0	0	0	0	0	0	0	0	0	0	0	0	0	0	0	0	0	0
R0269	270.523	270.523	270.523	270.523	270.523	270.522	270.523	270.523	270.523	270.523	270.523	270.523	270.523	270.523	270.523	270.523	270.523	270.523	270.523	270.523	270.523	270.386	270.523	270.523	270.523	270.522	270.523	270.523	270.523	270.523	270.522	270.523	270.523	270.523	270.523	270.523	270.523	270.523	270.523	270.523	270.523	270.523	270.523	270.523	270.523	270.523	270.523	270.523	270.523
R0271	202.453	202.453	202.453	202.453	202.453	202.452	202.453	202.453	202.453	202.453	202.453	202.453	202.453	202.453	202.453	202.453	202.453	202.453	202.453	202.453	202.453	202.343	202.453	202.453	202.453	202.452	202.453	202.453	202.453	202.453	202.452	202.453	202.453	202.453	202.453	202.453	202.453	202.453	202.453	202.453	202.453	202.453	202.453	202.453	202.453	202.453	202.453	202.453	202.453
R0272	269.875	269.875	269.875	269.875	269.875	269.875	269.875	269.875	269.875	269.875	269.875	269.875	269.875	269.875	269.875	269.875	269.875	269.875	269.875	269.875	269.875	269.739	269.875	269.875	269.875	269.875	269.875	269.875	269.875	269.875	269.875	269.875	269.875	269.875	269.875	269.875	269.875	269.875	269.875	269.875	269.875	269.875	269.875	269.875	269.875	269.875	269.875	269.875	269.875
R0273	202.435	202.435	202.435	202.435	202.435	202.434	202.435	202.435	202.435	202.435	202.435	202.435	202.435	202.435	202.435	202.435	202.435	202.435	202.435	202.435	202.435	202.325	202.435	202.435	202.435	202.434	202.435	202.435	202.435	202.435	202.434	202.435	202.435	202.435	202.435	202.435	202.435	202.435	202.435	202.435	202.435	202.435	202.435	202.435	202.435	202.435	202.435	202.435	202.435
R0274	19.2086	19.2086	19.2086	19.2086	19.2086	19.2086	19.2086	19.2086	19.2086	19.2086	19.2086	19.2086	19.2086	19.2086	19.2086	19.2086	19.2086	19.2086	19.2086	19.2086	19.2086	19.2086	19.2086	19.2086	19.2086	19.2086	19.2086	19.2086	19.2086	19.2086	19.2086	19.2086	19.2086	19.2086	19.2086	19.2086	19.2086	19.2086	19.2086	19.2086	19.2086	19.2086	19.2086	19.2086	19.2086	19.2086	19.2086	19.2086	19.2086
R0275	0.0102017	0.0102017	0.0102017	0.0102017	0.0102017	0.0102017	0.0102017	0.0102017	0.0102017	0.0102017	0.0102017	0.0102017	0.0102017	0.0102017	0.0102017	0.0102017	0.0102017	0.0102017	0.0102017	0.0102017	0.0102017	0.0102017	0.0102017	0.0102017	0.0102017	0.0102017	0.0102017	0.0102017	0.0102017	0.0102017	0.0102017	0.0102017	0.0102017	0.0102017	0.0102017	0.0102017	0.0102017	0.0102017	0.0102017	0.0102017	0.0102017	0.0102017	0.0102017	0.0102017	0.0102017	0.0102017	0.0102017	0.0102017	0.0102017
R0276	1000	1000	1000	1000	1000	1000	1000	1000	1000	1000	1000	1000	1000	1000	1000	1000	1000	1000	1000	1000	1000	1000	1000	1000	1000	1000	1000	1000	1000	1000	1000	1000	1000	1000	1000	1000	1000	1000	1000	1000	1000	1000	1000	1000	1000	1000	1000	1000	1000
R0277	270.523	270.523	270.523	270.523	270.523	270.522	270.523	270.523	270.523	270.523	270.523	270.523	270.523	270.523	270.523	270.523	270.523	270.523	270.523	270.523	270.523	270.386	270.523	270.523	270.523	270.522	270.523	270.523	270.523	270.523	270.522	270.523	270.523	270.523	270.523	270.523	270.523	270.523	270.523	270.523	270.523	270.523	270.523	270.523	270.523	270.523	270.523	270.523	270.523
R0278	202.449	202.449	202.449	202.449	202.449	202.448	202.449	202.449	202.449	202.449	202.449	202.449	202.449	202.449	202.449	202.449	202.449	202.449	202.449	202.449	202.449	202.339	202.449	202.449	202.449	202.448	202.449	202.449	202.449	202.449	202.448	202.449	202.449	202.449	202.449	202.449	202.449	202.449	202.449	202.449	202.449	202.449	202.449	202.449	202.449	202.449	202.449	202.449	202.449
R0279	269.875	269.875	269.875	269.875	269.875	269.875	269.875	269.875	269.875	269.875	269.875	269.875	269.875	269.875	269.875	269.875	269.875	269.875	269.875	269.875	269.875	269.739	269.875	269.875	269.875	269.875	269.875	269.875	269.875	269.875	269.875	269.875	269.875	269.875	269.875	269.875	269.875	269.875	269.875	269.875	269.875	269.875	269.875	269.875	269.875	269.875	269.875	269.875	269.875
R0280	202.449	202.449	202.449	202.449	202.449	202.448	202.449	202.449	202.449	202.449	202.449	202.449	202.449	202.449	202.449	202.449	202.449	202.449	202.449	202.449	202.449	202.339	202.449	202.449	202.449	202.448	202.449	202.449	202.449	202.449	202.448	202.449	202.449	202.449	202.449	202.449	202.449	202.449	202.449	202.449	202.449	202.449	202.449	202.449	202.449	202.449	202.449	202.449	202.449
R0281	-1.80074	-1.80074	-1.80074	-1.80074	-1.80074	-1.80074	-1.80074	-1.80074	-1.80074	-1.80074	-1.80074	-1.80074	-1.80074	-1.80074	-1.80074	-1.80074	-1.80074	-1.80074	-1.80074	-1.80074	-1.80074	-1.80074	-1.80074	-1.80074	-1.80074	-1.80074	-1.80074	-1.80074	-1.80074	-1.80074	-1.80074	-1.80074	-1.80074	-1.80074	-1.80074	-1.80074	-1.80074	-1.80074	-1.80074	-1.80074	-1.80074	-1.80074	-1.80074	-1.80074	-1.80074	-1.80074	-1.80074	-1.80074	-1.80074
R0282	202.453	202.453	202.453	202.453	202.453	202.452	202.453	202.453	202.453	202.453	202.453	202.453	202.453	202.453	202.453	202.453	202.453	202.453	202.453	202.453	202.453	202.343	202.453	202.453	202.453	202.452	202.453	202.453	202.453	202.453	202.452	202.453	202.453	202.453	202.453	202.453	202.453	202.453	202.453	202.453	202.453	202.453	202.453	202.453	202.453	202.453	202.453	202.453	202.453
R0284	1000	1000	1000	1000	1000	1000	1000	1000	1000	1000	1000	1000	1000	1000	1000	1000	1000	1000	1000	1000	1000	1000	1000	1000	1000	1000	1000	1000	1000	1000	1000	1000	1000	1000	1000	1000	1000	1000	1000	1000	1000	1000	1000	1000	1000	1000	1000	1000	1000
R0285	1000	1000	1000	1000	1000	1000	1000	1000	1000	1000	1000	1000	1000	1000	1000	1000	1000	1000	1000	1000	1000	1000	1000	1000	1000	1000	1000	1000	1000	1000	1000	1000	1000	1000	1000	1000	1000	1000	1000	1000	1000	1000	1000	1000	1000	1000	1000	1000	1000
R0286	1000	1000	1000	1000	1000	1000	1000	1000	1000	1000	1000	1000	1000	1000	1000	1000	1000	1000	1000	1000	1000	1000	1000	1000	1000	1000	1000	1000	1000	1000	1000	1000	1000	1000	1000	1000	1000	1000	1000	1000	1000	1000	1000	1000	1000	1000	1000	1000	1000
R0287	-1.52979e-28	-1.52979e-28	-1.52979e-28	-1.52979e-28	-3.34641e-28	1.38135e-26	4.72857e-25	-1.52979e-28	-1.52979e-28	-1.52979e-28	-4.19795e-29	-1.52979e-28	-3.34641e-28	-1.0131e-25	-1.52979e-28	-1.52979e-28	2.67713e-27	-1.52979e-28	0	-1.52979e-28	2.67713e-27	0	0	-1.81662e-28	0	2.4142e-28	9.94362e-28	3.82447e-29	-1.52979e-28	0	2.4142e-28	-1.52979e-28	-1.52979e-28	-1.0131e-25	-1.52979e-28	-1.52979e-28	-1.52979e-28	-1.52979e-28	0	-2.10346e-28	-1.52979e-28	0	0	-1.52979e-28	-1.52979e-28	-1.52979e-28	-1.0131e-25	-8.17218e-28	1.22383e-27
R0288	0	0	0	0	0	0	0	0	0	0	0	0	0	0	0	0	0	0	0	0	0	0	0	0	0	0	0	0	0	0	0	0	0	0	0	0	0	0	0	0	0	0	0	0	0	0	0	0	0
R0289	1000	1000	1000	1000	1000	1000	1000	1000	1000	1000	1000	1000	1000	1000	1000	1000	1000	1000	1000	1000	1000	1000	1000	1000	1000	1000	1000	1000	1000	1000	1000	1000	1000	1000	1000	1000	1000	1000	1000	1000	1000	1000	1000	1000	1000	1000	1000	1000	1000
R0290	0.000314746	0.000314746	0.000314746	0.000314746	0.000314746	0.000314746	0.000314746	0.000314746	0.000314746	0.000314746	0.000314746	0.000314746	0.000314746	0.000314746	0.000314746	0.000314746	0.000314746	0.000314746	0.000314746	0.000314746	0.000314746	0.000314746	0.000314746	0.000314746	0.000314746	0.000314746	0.000314746	0.000314746	0.000314746	0.000314746	0.000314746	0.000314746	0.000314746	0.000314746	0.000314746	0.000314746	0.000314746	0.000314746	0.000314746	0.000314746	0.000314746	0.000314746	0.000314746	0.000314746	0.000314746	0.000314746	0.000314746	0.000314746	0.000314746
R0291	0.00110161	0.00110161	0.00110161	0.00110161	0.00110161	0.00110161	0.00110161	0.00110161	0.00110161	0.00110161	0.00110161	0.00110161	0.00110161	0.00110161	0.00110161	0.00110161	0.00110161	0.00110161	0.00110161	0.00110161	0.00110161	0.00110161	0.00110161	0.00110161	0.00110161	0.00110161	0.00110161	0.00110161	0.00110161	0.00110161	0.00110161	0.00110161	0.00110161	0.00110161	0.00110161	0.00110161	0.00110161	0.00110161	0.00110161	0.00110161	0.00110161	0.00110161	0.00110161	0.00110161	0.00110161	0.00110161	0.00110161	0.00110161	0.00110161
R0292	0	0	0	0	0	0	0	0	0	0	0	0	0	0	0	0	0	0	0	0	0	0	0	0	0	0	0	0	0	0	0	0	0	0	0	0	0	0	0	0	0	0	0	0	0	0	0	0	0
R0293	0.00110161	0.00110161	0.00110161	0.00110161	0.00110161	0.00110161	0.00110161	0.00110161	0.00110161	0.00110161	0.00110161	0.00110161	0.00110161	0.00110161	0.00110161	0.00110161	0.00110161	0.00110161	0.00110161	0.00110161	0.00110161	0.00110161	0.00110161	0.00110161	0.00110161	0.00110161	0.00110161	0.00110161	0.00110161	0.00110161	0.00110161	0.00110161	0.00110161	0.00110161	0.00110161	0.00110161	0.00110161	0.00110161	0.00110161	0.00110161	0.00110161	0.00110161	0.00110161	0.00110161	0.00110161	0.00110161	0.00110161	0.00110161	0.00110161
R0294	250.815	250.815	250.815	250.815	250.815	250.814	250.815	250.815	250.815	250.815	250.815	250.815	250.815	250.815	250.815	250.815	250.815	250.815	250.815	250.815	250.815	250.678	250.815	250.815	250.815	250.814	250.815	250.815	250.815	250.815	250.814	250.815	250.815	250.815	250.815	250.815	250.815	250.815	250.815	250.815	250.815	250.815	250.815	250.815	250.815	250.815	250.815	250.815	250.815
R0295	250.815	250.815	250.815	250.815	250.815	250.814	250.815	250.815	250.815	250.815	250.815	250.815	250.815	250.815	250.815	250.815	250.815	250.815	250.815	250.815	250.815	250.678	250.815	250.815	250.815	250.814	250.815	250.815	250.815	250.815	250.814	250.815	250.815	250.815	250.815	250.815	250.815	250.815	250.815	250.815	250.815	250.815	250.815	250.815	250.815	250.815	250.815	250.815	250.815
R0296	250.815	250.815	250.815	250.815	250.815	250.814	250.815	250.815	250.815	250.815	250.815	250.815	250.815	250.815	250.815	250.815	250.815	250.815	250.815	250.815	250.815	250.678	250.815	250.815	250.815	250.814	250.815	250.815	250.815	250.815	250.814	250.815	250.815	250.815	250.815	250.815	250.815	250.815	250.815	250.815	250.815	250.815	250.815	250.815	250.815	250.815	250.815	250.815	250.815
R0303	0	0	0	0	0	0	0	0	0	0	0	0	0	0	0	0	0	0	0	0	0	0	0	0	0	0	0	0	0	0	0	0	0	0	0	0	0	0	0	0	0	0	0	0	0	0	0	0	0
R0304	0	0	0	0	0	0	0	0	0	0	0	0	0	0	0	0	0	0	0	0	0	0	0	0	0	0	0	0	0	0	0	0	0	0	0	0	0	0	0	0	0	0	0	0	0	0	0	0	0
R0305	0	0	0	0	0	0	0	0	0	0	0	0	0	0	0	0	0	0	0	0	0	0	0	0	0	0	0	0	0	0	0	0	0	0	0	0	0	0	0	0	0	0	0	0	0	0	0	0	0
R0307	81.9084	81.9084	81.9084	81.9084	81.9084	81.9082	81.9084	81.9084	81.9084	81.9084	81.9084	81.9084	81.9084	81.9084	81.9084	81.9084	81.9084	81.9084	81.9084	81.9084	81.9084	81.8646	81.9084	81.9084	81.9084	81.9082	81.9084	81.9084	81.9084	81.9084	81.9082	81.9084	81.9084	81.9084	81.9084	81.9084	81.9084	81.9084	80.2609	81.9084	81.9084	81.9084	81.9084	81.9084	81.9084	81.9084	81.9084	81.9084	81.9084
R0308	81.9084	81.9084	81.9084	81.9084	81.9084	81.9082	81.9084	81.9084	81.9084	81.9084	81.9084	81.9084	81.9084	81.9084	81.9084	81.9084	81.9084	81.9084	81.9084	81.9084	81.9084	81.8646	81.9084	81.9084	81.9084	81.9082	81.9084	81.9084	81.9084	81.9084	81.9082	81.9084	81.9084	81.9084	81.9084	81.9084	81.9084	81.9084	81.9084	81.9084	81.9084	81.9084	81.9084	81.9084	81.9084	81.9084	81.9084	81.9084	81.9084
R0309	183.874	183.874	183.874	183.874	183.874	183.874	183.874	183.874	183.874	183.874	183.874	183.874	183.874	183.874	183.874	183.874	183.874	183.874	183.874	183.874	183.874	183.775	183.874	183.874	183.874	183.874	183.874	183.874	183.874	183.874	183.874	183.874	183.874	183.874	183.874	183.874	183.874	183.874	183.874	183.874	183.874	183.874	183.874	183.874	183.874	183.874	183.874	183.874	183.874
R0310	288.109	288.109	288.109	288.109	288.109	288.108	288.109	288.109	288.109	288.109	288.109	288.109	288.109	288.109	288.109	288.109	288.109	288.109	288.109	288.109	288.109	287.953	288.109	288.109	288.109	288.108	288.109	288.109	288.109	288.109	288.108	288.109	288.109	288.109	288.109	288.109	288.109	288.109	288.109	288.109	288.109	288.109	288.109	288.109	288.109	288.109	288.109	288.109	288.109
R0311	2.88109	2.88109	2.88109	2.88109	2.88109	2.88108	2.88109	2.88109	2.88109	2.88109	2.88109	2.88109	2.88109	2.88109	2.88109	2.88109	2.88109	2.88109	2.88109	2.88109	2.88109	2.87953	2.88109	2.88109	2.88109	2.88108	2.88109	2.88109	2.88109	2.88109	2.88108	2.88109	2.88109	2.88109	2.88109	2.88109	2.88109	2.88109	2.88109	2.88109	2.88109	2.88109	2.88109	2.88109	2.88109	2.88109	2.88109	2.88109	2.88109
R0312	286.646	286.646	286.646	286.646	286.646	286.645	286.646	286.646	286.646	286.646	286.646	286.646	286.646	286.646	286.646	286.646	286.646	286.646	286.646	286.646	286.646	286.49	286.646	286.646	286.646	286.645	286.646	286.646	286.646	286.646	286.645	286.646	286.646	286.646	286.646	286.646	286.646	286.646	286.646	286.646	286.646	286.646	286.646	286.646	286.646	286.646	286.646	286.646	286.646
R0313	1.64788	1.64788	1.64788	1.64788	1.64788	1.64788	1.64788	1.64788	1.64788	1.64788	1.64788	1.64788	1.64788	1.64788	1.64788	1.64788	1.64788	1.64788	1.64788	1.64788	1.64788	1.64788	1.64788	1.64788	1.64788	1.64788	1.64788	1.64788	1.64788	1.64788	1.64788	1.64788	1.64788	1.64788	1.64788	1.64788	1.64788	1.64788	0	1.64788	1.64788	1.64788	1.64788	1.64788	1.64788	1.64788	1.64788	1.64788	1.64788
R0314	0.000314746	0.000314746	0.000314746	0.000314746	0.000314746	0.000314746	0.000314746	0.000314746	0.000314746	0.000314746	0.000314746	0.000314746	0.000314746	0.000314746	0.000314746	0.000314746	0.000314746	0.000314746	0.000314746	0.000314746	0.000314746	0.000314746	0.000314746	0.000314746	0.000314746	0.000314746	0.000314746	0.000314746	0.000314746	0.000314746	0.000314746	0.000314746	0.000314746	0.000314746	0.000314746	0.000314746	0.000314746	0.000314746	0	0.000314746	0.000314746	0.000314746	0.000314746	0.000314746	0.000314746	0.000314746	0.000314746	0.000314746	0.000314746
R0315	0.000314746	0.000314746	0.000314746	0.000314746	0.000314746	0.000314746	0.000314746	0.000314746	0.000314746	0.000314746	0.000314746	0.000314746	0.000314746	0.000314746	0.000314746	0.000314746	0.000314746	0.000314746	0.000314746	0.000314746	0.000314746	0.000314746	0.000314746	0.000314746	0.000314746	0.000314746	0.000314746	0.000314746	0.000314746	0.000314746	0.000314746	0.000314746	0.000314746	0.000314746	0.000314746	0.000314746	0.000314746	0.000314746	0.000314746	0.000314746	0.000314746	0.000314746	0.000314746	0.000314746	0.000314746	0.000314746	0.000314746	0.000314746	0.000314746
R0316	182.411	182.411	182.411	182.411	182.411	182.411	182.411	182.411	182.411	182.411	182.411	182.411	182.411	182.411	182.411	182.411	182.411	182.411	182.411	182.411	182.411	182.312	182.411	182.411	182.411	182.411	182.411	182.411	182.411	182.411	182.411	182.411	182.411	182.411	182.411	182.411	182.411	182.411	182.411	182.411	182.411	182.411	182.411	182.411	182.411	182.411	182.411	182.411	182.411
R0317	80.2609	80.2609	80.2609	80.2609	80.2609	80.2606	80.2609	80.2609	80.2609	80.2609	80.2609	80.2609	80.2609	80.2609	80.2609	80.2609	80.2609	80.2609	80.2609	80.2609	80.2609	80.2171	80.2609	80.2609	80.2609	80.2606	80.2609	80.2609	80.2609	80.2609	80.2606	80.2609	80.2609	80.2609	80.2609	80.2609	80.2609	80.2609	80.2609	80.2609	80.2609	80.2609	80.2609	80.2609	80.2609	80.2609	80.2609	80.2609	80.2609
R0318	1.82411	1.82411	1.82411	1.82411	1.82411	1.82411	1.82411	1.82411	1.82411	1.82411	1.82411	1.82411	1.82411	1.82411	1.82411	1.82411	1.82411	1.82411	1.82411	1.82411	1.82411	1.82312	1.82411	1.82411	1.82411	1.82411	1.82411	1.82411	1.82411	1.82411	1.82411	1.82411	1.82411	1.82411	1.82411	1.82411	1.82411	1.82411	1.82411	1.82411	1.82411	1.82411	1.82411	1.82411	1.82411	1.82411	1.82411	1.82411	1.82411
R0319	288.109	288.109	288.109	288.109	288.109	288.108	288.109	288.109	288.109	288.109	288.109	288.109	288.109	288.109	288.109	288.109	288.109	288.109	288.109	288.109	288.109	287.953	288.109	288.109	288.109	288.108	288.109	288.109	288.109	288.109	288.108	288.109	288.109	288.109	288.109	288.109	288.109	288.109	288.109	288.109	288.109	288.109	288.109	288.109	288.109	288.109	288.109	288.109	288.109
R0320	182.411	182.411	182.411	182.411	182.411	182.411	182.411	182.411	182.411	182.411	182.411	182.411	182.411	182.411	182.411	182.411	182.411	182.411	182.411	182.411	182.411	182.312	182.411	182.411	182.411	182.411	182.411	182.411	182.411	182.411	182.411	182.411	182.411	182.411	182.411	182.411	182.411	182.411	182.411	182.411	182.411	182.411	182.411	182.411	182.411	182.411	182.411	0	182.411
R0323	182.411	182.411	182.411	182.411	182.411	182.411	182.411	182.411	182.411	182.411	182.411	182.411	182.411	182.411	182.411	182.411	182.411	182.411	182.411	182.411	182.411	182.312	182.411	182.411	182.411	182.411	182.411	182.411	182.411	182.411	182.411	182.411	182.411	182.411	182.411	182.411	182.411	182.411	182.411	182.411	182.411	182.411	182.411	182.411	182.411	182.411	182.411	182.411	182.411
R0324	182.411	182.411	182.411	182.411	182.411	182.411	182.411	182.411	182.411	182.411	182.411	182.411	182.411	182.411	182.411	182.411	182.411	182.411	182.411	182.411	182.411	182.312	182.411	182.411	182.411	182.411	182.411	182.411	182.411	182.411	182.411	182.411	182.411	182.411	182.411	182.411	182.411	182.411	182.411	182.411	182.411	182.411	182.411	182.411	182.411	182.411	182.411	0	182.411
R0325	1.82411	1.82411	1.82411	1.82411	1.82411	1.82411	1.82411	1.82411	1.82411	1.82411	1.82411	1.82411	1.82411	1.82411	1.82411	1.82411	1.82411	1.82411	1.82411	1.82411	1.82411	1.82312	1.82411	1.82411	1.82411	1.82411	1.82411	1.82411	1.82411	1.82411	1.82411	1.82411	1.82411	1.82411	1.82411	1.82411	1.82411	1.82411	1.82411	1.82411	1.82411	1.82411	1.82411	1.82411	1.82411	1.82411	1.82411	4.40644e-06	1.82411
R0334	0.124239	0.124239	0.124239	0.124239	0.124239	0.124239	0.124239	0.124239	0.124239	0.124239	0.124239	0.124239	0.124239	0.124239	0.124239	0.124239	0.124239	0.124239	0.124239	0.124239	0.124239	0.124239	0.124239	0.124239	0.124239	0.124239	0.124239	0.124239	0.124239	0.124239	0.124239	0.124239	0.124239	0.124239	0.124239	0.124239	0.124239	0.124239	0.124239	0.124239	0.124239	0.124239	0.124239	0.124239	0.124239	0.124239	0.124239	0.124239	0.124239
R0335	1.64788	1.64788	1.64788	1.64788	1.64788	1.64788	1.64788	1.64788	1.64788	1.64788	1.64788	1.64788	1.64788	1.64788	1.64788	1.64788	1.64788	1.64788	1.64788	1.64788	1.64788	1.64788	1.64788	1.64788	1.64788	1.64788	1.64788	1.64788	1.64788	1.64788	1.64788	1.64788	1.64788	1.64788	1.64788	1.64788	1.64788	1.64788	1.64788	1.64788	1.64788	1.64788	1.64788	1.64788	1.64788	1.64788	1.64788	1.64788	1.64788
R0336	1.64788	1.64788	1.64788	1.64788	1.64788	1.64788	1.64788	1.64788	1.64788	1.64788	1.64788	1.64788	1.64788	1.64788	1.64788	1.64788	1.64788	1.64788	1.64788	1.64788	1.64788	1.64788	1.64788	1.64788	1.64788	1.64788	1.64788	1.64788	1.64788	1.64788	1.64788	1.64788	1.64788	1.64788	1.64788	1.64788	1.64788	1.64788	1.64788	1.64788	1.64788	1.64788	1.64788	1.64788	1.64788	1.64788	1.64788	1.64788	1.64788
R0337	112.546	112.546	112.546	112.546	112.546	112.546	112.546	112.546	112.546	112.546	112.546	112.546	112.546	112.546	112.546	112.546	112.546	112.546	112.546	112.546	112.546	112.485	112.546	112.546	112.546	112.546	112.546	112.546	112.546	112.546	112.546	112.546	112.546	112.546	112.546	112.546	112.546	112.546	112.546	112.546	112.546	112.546	112.546	112.546	112.546	112.546	112.546	112.546	112.546
R0338	0.107557	0.107557	0.107557	0.107557	0.107557	0.107557	0.107557	0.107557	0.107557	0.107557	0.107557	0.107557	0.107557	0.107557	0.107557	0.107557	0.107557	0.107557	0.107557	0.107557	0.107557	0.107557	0.107557	0.107557	0.107557	0.107557	0.107557	0.107557	0.107557	0.107557	0.107557	0.107557	0.107557	0.107557	0.107557	0.107557	0.107557	0.107557	0.107557	0.107557	0.107557	0.107557	0.107557	0.107557	0.107557	0.107557	0.107557	0.107557	0.107557
R0339	0.0620039	0.0620039	0.0620039	0.0620039	0.0620039	0.0620039	0.0620039	0.0620039	0.0620039	0.0620039	0.0620039	0.0620039	0.0620039	0.0620039	0.0620039	0.0620039	0.0620039	0.0620039	0.0620039	0.0620039	0.0620039	0.0620039	0.0620039	0.0620039	0.0620039	0.0620039	0.0620039	0.0620039	0.0620039	0.0620039	0.0620039	0.0620039	0.0620039	0.0620039	0.0620039	0.0620039	0.0620039	0.0620039	0.0620039	0.0620039	0.0620039	0.0620039	0.0620039	0.0620039	0.0620039	0.0620039	0.0620039	0.0620039	0.0620039
R0341	182.411	182.411	182.411	182.411	182.411	182.411	182.411	182.411	182.411	182.411	182.411	182.411	182.411	182.411	182.411	182.411	182.411	182.411	182.411	182.411	182.411	182.312	182.411	182.411	182.411	182.411	182.411	182.411	182.411	182.411	182.411	182.411	182.411	182.411	182.411	182.411	182.411	182.411	182.411	182.411	182.411	182.411	182.411	182.411	182.411	182.411	182.411	182.411	182.411
R0342	182.411	182.411	182.411	182.411	182.411	182.411	182.411	182.411	182.411	182.411	182.411	182.411	182.411	182.411	182.411	182.411	182.411	182.411	182.411	182.411	182.411	182.312	182.411	182.411	182.411	182.411	182.411	182.411	182.411	182.411	182.411	182.411	182.411	182.411	182.411	182.411	182.411	182.411	182.411	182.411	182.411	182.411	182.411	182.411	182.411	182.411	182.411	0	182.411
R0343	0	0	0	0	0	0	0	0	0	0	0	0	0	0	0	0	0	0	0	0	0	0	0	0	0	0	0	0	0	0	0	0	0	0	0	0	0	0	0	0	0	0	0	0	0	0	0	0	0
R0344	0	0	0	0	0	0	0	0	0	0	0	0	0	0	0	0	0	0	0	0	0	0	0	0	0	0	0	0	0	0	0	0	0	0	0	0	0	0	0	0	0	0	0	0	0	0	0	0	0
R0345	0	0	0	0	0	0	0	0	0	0	0	0	0	0	0	0	0	0	0	0	0	0	0	0	0	0	0	0	0	0	0	0	0	0	0	0	0	0	0	0	0	0	0	0	0	0	0	0	0
R0346	112.422	112.422	112.422	112.422	112.422	112.422	112.422	112.422	112.422	112.422	112.422	112.422	112.422	112.422	112.422	112.422	112.422	112.422	112.422	112.422	112.422	112.362	112.422	112.422	112.422	112.422	112.422	112.422	112.422	112.422	112.422	112.422	112.422	112.422	112.422	112.422	112.422	112.422	112.422	112.422	112.422	112.422	112.422	112.422	112.422	112.422	112.422	112.422	112.422
R0347	112.368	112.368	112.368	112.368	112.368	112.367	112.368	112.368	112.368	112.368	112.368	112.368	112.368	112.368	112.368	112.368	112.368	112.368	112.368	112.368	112.368	112.307	112.368	112.368	112.368	112.367	112.368	112.368	112.368	112.368	112.367	112.368	112.368	112.368	112.368	112.368	112.368	112.368	112.368	112.368	112.368	112.368	112.368	112.368	112.368	112.368	112.368	112.368	112.368
R0348	0	0	0	0	0	0	0	0	0	0	0	0	0	0	0	0	0	0	0	0	0	0	0	0	0	0	0	0	0	0	0	0	0	0	0	0	0	0	0	0	0	0	0	0	0	0	0	0	0
R0349	0.0548755	0.0548755	0.0548755	0.0548755	0.0548755	0.0548755	0.0548755	0.0548755	0.0548755	0.0548755	0.0548755	0.0548755	0.0548755	0.0548755	0.0548755	0.0548755	0.0548755	0.0548755	0.0548755	0.0548755	0.0548755	0.0548755	0.0548755	0.0548755	0.0548755	0.0548755	0.0548755	0.0548755	0.0548755	0.0548755	0.0548755	0.0548755	0.0548755	0.0548755	0.0548755	0.0548755	0.0548755	0.0548755	0.0548755	0.0548755	0.0548755	0.0548755	0.0548755	0.0548755	0.0548755	0.0548755	0.0548755	0.0548755	0.0548755
R0350	1.12368	1.12368	1.12368	1.12368	1.12368	1.12367	1.12368	1.12368	1.12368	1.12368	1.12368	1.12368	1.12368	1.12368	1.12368	1.12368	1.12368	1.12368	1.12368	1.12368	1.12368	1.12307	1.12368	1.12368	1.12368	1.12367	1.12368	1.12368	1.12368	1.12368	1.12367	1.12368	1.12368	1.12368	1.12368	1.12368	1.12368	1.12368	1.12368	1.12368	1.12368	1.12368	1.12368	1.12368	1.12368	1.12368	1.12368	1.12368	1.12368
R0351	0	0	0	0	0	0	0	0	0	0	0	0	0	0	0	0	0	0	0	0	0	0	0	0	0	0	0	0	0	0	0	0	0	0	0	0	0	0	0	0	0	0	0	0	0	0	0	0	0
R0352	0	0	0	0	0	0	0	0	0	0	0	0	0	0	0	0	0	0	0	0	0	0	0	0	0	0	0	0	0	0	0	0	0	0	0	0	0	0	0	0	0	0	0	0	0	0	0	0	0
R0353	0	0	0	0	0	0	0	0	0	0	0	0	0	0	0	0	0	0	0	0	0	0	0	0	0	0	0	0	0	0	0	0	0	0	0	0	0	0	0	0	0	0	0	0	0	0	0	0	0
R0354	0	0	0	0	0	0	0	0	0	0	0	0	0	0	0	0	0	0	0	0	0	0	0	0	0	0	0	0	0	0	0	0	0	0	0	0	0	0	0	0	0	0	0	0	0	0	0	0	0
R0355	0	0	0	0	0	0	0	0	0	0	0	0	0	0	0	0	0	0	0	0	0	0	0	0	0	0	0	0	0	0	0	0	0	0	0	0	0	0	0	0	0	0	0	0	0	0	0	0	0
R0356	0.0548755	0.0548755	0.0548755	0.0548755	0.0548755	0.0548755	0.0548755	0.0548755	0.0548755	0.0548755	0.0548755	0.0548755	0.0548755	0.0548755	0.0548755	0.0548755	0.0548755	0.0548755	0.0548755	0.0548755	0.0548755	0.0548755	0.0548755	0.0548755	0.0548755	0.0548755	0.0548755	0.0548755	0.0548755	0.0548755	0.0548755	0.0548755	0.0548755	0.0548755	0.0548755	0.0548755	0.0548755	0.0548755	0.0548755	0.0548755	0.0548755	0.0548755	0.0548755	0.0548755	0.0548755	0.0548755	0.0548755	0.0548755	0.0548755
R0357	36.8564	36.8564	36.8564	36.8564	36.8564	36.8564	36.8564	36.8564	36.8564	36.8564	36.8564	36.8564	36.8564	36.8564	36.8564	36.8564	36.8564	36.8564	36.8564	36.8564	36.8564	36.8564	36.8564	36.8564	36.8564	36.8564	36.8564	36.8564	36.8564	36.8564	36.8564	36.8564	36.8564	36.8564	36.8564	36.8564	36.8564	36.8564	36.8564	36.8564	36.8564	36.8564	36.8564	36.8564	36.8564	36.8564	36.8564	36.8564	36.8564
R0358	286.646	286.646	286.646	286.646	286.646	286.645	286.646	286.646	286.646	286.646	286.646	286.646	286.646	286.646	286.646	286.646	286.646	286.646	286.646	286.646	286.646	286.49	286.646	286.646	286.646	286.645	286.646	286.646	286.646	286.646	286.645	286.646	286.646	286.646	286.646	286.646	286.646	286.646	286.646	286.646	286.646	286.646	286.646	286.646	286.646	286.646	286.646	286.646	286.646
R0359	501.63	501.63	501.63	501.63	501.63	501.629	501.63	501.63	501.63	501.63	501.63	501.63	501.63	501.63	501.63	501.63	501.63	501.63	501.63	501.63	501.63	501.357	501.63	501.63	501.63	501.629	501.63	501.63	501.63	501.63	501.629	501.63	501.63	501.63	501.63	501.63	501.63	501.63	501.63	501.63	501.63	501.63	501.63	501.63	501.63	501.63	501.63	501.63	501.63
R0360	38.1444	38.1444	38.1444	38.1444	38.1444	38.1444	38.1444	38.1444	38.1444	38.1444	38.1444	38.1444	38.1444	38.1444	38.1444	38.1444	38.1444	38.1444	38.1444	38.1444	38.1444	38.1444	38.1444	38.1444	38.1444	38.1444	38.1444	38.1444	38.1444	38.1444	38.1444	38.1444	38.1444	38.1444	38.1444	38.1444	38.1444	38.1444	38.1444	38.1444	38.1444	38.1444	38.1444	38.1444	38.1444	38.1444	38.1444	38.1444	38.1444
R0361	235.605	235.605	235.605	235.605	235.605	235.605	235.605	235.605	235.605	235.605	235.605	235.605	235.605	235.605	235.605	235.605	235.605	235.605	235.605	235.605	235.605	235.496	235.605	235.605	235.605	235.605	235.605	235.605	235.605	235.605	235.605	235.605	235.605	235.605	235.605	235.605	235.605	235.605	235.605	235.605	235.605	235.605	235.605	235.605	235.605	235.605	235.605	235.605	235.605
R0362	235.605	235.605	235.605	235.605	235.605	235.605	235.605	235.605	235.605	235.605	235.605	235.605	235.605	235.605	235.605	235.605	235.605	235.605	235.605	235.605	235.605	235.496	235.605	235.605	235.605	235.605	235.605	235.605	235.605	235.605	235.605	235.605	235.605	235.605	235.605	235.605	235.605	235.605	235.605	235.605	235.605	235.605	235.605	235.605	235.605	235.605	235.605	235.605	235.605
R0363	0	0	0	0	0	0	0	0	0	0	0	0	0	0	0	0	0	0	0	0	0	0	0	0	0	0	0	0	0	0	0	0	0	0	0	0	0	0	0	0	0	0	0	0	0	0	0	0	0
R0364	36.8564	36.8564	36.8564	36.8564	36.8564	36.8564	36.8564	36.8564	36.8564	36.8564	36.8564	36.8564	36.8564	36.8564	36.8564	36.8564	36.8564	36.8564	36.8564	36.8564	36.8564	36.8564	36.8564	36.8564	36.8564	36.8564	36.8564	36.8564	36.8564	36.8564	36.8564	36.8564	36.8564	36.8564	36.8564	36.8564	36.8564	36.8564	36.8564	36.8564	36.8564	36.8564	36.8564	36.8564	36.8564	36.8564	36.8564	36.8564	36.8564
R0365	-0.0124457	-0.0124457	-0.0124457	-0.0124457	-0.0124457	-0.0124457	-0.0124456	-0.0124457	-0.0124457	-0.0124457	-0.0124457	-0.0124457	-0.0124457	-0.0124457	-0.0124457	-0.0124457	-0.0124457	-0.0124457	-0.0124457	-0.0124457	-0.0124457	-0.0124457	-0.0124457	-0.0124457	-0.0124457	-0.0124457	-0.0124457	-0.0124457	-0.0124457	-0.0124457	-0.0124457	-0.0124457	-0.0124457	-0.0124457	-0.0124457	-0.0124457	-0.0124457	-0.0124457	-0.0124457	-0.0124457	-0.0124457	-0.0124457	-0.0124457	-0.0124457	-0.0124457	-0.0124457	-0.0124457	-0.0124457	-0.0124457
R0366	0.173507	0.173507	0.173507	0.173507	0.173507	0.173507	0.173507	0.173507	0.173507	0.173507	0.173507	0.173507	0.173507	0.173507	0.173507	0.173507	0.173507	0.173507	0.173507	0.173507	0.173507	0.173507	0.173507	0.173507	0.173507	0.173507	0.173507	0.173507	0.173507	0.173507	0.173507	0.173507	0.173507	0.173507	0.173507	0.173507	0.173507	0.173507	0.173507	0.173507	0.173507	0.173507	0.173507	0.173507	0.173507	0.173507	0.173507	0.173507	0.173507
R0367	38.1444	38.1444	38.1444	38.1444	38.1444	38.1444	38.1444	38.1444	38.1444	38.1444	38.1444	38.1444	38.1444	38.1444	38.1444	38.1444	38.1444	38.1444	38.1444	38.1444	38.1444	38.1444	38.1444	38.1444	38.1444	38.1444	38.1444	38.1444	38.1444	38.1444	38.1444	38.1444	38.1444	38.1444	38.1444	38.1444	38.1444	38.1444	38.1444	38.1444	38.1444	38.1444	38.1444	38.1444	38.1444	38.1444	38.1444	38.1444	38.1444
R0368	19.9023	19.9023	19.9023	19.9023	19.9023	19.9023	19.9023	19.9023	19.9023	19.9023	19.9023	19.9023	19.9023	19.9023	19.9023	19.9023	19.9023	19.9023	19.9023	19.9023	19.9023	19.9023	19.9023	19.9023	19.9023	19.9023	19.9023	19.9023	19.9023	19.9023	19.9023	19.9023	19.9023	19.9023	19.9023	19.9023	19.9023	19.9023	19.9023	19.9023	19.9023	19.9023	19.9023	19.9023	19.9023	19.9023	19.9023	19.9023	19.9023
R0369	-19.7162	-19.7162	-19.7162	-19.7162	-19.7162	-19.7162	-19.7162	-19.7162	-19.7162	-19.7162	-19.7162	-19.7162	-19.7162	-19.7162	-19.7162	-19.7162	-19.7162	-19.7162	-19.7162	-19.7162	-19.7162	-19.7162	-19.7162	-19.7162	-19.7162	-19.7162	-19.7162	-19.7162	-19.7162	-19.7162	-19.7162	-19.7162	-19.7162	-19.7162	-19.7162	-19.7162	-19.7162	-19.7162	-19.7162	-19.7162	-19.7162	-19.7162	-19.7162	-19.7162	-19.7162	-19.7162	-19.7162	-19.7162	-19.7162
R0370	231.731	231.731	231.731	231.731	231.731	231.73	231.731	231.731	231.731	231.731	231.731	231.731	231.731	231.731	231.731	231.731	231.731	231.731	231.731	231.731	231.731	231.594	231.731	231.731	231.731	231.73	231.731	231.731	231.731	231.731	231.73	231.731	231.731	231.731	231.731	231.731	231.731	231.731	231.731	231.731	231.731	231.731	231.731	231.731	231.731	231.731	231.731	231.731	231.731
R0371	384.822	384.822	384.822	384.822	384.822	384.821	384.822	384.822	384.822	384.822	384.822	384.822	384.822	384.822	384.822	384.822	384.822	384.822	384.822	384.822	384.822	384.623	384.822	384.822	384.822	384.821	384.822	384.822	384.822	384.822	384.821	384.822	384.822	384.822	384.822	384.822	384.822	384.822	384.822	384.822	384.822	384.822	384.822	384.822	384.822	384.822	384.822	384.822	384.822
R0374	0	0	0	0	0	0	0	0	0	0	0	0	0	0	0	0	0	0	0	0	0	1.41884e-28	0	0	0	0	0	0	0	0	0	0	0	0	0	0	0	0	0	0	0	0	0	0	0	0	0	0	0
R0376	19.9326	19.9326	19.9326	19.9326	19.9326	19.9326	19.9326	19.9326	19.9326	19.9326	19.9326	19.9326	19.9326	19.9326	19.9326	19.9326	19.9326	19.9326	19.9326	19.9326	19.9326	19.9326	19.9326	19.9326	19.9326	19.9326	19.9326	19.9326	19.9326	19.9326	19.9326	19.9326	19.9326	19.9326	19.9326	19.9326	19.9326	19.9326	19.9326	19.9326	19.9326	19.9326	19.9326	19.9326	19.9326	19.9326	19.9326	19.9326	19.9326
R0377	36.8564	36.8564	36.8564	36.8564	36.8564	36.8564	36.8564	36.8564	36.8564	36.8564	36.8564	36.8564	36.8564	36.8564	36.8564	36.8564	36.8564	36.8564	36.8564	36.8564	36.8564	36.8564	36.8564	36.8564	36.8564	36.8564	36.8564	36.8564	36.8564	36.8564	36.8564	36.8564	36.8564	36.8564	36.8564	36.8564	36.8564	36.8564	36.8564	36.8564	36.8564	36.8564	36.8564	36.8564	36.8564	36.8564	36.8564	36.8564	36.8564
R0379	521.533	521.533	521.533	521.533	521.533	521.531	521.533	521.533	521.533	521.533	521.533	521.533	521.533	521.533	521.533	521.533	521.533	521.533	19.9023	521.533	521.533	521.259	521.533	521.533	521.533	521.531	521.533	521.533	521.533	521.533	521.531	521.533	521.533	521.533	521.533	521.533	521.533	521.533	521.533	521.533	521.533	521.533	521.533	521.533	521.533	521.533	521.533	521.533	521.533
R0380	501.63	501.63	501.63	501.63	501.63	501.629	501.63	501.63	501.63	501.63	501.63	501.63	501.63	501.63	501.63	501.63	501.63	501.63	0	501.63	501.63	501.357	501.63	501.63	501.63	501.629	501.63	501.63	501.63	501.63	501.629	501.63	501.63	501.63	501.63	501.63	501.63	501.63	501.63	501.63	501.63	501.63	501.63	501.63	501.63	501.63	501.63	501.63	501.63
R0381	1000	1000	1000	1000	1000	1000	1000	1000	1000	1000	1000	1000	1000	1000	1000	1000	1000	1000	1000	1000	1000	1000	1000	1000	1000	1000	1000	1000	1000	1000	1000	1000	1000	1000	1000	1000	1000	1000	1000	1000	1000	1000	1000	1000	1000	1000	1000	1000	1000
R0382	539.751	539.751	539.751	539.751	539.751	539.75	539.751	539.751	539.751	539.751	539.751	539.751	539.751	539.751	539.751	539.751	539.751	539.751	539.751	539.751	539.751	539.477	539.751	539.751	539.751	539.75	539.751	539.751	539.751	539.751	539.75	539.751	539.751	539.751	539.751	539.751	539.751	539.751	539.751	539.751	539.751	539.751	539.751	539.751	539.751	539.751	539.751	539.751	539.751
R0383	0.0400838	0.0400838	0.0400838	0.0400838	0.0400838	0.0400838	0.0400838	0.0400838	0.0400838	0.0400838	0.0400838	0.0400838	0.0400838	0.0400838	0.0400838	0.0400838	0.0400838	0.0400838	0.0400838	0.0400838	0.0400838	0.0400838	0.0400838	0.0400838	0.0400838	0.0400838	0.0400838	0.0400838	0.0400838	0.0400838	0.0400838	0.0400838	0.0400838	0.0400838	0.0400838	0.0400838	0.0400838	0.0400838	0.0400838	0.0400838	0.0400838	0.0400838	0.0400838	0.0400838	0.0400838	0.0400838	0.0400838	0.0400838	0.0400838
R0384	200.652	200.652	200.652	200.652	200.652	200.652	200.652	200.652	200.652	200.652	200.652	200.652	200.652	200.652	200.652	200.652	200.652	200.652	200.652	200.652	200.652	200.543	200.652	200.652	200.652	200.652	200.652	200.652	200.652	200.652	200.652	200.652	200.652	200.652	200.652	200.652	200.652	200.652	200.652	200.652	200.652	200.652	200.652	200.652	200.652	200.652	200.652	200.652	200.652
R0385	0	0	0	0	0	0	0	0	0	0	0	0	0	0	0	0	0	0	0	0	0	0	0	0	0	0	0	0	0	0	0	0	0	0	0	0	0	0	0	0	0	0	0	0	0	0	0	0	0
R0386	0.000314746	0.000314746	0.000314746	0.000314746	0.000314746	0.000314746	0.000314746	0.000314746	0.000314746	0.000314746	0.000314746	0.000314746	0.000314746	0.000314746	0.000314746	0.000314746	0.000314746	0.000314746	0.000314746	0.000314746	0.000314746	0.000314746	0.000314746	0.000314746	0.000314746	0.000314746	0.000314746	0.000314746	0.000314746	0.000314746	0.000314746	0.000314746	0.000314746	0.000314746	0.000314746	0.000314746	0.000314746	0.000314746	0.000314746	0.000314746	0.000314746	0.000314746	0.000314746	0.000314746	0.000314746	0.000314746	0.000314746	0.000314746	0.000314746
R0387	1000	1000	1000	1000	1000	1000	1000	1000	1000	1000	1000	1000	1000	1000	1000	1000	1000	1000	1000	1000	1000	1000	1000	1000	1000	1000	1000	1000	1000	1000	1000	1000	1000	1000	1000	1000	1000	1000	1000	1000	1000	1000	1000	1000	1000	1000	1000	1000	1000
R0388	1000	1000	1000	1000	1000	1000	1000	1000	1000	1000	1000	1000	1000	1000	1000	1000	1000	1000	1000	1000	1000	1000	1000	1000	1000	1000	1000	1000	1000	1000	1000	1000	1000	1000	1000	1000	1000	1000	1000	1000	1000	1000	1000	1000	1000	1000	1000	1000	1000
R0389	0.00437326	0.00437326	0.00437326	0.00437326	0.00437326	0.00437326	0.00437326	0.00437326	0.00437326	0.00437326	0.00437326	0.00437326	0.00437326	0.00437326	0.00437326	0.00437326	0.00437326	0.00437326	0.00437326	0.00437326	0.00437326	0.00437326	0.00437326	0.00437326	0.00437326	0.00437326	0.00437326	0.00437326	0.00437326	0.00437326	0.00437326	0.00437326	0.00437326	0.00437326	0.00437326	0.00437326	0.00437326	0.00437326	0.00437326	0.00437326	0.00437326	0.00437326	0.00437326	0.00437326	0.00437326	0.00437326	0.00437326	0.00437326	0.00437326
R0390	0.00437326	0.00437326	0.00437326	0.00437326	0.00437326	0.00437326	0.00437326	0.00437326	0.00437326	0.00437326	0.00437326	0.00437326	0.00437326	0.00437326	0.00437326	0.00437326	0.00437326	0.00437326	0.00437326	0.00437326	0.00437326	0.00437326	0.00437326	0.00437326	0.00437326	0.00437326	0.00437326	0.00437326	0.00437326	0.00437326	0.00437326	0.00437326	0.00437326	0.00437326	0.00437326	0.00437326	0.00437326	0.00437326	0.00437326	0.00437326	0.00437326	0.00437326	0.00437326	0.00437326	0.00437326	0.00437326	0.00437326	0.00437326	0.00437326
R0391	-0.00415294	-0.00415294	-0.00415294	-0.00415294	-0.00415294	-0.00415294	-0.00415294	-0.00415294	-0.00415294	-0.00415294	-0.00415294	-0.00415294	-0.00415294	-0.00415294	-0.00415294	-0.00415294	-0.00415294	-0.00415294	-0.00415294	-0.00415294	-0.00415294	-0.00415294	-0.00415294	-0.00415294	-0.00415294	-0.00415294	-0.00415294	-0.00415294	-0.00415294	-0.00415294	-0.00415294	-0.00415294	-0.00415294	-0.00415294	-0.00415294	-0.00415294	-0.00415294	-0.00415294	-0.00415294	-0.00415294	-0.00415294	-0.00415294	-0.00415294	-0.00415294	-0.00415294	-0.00415294	-0.00415294	-0.00415294	-0.00415294
R0392	0.00437326	0.00437326	0.00437326	0.00437326	0.00437326	0.00437326	0.00437326	0.00437326	0.00437326	0.00437326	0.00437326	0.00437326	0.00437326	0.00437326	0.00437326	0.00437326	0.00437326	0.00437326	0.00437326	0.00437326	0.00437326	0.00437326	0.00437326	0.00437326	0.00437326	0.00437326	0.00437326	0.00437326	0.00437326	0.00437326	0.00437326	0.00437326	0.00437326	0.00437326	0.00437326	0.00437326	0.00437326	0.00437326	0.00437326	0.00437326	0.00437326	0.00437326	0.00437326	0.00437326	0.00437326	0.00437326	0.00437326	0.00437326	0.00437326
R0393	0.00437326	0.00437326	0.00437326	0.00437326	0.00437326	0.00437326	0.00437326	0.00437326	0.00437326	0.00437326	0.00437326	0.00437326	0.00437326	0.00437326	0.00437326	0.00437326	0.00437326	0.00437326	0.00437326	0.00437326	0.00437326	0.00437326	0.00437326	0.00437326	0.00437326	0.00437326	0.00437326	0.00437326	0.00437326	0.00437326	0.00437326	0.00437326	0.00437326	0.00437326	0.00437326	0.00437326	0.00437326	0.00437326	0.00437326	0.00437326	0.00437326	0.00437326	0.00437326	0.00437326	0.00437326	0.00437326	0.00437326	0.00437326	0.00437326
R0394	0.00437326	0.00437326	0.00437326	0.00437326	0.00437326	0.00437326	0.00437326	0.00437326	0.00437326	0.00437326	0.00437326	0.00437326	0.00437326	0.00437326	0.00437326	0.00437326	0.00437326	0.00437326	0.00437326	0.00437326	0.00437326	0.00437326	0.00437326	0.00437326	0.00437326	0.00437326	0.00437326	0.00437326	0.00437326	0.00437326	0.00437326	0.00437326	0.00437326	0.00437326	0.00437326	0.00437326	0.00437326	0.00437326	0.00437326	0.00437326	0.00437326	0.00437326	0.00437326	0.00437326	0.00437326	0.00437326	0.00437326	0.00437326	0.00437326
R0396	0.00437326	0.00437326	0.00437326	0.00437326	0.00437326	0.00437326	0.00437326	0.00437326	0.00437326	0.00437326	0.00437326	0.00437326	0.00437326	0.00437326	0.00437326	0.00437326	0.00437326	0.00437326	0.00437326	0.00437326	0.00437326	0.00437326	0.00437326	0.00437326	0.00437326	0.00437326	0.00437326	0.00437326	0.00437326	0.00437326	0.00437326	0.00437326	0.00437326	0.00437326	0.00437326	0.00437326	0.00437326	0.00437326	0.00437326	0.00437326	0.00437326	0.00437326	0.00437326	0.00437326	0.00437326	0.00437326	0.00437326	0.00437326	0.00437326
R0398	0.00437326	0.00437326	0.00437326	0.00437326	0.00437326	0.00437326	0.00437326	0.00437326	0.00437326	0.00437326	0.00437326	0.00437326	0.00437326	0.00437326	0.00437326	0.00437326	0.00437326	0.00437326	0.00437326	0.00437326	0.00437326	0.00437326	0.00437326	0.00437326	0.00437326	0.00437326	0.00437326	0.00437326	0.00437326	0.00437326	0.00437326	0.00437326	0.00437326	0.00437326	0.00437326	0.00437326	0.00437326	0.00437326	0.00437326	0.00437326	0.00437326	0.00437326	0.00437326	0.00437326	0.00437326	0.00437326	0.00437326	0.00437326	0.00437326
R0399	0.00437326	0.00437326	0.00437326	0.00437326	0.00437326	0.00437326	0.00437326	0.00437326	0.00437326	0.00437326	0.00437326	0.00437326	0.00437326	0.00437326	0.00437326	0.00437326	0.00437326	0.00437326	0.00437326	0.00437326	0.00437326	0.00437326	0.00437326	0.00437326	0.00437326	0.00437326	0.00437326	0.00437326	0.00437326	0.00437326	0.00437326	0.00437326	0.00437326	0.00437326	0.00437326	0.00437326	0.00437326	0.00437326	0.00437326	0.00437326	0.00437326	0.00437326	0.00437326	0.00437326	0.00437326	0.00437326	0.00437326	0.00437326	0.00437326
R0400	0.00159253	0.00159253	0.00159253	0.00159253	0.00159253	0.00159253	0.00159253	0.00159253	0.00159253	0.00159253	0.00159253	0.00159253	0.00159253	0.00159253	0.00159253	0.00159253	0.00137092	0.00159253	0.00159253	0.00159253	0.00137092	0.00159253	0.00159253	0.00159253	0.00159253	0.00159253	0.00159253	0.00159253	0.00159253	0.00145265	0.00159253	0.00159253	0.00159253	0.00159253	0.00159253	0.00159253	0.00159253	0.00159253	0.00159253	0.00159253	0.00159253	0.00159253	0.00159253	0.00159253	0.00159253	0.00159253	0.00159253	0.00159253	0.00159253
R0401	0	0	0	0	0	0	0	0	0	0	0	0	0	0	0	0	0	0	0	0	0	0	0	0	0	0	0	0	0	0	0	0	0	0	0	0	0	0	0	0	0	0	0	0	0	0	0	0	0
R0402	0	0	0	0	0	0	0	0	0	0	0	0	0	0	0	0	0	0	0	0	0	0	0	0	0	0	0	0	0	0	0	0	0	0	0	0	0	0	0	0	0	0	0	0	0	0	0	0	0
R0403	0	0	0	0	0	0	0	0	0	0	0	0	0	0	0	0	0	0	0	0	0	0	0	0	0	0	0	0	0	0	0	0	0	0	0	0	0	0	0	0	0	0	0	0	0	0	0	0	0
R0404	0	0	0	0	0	0	0	0	0	0	0	0	0	0	0	0	0	0	0	0	0	0	0	0	0	0	0	0	0	0	0	0	0	0	0	0	0	0	0	0	0	0	0	0	0	0	0	0	0
R0405	0	0	0	0	0	0	0	0	0	0	0	0	0	0	0	0	0	0	0	0	0	0	0	0	0	0	0	0	0	0	0	0	0	0	0	0	0	0	0	0	0	0	0	0	0	0	0	0	0
R0414	0.00953002	0.00953002	0.00953002	0.00953002	0.00953002	0.00953002	0.00953002	0.00953002	0.00953002	0.00953002	0.00953002	0.00953002	0.00953002	0.00953002	0.00953002	0.00953002	0.00953002	0.00953002	0.00953002	0.00953002	0.00953002	0.00953002	0.00953002	0.00953002	0.00953002	0.00953002	0.00953002	0.00953002	0.00953002	0.00953002	0.00953002	0.00953002	0.00953002	0.00953002	0.00953002	0.00953002	0.00953002	0.00953002	0.00953002	0.00953002	0.00953002	0.00953002	0.00953002	0.00953002	0.00953002	0.00953002	0.00953002	0.00953002	0.00953002
R0415	0.0096874	0.0096874	0.0096874	0.0096874	0.0096874	0.0096874	0.0096874	0.0096874	0.0096874	0.0096874	0.0096874	0.0096874	0.0096874	0.0096874	0.0096874	0.0096874	0.0096874	0.0096874	0.0096874	0.0096874	0.0096874	0.0096874	0.0096874	0.0096874	0.0096874	0.0096874	0.0096874	0.0096874	0.0096874	0.0096874	0.0096874	0.0096874	0.0096874	0.0096874	0.0096874	0.0096874	0.0096874	0.0096874	0.0096874	0.0096874	0.0096874	0.0096874	0.0096874	0.0096874	0.0096874	0.0096874	0.0096874	0.0096874	0.0096874
R0416	-0.00937265	-0.00937265	-0.00937265	-0.00937265	-0.00937265	-0.00937265	-0.00937265	-0.00937265	-0.00937265	-0.00937265	-0.00937265	-0.00937265	-0.00937265	-0.00937265	-0.00937265	-0.00937265	-0.00937265	-0.00937265	-0.00937265	-0.00937265	-0.00937265	-0.00937265	-0.00937265	-0.00937265	-0.00937265	-0.00937265	-0.00937265	-0.00937265	-0.00937265	-0.00937265	-0.00937265	-0.00937265	-0.00937265	-0.00937265	-0.00937265	-0.00937265	-0.00937265	-0.00937265	-0.00937265	-0.00937265	-0.00937265	-0.00937265	-0.00937265	-0.00937265	-0.00937265	-0.00937265	-0.00937265	-0.00937265	-0.00937265
R0417	0.0096874	0.0096874	0.0096874	0.0096874	0.0096874	0.0096874	0.0096874	0.0096874	0.0096874	0.0096874	0.0096874	0.0096874	0.0096874	0.0096874	0.0096874	0.0096874	0.0096874	0.0096874	0.0096874	0.0096874	0.0096874	0.0096874	0.0096874	0.0096874	0.0096874	0.0096874	0.0096874	0.0096874	0.0096874	0.0096874	0.0096874	0.0096874	0.0096874	0.0096874	0.0096874	0.0096874	0.0096874	0.0096874	0.0096874	0.0096874	0.0096874	0.0096874	0.0096874	0.0096874	0.0096874	0.0096874	0.0096874	0.0096874	0.0096874
R0419	0.0096874	0.0096874	0.0096874	0.0096874	0.0096874	0.0096874	0.0096874	0.0096874	0.0096874	0.0096874	0.0096874	0.0096874	0.0096874	0.0096874	0.0096874	0.0096874	0.0096874	0.0096874	0.0096874	0.0096874	0.0096874	0.0096874	0.0096874	0.0096874	0.0096874	0.0096874	0.0096874	0.0096874	0.0096874	0.0096874	0.0096874	0.0096874	0.0096874	0.0096874	0.0096874	0.0096874	0.0096874	0.0096874	0.0096874	0.0096874	0.0096874	0.0096874	0.0096874	0.0096874	0.0096874	0.0096874	0.0096874	0.0096874	0.0096874
R0420	-0.00937265	-0.00937265	-0.00937265	-0.00937265	-0.00937265	-0.00937265	-0.00937265	-0.00937265	-0.00937265	-0.00937265	-0.00937265	-0.00937265	-0.00937265	-0.00937265	-0.00937265	-0.00937265	-0.00937265	-0.00937265	-0.00937265	-0.00937265	-0.00937265	-0.00937265	-0.00937265	-0.00937265	-0.00937265	-0.00937265	-0.00937265	-0.00937265	-0.00937265	-0.00937265	-0.00937265	-0.00937265	-0.00937265	-0.00937265	-0.00937265	-0.00937265	-0.00937265	-0.00937265	-0.00937265	-0.00937265	-0.00937265	-0.00937265	-0.00937265	-0.00937265	-0.00937265	-0.00937265	-0.00937265	-0.00937265	-0.00937265
R0421	0.00953002	0.00953002	0.00953002	0.00953002	0.00953002	0.00953002	0.00953002	0.00953002	0.00953002	0.00953002	0.00953002	0.00953002	0.00953002	0.00953002	0.00953002	0.00953002	0.00953002	0.00953002	0.00953002	0.00953002	0.00953002	0.00953002	0.00953002	0.00953002	0.00953002	0.00953002	0.00953002	0.00953002	0.00953002	0.00953002	0.00953002	0.00953002	0.00953002	0.00953002	0.00953002	0.00953002	0.00953002	0.00953002	0.00953002	0.00953002	0.00953002	0.00953002	0.00953002	0.00953002	0.00953002	0.00953002	0.00953002	0.00953002	0.00953002
R0422	0.00953002	0.00953002	0.00953002	0.00953002	0.00953002	0.00953002	0.00953002	0.00953002	0.00953002	0.00953002	0.00953002	0.00953002	0.00953002	0.00953002	0.00953002	0.00953002	0.00953002	0.00953002	0.00953002	0.00953002	0.00953002	0.00953002	0.00953002	0.00953002	0.00953002	0.00953002	0.00953002	0.00953002	0.00953002	0.00953002	0.00953002	0.00953002	0.00953002	0.00953002	0.00953002	0.00953002	0.00953002	0.00953002	0.00953002	0.00953002	0.00953002	0.00953002	0.00953002	0.00953002	0.00953002	0.00953002	0.00953002	0.00953002	0.00953002
R0423	0.000314746	0.000314746	0.000314746	0.000314746	0.000314746	0.000314746	0.000314746	0.000314746	0.000314746	0.000314746	0.000314746	0.000314746	0.000314746	0.000314746	0.000314746	0.000314746	0.000314746	0.000314746	0.000314746	0.000314746	0.000314746	0.000314746	0.000314746	0.000314746	0.000314746	0.000314746	0.000314746	0.000314746	0.000314746	0.000314746	0.000314746	0.000314746	0.000314746	0.000314746	0.000314746	0.000314746	0.000314746	0.000314746	0.000314746	0.000314746	0.000314746	0.000314746	0.000314746	0.000314746	0.000314746	0.000314746	0.000314746	0.000314746	0.000314746
R0424	0.000314746	0.000314746	0.000314746	0.000314746	0.000314746	0.000314746	0.000314746	0.000314746	0.000314746	0.000314746	0.000314746	0.000314746	0.000314746	0.000314746	0.000314746	0.000314746	0.000314746	0.000314746	0.000314746	0.000314746	0.000314746	0.000314746	0.000314746	0.000314746	0.000314746	0.000314746	0.000314746	0.000314746	0.000314746	0.000314746	0.000314746	0.000314746	0.000314746	0.000314746	0.000314746	0.000314746	0.000314746	0.000314746	0.000314746	0.000314746	0.000314746	0.000314746	0.000314746	0.000314746	0.000314746	0.000314746	0.000314746	0.000314746	0.000314746
R0428	0.000314746	0.000314746	0.000314746	0.000314746	0.000314746	0.000314746	0.000314746	0.000314746	0.000314746	0.000314746	0.000314746	0.000314746	0.000314746	0.000314746	0.000314746	0.000314746	0.000314746	0.000314746	0.000314746	0.000314746	0.000314746	0.000314746	0.000314746	0.000314746	0.000314746	0.000314746	0.000314746	0.000314746	0.000314746	0.000314746	0.000314746	0.000314746	0.000314746	0.000314746	0.000314746	0.000314746	0.000314746	0.000314746	0.000314746	0.000314746	0.000314746	0.000314746	0.000314746	0.000314746	0.000314746	0.000314746	0.000314746	0.000314746	0.000314746
R0430	0.00220322	0.00220322	0.00220322	0.00220322	0.00220322	0	0.00220322	0.00220322	0.00220322	0.00220322	0.00220322	0.00220322	0.00220322	0.00220322	0.00220322	0.00220322	0.00220322	0.00220322	0.00220322	0.00220322	0.00220322	0.00220322	0.00220322	0.00220322	0.00220322	0	0.00220322	0.00220322	0.00220322	0.00220322	0	0.00220322	0.00220322	0.00220322	0.00220322	0.00220322	0.00220322	0.00220322	0.00220322	0.00220322	0.00220322	0.00220322	0.00220322	0.00220322	0.00220322	0.00220322	0.00220322	0.00220322	0.00220322
R0431	0.00220322	0.00220322	0.00220322	0.00220322	0.00220322	0	0.00220322	0.00220322	0.00220322	0.00220322	0.00220322	0.00220322	0.00220322	0.00220322	0.00220322	0.00220322	0.00220322	0.00220322	0.00220322	0.00220322	0.00220322	0.00220322	0.00220322	0.00220322	0.00220322	0	0.00220322	0.00220322	0.00220322	0.00220322	0	0.00220322	0.00220322	0.00220322	0.00220322	0.00220322	0.00220322	0.00220322	0.00220322	0.00220322	0.00220322	0.00220322	0.00220322	0.00220322	0.00220322	0.00220322	0.00220322	0.00220322	0.00220322
R0432	0.00220322	0.00220322	0.00220322	0.00220322	0.00220322	0	0.00220322	0.00220322	0.00220322	0.00220322	0.00220322	0.00220322	0.00220322	0.00220322	0.00220322	0.00220322	0.00220322	0.00220322	0.00220322	0.00220322	0.00220322	0.00220322	0.00220322	0.00220322	0.00220322	0	0.00220322	0.00220322	0.00220322	0.00220322	0	0.00220322	0.00220322	0.00220322	0.00220322	0.00220322	0.00220322	0.00220322	0.00220322	0.00220322	0.00220322	0.00220322	0.00220322	0.00220322	0.00220322	0.00220322	0.00220322	0.00220322	0.00220322
R0433	0.00110161	0.00110161	0.00110161	0.00110161	0.00110161	0	0.00110161	0.00110161	0.00110161	0.00110161	0.00110161	0.00110161	0.00110161	0.00110161	0.00110161	0.00110161	0.00110161	0.00110161	0.00110161	0.00110161	0.00110161	0.00110161	0.00110161	0.00110161	0.00110161	0	0.00110161	0.00110161	0.00110161	0.00110161	0	0.00110161	0.00110161	0.00110161	0.00110161	0.00110161	0.00110161	0.00110161	0.00110161	0.00110161	0.00110161	0.00110161	0.00110161	0.00110161	0.00110161	0.00110161	0.00110161	0.00110161	0.00110161
R0434	501.971	501.971	501.971	501.971	501.971	501.969	501.971	501.971	501.971	501.971	501.971	501.971	501.971	501.971	501.971	501.971	501.971	501.971	501.971	501.971	501.971	501.697	501.971	501.971	501.971	501.969	501.971	501.971	501.971	501.971	501.969	501.971	501.971	501.971	501.971	501.971	501.971	501.971	501.971	501.971	501.971	501.971	501.971	501.971	501.971	501.971	501.971	501.971	501.971
R0435	505.799	505.799	505.799	505.799	505.799	505.798	505.799	505.799	505.799	505.799	505.799	505.799	505.799	505.799	505.799	505.799	505.799	505.799	505.799	505.799	505.799	505.594	505.799	505.799	505.799	505.798	505.799	505.799	505.799	505.799	505.798	505.799	505.799	505.799	505.799	505.799	505.799	505.799	505.799	505.799	505.799	505.799	505.799	505.799	505.799	505.799	505.799	505.799	505.799
R0436	501.63	501.63	501.63	501.63	501.63	501.629	501.63	501.63	501.63	501.63	501.63	501.63	501.63	501.63	501.63	501.63	501.63	501.63	501.63	501.63	501.63	501.63	501.63	501.63	501.63	501.629	501.63	501.63	501.63	501.63	501.629	501.63	501.63	501.63	501.63	501.63	501.63	501.63	501.63	501.63	501.63	501.63	501.63	501.63	501.63	501.63	501.63	501.63	501.63
R0437	851.283	851.283	851.283	851.283	851.283	851.281	851.283	851.283	851.283	851.283	851.283	851.283	851.283	851.283	851.283	851.283	851.283	851.283	851.283	851.283	851.283	851.191	851.283	851.283	851.283	851.281	851.283	851.283	851.283	851.283	851.281	851.283	851.283	851.283	851.283	851.283	851.283	851.283	851.283	851.283	851.283	851.283	851.283	851.283	851.283	851.283	851.283	851.283	851.283
R0438	0	0	0	0	0	0	0	0	0	0	0	0	0	0	0	0	0	0	0	0	0	0	0	0	0	0	0	0	0	0	0	0	0	0	0	0	0	0	0	0	0	0	0	0	0	0	0	0	0
R0439	0	0	0	0	0	0	0	0	0	0	0	0	0	0	0	0	0	0	0	0	0	0	0	0	0	0	0	0	0	0	0	0	0	0	0	0	0	0	0	0	0	0	0	0	0	0	0	0	0
R0440	3.21486e-13	3.21486e-13	3.21486e-13	3.21486e-13	0	-2.16829e-13	5.29479e-15	3.21486e-13	3.21486e-13	3.21486e-13	3.2407e-13	3.21486e-13	0	-5.39589e-14	3.21486e-13	3.21486e-13	1.3083e-13	3.21486e-13	5.83965e-13	3.21486e-13	1.3083e-13	-1.65855e-13	3.95931e-14	-2.81645e-13	-1.75346e-16	9.45104e-15	0	7.17817e-14	3.21486e-13	3.88228e-13	9.45104e-15	3.21486e-13	3.21486e-13	-5.39589e-14	3.21486e-13	3.21486e-13	3.21486e-13	3.21486e-13	-4.41914e-14	3.21486e-13	3.21486e-13	-3.80057e-13	-6.83574e-14	3.21486e-13	3.21486e-13	3.21486e-13	-5.39589e-14	-2.00007e-14	9.64533e-16
R0441	286.646	286.646	286.646	286.646	286.646	286.645	286.646	286.646	286.646	286.646	286.646	286.646	286.646	286.646	286.646	286.646	286.646	286.646	286.646	286.646	286.646	286.49	286.646	286.646	286.646	286.645	286.646	0	286.646	286.646	286.645	286.646	286.646	286.646	286.646	286.646	286.646	286.646	286.646	286.646	286.646	286.646	286.646	286.646	286.646	286.646	286.646	286.646	286.646
R0442	3.59499e-29	3.59499e-29	3.59499e-29	3.59499e-29	0	-7.19547e-28	0	3.59499e-29	3.59499e-29	3.59499e-29	-6.84969e-28	3.59499e-29	0	5.14478e-24	3.59499e-29	3.59499e-29	5.90127e-27	3.59499e-29	4.85718e-28	3.59499e-29	5.90127e-27	-3.59499e-29	-2.33263e-28	-1.79921e-29	-2.81013e-28	-5.48853e-30	-1.35523e-13	3.59842e-29	3.59499e-29	-1.64656e-30	-5.48853e-30	3.59499e-29	3.59499e-29	5.14478e-24	3.59499e-29	3.59499e-29	3.59499e-29	3.59499e-29	0	1.79887e-28	3.59499e-29	-4.39083e-28	1.03184e-28	3.59499e-29	3.59499e-29	3.59499e-29	5.14478e-24	2.28323e-27	0
R0443	286.646	286.646	286.646	286.646	286.646	286.645	286.646	286.646	286.646	286.646	286.646	286.646	286.646	286.646	286.646	286.646	286.646	286.646	286.646	286.646	286.646	286.49	286.646	286.646	286.646	286.645	286.646	0	286.646	286.646	286.645	286.646	286.646	286.646	286.646	286.646	286.646	286.646	286.646	286.646	286.646	286.646	286.646	286.646	286.646	286.646	286.646	286.646	286.646
R0444	501.63	501.63	501.63	501.63	501.63	501.629	501.63	501.63	501.63	501.63	501.63	501.63	501.63	501.63	501.63	501.63	501.63	501.63	501.63	501.63	501.63	501.357	501.63	501.63	501.63	501.629	501.63	501.63	501.63	501.63	501.629	501.63	501.63	501.63	501.63	501.63	501.63	501.63	501.63	501.63	501.63	501.63	501.63	501.63	501.63	501.63	501.63	501.63	501.63
R0445	0	0	0	0	0	0	0	0	0	0	0	0	0	0	0	0	0	0	0	0	0	0	0	0	0	0	0	0	0	0	0	0	0	0	0	0	0	0	0	0	0	0	0	0	0	0	0	0	0
R0446	501.63	501.63	501.63	501.63	501.63	501.629	501.63	501.63	501.63	501.63	501.63	501.63	501.63	501.63	501.63	501.63	501.63	501.63	501.63	501.63	501.63	501.357	501.63	501.63	501.63	501.629	501.63	501.63	501.63	501.63	501.629	501.63	501.63	501.63	501.63	501.63	501.63	501.63	501.63	501.63	501.63	501.63	501.63	501.63	501.63	501.63	501.63	501.63	501.63
R0447	0	0	0	0	0	0	0	0	0	0	0	0	0	0	0	0	0	0	0	0	0	0	0	0	0	0	0	0	0	0	0	0	0	0	0	0	0	0	0	0	0	0	0	0	0	0	0	0	0
R0448	501.63	501.63	501.63	501.63	501.63	501.629	501.63	501.63	501.63	501.63	501.63	501.63	501.63	501.63	501.63	501.63	501.63	501.63	501.63	501.63	501.63	501.357	501.63	501.63	501.63	501.629	501.63	501.63	501.63	501.63	501.629	501.63	501.63	501.63	501.63	501.63	501.63	501.63	501.63	501.63	501.63	501.63	501.63	501.63	501.63	501.63	501.63	501.63	501.63
R0449	501.63	501.63	501.63	501.63	501.63	501.629	501.63	501.63	501.63	501.63	501.63	501.63	501.63	501.63	501.63	501.63	501.63	501.63	501.63	501.63	501.63	501.357	501.63	501.63	501.63	501.629	501.63	501.63	501.63	501.63	501.629	501.63	501.63	501.63	501.63	501.63	501.63	501.63	501.63	501.63	501.63	501.63	501.63	501.63	501.63	501.63	501.63	501.63	501.63
R0450	-35.6617	-35.6617	-35.6617	-35.6617	-35.6617	-35.6617	-35.6617	-35.6617	-35.6617	-35.6617	-35.6617	-35.6617	-35.6617	-35.6617	-35.6617	-35.6617	-35.6617	-35.6617	-35.6617	-35.6617	-35.6617	-35.6617	-35.6617	-35.6617	-35.6617	-35.6617	-35.6617	-35.6617	-35.6617	-35.6617	-35.6617	-35.6617	-35.6617	-35.6617	-35.6617	-35.6617	-35.6617	-35.6617	-35.6617	-35.6617	-35.6617	-35.6617	-35.6617	-35.6617	-35.6617	-35.6617	-35.6617	-35.6617	-35.6617
R0451	999.012	999.012	999.012	999.012	999.012	999.012	999.012	999.012	999.012	999.012	999.012	999.012	999.012	999.012	999.012	999.012	999.012	999.012	999.012	999.012	999.012	999.012	999.012	999.012	999.012	999.012	999.012	999.012	999.012	999.012	999.012	999.012	999.012	999.012	999.012	999.012	999.012	999.012	999.012	999.012	999.012	999.012	999.012	999.012	999.012	999.012	999.012	999.012	999.012
R0452	0.00159253	0.00159253	0.00159253	0.00159253	0.00159253	0.00159253	0.00159253	0.00159253	0.00159253	0.00159253	0.00159253	0.00159253	0.00159253	0.00159253	0.00159253	0.00159253	0.00137092	0.00159253	0.00159253	0.00159253	0.00137092	0.00159253	0.00159253	0.00159253	0.00159253	0.00159253	0.00159253	0.00159253	0.00159253	0.00145265	0.00159253	0.00159253	0.00159253	0.00159253	0.00159253	0.00159253	0.00159253	0.00159253	0.00159253	0.00159253	0.00159253	0.00159253	0.00159253	0.00159253	0.00159253	0.00159253	0.00159253	0.00159253	0.00159253
R0453	1000	1000	1000	1000	1000	1000	1000	1000	1000	1000	1000	1000	1000	1000	1000	1000	1000	1000	1000	1000	1000	1000	1000	1000	1000	1000	1000	1000	1000	1000	1000	1000	1000	1000	1000	1000	1000	1000	1000	1000	1000	1000	1000	1000	1000	1000	1000	1000	1000
R0454	0.0189426	0.0189426	0.0189426	0.0189426	0.0189426	0.0189426	0.0189426	0.0189426	0.0189426	0.0189426	0.0189426	0.0189426	0.0189426	0.0189426	0.0189426	0.0189426	0.0189426	0.0189426	0.0189426	0.0189426	0.0189426	0.0189426	0.0189426	0.0189426	0.0189426	0.0189426	0.0189426	0.0189426	0.0189426	0.0189426	0.0189426	0.0189426	0.0189426	0.0189426	0.0189426	0.0189426	0.0189426	0.0189426	0.0189426	0.0189426	0.0189426	0.0189426	0.0189426	0.0189426	0.0189426	0.0189426	0.0189426	0.0189426	0.0189426
R0455	0.0189426	0.0189426	0.0189426	0.0189426	0.0189426	0.0189426	0.0189426	0.0189426	0.0189426	0.0189426	0.0189426	0.0189426	0.0189426	0.0189426	0.0189426	0.0189426	0.0189426	0.0189426	0.0189426	0.0189426	0.0189426	0.0189426	0.0189426	0.0189426	0.0189426	0.0189426	0.0189426	0.0189426	0.0189426	0.0189426	0.0189426	0.0189426	0.0189426	0.0189426	0.0189426	0.0189426	0.0189426	0.0189426	0.0189426	0.0189426	0.0189426	0.0189426	0.0189426	0.0189426	0.0189426	0.0189426	0.0189426	0.0189426	0.0189426
R0456	401.304	401.304	401.304	401.304	401.304	401.303	401.304	401.304	401.304	401.304	401.304	401.304	401.304	401.304	401.304	401.304	401.304	401.304	401.304	401.304	401.304	401.085	401.304	401.304	401.304	401.303	401.304	401.304	401.304	401.304	401.303	401.304	401.304	401.304	401.304	401.304	401.304	401.304	401.304	401.304	401.304	401.304	401.304	401.304	401.304	401.304	401.304	401.304	401.304
R0457	401.304	401.304	401.304	401.304	401.304	401.303	401.304	401.304	401.304	401.304	401.304	401.304	401.304	401.304	401.304	401.304	401.304	401.304	401.304	401.304	401.304	401.085	401.304	401.304	401.304	401.303	401.304	401.304	401.304	401.304	401.303	401.304	401.304	401.304	401.304	401.304	401.304	401.304	401.304	401.304	401.304	401.304	401.304	401.304	401.304	401.304	401.304	401.304	401.304
R0458	0	0	0	0	0	0	0	0	0	0	0	0	0	0	0	0	0	0	0	0	0	0	0	0	0	0	0	0	0	0	0	0	0	0	0	0	0	0	0	0	0	0	0	0	0	0	0	0	0
R0459	0.00739481	0.00739481	0.00739481	0.00739481	0.00739482	0.00739482	0.00739482	0.00739481	0.00739481	0.00739481	0.00739482	0.00739481	0.00739482	0.00739482	0.00739481	0.00739481	0.00739481	0.00739481	0.00739482	0.00739481	0.00739481	0.00739481	0.00739482	0.00739481	0.00739482	0.00739482	0.00739481	0.00739482	0.00739481	0.00739482	0.00739482	0.00739481	0.00739481	0.00739482	0.00739481	0.00739481	0.00739481	0.00739481	0.00739482	0.00739482	0.00739481	0.00739481	0.00739481	0.00739481	0.00739481	0.00739481	0.00739482	0.00739482	0.00739481
R0460	0.190402	0.190402	0.190402	0.190402	0.190402	0.190402	0.190402	0.190402	0.190402	0.190402	0.190402	0.190402	0.190402	0.190402	0.190402	0.190402	0.190402	0.190402	0.190402	0.190402	0.190402	0.190402	0.190402	0.190402	0.190402	0.190402	0.190402	0.190402	0.190402	0.190402	0.190402	0.190402	0.190402	0.190402	0.190402	0.190402	0.190402	0.190402	0.190402	0.190402	0.190402	0.190402	0.190402	0.190402	0.190402	0.190402	0.190402	0.190402	0.190402
R0461	0.190402	0.190402	0.190402	0.190402	0.190402	0.190402	0.190402	0.190402	0.190402	0.190402	0.190402	0.190402	0.190402	0.190402	0.190402	0.190402	0.190402	0.190402	0.190402	0.190402	0.190402	0.190402	0.190402	0.190402	0.190402	0.190402	0.190402	0.190402	0.190402	0.190402	0.190402	0.190402	0.190402	0.190402	0.190402	0.190402	0.190402	0.190402	0.190402	0.190402	0.190402	0.190402	0.190402	0.190402	0.190402	0.190402	0.190402	0.190402	0.190402
R0462	0	0	0	0	0	0	0	0	0	0	0	0	0	0	0	0	0	0	0	0	0	0	0	0	0	0	0	0	0	0	0	0	0	0	0	0	0	0	0	0	0	0	0	0	0	0	0	0	0
R0463	0	0	0	0	0	0	0	0	0	0	0	0	0	0	0	0	0	0	0	0	0	0	0	0	0	0	0	0	0	0	0	0	0	0	0	0	0	0	0	0	0	0	0	0	0	0	0	0	0
R0465	0	0	0	0	0	0	0	0	0	0	0	0	0	0	0	0	0	0	0	0	0	0	0	0	0	0	0	0	0	0	0	0	0	0	0	0	0	0	0	0	0	0	0	0	0	0	0	0	0
R0466	0	0	0	0	0	0	0	0	0	0	0	0	0	0	0	0	0	0	0	0	0	0	0	0	0	0	0	0	0	0	0	0	0	0	0	0	0	0	0	0	0	0	0	0	0	0	0	0	0
R0467	0	0	0	0	0	0	0	0	0	0	0	0	0	0	0	0	0	0	0	0	0	0	0	0	0	0	0	0	0	0	0	0	0	0	0	0	0	0	0	0	0	0	0	0	0	0	0	0	0
R0468	-8.46004e-15	-8.46004e-15	-8.46004e-15	-8.46004e-15	9.31451e-15	6.30953e-15	-3.68429e-15	-8.46004e-15	-8.46004e-15	-8.46004e-15	-1.04759e-14	-8.46004e-15	9.31451e-15	-6.06352e-15	-8.46004e-15	-8.46004e-15	1.9261e-14	-8.46004e-15	-1.69958e-14	-8.46004e-15	1.9261e-14	3.94641e-13	-3.52048e-15	-3.17465e-15	-3.63976e-15	-7.3937e-15	4.25418e-13	-6.03764e-15	-8.46004e-15	-8.6636e-15	-7.3937e-15	-8.46004e-15	-8.46004e-15	-6.06352e-15	-8.46004e-15	-8.46004e-15	-8.46004e-15	-8.46004e-15	5.33686e-15	-8.46004e-15	-8.46004e-15	1.62095e-14	0	-8.46004e-15	-8.46004e-15	-8.46004e-15	-6.06352e-15	2.15435e-13	-1.65578e-14
R0469	0.000110161	0.000110161	0.000110161	0.000110161	0.000110161	0.000110161	0.000110161	0.000110161	0.000110161	0.000110161	0.000110161	0.000110161	0.000110161	0.000110161	0.000110161	0.000110161	0.000110161	0.000110161	0.000110161	0.000110161	0.000110161	0.000110161	0.000110161	0.000110161	0.000110161	0.000110161	0.000110161	0.000110161	0.000110161	0.000110161	0.000110161	0.000110161	0.000110161	0.000110161	0.000110161	0.000110161	0.000110161	0.000110161	0.000110161	0.000110161	0.000110161	0.000110161	0	0.000110161	0.000110161	0.000110161	0.000110161	0.000110161	0.000110161
R0470	0.000110161	0.000110161	0.000110161	0.000110161	0.000110161	0.000110161	0.000110161	0.000110161	0.000110161	0.000110161	0.000110161	0.000110161	0.000110161	0.000110161	0.000110161	0.000110161	0.000110161	0.000110161	0.000110161	0.000110161	0.000110161	0.000110161	0.000110161	0.000110161	0.000110161	0.000110161	0.000110161	0.000110161	0.000110161	0.000110161	0.000110161	0.000110161	0.000110161	0.000110161	0.000110161	0.000110161	0.000110161	0.000110161	0.000110161	0.000110161	0.000110161	0.000110161	0	0.000110161	0.000110161	0.000110161	0.000110161	0.000110161	0.000110161
R0471	0.000110161	0.000110161	0.000110161	0.000110161	0.000110161	0.000110161	0.000110161	0.000110161	0.000110161	0.000110161	0.000110161	0.000110161	0.000110161	0.000110161	0.000110161	0.000110161	0.000110161	0.000110161	0.000110161	0.000110161	0.000110161	0.000110161	0.000110161	0.000110161	0.000110161	0.000110161	0.000110161	0.000110161	0.000110161	0.000110161	0.000110161	0.000110161	0.000110161	0.000110161	0.000110161	0.000110161	0.000110161	0.000110161	0.000110161	0.000110161	0.000110161	0.000110161	0	0.000110161	0.000110161	0.000110161	0.000110161	0.000110161	0.000110161
R0472	0	0	0	0	0	0	0	0	0	0	0	0	0	0	0	0	0	0	0	0	0	0	0	0	0	0	0	0	0	0	0	0	0	0	0	0	0	0	0	0	0	0	0	0	0	0	0	0	0
R0473	-8.46004e-15	-8.46004e-15	-8.46004e-15	-8.46004e-15	9.31451e-15	6.30953e-15	-3.68429e-15	-8.46004e-15	-8.46004e-15	-8.46004e-15	-1.04759e-14	-8.46004e-15	9.31451e-15	-6.06352e-15	-8.46004e-15	-8.46004e-15	1.9261e-14	-8.46004e-15	-1.69958e-14	-8.46004e-15	1.9261e-14	3.94641e-13	-3.52048e-15	-3.17465e-15	-3.63976e-15	-7.3937e-15	4.25418e-13	-6.03764e-15	-8.46004e-15	-8.6636e-15	-7.3937e-15	-8.46004e-15	-8.46004e-15	-6.06352e-15	-8.46004e-15	-8.46004e-15	-8.46004e-15	-8.46004e-15	5.33686e-15	-8.46004e-15	-8.46004e-15	1.62095e-14	0	-8.46004e-15	-8.46004e-15	-8.46004e-15	-6.06352e-15	2.15435e-13	-1.65578e-14
R0474	-8.46004e-15	-8.46004e-15	-8.46004e-15	-8.46004e-15	9.31451e-15	6.30953e-15	-3.68429e-15	-8.46004e-15	-8.46004e-15	-8.46004e-15	-1.04759e-14	-8.46004e-15	9.31451e-15	-6.06352e-15	-8.46004e-15	-8.46004e-15	1.9261e-14	-8.46004e-15	-1.69958e-14	-8.46004e-15	1.9261e-14	3.94641e-13	-3.52048e-15	-3.17465e-15	-3.63976e-15	-7.3937e-15	4.25418e-13	-6.03764e-15	-8.46004e-15	-8.6636e-15	-7.3937e-15	-8.46004e-15	-8.46004e-15	-6.06352e-15	-8.46004e-15	-8.46004e-15	-8.46004e-15	-8.46004e-15	5.33686e-15	-8.46004e-15	-8.46004e-15	1.62095e-14	0	-8.46004e-15	-8.46004e-15	-8.46004e-15	-6.06352e-15	2.15435e-13	-1.65578e-14
R0475	-8.46004e-15	-8.46004e-15	-8.46004e-15	-8.46004e-15	9.31451e-15	6.30953e-15	-3.68429e-15	-8.46004e-15	-8.46004e-15	-8.46004e-15	-1.04759e-14	-8.46004e-15	9.31451e-15	-6.06352e-15	-8.46004e-15	-8.46004e-15	1.9261e-14	-8.46004e-15	-1.69958e-14	-8.46004e-15	1.9261e-14	3.94641e-13	-3.52048e-15	-3.17465e-15	-3.63976e-15	-7.3937e-15	4.25418e-13	-6.03764e-15	-8.46004e-15	-8.6636e-15	-7.3937e-15	-8.46004e-15	-8.46004e-15	-6.06352e-15	-8.46004e-15	-8.46004e-15	-8.46004e-15	-8.46004e-15	5.33686e-15	-8.46004e-15	-8.46004e-15	1.62095e-14	0	-8.46004e-15	-8.46004e-15	-8.46004e-15	-6.06352e-15	2.15435e-13	-1.65578e-14
R0476	-8.46004e-15	-8.46004e-15	-8.46004e-15	-8.46004e-15	9.31451e-15	6.30953e-15	-3.68429e-15	-8.46004e-15	-8.46004e-15	-8.46004e-15	-1.04759e-14	-8.46004e-15	9.31451e-15	-6.06352e-15	-8.46004e-15	-8.46004e-15	1.9261e-14	-8.46004e-15	-1.69958e-14	-8.46004e-15	1.9261e-14	3.94641e-13	-3.52048e-15	-3.17465e-15	-3.63976e-15	-7.3937e-15	4.25418e-13	-6.03764e-15	-8.46004e-15	-8.6636e-15	-7.3937e-15	-8.46004e-15	-8.46004e-15	-6.06352e-15	-8.46004e-15	-8.46004e-15	-8.46004e-15	-8.46004e-15	5.33686e-15	-8.46004e-15	-8.46004e-15	1.62095e-14	0	-8.46004e-15	-8.46004e-15	-8.46004e-15	-6.06352e-15	2.15435e-13	-1.65578e-14
R0477	0	0	0	0	0	0	0	0	0	0	0	0	0	0	0	0	0	0	0	0	0	0	0	0	0	0	0	0	0	0	0	0	0	0	0	0	0	0	0	0	0	0	0	0	0	0	0	0	0
R0478	0	0	0	0	0	0	0	0	0	0	0	0	0	0	0	0	0	0	0	0	0	0	0	0	0	0	0	0	0	0	0	0	0	0	0	0	0	0	0	0	0	0	0	0	0	0	0	0	0
R0479	0	0	0	0	0	0	0	0	0	0	0	0	0	0	0	0	0	0	0	0	0	0	0	0	0	0	0	0	0	0	0	0	0	0	0	0	0	0	0	0	0	0	0	0	0	0	0	0	0
R0481	0	0	0	0	0	0	0	0	0	0	0	0	0	0	0	0	0	0	0	0	0	0	0	0	0	0	0	0	0	0	0	0	0	0	0	0	0	0	0	0	0	0	0	0	0	0	0	0	0
R0482	-0.0158523	-0.0158523	-0.0158523	-0.0158523	-0.0158523	-0.0158523	-0.0158523	-0.0158523	-0.0158523	-0.0158523	-0.0158523	-0.0158523	-0.0158523	-0.0158523	-0.0158523	-0.0158523	-0.0158523	-0.0158523	-0.0158523	-0.0158523	-0.0158523	-0.0158523	-0.0158523	-0.0158523	-0.0158523	-0.0158523	-0.0158523	-0.0158523	-0.0158523	-0.0158523	-0.0158523	-0.0158523	-0.0158523	-0.0158523	-0.0158523	-0.0158523	-0.0158523	-0.0158523	-0.0158523	-0.0158523	-0.0158523	-0.0158523	-0.0158523	-0.0158523	-0.0158523	-0.0158523	-0.0158523	-0.0158523	-0.0158523
R0483	55.2846	55.2846	55.2846	55.2846	55.2846	55.2846	55.2846	55.2846	55.2846	55.2846	55.2846	55.2846	55.2846	55.2846	55.2846	55.2846	55.2846	55.2846	55.2846	55.2846	55.2846	55.2846	55.2846	55.2846	55.2846	55.2846	55.2846	55.2846	55.2846	55.2846	55.2846	55.2846	55.2846	55.2846	55.2846	55.2846	55.2846	55.2846	55.2846	55.2846	55.2846	55.2846	55.2846	55.2846	55.2846	55.2846	55.2846	55.2846	55.2846
R0484	36.8406	36.8406	36.8406	36.8406	36.8406	36.8406	36.8406	36.8406	36.8406	36.8406	36.8406	36.8406	36.8406	36.8406	36.8406	36.8406	36.8406	36.8406	36.8406	36.8406	36.8406	36.8406	36.8406	36.8406	36.8406	36.8406	36.8406	36.8406	36.8406	36.8406	36.8406	36.8406	36.8406	36.8406	36.8406	36.8406	36.8406	36.8406	36.8406	36.8406	36.8406	36.8406	36.8406	36.8406	36.8406	36.8406	36.8406	36.8406	36.8406
R0485	0.00204832	0.00204832	0.00204832	0.00204832	0.00204832	0.00204832	0.00204832	0.00204832	0.00204832	0.00204832	0.00204832	0.00204832	0.00204832	0.00204832	0.00204832	0.00204832	0.00204016	0.00204832	0.00204832	0.00204832	0.00204016	0.00204832	0.00204832	0.00204832	0.00204832	0.00204832	0.00204832	0.00204832	0.00204832	0.00204016	0.00204832	0.00204832	0.00204832	0.00204832	0.00204832	0.00204832	0.00204832	0.00204832	0.00204832	0.00204832	0.00204832	0.00204832	0.00204832	0.00204832	0.00204832	0.00204832	0.00204832	0.00204832	0.00204832
R0486	0	0	0	0	0	0	0	0	0	0	0	0	0	0	0	0	0	0	0	0	0	0	0	0	0	0	0	0	0	0	0	0	0	0	0	0	0	0	0	0	0	0	0	0	0	0	0	0	0
R0487	18.4262	18.4262	18.4262	18.4262	18.4262	18.4262	18.4262	18.4262	18.4262	18.4262	18.4262	18.4262	18.4262	18.4262	18.4262	18.4262	18.4262	18.4262	18.4262	18.4262	18.4262	18.4262	18.4262	18.4262	18.4262	18.4262	18.4262	18.4262	18.4262	18.4262	18.4262	18.4262	18.4262	18.4262	18.4262	18.4262	18.4262	18.4262	18.4262	18.4262	18.4262	18.4262	18.4262	18.4262	18.4262	18.4262	18.4262	18.4262	18.4262
R0488	0.0142528	0.0142528	0.0142528	0.0142528	0.0142528	0.0142528	0.0142528	0.0142528	0.0142528	0.0142528	0.0142528	0.0142528	0.0142528	0.0142528	0.0142528	0.0142528	0.0142528	0.0142528	0.0142528	0.0142528	0.0142528	0.0142528	0.0142528	0.0142528	0.0142528	0.0142528	0.0142528	0.0142528	0.0142528	0.0142528	0.0142528	0.0142528	0.0142528	0.0142528	0.0142528	0.0142528	0.0142528	0.0142528	0.0142528	0.0142528	0.0142528	0.0142528	0.0142528	0.0142528	0.0142528	0.0142528	0.0142528	0.0142528	0.0142528
R0489	55.2846	55.2846	55.2846	55.2846	55.2846	55.2846	55.2846	55.2846	55.2846	55.2846	55.2846	55.2846	55.2846	55.2846	55.2846	55.2846	55.2846	55.2846	55.2846	55.2846	55.2846	55.2846	55.2846	55.2846	55.2846	55.2846	55.2846	55.2846	55.2846	55.2846	55.2846	55.2846	55.2846	55.2846	55.2846	55.2846	55.2846	55.2846	55.2846	55.2846	55.2846	55.2846	55.2846	55.2846	55.2846	55.2846	55.2846	55.2846	55.2846
R0490	55.2846	55.2846	55.2846	55.2846	55.2846	55.2846	55.2846	55.2846	55.2846	55.2846	55.2846	55.2846	55.2846	55.2846	55.2846	55.2846	55.2846	55.2846	55.2846	55.2846	55.2846	55.2846	55.2846	55.2846	55.2846	55.2846	55.2846	55.2846	55.2846	55.2846	55.2846	55.2846	55.2846	55.2846	55.2846	55.2846	55.2846	55.2846	55.2846	55.2846	55.2846	55.2846	55.2846	55.2846	55.2846	55.2846	55.2846	55.2846	55.2846
R0492	0.00420767	0.00420767	0.00420767	0.00420767	0.00420768	0.00420768	0.00420768	0.00420767	0.00420767	0.00420767	0.00420768	0.00420767	0.00420768	0.00420768	0.00420767	0.00420767	0.00420767	0.00420767	0.00420768	0.00420767	0.00420767	0.00420767	0.00420768	0.00420767	0.00420768	0.00420768	0.00420767	0.00420768	0.00420767	0.00420768	0.00420768	0.00420767	0.00420767	0.00420768	0.00420767	0.00420767	0.00420767	0.00420767	0.00420768	0.00420768	0.00420767	0.00420767	0.00420767	0.00420767	0.00420767	0.00420767	0.00420768	0.00420768	0.00420767
R0493	0.00107117	0.00107117	0.00107117	0.00107117	0.00107117	0.00107117	0.00107117	0.00107117	0.00107117	0.00107117	0.00107117	0.00107117	0.00107117	0.00107117	0.00107117	0.00107117	0.00107117	0.00107117	0.00107117	0.00107117	0.00107117	0.00107117	0.00107117	0.00107117	0.00107117	0.00107117	0.00107117	0.00107117	0.00107117	0.00107117	0.00107117	0.00107117	0.00107117	0.00107117	0.00107117	0.00107117	0.00107117	0.00107117	0.00107117	0.00107117	0.00107117	0.00107117	0.00107117	0.00107117	0.00107117	0.00107117	0.00107117	0.00107117	0.00107117
R0494	0.00212478	0.00212478	0.00212478	0.00212478	0.00212478	0.00212478	0.00212478	0.00212478	0.00212478	0.00212478	0.00212478	0.00212478	0.00212478	0.00212478	0.00212478	0.00212478	0.00212478	0.00212478	0.00212478	0.00212478	0.00212478	0.00212478	0.00212478	0.00212478	0.00212478	0.00212478	0.00212478	0.00212478	0.00212478	0.00212478	0.00212478	0.00212478	0.00212478	0.00212478	0.00212478	0.00212478	0.00212478	0.00212478	0.00212478	0.00212478	0.00212478	0.00212478	0.00212478	0.00212478	0.00212478	0.00212478	0.00212478	0.00212478	0.00212478
R0495	0	0	0	0	0	0	0	0	0	0	0	0	0	0	0	0	0	0	0	0	0	0	0	0	0	0	0	0	0	0	0	0	0	0	0	0	0	0	0	0	0	0	0	0	0	0	0	0	0
R0496	0.00739481	0.00739481	0.00739481	0.00739481	0.00739482	0.00739482	0.00739482	0.00739481	0.00739481	0.00739481	0.00739482	0.00739481	0.00739482	0.00739482	0.00739481	0.00739481	0.00739481	0.00739481	0.00739482	0.00739481	0.00739481	0.00739481	0.00739482	0.00739481	0.00739482	0.00739482	0.00739481	0.00739482	0.00739481	0.00739482	0.00739482	0.00739481	0.00739481	0.00739482	0.00739481	0.00739481	0.00739481	0.00739481	0.00739482	0.00739482	0.00739481	0.00739481	0.00739481	0.00739481	0.00739481	0.00739481	0.00739482	0.00739482	0.00739481
R0497	0.0115478	0.0115478	0.0115478	0.0115478	0.0115478	0.0115478	0.0115478	0.0115478	0.0115478	0.0115478	0.0115478	0.0115478	0.0115478	0.0115478	0.0115478	0.0115478	0.0115478	0.0115478	0.0115478	0.0115478	0.0115478	0.0115478	0.0115478	0.0115478	0.0115478	0.0115478	0.0115478	0.0115478	0.0115478	0.0115478	0.0115478	0.0115478	0.0115478	0.0115478	0.0115478	0.0115478	0.0115478	0.0115478	0.0115478	0.0115478	0.0115478	0.0115478	0.0115478	0.0115478	0.0115478	0.0115478	0.0115478	0.0115478	0.0115478
R0498	-0.0109969	-0.0109969	-0.0109969	-0.0109969	-0.010997	-0.0109969	-0.010997	-0.0109969	-0.0109969	-0.0109969	-0.0109969	-0.0109969	-0.010997	-0.010997	-0.0109969	-0.0109969	-0.010997	-0.0109969	-0.0109969	-0.0109969	-0.010997	-0.010997	-0.0109969	-0.010997	-0.0109969	-0.0109969	-0.010997	-0.0109969	-0.0109969	-0.0109969	-0.0109969	-0.0109969	-0.0109969	-0.010997	-0.0109969	-0.0109969	-0.0109969	-0.0109969	-0.010997	-0.0109969	-0.0109969	-0.010997	-0.010997	-0.0109969	-0.0109969	-0.0109969	-0.010997	-0.010997	-0.0109969
R0499	575.415	575.415	575.415	575.415	575.415	575.413	575.415	575.415	575.415	575.415	575.415	575.415	575.415	575.415	575.415	575.415	575.415	575.415	575.415	575.415	575.415	575.141	575.415	575.415	575.415	575.413	575.415	575.415	575.415	575.415	575.413	575.415	575.415	575.415	575.415	575.415	575.415	575.415	575.415	575.415	575.415	575.415	575.415	575.415	575.415	575.415	575.415	575.415	575.415
R0500	501.638	501.638	501.638	501.638	501.638	501.636	501.638	501.638	501.638	501.638	501.638	501.638	501.638	501.638	501.638	501.638	501.638	501.638	501.638	501.638	501.638	501.364	501.638	501.638	501.638	501.636	501.638	501.638	501.638	501.638	501.636	501.638	501.638	501.638	501.638	501.638	501.638	501.638	501.638	501.638	501.638	501.638	501.638	501.638	501.638	501.638	501.638	501.638	501.638
R0501	0.00107117	0.00107117	0.00107117	0.00107117	0.00107117	0.00107117	0.00107117	0.00107117	0.00107117	0.00107117	0.00107117	0.00107117	0.00107117	0.00107117	0.00107117	0.00107117	0.00107117	0.00107117	0.00107117	0.00107117	0.00107117	0.00107117	0.00107117	0.00107117	0.00107117	0.00107117	0.00107117	0.00107117	0.00107117	0.00107117	0.00107117	0.00107117	0.00107117	0.00107117	0.00107117	0.00107117	0.00107117	0.00107117	0.00107117	0.00107117	0.00107117	0.00107117	0.00107117	0.00107117	0.00107117	0.00107117	0.00107117	0.00107117	0.00107117
R0502	286.646	286.646	286.646	286.646	286.646	286.645	286.646	286.646	286.646	286.646	286.646	286.646	286.646	286.646	286.646	286.646	286.646	286.646	286.646	286.646	286.646	286.49	286.646	286.646	286.646	286.645	286.646	286.646	286.646	286.646	286.645	286.646	286.646	286.646	286.646	286.646	286.646	286.646	286.646	286.646	286.646	286.646	286.646	286.646	286.646	286.646	286.646	286.646	286.646
R0503	0.000550805	0.000550805	0.000550805	0.000550805	0.000550805	0.000550805	0.000550805	0.000550805	0.000550805	0.000550805	0.000550805	0.000550805	0.000550805	0.000550805	0.000550805	0.000550805	0.000550805	0.000550805	0.000550805	0.000550805	0.000550805	0.000550805	0.000550805	0.000550805	0.000550805	0.000550805	0.000550805	0.000550805	0.000550805	0.000550805	0.000550805	0.000550805	0.000550805	0.000550805	0.000550805	0.000550805	0.000550805	0.000550805	0.000550805	0.000550805	0.000550805	0.000550805	0.000550805	0.000550805	0.000550805	0.000550805	0.000550805	0.000550805	0.000550805
R0504	501.638	501.638	501.638	501.638	501.638	501.636	501.638	501.638	501.638	501.638	501.638	501.638	501.638	501.638	501.638	501.638	501.638	501.638	501.638	501.638	501.638	501.364	501.638	501.638	501.638	501.636	501.638	501.638	501.638	501.638	501.636	501.638	501.638	501.638	501.638	501.638	501.638	501.638	501.638	501.638	501.638	501.638	501.638	501.638	501.638	501.638	501.638	501.638	501.638
R0505	0.000440644	0.000440644	0.000440644	0.000440644	0.000440644	0.000440644	0.000440644	0.000440644	0.000440644	0.000440644	0.000440644	0.000440644	0.000440644	0.000440644	0.000440644	0.000440644	0.000440644	0.000440644	0.000440644	0.000440644	0.000440644	0.000440644	0.000440644	0.000440644	0.000440644	0.000440644	0.000440644	0.000440644	0.000440644	0.000440644	0.000440644	0.000440644	0.000440644	0.000440644	0.000440644	0.000440644	0.000440644	0.000440644	0.000440644	0.000440644	0.000440644	0.000440644	0.000440644	0.000440644	0.000440644	0.000440644	0.000440644	0.000440644	0.000440644
R0506	0.00739481	0.00739481	0.00739481	0.00739481	0.00739482	0.00739482	0.00739482	0.00739481	0.00739481	0.00739481	0.00739482	0.00739481	0.00739482	0.00739482	0.00739481	0.00739481	0.00739481	0.00739481	0.00739482	0.00739481	0.00739481	0.00739481	0.00739482	0.00739481	0.00739482	0.00739482	0.00739481	0.00739482	0.00739481	0.00739482	0.00739482	0.00739481	0.00739481	0.00739482	0.00739481	0.00739481	0.00739481	0.00739481	0.00739482	0.00739482	0.00739481	0.00739481	0.00739481	0.00739481	0.00739481	0.00739481	0.00739482	0.00739482	0.00739481
R0507	575.415	575.415	575.415	575.415	575.415	575.413	575.415	575.415	575.415	575.415	575.415	575.415	575.415	575.415	575.415	575.415	575.415	575.415	575.415	575.415	575.415	575.141	575.415	575.415	575.415	575.413	575.415	575.415	575.415	575.415	575.413	575.415	575.415	575.415	575.415	575.415	575.415	575.415	575.415	575.415	575.415	575.415	575.415	575.415	575.415	575.415	575.415	575.415	575.415
R0508	286.647	286.647	286.647	286.647	286.647	286.646	286.647	286.647	286.647	286.647	286.647	286.647	286.647	286.647	286.647	286.647	286.647	286.647	286.647	286.647	286.647	286.49	286.647	286.647	286.647	286.646	286.647	286.647	286.647	286.647	286.646	286.647	286.647	286.647	286.647	286.647	286.647	286.647	286.647	286.647	286.647	286.647	286.647	286.647	286.647	286.647	286.647	286.647	286.647
R0509	0	0	0	0	0	0	0	0	0	0	0	0	0	0	0	0	0	0	0	0	0	0	0	0	0	0	0	0	0	0	0	0	0	0	0	0	0	0	0	0	0	0	0	0	0	0	0	0	0
R0510	501.824	501.824	501.824	501.824	501.824	501.822	501.824	501.824	501.824	501.824	501.824	501.824	501.824	501.824	501.824	501.824	501.824	501.824	501.824	501.824	501.824	501.55	501.824	501.824	501.824	501.822	501.824	501.824	501.824	501.824	501.822	501.824	501.824	501.824	501.824	501.824	501.824	501.824	501.824	501.824	501.824	501.824	501.824	501.824	501.824	501.824	501.824	501.824	501.824
R0511	575.656	575.656	575.656	575.656	575.656	575.654	575.656	575.656	575.656	575.656	575.656	575.656	575.656	575.656	575.656	575.656	575.656	575.656	575.656	575.656	575.656	575.382	575.656	575.656	575.656	575.654	575.656	575.656	575.656	575.656	575.654	575.656	575.656	575.656	575.656	575.656	575.656	575.656	575.656	575.656	575.656	575.656	575.656	575.656	575.656	575.656	575.656	575.656	575.656
R0512	0	0	0	0	0	4.95536e-35	0	0	0	0	0	0	0	0	0	0	4.95536e-35	0	0	0	4.95536e-35	0	0	0	0	-5.4509e-33	0	0	0	0	-5.4509e-33	0	0	0	0	0	0	0	0	0	0	0	0	0	0	0	0	0	0
R0514	501.64	501.64	501.64	501.64	501.64	501.639	501.64	501.64	501.64	501.64	501.64	501.64	501.64	501.64	501.64	501.64	501.64	501.64	501.64	501.64	501.64	501.366	501.64	501.64	501.64	501.639	501.64	501.64	501.64	501.64	501.639	501.64	501.64	501.64	501.64	501.64	501.64	501.64	501.64	501.64	501.64	501.64	501.64	501.64	501.64	501.64	501.64	501.64	501.64
R0515	501.631	501.631	501.631	501.631	501.631	501.63	501.631	501.631	501.631	501.631	501.631	501.631	501.631	501.631	501.631	501.631	501.631	501.631	501.631	501.631	501.631	501.358	501.631	501.631	501.631	501.63	501.631	501.631	501.631	501.631	501.63	501.631	501.631	501.631	501.631	501.631	501.631	501.631	501.631	501.631	501.631	501.631	501.631	501.631	501.631	501.631	501.631	501.631	501.631
R0516	501.631	501.631	501.631	501.631	501.631	501.63	501.631	501.631	501.631	501.631	501.631	501.631	501.631	501.631	501.631	501.631	501.631	501.631	501.631	501.631	501.631	501.358	501.631	501.631	501.631	501.63	501.631	501.631	501.631	501.631	501.63	501.631	501.631	501.631	501.631	501.631	501.631	501.631	501.631	501.631	501.631	501.631	501.631	501.631	501.631	501.631	501.631	501.631	501.631
R0517	501.631	501.631	501.631	501.631	501.631	501.63	501.631	501.631	501.631	501.631	501.631	501.631	501.631	501.631	501.631	501.631	501.631	501.631	501.631	501.631	501.631	501.358	501.631	501.631	501.631	501.63	501.631	501.631	501.631	501.631	501.63	501.631	501.631	501.631	501.631	501.631	501.631	501.631	501.631	501.631	501.631	501.631	501.631	501.631	501.631	501.631	501.631	501.631	501.631
R0518	0	0	0	0	0	0	0	0	0	0	0	0	0	0	0	0	0	0	0	0	0	0	0	0	0	0	0	0	0	0	0	0	0	0	0	0	0	0	0	0	0	0	0	0	0	0	0	0	0
R0519	501.632	501.632	501.632	501.632	501.632	501.63	501.632	501.632	501.632	501.632	501.632	501.632	501.632	501.632	501.632	501.632	501.632	501.632	501.632	501.632	501.632	501.358	501.632	501.632	501.632	501.63	501.632	501.632	501.632	501.632	501.63	501.632	501.632	501.632	501.632	501.632	501.632	501.632	501.632	501.632	501.632	501.632	501.632	501.632	501.632	501.632	501.632	501.632	501.632
R0520	-0.0010536	-0.0010536	-0.0010536	-0.0010536	-0.0010536	-0.0010536	-0.0010536	-0.0010536	-0.0010536	-0.0010536	-0.0010536	-0.0010536	-0.0010536	-0.0010536	-0.0010536	-0.0010536	-0.0010536	-0.0010536	-0.0010536	-0.0010536	-0.0010536	-0.0010536	-0.0010536	-0.0010536	-0.0010536	-0.0010536	-0.0010536	-0.0010536	-0.0010536	-0.0010536	-0.0010536	-0.0010536	-0.0010536	-0.0010536	-0.0010536	-0.0010536	-0.0010536	-0.0010536	-0.0010536	-0.0010536	-0.0010536	-0.0010536	-0.0010536	-0.0010536	-0.0010536	-0.0010536	-0.0010536	-0.0010536	-0.0010536
R0521	575.433	575.433	575.433	575.433	575.433	575.431	575.433	575.433	575.433	575.433	575.433	575.433	575.433	575.433	575.433	575.433	575.433	575.433	575.433	575.433	575.433	575.159	575.433	575.433	575.433	575.431	575.433	575.433	575.433	575.433	575.431	575.433	575.433	575.433	575.433	575.433	575.433	575.433	575.433	575.433	575.433	575.433	575.433	575.433	575.433	575.433	575.433	575.433	575.433
R0526	501.63	501.63	501.63	501.63	501.63	501.629	501.63	501.63	501.63	501.63	501.63	501.63	501.63	501.63	501.63	501.63	501.63	501.63	501.63	501.63	501.63	501.357	501.63	501.63	501.63	501.629	501.63	501.63	501.63	501.63	501.629	501.63	501.63	501.63	501.63	501.63	501.63	501.63	501.63	501.63	501.63	501.63	501.63	501.63	501.63	501.63	501.63	501.63	501.63
R0527	501.638	501.638	501.638	501.638	501.638	501.636	501.638	501.638	501.638	501.638	501.638	501.638	501.638	501.638	501.638	501.638	501.638	501.638	501.638	501.638	501.638	501.364	501.638	501.638	501.638	501.636	501.638	501.638	501.638	501.638	501.636	501.638	501.638	501.638	501.638	501.638	501.638	501.638	501.638	501.638	501.638	501.638	501.638	501.638	501.638	501.638	501.638	501.638	501.638
R0528	286.646	286.646	286.646	286.646	286.646	286.645	286.646	286.646	286.646	286.646	286.646	286.646	286.646	286.646	286.646	286.646	286.646	286.646	286.646	286.646	286.646	286.49	286.646	286.646	286.646	286.645	286.646	286.646	286.646	286.646	286.645	286.646	286.646	286.646	286.646	286.646	286.646	286.646	286.646	286.646	286.646	286.646	286.646	286.646	286.646	286.646	286.646	286.646	286.646
R0529	0.00107117	0.00107117	0.00107117	0.00107117	0.00107117	0.00107117	0.00107117	0.00107117	0.00107117	0.00107117	0.00107117	0.00107117	0.00107117	0.00107117	0.00107117	0.00107117	0.00107117	0.00107117	0.00107117	0.00107117	0.00107117	0.00107117	0.00107117	0.00107117	0.00107117	0.00107117	0.00107117	0.00107117	0.00107117	0.00107117	0.00107117	0.00107117	0.00107117	0.00107117	0.00107117	0.00107117	0.00107117	0.00107117	0.00107117	0.00107117	0.00107117	0.00107117	0.00107117	0.00107117	0.00107117	0.00107117	0.00107117	0.00107117	0.00107117
R0530	4.95536e-35	4.95536e-35	4.95536e-35	4.95536e-35	-2.47768e-35	0	-9.91073e-35	4.95536e-35	4.95536e-35	4.95536e-35	0	4.95536e-35	-2.47768e-35	-1.4488e-18	4.95536e-35	4.95536e-35	0	4.95536e-35	4.95536e-35	4.95536e-35	0	2.15904e-19	7.92858e-34	-2.2317e-19	1.73438e-34	0	-4.39074e-19	-2.47768e-35	4.95536e-35	0	0	4.95536e-35	4.95536e-35	-1.4488e-18	4.95536e-35	4.95536e-35	4.95536e-35	4.95536e-35	-1.48661e-34	4.95536e-35	4.95536e-35	-2.2317e-19	-2.15904e-19	4.95536e-35	4.95536e-35	4.95536e-35	-1.4488e-18	2.47768e-35	-2.47768e-35
R0531	0.000550805	0.000550805	0.000550805	0.000550805	0.000550805	0.000550805	0.000550805	0.000550805	0.000550805	0.000550805	0.000550805	0.000550805	0.000550805	0.000550805	0.000550805	0.000550805	0.000550805	0.000550805	0.000550805	0.000550805	0.000550805	0.000550805	0.000550805	0.000550805	0.000550805	0.000550805	0.000550805	0.000550805	0.000550805	0.000550805	0.000550805	0.000550805	0.000550805	0.000550805	0.000550805	0.000550805	0.000550805	0.000550805	0.000550805	0.000550805	0.000550805	0.000550805	0.000550805	0.000550805	0.000550805	0.000550805	0.000550805	0.000550805	0.000550805
R0532	286.646	286.646	286.646	286.646	286.646	286.645	286.646	286.646	286.646	286.646	286.646	286.646	286.646	286.646	286.646	286.646	286.646	286.646	286.646	286.646	286.646	286.49	286.646	286.646	286.646	286.645	286.646	286.646	286.646	286.646	286.645	286.646	286.646	286.646	286.646	286.646	286.646	286.646	286.646	286.646	286.646	286.646	286.646	286.646	286.646	286.646	286.646	286.646	286.646
R0533	286.646	286.646	286.646	286.646	286.646	286.645	286.646	286.646	286.646	286.646	286.646	286.646	286.646	286.646	286.646	286.646	286.646	286.646	286.646	286.646	286.646	286.49	286.646	286.646	286.646	286.645	286.646	286.646	286.646	286.646	286.645	286.646	286.646	286.646	286.646	286.646	286.646	286.646	286.646	286.646	286.646	286.646	286.646	286.646	286.646	286.646	286.646	286.646	286.646
R0534	0	0	0	0	0	0	0	0	0	0	0	0	0	0	0	0	0	0	0	0	0	0	0	0	0	0	0	0	0	0	0	0	0	0	0	0	0	0	0	0	0	0	0	0	0	0	0	0	0
R0535	0	0	0	0	0	0	0	0	0	0	0	0	0	0	0	0	0	0	0	0	0	0	0	0	0	0	0	0	0	0	0	0	0	0	0	0	0	0	0	0	0	0	0	0	0	0	0	0	0
R0536	0	0	0	0	0	0	0	0	0	0	0	0	0	0	0	0	0	0	0	0	0	0	0	0	0	0	0	0	0	0	0	0	0	0	0	0	0	0	0	0	0	0	0	0	0	0	0	0	0
R0537	0	0	0	0	0	0	0	0	0	0	0	0	0	0	0	0	0	0	0	0	0	0	0	0	0	0	0	0	0	0	0	0	0	0	0	0	0	0	0	0	0	0	0	0	0	0	0	0	0
R0538	0.000550805	0.000550805	0.000550805	0.000550805	0.000550805	0.000550805	0.000550805	0.000550805	0.000550805	0.000550805	0.000550805	0.000550805	0.000550805	0.000550805	0.000550805	0.000550805	0.000550805	0.000550805	0.000550805	0.000550805	0.000550805	0.000550805	0.000550805	0.000550805	0.000550805	0.000550805	0.000550805	0.000550805	0.000550805	0.000550805	0.000550805	0.000550805	0.000550805	0.000550805	0.000550805	0.000550805	0.000550805	0.000550805	0.000550805	0.000550805	0.000550805	0.000550805	0.000550805	0.000550805	0.000550805	0.000550805	0.000550805	0.000550805	0.000550805
R0539	501.63	501.63	501.63	501.63	501.63	501.629	501.63	501.63	501.63	501.63	501.63	501.63	501.63	501.63	501.63	501.63	501.63	501.63	501.63	501.63	501.63	501.357	501.63	501.63	501.63	501.629	501.63	501.63	501.63	501.63	501.629	501.63	501.63	501.63	501.63	501.63	501.63	501.63	501.63	501.63	501.63	501.63	501.63	501.63	501.63	501.63	501.63	501.63	501.63
R0540	3.21486e-13	3.21486e-13	3.21486e-13	3.21486e-13	0	5.42692e-14	4.31345e-15	3.21486e-13	3.21486e-13	3.21486e-13	4.86105e-13	3.21486e-13	0	-1.74536e-13	3.21486e-13	3.21486e-13	-1.08276e-13	3.21486e-13	4.24737e-14	3.21486e-13	-1.08276e-13	-1.65855e-13	3.97214e-14	-1.1961e-13	2.72052e-13	9.45104e-15	1.35523e-13	7.29246e-14	3.21486e-13	1.16825e-13	9.45104e-15	3.21486e-13	3.21486e-13	-1.74536e-13	3.21486e-13	3.21486e-13	3.21486e-13	3.21486e-13	-4.41914e-14	3.21486e-13	3.21486e-13	-5.59873e-14	-5.87756e-14	3.21486e-13	3.21486e-13	3.21486e-13	-1.74536e-13	8.57174e-15	-5.90124e-15
R0542	509.493	509.493	509.493	509.493	509.493	509.491	509.493	509.493	509.493	509.493	509.493	509.493	509.493	509.493	509.493	509.493	509.493	509.493	509.493	509.493	509.493	509.219	509.493	509.493	509.493	509.491	509.493	509.493	509.493	509.493	509.491	509.493	509.493	509.493	509.493	509.493	509.493	509.493	509.493	509.493	509.493	509.493	509.493	509.493	509.493	509.493	509.493	509.493	509.493
R0543	501.63	501.63	501.63	501.63	501.63	501.629	501.63	501.63	501.63	501.63	501.63	501.63	501.63	501.63	501.63	501.63	501.63	501.63	501.63	501.63	501.63	501.357	501.63	501.63	501.63	501.629	501.63	501.63	501.63	501.63	501.629	501.63	501.63	501.63	501.63	501.63	501.63	501.63	501.63	501.63	501.63	501.63	501.63	501.63	501.63	501.63	501.63	501.63	501.63
R0544	501.63	501.63	501.63	501.63	501.63	501.629	501.63	501.63	501.63	501.63	501.63	501.63	501.63	501.63	501.63	501.63	501.63	501.63	501.63	501.63	501.63	501.357	501.63	501.63	501.63	501.629	501.63	501.63	501.63	501.63	501.629	501.63	501.63	501.63	501.63	501.63	501.63	501.63	501.63	501.63	501.63	501.63	501.63	501.63	501.63	501.63	501.63	501.63	501.63
R0545	501.63	501.63	501.63	501.63	501.63	501.629	501.63	501.63	501.63	501.63	501.63	501.63	501.63	501.63	501.63	501.63	501.63	501.63	501.63	501.63	501.63	501.357	501.63	501.63	501.63	501.629	501.63	501.63	501.63	501.63	501.629	501.63	501.63	501.63	501.63	501.63	501.63	501.63	501.63	501.63	501.63	501.63	501.63	501.63	501.63	501.63	501.63	501.63	501.63
R0546	501.63	501.63	501.63	501.63	501.63	501.629	501.63	501.63	501.63	501.63	501.63	501.63	501.63	501.63	501.63	501.63	501.63	501.63	501.63	501.63	501.63	501.357	501.63	501.63	501.63	501.629	501.63	501.63	501.63	501.63	501.629	501.63	501.63	501.63	501.63	501.63	501.63	501.63	501.63	501.63	501.63	501.63	501.63	501.63	501.63	501.63	501.63	501.63	501.63
R0547	0	0	0	0	0	0	0	0	0	0	-3.20029e-28	0	0	0	0	0	0	0	0	0	0	0	0	0	0	0	0	0	0	0	0	0	0	0	0	0	0	0	0	0	0	0	0	0	0	0	0	0	0
R0548	-0.00684401	-0.00684401	-0.00684401	-0.00684401	-0.00684401	-0.00684401	-0.00684401	-0.00684401	-0.00684401	-0.00684401	-0.00684401	-0.00684401	-0.00684401	-0.00684401	-0.00684401	-0.00684401	-0.00684401	-0.00684401	-0.00684401	-0.00684401	-0.00684401	-0.00684401	-0.00684401	-0.00684401	-0.00684401	-0.00684401	-0.00684401	-0.00684401	-0.00684401	-0.00684401	-0.00684401	-0.00684401	-0.00684401	-0.00684401	-0.00684401	-0.00684401	-0.00684401	-0.00684401	-0.00684401	-0.00684401	-0.00684401	-0.00684401	-0.00684401	-0.00684401	-0.00684401	-0.00684401	-0.00684401	-0.00684401	-0.00684401
R0549	0.00739481	0.00739481	0.00739481	0.00739481	0.00739482	0.00739482	0.00739482	0.00739481	0.00739481	0.00739481	0.00739482	0.00739481	0.00739482	0.00739482	0.00739481	0.00739481	0.00739481	0.00739481	0.00739482	0.00739481	0.00739481	0.00739481	0.00739482	0.00739481	0.00739482	0.00739482	0.00739481	0.00739482	0.00739481	0.00739482	0.00739482	0.00739481	0.00739481	0.00739482	0.00739481	0.00739481	0.00739481	0.00739481	0.00739482	0.00739482	0.00739481	0.00739481	0.00739481	0.00739481	0.00739481	0.00739481	0.00739482	0.00739482	0.00739481
R0550	286.646	286.646	286.646	286.646	286.646	286.645	286.646	286.646	286.646	286.646	286.646	286.646	286.646	286.646	286.646	286.646	286.646	286.646	286.646	286.646	286.646	286.49	286.646	286.646	286.646	286.645	286.646	286.646	286.646	286.646	286.645	286.646	286.646	286.646	286.646	286.646	286.646	286.646	286.646	286.646	286.646	286.646	286.646	286.646	286.646	286.646	286.646	286.646	286.646
R0551	286.646	286.646	286.646	286.646	286.646	286.645	286.646	286.646	286.646	286.646	286.646	286.646	286.646	286.646	286.646	286.646	286.646	286.646	286.646	286.646	286.646	286.49	286.646	286.646	286.646	286.645	286.646	286.646	286.646	286.646	286.645	286.646	286.646	286.646	286.646	286.646	286.646	286.646	286.646	286.646	286.646	286.646	286.646	286.646	286.646	286.646	286.646	286.646	286.646
R0552	575.415	575.415	575.415	575.415	575.415	575.413	575.415	575.415	575.415	575.415	575.415	575.415	575.415	575.415	575.415	575.415	575.415	575.415	575.415	575.415	575.415	575.141	575.415	575.415	575.415	575.413	575.415	575.415	575.415	575.415	575.413	575.415	575.415	575.415	575.415	575.415	575.415	575.415	575.415	575.415	575.415	575.415	575.415	575.415	575.415	575.415	575.415	575.415	575.415
R0553	0.00739481	0.00739481	0.00739481	0.00739481	0.00739482	0.00739482	0.00739482	0.00739481	0.00739481	0.00739481	0.00739482	0.00739481	0.00739482	0.00739482	0.00739481	0.00739481	0.00739481	0.00739481	0.00739482	0.00739481	0.00739481	0.00739481	0.00739482	0.00739481	0.00739482	0.00739482	0.00739481	0.00739482	0.00739481	0.00739482	0.00739482	0.00739481	0.00739481	0.00739482	0.00739481	0.00739481	0.00739481	0.00739481	0.00739482	0.00739482	0.00739481	0.00739481	0.00739481	0.00739481	0.00739481	0.00739481	0.00739482	0.00739482	0.00739481
R0554	0.00739481	0.00739481	0.00739481	0.00739481	0.00739482	0.00739482	0.00739482	0.00739481	0.00739481	0.00739481	0.00739482	0.00739481	0.00739482	0.00739482	0.00739481	0.00739481	0.00739481	0.00739481	0.00739482	0.00739481	0.00739481	0.00739481	0.00739482	0.00739481	0.00739482	0.00739482	0.00739481	0.00739482	0.00739481	0.00739482	0.00739482	0.00739481	0.00739481	0.00739482	0.00739481	0.00739481	0.00739481	0.00739481	0.00739482	0.00739482	0.00739481	0.00739481	0.00739481	0.00739481	0.00739481	0.00739481	0.00739482	0.00739482	0.00739481
R0555	0.00739481	0.00739481	0.00739481	0.00739481	0.00739482	0.00739482	0.00739482	0.00739481	0.00739481	0.00739481	0.00739482	0.00739481	0.00739482	0.00739482	0.00739481	0.00739481	0.00739481	0.00739481	0.00739482	0.00739481	0.00739481	0.00739481	0.00739482	0.00739481	0.00739482	0.00739482	0.00739481	0.00739482	0.00739481	0.00739482	0.00739482	0.00739481	0.00739481	0.00739482	0.00739481	0.00739481	0.00739481	0.00739481	0.00739482	0.00739482	0.00739481	0.00739481	0.00739481	0.00739481	0.00739481	0.00739481	0.00739482	0.00739482	0.00739481
R0556	0.00420767	0.00420767	0.00420767	0.00420767	0.00420768	0.00420768	0.00420768	0.00420767	0.00420767	0.00420767	0.00420768	0.00420767	0.00420768	0.00420767	0.00420767	0.00420767	0.00420767	0.00420767	0.00420768	0.00420767	0.00420767	0.00420767	0.00420768	0.00420767	0.00420768	0.00420768	0.00420767	0.00420768	0.00420767	0.00420768	0.00420768	0.00420767	0.00420767	0.00420767	0.00420767	0.00420767	0.00420767	0.00420767	0.00420768	0.00420768	0.00420767	0.00420767	0.00420767	0.00420767	0.00420767	0.00420767	0.00420767	0.00420767	0.00420767
R0557	0.00739481	0.00739481	0.00739481	0.00739481	0.00739482	0.00739482	0.00739482	0.00739481	0.00739481	0.00739481	0.00739482	0.00739481	0.00739482	0.00739482	0.00739481	0.00739481	0.00739481	0.00739481	0.00739482	0.00739481	0.00739481	0.00739481	0.00739482	0.00739481	0.00739482	0.00739482	0.00739481	0.00739482	0.00739481	0.00739482	0.00739482	0.00739481	0.00739481	0.00739482	0.00739481	0.00739481	0.00739481	0.00739481	0.00739482	0.00739482	0.00739481	0.00739481	0.00739481	0.00739481	0.00739481	0.00739481	0.00739482	0.00739482	0.00739481
R0558	401.31	401.31	401.31	401.31	401.31	401.309	401.31	401.31	401.31	401.31	401.31	401.31	401.31	401.31	401.31	401.31	401.31	401.31	401.31	401.31	401.31	401.091	401.31	401.31	401.31	401.309	401.31	401.31	401.31	401.31	401.309	401.31	401.31	401.31	401.31	401.31	401.31	401.31	401.31	401.31	401.31	401.31	401.31	401.31	401.31	401.31	401.31	401.31	401.31
R0559	401.31	401.31	401.31	401.31	401.31	401.309	401.31	401.31	401.31	401.31	401.31	401.31	401.31	401.31	401.31	401.31	401.31	401.31	401.31	401.31	401.31	401.091	401.31	401.31	401.31	401.309	401.31	401.31	401.31	401.31	401.309	401.31	401.31	401.31	401.31	401.31	401.31	401.31	401.31	401.31	401.31	401.31	401.31	401.31	401.31	401.31	401.31	401.31	401.31
R0561	-0.00642696	-0.00642696	-0.00642696	-0.00642696	-0.00642696	-0.00642696	-0.00642696	-0.00642696	-0.00642696	-0.00642696	-0.00642696	-0.00642696	-0.00642696	-0.00642696	-0.00642696	-0.00642696	-0.00642696	-0.00642696	-0.00642696	-0.00642696	-0.00642696	-0.00642696	-0.00642696	-0.00642696	-0.00642696	-0.00642696	-0.00642696	-0.00642696	-0.00642696	-0.00642696	-0.00642696	-0.00642696	-0.00642696	-0.00642696	-0.00642696	-0.00642696	-0.00642696	-0.00642696	-0.00642696	-0.00642696	-0.00642696	-0.00642696	-0.00642696	-0.00642696	-0.00642696	-0.00642696	-0.00642696	-0.00642696	-0.00642696
R0562	-0.00415294	-0.00415294	-0.00415294	-0.00415294	-0.00415294	-0.00415294	-0.00415294	-0.00415294	-0.00415294	-0.00415294	-0.00415294	-0.00415294	-0.00415294	-0.00415294	-0.00415294	-0.00415294	-0.00415294	-0.00415294	-0.00415294	-0.00415294	-0.00415294	-0.00415294	-0.00415294	-0.00415294	-0.00415294	-0.00415294	-0.00415294	-0.00415294	-0.00415294	-0.00415294	-0.00415294	-0.00415294	-0.00415294	-0.00415294	-0.00415294	-0.00415294	-0.00415294	-0.00415294	-0.00415294	-0.00415294	-0.00415294	-0.00415294	-0.00415294	-0.00415294	-0.00415294	-0.00415294	-0.00415294	-0.00415294	-0.00415294
R0563	0.0014391	0.0014391	0.0014391	0.0014391	0.0014391	0.0014391	0.0014391	0.0014391	0.0014391	0.0014391	0.0014391	0.0014391	0.0014391	0.0014391	0.0014391	0.0014391	0.0014391	0.0014391	0.0014391	0.0014391	0.0014391	0.0014391	0.0014391	0.0014391	0.0014391	0.0014391	0.0014391	0.0014391	0.0014391	0.0014391	0.0014391	0.0014391	0.0014391	0.0014391	0.0014391	0.0014391	0.0014391	0.0014391	0.0014391	0.0014391	0.0014391	0.0014391	0.0014391	0.0014391	0.0014391	0.0014391	0.0014391	0.0014391	0.0014391
R0564	-0.00133895	-0.00133895	-0.00133895	-0.00133895	-0.00133895	-0.00133895	-0.00133895	-0.00133895	-0.00133895	-0.00133895	-0.00133895	-0.00133895	-0.00133895	-0.00133895	-0.00133895	-0.00133895	-0.00133895	-0.00133895	-0.00133895	-0.00133895	-0.00133895	-0.00133895	-0.00133895	-0.00133895	-0.00133895	-0.00133895	-0.00133895	-0.00133895	-0.00133895	-0.00133895	-0.00133895	-0.00133895	-0.00133895	-0.00133895	-0.00133895	-0.00133895	-0.00133895	-0.00133895	-0.00133895	-0.00133895	-0.00133895	-0.00133895	-0.00133895	-0.00133895	-0.00133895	-0.00133895	-0.00133895	-0.00133895	-0.00133895
R0565	0.00653712	0.00653712	0.00653712	0.00653712	0.00653712	0.00653712	0.00653712	0.00653712	0.00653712	0.00653712	0.00653712	0.00653712	0.00653712	0.00653712	0.00653712	0.00653712	0.00653712	0.00653712	0.00653712	0.00653712	0.00653712	0.00653712	0.00653712	0.00653712	0.00653712	0.00653712	0.00653712	0.00653712	0.00653712	0.00653712	0.00653712	0.00653712	0.00653712	0.00653712	0.00653712	0.00653712	0.00653712	0.00653712	0.00653712	0.00653712	0.00653712	0.00653712	0.00653712	0.00653712	0.00653712	0.00653712	0.00653712	0.00653712	0.00653712
R0566	0.0124697	0.0124697	0.0124697	0.0124697	0.0124697	0.0124697	0.0124697	0.0124697	0.0124697	0.0124697	0.0124697	0.0124697	0.0124697	0.0124697	0.0124697	0.0124697	0.0124697	0.0124697	0.0124697	0.0124697	0.0124697	0.0124697	0.0124697	0.0124697	0.0124697	0.0124697	0.0124697	0.0124697	0.0124697	0.0124697	0.0124697	0.0124697	0.0124697	0.0124697	0.0124697	0.0124697	0.0124697	0.0124697	0.0124697	0.0124697	0.0124697	0.0124697	0.0124697	0.0124697	0.0124697	0.0124697	0.0124697	0.0124697	0.0124697
R0567	0.0111307	0.0111307	0.0111307	0.0111307	0.0111307	0.0111307	0.0111307	0.0111307	0.0111307	0.0111307	0.0111307	0.0111307	0.0111307	0.0111307	0.0111307	0.0111307	0.0111307	0.0111307	0.0111307	0.0111307	0.0111307	0.0111307	0.0111307	0.0111307	0.0111307	0.0111307	0.0111307	0.0111307	0.0111307	0.0111307	0.0111307	0.0111307	0.0111307	0.0111307	0.0111307	0.0111307	0.0111307	0.0111307	0.0111307	0.0111307	0.0111307	0.0111307	0.0111307	0.0111307	0.0111307	0.0111307	0.0111307	0.0111307	0.0111307
R0568	0.00470375	0.00470375	0.00470375	0.00470375	0.00470375	0.00470375	0.00470374	0.00470375	0.00470375	0.00470375	0.00470375	0.00470375	0.00470375	0.00470375	0.00470375	0.00470375	0.00470374	0.00470375	0.00470375	0.00470375	0.00470374	0.00470374	0.00470375	0.00470375	0.00470375	0.00470375	0.00470374	0.00470375	0.00470375	0.00470375	0.00470375	0.00470375	0.00470375	0.00470375	0.00470375	0.00470375	0.00470375	0.00470375	0.00470375	0.00470375	0.00470375	0.00470374	0.00470374	0.00470375	0.00470375	0.00470375	0.00470375	0.00470375	0.00470374
R0569	0.0124697	0.0124697	0.0124697	0.0124697	0.0124697	0.0124697	0.0124697	0.0124697	0.0124697	0.0124697	0.0124697	0.0124697	0.0124697	0.0124697	0.0124697	0.0124697	0.0124697	0.0124697	0.0124697	0.0124697	0.0124697	0.0124697	0.0124697	0.0124697	0.0124697	0.0124697	0.0124697	0.0124697	0.0124697	0.0124697	0.0124697	0.0124697	0.0124697	0.0124697	0.0124697	0.0124697	0.0124697	0.0124697	0.0124697	0.0124697	0.0124697	0.0124697	0.0124697	0.0124697	0.0124697	0.0124697	0.0124697	0.0124697	0.0124697
R0570	0.0124697	0.0124697	0.0124697	0.0124697	0.0124697	0.0124697	0.0124697	0.0124697	0.0124697	0.0124697	0.0124697	0.0124697	0.0124697	0.0124697	0.0124697	0.0124697	0.0124697	0.0124697	0.0124697	0.0124697	0.0124697	0.0124697	0.0124697	0.0124697	0.0124697	0.0124697	0.0124697	0.0124697	0.0124697	0.0124697	0.0124697	0.0124697	0.0124697	0.0124697	0.0124697	0.0124697	0.0124697	0.0124697	0.0124697	0.0124697	0.0124697	0.0124697	0.0124697	0.0124697	0.0124697	0.0124697	0.0124697	0.0124697	0.0124697
R0571	0.0124697	0.0124697	0.0124697	0.0124697	0.0124697	0.0124697	0.0124697	0.0124697	0.0124697	0.0124697	0.0124697	0.0124697	0.0124697	0.0124697	0.0124697	0.0124697	0.0124697	0.0124697	0.0124697	0.0124697	0.0124697	0.0124697	0.0124697	0.0124697	0.0124697	0.0124697	0.0124697	0.0124697	0.0124697	0.0124697	0.0124697	0.0124697	0.0124697	0.0124697	0.0124697	0.0124697	0.0124697	0.0124697	0.0124697	0.0124697	0.0124697	0.0124697	0.0124697	0.0124697	0.0124697	0.0124697	0.0124697	0.0124697	0.0124697
R0572	0.0124697	0.0124697	0.0124697	0.0124697	0.0124697	0.0124697	0.0124697	0.0124697	0.0124697	0.0124697	0.0124697	0.0124697	0.0124697	0.0124697	0.0124697	0.0124697	0.0124697	0.0124697	0.0124697	0.0124697	0.0124697	0.0124697	0.0124697	0.0124697	0.0124697	0.0124697	0.0124697	0.0124697	0.0124697	0.0124697	0.0124697	0.0124697	0.0124697	0.0124697	0.0124697	0.0124697	0.0124697	0.0124697	0.0124697	0.0124697	0.0124697	0.0124697	0.0124697	0.0124697	0.0124697	0.0124697	0.0124697	0.0124697	0.0124697
R0573	0.0124697	0.0124697	0.0124697	0.0124697	0.0124697	0.0124697	0.0124697	0.0124697	0.0124697	0.0124697	0.0124697	0.0124697	0.0124697	0.0124697	0.0124697	0.0124697	0.0124697	0.0124697	0.0124697	0.0124697	0.0124697	0.0124697	0.0124697	0.0124697	0.0124697	0.0124697	0.0124697	0.0124697	0.0124697	0.0124697	0.0124697	0.0124697	0.0124697	0.0124697	0.0124697	0.0124697	0.0124697	0.0124697	0.0124697	0.0124697	0.0124697	0.0124697	0.0124697	0.0124697	0.0124697	0.0124697	0.0124697	0.0124697	0.0124697
R0574	0.0124697	0.0124697	0.0124697	0.0124697	0.0124697	0.0124697	0.0124697	0.0124697	0.0124697	0.0124697	0.0124697	0.0124697	0.0124697	0.0124697	0.0124697	0.0124697	0.0124697	0.0124697	0.0124697	0.0124697	0.0124697	0.0124697	0.0124697	0.0124697	0.0124697	0.0124697	0.0124697	0.0124697	0.0124697	0.0124697	0.0124697	0.0124697	0.0124697	0.0124697	0.0124697	0.0124697	0.0124697	0.0124697	0.0124697	0.0124697	0.0124697	0.0124697	0.0124697	0.0124697	0.0124697	0.0124697	0.0124697	0.0124697	0.0124697
R0575	0.0014391	0.0014391	0.0014391	0.0014391	0.0014391	0.0014391	0.0014391	0.0014391	0.0014391	0.0014391	0.0014391	0.0014391	0.0014391	0.0014391	0.0014391	0.0014391	0.0014391	0.0014391	0.0014391	0.0014391	0.0014391	0.0014391	0.0014391	0.0014391	0.0014391	0.0014391	0.0014391	0.0014391	0.0014391	0.0014391	0.0014391	0.0014391	0.0014391	0.0014391	0.0014391	0.0014391	0.0014391	0.0014391	0.0014391	0.0014391	0.0014391	0.0014391	0.0014391	0.0014391	0.0014391	0.0014391	0.0014391	0.0014391	0.0014391
R0576	0.0014391	0.0014391	0.0014391	0.0014391	0.0014391	0.0014391	0.0014391	0.0014391	0.0014391	0.0014391	0.0014391	0.0014391	0.0014391	0.0014391	0.0014391	0.0014391	0.0014391	0.0014391	0.0014391	0.0014391	0.0014391	0.0014391	0.0014391	0.0014391	0.0014391	0.0014391	0.0014391	0.0014391	0.0014391	0.0014391	0.0014391	0.0014391	0.0014391	0.0014391	0.0014391	0.0014391	0.0014391	0.0014391	0.0014391	0.0014391	0.0014391	0.0014391	0.0014391	0.0014391	0.0014391	0.0014391	0.0014391	0.0014391	0.0014391
R0577	0	0	0	0	0	0	0	0	0	0	0	0	0	0	0	0	0	0	0	0	0	0	0	0	0	0	0	0	0	0	0	0	0	0	0	0	0	0	0	0	0	0	0	0	0	0	0	0	0
R0578	0	0	0	0	0	0	0	0	0	0	0	0	0	0	0	0	0	0	0	0	0	0	0	0	0	0	0	0	0	0	0	0	0	0	0	0	0	0	0	0	0	0	0	0	0	0	0	0	0
R0579	0	0	0	0	0	0	0	0	0	0	0	0	0	0	0	0	0	0	0	0	0	0	0	0	0	0	0	0	0	0	0	0	0	0	0	0	0	0	0	0	0	0	0	0	0	0	0	0	0
R0581	0	0	0	0	0	0	0	0	0	0	0	0	0	0	0	0	0	0	0	0	0	0	0	0	0	0	0	0	0	0	0	0	0	0	0	0	0	0	0	0	0	0	0	0	0	0	0	0	0
R0582	0	0	0	0	0	0	0	0	0	0	0	0	0	0	0	0	0	0	0	0	0	0	0	0	0	0	0	0	0	0	0	0	0	0	0	0	0	0	0	0	0	0	0	0	0	0	0	0	0
R0583	0	0	0	0	0	0	0	0	0	0	0	0	0	0	0	0	0	0	0	0	0	0	0	0	0	0	0	0	0	0	0	0	0	0	0	0	0	0	0	0	0	0	0	0	0	0	0	0	0
R0584	0	0	0	0	0	0	0	0	0	0	0	0	0	0	0	0	0	0	0	0	0	0	0	0	0	0	0	0	0	0	0	0	0	0	0	0	0	0	0	0	0	0	0	0	0	0	0	0	0
R0585	0	0	0	0	0	0	0	0	0	0	0	0	0	0	0	0	0	0	0	0	0	0	0	0	0	0	0	0	0	0	0	0	0	0	0	0	0	0	0	0	0	0	0	0	0	0	0	0	0
R0586	0	0	0	0	0	0	0	0	0	0	0	0	0	0	0	0	0	0	0	0	0	0	0	0	0	0	0	0	0	0	0	0	0	0	0	0	0	0	0	0	0	0	0	0	0	0	0	0	0
R0588	0	0	0	0	0	0	0	0	0	0	0	0	0	0	0	0	0	0	0	0	0	0	0	0	0	0	0	0	0	0	0	0	0	0	0	0	0	0	0	0	0	0	0	0	0	0	0	0	0
R0592	0	0	0	0	0	0	0	0	0	0	0	0	0	0	0	0	0	0	0	0	0	0	0	0	0	0	0	0	0	0	0	0	0	0	0	0	0	0	0	0	0	0	0	0	0	0	0	0	0
R0593	36.8564	36.8564	36.8564	36.8564	36.8564	36.8564	36.8564	36.8564	36.8564	36.8564	36.8564	36.8564	36.8564	36.8564	36.8564	36.8564	36.8564	36.8564	36.8564	36.8564	36.8564	36.8564	36.8564	36.8564	36.8564	36.8564	36.8564	36.8564	36.8564	36.8564	36.8564	36.8564	36.8564	36.8564	36.8564	36.8564	36.8564	36.8564	36.8564	36.8564	36.8564	36.8564	36.8564	36.8564	36.8564	36.8564	36.8564	36.8564	36.8564
R0594	0	0	0	0	0	0	0	0	0	0	0	0	0	0	0	0	0	0	0	0	0	0	0	0	0	0	0	0	0	0	0	0	0	0	0	0	0	0	0	0	0	0	0	0	0	0	0	0	0
R0595	0	0	0	0	0	0	4.49501e-29	0	0	0	0	0	0	0	0	0	0	0	0	0	0	0	0	0	0	0	0	0	0	0	0	0	0	0	0	0	0	0	0	0	0	0	0	0	0	0	0	0	0
R0596	0	0	0	0	0	0	0	0	0	0	0	0	0	0	0	0	0	0	0	0	0	0	0	0	0	0	0	0	0	0	0	0	0	0	0	0	0	0	0	0	0	0	0	0	0	0	0	0	0
R0597	501.63	501.63	501.63	501.63	501.63	501.629	501.63	501.63	501.63	501.63	501.63	501.63	501.63	501.63	501.63	501.63	501.63	501.63	501.63	501.63	501.63	501.357	501.63	501.63	501.63	501.629	501.63	501.63	501.63	501.63	501.629	501.63	501.63	501.63	501.63	501.63	501.63	501.63	501.63	501.63	501.63	501.63	501.63	501.63	501.63	501.63	501.63	501.63	501.63
R0598	36.8564	36.8564	36.8564	36.8564	36.8564	36.8564	36.8564	36.8564	36.8564	36.8564	36.8564	36.8564	36.8564	36.8564	36.8564	36.8564	36.8564	36.8564	36.8564	36.8564	36.8564	36.8564	36.8564	36.8564	36.8564	36.8564	36.8564	36.8564	36.8564	36.8564	36.8564	36.8564	36.8564	36.8564	36.8564	36.8564	36.8564	36.8564	36.8564	36.8564	36.8564	36.8564	36.8564	36.8564	36.8564	36.8564	36.8564	36.8564	36.8564
R0606	0.00328066	0.00328066	0.00328066	0.00328066	0.00328066	0.00328066	0.00328066	0.00328066	0.00328066	0.00328066	0.00328066	0.00328066	0.00328066	0.00328066	0.00328066	0.00328066	0.00328066	0.00328066	0.00328066	0.00328066	0.00328066	0.00328066	0.00328066	0.00328066	0.00328066	0.00328066	0.00328066	0.00328066	0.00328066	0.00328066	0.00328066	0.00328066	0.00328066	0.00328066	0.00328066	0.00328066	0.00328066	0.00328066	0.00328066	0.00328066	0.00328066	0.00328066	0.00328066	0.00328066	0.00328066	0.00328066	0.00328066	0.00328066	0.00328066
R0607	0.00328066	0.00328066	0.00328066	0.00328066	0.00328066	0.00328066	0.00328066	0.00328066	0.00328066	0.00328066	0.00328066	0.00328066	0.00328066	0.00328066	0.00328066	0.00328066	0.00328066	0.00328066	0.00328066	0.00328066	0.00328066	0.00328066	0.00328066	0.00328066	0.00328066	0.00328066	0.00328066	0.00328066	0.00328066	0.00328066	0.00328066	0.00328066	0.00328066	0.00328066	0.00328066	0.00328066	0.00328066	0.00328066	0.00328066	0.00328066	0.00328066	0.00328066	0.00328066	0.00328066	0.00328066	0.00328066	0.00328066	0.00328066	0.00328066
R0608	0.00556785	0.00556785	0.00556785	0.00556785	0.00556785	0.00556785	0.00556785	0.00556785	0.00556785	0.00556785	0.00556785	0.00556785	0.00556785	0.00556785	0.00556785	0.00556785	0.00556785	0.00556785	0.00556785	0.00556785	0.00556785	0.00556785	0.00556785	0.00556785	0.00556785	0.00556785	0.00556785	0.00556785	0.00556785	0.00556785	0.00556785	0.00556785	0.00556785	0.00556785	0.00556785	0.00556785	0.00556785	0.00556785	0.00556785	0.00556785	0.00556785	0.00556785	0.00556785	0.00556785	0.00556785	0.00556785	0.00556785	0.00556785	0.00556785
R0609	270.537	270.537	270.537	270.537	270.537	270.536	270.537	270.537	270.537	270.537	270.537	270.537	270.537	270.537	270.537	270.537	270.537	270.537	270.537	270.537	270.537	270.4	270.537	270.537	270.537	270.536	270.537	270.537	270.537	270.537	270.536	270.537	270.537	270.537	270.537	270.537	270.537	270.537	270.537	270.537	270.537	270.537	270.537	270.537	270.537	270.537	270.537	270.537	270.537
R0610	0.0011559	0.0011559	0.0011559	0.0011559	0.0011559	0.0011559	0.0011559	0.0011559	0.0011559	0.0011559	0.0011559	0.0011559	0.0011559	0.0011559	0.0011559	0.0011559	0.0011559	0.0011559	0.0011559	0.0011559	0.0011559	0.0011559	0.0011559	0.0011559	0.0011559	0.0011559	0.0011559	0.0011559	0.0011559	0.0011559	0.0011559	0.0011559	0.0011559	0.0011559	0.0011559	0.0011559	0.0011559	0.0011559	0.0011559	0.0011559	0.0011559	0.0011559	0.0011559	0.0011559	0.0011559	0.0011559	0.0011559	0.0011559	0.0011559
R0611	0.00556785	0.00556785	0.00556785	0.00556785	0.00556785	0.00556785	0.00556785	0.00556785	0.00556785	0.00556785	0.00556785	0.00556785	0.00556785	0.00556785	0.00556785	0.00556785	0.00556785	0.00556785	0.00556785	0.00556785	0.00556785	0.00556785	0.00556785	0.00556785	0.00556785	0.00556785	0.00556785	0.00556785	0.00556785	0.00556785	0.00556785	0.00556785	0.00556785	0.00556785	0.00556785	0.00556785	0.00556785	0.00556785	0.00556785	0.00556785	0.00556785	0.00556785	0.00556785	0.00556785	0.00556785	0.00556785	0.00556785	0.00556785	0.00556785
R0612	0.00107117	0.00107117	0.00107117	0.00107117	0.00107117	0.00107117	0.00107117	0.00107117	0.00107117	0.00107117	0.00107117	0.00107117	0.00107117	0.00107117	0.00107117	0.00107117	0.00107117	0.00107117	0.00107117	0.00107117	0.00107117	0.00107117	0.00107117	0.00107117	0.00107117	0.00107117	0.00107117	0.00107117	0.00107117	0.00107117	0.00107117	0.00107117	0.00107117	0.00107117	0.00107117	0.00107117	0.00107117	0.00107117	0.00107117	0.00107117	0.00107117	0.00107117	0.00107117	0.00107117	0.00107117	0.00107117	0.00107117	0.00107117	0.00107117
R0613	-0.00548311	-0.00548311	-0.00548311	-0.00548311	-0.00548311	-0.00548311	-0.00548311	-0.00548311	-0.00548311	-0.00548311	-0.00548311	-0.00548311	-0.00548311	-0.00548311	-0.00548311	-0.00548311	-0.00548311	-0.00548311	-0.00548311	-0.00548311	-0.00548311	-0.00548311	-0.00548311	-0.00548311	-0.00548311	-0.00548311	-0.00548311	-0.00548311	-0.00548311	-0.00548311	-0.00548311	-0.00548311	-0.00548311	-0.00548311	-0.00548311	-0.00548311	-0.00548311	-0.00548311	-0.00548311	-0.00548311	-0.00548311	-0.00548311	-0.00548311	-0.00548311	-0.00548311	-0.00548311	-0.00548311	-0.00548311	-0.00548311
R0614	286.647	286.647	286.647	286.647	286.647	286.646	286.647	286.647	286.647	286.647	286.647	286.647	286.647	286.647	286.647	286.647	286.647	286.647	286.647	286.647	286.647	286.49	286.647	286.647	286.647	286.646	286.647	286.647	286.647	286.647	286.646	286.647	286.647	286.647	286.647	286.647	286.647	286.647	286.647	286.647	286.647	286.647	286.647	286.647	286.647	286.647	286.647	286.647	286.647
R0615	501.63	501.63	501.63	501.63	501.63	501.629	501.63	501.63	501.63	501.63	501.63	501.63	501.63	501.63	501.63	501.63	501.63	501.63	501.63	501.63	501.63	501.357	501.63	501.63	501.63	501.629	501.63	501.63	501.63	501.63	501.629	501.63	501.63	501.63	501.63	501.63	501.63	501.63	501.63	501.63	501.63	501.63	501.63	501.63	501.63	501.63	501.63	501.63	501.63
R0616	501.63	501.63	501.63	501.63	501.63	501.629	501.63	501.63	501.63	501.63	501.63	501.63	501.63	501.63	501.63	501.63	501.63	501.63	501.63	501.63	501.63	501.357	501.63	501.63	501.63	501.629	501.63	501.63	501.63	501.63	501.629	501.63	501.63	501.63	501.63	501.63	501.63	501.63	501.63	501.63	501.63	501.63	501.63	501.63	501.63	501.63	501.63	501.63	501.63
R0617	501.63	501.63	501.63	501.63	501.63	501.629	501.63	501.63	501.63	501.63	501.63	501.63	501.63	501.63	501.63	501.63	501.63	501.63	501.63	501.63	501.63	501.357	501.63	501.63	501.63	501.629	501.63	501.63	501.63	501.63	501.629	501.63	501.63	501.63	501.63	501.63	501.63	501.63	501.63	501.63	501.63	501.63	501.63	501.63	501.63	501.63	501.63	501.63	501.63
R0618	501.63	501.63	501.63	501.63	501.63	501.629	501.63	501.63	501.63	501.63	501.63	501.63	501.63	501.63	501.63	501.63	501.63	501.63	501.63	501.63	501.63	501.357	501.63	501.63	501.63	501.629	501.63	501.63	501.63	501.63	501.629	501.63	501.63	501.63	501.63	501.63	501.63	501.63	501.63	501.63	501.63	501.63	501.63	501.63	501.63	501.63	501.63	501.63	501.63
R0619	501.631	501.631	501.631	501.631	501.631	501.63	501.631	501.631	501.631	501.631	501.631	501.631	501.631	501.631	501.631	501.631	501.631	501.631	501.631	501.631	501.631	501.358	501.631	501.631	501.631	501.63	501.631	501.631	501.631	501.631	501.63	501.631	501.631	501.631	501.631	501.631	501.631	501.631	501.631	501.631	501.631	501.631	501.631	501.631	501.631	501.631	501.631	501.631	501.631
R0620	501.631	501.631	501.631	501.631	501.631	501.63	501.631	501.631	501.631	501.631	501.631	501.631	501.631	501.631	501.631	501.631	501.631	501.631	501.631	501.631	501.631	501.358	501.631	501.631	501.631	501.63	501.631	501.631	501.631	501.631	501.63	501.631	501.631	501.631	501.631	501.631	501.631	501.631	501.631	501.631	501.631	501.631	501.631	501.631	501.631	501.631	501.631	501.631	501.631
R0621	501.631	501.631	501.631	501.631	501.631	501.63	501.631	501.631	501.631	501.631	501.631	501.631	501.631	501.631	501.631	501.631	501.631	501.631	501.631	501.631	501.631	501.358	501.631	501.631	501.631	501.63	501.631	501.631	501.631	501.631	501.63	501.631	501.631	501.631	501.631	501.631	501.631	501.631	501.631	501.631	501.631	501.631	501.631	501.631	501.631	501.631	501.631	501.631	501.631
R0622	501.631	501.631	501.631	501.631	501.631	501.63	501.631	501.631	501.631	501.631	501.631	501.631	501.631	501.631	501.631	501.631	501.631	501.631	501.631	501.631	501.631	501.358	501.631	501.631	501.631	501.63	501.631	501.631	501.631	501.631	501.63	501.631	501.631	501.631	501.631	501.631	501.631	501.631	501.631	501.631	501.631	501.631	501.631	501.631	501.631	501.631	501.631	501.631	501.631
R0623	501.63	501.63	501.63	501.63	501.63	501.629	501.63	501.63	501.63	501.63	501.63	501.63	501.63	501.63	501.63	501.63	501.63	501.63	501.63	501.63	501.63	501.357	501.63	501.63	501.63	501.629	501.63	501.63	501.63	501.63	501.629	501.63	501.63	501.63	501.63	501.63	501.63	501.63	501.63	501.63	501.63	501.63	501.63	501.63	501.63	501.63	501.63	501.63	501.63
R0624	501.631	501.631	501.631	501.631	501.631	501.63	501.631	501.631	501.631	501.631	501.631	501.631	501.631	501.631	501.631	501.631	501.631	501.631	501.631	501.631	501.631	501.358	501.631	501.631	501.631	501.63	501.631	501.631	501.631	501.631	501.63	501.631	501.631	501.631	501.631	501.631	501.631	501.631	501.631	501.631	501.631	501.631	501.631	501.631	501.631	501.631	501.631	501.631	501.631
R0625	501.631	501.631	501.631	501.631	501.631	501.63	501.631	501.631	501.631	501.631	501.631	501.631	501.631	501.631	501.631	501.631	501.631	501.631	501.631	501.631	501.631	501.358	501.631	501.631	501.631	501.63	501.631	501.631	501.631	501.631	501.63	501.631	501.631	501.631	501.631	501.631	501.631	501.631	501.631	501.631	501.631	501.631	501.631	501.631	501.631	501.631	501.631	501.631	501.631
R0626	501.63	501.63	501.63	501.63	501.63	501.629	501.63	501.63	501.63	501.63	501.63	501.63	501.63	501.63	501.63	501.63	501.63	501.63	501.63	501.63	501.63	501.357	501.63	501.63	501.63	501.629	501.63	501.63	501.63	501.63	501.629	501.63	501.63	501.63	501.63	501.63	501.63	501.63	501.63	501.63	501.63	501.63	501.63	501.63	501.63	501.63	501.63	501.63	501.63
R0627	501.63	501.63	501.63	501.63	501.63	501.629	501.63	501.63	501.63	501.63	501.63	501.63	501.63	501.63	501.63	501.63	501.63	501.63	501.63	501.63	501.63	501.357	501.63	501.63	501.63	501.629	501.63	501.63	501.63	501.63	501.629	501.63	501.63	501.63	501.63	501.63	501.63	501.63	501.63	501.63	501.63	501.63	501.63	501.63	501.63	501.63	501.63	501.63	501.63
R0628	501.631	501.631	501.631	501.631	501.631	501.63	501.631	501.631	501.631	501.631	501.631	501.631	501.631	501.631	501.631	501.631	501.631	501.631	501.631	501.631	501.631	501.358	501.631	501.631	501.631	501.63	501.631	501.631	501.631	501.631	501.63	501.631	501.631	501.631	501.631	501.631	501.631	501.631	501.631	501.631	501.631	501.631	501.631	501.631	501.631	501.631	501.631	501.631	501.631
R0629	501.631	501.631	501.631	501.631	501.631	501.63	501.631	501.631	501.631	501.631	501.631	501.631	501.631	501.631	501.631	501.631	501.631	501.631	501.631	501.631	501.631	501.358	501.631	501.631	501.631	501.63	501.631	501.631	501.631	501.631	501.63	501.631	501.631	501.631	501.631	501.631	501.631	501.631	501.631	501.631	501.631	501.631	501.631	501.631	501.631	501.631	501.631	501.631	501.631
R0630	501.631	501.631	501.631	501.631	501.631	501.63	501.631	501.631	501.631	501.631	501.631	501.631	501.631	501.631	501.631	501.631	501.631	501.631	501.631	501.631	501.631	501.358	501.631	501.631	501.631	501.63	501.631	501.631	501.631	501.631	501.63	501.631	501.631	501.631	501.631	501.631	501.631	501.631	501.631	501.631	501.631	501.631	501.631	501.631	501.631	501.631	501.631	501.631	501.631
R0631	501.63	501.63	501.63	501.63	501.63	501.629	501.63	501.63	501.63	501.63	501.63	501.63	501.63	501.63	501.63	501.63	501.63	501.63	501.63	501.63	501.63	501.357	501.63	501.63	501.63	501.629	501.63	501.63	501.63	501.63	501.629	501.63	501.63	501.63	501.63	501.63	501.63	501.63	501.63	501.63	501.63	501.63	501.63	501.63	501.63	501.63	501.63	501.63	501.63
R0632	501.63	501.63	501.63	501.63	501.63	501.629	501.63	501.63	501.63	501.63	501.63	501.63	501.63	501.63	501.63	501.63	501.63	501.63	501.63	501.63	501.63	501.357	501.63	501.63	501.63	501.629	501.63	501.63	501.63	501.63	501.629	501.63	501.63	501.63	501.63	501.63	501.63	501.63	501.63	501.63	501.63	501.63	501.63	501.63	501.63	501.63	501.63	501.63	501.63
R0633	501.635	501.635	501.635	501.635	501.635	501.634	501.635	501.635	501.635	501.635	501.635	501.635	501.635	501.635	501.635	501.635	501.635	501.635	501.635	501.635	501.635	501.362	501.635	501.635	501.635	501.634	501.635	501.635	501.635	501.635	501.634	501.635	501.635	501.635	501.635	501.635	501.635	501.635	501.635	501.635	501.635	501.635	501.635	501.635	501.635	501.635	501.635	501.635	501.635
R0634	501.807	501.807	501.807	501.807	501.807	501.806	501.807	501.807	501.807	501.807	501.807	501.807	501.807	501.807	501.807	501.807	501.807	501.807	501.807	501.807	501.807	501.534	501.807	501.807	501.807	501.806	501.807	501.807	501.807	501.807	501.806	501.807	501.807	501.807	501.807	501.807	501.807	501.807	501.807	501.807	501.807	501.807	501.807	501.807	501.807	501.807	501.807	501.807	501.807
R0635	0	0	0	0	-5.94317e-28	0	0	0	0	0	0	0	-5.94317e-28	1.48579e-28	0	0	0	0	0	0	0	0	0	-2.01874e-30	1.22416e-27	0	2.46286e-29	0	0	0	0	0	0	1.48579e-28	0	0	0	0	0	0	0	0	0	0	0	0	1.48579e-28	-9.85712e-35	1.15825e-29
R0636	575.441	575.441	575.441	575.441	575.441	575.44	575.441	575.441	575.441	575.441	575.441	575.441	575.441	575.441	575.441	575.441	575.441	575.441	575.441	575.441	575.441	575.168	575.441	575.441	575.441	575.44	575.441	575.441	575.441	575.441	575.44	575.441	575.441	575.441	575.441	575.441	575.441	575.441	575.441	575.441	575.441	575.441	575.441	575.441	575.441	575.441	575.441	575.441	575.441
R0637	501.807	501.807	501.807	501.807	501.807	501.806	501.807	501.807	501.807	501.807	501.807	501.807	501.807	501.807	501.807	501.807	501.807	501.807	501.807	501.807	501.807	501.534	501.807	501.807	501.807	501.806	501.807	501.807	501.807	501.807	501.806	501.807	501.807	501.807	501.807	501.807	501.807	501.807	501.807	501.807	501.807	501.807	501.807	501.807	501.807	501.807	501.807	501.807	501.807
R0638	501.631	501.631	501.631	501.631	501.631	501.63	501.631	501.631	501.631	501.631	501.631	501.631	501.631	501.631	501.631	501.631	501.631	501.631	501.631	501.631	501.631	501.358	501.631	501.631	501.631	501.63	501.631	501.631	501.631	501.631	501.63	501.631	501.631	501.631	501.631	501.631	501.631	501.631	501.631	501.631	501.631	501.631	501.631	501.631	501.631	501.631	501.631	501.631	501.631
R0639	501.631	501.631	501.631	501.631	501.631	501.63	501.631	501.631	501.631	501.631	501.631	501.631	501.631	501.631	501.631	501.631	501.631	501.631	501.631	501.631	501.631	501.358	501.631	501.631	501.631	501.63	501.631	501.631	501.631	501.631	501.63	501.631	501.631	501.631	501.631	501.631	501.631	501.631	501.631	501.631	501.631	501.631	501.631	501.631	501.631	501.631	501.631	501.631	501.631
R0640	501.631	501.631	501.631	501.631	501.631	501.63	501.631	501.631	501.631	501.631	501.631	501.631	501.631	501.631	501.631	501.631	501.631	501.631	501.631	501.631	501.631	501.358	501.631	501.631	501.631	501.63	501.631	501.631	501.631	501.631	501.63	501.631	501.631	501.631	501.631	501.631	501.631	501.631	501.631	501.631	501.631	501.631	501.631	501.631	501.631	501.631	501.631	501.631	501.631
R0641	501.63	501.63	501.63	501.63	501.63	501.629	501.63	501.63	501.63	501.63	501.63	501.63	501.63	501.63	501.63	501.63	501.63	501.63	501.63	501.63	501.63	501.357	501.63	501.63	501.63	501.629	501.63	501.63	501.63	501.63	501.629	501.63	501.63	501.63	501.63	501.63	501.63	501.63	501.63	501.63	501.63	501.63	501.63	501.63	501.63	501.63	501.63	501.63	501.63
R0642	286.645	286.645	286.645	286.645	286.645	286.644	286.645	286.645	286.645	286.645	286.645	286.645	286.645	286.645	286.645	286.645	286.645	286.645	286.645	286.645	286.645	286.488	286.645	286.645	286.645	286.644	286.645	286.645	286.645	286.645	286.644	286.645	286.645	286.645	286.645	286.645	286.645	286.645	286.645	286.645	286.645	286.645	286.645	286.645	286.645	286.645	286.645	286.645	286.645
R0647	501.63	501.63	501.63	501.63	501.63	501.629	501.63	501.63	501.63	501.63	501.63	501.63	501.63	501.63	501.63	501.63	501.63	501.63	501.63	501.63	501.63	501.357	501.63	501.63	501.63	501.629	501.63	501.63	501.63	501.63	501.629	501.63	501.63	501.63	501.63	501.63	501.63	501.63	501.63	501.63	501.63	501.63	501.63	501.63	501.63	501.63	501.63	501.63	501.63
R0648	501.63	501.63	501.63	501.63	501.63	501.629	501.63	501.63	501.63	501.63	501.63	501.63	501.63	501.63	501.63	501.63	501.63	501.63	501.63	501.63	501.63	501.357	501.63	501.63	501.63	501.629	501.63	501.63	501.63	501.63	501.629	501.63	501.63	501.63	501.63	501.63	501.63	501.63	501.63	501.63	501.63	501.63	501.63	501.63	501.63	501.63	501.63	501.63	501.63
R0649	0	0	0	0	0	0	0	0	0	0	0	0	0	0	0	0	0	0	0	0	0	0	0	0	0	0	0	0	0	0	0	0	0	0	0	0	0	0	0	0	0	0	0	0	0	0	0	0	0
R0650	0.00107117	0.00107117	0.00107117	0.00107117	0.00107117	0.00107117	0.00107117	0.00107117	0.00107117	0.00107117	0.00107117	0.00107117	0.00107117	0.00107117	0.00107117	0.00107117	0.00107117	0.00107117	0.00107117	0.00107117	0.00107117	0.00107117	0.00107117	0.00107117	0.00107117	0.00107117	0.00107117	0.00107117	0.00107117	0.00107117	0.00107117	0.00107117	0.00107117	0.00107117	0.00107117	0.00107117	0.00107117	0.00107117	0.00107117	0.00107117	0.00107117	0.00107117	0.00107117	0.00107117	0.00107117	0.00107117	0.00107117	0.00107117	0.00107117
R0651	-0.00548311	-0.00548311	-0.00548311	-0.00548311	-0.00548311	-0.00548311	-0.00548311	-0.00548311	-0.00548311	-0.00548311	-0.00548311	-0.00548311	-0.00548311	-0.00548311	-0.00548311	-0.00548311	-0.00548311	-0.00548311	-0.00548311	-0.00548311	-0.00548311	-0.00548311	-0.00548311	-0.00548311	-0.00548311	-0.00548311	-0.00548311	-0.00548311	-0.00548311	-0.00548311	-0.00548311	-0.00548311	-0.00548311	-0.00548311	-0.00548311	-0.00548311	-0.00548311	-0.00548311	-0.00548311	-0.00548311	-0.00548311	-0.00548311	-0.00548311	-0.00548311	-0.00548311	-0.00548311	-0.00548311	-0.00548311	-0.00548311
R0652	250.815	250.815	250.815	250.815	250.815	250.814	250.815	250.815	250.815	250.815	250.815	250.815	250.815	250.815	250.815	250.815	250.815	250.815	250.815	250.815	250.815	250.678	250.815	250.815	250.815	250.814	250.815	250.815	250.815	250.815	250.814	250.815	250.815	250.815	250.815	250.815	250.815	250.815	250.815	250.815	250.815	250.815	250.815	250.815	250.815	250.815	250.815	250.815	250.815
R0654	0.0011559	0.0011559	0.0011559	0.0011559	0.0011559	0.0011559	0.0011559	0.0011559	0.0011559	0.0011559	0.0011559	0.0011559	0.0011559	0.0011559	0.0011559	0.0011559	0.0011559	0.0011559	0.0011559	0.0011559	0.0011559	0.0011559	0.0011559	0.0011559	0.0011559	0.0011559	0.0011559	0.0011559	0.0011559	0.0011559	0.0011559	0.0011559	0.0011559	0.0011559	0.0011559	0.0011559	0.0011559	0.0011559	0.0011559	0.0011559	0.0011559	0.0011559	0.0011559	0.0011559	0.0011559	0.0011559	0.0011559	0.0011559	0.0011559
R0655	250.815	250.815	250.815	250.815	250.815	250.814	250.815	250.815	250.815	250.815	250.815	250.815	250.815	250.815	250.815	250.815	250.815	250.815	250.815	250.815	250.815	250.678	250.815	250.815	250.815	250.814	250.815	250.815	250.815	250.815	250.814	250.815	250.815	250.815	250.815	250.815	250.815	250.815	250.815	250.815	250.815	250.815	250.815	250.815	250.815	250.815	250.815	250.815	250.815
R0656	0.00107117	0.00107117	0.00107117	0.00107117	0.00107117	0.00107117	0.00107117	0.00107117	0.00107117	0.00107117	0.00107117	0.00107117	0.00107117	0.00107117	0.00107117	0.00107117	0.00107117	0.00107117	0.00107117	0.00107117	0.00107117	0.00107117	0.00107117	0.00107117	0.00107117	0.00107117	0.00107117	0.00107117	0.00107117	0.00107117	0.00107117	0.00107117	0.00107117	0.00107117	0.00107117	0.00107117	0.00107117	0.00107117	0.00107117	0.00107117	0.00107117	0.00107117	0.00107117	0.00107117	0.00107117	0.00107117	0.00107117	0.00107117	0.00107117
R0657	286.646	286.646	286.646	286.646	286.646	286.645	286.646	286.646	286.646	286.646	286.646	286.646	286.646	286.646	286.646	286.646	286.646	286.646	286.646	286.646	286.646	286.49	286.646	286.646	286.646	286.645	286.646	286.646	286.646	286.646	286.645	286.646	286.646	286.646	286.646	286.646	286.646	286.646	286.646	286.646	286.646	286.646	286.646	286.646	286.646	286.646	286.646	286.646	286.646
R0658	501.63	501.63	501.63	501.63	501.63	501.629	501.63	501.63	501.63	501.63	501.63	501.63	501.63	501.63	501.63	501.63	501.63	501.63	501.63	501.63	501.63	501.357	501.63	501.63	501.63	501.629	501.63	501.63	501.63	501.63	501.629	501.63	501.63	501.63	501.63	501.63	501.63	501.63	501.63	501.63	501.63	501.63	501.63	501.63	501.63	501.63	501.63	501.63	501.63
R0659	501.63	501.63	501.63	501.63	501.63	501.629	501.63	501.63	501.63	501.63	501.63	501.63	501.63	501.63	501.63	501.63	501.63	501.63	501.63	501.63	501.63	501.357	501.63	501.63	501.63	501.629	501.63	501.63	501.63	501.63	501.629	501.63	501.63	501.63	501.63	501.63	501.63	501.63	501.63	501.63	501.63	501.63	501.63	501.63	501.63	501.63	501.63	501.63	501.63
R0660	501.63	501.63	501.63	501.63	501.63	501.629	501.63	501.63	501.63	501.63	501.63	501.63	501.63	501.63	501.63	501.63	501.63	501.63	501.63	501.63	501.63	501.357	501.63	501.63	501.63	501.629	501.63	501.63	501.63	501.63	501.629	501.63	501.63	501.63	501.63	501.63	501.63	501.63	501.63	501.63	501.63	501.63	501.63	501.63	501.63	501.63	501.63	501.63	501.63
R0661	501.63	501.63	501.63	501.63	501.63	501.629	501.63	501.63	501.63	501.63	501.63	501.63	501.63	501.63	501.63	501.63	501.63	501.63	501.63	501.63	501.63	501.357	501.63	501.63	501.63	501.629	501.63	501.63	501.63	501.63	501.629	501.63	501.63	501.63	501.63	501.63	501.63	501.63	501.63	501.63	501.63	501.63	501.63	501.63	501.63	501.63	501.63	501.63	501.63
R0662	501.63	501.63	501.63	501.63	501.63	501.629	501.63	501.63	501.63	501.63	501.63	501.63	501.63	501.63	501.63	501.63	501.63	501.63	501.63	501.63	501.63	501.357	501.63	501.63	501.63	501.629	501.63	501.63	501.63	501.63	501.629	501.63	501.63	501.63	501.63	501.63	501.63	501.63	501.63	501.63	501.63	501.63	501.63	501.63	501.63	501.63	501.63	501.63	501.63
R0663	501.63	501.63	501.63	501.63	501.63	501.629	501.63	501.63	501.63	501.63	501.63	501.63	501.63	501.63	501.63	501.63	501.63	501.63	501.63	501.63	501.63	501.357	501.63	501.63	501.63	501.629	501.63	501.63	501.63	501.63	501.629	501.63	501.63	501.63	501.63	501.63	501.63	501.63	501.63	501.63	501.63	501.63	501.63	501.63	501.63	501.63	501.63	501.63	501.63
R0664	250.818	250.818	250.818	250.818	250.818	250.818	250.818	250.818	250.818	250.818	250.818	250.818	250.818	250.818	250.818	250.818	250.818	250.818	250.818	250.818	250.818	250.682	250.818	250.818	250.818	250.818	250.818	250.818	250.818	250.818	250.818	250.818	250.818	250.818	250.818	250.818	250.818	250.818	250.818	250.818	250.818	250.818	250.818	250.818	250.818	250.818	250.818	250.818	250.818
R0665	167.212	167.212	167.212	167.212	167.212	167.212	167.212	167.212	167.212	167.212	167.212	167.212	167.212	167.212	167.212	167.212	167.212	167.212	167.212	167.212	167.212	167.121	167.212	167.212	167.212	167.212	167.212	167.212	167.212	167.212	167.212	167.212	167.212	167.212	167.212	167.212	167.212	167.212	167.212	167.212	167.212	167.212	167.212	167.212	167.212	167.212	167.212	167.212	167.212
R0666	105.618	105.618	105.618	105.618	105.618	105.618	105.618	105.618	105.618	105.618	105.618	105.618	105.618	105.618	105.618	105.618	105.618	105.618	105.618	105.618	105.618	105.561	105.618	105.618	105.618	105.618	105.618	105.618	105.618	105.618	105.618	105.618	105.618	105.618	105.618	105.618	105.618	105.618	105.618	105.618	105.618	87.252	105.618	105.618	105.618	105.618	105.618	105.618	105.618
R0667	0	0	0	0	0	0	0	0	0	0	0	0	0	0	0	0	0	0	0	0	0	0	0	0	0	0	0	0	0	0	0	0	0	0	0	0	0	0	0	0	0	0	0	0	0	0	0	0	0
R0668	0	0	0	0	0	0	-5.35353e-14	0	0	0	0	0	0	0	0	0	0	0	0	0	0	0	0	0	0	0	0	0	0	0	0	0	0	0	0	0	0	0	0	0	0	0	0	0	0	0	0	0	0
R0669	668.84	668.84	668.84	668.84	668.84	668.839	668.84	668.84	668.84	668.84	668.84	668.84	668.84	668.84	668.84	668.84	668.84	668.84	668.84	668.84	668.84	668.476	668.84	668.84	668.84	668.839	668.84	668.84	668.84	668.84	668.839	668.84	668.84	668.84	668.84	668.84	668.84	668.84	668.84	668.84	668.84	668.84	668.84	668.84	668.84	668.84	668.84	668.84	668.84
R0670	1000	1000	1000	1000	1000	1000	1000	1000	1000	1000	1000	1000	1000	1000	1000	1000	1000	1000	1000	1000	1000	1000	1000	1000	1000	1000	1000	1000	1000	1000	1000	1000	1000	1000	1000	1000	1000	1000	1000	1000	1000	1000	1000	1000	1000	1000	1000	1000	1000
R0671	999.005	999.005	999.005	999.005	999.005	999.003	999.005	999.005	999.005	999.005	999.005	999.005	999.005	999.005	999.005	999.005	999.005	999.005	999.005	999.005	999.005	999.005	999.005	999.005	999.005	999.003	999.005	999.005	999.005	999.005	999.003	999.005	999.005	999.005	999.005	999.005	999.005	999.005	999.005	999.005	999.005	999.005	999.005	999.005	999.005	999.005	999.005	999.005	999.005
R0672	200.652	200.652	200.652	200.652	200.652	200.652	200.652	200.652	200.652	200.652	200.652	200.652	200.652	200.652	200.652	200.652	200.652	200.652	200.652	200.652	200.652	200.543	200.652	200.652	200.652	200.652	200.652	200.652	200.652	200.652	200.652	200.652	200.652	200.652	200.652	200.652	200.652	200.652	200.652	200.652	200.652	200.652	200.652	200.652	200.652	200.652	200.652	200.652	200.652
R0673	0	0	0	0	0	0	0	0	0	0	0	0	0	0	0	0	0	0	0	0	0	0	0	0	0	0	0	0	0	0	0	0	0	0	0	0	0	0	0	0	0	0	0	0	0	0	0	0	0
R0674	0	0	0	0	0	0	0	0	0	0	0	0	0	0	0	0	0	0	0	0	0	0	0	0	0	0	0	0	0	0	0	0	0	0	0	0	0	0	0	0	0	0	0	0	0	0	0	0	0
R0675	0.00824009	0.00824009	0.00824009	0.00824009	0.00824009	0.00824009	0.00824009	0.00824009	0.00824009	0.00824009	0.00824009	0.00824009	0.00824009	0.00824009	0.00824009	0.00824009	0.00824009	0.00824009	0.00824009	0.00824009	0.00824009	0.00824009	0.00824009	0.00824009	0.00824009	0.00824009	0.00824009	0.00824009	0.00824009	0.00824009	0.00824009	0.00824009	0.00824009	0.00824009	0.00824009	0.00824009	0.00824009	0.00824009	0.00824009	0.00824009	0.00824009	0.00824009	0.00824009	0.00824009	0.00824009	0.00824009	0.00824009	0.00824009	0.00824009
R0676	0	0	0	0	0	0	0	0	0	0	0	0	0	0	0	0	0	0	0	0	0	0	0	0	0	0	1.04475e-27	0	0	0	0	0	0	0	0	0	0	0	0	0	0	0	3.7887e-34	0	0	0	0	-1.11912e-31	0
R0677	0	0	0	0	0	0	0	0	0	0	0	0	0	0	0	0	0	0	0	0	0	0	0	0	0	0	1.04512e-27	0	0	0	0	0	0	0	0	0	0	0	0	0	0	0	3.59714e-34	0	0	0	0	-1.14012e-31	0
R0678	0	0	0	0	0	0	0	0	0	0	0	0	0	0	0	0	0	0	0	0	0	0	0	0	0	0	1.04456e-27	0	0	0	0	0	0	0	0	0	0	0	0	0	0	0	4.29472e-34	0	0	0	0	-1.15442e-31	0
R0679	0	0	0	0	0	0	0	0	0	0	0	0	0	0	0	0	0	0	0	0	0	0	0	0	0	0	0	0	0	0	0	0	0	0	0	0	0	0	0	0	0	0	0	0	0	0	0	0	0
R0680	0	0	0	0	0	0	0	0	0	0	0	0	0	0	0	0	0	0	0	0	0	0	0	0	0	0	1.04495e-27	0	0	0	0	0	0	0	0	0	0	0	0	0	0	0	3.61728e-34	0	0	0	0	-1.12098e-31	0
R0681	0	0	0	0	0	0	0	0	0	0	0	0	0	0	0	0	0	0	0	0	0	0	0	0	0	0	2.09046e-27	0	0	0	0	0	0	0	0	0	0	0	0	0	0	0	7.57739e-34	0	0	0	0	-2.23825e-31	0
R0682	0	0	0	0	0	0	0	0	0	0	0	0	0	0	0	0	0	0	0	0	0	0	0	0	0	0	2.08964e-27	0	0	0	0	0	0	0	0	0	0	0	0	0	0	0	7.84467e-34	0	0	0	0	-2.17559e-31	0
R0683	0	0	0	0	0	0	0	0	0	0	0	0	0	0	0	0	0	0	0	0	0	0	0	0	0	0	1.04492e-27	0	0	0	0	0	0	0	0	0	0	0	0	0	0	0	3.7887e-34	0	0	0	0	-1.12694e-31	0
R0684	0	0	0	0	0	0	0	0	0	0	0	0	0	0	0	0	0	0	0	0	0	0	0	0	0	0	1.04456e-27	0	0	0	0	0	0	0	0	0	0	0	0	0	0	0	3.43578e-34	0	0	0	0	-1.15442e-31	0
R0685	0	0	0	0	0	0	0	0	0	0	0	0	0	0	0	0	0	0	0	0	0	0	0	0	0	0	1.04465e-27	0	0	0	0	0	0	0	0	0	0	0	0	0	0	0	3.49948e-34	0	0	0	0	-1.11983e-31	0
R0686	501.63	501.63	501.63	501.63	501.63	501.629	501.63	501.63	501.63	501.63	501.63	501.63	501.63	501.63	501.63	501.63	501.63	501.63	501.63	501.63	501.63	501.357	501.63	501.63	501.63	501.629	501.63	501.63	501.63	501.63	501.629	501.63	501.63	501.63	501.63	501.63	501.63	501.63	501.63	501.63	501.63	501.63	501.63	501.63	501.63	501.63	501.63	501.63	501.63
R0687	501.636	501.636	501.636	501.636	501.636	501.634	501.636	501.636	501.636	501.636	501.636	501.636	501.636	501.636	501.636	501.636	501.636	501.636	501.636	501.636	501.636	501.362	501.636	501.636	501.636	501.634	501.636	501.636	501.636	501.636	501.634	501.636	501.636	501.636	501.636	501.636	501.636	501.636	501.636	501.636	501.636	501.636	501.636	501.636	501.636	501.636	501.636	501.636	501.636
R0688	0.00769511	0.00769511	0.00769511	0.00769511	0.00769511	0.00769511	0.00769511	0.00769511	0.00769511	0.00769511	0.00769511	0.00769511	0.00769511	0.00769511	0.00769511	0.00769511	0.00769511	0.00769511	0.00769511	0.00769511	0.00769511	0.00769511	0.00769511	0.00769511	0.00769511	0.00769511	0.00769511	0.00769511	0.00769511	0.00769511	0.00769511	0.00769511	0.00769511	0.00769511	0.00769511	0.00769511	0.00769511	0.00769511	0.00769511	0.00769511	0.00769511	0.00769511	0.00769511	0.00769511	0.00769511	0.00769511	0.00769511	0.00769511	0.00769511
R0689	0.0065935	0.0065935	0.0065935	0.0065935	0.0065935	0.0065935	0.0065935	0.0065935	0.0065935	0.0065935	0.0065935	0.0065935	0.0065935	0.0065935	0.0065935	0.0065935	0.0065935	0.0065935	0.0065935	0.0065935	0.0065935	0.0065935	0.0065935	0.0065935	0.0065935	0.0065935	0.0065935	0.0065935	0.0065935	0.0065935	0.0065935	0.0065935	0.0065935	0.0065935	0.0065935	0.0065935	0.0065935	0.0065935	0.0065935	0.0065935	0.0065935	0.0065935	0.0065935	0.0065935	0.0065935	0.0065935	0.0065935	0.0065935	0.0065935
R0690	0.00769511	0.00769511	0.00769511	0.00769511	0.00769511	0.00769511	0.00769511	0.00769511	0.00769511	0.00769511	0.00769511	0.00769511	0.00769511	0.00769511	0.00769511	0.00769511	0.00769511	0.00769511	0.00769511	0.00769511	0.00769511	0.00769511	0.00769511	0.00769511	0.00769511	0.00769511	0.00769511	0.00769511	0.00769511	0.00769511	0.00769511	0.00769511	0.00769511	0.00769511	0.00769511	0.00769511	0.00769511	0.00769511	0.00769511	0.00769511	0.00769511	0.00769511	0.00769511	0.00769511	0.00769511	0.00769511	0.00769511	0.00769511	0.00769511
R0691	0	0	0	0	0	0	0	0	0	0	0	0	0	0	0	0	0	0	0	0	0	0	0	0	0	0	0	0	0	0	0	0	0	0	0	0	0	0	0	0	0	0	0	0	0	0	0	0	0
R0694	501.63	501.63	501.63	501.63	501.63	501.629	501.63	501.63	501.63	501.63	501.63	501.63	501.63	501.63	501.63	501.63	501.63	501.63	501.63	501.63	501.63	501.357	501.63	501.63	501.63	501.629	501.63	501.63	501.63	501.63	501.629	501.63	501.63	501.63	501.63	501.63	501.63	501.63	501.63	501.63	501.63	501.63	501.63	501.63	501.63	501.63	501.63	501.63	501.63
R0696	0	0	0	0	0	0	0	0	0	0	0	0	0	0	0	0	0	0	0	0	0	0	0	0	0	0	0	0	0	0	0	0	0	0	0	0	0	0	0	0	0	0	0	0	0	0	0	0	0
R0697	0	0	0	0	0	0	0	0	0	0	0	0	0	0	0	0	0	0	0	0	0	0	0	0	0	0	0	0	0	0	0	0	0	0	0	0	0	0	0	0	0	0	0	0	0	0	0	0	0
R0698	0	0	0	0	0	0	0	0	0	0	0	0	0	0	0	0	0	0	0	0	0	0	0	0	0	0	0	0	0	0	0	0	0	0	0	0	0	0	0	0	0	0	0	0	0	0	0	0	0
R0699	0	0	0	0	0	0	0	0	0	0	0	0	0	0	0	0	0	0	0	0	0	0	0	0	0	0	0	0	0	0	0	0	0	0	0	0	0	0	0	0	0	0	0	0	0	0	0	0	0
R0700	0	0	0	0	0	0	0	0	0	0	0	0	0	0	0	0	0	0	0	0	0	0	0	0	0	0	0	0	0	0	0	0	0	0	0	0	0	0	0	0	0	0	0	0	0	0	0	0	0
R0701	0	0	0	0	0	0	0	0	0	0	0	0	0	0	0	0	0	0	0	0	0	0	0	0	0	0	0	0	0	0	0	0	0	0	0	0	0	0	0	0	0	0	0	0	0	0	0	0	0
R0702	0	0	0	0	0	0	0	0	0	0	0	0	0	0	0	0	0	0	0	0	0	0	0	0	0	0	0	0	0	0	0	0	0	0	0	0	0	0	0	0	0	0	0	0	0	0	0	0	0
R0703	0	0	0	0	0	0	0	0	0	0	0	0	0	0	0	0	0	0	0	0	0	0	0	0	0	0	0	0	0	0	0	0	0	0	0	0	0	0	0	0	0	0	0	0	0	0	0	0	0
R0704	0	0	0	0	0	0	0	0	0	0	0	0	0	0	0	0	0	0	0	0	0	0	0	0	0	0	0	0	0	0	0	0	0	0	0	0	0	0	0	0	0	0	0	0	0	0	0	0	0
R0705	0	0	0	0	0	0	0	0	0	0	0	0	0	0	0	0	0	0	0	0	0	0	0	0	0	0	0	0	0	0	0	0	0	0	0	0	0	0	0	0	0	0	0	0	0	0	0	0	0
R0706	0	0	0	0	0	0	0	0	0	0	0	0	0	0	0	0	0	0	0	0	0	0	0	0	0	0	0	0	0	0	0	0	0	0	0	0	0	0	0	0	0	0	0	0	0	0	0	0	0
R0707	0	0	0	0	0	0	0	0	0	0	0	0	0	0	0	0	0	0	0	0	0	0	0	0	0	0	0	0	0	0	0	0	0	0	0	0	0	0	0	0	0	0	0	0	0	0	0	0	0
R0708	0	0	0	0	0	0	0	0	0	0	0	0	0	0	0	0	0	0	0	0	0	0	0	0	0	0	0	0	0	0	0	0	0	0	0	0	0	0	0	0	0	0	0	0	0	0	0	0	0
R0709	0	0	0	0	0	0	0	0	0	0	0	0	0	0	0	0	0	0	0	0	0	0	0	0	0	0	0	0	0	0	0	0	0	0	0	0	0	0	0	0	0	0	0	0	0	0	0	0	0
R0710	0	0	0	0	0	0	0	0	0	0	0	0	0	0	0	0	0	0	0	0	0	0	0	0	0	0	0	0	0	0	0	0	0	0	0	0	0	0	0	0	0	0	0	0	0	0	0	0	0
R0711	0	0	0	0	0	0	0	0	0	0	0	0	0	0	0	0	0	0	0	0	0	0	0	0	0	0	0	0	0	0	0	0	0	0	0	0	0	0	0	0	0	0	0	0	0	0	0	0	0
R0712	0	0	0	0	0	0	0	0	0	0	0	0	0	0	0	0	0	0	0	0	0	0	0	0	0	0	0	0	0	0	0	0	0	0	0	0	0	0	0	0	0	0	0	0	0	0	0	0	0
R0713	0	0	0	0	0	0	0	0	0	0	0	0	0	0	0	0	0	0	0	0	0	0	0	0	0	0	0	0	0	0	0	0	0	0	0	0	0	0	0	0	0	0	0	0	0	0	0	0	0
R0714	0	0	0	0	0	0	0	0	0	0	0	0	0	0	0	0	0	0	0	0	0	0	0	0	0	0	0	0	0	0	0	0	0	0	0	0	0	0	0	0	0	0	0	0	0	0	0	0	0
R0715	0	0	0	0	0	0	0	0	0	0	0	0	0	0	0	0	0	0	0	0	0	0	0	0	0	0	0	0	0	0	0	0	0	0	0	0	0	0	0	0	0	0	0	0	0	0	0	0	0
R0716	0	0	0	0	0	0	0	0	0	0	0	0	0	0	0	0	0	0	0	0	0	0	0	0	0	0	0	0	0	0	0	0	0	0	0	0	0	0	0	0	0	0	0	0	0	0	0	0	0
R0717	0	0	0	0	0	0	0	0	0	0	0	0	0	0	0	0	0	0	0	0	0	0	0	0	0	0	0	0	0	0	0	0	0	0	0	0	0	0	0	0	0	0	0	0	0	0	0	0	0
R0718	0	0	0	0	0	0	0	0	0	0	0	0	0	0	0	0	0	0	0	0	0	0	0	0	0	0	0	0	0	0	0	0	0	0	0	0	0	0	0	0	0	0	0	0	0	0	0	0	0
R0719	0	0	0	0	0	0	0	0	0	0	0	0	0	0	0	0	0	0	0	0	0	0	0	0	0	0	0	0	0	0	0	0	0	0	0	0	0	0	0	0	0	0	0	0	0	0	0	0	0
R0720	0	0	0	0	0	0	0	0	0	0	0	0	0	0	0	0	0	0	0	0	0	0	0	0	0	0	0	0	0	0	0	0	0	0	0	0	0	0	0	0	0	0	0	0	0	0	0	0	0
R0721	0	0	0	0	0	0	0	0	0	0	0	0	0	0	0	0	0	0	0	0	0	0	0	0	0	0	0	0	0	0	0	0	0	0	0	0	0	0	0	0	0	0	0	0	0	0	0	0	0
R0722	0	0	0	0	0	0	0	0	0	0	0	0	0	0	0	0	0	0	0	0	0	0	0	0	0	0	0	0	0	0	0	0	0	0	0	0	0	0	0	0	0	0	0	0	0	0	0	0	0
R0723	0	0	0	0	0	0	0	0	0	0	0	0	0	0	0	0	0	0	0	0	0	0	0	0	0	0	0	0	0	0	0	0	0	0	0	0	0	0	0	0	0	0	0	0	0	0	0	0	0
R0724	182.411	182.411	182.411	182.411	182.411	182.411	182.411	182.411	182.411	182.411	182.411	182.411	182.411	182.411	182.411	182.411	182.411	182.411	182.411	182.411	182.411	182.312	182.411	182.411	182.411	182.411	182.411	182.411	182.411	182.411	182.411	182.411	182.411	182.411	182.411	182.411	182.411	182.411	182.411	182.411	182.411	182.411	182.411	182.411	182.411	182.411	182.411	182.411	182.411
R0725	0	0	0	0	0	0	0	0	0	0	0	0	0	0	0	0	0	0	0	0	0	0	0	0	0	0	0	0	0	0	0	0	0	0	0	0	0	0	0	0	0	0	0	0	0	0	0	0	0
R0726	575.415	575.415	575.415	575.415	575.415	575.413	575.415	575.415	575.415	575.415	575.415	575.415	575.415	575.415	575.415	575.415	575.415	575.415	575.415	575.415	575.415	575.141	575.415	575.415	575.415	575.413	575.415	575.415	575.415	575.415	575.413	575.415	575.415	575.415	575.415	575.415	575.415	575.415	575.415	575.415	575.415	575.415	575.415	575.415	575.415	575.415	575.415	575.415	575.415
R0728	286.646	286.646	286.646	286.646	286.646	286.645	286.646	286.646	286.646	286.646	286.646	286.646	286.646	286.646	286.646	286.646	286.646	286.646	286.646	286.646	286.646	286.49	286.646	286.646	286.646	286.645	286.646	286.646	286.646	286.646	286.645	286.646	286.646	286.646	286.646	286.646	286.646	286.646	286.646	286.646	286.646	286.646	286.646	286.646	286.646	286.646	286.646	286.646	286.646
R0731	575.415	575.415	575.415	575.415	575.415	575.413	575.415	575.415	575.415	575.415	575.415	575.415	575.415	575.415	575.415	575.415	575.415	575.415	575.415	575.415	575.415	575.141	575.415	575.415	575.415	575.413	575.415	575.415	575.415	575.415	575.413	575.415	575.415	575.415	575.415	575.415	575.415	575.415	575.415	575.415	575.415	575.415	575.415	575.415	575.415	575.415	575.415	575.415	575.415
R0732	575.415	575.415	575.415	575.415	575.415	575.413	575.415	575.415	575.415	575.415	575.415	575.415	575.415	575.415	575.415	575.415	575.415	575.415	575.415	575.415	575.415	575.141	575.415	575.415	575.415	575.413	575.415	575.415	575.415	575.415	575.413	575.415	575.415	575.415	575.415	575.415	575.415	575.415	575.415	575.415	575.415	575.415	575.415	575.415	575.415	575.415	575.415	575.415	575.415
R0733	182.411	182.411	182.411	182.411	182.411	182.411	182.411	182.411	182.411	182.411	182.411	182.411	182.411	182.411	182.411	182.411	182.411	182.411	182.411	182.411	182.411	182.312	182.411	182.411	182.411	182.411	182.411	182.411	182.411	182.411	182.411	182.411	182.411	182.411	182.411	182.411	182.411	182.411	182.411	182.411	182.411	182.411	182.411	182.411	182.411	182.411	182.411	182.411	182.411
R0734	182.411	182.411	182.411	182.411	182.411	182.411	182.411	182.411	182.411	182.411	182.411	182.411	182.411	182.411	182.411	182.411	182.411	182.411	182.411	182.411	182.411	182.312	182.411	182.411	182.411	182.411	182.411	182.411	182.411	182.411	182.411	182.411	182.411	182.411	182.411	182.411	182.411	182.411	182.411	182.411	182.411	182.411	182.411	182.411	182.411	182.411	182.411	182.411	182.411
R0735	0	0	0	0	0	0	0	0	0	0	0	0	0	0	0	0	0	0	0	0	0	0	0	0	0	0	0	0	0	0	0	0	0	0	0	0	0	0	0	0	0	0	0	0	0	0	0	0	0
R0736	286.646	286.646	286.646	286.646	286.646	286.645	286.646	286.646	286.646	286.646	286.646	286.646	286.646	286.646	286.646	286.646	286.646	286.646	286.646	286.646	286.646	286.49	286.646	286.646	286.646	286.645	286.646	286.646	286.646	286.646	286.645	286.646	286.646	286.646	286.646	286.646	286.646	286.646	286.646	286.646	286.646	286.646	286.646	286.646	286.646	286.646	286.646	286.646	286.646
R0738	286.658	286.658	286.658	286.658	286.658	286.657	286.658	286.658	286.658	286.658	286.658	286.658	286.658	286.658	286.658	286.658	286.658	286.658	286.658	286.658	286.658	286.502	286.658	286.658	286.658	286.657	286.658	286.658	286.658	286.658	286.657	286.658	286.658	286.658	286.658	286.658	286.658	286.658	286.658	286.658	286.658	286.658	286.658	286.658	286.658	286.658	286.658	286.658	286.658
R0741	0	0	0	0	0	0	0	0	0	0	0	0	0	0	0	0	0	0	0	0	0	0	0	0	0	0	0	0	0	0	0	0	0	0	0	0	0	0	0	0	0	0	0	0	0	0	0	0	0
R0742	0.00137092	0.00137092	0.00137092	0.00137092	0.00137092	0.00137092	0.00137092	0.00137092	0.00137092	0.00137092	0.00137092	0.00137092	0.00137092	0.00137092	0.00137092	0.00137092	0.00137092	0.00137092	0.00137092	0.00137092	0.00137092	0.00137092	0.00137092	0.00137092	0.00137092	0.00137092	0.00137092	0.00137092	0.00137092	0.00137092	0.00137092	0.00137092	0.00137092	0.00137092	0.00137092	0.00137092	0.00137092	0.00137092	0.00137092	0.00137092	0.00137092	0.00137092	0.00137092	0.00137092	0.00137092	0.00137092	0.00137092	0.00137092	0.00137092
R0743	0.00137092	0.00137092	0.00137092	0.00137092	0.00137092	0.00137092	0.00137092	0.00137092	0.00137092	0.00137092	0.00137092	0.00137092	0.00137092	0.00137092	0.00137092	0.00137092	0.00137092	0.00137092	0.00137092	0.00137092	0.00137092	0.00137092	0.00137092	0.00137092	0.00137092	0.00137092	0.00137092	0.00137092	0.00137092	0.00137092	0.00137092	0.00137092	0.00137092	0.00137092	0.00137092	0.00137092	0.00137092	0.00137092	0.00137092	0.00137092	0.00137092	0.00137092	0.00137092	0.00137092	0.00137092	0.00137092	0.00137092	0.00137092	0.00137092
R0744	0.00137092	0.00137092	0.00137092	0.00137092	0.00137092	0.00137092	0.00137092	0.00137092	0.00137092	0.00137092	0.00137092	0.00137092	0.00137092	0.00137092	0.00137092	0.00137092	0.00137092	0.00137092	0.00137092	0.00137092	0.00137092	0.00137092	0.00137092	0.00137092	0.00137092	0.00137092	0.00137092	0.00137092	0.00137092	0.00137092	0.00137092	0.00137092	0.00137092	0.00137092	0.00137092	0.00137092	0.00137092	0.00137092	0.00137092	0.00137092	0.00137092	0.00137092	0.00137092	0.00137092	0.00137092	0.00137092	0.00137092	0.00137092	0.00137092
R0746	0.00137092	0.00137092	0.00137092	0.00137092	0.00137092	0.00137092	0.00137092	0.00137092	0.00137092	0.00137092	0.00137092	0.00137092	0.00137092	0.00137092	0.00137092	0.00137092	0.00137092	0.00137092	0.00137092	0.00137092	0.00137092	0.00137092	0.00137092	0.00137092	0.00137092	0.00137092	0.00137092	0.00137092	0.00137092	0.00137092	0.00137092	0.00137092	0.00137092	0.00137092	0.00137092	0.00137092	0.00137092	0.00137092	0.00137092	0.00137092	0.00137092	0.00137092	0.00137092	0.00137092	0.00137092	0.00137092	0.00137092	0.00137092	0.00137092
R0747	0.00137335	0.00137335	0.00137335	0.00137335	0.00137335	0.00137335	0.00137335	0.00137335	0.00137335	0.00137335	0.00137335	0.00137335	0.00137335	0.00137335	0.00137335	0.00137335	0.00137335	0.00137335	0.00137335	0.00137335	0.00137335	0.00137335	0.00137335	0.00137335	0.00137335	0.00137335	0.00137335	0.00137335	0.00137335	0.00137335	0.00137335	0.00137335	0.00137335	0.00137335	0.00137335	0.00137335	0.00137335	0.00137335	0.00137335	0.00137335	0.00137335	0.00137335	0.00137335	0.00137335	0.00137335	0.00137335	0.00137335	0.00137335	0.00137335
R0748	0.00137092	0.00137092	0.00137092	0.00137092	0.00137092	0.00137092	0.00137092	0.00137092	0.00137092	0.00137092	0.00137092	0.00137092	0.00137092	0.00137092	0.00137092	0.00137092	0.00137092	0.00137092	0.00137092	0.00137092	0.00137092	0.00137092	0.00137092	0.00137092	0.00137092	0.00137092	0.00137092	0.00137092	0.00137092	0.00137092	0.00137092	0.00137092	0.00137092	0.00137092	0.00137092	0.00137092	0.00137092	0.00137092	0.00137092	0.00137092	0.00137092	0.00137092	0.00137092	0.00137092	0.00137092	0.00137092	0.00137092	0.00137092	0.00137092
R0750	0.000259774	0.000259774	0.000259774	0.000259774	0.000259774	0.000259774	0.000259774	0.000259774	0.000259774	0.000259774	0.000259774	0.000259774	0.000259774	0.000259774	0.000259774	0.000259774	0.000259774	0.000259774	0.000259774	0.000259774	0.000259774	0.000259774	0.000259774	0.000259774	0.000259774	0.000259774	0.000259774	0.000259774	0.000259774	0.000259774	0.000259774	0.000259774	0.000259774	0.000259774	0.000259774	0.000259774	0.000259774	0.000259774	0.000259774	0.000259774	0.000259774	0.000259774	0.000259774	0.000259774	0.000259774	0.000259774	0.000259774	0.000259774	0.000259774
R0751	0.000259774	0.000259774	0.000259774	0.000259774	0.000259774	0.000259774	0.000259774	0.000259774	0.000259774	0.000259774	0.000259774	0.000259774	0.000259774	0.000259774	0.000259774	0.000259774	0.000259774	0.000259774	0.000259774	0.000259774	0.000259774	0.000259774	0.000259774	0.000259774	0.000259774	0.000259774	0.000259774	0.000259774	0.000259774	0.000259774	0.000259774	0.000259774	0.000259774	0.000259774	0.000259774	0.000259774	0.000259774	0.000259774	0.000259774	0.000259774	0.000259774	0.000259774	0.000259774	0.000259774	0.000259774	0.000259774	0.000259774	0.000259774	0.000259774
R0754	0.00137335	0.00137335	0.00137335	0.00137335	0.00137335	0.00137335	0.00137335	0.00137335	0.00137335	0.00137335	0.00137335	0.00137335	0.00137335	0.00137335	0.00137335	0.00137335	0.00137335	0.00137335	0.00137335	0.00137335	0.00137335	0.00137335	0.00137335	0.00137335	0.00137335	0.00137335	0.00137335	0.00137335	0.00137335	0.00137335	0.00137335	0.00137335	0.00137335	0.00137335	0.00137335	0.00137335	0.00137335	0.00137335	0.00137335	0.00137335	0.00137335	0.00137335	0.00137335	0.00137335	0.00137335	0.00137335	0.00137335	0.00137335	0.00137335
R0755	0.00137335	0.00137335	0.00137335	0.00137335	0.00137335	0.00137335	0.00137335	0.00137335	0.00137335	0.00137335	0.00137335	0.00137335	0.00137335	0.00137335	0.00137335	0.00137335	0.00137335	0.00137335	0.00137335	0.00137335	0.00137335	0.00137335	0.00137335	0.00137335	0.00137335	0.00137335	0.00137335	0.00137335	0.00137335	0.00137335	0.00137335	0.00137335	0.00137335	0.00137335	0.00137335	0.00137335	0.00137335	0.00137335	0.00137335	0.00137335	0.00137335	0.00137335	0.00137335	0.00137335	0.00137335	0.00137335	0.00137335	0.00137335	0.00137335
R0756	0.00137092	0.00137092	0.00137092	0.00137092	0.00137092	0.00137092	0.00137092	0.00137092	0.00137092	0.00137092	0.00137092	0.00137092	0.00137092	0.00137092	0.00137092	0.00137092	0.00137092	0.00137092	0.00137092	0.00137092	0.00137092	0.00137092	0.00137092	0.00137092	0.00137092	0.00137092	0.00137092	0.00137092	0.00137092	0.00137092	0.00137092	0.00137092	0.00137092	0.00137092	0.00137092	0.00137092	0.00137092	0.00137092	0.00137092	0.00137092	0.00137092	0.00137092	0.00137092	0.00137092	0.00137092	0.00137092	0.00137092	0.00137092	0.00137092
R0757	0.000259774	0.000259774	0.000259774	0.000259774	0.000259774	0.000259774	0.000259774	0.000259774	0.000259774	0.000259774	0.000259774	0.000259774	0.000259774	0.000259774	0.000259774	0.000259774	0.000259774	0.000259774	0.000259774	0.000259774	0.000259774	0.000259774	0.000259774	0.000259774	0.000259774	0.000259774	0.000259774	0.000259774	0.000259774	0.000259774	0.000259774	0.000259774	0.000259774	0.000259774	0.000259774	0.000259774	0.000259774	0.000259774	0.000259774	0.000259774	0.000259774	0.000259774	0.000259774	0.000259774	0.000259774	0.000259774	0.000259774	0.000259774	0.000259774
R0758	0.000259774	0.000259774	0.000259774	0.000259774	0.000259774	0.000259774	0.000259774	0.000259774	0.000259774	0.000259774	0.000259774	0.000259774	0.000259774	0.000259774	0.000259774	0.000259774	0.000259774	0.000259774	0.000259774	0.000259774	0.000259774	0.000259774	0.000259774	0.000259774	0.000259774	0.000259774	0.000259774	0.000259774	0.000259774	0.000259774	0.000259774	0.000259774	0.000259774	0.000259774	0.000259774	0.000259774	0.000259774	0.000259774	0.000259774	0.000259774	0.000259774	0.000259774	0.000259774	0.000259774	0.000259774	0.000259774	0.000259774	0.000259774	0.000259774
R0759	0.000259774	0.000259774	0.000259774	0.000259774	0.000259774	0.000259774	0.000259774	0.000259774	0.000259774	0.000259774	0.000259774	0.000259774	0.000259774	0.000259774	0.000259774	0.000259774	0.000259774	0.000259774	0.000259774	0.000259774	0.000259774	0.000259774	0.000259774	0.000259774	0.000259774	0.000259774	0.000259774	0.000259774	0.000259774	0.000259774	0.000259774	0.000259774	0.000259774	0.000259774	0.000259774	0.000259774	0.000259774	0.000259774	0.000259774	0.000259774	0.000259774	0.000259774	0.000259774	0.000259774	0.000259774	0.000259774	0.000259774	0.000259774	0.000259774
R0760	0.00824009	0.00824009	0.00824009	0.00824009	0.00824009	0.00824009	0.00824009	0.00824009	0.00824009	0.00824009	0.00824009	0.00824009	0.00824009	0.00824009	0.00824009	0.00824009	0.00824009	0.00824009	0.00824009	0.00824009	0.00824009	0.00824009	0.00824009	0.00824009	0.00824009	0.00824009	0.00824009	0.00824009	0.00824009	0.00824009	0.00824009	0.00824009	0.00824009	0.00824009	0.00824009	0.00824009	0.00824009	0.00824009	0.00824009	0.00824009	0.00824009	0.00824009	0.00824009	0.00824009	0.00824009	0.00824009	0.00824009	0.00824009	0.00824009
R0761	0.0027467	0.0027467	0.0027467	0.0027467	0.0027467	0.0027467	0.0027467	0.0027467	0.0027467	0.0027467	0.0027467	0.0027467	0.0027467	0.0027467	0.0027467	0.0027467	0.0027467	0.0027467	0.0027467	0.0027467	0.0027467	0.0027467	0.0027467	0.0027467	0.0027467	0.0027467	0.0027467	0.0027467	0.0027467	0.0027467	0.0027467	0.0027467	0.0027467	0.0027467	0.0027467	0.0027467	0.0027467	0.0027467	0.0027467	0.0027467	0.0027467	0.0027467	0.0027467	0.0027467	0.0027467	0.0027467	0.0027467	0.0027467	0.0027467
R0762	0.0027467	0.0027467	0.0027467	0.0027467	0.0027467	0.0027467	0.0027467	0.0027467	0.0027467	0.0027467	0.0027467	0.0027467	0.0027467	0.0027467	0.0027467	0.0027467	0.0027467	0.0027467	0.0027467	0.0027467	0.0027467	0.0027467	0.0027467	0.0027467	0.0027467	0.0027467	0.0027467	0.0027467	0.0027467	0.0027467	0.0027467	0.0027467	0.0027467	0.0027467	0.0027467	0.0027467	0.0027467	0.0027467	0.0027467	0.0027467	0.0027467	0.0027467	0.0027467	0.0027467	0.0027467	0.0027467	0.0027467	0.0027467	0.0027467
R0763	0.0027467	0.0027467	0.0027467	0.0027467	0.0027467	0.0027467	0.0027467	0.0027467	0.0027467	0.0027467	0.0027467	0.0027467	0.0027467	0.0027467	0.0027467	0.0027467	0.0027467	0.0027467	0.0027467	0.0027467	0.0027467	0.0027467	0.0027467	0.0027467	0.0027467	0.0027467	0.0027467	0.0027467	0.0027467	0.0027467	0.0027467	0.0027467	0.0027467	0.0027467	0.0027467	0.0027467	0.0027467	0.0027467	0.0027467	0.0027467	0.0027467	0.0027467	0.0027467	0.0027467	0.0027467	0.0027467	0.0027467	0.0027467	0.0027467
R0764	0	0	0	0	0	0	0	0	0	0	0	0	0	0	0	0	0	0	0	0	0	0	0	0	0	0	0	0	0	0	0	0	0	0	0	0	0	0	0	0	0	0	0	0	0	0	0	0	0
R0765	0.00824009	0.00824009	0.00824009	0.00824009	0.00824009	0.00824009	0.00824009	0.00824009	0.00824009	0.00824009	0.00824009	0.00824009	0.00824009	0.00824009	0.00824009	0.00824009	0.00824009	0.00824009	0.00824009	0.00824009	0.00824009	0.00824009	0.00824009	0.00824009	0.00824009	0.00824009	0.00824009	0.00824009	0.00824009	0.00824009	0.00824009	0.00824009	0.00824009	0.00824009	0.00824009	0.00824009	0.00824009	0.00824009	0.00824009	0.00824009	0.00824009	0.00824009	0.00824009	0.00824009	0.00824009	0.00824009	0.00824009	0.00824009	0.00824009
R0766	0.00824009	0.00824009	0.00824009	0.00824009	0.00824009	0.00824009	0.00824009	0.00824009	0.00824009	0.00824009	0.00824009	0.00824009	0.00824009	0.00824009	0.00824009	0.00824009	0.00824009	0.00824009	0.00824009	0.00824009	0.00824009	0.00824009	0.00824009	0.00824009	0.00824009	0.00824009	0.00824009	0.00824009	0.00824009	0.00824009	0.00824009	0.00824009	0.00824009	0.00824009	0.00824009	0.00824009	0.00824009	0.00824009	0.00824009	0.00824009	0.00824009	0.00824009	0.00824009	0.00824009	0.00824009	0.00824009	0.00824009	0.00824009	0.00824009
R0767	0.00824009	0.00824009	0.00824009	0.00824009	0.00824009	0.00824009	0.00824009	0.00824009	0.00824009	0.00824009	0.00824009	0.00824009	0.00824009	0.00824009	0.00824009	0.00824009	0.00824009	0.00824009	0.00824009	0.00824009	0.00824009	0.00824009	0.00824009	0.00824009	0.00824009	0.00824009	0.00824009	0.00824009	0.00824009	0.00824009	0.00824009	0.00824009	0.00824009	0.00824009	0.00824009	0.00824009	0.00824009	0.00824009	0.00824009	0.00824009	0.00824009	0.00824009	0.00824009	0.00824009	0.00824009	0.00824009	0.00824009	0.00824009	0.00824009
R0768	3.09653e-20	3.09653e-20	3.09653e-20	3.09653e-20	3.09653e-20	3.09653e-20	3.09653e-20	3.09653e-20	3.09653e-20	3.09653e-20	3.09653e-20	3.09653e-20	3.09653e-20	3.09653e-20	3.09653e-20	3.09653e-20	3.09653e-20	3.09653e-20	3.09653e-20	3.09653e-20	3.09653e-20	3.09653e-20	3.09653e-20	3.09653e-20	3.09653e-20	3.09653e-20	3.09653e-20	3.09653e-20	3.09653e-20	3.09653e-20	3.09653e-20	3.09653e-20	3.09653e-20	3.09653e-20	3.09653e-20	3.09653e-20	3.09653e-20	3.09653e-20	3.09653e-20	3.09653e-20	3.09653e-20	3.09653e-20	3.09653e-20	3.09653e-20	3.09653e-20	3.09653e-20	3.09653e-20	3.09653e-20	3.09653e-20
R0769	0	0	0	0	0	0	0	0	0	0	0	0	0	0	0	0	0	0	0	0	0	0	0	0	0	0	0	0	0	0	0	0	0	0	0	0	0	0	0	0	0	0	0	0	0	0	0	0	0
R0770	0	0	0	0	0	0	0	0	0	0	0	0	0	0	0	0	0	0	0	0	0	0	0	0	0	0	0	0	0	0	0	0	0	0	0	0	0	0	0	0	0	0	0	0	0	0	0	0	0
R0771	668.849	668.849	668.849	668.849	668.849	668.847	668.849	668.849	668.849	668.849	668.849	668.849	668.849	668.849	668.849	668.849	668.849	668.849	668.849	668.849	668.849	668.484	668.849	668.849	668.849	668.847	668.849	668.849	668.849	668.849	668.847	668.849	668.849	668.849	668.849	668.849	668.849	668.849	668.849	668.849	668.849	668.849	668.849	668.849	668.849	668.849	668.849	668.849	668.849
R0772	0.00824009	0.00824009	0.00824009	0.00824009	0.00824009	0.00824009	0.00824009	0.00824009	0.00824009	0.00824009	0.00824009	0.00824009	0.00824009	0.00824009	0.00824009	0.00824009	0.00824009	0.00824009	0.00824009	0.00824009	0.00824009	0.00824009	0.00824009	0.00824009	0.00824009	0.00824009	0.00824009	0.00824009	0.00824009	0.00824009	0.00824009	0.00824009	0.00824009	0.00824009	0.00824009	0.00824009	0.00824009	0.00824009	0.00824009	0.00824009	0.00824009	0.00824009	0.00824009	0.00824009	0.00824009	0.00824009	0.00824009	0.00824009	0.00824009
R0773	668.84	668.84	668.84	668.84	668.84	668.839	668.84	668.84	668.84	668.84	668.84	668.84	668.84	668.84	668.84	668.84	668.84	668.84	668.84	668.84	668.84	668.476	668.84	668.84	668.84	668.839	668.84	668.84	668.84	668.84	668.839	668.84	668.84	668.84	668.84	668.84	668.84	668.84	668.84	668.84	668.84	668.84	668.84	668.84	668.84	668.84	668.84	668.84	668.84
R0774	668.84	668.84	668.84	668.84	668.84	668.839	668.84	668.84	668.84	668.84	668.84	668.84	668.84	668.84	668.84	668.84	668.84	668.84	668.84	668.84	668.84	668.476	668.84	668.84	668.84	668.839	668.84	668.84	668.84	668.84	668.839	668.84	668.84	668.84	668.84	668.84	668.84	668.84	668.84	668.84	668.84	668.84	668.84	668.84	668.84	668.84	668.84	668.84	668.84
R0775	0.000275403	0.000275403	0.000275403	0.000275403	0.000275403	0.000275402	0.000275403	0.000275403	0.000275403	0.000275403	0.000275402	0.000275403	0.000275403	0.000275403	0.000275403	0.000275403	0.000275403	0.000275403	0.000275403	0.000275403	0.000275403	0.000275403	0.000275403	0.000275402	0.000275402	0.000275403	0.000275402	0.000275403	0.000275403	0.000275403	0.000275403	0.000275403	0.000275403	0.000275403	0.000275403	0.000275403	0.000275403	0.000275403	0.000275403	0.000275403	0.000275403	0.000275402	0.000275402	0.000275403	0.000275403	0.000275403	0.000275403	0.000275403	0.000275402
R0777	0	0	0	0	0	0	0	0	0	0	0	0	0	0	0	0	0	0	0	0	0	0	0	0	0	0	0	0	0	0	0	0	0	0	0	0	0	0	0	0	0	0	0	0	0	0	0	0	0
R0778	0.000275403	0.000275403	0.000275403	0.000275403	0.000275403	0.000275402	0.000275403	0.000275403	0.000275403	0.000275403	0.000275402	0.000275403	0.000275403	0.000275403	0.000275403	0.000275403	0.000275403	0.000275403	0.000275403	0.000275403	0.000275403	0.000275403	0.000275403	0.000275402	0.000275402	0.000275403	0.000275402	0.000275403	0.000275403	0.000275403	0.000275403	0.000275403	0.000275403	0.000275403	0.000275403	0.000275403	0.000275403	0.000275403	0.000275403	0.000275403	0.000275403	0.000275402	0.000275402	0.000275403	0.000275403	0.000275403	0.000275403	0.000275403	0.000275402
R0779	682.992	682.992	682.992	682.992	682.992	682.99	682.992	682.992	682.992	682.992	682.992	682.992	682.992	682.992	682.992	682.992	682.992	682.992	682.992	682.992	682.992	682.627	682.992	682.992	682.992	682.99	682.992	682.992	682.992	682.992	682.99	682.992	682.992	682.992	682.992	682.992	682.992	682.992	682.992	682.992	682.992	682.992	682.992	682.992	682.992	682.992	682.992	682.992	682.992
R0780	0.0400838	0.0400838	0.0400838	0.0400838	0.0400838	0.0400838	0.0400838	0.0400838	0.0400838	0.0400838	0.0400838	0.0400838	0.0400838	0.0400838	0.0400838	0.0400838	0.0400838	0.0400838	0.0400838	0.0400838	0.0400838	0.0400838	0.0400838	0.0400838	0.0400838	0.0400838	0.0400838	0.0400838	0.0400838	0.0400838	0.0400838	0.0400838	0.0400838	0.0400838	0.0400838	0.0400838	0.0400838	0.0400838	0.0400838	0.0400838	0.0400838	0.0400838	0.0400838	0.0400838	0.0400838	0.0400838	0.0400838	0.0400838	0.0400838
R0781	668.84	668.84	668.84	668.84	668.84	668.839	668.84	668.84	668.84	668.84	668.84	668.84	668.84	668.84	668.84	668.84	668.84	668.84	668.84	668.84	668.84	668.476	668.84	668.84	668.84	668.839	668.84	668.84	668.84	668.84	668.839	668.84	668.84	668.84	668.84	668.84	668.84	668.84	668.84	668.84	668.84	668.84	668.84	668.84	668.84	668.84	668.84	668.84	668.84
R0782	0.0400838	0.0400838	0.0400838	0.0400838	0.0400838	0.0400838	0.0400838	0.0400838	0.0400838	0.0400838	0.0400838	0.0400838	0.0400838	0.0400838	0.0400838	0.0400838	0.0400838	0.0400838	0.0400838	0.0400838	0.0400838	0.0400838	0.0400838	0.0400838	0.0400838	0.0400838	0.0400838	0.0400838	0.0400838	0.0400838	0.0400838	0.0400838	0.0400838	0.0400838	0.0400838	0.0400838	0.0400838	0.0400838	0.0400838	0.0400838	0.0400838	0.0400838	0.0400838	0.0400838	0.0400838	0.0400838	0.0400838	0.0400838	0.0400838
R0783	-0.00742066	-0.00742066	-0.00742066	-0.00742066	-0.00742066	-0.00742066	-0.00742066	-0.00742066	-0.00742066	-0.00742066	-0.00742066	-0.00742066	-0.00742066	-0.00742066	-0.00742066	-0.00742066	-0.00742066	-0.00742066	-0.00742066	-0.00742066	-0.00742066	-0.00742066	-0.00742066	-0.00742066	-0.00742066	-0.00742066	-0.00742066	-0.00742066	-0.00742066	-0.00742066	-0.00742066	-0.00742066	-0.00742066	-0.00742066	-0.00742066	-0.00742066	-0.00742066	-0.00742066	-0.00742066	-0.00742066	-0.00742066	-0.00742066	-0.00742066	-0.00742066	-0.00742066	-0.00742066	-0.00742066	-0.00742066	-0.00742066
R0784	0	0	0	0	0	0	0	0	0	0	0	0	0	0	0	0	0	0	0	0	0	0	1.08652e-27	0	0	0	0	0	0	0	0	0	0	0	0	0	0	0	0	0	0	0	0	0	0	0	0	0	0
R0785	36.8564	36.8564	36.8564	36.8564	36.8564	36.8564	36.8564	36.8564	36.8564	36.8564	36.8564	36.8564	36.8564	36.8564	36.8564	36.8564	36.8564	36.8564	36.8564	36.8564	36.8564	36.8564	36.8564	36.8564	36.8564	36.8564	36.8564	36.8564	36.8564	36.8564	36.8564	36.8564	36.8564	36.8564	36.8564	36.8564	36.8564	36.8564	36.8564	36.8564	36.8564	36.8564	36.8564	36.8564	36.8564	36.8564	36.8564	36.8564	36.8564
R0786	1000	1000	1000	1000	1000	1000	1000	1000	1000	1000	1000	1000	1000	1000	1000	1000	1000	1000	1000	1000	1000	1000	1000	1000	1000	1000	1000	1000	1000	1000	1000	1000	1000	1000	1000	1000	1000	1000	1000	1000	1000	1000	1000	1000	1000	1000	1000	1000	1000
R0787	0.0400838	0.0400838	0.0400838	0.0400838	0.0400838	0.0400838	0.0400838	0.0400838	0.0400838	0.0400838	0.0400838	0.0400838	0.0400838	0.0400838	0.0400838	0.0400838	0.0400838	0.0400838	0.0400838	0.0400838	0.0400838	0.0400838	0.0400838	0.0400838	0.0400838	0.0400838	0.0400838	0.0400838	0.0400838	0.0400838	0.0400838	0.0400838	0.0400838	0.0400838	0.0400838	0.0400838	0.0400838	0.0400838	0.0400838	0.0400838	0.0400838	0.0400838	0.0400838	0.0400838	0.0400838	0.0400838	0.0400838	0.0400838	0.0400838
R0788	0.000314746	0.000314746	0.000314746	0.000314746	0.000314746	0.000314746	0.000314746	0.000314746	0.000314746	0.000314746	0.000314746	0.000314746	0.000314746	0.000314746	0.000314746	0.000314746	0.000314746	0.000314746	0.000314746	0.000314746	0.000314746	0.000314746	0.000314746	0.000314746	0.000314746	0.000314746	0.000314746	0.000314746	0.000314746	0.000314746	0.000314746	0.000314746	0.000314746	0.000314746	0.000314746	0.000314746	0.000314746	0.000314746	0.000314746	0.000314746	0.000314746	0.000314746	0.000314746	0.000314746	0.000314746	0.000314746	0.000314746	0.000314746	0.000314746
R0789	1000	1000	1000	1000	1000	1000	1000	1000	1000	1000	1000	1000	1000	1000	1000	1000	1000	1000	1000	1000	1000	1000	1000	1000	1000	1000	1000	1000	1000	1000	1000	1000	1000	1000	1000	1000	1000	1000	1000	1000	1000	1000	1000	1000	1000	1000	1000	1000	1000
R0790	0	0	0	0	0	0	0	0	0	0	0	0	0	0	0	0	0	0	0	0	0	0	0	0	0	0	0	0	0	0	0	0	0	0	0	0	0	0	0	0	0	0	0	0	0	0	0	0	0
R0791	0	0	0	0	0	0	0	0	0	0	0	0	0	0	0	0	0	0	0	0	0	0	0	0	0	0	0	0	0	0	0	0	0	0	0	0	0	0	0	0	0	0	0	0	0	0	0	0	0
R0792	0	0	0	0	0	0	0	0	0	0	0	0	0	0	0	0	0	0	0	0	0	0	0	0	0	0	0	0	0	0	0	0	0	0	0	0	0	0	0	0	0	0	0	0	0	0	0	0	0
R0793	0.000489604	0.000489604	0.000489604	0.000489604	0.000489604	0.000489604	0.000489604	0.000489604	0.000489604	0.000489604	0.000489604	0.000489604	0.000489604	0.000489604	0.000489604	0.000489604	0.000163201	0.000489604	0.000489604	0.000489604	0.000163201	0.000489604	0.000489604	0.000489604	0.000489604	0.000489604	0.000489604	0.000489604	0.000489604	0.000163201	0.000489604	0.000489604	0.000489604	0.000489604	0.000489604	0.000489604	0.000489604	0.000489604	0.000489604	0.000489604	0.000489604	0.000489604	0.000489604	0.000489604	0.000489604	0.000489604	0.000489604	0.000489604	0.000489604
R0794	0	0	0	0	0	0	0	0	0	0	0	0	0	0	0	0	0	0	0	0	0	0	0	0	0	0	0	0	0	0	0	0	0	0	0	0	0	0	0	0	0	0	0	0	0	0	0	0	0
R0795	0.00220322	0.00220322	0.00220322	0.00220322	0.00220322	0.00220322	0.00220322	0.00220322	0.00220322	0.00220322	0.00220322	0.00220322	0.00220322	0.00220322	0.00220322	0.00220322	0.00220322	0.00220322	0.00220322	0.00220322	0.00220322	0.00220322	0.00220322	0.00220322	0.00220322	0.00220322	0.00220322	0.00220322	0.00220322	0.00220322	0.00220322	0.00220322	0.00220322	0.00220322	0.00220322	0.00220322	0.00220322	0.00220322	0.00220322	0.00220322	0.00220322	0.00220322	0.00220322	0.00220322	0.00220322	0.00220322	0.00220322	0.00220322	0.00220322
R0796	0	0	0	0	0	0	0	0	0	0	0	0	0	0	0	0	0	0	0	0	0	0	0	0	0	0	0	0	0	0	0	0	0	0	0	0	0	0	0	0	0	0	0	0	0	0	0	0	0
R0797	0	0	0	0	0	0	0	0	0	0	0	0	0	0	0	0	0	0	0	0	0	0	0	0	0	0	0	0	0	0	0	0	0	0	0	0	0	0	0	0	0	0	0	0	0	0	0	0	0
R0798	0	0	0	0	0	0	0	0	0	0	0	0	0	0	0	0	0	0	0	0	0	0	0	0	0	0	0	0	0	0	0	0	0	0	0	0	0	0	0	0	0	0	0	0	0	0	0	0	0
R0799	0	0	0	0	0	0	0	0	0	0	0	0	0	0	0	0	0	0	0	0	0	0	0	0	0	0	0	0	0	0	0	0	0	0	0	0	0	0	0	0	0	0	0	0	0	0	0	0	0
R0800	0	0	0	0	0	0	0	0	0	0	0	0	0	0	0	0	0	0	0	0	0	0	0	0	0	0	0	0	0	0	0	0	0	0	0	0	0	0	0	0	0	0	0	0	0	0	0	0	0
R0801	0	0	0	0	0	0	0	0	0	0	0	0	0	0	0	0	0	0	0	0	0	0	0	0	0	0	0	0	0	0	0	0	0	0	0	0	0	0	0	0	0	0	0	0	0	0	0	0	0
R0802	0	0	0	0	0	0	0	0	0	0	0	0	0	0	0	0	0	0	0	0	0	0	0	0	0	0	0	0	0	0	0	0	0	0	0	0	0	0	0	0	0	0	0	0	0	0	0	0	0
R0803	0	0	0	0	0	0	0	0	0	0	0	0	0	0	0	0	0	0	0	0	0	0	0	0	0	0	0	0	0	0	0	0	0	0	0	0	0	0	0	0	0	0	0	0	0	0	0	0	0
R0804	8.16007e-05	8.16007e-05	8.16007e-05	8.16007e-05	8.16007e-05	8.16007e-05	8.16007e-05	8.16007e-05	8.16007e-05	8.16007e-05	8.16007e-05	8.16007e-05	8.16007e-05	8.16007e-05	8.16007e-05	8.16007e-05	8.16007e-05	8.16007e-05	8.16007e-05	8.16007e-05	8.16007e-05	8.16007e-05	8.16007e-05	8.16007e-05	8.16007e-05	8.16007e-05	8.16007e-05	8.16007e-05	8.16007e-05	8.16007e-05	8.16007e-05	8.16007e-05	8.16007e-05	8.16007e-05	8.16007e-05	8.16007e-05	8.16007e-05	8.16007e-05	8.16007e-05	8.16007e-05	8.16007e-05	8.16007e-05	8.16007e-05	8.16007e-05	8.16007e-05	8.16007e-05	8.16007e-05	8.16007e-05	8.16007e-05
R0805	8.16007e-05	8.16007e-05	8.16007e-05	8.16007e-05	8.16007e-05	8.16007e-05	8.16007e-05	8.16007e-05	8.16007e-05	8.16007e-05	8.16007e-05	8.16007e-05	8.16007e-05	8.16007e-05	8.16007e-05	8.16007e-05	8.16007e-05	8.16007e-05	8.16007e-05	8.16007e-05	8.16007e-05	8.16007e-05	8.16007e-05	8.16007e-05	8.16007e-05	8.16007e-05	8.16007e-05	8.16007e-05	8.16007e-05	8.16007e-05	8.16007e-05	8.16007e-05	8.16007e-05	8.16007e-05	8.16007e-05	8.16007e-05	8.16007e-05	8.16007e-05	8.16007e-05	8.16007e-05	8.16007e-05	8.16007e-05	8.16007e-05	8.16007e-05	8.16007e-05	8.16007e-05	8.16007e-05	8.16007e-05	8.16007e-05
R0806	8.16007e-05	8.16007e-05	8.16007e-05	8.16007e-05	8.16007e-05	8.16007e-05	8.16007e-05	8.16007e-05	8.16007e-05	8.16007e-05	8.16007e-05	8.16007e-05	8.16007e-05	8.16007e-05	8.16007e-05	8.16007e-05	8.16007e-05	8.16007e-05	8.16007e-05	8.16007e-05	8.16007e-05	8.16007e-05	8.16007e-05	8.16007e-05	8.16007e-05	8.16007e-05	8.16007e-05	8.16007e-05	8.16007e-05	8.16007e-05	8.16007e-05	8.16007e-05	8.16007e-05	8.16007e-05	8.16007e-05	8.16007e-05	8.16007e-05	8.16007e-05	8.16007e-05	8.16007e-05	8.16007e-05	8.16007e-05	8.16007e-05	8.16007e-05	8.16007e-05	8.16007e-05	8.16007e-05	8.16007e-05	8.16007e-05
R0807	8.16007e-05	8.16007e-05	8.16007e-05	8.16007e-05	8.16007e-05	8.16007e-05	8.16007e-05	8.16007e-05	8.16007e-05	8.16007e-05	8.16007e-05	8.16007e-05	8.16007e-05	8.16007e-05	8.16007e-05	8.16007e-05	8.16007e-05	8.16007e-05	8.16007e-05	8.16007e-05	8.16007e-05	8.16007e-05	8.16007e-05	8.16007e-05	8.16007e-05	8.16007e-05	8.16007e-05	8.16007e-05	8.16007e-05	8.16007e-05	8.16007e-05	8.16007e-05	8.16007e-05	8.16007e-05	8.16007e-05	8.16007e-05	8.16007e-05	8.16007e-05	8.16007e-05	8.16007e-05	8.16007e-05	8.16007e-05	8.16007e-05	8.16007e-05	8.16007e-05	8.16007e-05	8.16007e-05	8.16007e-05	8.16007e-05
R0809	0	0	0	0	0	0	0	0	0	0	0	0	0	0	0	0	0	0	0	0	0	0	0	0	0	0	0	0	0	0	0	0	0	0	0	0	0	0	0	0	0	0	0	0	0	0	0	0	0
R0810	0.000100146	0.000100146	0.000100146	0.000100146	0.000100146	0.000100146	0.000100146	0.000100146	0.000100146	0.000100146	0.000100146	0.000100146	0.000100146	0.000100146	0.000100146	0.000100146	0.000100146	0.000100146	0.000100146	0.000100146	0.000100146	0.000100146	0.000100146	0.000100146	0.000100146	0.000100146	0.000100146	0.000100146	0.000100146	0.000100146	0.000100146	0.000100146	0.000100146	0.000100146	0.000100146	0.000100146	0.000100146	0.000100146	0.000100146	0.000100146	0.000100146	0.000100146	0.000100146	0.000100146	0.000100146	0.000100146	0.000100146	0.000100146	0.000100146
R0813	0	0	0	0	0	0	0	0	0	0	0	0	0	0	0	0	0	0	0	0	0	0	0	0	0	0	0	0	0	0	0	0	0	0	0	0	0	0	0	0	0	0	0	0	0	0	0	0	0
R0814	0	0	0	0	0	0	0	0	0	0	0	0	0	0	0	0	0	0	0	0	0	0	0	0	0	0	0	0	0	0	0	0	0	0	0	0	0	0	0	0	0	0	0	0	0	0	0	0	0
R0815	0	0	0	0	0	0	0	0	0	0	0	0	0	0	0	0	0	0	0	0	0	0	0	0	0	0	0	0	0	0	0	0	0	0	0	0	0	0	0	0	0	0	0	0	0	0	0	0	0
R0816	0	0	0	0	0	0	0	0	0	0	0	0	0	0	0	0	0	0	0	0	0	0	0	0	0	0	0	0	0	0	0	0	0	0	0	0	0	0	0	0	0	0	0	0	0	0	0	0	0
R0817	0	0	0	0	0	0	0	0	0	0	0	0	0	0	0	0	0	0	0	0	0	0	0	0	0	0	0	0	0	0	0	0	0	0	0	0	0	0	0	0	0	0	0	0	0	0	0	0	0
R0821	0	0	0	0	0	0	0	0	0	0	0	0	0	0	0	0	0	0	0	0	0	0	0	0	0	0	0	0	0	0	0	0	0	0	0	0	0	0	0	0	0	0	0	0	0	0	0	0	0
R0823	0	0	0	0	0	0	0	0	0	0	0	0	0	0	0	0	0	0	0	0	0	0	0	0	0	0	0	0	0	0	0	0	0	0	0	0	0	0	0	0	0	0	0	0	0	0	0	0	0
R0827	0	0	0	0	0	0	0	0	0	0	0	0	0	0	0	0	0	0	0	0	0	0	0	0	0	0	0	0	0	0	0	0	0	0	0	0	0	0	0	0	0	0	0	0	0	0	0	0	0
R0829	0.000550805	0.000550805	0.000550805	0.000550805	0.000550805	0.000550805	0.000550805	0.000550805	0.000550805	0.000550805	0.000550805	0.000550805	0.000550805	0.000550805	0.000550805	0.000550805	0.000550805	0.000550805	0.000550805	0.000550805	0.000550805	0.000550805	0.000550805	0.000550805	0.000550805	0.000550805	0.000550805	0.000550805	0.000550805	0.000550805	0.000550805	0.000550805	0.000550805	0.000550805	0.000550805	0.000550805	0.000550805	0.000550805	0.000550805	0.000550805	0.000550805	0.000550805	0.000550805	0.000550805	0.000550805	0.000550805	0.000550805	0.000550805	0.000550805
R0834	455.083	455.083	455.083	455.083	455.083	455.079	455.083	455.083	455.083	455.083	455.083	455.083	455.083	455.083	455.083	455.083	455.083	455.083	455.083	455.083	455.083	454.809	455.083	455.083	455.083	455.079	455.083	455.083	455.083	455.083	455.079	455.083	455.083	455.083	455.083	455.083	455.083	455.083	453.435	455.083	455.083	455.083	455.083	455.083	455.083	455.083	455.083	455.083	455.083
R0835	1000	1000	1000	1000	1000	1000	1000	1000	1000	1000	1000	1000	1000	1000	1000	1000	1000	1000	1000	1000	1000	1000	1000	1000	1000	1000	1000	1000	1000	1000	1000	1000	1000	1000	1000	1000	1000	1000	1000	1000	1000	1000	1000	1000	1000	1000	1000	1000	1000
R0836	0	0	0	0	0	0	0	0	0	0	0	0	0	0	0	0	0	0	0	0	0	0	0	0	0	0	0	0	0	0	0	0	0	0	0	0	0	0	0	0	0	0	0	0	0	0	0	0	0
R0837	0	0	0	0	0	0	0	0	0	0	0	0	0	0	0	0	0	0	0	0	0	0	0	0	0	0	0	0	0	0	0	0	0	0	0	0	0	0	0	0	0	0	0	0	0	0	0	0	0
R0848	36.8768	36.8768	36.8768	36.8768	36.8768	36.8768	36.8768	36.8768	36.8768	36.8768	36.8768	36.8768	36.8768	36.8768	36.8768	36.8768	36.8768	36.8768	36.8768	36.8768	36.8768	36.8768	36.8768	36.8768	36.8768	36.8768	36.8768	36.8768	36.8768	36.8768	36.8768	36.8768	36.8768	36.8768	36.8768	36.8768	36.8768	36.8768	36.8768	36.8768	36.8768	36.8768	36.8768	36.8768	36.8768	36.8768	36.8768	36.8768	36.8768
R0849	-0.0117828	-0.0117828	-0.0117828	-0.0117828	-0.0117828	-0.0117828	-0.0117828	-0.0117828	-0.0117828	-0.0117828	-0.0117828	-0.0117828	-0.0117828	-0.0117828	-0.0117828	-0.0117828	-0.0117828	-0.0117828	-0.0117828	-0.0117828	-0.0117828	-0.0117828	-0.0117828	-0.0117828	-0.0117828	-0.0117828	-0.0117828	-0.0117828	-0.0117828	-0.0117828	-0.0117828	-0.0117828	-0.0117828	-0.0117828	-0.0117828	-0.0117828	-0.0117828	-0.0117828	-0.0117828	-0.0117828	-0.0117828	-0.0117828	-0.0117828	-0.0117828	-0.0117828	-0.0117828	-0.0117828	-0.0117828	-0.0117828
R0850	0.0119296	0.0119296	0.0119296	0.0119296	0.0119296	0.0119296	0.0119296	0.0119296	0.0119296	0.0119296	0.0119296	0.0119296	0.0119296	0.0119296	0.0119296	0.0119296	0.0119296	0.0119296	0.0119296	0.0119296	0.0119296	0.0119296	0.0119296	0.0119296	0.0119296	0.0119296	0.0119296	0.0119296	0.0119296	0.0119296	0.0119296	0.0119296	0.0119296	0.0119296	0.0119296	0.0119296	0.0119296	0.0119296	0.0119296	0.0119296	0.0119296	0.0119296	0.0119296	0.0119296	0.0119296	0.0119296	0.0119296	0.0119296	0.0119296
R0851	-0.0026779	-0.0026779	-0.0026779	-0.0026779	-0.0026779	-0.0026779	-0.0026779	-0.0026779	-0.0026779	-0.0026779	-0.0026779	-0.0026779	-0.0026779	-0.0026779	-0.0026779	-0.0026779	-0.0026779	-0.0026779	-0.0026779	-0.0026779	-0.0026779	-0.0026779	-0.0026779	-0.0026779	-0.0026779	-0.0026779	-0.0026779	-0.0026779	-0.0026779	-0.0026779	-0.0026779	-0.0026779	-0.0026779	-0.0026779	-0.0026779	-0.0026779	-0.0026779	-0.0026779	-0.0026779	-0.0026779	-0.0026779	-0.0026779	-0.0026779	-0.0026779	-0.0026779	-0.0026779	-0.0026779	-0.0026779	-0.0026779
R0852	-0.00589138	-0.00589138	-0.00589138	-0.00589138	-0.00589138	-0.00589138	-0.00589138	-0.00589138	-0.00589138	-0.00589138	-0.00589138	-0.00589138	-0.00589138	-0.00589138	-0.00589138	-0.00589138	-0.00589138	-0.00589138	-0.00589138	-0.00589138	-0.00589138	-0.00589138	-0.00589138	-0.00589138	-0.00589138	-0.00589138	-0.00589138	-0.00589138	-0.00589138	-0.00589138	-0.00589138	-0.00589138	-0.00589138	-0.00589138	-0.00589138	-0.00589138	-0.00589138	-0.00589138	-0.00589138	-0.00589138	-0.00589138	-0.00589138	-0.00589138	-0.00589138	-0.00589138	-0.00589138	-0.00589138	-0.00589138	-0.00589138
R0853	0	0	0	0	0	0	0	0	0	0	0	0	0	0	0	0	0	0	0	0	0	0	0	0	0	0	0	0	0	0	0	0	0	0	0	0	0	0	0	0	0	0	0	0	0	0	0	0	0
R0854	0	0	0	0	0	0	0	0	0	0	0	0	0	0	0	0	0	0	0	0	0	0	0	0	0	0	0	0	0	0	0	0	0	0	0	0	0	0	0	0	0	0	0	0	0	0	0	0	0
R0855	0	0	0	0	0	0	0	0	0	0	0	0	0	0	0	0	0	0	0	0	0	0	0	0	0	0	0	0	0	0	0	0	0	0	0	0	0	0	0	0	0	0	0	0	0	0	0	0	0
R0856	0	0	0	0	0	0	0	0	0	0	0	0	0	0	0	0	0	0	0	0	0	0	0	0	0	0	0	0	0	0	0	0	0	0	0	0	0	0	0	0	0	0	0	0	0	0	0	0	0
R0857	0	0	0	0	0	0	0	0	0	0	0	0	0	0	0	0	0	0	0	0	0	0	0	0	0	0	0	0	0	0	0	0	0	0	0	0	0	0	0	0	0	0	0	0	0	0	0	0	0
R0858	0	0	0	0	0	0	0	0	0	0	0	0	0	0	0	0	0	0	0	0	0	0	0	0	0	0	0	0	0	0	0	0	0	0	0	0	0	0	0	0	0	0	0	0	0	0	0	0	0
R0859	0.0119296	0.0119296	0.0119296	0.0119296	0.0119296	0.0119296	0.0119296	0.0119296	0.0119296	0.0119296	0.0119296	0.0119296	0.0119296	0.0119296	0.0119296	0.0119296	0.0119296	0.0119296	0.0119296	0.0119296	0.0119296	0.0119296	0.0119296	0.0119296	0.0119296	0.0119296	0.0119296	0.0119296	0.0119296	0.0119296	0.0119296	0.0119296	0.0119296	0.0119296	0.0119296	0.0119296	0.0119296	0.0119296	0.0119296	0.0119296	0.0119296	0.0119296	0.0119296	0.0119296	0.0119296	0.0119296	0.0119296	0.0119296	0.0119296
R0860	0.0146443	0.0146443	0.0146443	0.0146443	0.0146443	0.0146443	0.0146443	0.0146443	0.0146443	0.0146443	0.0146443	0.0146443	0.0146443	0.0146443	0.0146443	0.0146443	0.0146443	0.0146443	0.0146443	0.0146443	0.0146443	0.0146443	0.0146443	0.0146443	0.0146443	0.0146443	0.0146443	0.0146443	0.0146443	0.0146443	0.0146443	0.0146443	0.0146443	0.0146443	0.0146443	0.0146443	0.0146443	0.0146443	0.0146443	0.0146443	0.0146443	0.0146443	0.0146443	0.0146443	0.0146443	0.0146443	0.0146443	0.0146443	0.0146443
R0861	0.0146443	0.0146443	0.0146443	0.0146443	0.0146443	0.0146443	0.0146443	0.0146443	0.0146443	0.0146443	0.0146443	0.0146443	0.0146443	0.0146443	0.0146443	0.0146443	0.0146443	0.0146443	0.0146443	0.0146443	0.0146443	0.0146443	0.0146443	0.0146443	0.0146443	0.0146443	0.0146443	0.0146443	0.0146443	0.0146443	0.0146443	0.0146443	0.0146443	0.0146443	0.0146443	0.0146443	0.0146443	0.0146443	0.0146443	0.0146443	0.0146443	0.0146443	0.0146443	0.0146443	0.0146443	0.0146443	0.0146443	0.0146443	0.0146443
R0862	0.00604875	0.00604875	0.00604875	0.00604875	0.00604875	0.00604875	0.00604875	0.00604875	0.00604875	0.00604875	0.00604875	0.00604875	0.00604875	0.00604875	0.00604875	0.00604875	0.00604875	0.00604875	0.00604875	0.00604875	0.00604875	0.00604875	0.00604875	0.00604875	0.00604875	0.00604875	0.00604875	0.00604875	0.00604875	0.00604875	0.00604875	0.00604875	0.00604875	0.00604875	0.00604875	0.00604875	0.00604875	0.00604875	0.00604875	0.00604875	0.00604875	0.00604875	0.00604875	0.00604875	0.00604875	0.00604875	0.00604875	0.00604875	0.00604875
R0863	-0.00589138	-0.00589138	-0.00589138	-0.00589138	-0.00589138	-0.00589138	-0.00589138	-0.00589138	-0.00589138	-0.00589138	-0.00589138	-0.00589138	-0.00589138	-0.00589138	-0.00589138	-0.00589138	-0.00589138	-0.00589138	-0.00589138	-0.00589138	-0.00589138	-0.00589138	-0.00589138	-0.00589138	-0.00589138	-0.00589138	-0.00589138	-0.00589138	-0.00589138	-0.00589138	-0.00589138	-0.00589138	-0.00589138	-0.00589138	-0.00589138	-0.00589138	-0.00589138	-0.00589138	-0.00589138	-0.00589138	-0.00589138	-0.00589138	-0.00589138	-0.00589138	-0.00589138	-0.00589138	-0.00589138	-0.00589138	-0.00589138
R0864	0.00604875	0.00604875	0.00604875	0.00604875	0.00604875	0.00604875	0.00604875	0.00604875	0.00604875	0.00604875	0.00604875	0.00604875	0.00604875	0.00604875	0.00604875	0.00604875	0.00604875	0.00604875	0.00604875	0.00604875	0.00604875	0.00604875	0.00604875	0.00604875	0.00604875	0.00604875	0.00604875	0.00604875	0.00604875	0.00604875	0.00604875	0.00604875	0.00604875	0.00604875	0.00604875	0.00604875	0.00604875	0.00604875	0.00604875	0.00604875	0.00604875	0.00604875	0.00604875	0.00604875	0.00604875	0.00604875	0.00604875	0.00604875	0.00604875
R0865	-0.0144607	-0.0144607	-0.0144607	-0.0144607	-0.0144607	-0.0144607	-0.0144607	-0.0144607	-0.0144607	-0.0144607	-0.0144607	-0.0144607	-0.0144607	-0.0144607	-0.0144607	-0.0144607	-0.0144607	-0.0144607	-0.0144607	-0.0144607	-0.0144607	-0.0144607	-0.0144607	-0.0144607	-0.0144607	-0.0144607	-0.0144607	-0.0144607	-0.0144607	-0.0144607	-0.0144607	-0.0144607	-0.0144607	-0.0144607	-0.0144607	-0.0144607	-0.0144607	-0.0144607	-0.0144607	-0.0144607	-0.0144607	-0.0144607	-0.0144607	-0.0144607	-0.0144607	-0.0144607	-0.0144607	-0.0144607	-0.0144607
R0866	0.0119296	0.0119296	0.0119296	0.0119296	0.0119296	0.0119296	0.0119296	0.0119296	0.0119296	0.0119296	0.0119296	0.0119296	0.0119296	0.0119296	0.0119296	0.0119296	0.0119296	0.0119296	0.0119296	0.0119296	0.0119296	0.0119296	0.0119296	0.0119296	0.0119296	0.0119296	0.0119296	0.0119296	0.0119296	0.0119296	0.0119296	0.0119296	0.0119296	0.0119296	0.0119296	0.0119296	0.0119296	0.0119296	0.0119296	0.0119296	0.0119296	0.0119296	0.0119296	0.0119296	0.0119296	0.0119296	0.0119296	0.0119296	0.0119296
R0867	0	0	0	0	0	0	3.68223e-29	0	0	0	0	0	0	0	0	0	0	0	0	0	0	0	0	0	0	0	0	0	0	0	0	0	0	0	0	0	0	0	0	0	0	0	0	0	0	0	0	0	0
R0868	1000	1000	1000	1000	1000	1000	1000	1000	1000	1000	1000	1000	1000	1000	1000	1000	1000	1000	1000	1000	1000	1000	1000	1000	1000	1000	1000	1000	1000	1000	1000	1000	1000	1000	1000	1000	1000	1000	1000	1000	1000	1000	1000	1000	1000	1000	1000	1000	1000
R0869	0	0	0	0	0	0	0	0	0	0	0	0	0	0	0	0	0	0	0	0	0	0	0	0	0	0	0	0	0	0	0	0	0	0	0	0	0	0	0	0	0	0	0	0	0	0	0	0	0
R0876	0	0	0	0	0	0	0	0	0	0	0	0	0	0	0	0	0	0	0	0	0	0	0	0	0	0	0	0	0	0	0	0	0	0	0	0	0	0	0	0	0	0	0	0	0	0	0	0	0
R0877	0	0	0	0	0	0	0	0	0	0	0	0	0	0	0	0	0	0	0	0	0	0	0	0	0	0	0	0	0	0	0	0	0	0	0	0	0	0	0	0	0	0	0	0	0	0	0	0	0
R0878	0	0	0	0	0	0	4.20599e-29	0	0	0	0	0	0	0	0	0	0	0	0	0	0	0	0	0	0	0	0	0	0	0	0	0	0	0	0	0	0	0	0	0	0	0	0	0	0	0	0	0	0
R0879	0	0	0	0	0	0	0	0	0	0	0	0	0	0	0	0	0	0	0	0	0	0	0	0	0	0	0	0	0	0	0	0	0	0	0	0	0	0	0	0	0	0	0	0	0	0	0	0	0
R0880	0	0	0	0	0	0	0	0	0	0	0	0	0	0	0	0	0	0	0	0	0	0	0	0	0	0	0	0	0	0	0	0	0	0	0	0	0	0	0	0	0	0	0	0	0	0	0	0	0
R0883	0	0	0	0	0	0	0	0	0	0	0	0	0	0	0	0	0	0	0	0	0	0	0	0	0	0	0	0	0	0	0	0	0	0	0	0	0	0	0	0	0	0	0	0	0	0	0	0	0
R0884	0	0	0	0	0	0	4.54938e-29	0	0	0	0	0	0	0	0	0	0	0	0	0	0	0	0	0	0	0	0	0	0	0	0	0	0	0	0	0	0	0	0	0	0	0	0	0	0	0	0	0	0
R0885	0	0	0	0	0	0	0	0	0	0	0	0	0	0	0	0	0	0	0	0	0	0	0	0	0	0	0	0	0	0	0	0	0	0	0	0	0	0	0	0	0	0	0	0	0	0	0	0	0
R0887	105.613	105.613	105.613	105.613	105.613	105.613	105.613	105.613	105.613	105.613	105.613	105.613	105.613	105.613	105.613	105.613	105.613	105.613	105.613	105.613	105.613	105.555	105.613	105.613	105.613	105.613	105.613	105.613	105.613	105.613	105.613	105.613	105.613	105.613	105.613	105.613	105.613	105.613	105.613	105.613	105.613	87.2465	105.613	105.613	105.613	105.613	105.613	105.613	105.613
R0888	0.000244802	0.000244802	0.000244802	0.000244802	0.000244802	0.000244802	0.000244802	0.000244802	0.000244802	0.000244802	0.000244802	0.000244802	0.000244802	0.000244802	0.000244802	0.000244802	0	0.000244802	0.000244802	0.000244802	0	0.000244802	0.000244802	0.000244802	0.000244802	0.000244802	0.000244802	0.000244802	0.000244802	0	0.000244802	0.000244802	0.000244802	0.000244802	0.000244802	0.000244802	0.000244802	0.000244802	0.000244802	0.000244802	0.000244802	0.000244802	0.000244802	0.000244802	0.000244802	0.000244802	0.000244802	0.000244802	0.000244802
R0889	0.000314746	0.000314746	0.000314746	0.000314746	0.000314746	0.000314746	0.000314746	0.000314746	0.000314746	0.000314746	0.000314746	0.000314746	0.000314746	0.000314746	0.000314746	0.000314746	0.000314746	0.000314746	0.000314746	0.000314746	0.000314746	0.000314746	0.000314746	0.000314746	0.000314746	0.000314746	0.000314746	0.000314746	0.000314746	0.000314746	0.000314746	0.000314746	0.000314746	0.000314746	0.000314746	0.000314746	0.000314746	0.000314746	0.000314746	0.000314746	0.000314746	0.000314746	0.000314746	0.000314746	0.000314746	0.000314746	0.000314746	0.000314746	0.000314746
R0890	1.09291e-13	1.09291e-13	1.09291e-13	1.09291e-13	0	-5.89098e-14	0	1.09291e-13	1.09291e-13	1.09291e-13	-7.23019e-14	1.09291e-13	0	-1.85938e-13	1.09291e-13	1.09291e-13	-5.96784e-14	1.09291e-13	-5.77399e-14	1.09291e-13	-5.96784e-14	-2.0768e-14	-1.21279e-13	-1.03502e-13	4.40829e-15	-3.69314e-14	-6.75052e-14	1.15968e-13	1.09291e-13	4.79455e-14	-3.69314e-14	1.09291e-13	1.09291e-13	-1.85938e-13	1.09291e-13	1.09291e-13	1.09291e-13	1.09291e-13	-3.43711e-14	1.09291e-13	1.09291e-13	1.83055e-14	-1.94377e-13	1.09291e-13	1.09291e-13	1.09291e-13	-1.85938e-13	1.50829e-17	-1.09398e-13
R0891	0.000157373	0.000157373	0.000157373	0.000157373	0.000157373	0.000157373	0	0.000157373	0.000157373	0.000157373	0.000157373	0.000157373	0.000157373	0.000157373	0.000157373	0.000157373	0.000157373	0.000157373	0.000157373	0.000157373	0.000157373	0.000157373	0.000157373	0.000157373	0.000157373	0.000157373	0.000157373	0.000157373	0.000157373	0.000157373	0.000157373	0.000157373	0.000157373	0.000157373	0.000157373	0.000157373	0.000157373	0.000157373	0.000157373	0.000157373	0.000157373	0.000157373	0.000157373	0.000157373	0.000157373	0.000157373	0.000157373	0.000157373	0.000157373
R0892	250.815	250.815	250.815	250.815	250.815	250.814	250.815	250.815	250.815	250.815	250.815	250.815	250.815	250.815	250.815	250.815	250.815	250.815	250.815	250.815	250.815	250.678	250.815	250.815	250.815	250.814	250.815	250.815	250.815	250.815	250.814	250.815	250.815	250.815	250.815	250.815	250.815	250.815	250.815	250.815	250.815	250.815	250.815	250.815	250.815	250.815	250.815	250.815	250.815
R0893	0.0620039	0.0620039	0.0620039	0.0620039	0.0620039	0.0620039	0.0620039	0.0620039	0.0620039	0.0620039	0.0620039	0.0620039	0.0620039	0.0620039	0.0620039	0.0620039	0.0620039	0.0620039	0.0620039	0.0620039	0.0620039	0.0620039	0.0620039	0.0620039	0.0620039	0.0620039	0.0620039	0.0620039	0.0620039	0.0620039	0.0620039	0.0620039	0.0620039	0.0620039	0.0620039	0.0620039	0.0620039	0.0620039	0.0620039	0.0620039	0.0620039	0.0620039	0.0620039	0.0620039	0.0620039	0.0620039	0.0620039	0.0620039	0.0620039
R0894	0.0620039	0.0620039	0.0620039	0.0620039	0.0620039	0.0620039	0.0620039	0.0620039	0.0620039	0.0620039	0.0620039	0.0620039	0.0620039	0.0620039	0.0620039	0.0620039	0.0620039	0.0620039	0.0620039	0.0620039	0.0620039	0.0620039	0.0620039	0.0620039	0.0620039	0.0620039	0.0620039	0.0620039	0.0620039	0.0620039	0.0620039	0.0620039	0.0620039	0.0620039	0.0620039	0.0620039	0.0620039	0.0620039	0.0620039	0.0620039	0.0620039	0.0620039	0.0620039	0.0620039	0.0620039	0.0620039	0.0620039	0.0620039	0.0620039
R0895	160.522	160.522	160.522	160.522	160.522	160.521	160.522	160.522	160.522	160.522	160.522	160.522	160.522	160.522	160.522	160.522	160.522	160.522	160.522	160.522	160.522	160.434	160.522	160.522	160.522	160.521	160.522	160.522	160.522	160.522	160.521	160.522	160.522	160.522	160.522	160.522	160.522	160.522	160.522	160.522	160.522	160.522	160.522	160.522	160.522	160.522	160.522	160.522	160.522
R0896	0	0	0	0	0	0	0	0	0	0	0	0	0	0	0	0	0	0	0	0	0	0	0	0	0	0	0	0	0	0	0	0	0	0	0	0	0	0	0	0	0	0	0	0	0	0	0	0	0
R0897	0	0	0	0	0	0	0	0	0	0	0	0	0	0	0	0	0	0	0	0	0	0	0	0	0	0	0	0	0	0	0	0	0	0	0	0	0	0	0	0	0	0	0	0	0	0	0	0	0
R0898	0	0	0	0	0	0	0	0	0	0	0	0	0	0	0	0	0	0	0	0	0	0	0	0	0	0	0	0	0	0	0	0	0	0	0	0	0	0	0	0	0	0	0	0	0	0	0	0	0
R0899	0.000440644	0.000440644	0.000440644	0.000440644	0.000440644	0.000440644	0.000440644	0.000440644	0.000440644	0.000440644	0.000440644	0.000440644	0.000440644	0.000440644	0.000440644	0.000440644	0.000440644	0.000440644	0.000440644	0.000440644	0.000440644	0.000440644	0.000440644	0.000440644	0.000440644	0.000440644	0.000440644	0.000440644	0.000440644	0.000440644	0.000440644	0.000440644	0.000440644	0.000440644	0.000440644	0.000440644	0.000440644	0.000440644	0.000440644	0.000440644	0.000440644	0.000440644	0.000440644	0.000440644	0.000440644	0.000440644	0.000440644	0.000440644	0.000440644
R0900	0	0	0	0	0	0	0	0	0	0	0	0	0	0	0	0	0	0	0	0	0	0	0	0	0	0	0	0	0	0	0	0	0	0	0	0	0	0	0	0	0	0	0	0	0	0	0	0	0
R0901	0	0	0	0	0	0	0	0	0	0	0	0	0	0	0	0	0	0	0	0	0	0	0	0	0	0	0	0	0	0	0	0	0	0	0	0	0	0	0	0	0	0	0	0	0	0	0	0	0
R0902	3.21486e-13	3.21486e-13	3.21486e-13	3.21486e-13	0	5.42692e-14	4.31345e-15	3.21486e-13	3.21486e-13	3.21486e-13	4.86105e-13	3.21486e-13	0	-1.74536e-13	3.21486e-13	3.21486e-13	-1.08276e-13	3.21486e-13	4.24737e-14	3.21486e-13	-1.08276e-13	-1.65855e-13	3.97214e-14	-1.1961e-13	2.72052e-13	9.45104e-15	1.35523e-13	7.29246e-14	3.21486e-13	1.16825e-13	9.45104e-15	3.21486e-13	3.21486e-13	-1.74536e-13	3.21486e-13	3.21486e-13	3.21486e-13	3.21486e-13	-4.41914e-14	3.21486e-13	3.21486e-13	-5.59873e-14	-5.87756e-14	3.21486e-13	3.21486e-13	3.21486e-13	-1.74536e-13	8.57174e-15	-5.90124e-15
R0903	0.0014391	0.0014391	0.0014391	0.0014391	0.0014391	0.0014391	0.0014391	0.0014391	0.0014391	0.0014391	0.0014391	0.0014391	0.0014391	0.0014391	0.0014391	0.0014391	0.0014391	0.0014391	0.0014391	0.0014391	0.0014391	0.0014391	0.0014391	0.0014391	0.0014391	0.0014391	0.0014391	0.0014391	0.0014391	0.0014391	0.0014391	0.0014391	0.0014391	0.0014391	0.0014391	0.0014391	0.0014391	0.0014391	0.0014391	0.0014391	0.0014391	0.0014391	0.0014391	0.0014391	0.0014391	0.0014391	0.0014391	0.0014391	0.0014391
R0904	250.815	250.815	250.815	250.815	250.815	250.814	250.815	250.815	250.815	250.815	250.815	250.815	250.815	250.815	250.815	250.815	250.815	250.815	250.815	250.815	250.815	250.678	250.815	250.815	250.815	250.814	250.815	250.815	250.815	250.815	250.814	250.815	250.815	250.815	250.815	250.815	250.815	250.815	250.815	250.815	250.815	250.815	250.815	250.815	250.815	250.815	250.815	250.815	250.815
R0905	286.646	286.646	286.646	286.646	286.646	286.645	286.646	286.646	286.646	286.646	286.646	286.646	286.646	286.646	286.646	286.646	286.646	286.646	286.646	286.646	286.646	286.49	286.646	286.646	286.646	286.645	286.646	286.646	286.646	286.646	286.645	286.646	286.646	286.646	286.646	286.646	286.646	286.646	286.646	286.646	286.646	286.646	286.646	286.646	286.646	286.646	286.646	286.646	286.646
R0906	0	0	0	0	0	0	0	0	0	0	0	0	0	0	0	0	0	0	0	0	0	0	0	0	0	0	1.04523e-27	0	0	0	0	0	0	0	0	0	0	0	0	0	0	0	3.49726e-34	0	0	0	0	-1.11912e-31	0
R0907	0.00769511	0.00769511	0.00769511	0.00769511	0.00769511	0.00769511	0.00769511	0.00769511	0.00769511	0.00769511	0.00769511	0.00769511	0.00769511	0.00769511	0.00769511	0.00769511	0.00769511	0.00769511	0.00769511	0.00769511	0.00769511	0.00769511	0.00769511	0.00769511	0.00769511	0.00769511	0.00769511	0.00769511	0.00769511	0.00769511	0.00769511	0.00769511	0.00769511	0.00769511	0.00769511	0.00769511	0.00769511	0.00769511	0.00769511	0.00769511	0.00769511	0.00769511	0.00769511	0.00769511	0.00769511	0.00769511	0.00769511	0.00769511	0.00769511
R0908	501.63	501.63	501.63	501.63	501.63	501.629	501.63	501.63	501.63	501.63	501.63	501.63	501.63	501.63	501.63	501.63	501.63	501.63	501.63	501.63	501.63	501.357	501.63	501.63	501.63	501.629	501.63	501.63	501.63	501.63	501.629	501.63	501.63	501.63	501.63	501.63	501.63	501.63	501.63	501.63	501.63	501.63	501.63	501.63	501.63	501.63	501.63	501.63	501.63
R0910	0	0	0	0	0	0	0	0	0	0	0	0	0	0	0	0	0	0	0	0	0	0	0	0	0	0	0	0	0	0	0	0	0	0	0	0	0	0	0	0	0	0	0	0	0	0	0	0	0
R0911	0	0	0	0	0	0	0	0	0	0	0	0	0	0	0	0	0	0	0	0	0	0	0	0	0	0	0	0	0	0	0	0	0	0	0	0	0	0	0	0	0	0	0	0	0	0	0	0	0
R0912	8.16007e-05	8.16007e-05	8.16007e-05	8.16007e-05	8.16007e-05	8.16007e-05	8.16007e-05	8.16007e-05	8.16007e-05	8.16007e-05	8.16007e-05	8.16007e-05	8.16007e-05	8.16007e-05	8.16007e-05	8.16007e-05	8.16007e-05	8.16007e-05	8.16007e-05	8.16007e-05	8.16007e-05	8.16007e-05	8.16007e-05	8.16007e-05	8.16007e-05	8.16007e-05	8.16007e-05	8.16007e-05	8.16007e-05	8.16007e-05	8.16007e-05	8.16007e-05	8.16007e-05	8.16007e-05	8.16007e-05	8.16007e-05	8.16007e-05	8.16007e-05	8.16007e-05	8.16007e-05	8.16007e-05	8.16007e-05	8.16007e-05	8.16007e-05	8.16007e-05	8.16007e-05	8.16007e-05	8.16007e-05	8.16007e-05
[truncated: 404 more rows]
[truncated: 403 more columns]

## Sheet: minimum flux of FVA
reaction gene	wildtype	YALI0A00264g	YALI0A01133g	YALI0A01870g	YALI0A02541g	YALI0A02915g	YALI0A05379g	YALI0A08041g	YALI0A08217g	YALI0A08668g	YALI0A09042g	YALI0A10032g	YALI0A10310g	YALI0A12045g	YALI0A12353g	YALI0A12573g	YALI0A14498g	YALI0A15147g	YALI0A15972g	YALI0A16379g	YALI0A16698g	YALI0A18183g	YALI0A19206g	YALI0A19558g	YALI0A20108g	YALI0A20680g	YALI0A21153g	YALI0B00220g	YALI0B00572g	YALI0B00726g	YALI0B00792g	YALI0B00836g	YALI0B01298g	YALI0B01826g	YALI0B02178g	YALI0B02376g	YALI0B02728g	YALI0B02852g	YALI0B02948g	YALI0B03124g	YALI0B03564g	YALI0B04202g	YALI0B06006g	YALI0B06941g	YALI0B08536g	YALI0B08943g	YALI0B08965g	YALI0B09515g	YALI0B09537g
[truncated: 1,142 more rows]
[truncated: 403 more columns]

[truncated: 3 more sheets: SD value, Reaction-Gene pairs, culture medium]
